# Supplementary material for: A multi-omics integrative analysis based on CRISPR screens re-defines the pluripotency regulatory network in ESCs
Source: Research Square preprint supplement (doi:10.21203/rs.3.rs-951395/v1), 2023-03-13
Supplement: Supplementary file 1 [file Supplementary Data1.xlsx]

## Sheet: Negative、Positve selection gene
Positive selection genes(1384)	Negative selection genes(2930)
1600014K23Rik	0610009O20Rik
1700003E16Rik	0610010B08Rik
1700012B07Rik	1110004E09Rik
1700012L04Rik	1110008L16Rik
1700016H13Rik	1110025L11Rik
1700020L24Rik	1110037F02Rik
1700024G13Rik	1700001F09Rik
1700028P14Rik	1700021F05Rik
1700037C18Rik	1700123I01Rik
2010005H15Rik	1810013L24Rik
2300005B03Rik	1810026J23Rik
2310009B15Rik	1810043H04Rik
2510002D24Rik	2310003H01Rik
2610524H06Rik	2310036O22Rik
2700089E24Rik	2310061I04Rik
3830403N18Rik	2410015M20Rik
4921511H03Rik	2410127L17Rik
4930430A15Rik	2610507B11Rik
4930513O06Rik	2700062C07Rik
4932438H23Rik	2810004N23Rik
4933403O08Rik	2810006K23Rik
6030419C18Rik	2810408M09Rik
8030411F24Rik	2810474O19Rik
8030423J24Rik	3110009E18Rik
8430408G22Rik	4921524J17Rik
9130019O22Rik	4930467E23Rik
9230110C19Rik	4930503E14Rik
9930111J21Rik1	4930555G01Rik
A630095N17Rik	4930567H17Rik
A830080D01Rik	4931414P19Rik
AA792892	4932443I19Rik
Aadac	4933402J07Rik
Abca16	4933402N22Rik
Abhd12b	5031410I06Rik
Abhd17c	6430573F11Rik
Abhd5	9030624G23Rik
Abi3	9130011E15Rik
Abr	A130010J15Rik
Acat2	A230046K03Rik
Ackr2	A530032D15Rik
Ackr3	Aamp
Acot7	Aar2
Acpp	Aars
Acss1	Aars2
Actn2	Aasdhppt
Actrt1	Aatf
Acvr1c	Abcb10
Adam2	Abcb7
Adam21	Abcd4
Adamts14	Abce1
Adcy2	Abcf1
Adh4	Abcf2
Adrb1	Abhd11
AF529169	Abt1
Aff2	Acad9
Agbl4	Acd
Ago2	Acsf3
Agtr2	Acsl4
Ahcyl1	Actb
Ahdc1	Actg1
AI987944	Actl6a
Aip	Actr10
Akap17b	Actr1a
Akr1c18	Actr1b
Alad	Actr2
Aldh3a2	Actr3
Alx1	Actr5
Amer2	Actr6
Ang4	Actr8
Angel1	Adat2
Angptl3	Adat3
Ankrd13b	Adck4
Ankrd50	Adcy7
Ankrd63	Adhfe1
Anp32a	Adipor1
Antxr2	Adnp
Aoc3	Adnp2
Ap5b1	Adrm1
Ap5m1	Adsl
Ap5s1	AF366264
Apbb1	Agk
Apbb1ip	Agps
Apcdd1	Ahctf1
Apln	Ahcy
Aplnr	Aifm1
Apol11b	Ajuba
Apol8	Ak2
Apon	Akirin2
Arhgap1	Akt2
Arhgap12	Aldoa
Arhgap15	Alg1
Arhgap22	Alg11
Arhgap25	Alg12
Arhgap36	Alg13
Arhgap6	Alg14
Arhgef15	Alg2
Arhgef16	Alg3
Arhgef5	Alg5
Arhgef9	Alg6
Arl15	Alg8
Arl6ip4	Alg9
Arl9	Alkbh1
Armc8	Alkbh5
Armcx4	Alpi
Arntl	Alyref
Arrdc3	Amd1
Arrdc4	Amd2
Art3	Amotl2
Asap1	Anapc1
Asap2	Anapc10
Asap3	Anapc11
Asb4	Anapc13
Asf1a	Anapc2
Asic4	Anapc4
Ass1	Anapc5
Asxl2	Ankle2
Atg12	Ankmy2
Atg16l1	Ankrd11
Atg16l2	Ankrd17
Atg9b	Ankrd49
Atoh7	Anln
Atox1	Anp32b
Atp11c	Ap1m1
Atp1b1	Ap2m1
Atp2b3	Ap2s1
Atp8b1	Ap3b1
Atxn3	Apc
AU022751	Apex1
Avpr1a	Apex2
Avpr2	Apitd1
B3galnt2	Aqr
B4gat1	Arcn1
Bahd1	Arf1
Barhl2	Arf6
BC028528	Arfrp1
BC048403	Arglu1
BC051628	Arhgap19
Bdh2	Arhgef1
Bdkrb1	Arhgef18
Bdnf	Arhgef7
Bend4	Arid1a
Bgn	Arid2
Bhlhe22	Arih1
Bmp15	Arl1
Bmp6	Arl2
Bmp7	Arl8b
Bmp8a	Armc5
Bmx	Armc7
Bmyc	Arpc2
Bok	Arpc3
Bpifb4	Arpc4
Bpifb9a	Arpp19
Bpifb9b	Ascc1
Braf	Ascc2
Brd9	Ascc3
Brinp2	Ash2l
Brpf3	Asna1
Bsph2	Asns
Btg1	Asun
Btla	Atad1
Btnl2	Atad2
Btrc	Atad3a
C1ql3	Atad5
C1qtnf5	Atf7ip
C1s2	Atl2
C7	Atm
C8a	Atmin
Cab39l	Atp13a1
Cabp5	Atp1a1
Cachd1	Atp2a2
Calml3	Atp2b1
Camk4	Atp4b
Capn11	Atp5a1
Capn6	Atp5b
Card14	Atp5c1
Casq2	Atp5d
Cbr4	Atp5e
Cbwd1	Atp5h
Ccdc116	Atp5j
Ccdc120	Atp5j2
Ccdc126	Atp5k
Ccdc160	Atp5l
Ccdc172	Atp5o
Ccdc183	Atp5sl
Ccdc82	Atp6ap1
Ccl2	Atp6v0b
Ccl26	Atp6v0c
Ccl6	Atp6v0d1
Ccm2	Atp6v1a
Ccng2	Atp6v1b2
Ccr8	Atp6v1c1
Cd151	Atp6v1d
Cd200r2	Atp6v1e1
Cd244	Atp6v1f
Cd300lh	Atp6v1g1
Cd3e	Atp6v1h
Cd47	Atpaf2
Cd48	Atr
Cd55	Atrip
Cdc14b	Atrx
Cdc20b	Atxn10
Cdc25b	Atxn2l
Cdc42ep1	Atxn7l3
Cdk10	AU019823
Cdk16	Aurka
Cdk5r1	Aurkaip1
Cdkl4	Aurkb
Cdkn2a	Aym1
Cdon	Azin1
Cdx1	B3galt6
Cdx4	B3gat3
Ceacam11	B4galt1
Cel	B4galt7
Cerk	Babam1
Cfap52	Banf1
Cfi	Bap1
Ch25h	Bard1
Chad	BC005624
Chchd10	BC027231
Chd2	BC030867
Chek2	BC052040
Chic1	BC055324
Chkb	BC061237
Chmp2b	BC107364
Chp2	Bccip
Chpf2	Bcl2l1
Chrdl1	Bclaf1
Chrna2	Bcor
Chrnb2	Bdp1
Chst14	Becn1
Chst8	Bet1
Cited1	Birc5
Cited4	Birc6
Clcn7	Blm
Cldn10	Bloc1s1
Cldn2	Bloc1s2
Cldn23	Bloc1s4
Cldn5	Bms1
Clec10a	Bnip1
Clec12a	Bola3
Clec2h	Bop1
Clec4f	Bora
Clhc1	Bptf
Clic6	Brap
Cnep1r1	Brat1
Cnksr2	Brca1
Cnnm1	Brca2
Cnnm2	Brd2
Cnnm3	Brd4
Cnot4	Brf1
Cnot6	Brf2
Cnot6l	Bri3
Col5a2	Brip1
Col6a5	Brix1
Coro2a	Brms1
Cort	Brpf1
Cox7b2	Btbd9
Cpa3	Btf3
Cplx4	Bub3
Cradd	Bud13
Cramp1l	Bysl
Crp	Bzw1
Crtap	C130026I21Rik
Crygf	C1d
Csde1	C330021F23Rik
Csf1	C330027C09Rik
Csn1s1	Cab39
Csnk1e	Cactin
Cst6	Cacul1
Cst7	Cad
Ctgf	Caml
Cth	Camsap3
Ctnnd2	Cand1
Ctsm	Cap1
Ctsq	Caprin1
Cubn	Capzb
Cul4a	Carm1
Cul5	Cars
Cxcl1	Cars2
Cxcl12	Casc5
Cxcl14	Casp8ap2
Cxcr4	Cbfa2t2
Cxx1a	Cbl
Cxx1c	Cbx2
Cyp1b1	Cbx3
Cyp26c1	Ccdc101
Cyp2b10	Ccdc110
Cyp2b13	Ccdc115
Cyp2c68	Ccdc12
Cyp2e1	Ccdc130
Cyp2j11	Ccdc137
Cyp2j9	Ccdc174
Cyp3a25	Ccdc22
Cyp4f39	Ccdc59
Cypt14	Ccdc84
Cysltr1	Ccdc86
Cyth4	Ccdc90b
Cytl1	Ccdc94
D6Ertd527e	Cchcr1
D730048I06Rik	Ccl19
Dab2	Ccl27a
Dach2	Ccl27b
Dact3	Ccna2
Dag1	Ccnb1
Dalrd3	Ccnd3
Dapk3	Ccne1
Dcaf12l2	Ccnf
Dcaf17	Ccng1
Dcx	Ccnh
Dcxr	Ccnk
Ddah1	Ccnl1
Ddit4	Ccnl2
Defa21	Ccnt1
Defa22	Ccnt2
Depdc5	Cct2
Dfna5	Cct3
Dgke	Cct4
Dguok	Cct5
Dhh	Cct7
Diap2	Cct8
Dirc2	Cd209g
Dll4	Cd2bp2
Dlx1	Cd3eap
Dlx3	Cdan1
Dmc1	Cdc123
Dmrt1	Cdc16
Dmrta2	Cdc20
Dnajb12	Cdc23
Dnajc1	Cdc25a
Dnpep	Cdc26
Dock7	Cdc27
Dok6	Cdc37
Dopey2	Cdc42
Dpys	Cdc45
Draxin	Cdc5l
Drc7	Cdc7
Drp2	Cdc73
Dstyk	Cdca2
Duoxa2	Cdca3
Dusp2	Cdca5
Dzip3	Cdca8
E030030I06Rik	Cdh1
Eddm3b	Cdh11
Efemp1	Cdipt
Efna4	Cdk1
Efna5	Cdk11b
Efnb1	Cdk2
Egfem1	Cdk4
Eif1ax	Cdk7
Eif5a2	Cdk9
Elf4	Cds2
Elf5	Cdt1
Eln	Cdyl2
Emp2	Cebpz
En2	Cenpa
Engase	Cenpc1
Enpep	Cenpe
Enpp3	Cenph
Enthd1	Cenpj
Epas1	Cenpk
Epc1	Cenpm
Epc2	Cenpn
Ephb1	Cenpo
Erp29	Cenpp
Esp3	Cenpq
Esp8	Cenpt
Esx1	Cenpu
Etv4	Cenpw
Etv5	Cep152
Fabp7	Cep192
Fam110c	Cep350
Fam114a1	Cep57
Fam117b	Cep85
Fam120c	Cept1
Fam131a	Cfap20
Fam131b	Cfap221
Fam174a	Chaf1a
Fam178b	Chaf1b
Fam179a	Champ1
Fam193a	Chchd1
Fam199x	Chchd2
Fam20b	Chchd3
Fam213b	Chchd4
Fam26e	Chchd5
Fam43b	Chd1
Fam49a	Chd4
Fam49b	Chd8
Fam50b	Chek1
Fam53c	Cherp
Fam65c	Chmp1a
Fam83h	Chmp3
Fam92a	Chmp6
Farp1	Chmp7
Fbn2	Chordc1
Fbxl20	Chtf18
Fbxo11	Chtf8
Fbxo21	Ciao1
Fbxo33	Ciart
Fbxo38	Cic
Fcrlb	Cinp
Ferd3l	Cir1
Fgf15	Cirbp
Fgf3	Cirh1a
Fgf4	Cisd1
Fgfbp3	Cited2
Fggy	Ckap5
Fgl2	Cks2
Fhod1	Clasp2
Fibcd1	Clasrp
Fignl2	Clcn6
Fjx1	Clip3
Fkbp3	Cln8
Fkrp	Clns1a
Fktn	Clp1
Fmo6	Clpp
Fmo9	Cltc
Foxd1	Cluh
Foxd2	Cmc2
Foxd4	Cmip
Foxg1	Cmpk1
Foxh1	Cmtm2b
Foxj1	Cmtr1
Foxl2	Cmtr2
Foxn1	Cnn3
Foxo3	Cnot1
Foxo4	Cnot10
Foxr2	Cnot2
Frmpd4	Cnot3
Frs3	Cnot8
Fxyd3	Cntrob
Fzd5	Coa4
G630090E17Rik	Coa5
Gabra5	Coa6
Gal3st3	Coa7
Galnt12	Cog1
Gata1	Cog3
Gata3	Cog4
Gata6	Cog5
Gcc1	Cog7
Gem	Cog8
Ggct	Coil
Ggnbp2	Commd3
Ggt6	Commd4
Ghdc	Commd5
Gimap7	Copa
Gja6	Copb2
Glra2	Cope
Gltscr1l	Copg1
Glyatl3	Cops3
Gm10081	Cops4
Gm11128	Cops6
Gm11563	Cops8
Gm11595	Coq2
Gm12253	Coq4
Gm128	Coq5
Gm13043	Coq6
Gm13078	Coro1c
Gm13119	Cox10
Gm13177	Cox11
Gm13298	Cox14
Gm14446	Cox15
Gm14459	Cox16
Gm3696	Cox17
Gm4141	Cox18
Gm4312	Cox19
Gm5108	Cox20
Gm5483	Cox4i1
Gm5635	Cox5b
Gm595	Cox6b1
Gm6406	Cox6c
Gm6592	Cox7b
Gm6760	Cox7c
Gm773	Cpox
Gm8677	Cpsf1
Gm8909	Cpsf2
Gm9112	Cpsf3
Gm960	Cpsf3l
Gm9733	Cpsf4
Gna12	Crcp
Gna13	Crkl
Gnai3	Crnkl1
Gnal	Cse1l
Gnat3	Csnk1a1
Gng10	Csnk2b
Gng12	Csrp2bp
Gng7	Cstf1
Gns	Cstf2
Gopc	Cstf3
Gp1bb	Ctbp2
Gpc1	Ctc1
Gpr135	Ctcf
Gpr143	Ctdp1
Gpr146	Ctnna1
Gpr15	Ctnnbl1
Gpr157	Ctps
Gpr158	Ctr9
Gpr165	Ctu1
Gpr17	Ctu2
Gpr20	Cul1
Gpr35	Cul2
Gpr82	Cul3
Gpr84	Cul4b
Gpx1	Cwc15
Gpx2	Cwc22
Gramd1b	Cwc25
Gramd3	Cwf19l1
Grap2	Cwf19l2
Grem1	Cxxc1
Grin2a	Cyc1
Grp	Cycs
Gsap	Cyfip1
Gstm5	Cyp11b1
Gtpbp10	Cyp4f16
Guca2b	D10Wsu102e
Gucy2g	D19Bwg1357e
Gulo	D2Wsu81e
Gulp1	Dad1
Gyltl1b	Dap3
H2afb1	Dars
H2-DMb2	Dars2
Hand1	Daxx
Havcr1	Dazap1
Hba-a2	Dazl
Hcar1	Dbf4
Hdac7	Dbpht2
Hdgf	Dbr1
Hdhd1a	Dcaf13
Hdx	Dcaf15
Heatr5a	Dcaf7
Hecw2	Dclre1b
Herc6	Dcp2
Hesx1	Dcps
Hey1	Dctn1
Hgh1	Dctn2
Hhex	Dctn3
Hist1h1c	Dctn4
Hist1h1d	Dctn5
Hlf	Dctn6
Hmx3	Dda1
Hn1	Ddb1
Hoxb3	Ddi2
Hoxb6	Ddost
Hoxd11	Ddx1
Hoxd8	Ddx10
Hprt	Ddx11
Hps1	Ddx17
Hps3	Ddx18
Hs6st1	Ddx20
Hs6st2	Ddx21
Hsd17b7	Ddx23
Hsd3b5	Ddx24
Htr1d	Ddx27
Htr2c	Ddx28
Hus1b	Ddx31
Hypm	Ddx39
I830012O16Rik	Ddx3x
Ica1	Ddx41
Ier5	Ddx42
Ifi44	Ddx46
Ifit3	Ddx47
Ifitm5	Ddx49
Ifitm6	Ddx5
Ifna7	Ddx52
Ift27	Ddx54
Igf2bp1	Ddx55
Igfbp7	Ddx56
Il13ra2	Ddx59
Il18	Ddx6
Il3	Deb1
Il31ra	Defa25
Il9r	Defa26
Ina	Degs1
Inafm1	Derl1
Inpp5b	Det1
Inpp5k	Dgcr14
Inppl1	Dgcr8
Insig1	Dhdds
Insig2	Dhfr
Insm1	Dhodh
Iqce	Dhps
Iqch	Dhrs7b
Irf1	Dhx15
Irs1	Dhx16
Itgb5	Dhx29
Itpkb	Dhx30
Itpkc	Dhx33
Itpripl2	Dhx35
Ivl	Dhx36
Jade3	Dhx37
Jagn1	Dhx38
Kbtbd7	Dhx8
Kcnc4	Dicer1
Kcne1l	Dido1
Kcnh2	Diexf
Kcnh8	Dimt1
Kcnip4	Dis3
Kcnj12	Dis3l
Kcnq4	Dkc1
Kcns1	Dlc1
Kcnt1	Dld
Kctd14	Dlgap5
Kctd8	Dlst
Kdm5b	Dmap1
Kdm5d	Dna2
Kera	Dnaaf5
Kif13a	Dnaja1
Kif1b	Dnaja2
Kif26a	Dnaja3
Kif9	Dnajb6
Kir3dl2	Dnajc11
Kirrel3	Dnajc13
Klf12	Dnajc15
Klf13	Dnajc17
Klf16	Dnajc2
Klhl20	Dnajc24
Klra10	Dnajc8
Klra6	Dnajc9
Klrb1c	Dnlz
Klrg2	Dnm1l
Kncn	Dnm2
Krit1	Dnmt1
Krt14	Dnttip1
Krt35	Dock1
Krt4	Dohh
Krt42	Dolk
Krt71	Dolpp1
Krtap17-1	Donson
Krtap4-16	Dpagt1
Lamc1	Dpf2
Lats2	Dph1
Lce1e	Dph2
Lce1f	Dph3
Lcn12	Dph5
Lelp1	Dph6
Lhx9	Dpy30
Limch1	Dr1
Limk2	Drap1
Lipf	Drg1
Lipn	Drosha
Lmbr1	Dscc1
Lmbr1l	Dtymk
Lnp	Dusp12
Lonrf3	Dut
Lpar2	Dync1h1
Lpar4	Dync1i2
Lpcat1	Dynll1
Lpin1	Dynlrb1
Lpin2	Dynlt1a
Lrba	Dynlt1b
Lrch1	Dynlt1f
Lrguk	Dyrk1a
Lrp11	E130309D02Rik
Lrrc10b	E2f4
Lrrc4	E2f6
Lrrc71	E4f1
Ltbp4	Eaf1
Ltc4s	Eapp
Luzp1	Ear2
Lvrn	Ebna1bp2
Ly75	Ecd
Lypd6b	Echs1
Lypla2	Ecsit
Lyz1	Ect2
Maea	Edrf1
Mafb	Eed
Magea10	Eef1a1
Mageb4	Eef1e1
Magix	Eef1g
Magohb	Eef2
Magt1	Eefsec
Map6	Efr3a
Mapk4	Eftud1
March8	Eftud2
Marcks	Ehmt1
Mblac1	Ehmt2
Mboat2	Eif1ad
Mcc	Eif2b1
Mcf2	Eif2b2
Mdga2	Eif2b3
Me1	Eif2b4
Med13	Eif2b5
Med13l	Eif2s1
Medag	Eif2s2
Megf10	Eif2s3x
Meox1	Eif3a
Mettl24	Eif3b
Mettl8	Eif3c
Mex3a	Eif3d
Mfap4	Eif3e
Mfsd7c	Eif3f
Mfsd9	Eif3g
Mgl2	Eif3h
Mier3	Eif3i
Mkln1	Eif3j1
Mlana	Eif3k
Mllt10	Eif3l
Mllt4	Eif3m
Mlxip	Eif4a1
Mmd2	Eif4a3
Mmp13	Eif4e
Mmp16	Eif4e2
Mnx1	Eif4enif1
Morf4l1	Eif4g2
Morn1	Eif5
Mospd2	Eif5a
Mov10l1	Eif6
Moxd1	Elac2
Moxd2	Elavl1
Mpst	Ell
Mrgbp	Elmsan1
Mrgpra2a	Elof1
Mrgprb2	Elp2
Mrgprx2	Elp3
Msc	Elp4
Msi2	Elp5
Msmb	Elp6
Msn	Emc1
Mtm1	Emc2
Mxd3	Emc3
Myh1	Emg1
Myh10	Eny2
Myh6	Ep300
Myh9	Ep400
Myl10	Eprs
Myl6	Ept1
Myo18b	Eral1
Myo1a	Eras
Myo1g	Ercc2
Myo1h	Ercc3
Myo5b	Ercc4
Myo7a	Ercc6l
Myocd	Erh
Myod1	Eri1
Myoz2	Esco2
Myrfl	Esf1
N4bp2l2	Espl1
Naa60	Etf1
Nags	Etfa
Naip5	Etfdh
Nap1l3	Etnk1
Nap1l5	Etv6
Narf	Ewsr1
Nat8l	Exo1
Ncoa5	Exoc1
Ndn	Exoc2
Ndst2	Exoc5
Ndst4	Exoc7
Necab3	Exoc8
Nedd4l	Exosc1
Neurod1	Exosc10
Neurod6	Exosc2
Neurog2	Exosc3
Nfe2l3	Exosc4
Ngfrap1	Exosc5
Nhlh1	Exosc7
Nhlrc3	Exosc8
Nhsl2	Ext2
Ninj2	Extl3
Nkapl	Ezh2
Nkrf	F8a
Nkx2-1	Faf2
Nkx2-4	Fam102a
Nkx2-9	Fam103a1
Nkx3-2	Fam122a
Nlrp1b	Fam136a
Nlrp9c	Fam178a
Nlrx1	Fam207a
Nmb	Fam208a
Nmrk2	Fam210a
Nono	Fam32a
Notch1	Fam50a
Nox3	Fam58b
Nphp4	Fam60a
Nprl2	Fam73b
Nprl3	Fam96b
Nr1d2	Fam98b
Nr1h4	Fanca
Nr4a1	Fancb
Nr4a3	Fancc
Nrn1	Fancd2
Nsdhl	Fancg
Nuak1	Fancl
Nuak2	Fancm
Nxf3	Fars2
Nxpe2	Farsa
Oas1a	Farsb
Obox1	Fastkd1
Ociad1	Fastkd3
Odf2	Fastkd5
Odf3l1	Fau
Ogfod2	Fbl
Ogn	Fbxl4
Olfr1012	Fbxo3
Olfr1028	Fbxo5
Olfr1045	Fbxw11
Olfr1087	Fbxw7
Olfr1101	Fcf1
Olfr1158	Fdps
Olfr1160	Fdx1
Olfr1195	Fdx1l
Olfr1198	Fdxr
Olfr1205	Fech
Olfr1233	Fen1
Olfr1243	Fgfr1op
Olfr1287	Fh1
Olfr1314	Fig4
Olfr1322	Fignl1
Olfr1329	Fip1l1
Olfr146	Fiz1
Olfr16	Fkbp1a
Olfr17	Fkbpl
Olfr187	Flcn
Olfr211	Fnbp4
Olfr218	Fnta
Olfr220	Fntb
Olfr290	Foxd3
Olfr307	Foxk1
Olfr311	Foxk2
Olfr315	Foxred1
Olfr320	Frg1
Olfr324	Frrs1l
Olfr348	Ftl1
Olfr417	Fto
Olfr430	Ftsj2
Olfr477	Ftsj3
Olfr506	Fus
Olfr623	Fxn
Olfr640	G6pdx
Olfr651	Gabpb1
Olfr676	Gadd45gip1
Olfr68	Galnt6
Olfr748	Gapdh
Olfr76	Gar1
Olfr788	Gars
Olfr794	Gart
Olfr823	Gatb
Olfr846	Gbf1
Olfr926	Gcn1l1
Olfr936	Gcsh
Olfr981	Gemin2
Ophn1	Gemin4
Osmr	Gemin5
Ostm1	Gemin6
Otud6a	Gemin7
Otud7a	Gemin8
Otx1	Get4
Oxct2a	Gfer
P2ry10	Gfm1
Pabpc5	Gfm2
Pafah2	Ggps1
Pak4	Gigyf2
Pan2	Gins1
Panx1	Gins2
Pappa2	Gins3
Pard6g	Gins4
Parm1	Gle1
Patl2	Gli2
Pawr	Glmn
Pax9	Glo1
Pbsn	Glrx3
Pcbp4	Glrx5
Pcdh18	Gltscr2
Pcdh19	Gm10104
Pcdh7	Gm10147
Pcdh8	Gm10220
Pcdhb1	Gm10228
Pcdhb5	Gm10229
Pcdhga9	Gm10324
Pcdhgb4	Gm10406
Pcdhgb5	Gm10408
Pcgf3	Gm10413
Pcmt1	Gm10471
Pcnxl3	Gm10662
Pcsk1n	Gm10696
Pcyt1b	Gm10767
Pdcl	Gm11237
Pde4d	Gm11559
Pde6d	Gm11758
Pde9a	Gm13139
Pdgfrl	Gm13157
Pdlim1	Gm13212
Pdxp	Gm13242
Peg10	Gm13251
Pemt	Gm13275
Pfkfb2	Gm13276
Pglyrp2	Gm13288
Pgr	Gm13306
Phactr1	Gm13871
Phc3	Gm14305
Phf11d	Gm14308
Phldb1	Gm14345
Phtf1	Gm14347
Phyhipl	Gm14393
Pi4k2a	Gm14434
Pias1	Gm14440
Pidd1	Gm14496
Piga	Gm14632
Pigf	Gm15284
Pik3r6	Gm15299
Pink1	Gm15319
Pitpnc1	Gm16381
Pitpnm2	Gm16513
Pja1	Gm17019
Pkd1l3	Gm20747
Pkia	Gm20767
Pkn2	Gm20809
Pla2g4d	Gm20815
Pla2g4f	Gm20816
Pla2g6	Gm20831
Plagl1	Gm20852
Plagl2	Gm21319
Plch1	Gm21498
Plcxd1	Gm21637
Pld1	Gm21943
Pln	Gm21951
Plscr3	Gm2696
Plscr4	Gm2897
Plxnc1	Gm2927
Pml	Gm2933
Pnoc	Gm3238
Pnp2	Gm3415
Pnpla3	Gm3488
Pnrc1	Gm3500
Pomgnt1	Gm3558
Pomgnt2	Gm3604
Pomt1	Gm3701
Pomt2	Gm4214
Pon2	Gm4305
Por	Gm4559
Pou3f4	Gm4567
Pou4f2	Gm4763
Pou4f3	Gm4836
Pou5f2	Gm5148
Ppap2a	Gm5458
Ppapdc2	Gm561
Ppm1b	Gm5622
Ppp1r14a	Gm5662
Ppp1r14c	Gm5795
Ppp1r3e	Gm5797
Ppp1r3f	Gm5891
Ppp3r2	Gm6460
Ppp5c	Gm6902
Pqlc1	Gm8300
Praf2	Gm8693
Pramef12	Gm906
Pramel1	Gm9758
Prdm2	Gmcl1l
Prdm6	Gmeb2
Prelid2	Gml
Prelp	Gmnn
Prep	Gmppb
Prkca	Gmps
Prl2a1	Gnb1
Prl7a2	Gnb1l
Prl8a8	Gnb2l1
Prmt6	Gng5
Proser2	Gnl1
Prps2	Gnl2
Prr14	Gnl3
Prr18	Gnl3l
Prr5	Gnpat
Prrg1	Golt1b
Prss23	Gon4l
Psd4	Gosr1
Psg26	Gosr2
Pstpip2	Gpaa1
Ptchd1	Gpatch1
Ptdss2	Gpatch4
Ptger3	Gpatch8
Ptgs2	Gpbp1
Ptpn12	Gpi1
Ptprz1	Gpkow
Ptx4	Gpn1
Pus10	Gpn2
Pvrl3	Gpr107
Pyroxd2	Gpr89
Qk	Gps1
Rab33a	Grb2
Rab3gap2	Grpel1
Rab40c	Grwd1
Raf1	Gspt1
Ralgapb	Gtf2a1
Rap1gds1	Gtf2a2
Rassf7	Gtf2b
Rassf9	Gtf2e1
Raver2	Gtf2e2
Rbpjl	Gtf2f1
Rdh11	Gtf2f2
Rdh13	Gtf2h1
Rdh14	Gtf2h2
Ren1	Gtf2h3
Reps2	Gtf2h4
Rfpl3s	Gtf2h5
Rfpl4b	Gtf3a
Rfxap	Gtf3c1
Rhbdl3	Gtf3c3
Rhob	Gtf3c4
Rhoq	Gtf3c5
Rhot1	Gtf3c6
Rhox13	Gtpbp3
Rhox6	Gtpbp4
Rhox9	Gtpbp8
Ribc2	Guk1
Ric8	H2afj
Rnase13	H2afx
Rnf115	H2afz
Rnf128	Hadha
Rnf138rt1	Hadhb
Rnf186	Hars
Rock1	Hat1
Rock2	Haus1
Rp9	Haus2
Rpgr	Haus3
Rprd2	Haus4
Rprm	Haus5
Rprml	Haus7
Rps6ka3	Haus8
Rpusd2	Hbs1l
Rsph1	Hccs
Rspo1	Hcfc1
Runx2	Hdac1
Rxra	Hdac3
S100a14	Heatr1
S1pr2	Heatr3
Sall3	Heatr5b
Samhd1	Hells
Samt4	Helq
Satl1	Hemt1
Scaf11	Herpud1
Scgb2b15	Hes1
Scgb2b19	Hexim1
Scn8a	Hgs
Scrib	Hinfp
Scx	Hira
Sdk2	Hist1h2ab
Sec1	Hist1h2ac
Sema5a	Hist1h2ad
Sema6b	Hist1h2ae
Sep15	Hist1h2ag
Sept10	Hist1h2ah
Sept2	Hist1h2ai
Serpina1a	Hist1h2ak
Serpina1b	Hist1h2an
Serpina1d	Hist1h2ao
Serpina3c	Hist1h2ap
Serpina3n	Hist1h2bf
Serpinb9b	Hist1h2bh
Serpinf1	Hist1h2bj
Sesn2	Hist1h2bk
Setbp1	Hist1h2bl
Setd1b	Hist1h2bm
Sfxn2	Hist1h2bn
Sgce	Hist1h2bp
Sgk2	Hist1h3a
Sgtb	Hist1h3b
Sh2d1a	Hist1h3c
Sh3glb1	Hist1h3d
Sh3rf3	Hist1h3e
Shisa2	Hist1h3f
Shroom2	Hist1h3g
Shroom3	Hist1h3h
Shroom4	Hist1h3i
Sim1	Hist1h4a
Sirt1	Hist1h4b
Six6	Hist1h4c
Ski	Hist1h4d
Skil	Hist1h4f
Skint3	Hist1h4h
Skint4	Hist1h4j
Skint6	Hist1h4k
Skint8	Hist1h4m
Skor2	Hist1h4n
Slamf6	Hist2h2aa1
Slamf8	Hist2h2aa2
Slc11a1	Hist2h2ac
Slc12a1	Hist2h3b
Slc12a8	Hist2h3c1
Slc15a4	Hist2h3c2
Slc17a9	Hist2h4
Slc19a1	Hist3h2ba
Slc1a4	Hjurp
Slc20a2	Hk2
Slc22a14	Hmbs
Slc22a18	Hmg20a
Slc25a2	Hmgb1
Slc25a25	Hmgb2
Slc26a4	Hmgcr
Slc27a3	Hmgcs1
Slc28a2	Hnrnpa1
Slc2a12	Hnrnpc
Slc2a4	Hnrnpf
Slc30a1	Hnrnpk
Slc38a5	Hnrnpl
Slc45a4	Hnrnpu
Slc48a1	Hscb
Slc4a10	Hsd17b10
Slc5a2	Hsp90ab1
Slc5a3	Hspa14
Slc5a8	Hspa4
Slc6a1	Hspa5
Slc6a15	Hspa8
Slc6a17	Hspa9
Slc6a5	Hspd1
Slc8b1	Hspe1
Slc9a6	Htatip2
Slc9a7	Htatsf1
Slc9b1	Hus1
Slco1b2	Huwe1
Slco4c1	Hyls1
Slfn14	Hyou1
Slfn4	Hypk
Slitrk4	Iars
Smarcd1	Iars2
Smdt1	Iba57
Smim5	Ice1
Smok2b	Ice2
Smpx	Icmt
Smyd5	Id1
Sntb1	Idi1
Sntb2	Idi2
Snx10	Ier2
Snx3	Ifnz
Sobp	Igbp1
Socs1	Ik
Soga3	Ikbkap
Sohlh2	Il6st
Sox10	Ilf2
Sox18	Ilf3
Sox3	Imp3
Sox4	Imp4
Sox8	Impdh2
Sp5	Incenp
Sp9	Ing1
Spag11b	Ing2
Spata18	Ing3
Spata31d1b	Ing4
Spdef	Ing5
Speer3	Ino80
Spem1	Ino80b
Spen	Ints1
Spg20	Ints3
Spopl	Ints4
Spp1	Ints5
Sppl2b	Ints6
Spta1	Ints7
Spty2d1	Ints8
Sqstm1	Ints9
Sry	Ip6k1
Ssfa2	Ipo11
Sstr1	Ipo13
St3gal4	Ipo4
St3gal5	Ipo5
St6galnac1	Ipo7
St8sia2	Ipo9
Stab2	Iqgap1
Stac2	Isca1
Stbd1	Isca2
Stk17b	Iscu
Stk38	Isg20l2
Stmn4	Isy1
Stra8	Itgb1
Sulf1	Itln1
Sult4a1	Itpa
Susd3	Iws1
Suv420h2	Jak1
Svs5	Jarid2
Sycp2	Jmjd1c
Synj2	Jmjd6
Syp	Jtb
Syt10	Kansl2
Syt13	Kansl3
Syt16	Kars
Sytl2	Kat5
Sytl4	Kat7
Sytl5	Kat8
Taar5	Katna1
Tada2b	Katnb1
Tas2r131	Kcnk5
Tas2r136	Kctd10
Taz	Kctd13
Tbc1d14	Kdm1a
Tbc1d8b	Kdm2a
Tbx15	Kdm5c
Tbx4	Kdm8
Tbxa2r	Kdsr
Tc2n	Keap1
Tceal5	Khdrbs1
Tceal8	Khsrp
Tceb3	Kidins220
Tcf15	Kif11
Tcf23	Kif14
Tcf7l1	Kif15
Tchp	Kif18a
Tctex1d1	Kif18b
Tenm1	Kif20b
Tex11	Kif22
Tex14	Kif23
Tex33	Kif2c
Tex38	Kif4
Tfap2c	Kin
Tfeb	Klf2
Tff1	Klf4
Tgfbi	Klhdc10
Tgfbr3	Kmt2b
Tgm5	Kmt2d
Tgtp2	Kntc1
Timm17b	Kpna1
Tjp1	Kpna2
Tjp2	Kpna6
Tlr13	Kpnb1
Tm4sf1	Kri1
Tm6sf1	Krr1
Tm7sf3	Krt39
Tmbim4	Krtap20-2
Tmem100	Krtap4-9
Tmem106a	Krtap5-2
Tmem119	Krtap5-3
Tmem125	Krtap5-4
Tmem154	Krtap6-1
Tmem218	Krtap6-5
Tmem241	Kti12
Tmem243	L1td1
Tmem28	L3mbtl2
Tmem45a2	L3mbtl3
Tmem47	l7Rn6
Tmem5	Lama1
Tmem51	Lamtor1
Tmem64	Lamtor2
Tmem79	Lamtor3
Tmem89	Lamtor4
Tmod3	Larp4
Tmprss3	Lars
Tmsb15a	Lars2
Tmsb15b1	Las1l
Tmsb15b2	Lats1
Tnfrsf25	Lce1c
Tnfsf12	Lce1g
Tnmd	Lce3c
Tnr	Ldha
Tom1l2	Lemd2
Top3b	Leng1
Tor1b	Letm1
Tpm3	Lgals12
Tpo	Lias
Tprn	Lifr
Trak1	Lig1
Trdn	Lig3
Trem2	Lig4
Treml4	Lims1
Trim34b	Lin52
Trim69	Lipt1
Trmt2b	Lipt2
Trmt44	LOC100048884
Trp53	LOC100861615
Trp53bp1	Lonp1
Trpc5	Lpcat3
Trpc7	Lrpprc
Trub1	Lrr1
Tspyl3	Lrrc36
Tspyl4	Lsg1
Tspyl5	Lsm10
Tst	Lsm11
Ttc28	Lsm12
Ttc9	Lsm14a
Ttc9b	Lsm2
Ttpa	Lsm3
Ttpal	Lsm4
Tubg2	Lsm5
Tusc1	Lsm6
Twf1	Lsm7
Txk	Lsm8
Txndc5	Ltv1
Txnip	Lyar
Ubac1	Lyrm2
Ube2dnl1	Lyrm4
Ube2e3	Lztr1
Ube2f	Mad1l1
Ube2ql1	Mad2l1
Ube2u	Mad2l1bp
Ubl4	Magoh
Ublcp1	Mak16
Ubn1	Malsu1
Ubtfl1	Mapk1
Uck2	Mapk14
Ugcg	Mapk1ip1l
Ugt1a6a	Mapkap1
Ugt1a7c	Mapre1
Ugt2a2	March5
Ugt2b37	Mars
Ugt8a	Mars2
Ulbp1	Mastl
Ulk1	Mat2a
Upp1	Matr3
Urah	Mau2
Usp28	Max
Usp33	Mbip
Usp9y	Mbtd1
Uty	Mbtps1
Vangl1	Mcat
Vgll1	Mcm10
Vim	Mcm2
Vip	Mcm3
Vmn1r123	Mcm3ap
Vmn1r137	Mcm4
Vmn1r14	Mcm5
Vmn1r157	Mcm6
Vmn1r199	Mcm7
Vmn1r56	Mcm8
Vmn1r64	Mcm9
Vmn1r71	Mcmbp
Vmn1r80	Mcph1
Vmn2r103	Mcrs1
Vmn2r104	Mcur1
Vmn2r108	Mdc1
Vmn2r121	Mdh2
Vmn2r13	Mdm2
Vmn2r16	Mdm4
Vmn2r54	Mdn1
Vmn2r95	Meaf6
Vsig8	Mecr
Vsx1	Med10
Vwce	Med11
Wbscr17	Med12
Wbscr28	Med14
Wdr45b	Med15
Wdtc1	Med16
Wfdc12	Med17
Wfdc6b	Med18
Wnt11	Med19
Wnt4	Med20
Wwp1	Med21
Xirp2	Med22
Xk	Med23
Xkr6	Med24
Xpo7	Med25
Ybx2	Med26
Ylpm1	Med27
Ythdc2	Med28
Ythdf1	Med29
Ythdf3	Med30
Ywhae	Med31
Ywhag	Med4
Zbtb10	Med7
Zbtb14	Med8
Zc2hc1b	Mepce
Zc3h12a	Metap2
Zc3h12b	Mettl14
Zcchc24	Mettl15
Zcchc5	Mettl16
Zdbf2	Mettl17
Zfand3	Mettl3
Zfp114	Mfap1a
Zfp128	Mfap1b
Zfp174	Mff
Zfp182	Mfn1
Zfp282	Mfn2
Zfp292	Mga
Zfp36l3	Mgat1
Zfp385c	Mif
Zfp39	Minos1
Zfp414	Mios
Zfp445	Mipep
Zfp449	Mis12
Zfp454	Mis18bp1
Zfp472	Mki67
Zfp516	Mllt1
Zfp57	Mlst8
Zfp592	Mmachc
Zfp606	Mmadhc
Zfp616	Mmp15
Zfp639	Mms19
Zfp68	Mms22l
Zfp697	Mnat1
Zfp92	Mob4
Zfp933	Mocs3
Zfy2	Mogs
Zfyve26	Morc2a
Zfyve27	Morc3
Zfyve28	Morf4l2
Zgpat	Mphosph10
Zic2	Mphosph6
Zkscan5	Mphosph8
Zmat3	Mprip
Zrsr2	Mpv17l2
	Mre11a
	Mrgprd
	Mrpl1
	Mrpl10
	Mrpl11
	Mrpl12
	Mrpl13
	Mrpl14
	Mrpl15
	Mrpl16
	Mrpl17
	Mrpl18
	Mrpl19
	Mrpl2
	Mrpl20
	Mrpl22
	Mrpl23
	Mrpl24
	Mrpl27
	Mrpl28
	Mrpl3
	Mrpl30
	Mrpl32
	Mrpl33
	Mrpl34
	Mrpl35
	Mrpl36
	Mrpl37
	Mrpl38
	Mrpl39
	Mrpl4
	Mrpl40
	Mrpl41
	Mrpl42
	Mrpl43
	Mrpl44
	Mrpl45
	Mrpl46
	Mrpl47
	Mrpl48
	Mrpl49
	Mrpl50
	Mrpl51
	Mrpl52
	Mrpl53
	Mrpl54
	Mrpl55
	Mrpl57
	Mrpl9
	Mrps10
	Mrps11
	Mrps12
	Mrps14
	Mrps15
	Mrps16
	Mrps17
	Mrps18a
	Mrps18b
	Mrps18c
	Mrps2
	Mrps21
	Mrps22
	Mrps23
	Mrps24
	Mrps25
	Mrps26
	Mrps27
	Mrps28
	Mrps33
	Mrps34
	Mrps35
	Mrps36
	Mrps5
	Mrps6
	Mrps7
	Mrps9
	Mrrf
	Mrto4
	Msh2
	Msh6
	Msl1
	Msmo1
	Msto1
	Mtbp
	Mtch2
	Mterf3
	Mterf4
	Mtf2
	Mtfmt
	Mtfr1
	Mtg1
	Mtg2
	Mthfd1
	Mtif2
	Mtif3
	Mtmr9
	Mto1
	Mtor
	Mtpap
	Mtrf1l
	Mtrr
	Mtx2
	Mul1
	Mup16
	Mup6
	Mup8
	Mup9
	Mvd
	Mybbp1a
	Mybl2
	Myc
	Mycbp
	Mycn
	Myeov2
	Myl12a
	Myl12b
	Mzf1
	Mzt1
	Mzt2
	N4bp1
	N6amt1
	Naa10
	Naa15
	Naa20
	Naa25
	Naa30
	Naa35
	Naa38
	Naa40
	Naa50
	Naca
	Nacc1
	Nadk
	Nadk2
	Nae1
	Naf1
	Nampt
	Nanog
	Napa
	Narfl
	Nars
	Nars2
	Nat10
	Nat9
	Nbn
	Ncapd2
	Ncapd3
	Ncapg2
	Ncaph
	Ncaph2
	Ncbp1
	Ncbp2
	Ncdn
	Ncl
	Ncoa3
	Ndc1
	Ndc80
	Ndnl2
	Ndor1
	Ndrg3
	Ndufa1
	Ndufa10
	Ndufa11
	Ndufa13
	Ndufa2
	Ndufa3
	Ndufa5
	Ndufa6
	Ndufa8
	Ndufab1
	Ndufaf4
	Ndufaf5
	Ndufaf6
	Ndufaf7
	Ndufb10
	Ndufb11
	Ndufb2
	Ndufb3
	Ndufb4
	Ndufb5
	Ndufb6
	Ndufb7
	Ndufb8
	Ndufb9
	Ndufc1
	Ndufc2
	Ndufs1
	Ndufs2
	Ndufs3
	Ndufs7
	Ndufs8
	Ndufv2
	Nedd8
	Nek2
	Nelfa
	Nelfb
	Nelfcd
	Nelfe
	Nf1
	Nf2
	Nfs1
	Nfu1
	Nfya
	Nfyb
	Nfyc
	Ngdn
	Ngly1
	Ngrn
	Nhp2
	Nhp2l1
	Nifk
	Nip7
	Nipbl
	Nkap
	Nle1
	Nmd3
	Nmnat1
	Noa1
	Nob1
	Noc3l
	Noc4l
	Nol10
	Nol12
	Nol6
	Nol7
	Nolc1
	Nom1
	Nomo1
	Nop10
	Nop14
	Nop16
	Nop2
	Nop56
	Nop58
	Nop9
	Nosip
	Npc1
	Npepps
	Nploc4
	Npm1
	Nr0b1
	Nr2c2ap
	Nr5a2
	Nrbp1
	Nrde2
	Nrf1
	Nrip1
	Nsa2
	Nsd1
	Nsf
	Nsl1
	Nsmce1
	Nsmce2
	Nsmce4a
	Nsun2
	Nsun3
	Nsun4
	Nsun5
	Nubp1
	Nubp2
	Nubpl
	Nudc
	Nudcd2
	Nudcd3
	Nudt21
	Nudt5
	Nufip1
	Numa1
	Nup107
	Nup133
	Nup153
	Nup155
	Nup160
	Nup205
	Nup214
	Nup37
	Nup43
	Nup50
	Nup54
	Nup62
	Nup85
	Nup88
	Nup93
	Nup98
	Nupl1
	Nupl2
	Nus1
	Nutf2
	Nvl
	Nwd1
	Nxf1
	Nxt1
	Obfc1
	Ogdh
	Ogt
	Oip5
	Ola1
	Olfr128
	Olfr1281
	Olfr1371
	Olfr1381
	Olfr461
	Olfr742
	Oma1
	Opa1
	Opa3
	Oraov1
	Orc1
	Orc2
	Orc3
	Orc4
	Orc5
	Orc6
	Osbp
	Oser1
	Osgep
	Osgin1
	Ost4
	Otub1
	Otud4
	Otud6b
	Otulin
	Oxa1l
	Oxnad1
	Oxsm
	Oxsr1
	P3h3
	Pa2g4
	Pabpc1
	Pabpn1
	Paf1
	Pafah1b1
	Paics
	Paip1
	Pak1ip1
	Pak2
	Palb2
	Pam16
	Papss1
	Parg
	Parl
	Parn
	Parp1
	Pars2
	Paxip1
	Pbrm1
	Pcbp2
	Pced1b
	Pcf11
	Pcgf6
	Pcid2
	Pcm1
	Pcna
	Pcnp
	Pcnt
	Pcyt1a
	Pcyt2
	Pdcd11
	Pdcd2
	Pdcd2l
	Pdcd5
	Pdcd7
	Pdcl3
	Pde12
	Pde6g
	Pdrg1
	Pds5a
	Pds5b
	Pdss1
	Pdss2
	Pelo
	Peo1
	Pes1
	Pet100
	Pet117
	Pex1
	Pex10
	Pex11g
	Pex12
	Pex13
	Pex16
	Pex2
	Pex3
	Pex5
	Pex6
	Pex7
	Pfdn1
	Pfdn2
	Pfdn4
	Pfdn5
	Pfdn6
	Pfkp
	Pfn1
	Pgam1
	Pgd
	Pggt1b
	Pgk1
	Pgls
	Pgm3
	Pgrmc2
	Pgs1
	Phax
	Phb
	Phb2
	Phf23
	Phf5a
	Phf6
	Phf8
	Pi4ka
	Pi4kb
	Pias4
	Pigk
	Pigs
	Pigt
	Pigu
	Pih1d1
	Pik3c3
	Pik3ca
	Pik3r2
	Pik3r4
	Pinx1
	Pisd
	Pitpnb
	Pitrm1
	Pkm
	Pkmyt1
	Pknox1
	Plk1
	Pmpca
	Pmpcb
	Pms2
	Pnkp
	Pnn
	Pno1
	Pnpt1
	Poc1a
	Pogz
	Pola1
	Pola2
	Polb
	Pold1
	Pold2
	Pold3
	Poldip2
	Poldip3
	Pole
	Pole2
	Pole3
	Pole4
	Polg
	Polg2
	Polq
	Polr1a
	Polr1b
	Polr1c
	Polr1d
	Polr1e
	Polr2a
	Polr2b
	Polr2d
	Polr2e
	Polr2f
	Polr2g
	Polr2h
	Polr2i
	Polr2j
	Polr2k
	Polr2l
	Polr3a
	Polr3b
	Polr3c
	Polr3d
	Polr3e
	Polr3f
	Polr3h
	Polr3k
	Polrmt
	Pomp
	Pop1
	Pop4
	Pop5
	Pop7
	Pou2f1
	Pou5f1
	Ppa1
	Ppa2
	Ppan
	Ppie
	Ppig
	Ppih
	Ppil1
	Ppil2
	Ppil3
	Ppil4
	Ppm1d
	Ppm1g
	Ppme1
	Ppox
	Ppp1ca
	Ppp1cb
	Ppp1cc
	Ppp1r10
	Ppp1r11
	Ppp1r12a
	Ppp1r12c
	Ppp1r2
	Ppp1r7
	Ppp1r8
	Ppp2ca
	Ppp2r1a
	Ppp2r3c
	Ppp2r4
	Ppp4c
	Ppp4r1
	Ppp6c
	Ppp6r3
	Ppwd1
	Pqbp1
	Prc1
	Prdm10
	Prdm14
	Prdm15
	Prdx1
	Prdx6
	Preb
	Prelid1
	Prepl
	Prim1
	Prim2
	Prkar1a
	Prkcd
	Prkdc
	Prkrip1
	Prkrir
	Prmt1
	Prmt3
	Prmt5
	Prmt7
	Prosc
	Prpf18
	Prpf19
	Prpf3
	Prpf31
	Prpf38a
	Prpf38b
	Prpf4
	Prpf40a
	Prpf4b
	Prpf6
	Prpf8
	Prss33
	Psma1
	Psma3
	Psma4
	Psma5
	Psma6
	Psma7
	Psmb1
	Psmb2
	Psmb3
	Psmb4
	Psmb5
	Psmb6
	Psmb7
	Psmc1
	Psmc2
	Psmc3
	Psmc4
	Psmc5
	Psmc6
	Psmd1
	Psmd11
	Psmd12
	Psmd13
	Psmd14
	Psmd2
	Psmd3
	Psmd4
	Psmd6
	Psmd7
	Psmd8
	Psmg1
	Psmg2
	Psmg3
	Psmg4
	Psors1c2
	Ptar1
	Ptbp1
	Ptcd1
	Ptcd2
	Ptcd3
	Ptdss1
	Ptma
	Ptp4a1
	Ptp4a2
	Ptpn11
	Ptpn2
	Ptpn23
	Puf60
	Purg
	Pus7
	Pwp1
	Pwp2
	Pyroxd1
	Pyurf
	Qars
	Qrich1
	Qrsl1
	Rab1
	Rab10
	Rab12
	Rab35
	Rab7
	Rab8a
	Rab9
[truncated: 931 more rows]

## Sheet: SFigure1e_GOMF
term_name	term_id	adjusted_p_value	negative_log10_of_adjusted_p_value	term_size	query_size	intersection_size	effective_domain_size	intersections
RNA binding	GO:0003723	1.47189e-156	155.832	1251	2676	524	21090	HSD17B10,PNPT1,EEFSEC,METTL14,CTU1,CPSF3,SEPSECS,CLTC,THOC3,DDX55,SKIV2L,CLUH,SNRNP35,TFB1M,TUFM,ELP3,TYMS,EIF2S3X,DDX49,SBDS,EIF6,HNRNPU,SARS2,PABPN1,DDX5,POU5F1,DARS,NR0B1,EIF1AD,LSM8,IARS,RPLP0,TFRC,CPSF1,NSUN3,NCBP1,LRPPRC,RNPC3,CPSF2,SF3B4,DHX33,YARS,SRP72,SMARCE1,EIF3F,AARS2,ASCC3,RNF40,DDX3X,ESF1,TRMU,SNRPC,TSFM,TRUB2,DHX29,DIMT1,GFM1,U2AF1,APEX1,SF1,RSL24D1,PCID2,SOX2,EIF3K,FARS2,MRPL44,E…
nucleic acid binding	GO:0003676	1.56039e-136	135.807	3700	2676	971	21090	HSD17B10,PNPT1,EEFSEC,HIST1H2AE,HIST1H2AN,REXO2,METTL14,CTU1,CPSF3,PRMT5,SEPSECS,CLTC,FEN1,GTF3C1,THOC3,DR1,DDX55,SKIV2L,CMTR1,CLUH,MCM4,SNRNP35,TFB1M,TUFM,ELP3,TYMS,EIF2S3X,DDX49,BANF1,SBDS,EIF6,RTEL1,HNRNPU,XRCC3,NARS2,SARS2,BRAP,PRMT1,PABPN1,DDX5,POU5F1,RBBP4,DARS,NR0B1,TELO2,POLRMT,DNAJC2,SMC2,EIF1AD,LSM8,GRWD1,MAX,TEFM,IARS,RPLP0,TFRC,MRE11A,CPSF1,ERH,NSUN3,NCBP1,HDAC1,LRPPRC,RNPC3,CPSF2,NAR…
heterocyclic compound binding	GO:1901363	6.38364e-115	114.195	5816	2676	1258	21090	HSD17B10,OXSR1,PKMYT1,PNPT1,VRK1,EEFSEC,HIST1H2AE,NDOR1,HIST1H2AN,REXO2,NSF,ATP5A1,METTL14,CTU1,MTG2,NUBP2,CPSF3,CARS2,GPN2,UBA1,NUBPL,PRMT5,SEPSECS,CLTC,FEN1,GTF3C1,THOC3,DR1,NRBP1,DDX55,SKIV2L,CMTR1,ATP6V1A,CLUH,MCM4,SNRNP35,TFB1M,IKBKAP,TUFM,ATP6V1B2,RIOK1,ELP3,TYMS,EIF2S3X,DDX49,BANF1,SBDS,EIF6,RTEL1,HNRNPU,XRCC3,SMC6,PGRMC2,ATP1A1,DUT,NARS2,SMC5,PAICS,TXNRD2,SARS2,BRAP,G6PDX,PRMT1,PABPN1,DDX…
organic cyclic compound binding	GO:0097159	5.10998e-111	110.292	5919	2676	1264	21090	HSD17B10,OXSR1,PKMYT1,PNPT1,VRK1,EEFSEC,HIST1H2AE,NDOR1,HIST1H2AN,REXO2,NSF,ATP5A1,METTL14,CTU1,MTG2,NUBP2,CPSF3,CARS2,GPN2,UBA1,NUBPL,PRMT5,SEPSECS,CLTC,FEN1,GTF3C1,THOC3,DR1,NRBP1,DDX55,SKIV2L,CMTR1,ATP6V1A,CLUH,MCM4,SNRNP35,TFB1M,IKBKAP,TUFM,ATP6V1B2,RIOK1,ELP3,TYMS,EIF2S3X,DDX49,BANF1,SBDS,EIF6,RTEL1,HNRNPU,XRCC3,SMC6,PGRMC2,ATP1A1,DUT,NARS2,SMC5,PAICS,TXNRD2,SARS2,SCAP,BRAP,G6PDX,PRMT1,PABPN…
structural constituent of ribosome	GO:0003735	8.2838e-91	90.0818	176	2676	141	21090	MRPL15,MRPL52,MRPL36,MRPL17,RPLP0,MRPL55,MRPS16,MRPL43,MRPL12,MRPL27,RSL24D1,MRPS21,DAP3,MRPL39,MRPS2,RPL10,MRPS18B,RPL12,RPL36A,MRPL9,MRPL2,MRPL14,FAU,MRPL57,MRPS25,RPL5,RPS4X,RPLP2,RPL8,RPL14,MRPL11,RPS2,RPL29,MRPL49,UBA52,RPS24,RPS16,MRPL37,RPL37A,RPLP1,MRPL33,RPS27,MRPL3,RPL28,MRPS34,RPL30,MRPS5,RPL19,MRPL10,MRPL41,MRPS18A,RPL6,MRPL28,RPL18,RPS10,RPL11,RPS9,RPS11,MRPL54,RPL7L1,RPS26,RPL24,MRP…
catalytic activity, acting on RNA	GO:0140098	1.8015e-70	69.7444	358	2676	186	21090	PNPT1,REXO2,METTL14,CPSF3,CARS2,FEN1,DDX55,SKIV2L,CMTR1,TFB1M,DDX49,NARS2,SARS2,DDX5,RTCB,DARS,HARS,POLRMT,CRCP,IARS,PARS2,NSUN3,NARS,DHX33,TRMT61A,DBR1,YARS,AARS2,POLR3B,QRSL1,DDX3X,TARS,MARS2,DHX29,DIMT1,LARS,APEX1,FARS2,MRPL44,POLR3F,QARS,DDX10,RARS2,POP4,JMJD6,DDX42,RNASEH2A,GATB,EXOSC10,DDX54,VARS2,UPF1,EMG1,DDX28,DIS3,DDX47,POLR2A,POLR2J,TRMT112,AARS,POLR3H,POLR3K,DDX18,POLR1D,TUT1,POLR3A,P…
ATPase activity	GO:0016887	3.14899e-46	45.5018	415	2676	171	21090	NSF,ATP5A1,DDX55,SKIV2L,MCM4,DDX49,RTEL1,XRCC3,DDX5,CLPP,RBBP4,MRE11A,RAD50,DHX33,RFC2,ASCC3,HSPA14,DDX3X,RUVBL2,GINS2,HSPA9,MCM2,DHX29,RAD51D,RAD51,MCM7,DDX10,KIF2C,CDK7,RFC5,TOP2A,ABCE1,DDX42,ERCC2,DDX54,UPF1,MDN1,XRCC6,DDX28,DDX47,SMARCA4,ABCB7,DDX18,RFC4,DNA2,ATP6V1G1,SMARCAD1,PSMC5,PSMC1,ATP5B,SRCAP,KIF18A,MNAT1,ATP5C1,KIF20B,RFC3,PSMC6,DDX59,GTF2H2,FIGNL1,GTF2H3,DDX11,KIF11,SUPV3L1,PSMC4,KI…
helicase activity	GO:0004386	2.16484e-41	40.6646	149	2676	91	21090	DDX55,SKIV2L,MCM4,DDX49,RTEL1,DDX5,MRE11A,DHX33,RFC2,ASCC3,DDX3X,RUVBL2,GINS2,MCM2,DHX29,RAD51,MCM7,DDX10,RFC5,DDX42,ERCC2,DDX54,UPF1,XRCC6,DDX28,DDX47,SMARCA4,DDX18,RFC4,DNA2,SMARCAD1,RFC3,DDX59,DDX11,SUPV3L1,DHX36,CHTF18,CHD8,MCM9,DDX41,DDX21,ERCC3,TTF2,DDX46,SKIV2L2,DHX37,CHTF8,DHX35,DHX8,EIF4A1,DDX20,EP400,DHX15,ERCC6L,DSCC1,SNRNP200,DDX56,RUVBL1,DHX30,RECQL4,FANCM,DHX38,SMARCA5,MCM6,NBN,DDX2…
pyrophosphatase activity	GO:0016462	2.19028e-38	37.6595	843	2676	251	21090	EEFSEC,NSF,ATP5A1,MTG2,GPN2,DDX55,SKIV2L,MCM4,TUFM,EIF2S3X,DDX49,RTEL1,XRCC3,DUT,DDX5,CLPP,RBBP4,MRE11A,RAD50,ITPA,DHX33,PPA2,MTG1,RFC2,ASCC3,HSPA14,DDX3X,RUVBL2,GINS2,HSPA9,GTPBP3,OPA1,MCM2,TUBB5,MFN2,DHX29,RAD51D,GFM1,RAD51,MCM7,DDX10,MFN1,KIF2C,CDK7,RFC5,TOP2A,ATL2,EEF2,ABCE1,DDX42,GFM2,ERCC2,GMPS,DDX54,UPF1,MDN1,XRCC6,TBCC,TUBG1,DDX28,DYNLRB1,RAN,EEF1A1,DDX47,SMARCA4,DNM1L,ARFRP1,PPA1,ABCB7,D…
hydrolase activity, acting on acid anhydrides	GO:0016817	4.31073e-38	37.3654	846	2676	251	21090	EEFSEC,NSF,ATP5A1,MTG2,GPN2,DDX55,SKIV2L,MCM4,TUFM,EIF2S3X,DDX49,RTEL1,XRCC3,DUT,DDX5,CLPP,RBBP4,MRE11A,RAD50,ITPA,DHX33,PPA2,MTG1,RFC2,ASCC3,HSPA14,DDX3X,RUVBL2,GINS2,HSPA9,GTPBP3,OPA1,MCM2,TUBB5,MFN2,DHX29,RAD51D,GFM1,RAD51,MCM7,DDX10,MFN1,KIF2C,CDK7,RFC5,TOP2A,ATL2,EEF2,ABCE1,DDX42,GFM2,ERCC2,GMPS,DDX54,UPF1,MDN1,XRCC6,TBCC,TUBG1,DDX28,DYNLRB1,RAN,EEF1A1,DDX47,SMARCA4,DNM1L,ARFRP1,PPA1,ABCB7,D…
hydrolase activity, acting on acid anhydrides, in phosphorus-containing anhydrides	GO:0016818	4.31073e-38	37.3654	846	2676	251	21090	EEFSEC,NSF,ATP5A1,MTG2,GPN2,DDX55,SKIV2L,MCM4,TUFM,EIF2S3X,DDX49,RTEL1,XRCC3,DUT,DDX5,CLPP,RBBP4,MRE11A,RAD50,ITPA,DHX33,PPA2,MTG1,RFC2,ASCC3,HSPA14,DDX3X,RUVBL2,GINS2,HSPA9,GTPBP3,OPA1,MCM2,TUBB5,MFN2,DHX29,RAD51D,GFM1,RAD51,MCM7,DDX10,MFN1,KIF2C,CDK7,RFC5,TOP2A,ATL2,EEF2,ABCE1,DDX42,GFM2,ERCC2,GMPS,DDX54,UPF1,MDN1,XRCC6,TBCC,TUBG1,DDX28,DYNLRB1,RAN,EEF1A1,DDX47,SMARCA4,DNM1L,ARFRP1,PPA1,ABCB7,D…
nucleoside-triphosphatase activity	GO:0017111	4.42345e-38	37.3542	791	2676	240	21090	EEFSEC,NSF,ATP5A1,MTG2,GPN2,DDX55,SKIV2L,MCM4,TUFM,EIF2S3X,DDX49,RTEL1,XRCC3,DDX5,CLPP,RBBP4,MRE11A,RAD50,DHX33,MTG1,RFC2,ASCC3,HSPA14,DDX3X,RUVBL2,GINS2,HSPA9,GTPBP3,OPA1,MCM2,TUBB5,MFN2,DHX29,RAD51D,GFM1,RAD51,MCM7,DDX10,MFN1,KIF2C,CDK7,RFC5,TOP2A,ATL2,EEF2,ABCE1,DDX42,GFM2,ERCC2,DDX54,UPF1,MDN1,XRCC6,TBCC,TUBG1,DDX28,DYNLRB1,RAN,EEF1A1,DDX47,SMARCA4,DNM1L,ARFRP1,ABCB7,DDX18,GPN1,DYNC1I2,RFC4,D…
ribonucleoprotein complex binding	GO:0043021	1.17669e-37	36.9293	151	2676	88	21090	EEFSEC,PRMT5,SBDS,EIF6,HNRNPU,TIMM50,PRMT1,DDX5,LETM1,DHX33,SRP72,DDX3X,SNRPC,NAA15,DHX29,EIF3K,PELO,BOP1,WDR12,PPIH,EEF2,ABCE1,HNRNPK,RICTOR,MRPS27,SEC61A1,ERAL1,SRP19,EIF3C,PRPF6,CD2BP2,SNRPE,CSNK2B,RPLP1,SNRPD2,GEMIN5,MALSU1,MTIF2,SNRPG,EIF2S1,NMD3,GEMIN4,SRP68,OLA1,RPSA,SNRPD1,MRRF,SNRPD3,RPS21,CKAP5,SNRNP70,NOLC1,RPL35,MTIF3,SEC61B,HNRNPC,SNRPB2,RPL35A,ZFP598,NAA10,PTCD3,EIF4A3,EZH2,SRP54B,N…
DNA-dependent ATPase activity	GO:0008094	1.94987e-34	33.71	104	2676	69	21090	MCM4,RTEL1,XRCC3,RBBP4,MRE11A,RFC2,ASCC3,DDX3X,RUVBL2,GINS2,MCM2,RAD51D,RAD51,MCM7,CDK7,RFC5,TOP2A,ERCC2,XRCC6,SMARCA4,RFC4,DNA2,SMARCAD1,MNAT1,RFC3,GTF2H2,GTF2H3,DDX11,SUPV3L1,GTF2H1,DHX36,CHTF18,CHD8,MCM9,ERCC3,CHTF8,ERCC6L,DSCC1,BPTF,RAD51C,RUVBL1,RECQL4,FANCM,SMARCA5,XRCC2,MCM6,NBN,RAD54L,RAD17,BLM,POLQ,INO80,MCM5,CCNH,MSH6,XRCC5,GTF2H4,CHD4,RAD51B,GTF2F2,BRIP1,MSH2,RFC1,ATRX,MCM8,MCM3,CHD1,G…
rRNA binding	GO:0019843	5.68725e-34	33.2451	67	2676	54	21090	SBDS,RPLP0,EEF2,MRPS27,EMG1,RPL12,DDX28,ERAL1,RPL5,RRS1,RPS4X,RPL8,PPAN,MRPL11,RPF2,RPL37A,IMP3,RPL19,DDX21,RPL6,RPL11,RPS9,RPS11,RPS3,RPS18,MRPL18,MRPL16,NSUN4,NOL12,RPS13,UTP23,MRPS6,RPL7,NCL,RPL23A,MRPS7,RPL37,MRPL20,RPS14,PTCD3,NPM1,RPL3,RPL4,FASTKD5,MRPS18C,MDM2,RPL9,RPL23,MRPS17,MTERF4,CIRBP,RPF1,NGRN,TACO1
DNA binding	GO:0003677	2.17983e-33	32.6616	2135	2676	467	21090	HIST1H2AE,HIST1H2AN,PRMT5,FEN1,GTF3C1,DR1,MCM4,TFB1M,BANF1,RTEL1,HNRNPU,XRCC3,PRMT1,POU5F1,RBBP4,NR0B1,TELO2,POLRMT,DNAJC2,SMC2,GRWD1,MAX,MRE11A,ERH,HDAC1,LRPPRC,DHX33,MED12,SMARCC1,SMARCE1,CENPA,RFC2,ORC5,POLR3B,REV1,CTCF,GTF2B,DDX3X,VPS72,ZFP281,RUVBL2,ORC6,MCM2,POLD2,SSBP1,RAD51D,RAD51,NACA,LIG3,APEX1,TEN1,PCID2,GTF2A1,SOX2,SDE2,RCC1,MCM7,POLR3F,HIST2H3C1,HIST1H4H,ERCC4,TARDBP,POLA2,SNAPC1,HIS…
catalytic activity	GO:0003824	3.6411e-33	32.4388	5904	2676	1027	21090	HSD17B10,HMBS,OXSR1,PKMYT1,PNPT1,VRK1,EEFSEC,NDOR1,RABGGTA,PRPF19,FDPS,REXO2,NSF,RAD9A,ATP5A1,METTL14,CTU1,MTG2,PPP2R1A,GLRX5,CPSF3,CARS2,NDUFAF7,DOHH,GPN2,UBA1,WDR82,PRMT5,SEPSECS,PPP2CA,FEN1,SCO2,VHL,DPH5,KAT8,PPIL2,NRBP1,DDX55,TXN1,SKIV2L,CMTR1,MCM4,FANCL,TFB1M,IKBKAP,TUFM,ATP6V1B2,RIOK1,ELP3,TYMS,RTN4IP1,EIF2S3X,DDX49,RTEL1,RABGGTB,XRCC3,UROD,ATP1A1,TIMM50,DUT,NARS2,PAICS,TXNRD2,SARS2,DPAGT1,…
binding	GO:0005488	5.96946e-33	32.2241	15034	2676	2170	21090	HSD17B10,HMBS,OXSR1,PKMYT1,PNPT1,VRK1,EEFSEC,HIST1H2AE,NDOR1,HIST1H2AN,RABGGTA,COA7,PRPF19,FDPS,REXO2,NSF,RAD9A,ATP5A1,VPS29,METTL14,CTU1,MTG2,NUBP2,PPP2R1A,GLRX5,ZPR1,CPSF3,CARS2,NDUFAF7,DOHH,GPN2,UBA1,WDR82,NUBPL,PRMT5,SEPSECS,TBCA,HSCB,PPP2CA,CLTC,FEN1,SCO2,VHL,IPO13,GTF3C1,NDUFA8,BCCIP,CHMP6,THOC3,KAT8,DR1,NRBP1,DDX55,TXN1,WDR73,SKIV2L,MIOS,CMTR1,ATP6V1A,CLUH,MCM4,SNRNP35,FANCL,TFB1M,IKBKAP,T…
structural molecule activity	GO:0005198	1.28413e-31	30.8914	612	2676	191	21090	MRPL15,MRPL52,CLTC,MRPL36,ISCA2,MRPL17,ISCA1,RPLP0,MRPL55,MRPS16,VPS25,ACTR3,MRPL43,MRPL12,TUBB5,MRPL27,ACTB,RSL24D1,MRPS21,DAP3,NUP85,ACTR2,ARPC4,ARPC2,MRPL39,MRPS2,NUP88,RPL10,MRPS18B,RPL12,TUBG1,RPL36A,MRPL9,MRPL2,MRPL14,FAU,MRPL57,MRPS25,RPL5,RPS4X,RPLP2,RPL8,RPL14,MRPL11,RPS2,RPL29,MRPL49,UBA52,RPS24,RPS16,MRPL37,RPL37A,RPLP1,MRPL33,RPS27,MRPL3,RPL28,MRPS34,RPL30,NUTF2,MRPS5,RPL19,MRPL10,MRP…
purine ribonucleoside triphosphate binding	GO:0035639	1.06366e-28	27.9732	1887	2676	412	21090	OXSR1,PKMYT1,VRK1,EEFSEC,NSF,ATP5A1,MTG2,NUBP2,CARS2,GPN2,UBA1,NUBPL,NRBP1,DDX55,SKIV2L,ATP6V1A,MCM4,IKBKAP,TUFM,ATP6V1B2,RIOK1,EIF2S3X,DDX49,RTEL1,HNRNPU,XRCC3,SMC6,ATP1A1,NARS2,SMC5,PAICS,SARS2,DDX5,RTCB,DARS,STK11,HARS,MOCS3,SMC2,ATAD3A,IARS,DPH6,PARS2,PGS1,NUBP1,NARS,DHX33,YARS,MTG1,CCT7,RFC2,ORC5,AARS2,CLP1,QRSL1,ASCC3,HSPA14,DDX3X,RUVBL2,ACTR3,HSPA9,TRMU,TARS,GTPBP3,ARF1,MARS2,OPA1,MCM2,UBE…
chromatin binding	GO:0003682	3.23566e-28	27.49	576	2676	177	21090	VRK1,WDR82,L3MBTL2,HNRNPU,POU5F1,DNAJC2,GRWD1,UXT,HDAC1,MED12,SMARCC1,CTCF,GTF2B,RUVBL2,HDAC3,SSBP1,KDM8,RAD51,APEX1,RCC1,HIST2H3C1,ERCC4,HIST1H3F,PCNA,TOP2A,SIN3A,UPF1,SMC3,POLR2A,SETDB1,SMARCA4,UBTF,BAP1,POLR3A,SLC30A9,GTF2F1,KAT5,FAM208A,SMARCAD1,NANOG,STAT3,NUDT21,POLG,RNF8,NOC3L,DNMT1,CSNK2B,HINFP,POLE,TRIM28,E2F4,DDX11,PAF1,BRD4,WAC,ENY2,RPA1,GTF2H1,CHD8,MCM9,SREBF2,POLD1,NCAPH2,CDT1,SUPT5,…
nucleotide binding	GO:0000166	3.40804e-28	27.4675	2225	2676	465	21090	OXSR1,PKMYT1,VRK1,EEFSEC,NDOR1,NSF,ATP5A1,MTG2,NUBP2,CARS2,GPN2,UBA1,NUBPL,PRMT5,NRBP1,DDX55,SKIV2L,ATP6V1A,MCM4,IKBKAP,TUFM,ATP6V1B2,RIOK1,TYMS,EIF2S3X,DDX49,RTEL1,HNRNPU,XRCC3,SMC6,ATP1A1,DUT,NARS2,SMC5,PAICS,TXNRD2,SARS2,G6PDX,PRMT1,DDX5,RTCB,DARS,STK11,HARS,MOCS3,SMC2,ATAD3A,CRCP,IARS,DPH6,PARS2,ERH,PGS1,NUBP1,ITPA,VDAC1,NARS,DHX33,NDUFS2,YARS,MTG1,CCT7,RFC2,ORC5,AARS2,CLP1,QRSL1,ASCC3,HSPA14…
nucleoside phosphate binding	GO:1901265	3.40804e-28	27.4675	2225	2676	465	21090	OXSR1,PKMYT1,VRK1,EEFSEC,NDOR1,NSF,ATP5A1,MTG2,NUBP2,CARS2,GPN2,UBA1,NUBPL,PRMT5,NRBP1,DDX55,SKIV2L,ATP6V1A,MCM4,IKBKAP,TUFM,ATP6V1B2,RIOK1,TYMS,EIF2S3X,DDX49,RTEL1,HNRNPU,XRCC3,SMC6,ATP1A1,DUT,NARS2,SMC5,PAICS,TXNRD2,SARS2,G6PDX,PRMT1,DDX5,RTCB,DARS,STK11,HARS,MOCS3,SMC2,ATAD3A,CRCP,IARS,DPH6,PARS2,ERH,PGS1,NUBP1,ITPA,VDAC1,NARS,DHX33,NDUFS2,YARS,MTG1,CCT7,RFC2,ORC5,AARS2,CLP1,QRSL1,ASCC3,HSPA14…
catalytic activity, acting on DNA	GO:0140097	5.04593e-27	26.2971	196	2676	89	21090	RAD9A,FEN1,MCM4,RTEL1,XRCC3,MRE11A,RFC2,ASCC3,REV1,DDX3X,RUVBL2,GINS2,MCM2,POLD2,RAD51,LIG3,APEX1,MCM7,ERCC4,POLA2,PCNA,RFC5,TOP2A,ERCC2,XRCC6,DKC1,LIG4,RFC4,DNA2,SMARCAD1,POLG,LIG1,DNMT1,RAD1,POLE,RFC3,DDX11,SUPV3L1,DCLRE1B,DHX36,CHTF18,CHD8,MCM9,POLD1,ERCC3,RPS3,CHTF8,ERCC6L,DSCC1,RAD51C,N6AMT1,POLG2,RUVBL1,RECQL4,TDG,FANCM,RBBP8,POLB,MCM6,NBN,RAD54L,DDX1,POLE2,BLM,POLQ,TERF1,ALKBH1,EXO1,MCM5,P…
purine nucleotide binding	GO:0017076	1.15432e-26	25.9377	1976	2676	420	21090	OXSR1,PKMYT1,VRK1,EEFSEC,NSF,ATP5A1,MTG2,NUBP2,CARS2,GPN2,UBA1,NUBPL,NRBP1,DDX55,SKIV2L,ATP6V1A,MCM4,IKBKAP,TUFM,ATP6V1B2,RIOK1,EIF2S3X,DDX49,RTEL1,HNRNPU,XRCC3,SMC6,ATP1A1,NARS2,SMC5,PAICS,SARS2,DDX5,RTCB,DARS,STK11,HARS,MOCS3,SMC2,ATAD3A,IARS,DPH6,PARS2,PGS1,NUBP1,NARS,DHX33,YARS,MTG1,CCT7,RFC2,ORC5,AARS2,CLP1,QRSL1,ASCC3,HSPA14,DDX3X,RUVBL2,ACTR3,HSPA9,TRMU,TARS,GTPBP3,ARF1,MARS2,OPA1,MCM2,UBE…
ATP binding	GO:0005524	3.40455e-26	25.4679	1523	2676	344	21090	OXSR1,PKMYT1,VRK1,NSF,ATP5A1,NUBP2,CARS2,UBA1,NUBPL,NRBP1,DDX55,SKIV2L,ATP6V1A,MCM4,IKBKAP,ATP6V1B2,RIOK1,DDX49,RTEL1,HNRNPU,XRCC3,SMC6,ATP1A1,NARS2,SMC5,PAICS,SARS2,DDX5,DARS,STK11,HARS,MOCS3,SMC2,ATAD3A,IARS,DPH6,PARS2,PGS1,NUBP1,NARS,DHX33,YARS,CCT7,RFC2,ORC5,AARS2,CLP1,QRSL1,ASCC3,HSPA14,DDX3X,RUVBL2,ACTR3,HSPA9,TRMU,TARS,MARS2,MCM2,UBE2M,CCT2,DHX29,MAT2A,RAD51D,LARS,TCP1,ACTB,RAD51,LIG3,FARS…
ribonucleotide binding	GO:0032553	3.66715e-26	25.4357	1980	2676	419	21090	OXSR1,PKMYT1,VRK1,EEFSEC,NDOR1,NSF,ATP5A1,MTG2,NUBP2,CARS2,GPN2,UBA1,NUBPL,NRBP1,DDX55,SKIV2L,ATP6V1A,MCM4,IKBKAP,TUFM,ATP6V1B2,RIOK1,EIF2S3X,DDX49,RTEL1,HNRNPU,XRCC3,SMC6,ATP1A1,NARS2,SMC5,PAICS,SARS2,DDX5,RTCB,DARS,STK11,HARS,MOCS3,SMC2,ATAD3A,IARS,DPH6,PARS2,PGS1,NUBP1,NARS,DHX33,YARS,MTG1,CCT7,RFC2,ORC5,AARS2,CLP1,QRSL1,ASCC3,HSPA14,DDX3X,RUVBL2,ACTR3,HSPA9,TRMU,TARS,GTPBP3,ARF1,MARS2,OPA1,MC…
purine ribonucleotide binding	GO:0032555	4.39648e-26	25.3569	1963	2676	416	21090	OXSR1,PKMYT1,VRK1,EEFSEC,NSF,ATP5A1,MTG2,NUBP2,CARS2,GPN2,UBA1,NUBPL,NRBP1,DDX55,SKIV2L,ATP6V1A,MCM4,IKBKAP,TUFM,ATP6V1B2,RIOK1,EIF2S3X,DDX49,RTEL1,HNRNPU,XRCC3,SMC6,ATP1A1,NARS2,SMC5,PAICS,SARS2,DDX5,RTCB,DARS,STK11,HARS,MOCS3,SMC2,ATAD3A,IARS,DPH6,PARS2,PGS1,NUBP1,NARS,DHX33,YARS,MTG1,CCT7,RFC2,ORC5,AARS2,CLP1,QRSL1,ASCC3,HSPA14,DDX3X,RUVBL2,ACTR3,HSPA9,TRMU,TARS,GTPBP3,ARF1,MARS2,OPA1,MCM2,UBE…
nucleotidyltransferase activity	GO:0016779	1.02291e-24	23.9902	124	2676	66	21090	PNPT1,CTU1,MOCS3,POLRMT,CRCP,POLR3B,REV1,POLD2,POLR3F,GMPPB,POLA2,TAMM41,DKC1,POLR2A,POLR2J,CDS2,POLR3H,POLR3K,POLR1D,TUT1,POLR3A,POLR2I,KARS,EIF2B3,POLG,PRIM1,POLE,POLR1C,POLR1B,RPAP1,POLD1,MTPAP,POLR3C,POLR2L,POLR2H,POLG2,POLR2D,PRIM2,THG1L,POLR2G,POLB,POLR2B,PCYT1A,POLE2,POLQ,TERF1,PCYT2,POLR1A,POLR2K,CTU2,POLD3,TRNT1,POLR2F,REV3L,POLR3D,POLR2E,PAPSS1,TWISTNB,YRDC,TERF2,ZNRD1,NMNAT1,POLR1E,NUD…
enzyme binding	GO:0019899	2.17231e-24	23.6631	2353	2676	472	21090	OXSR1,VRK1,HIST1H2AE,HIST1H2AN,RABGGTA,NSF,RAD9A,ATP5A1,ZPR1,NDUFAF7,PPP2CA,CLTC,VHL,IPO13,KAT8,TXN1,FANCL,BANF1,RTEL1,RABGGTB,HNRNPU,TIMM17A,SMC6,ATP1A1,PRMT1,PABPN1,DDX5,CLPP,CDC37,POU5F1,RBBP4,LAMTOR4,TELO2,IPO7,IARS,TFRC,CPSF1,HDAC1,LRPPRC,VDAC1,RACGAP1,NDUFS2,NEDD8,ATP6V0C,RFC2,GLRX3,RNF40,GTF2B,RUVBL2,ACTR3,HSPA9,IGBP1,OPA1,UQCRC1,RBX1,MCM2,HDAC3,TUBB5,CCT2,MFN2,TCP1,ACTB,RAD51,BIRC5,RCC1,E…
adenyl nucleotide binding	GO:0030554	6.43209e-24	23.1916	1601	2676	350	21090	OXSR1,PKMYT1,VRK1,NSF,ATP5A1,NUBP2,CARS2,UBA1,NUBPL,NRBP1,DDX55,SKIV2L,ATP6V1A,MCM4,IKBKAP,ATP6V1B2,RIOK1,DDX49,RTEL1,HNRNPU,XRCC3,SMC6,ATP1A1,NARS2,SMC5,PAICS,SARS2,DDX5,DARS,STK11,HARS,MOCS3,SMC2,ATAD3A,IARS,DPH6,PARS2,PGS1,NUBP1,NARS,DHX33,YARS,CCT7,RFC2,ORC5,AARS2,CLP1,QRSL1,ASCC3,HSPA14,DDX3X,RUVBL2,ACTR3,HSPA9,TRMU,TARS,MARS2,MCM2,UBE2M,CCT2,DHX29,MAT2A,RAD51D,LARS,TCP1,ACTB,RAD51,LIG3,FARS…
adenyl ribonucleotide binding	GO:0032559	1.35361e-23	22.8685	1589	2676	347	21090	OXSR1,PKMYT1,VRK1,NSF,ATP5A1,NUBP2,CARS2,UBA1,NUBPL,NRBP1,DDX55,SKIV2L,ATP6V1A,MCM4,IKBKAP,ATP6V1B2,RIOK1,DDX49,RTEL1,HNRNPU,XRCC3,SMC6,ATP1A1,NARS2,SMC5,PAICS,SARS2,DDX5,DARS,STK11,HARS,MOCS3,SMC2,ATAD3A,IARS,DPH6,PARS2,PGS1,NUBP1,NARS,DHX33,YARS,CCT7,RFC2,ORC5,AARS2,CLP1,QRSL1,ASCC3,HSPA14,DDX3X,RUVBL2,ACTR3,HSPA9,TRMU,TARS,MARS2,MCM2,UBE2M,CCT2,DHX29,MAT2A,RAD51D,LARS,TCP1,ACTB,RAD51,LIG3,FARS…
DNA helicase activity	GO:0003678	7.92908e-22	21.1008	71	2676	46	21090	MCM4,RTEL1,MRE11A,RFC2,ASCC3,DDX3X,RUVBL2,GINS2,MCM2,RAD51,MCM7,RFC5,ERCC2,XRCC6,RFC4,DNA2,SMARCAD1,RFC3,DDX11,SUPV3L1,DHX36,CHTF18,CHD8,MCM9,ERCC3,CHTF8,ERCC6L,DSCC1,RUVBL1,RECQL4,FANCM,MCM6,NBN,BLM,POLQ,MCM5,XRCC5,CHD4,GTF2F2,BRIP1,ATRX,MCM8,MCM3,CHD1,GINS4,HELQ
ligase activity, forming carbon-oxygen bonds	GO:0016875	8.95389e-22	21.048	43	2676	35	21090	CARS2,NARS2,SARS2,DARS,HARS,IARS,PARS2,NARS,YARS,AARS2,TARS,MARS2,LARS,FARS2,QARS,RARS2,VARS2,AARS,KARS,VARS,GARS,FARSA,IARS2,DARS2,LARS2,WARS,MARS,WARS2,EPRS,RARS,TARS2,YARS2,CARS,SARS,FARSB
aminoacyl-tRNA ligase activity	GO:0004812	8.95389e-22	21.048	43	2676	35	21090	CARS2,NARS2,SARS2,DARS,HARS,IARS,PARS2,NARS,YARS,AARS2,TARS,MARS2,LARS,FARS2,QARS,RARS2,VARS2,AARS,KARS,VARS,GARS,FARSA,IARS2,DARS2,LARS2,WARS,MARS,WARS2,EPRS,RARS,TARS2,YARS2,CARS,SARS,FARSB
protein binding	GO:0005515	6.68633e-21	20.1748	10241	2676	1540	21090	OXSR1,VRK1,EEFSEC,HIST1H2AE,HIST1H2AN,RABGGTA,COA7,PRPF19,NSF,RAD9A,ATP5A1,VPS29,METTL14,NUBP2,PPP2R1A,ZPR1,NDUFAF7,UBA1,WDR82,PRMT5,SEPSECS,TBCA,HSCB,PPP2CA,CLTC,VHL,IPO13,BCCIP,CHMP6,THOC3,KAT8,DR1,NRBP1,TXN1,WDR73,MIOS,CMTR1,CLUH,MCM4,FANCL,IKBKAP,EXOC7,L3MBTL2,TYMS,PDRG1,PAK1IP1,BANF1,SBDS,MRPL17,RTEL1,RABGGTB,HNRNPU,TIMM17A,TIMM10,SMC6,PGRMC2,ATP1A1,TIMM50,DUT,PAICS,SCAP,BRAP,G6PDX,PRMT1,PAB…
catalytic activity, acting on a tRNA	GO:0140101	1.29972e-20	19.8861	116	2676	59	21090	CARS2,NARS2,SARS2,DARS,HARS,IARS,PARS2,NSUN3,NARS,TRMT61A,YARS,AARS2,QRSL1,TARS,MARS2,LARS,FARS2,QARS,RARS2,POP4,GATB,VARS2,AARS,TRIT1,TRMT5,KARS,MTFMT,VARS,RPP38,RPP30,RPP21,GARS,FARSA,IARS2,DARS2,RPP14,NSUN4,LARS2,POP5,POP7,WARS,ELAC2,MARS,WARS2,POP1,TSEN2,TRMT10C,EPRS,ALKBH1,RARS,NSUN2,TRNT1,TARS2,YARS2,CARS,SARS,FARSB,TSEN34,FTO
DNA-directed 5'-3' RNA polymerase activity	GO:0003899	1.38653e-20	19.8581	36	2676	31	21090	POLRMT,CRCP,POLR3B,POLR3F,POLR2A,POLR2J,POLR3H,POLR3K,POLR1D,POLR3A,POLR2I,PRIM1,POLR1C,POLR1B,RPAP1,POLR3C,POLR2L,POLR2H,POLR2D,PRIM2,POLR2G,POLR2B,POLR1A,POLR2K,POLR2F,POLR3D,POLR2E,TWISTNB,ZNRD1,POLR1E,POLR3E
RNA polymerase activity	GO:0097747	3.58127e-19	18.446	38	2676	31	21090	POLRMT,CRCP,POLR3B,POLR3F,POLR2A,POLR2J,POLR3H,POLR3K,POLR1D,POLR3A,POLR2I,PRIM1,POLR1C,POLR1B,RPAP1,POLR3C,POLR2L,POLR2H,POLR2D,PRIM2,POLR2G,POLR2B,POLR1A,POLR2K,POLR2F,POLR3D,POLR2E,TWISTNB,ZNRD1,POLR1E,POLR3E
5'-3' RNA polymerase activity	GO:0034062	3.58127e-19	18.446	38	2676	31	21090	POLRMT,CRCP,POLR3B,POLR3F,POLR2A,POLR2J,POLR3H,POLR3K,POLR1D,POLR3A,POLR2I,PRIM1,POLR1C,POLR1B,RPAP1,POLR3C,POLR2L,POLR2H,POLR2D,PRIM2,POLR2G,POLR2B,POLR1A,POLR2K,POLR2F,POLR3D,POLR2E,TWISTNB,ZNRD1,POLR1E,POLR3E
histone binding	GO:0042393	2.14061e-18	17.6695	252	2676	90	21090	VRK1,KAT8,L3MBTL2,DNAJC2,GRWD1,IPO7,SMARCC1,VPS72,MCM2,KDM8,HJURP,RCC1,PIH1D1,PWP1,YEATS4,SMARCA4,CXXC1,KAT5,SRCAP,RNF8,HINFP,NCAPG2,BRD4,FH1,CHAF1B,CHD8,WDR5,USP16,UHRF1,TONSL,DAXX,MPHOSPH8,RNF20,BPTF,MTF2,ANP32B,SMARCA5,BRD2,NCL,NCAPD2,ING1,HAT1,DPF2,KAT7,MBTD1,SBNO2,INO80,WRAP53,TAF7,GM20809,NPM1,MCM3AP,MSH6,GM20815,GM20747,ING3,SPIN1,PHF8,PTMA,CARM1,TBL1X,RBBP5,SART3,NCAPD3,TBL1XR1,CKS2,ATAD2…
carbohydrate derivative binding	GO:0097367	2.44398e-18	17.6119	2289	2676	439	21090	OXSR1,PKMYT1,VRK1,EEFSEC,NDOR1,NSF,ATP5A1,MTG2,NUBP2,CARS2,GPN2,UBA1,NUBPL,NRBP1,DDX55,SKIV2L,ATP6V1A,MCM4,IKBKAP,TUFM,ATP6V1B2,RIOK1,EIF2S3X,DDX49,RTEL1,HNRNPU,XRCC3,SMC6,ATP1A1,DUT,NARS2,SMC5,PAICS,SARS2,DDX5,RTCB,DARS,STK11,HARS,MOCS3,SMC2,ATAD3A,IARS,DPH6,PARS2,PGS1,NUBP1,NARS,DHX33,YARS,MTG1,CCT7,RFC2,ORC5,AARS2,CLP1,POLR3B,QRSL1,ASCC3,HSPA14,DDX3X,RUVBL2,ACTR3,HSPA9,TRMU,TARS,GTPBP3,ARF1,MA…
small molecule binding	GO:0036094	3.21809e-17	16.4924	2651	2676	489	21090	HMBS,OXSR1,PKMYT1,VRK1,EEFSEC,NDOR1,NSF,ATP5A1,MTG2,NUBP2,CARS2,GPN2,UBA1,NUBPL,PRMT5,NRBP1,DDX55,SKIV2L,ATP6V1A,MCM4,IKBKAP,TUFM,ATP6V1B2,RIOK1,TYMS,EIF2S3X,DDX49,RTEL1,HNRNPU,XRCC3,SMC6,ATP1A1,DUT,NARS2,SMC5,PAICS,TXNRD2,SARS2,SCAP,G6PDX,PRMT1,DDX5,RTCB,DARS,STK11,HARS,MOCS3,SMC2,ATAD3A,CRCP,IARS,CDIPT,DPH6,PARS2,ERH,PGS1,NUBP1,ITPA,VDAC1,NARS,DHX33,NDUFS2,YARS,MTG1,CCT7,RFC2,ORC5,AARS2,CLP1,PO…
RNA helicase activity	GO:0003724	6.59544e-17	16.1808	67	2676	40	21090	DDX55,SKIV2L,DDX49,DDX5,DHX33,DDX3X,DHX29,DDX10,DDX42,DDX54,UPF1,DDX28,DDX47,DDX18,DDX59,SUPV3L1,DHX36,DDX41,DDX21,DDX46,SKIV2L2,DHX8,EIF4A1,DDX20,DHX15,SNRNP200,DDX56,DHX30,FANCM,DDX27,DDX1,EIF4A3,AQR,DDX24,DDX52,BRIP1,DDX6,DDX31,DDX17,DDX39
snRNA binding	GO:0017069	4.25368e-16	15.3712	41	2676	30	21090	SNRNP35,HNRNPU,RNPC3,SNRPC,NCBP2,LSM11,RBM22,SNRPA1,TUT1,LSM10,GEMIN5,PRPF8,DDX21,EFTUD2,CDK9,METTL16,SNRPD3,TOE1,SNRNP70,SNRPB2,PRPF4,HEXIM1,SART3,LSM3,EIF5A,CCNT2,PRPF31,MEPCE,COIL,CCNT1
transcription factor binding	GO:0008134	6.93987e-16	15.1586	703	2676	173	21090	VHL,IPO13,KAT8,DR1,HNRNPU,DDX5,MECR,POU5F1,NR0B1,HDAC1,DHX33,MED12,SMARCE1,DCAF13,GTF2B,DDX3X,RUVBL2,RBX1,HDAC3,EAF1,ACTB,NACA,APEX1,GTF2A1,SNF8,ERCC4,TPT1,NCOA3,PCNA,SPOP,PDCD11,SIN3A,MMS19,HNRNPK,PARP1,DDX54,DNAJA3,UBA2,PSMA6,SMARCA4,PRPF6,SLC30A9,GTF2F1,HNRNPF,KAT5,PSMC5,PSMC1,NANOG,STAT3,KEAP1,PSMD4,TBP,DNMT1,CSNK2B,NCAPG2,MYBBP1A,NOP58,E2F4,CDC5L,CTDP1,UBA3,MGA,MYC,RARG,MED30,SUMO2,ERCC3,RPS…
translation regulator activity	GO:0045182	2.37906e-15	14.6236	145	2676	60	21090	EEFSEC,TUFM,TYMS,EIF2S3X,EIF6,EIF1AD,EIF3F,TSFM,DHX29,GFM1,EIF3K,EIF3D,EIF2B1,EIF3A,DHFR,EEF2,RPL10,EEF1A1,EIF5,EIF3C,AARS,2810006K23RIK,EIF2B2,EIF3I,EIF2B3,TRIM71,EIF3H,EEF1G,EIF2B4,EIF3L,MTIF2,EIF2B5,EIF2S1,RPS9,EIF4E2,GM5662,ETF1,EIF4A1,EIF3E,GM8300,MTIF3,EIF3B,RPS14,EIF4A3,EIF4E,EIF3G,MTRF1L,ABCF1,GSPT1,CYFIP1,DAZL,HBS1L,EIF3M,EIF5A,CIRBP,EIF3J1,MTOR,PAIP1,GM21319,EIF2S2
tRNA binding	GO:0000049	3.48782e-15	14.4574	60	2676	36	21090	HSD17B10,EEFSEC,CTU1,SEPSECS,ELP3,SARS2,IARS,NSUN3,YARS,AARS2,TRMU,FARS2,MRPS27,EEF1A1,AARS,KARS,SSB,NAT10,PTCD1,FARSA,IARS2,RPL6,RPS10,NSUN4,MARS,TRMT10C,ALKBH1,RARS,CTU2,NSUN2,TRNT1,YARS2,CARS,SARS,YRDC,XPO5
translation regulator activity, nucleic acid binding	GO:0090079	5.52379e-15	14.2578	112	2676	51	21090	EEFSEC,TUFM,TYMS,EIF2S3X,EIF6,EIF1AD,EIF3F,TSFM,DHX29,GFM1,EIF3K,EIF3D,EIF2B1,EIF3A,DHFR,EEF2,EEF1A1,EIF5,EIF3C,2810006K23RIK,EIF2B2,EIF3I,EIF2B3,EIF3H,EEF1G,EIF2B4,EIF3L,MTIF2,EIF2B5,EIF2S1,EIF4E2,GM5662,ETF1,EIF4A1,EIF3E,GM8300,MTIF3,EIF3B,EIF4E,EIF3G,MTRF1L,ABCF1,GSPT1,DAZL,HBS1L,EIF3M,EIF5A,EIF3J1,PAIP1,GM21319,EIF2S2
translation factor activity, RNA binding	GO:0008135	1.8126e-14	13.7417	96	2676	46	21090	EEFSEC,TUFM,EIF2S3X,EIF6,EIF1AD,EIF3F,TSFM,DHX29,GFM1,EIF3K,EIF3D,EIF2B1,EIF3A,EEF2,EEF1A1,EIF5,EIF3C,2810006K23RIK,EIF2B2,EIF3I,EIF2B3,EIF3H,EEF1G,EIF2B4,EIF3L,MTIF2,EIF2B5,EIF2S1,EIF4E2,GM5662,ETF1,EIF4A1,EIF3E,GM8300,MTIF3,EIF3B,EIF4E,EIF3G,MTRF1L,GSPT1,HBS1L,EIF3M,EIF5A,EIF3J1,GM21319,EIF2S2
ligase activity	GO:0016874	5.08432e-14	13.2938	153	2676	60	21090	CARS2,UBA1,NARS2,PAICS,SARS2,RTCB,DARS,HARS,MOCS3,IARS,DPH6,PARS2,NARS,YARS,AARS2,QRSL1,TARS,MARS2,LARS,LIG3,FARS2,QARS,RARS2,ACSL4,GATB,GMPS,VARS2,UBA2,LIG4,AARS,KARS,VARS,LIG1,UBA3,GARS,FARSA,IARS2,DARS2,SAE1,LARS2,ACSF3,GART,LIPT2,WARS,MARS,WARS2,CAD,EPRS,RARS,TARS2,MDM2,YARS2,CARS,SARS,ASNS,FARSB,UBA6,MTHFD1,CTPS,NAE1
nuclease activity	GO:0004518	5.15819e-14	13.2875	196	2676	70	21090	PNPT1,REXO2,RAD9A,CPSF3,FEN1,XRCC3,MRE11A,DBR1,APEX1,MRPL44,PELO,ERCC4,POP4,RNASEH2A,EXOSC10,DIS3,EXOSC3,RNASEH2B,DNA2,POLG,RAD1,RPP38,POLE,RPP30,RPP21,DCLRE1B,POLD1,RPS3,RPP14,CNOT8,DROSHA,RAD51C,TOE1,PARN,POP5,YBEY,FANCM,POP7,ELAC2,PDE12,POP1,RBBP8,TSEN2,DDX1,DICER1,TSEN15,EXO1,RNASEK,RCL1,DIS3L,SND1,USB1,APEX2,REXO1,RNASEH1,CNOT2,CNOT1,XRCC1,DCP2,TSEN34,DGCR8,NOB1,XRN1,LAS1L,RNASET2A,ERI1,ISG2…
transferase activity	GO:0016740	7.93794e-14	13.1003	2365	2676	431	21090	HMBS,OXSR1,PKMYT1,PNPT1,VRK1,RABGGTA,PRPF19,FDPS,ATP5A1,METTL14,CTU1,NDUFAF7,WDR82,PRMT5,SEPSECS,VHL,DPH5,KAT8,PPIL2,NRBP1,CMTR1,FANCL,TFB1M,IKBKAP,RIOK1,ELP3,TYMS,RABGGTB,DPAGT1,BRAP,PRMT1,ALG13,STK11,MOCS3,POLRMT,METTL17,SKP1A,YKT6,CRCP,CDIPT,FAM98B,MED20,NSUN3,DPH2,PGS1,MED12,TRMT61A,MCAT,SMARCE1,CLP1,POLR3B,RNF40,REV1,GTF2B,NFS1,TRMU,ALG1,UMPS,DLST,RBX1,NAA15,UBE2M,TRAIP,DIMT1,PDSS1,POLD2,MAT…
single-stranded DNA binding	GO:0003697	1.14527e-13	12.9411	111	2676	49	21090	MCM4,HNRNPU,SMC2,LRPPRC,MCM2,SSBP1,RAD51D,RAD51,TEN1,MCM7,ERCC4,HNRNPK,ALYREF,PRIM1,DDX11,RPA1,DHX36,MCM9,POLR3C,SMC4,RTF1,NOL12,POLR2H,SWSAP1,LONP1,YBX1,POLR2G,NCL,RPA2,HNRNPA1,RBBP8,MCM6,BLM,TERF1,MCM5,TOP3A,TOP1,RPA3,CDC45,MCM10,CTC1,RAD51B,MSH2,BRCA2,MCM8,TERF2,MCM3,PCBP2,POLA1
mRNA binding	GO:0003729	3.33993e-13	12.4763	367	2676	104	21090	EEFSEC,METTL14,CLUH,SNRNP35,TYMS,HNRNPU,DDX5,CPSF1,NCBP1,DHX33,RNF40,DDX3X,SNRPC,EIF3D,PABPC1,NCBP2,TARDBP,EIF3A,DHFR,SRSF1,HNRNPK,EEF1A1,SRSF3,RPL5,PPIE,TUT1,RBPMS,ILF3,RPS2,NUDT21,SRSF5,SSB,PPP1R8,HNRNPL,CCT5,GEMIN5,RPL30,DHX36,TRA2B,RPL6,SUPT5,RPS26,RPS3,ETF1,EXOSC8,RPS5,COPA,RPS13,UTP23,RPS6,RNF20,RBM25,SNRNP70,RPL7,YBX1,GNL3,RPL35,NCL,RPL26,CSTF2,RSL1D1,HNRNPA1,RBPMS2,MRPS7,HNRNPC,THOC2,RPS1…
general transcription initiation factor binding	GO:0140296	1.62785e-12	11.7884	41	2676	27	21090	DR1,HNRNPU,GTF2B,RUVBL2,NACA,GTF2A1,ERCC4,HNRNPF,PSMC5,PSMC1,TBP,NOP58,CTDP1,RPTOR,GTF2A2,CAND1,RUVBL1,BRF1,ZNHIT6,PSMC2,TAF2,TAF7,FBL,BDP1,MTOR,YEATS2,POLR1E
iron-sulfur cluster binding	GO:0051536	3.66956e-12	11.4354	67	2676	35	21090	NUBP2,GLRX5,NUBPL,ELP3,ISCA2,RTEL1,ISCA1,NUBP1,NDUFS2,ISCU,GLRX3,NFS1,LIAS,ERCC2,NARFL,FXN,NDUFS7,DNA2,NDUFS8,NDUFS1,NFU1,POLE,DDX11,SDHB,POLD1,NDUFV2,UQCRFS1,FDX1L,PRIM2,FDX1,ETFDH,REV3L,BRIP1,POLA1,CISD1
metal cluster binding	GO:0051540	3.66956e-12	11.4354	67	2676	35	21090	NUBP2,GLRX5,NUBPL,ELP3,ISCA2,RTEL1,ISCA1,NUBP1,NDUFS2,ISCU,GLRX3,NFS1,LIAS,ERCC2,NARFL,FXN,NDUFS7,DNA2,NDUFS8,NDUFS1,NFU1,POLE,DDX11,SDHB,POLD1,NDUFV2,UQCRFS1,FDX1L,PRIM2,FDX1,ETFDH,REV3L,BRIP1,POLA1,CISD1
DNA replication origin binding	GO:0003688	4.67261e-12	11.3304	22	2676	19	21090	MCM4,GRWD1,ORC5,MCM2,MCM7,ORC3,DDX11,MCM9,ORC4,MCM6,KAT7,ORC2,ORC1,MCM5,CDC45,MCM10,MCM8,MCM3,POLA1
transcription coregulator activity	GO:0003712	4.84279e-12	11.3149	477	2676	122	21090	DR1,HNRNPU,POU5F1,NR0B1,MED26,MED20,UXT,HDAC1,MED12,ZFP281,RUVBL2,HDAC3,NACA,APEX1,MED7,MED10,NCOA3,JMJD6,SIN3A,MMS19,TADA1,DDX54,SMARCA4,PRPF6,WDR77,SLC30A9,RBPMS,KAT5,NANOG,TAF13,HINFP,MYBBP1A,TRIM28,SCAI,MED21,BRD4,GMEB2,ENY2,RARG,MED30,MED18,TRRAP,USP16,MED14,EP300,MED24,ZMIZ2,TFB2M,DAXX,RNF20,DMAP1,GTF2A2,MED4,HMGB2,MED22,RUVBL1,TDG,RYBP,SMARCB1,MED16,ATXN7L3,TCERG1,RBBP8,DRAP1,DDX1,HCFC1,PI…
hydrolase activity	GO:0016787	1.6798e-11	10.7747	2550	2676	447	21090	PNPT1,EEFSEC,REXO2,NSF,RAD9A,ATP5A1,MTG2,PPP2R1A,CPSF3,GPN2,PPP2CA,FEN1,DDX55,SKIV2L,MCM4,TUFM,ATP6V1B2,RIOK1,EIF2S3X,DDX49,RTEL1,XRCC3,ATP1A1,TIMM50,DUT,DDX5,ALG13,CLPP,PTP4A2,RBBP4,IARS,MRE11A,RAD50,PSMD14,HDAC1,ITPA,DHX33,DBR1,PPA2,MTG1,EIF3F,RFC2,AARS2,QRSL1,ASCC3,HSPA14,DDX3X,RUVBL2,GINS2,HSPA9,GTPBP3,OPA1,PPP4C,MCM2,HDAC3,TUBB5,PPP6C,MFN2,DHX29,ADAT3,RAD51D,KDM8,LARS,GFM1,MBTPS1,RAD51,APEX1…
protein heterodimerization activity	GO:0046982	3.46382e-11	10.4604	365	2676	99	21090	HIST1H2AE,HIST1H2AN,RABGGTA,PPP2R1A,PRMT5,PPP2CA,DR1,RABGGTB,ATP1A1,CENPA,PDSS1,BIRC5,GTF2A1,RCC1,HIST2H3C1,HIST1H4H,HIST1H3F,TOP2A,LSM7,POLE3,UBA2,RAN,SMC3,TRMT112,TAF13,HIST1H2BN,TAF8,HIST1H4N,POLE4,UBA3,ALG2,RRAGC,HIST1H2BP,HIST1H3G,LSM6,CENPW,SUPT5,H2AFZ,HIST1H4M,PIK3R2,HIST1H2AB,SAE1,RRAGA,HIST1H3D,HIST2H2AA2,HIST2H3B,HIST1H4B,HIST1H3H,GTF2A2,HIST1H4A,AURKA,HIST1H4F,NOLC1,TAF6,LSM5,HIST1H2BK…
peptide N-acetyltransferase activity	GO:0034212	6.15845e-11	10.2105	72	2676	35	21090	KAT8,GTF2B,NCOA3,TADA1,KAT5,GTF3C4,MEAF6,KANSL3,BRPF1,WDR5,NAA35,NAA20,EP300,MED24,OGT,MCRS1,NAA50,HAT1,DPF2,KAT7,HCFC1,NAA10,NAA25,NAA40,KANSL2,MCM3AP,TAF6L,ING3,BRCA2,USP22,TADA3,TAF5L,SUPT3,NAA30,TADA2A
translation initiation factor activity	GO:0003743	6.30497e-11	10.2003	65	2676	33	21090	EIF2S3X,EIF6,EIF1AD,EIF3F,DHX29,EIF3K,EIF3D,EIF2B1,EIF3A,EIF5,EIF3C,EIF2B2,EIF3I,EIF2B3,EIF3H,EIF2B4,EIF3L,MTIF2,EIF2B5,EIF2S1,EIF4E2,GM5662,EIF4A1,EIF3E,GM8300,MTIF3,EIF3B,EIF4E,EIF3G,EIF3M,EIF3J1,GM21319,EIF2S2
ribosome binding	GO:0043022	8.15108e-11	10.0888	62	2676	32	21090	SBDS,EIF6,LETM1,SRP72,NAA15,EIF3K,PELO,EEF2,RICTOR,MRPS27,SEC61A1,SRP19,EIF3C,GEMIN5,EIF2S1,SRP68,OLA1,RPSA,RPS21,MTIF3,SEC61B,ZFP598,NAA10,MTRF1L,GCN1L1,ABCF1,OXA1L,HSPA5,EIF5A,MTOR,TACO1,PRMT3
4 iron, 4 sulfur cluster binding	GO:0051539	1.03669e-10	9.98435	40	2676	25	21090	NUBP2,NUBPL,ELP3,ISCA2,RTEL1,NUBP1,NDUFS2,ISCU,LIAS,ERCC2,NARFL,NDUFS7,DNA2,NDUFS8,NDUFS1,NFU1,POLE,DDX11,SDHB,POLD1,PRIM2,ETFDH,REV3L,BRIP1,POLA1
ribonuclease activity	GO:0004540	1.21283e-10	9.9162	112	2676	45	21090	PNPT1,REXO2,CPSF3,FEN1,DBR1,APEX1,MRPL44,POP4,RNASEH2A,EXOSC10,DIS3,RNASEH2B,RPP38,RPP30,RPP21,RPP14,CNOT8,DROSHA,TOE1,PARN,POP5,YBEY,POP7,ELAC2,PDE12,POP1,TSEN2,DICER1,RNASEK,RCL1,DIS3L,SND1,USB1,RNASEH1,CNOT2,CNOT1,DCP2,TSEN34,DGCR8,NOB1,XRN1,RNASET2A,ISG20L2,EAR2,XRN2
snoRNA binding	GO:0030515	3.19632e-10	9.49535	30	2676	21	21090	DKC1,NOP14,WDR3,NOP58,IMP3,IMP4,DDX21,BMS1,NUFIP1,NHP2,NOLC1,HEATR1,GAR1,NOP56,RRP9,NOP10,BYSL,UTP6,TBL3,TSR1,NUDT5
ubiquitin protein ligase binding	GO:0031625	3.28221e-10	9.48383	309	2676	86	21090	FANCL,SMC6,POU5F1,LRPPRC,NDUFS2,NEDD8,ATP6V0C,RNF40,HSPA9,UQCRC1,RBX1,TUBB5,CCT2,MFN2,TCP1,GPI1,SPOP,UBE2N,ARIH1,POLR2A,DNM1L,RPL5,CUL3,ANAPC2,RNF8,UBA52,TRIM28,DET1,FAF2,CUL4B,MYC,PSMA3,TPI1,RPL11,SUMO2,EIF4E2,VCP,PRKAR1A,RRAGA,RANGAP1,UBE2K,TUBA1B,DAXX,RNF20,HSPD1,PSMD1,USP7,AURKA,GLMN,RPA2,RPS27A,OTUB1,PIAS4,BECN1,BRCA1,HSP90AB1,TSG101,MUL1,WRAP53,SMAD2,HSPA8,XRCC5,CUL2,MDM2,DNAJA1,CAML,RPL23,…
ubiquitin-like protein ligase binding	GO:0044389	4.27666e-10	9.3689	326	2676	89	21090	FANCL,SMC6,POU5F1,LRPPRC,NDUFS2,NEDD8,ATP6V0C,RNF40,HSPA9,UQCRC1,RBX1,TUBB5,CCT2,MFN2,TCP1,GPI1,SPOP,UBE2N,ARIH1,POLR2A,DNM1L,RPL5,CUL3,ANAPC2,RNF8,UBA52,TRIM28,DET1,FAF2,CUL4B,MYC,PSMA3,TPI1,RPL11,SUMO2,EIF4E2,VCP,PRKAR1A,RRAGA,RANGAP1,UBE2K,TUBA1B,DAXX,UBE2C,RNF20,HSPD1,PSMD1,USP7,AURKA,GLMN,RPA2,RPS27A,OTUB1,PIAS4,BECN1,BRCA1,HSP90AB1,TSG101,MUL1,WRAP53,SMAD2,HSPA8,XRCC5,HGS,CUL2,MDM2,DNAJA1,C…
N-acetyltransferase activity	GO:0008080	6.32739e-10	9.19878	96	2676	40	21090	KAT8,ELP3,SMARCE1,GTF2B,NCOA3,TADA1,KAT5,GTF3C4,NAT10,MEAF6,KANSL3,BRPF1,WDR5,NAA35,NAA20,EP300,MED24,ESCO2,OGT,MCRS1,NAA50,HAT1,DPF2,KAT7,HCFC1,NAA10,NAA25,NAA40,KANSL2,MCM3AP,TAF6L,ING3,BRCA2,NAT9,USP22,TADA3,TAF5L,SUPT3,NAA30,TADA2A
unfolded protein binding	GO:0051082	6.32739e-10	9.19878	96	2676	40	21090	PDRG1,CDC37,CCT7,HSPA14,HSPA9,PFDN5,CCT2,TCP1,PPIH,DNAJA3,PPIE,PFDN6,CCT3,CCT4,HEATR3,NUDCD3,HSPE1,GRPEL1,CCT5,UBE4B,NUDC,HSPD1,DNAJA2,CCT8,CCDC115,HSP90AB1,SRSF10,NPM1,PFDN1,PFDN2,HSPA8,SYVN1,DNAJA1,PFDN4,TOMM20,HSPA5,NUDCD2,DNAJB6,PPIG,PET100
protein-containing complex binding	GO:0044877	1.23822e-09	8.9072	1433	2676	271	21090	VRK1,EEFSEC,NSF,PRMT5,PPP2CA,VHL,NDUFA8,CHMP6,SBDS,EIF6,HNRNPU,TIMM50,SCAP,PRMT1,DDX5,STK11,TELO2,LETM1,MAX,TFRC,PSMD14,HDAC1,VDAC1,DHX33,SRP72,RNF40,DDX3X,RUVBL2,ACTR3,IGBP1,SNRPC,OPA1,PPP4C,UQCRC1,RBX1,NAA15,TUBB5,DHX29,APEX1,EIF3K,RCC1,PELO,NAPA,ACTR2,ERCC4,BOP1,ARPC4,PCNA,CDK7,PSMG3,JMJD6,WDR12,ARPC2,PPIH,EEF2,ABCE1,SIN3A,HNRNPK,ATR,RICTOR,MRPS27,XRCC6,DNAJA3,RAN,SEC61A1,SMC3,SMARCA4,DNM1L,ER…
histone acetyltransferase activity	GO:0004402	2.35887e-09	8.6273	61	2676	30	21090	KAT8,GTF2B,NCOA3,TADA1,KAT5,GTF3C4,MEAF6,KANSL3,BRPF1,WDR5,EP300,MED24,OGT,MCRS1,NAA50,HAT1,DPF2,KAT7,HCFC1,NAA40,KANSL2,MCM3AP,TAF6L,ING3,BRCA2,USP22,TADA3,TAF5L,SUPT3,TADA2A
S-adenosylmethionine-dependent methyltransferase activity	GO:0008757	6.14386e-09	8.21156	150	2676	51	21090	METTL14,NDUFAF7,WDR82,PRMT5,DPH5,CMTR1,TFB1M,PRMT1,NSUN3,TRMT61A,DIMT1,SETD5,COQ5,EMG1,SETDB1,TRMT112,CXXC1,TRMT5,FTSJ3,DNMT1,KMT2B,WDR5,TFB2M,NSUN4,SETD2,METTL16,N6AMT1,TRMT10C,CMTR2,EZH2,NSUN2,FAM103A1,EHMT2,EED,RNMT,NOP2,SETD1A,FBL,CARM1,RBBP5,ASH2L,PRMT7,METTL15,EHMT1,SUZ12,KMT2D,ICMT,MEPCE,NSD1,METTL3,PRMT3
peptide-lysine-N-acetyltransferase activity	GO:0061733	6.73937e-09	8.17138	63	2676	30	21090	KAT8,GTF2B,NCOA3,TADA1,KAT5,GTF3C4,MEAF6,KANSL3,BRPF1,WDR5,EP300,MED24,OGT,MCRS1,NAA50,HAT1,DPF2,KAT7,HCFC1,NAA40,KANSL2,MCM3AP,TAF6L,ING3,BRCA2,USP22,TADA3,TAF5L,SUPT3,TADA2A
damaged DNA binding	GO:0003684	7.28348e-09	8.13766	56	2676	28	21090	REV1,APEX1,SDE2,ERCC4,PCNA,ERCC2,XRCC6,DDB1,CUL4B,RPA1,DCLRE1B,POLD1,RPS3,EP300,HMGB2,RECQL4,RPA2,RBBP8,POLB,NBN,BLM,BRCA1,MSH6,XRCC5,RPA3,XRCC1,MSH2,H2AFX
basal RNA polymerase II transcription machinery binding	GO:0001099	9.57646e-09	8.01879	53	2676	27	21090	HNRNPU,GTF2B,RUVBL2,ERCC4,ELP2,RPRD1B,GTF2E1,CDC73,TBP,NOP58,CTR9,CTDP1,PAF1,BRD4,WAC,RTF1,WDR43,ELOF1,RUVBL1,ELP4,ZNHIT6,TAF2,TAF7,SUPT4A,FBL,PCF11,SCAF4
basal transcription machinery binding	GO:0001098	9.57646e-09	8.01879	53	2676	27	21090	HNRNPU,GTF2B,RUVBL2,ERCC4,ELP2,RPRD1B,GTF2E1,CDC73,TBP,NOP58,CTR9,CTDP1,PAF1,BRD4,WAC,RTF1,WDR43,ELOF1,RUVBL1,ELP4,ZNHIT6,TAF2,TAF7,SUPT4A,FBL,PCF11,SCAF4
exonuclease activity	GO:0004527	3.42652e-08	7.46515	74	2676	32	21090	PNPT1,REXO2,RAD9A,CPSF3,FEN1,MRE11A,APEX1,EXOSC10,DIS3,EXOSC3,POLG,RAD1,POLE,DCLRE1B,POLD1,CNOT8,TOE1,PARN,PDE12,DDX1,EXO1,DIS3L,USB1,APEX2,REXO1,CNOT2,CNOT1,DCP2,XRN1,ERI1,ISG20L2,XRN2
protein N-terminus binding	GO:0047485	5.73814e-08	7.24123	126	2676	44	21090	CHMP6,BANF1,HDAC1,SMARCC1,SMARCE1,VPS25,SNF8,ERCC4,NCOA3,ERCC2,PARP1,SMARCA4,MNAT1,GTF2H2,PHB2,GTF2H3,ALG2,ERCC3,SCFD1,DAXX,EIF3E,ATM,RPS21,PEX5,HYPK,RBPJ,RPA2,NBN,NPM1,ZWINT,EXOC5,NIPBL,DCTN4,MAU2,MDM2,ID1,ARF6,TSC1,TBL1XR1,EIF5A,TAF11,PPP1CC,STX5A,EXOC2
transferase activity, transferring one-carbon groups	GO:0016741	7.08587e-08	7.14961	223	2676	64	21090	METTL14,NDUFAF7,WDR82,PRMT5,DPH5,CMTR1,TFB1M,TYMS,PRMT1,METTL17,FAM98B,NSUN3,TRMT61A,DIMT1,SETD5,COQ5,EMG1,PRDM10,SETDB1,TRMT112,CXXC1,TRMT5,FTSJ3,MTFMT,DNMT1,KMT2B,WDR5,PRDM14,TFB2M,NSUN4,SETD2,METTL16,NDUFAF5,N6AMT1,GART,CAD,TRMT10C,CMTR2,EZH2,NSUN2,FAM103A1,EHMT2,EED,RNMT,NOP2,PRDM15,SETD1A,FBL,CARM1,RBBP5,NSUN5,ASH2L,PRMT7,GCSH,TGS1,METTL15,EHMT1,SUZ12,KMT2D,ICMT,MEPCE,NSD1,METTL3,PRMT3
endonuclease activity	GO:0004519	1.20125e-07	6.92037	124	2676	43	21090	CPSF3,FEN1,XRCC3,MRE11A,DBR1,APEX1,MRPL44,PELO,ERCC4,POP4,RNASEH2A,DIS3,RNASEH2B,DNA2,RPP38,RPP30,RPP21,RPS3,RPP14,DROSHA,RAD51C,POP5,YBEY,POP7,ELAC2,POP1,RBBP8,TSEN2,DICER1,EXO1,RNASEK,RCL1,SND1,APEX2,RNASEH1,XRCC1,TSEN34,DGCR8,NOB1,LAS1L,RNASET2A,SLX4,EAR2
pre-mRNA binding	GO:0036002	1.30758e-07	6.88353	34	2676	20	21090	HNRNPU,DDX5,RNPC3,SNRPC,U2AF1,SF1,TARDBP,RBM22,HNRNPK,HNRNPL,PTBP1,U2AF2,PRPF8,TRA2B,EP300,HNRNPA1,SLU7,SRSF2,SLBP,SRSF6
methyltransferase activity	GO:0008168	1.37774e-07	6.86083	211	2676	61	21090	METTL14,NDUFAF7,WDR82,PRMT5,DPH5,CMTR1,TFB1M,TYMS,PRMT1,METTL17,FAM98B,NSUN3,TRMT61A,DIMT1,SETD5,COQ5,EMG1,PRDM10,SETDB1,TRMT112,CXXC1,TRMT5,FTSJ3,DNMT1,KMT2B,WDR5,PRDM14,TFB2M,NSUN4,SETD2,METTL16,NDUFAF5,N6AMT1,TRMT10C,CMTR2,EZH2,NSUN2,FAM103A1,EHMT2,EED,RNMT,NOP2,PRDM15,SETD1A,FBL,CARM1,RBBP5,NSUN5,ASH2L,PRMT7,GCSH,TGS1,METTL15,EHMT1,SUZ12,KMT2D,ICMT,MEPCE,NSD1,METTL3,PRMT3
acetyltransferase activity	GO:0016407	1.39129e-07	6.85658	120	2676	42	21090	KAT8,ELP3,SMARCE1,GTF2B,NAA15,NCOA3,TADA1,KAT5,GTF3C4,NAT10,MEAF6,KANSL3,BRPF1,WDR5,NAA35,NAA20,EP300,MED24,GNPAT,ESCO2,OGT,MCRS1,NAA50,HAT1,DPF2,KAT7,HCFC1,NAA10,NAA25,NAA40,KANSL2,MCM3AP,TAF6L,ING3,BRCA2,NAT9,USP22,TADA3,TAF5L,SUPT3,NAA30,TADA2A
general transcription initiation factor activity	GO:0140223	1.44922e-07	6.83887	20	2676	15	21090	GTF2B,GTF2A1,GTF2E2,SNAPC5,GTF2F1,GTF2E1,TBP,GTF2H2,GTF2H3,GTF2A2,TAF5,TAF6,TAF7,GTF2H4,RRN3
anion binding	GO:0043168	2.05543e-07	6.6871	2894	2676	473	21090	HMBS,OXSR1,PKMYT1,VRK1,EEFSEC,NDOR1,NSF,ATP5A1,MTG2,NUBP2,CARS2,GPN2,UBA1,NUBPL,NRBP1,DDX55,SKIV2L,ATP6V1A,MCM4,IKBKAP,TUFM,ATP6V1B2,RIOK1,TYMS,EIF2S3X,DDX49,RTEL1,HNRNPU,XRCC3,SMC6,ATP1A1,NARS2,SMC5,PAICS,TXNRD2,SARS2,DDX5,RTCB,DARS,STK11,HARS,MOCS3,SMC2,ATAD3A,IARS,DPH6,PARS2,PITPNB,PGS1,NUBP1,NARS,RACGAP1,DHX33,YARS,MTG1,CCT7,RFC2,ORC5,AARS2,CLP1,QRSL1,ASCC3,HSPA14,DDX3X,NFS1,COQ6,RUVBL2,ACTR3…
protein C-terminus binding	GO:0008022	2.30058e-07	6.63816	234	2676	65	21090	NSF,PPP2CA,CLTC,BANF1,CDC37,MRE11A,MED12,RAD51,PABPC1,SNF8,ERCC4,PCNA,CDK7,TOP2A,ERCC2,XRCC6,POLR2A,YEATS4,LIG4,STIP1,TAF13,PHB,PHB2,ATP2A2,PEX12,SREBF2,PEX10,SARNP,ERCC3,NUMA1,SAE1,EP300,DYNLT1F,USP7,PEX5,SP1,NCL,DYNLT1B,PIAS4,TERF1,CDC20,XRCC4,MAD2L1,NIPBL,XRCC5,DYNLT1A,ID1,TBL1X,DYNLL1,PEX1,SUMO1,PQBP1,MSH2,PEX6,BRCA2,PPP1CC,UBE2I,TERF2,LAMA1,MAPK14,BLOC1S2,SCAF4,PEX16,MKI67,COIL
telomerase RNA binding	GO:0070034	2.57381e-07	6.58942	18	2676	14	21090	HNRNPU,DKC1,DHX36,NHP2,SNRPD3,HNRNPC,GAR1,NOP10,WRAP53,SNRPB,PINX1,SMG7,SMG5,NAF1
RNA polymerase II CTD heptapeptide repeat kinase activity	GO:0008353	2.57381e-07	6.58942	18	2676	14	21090	CDK7,ERCC2,MNAT1,GTF2H2,GTF2H3,BRD4,GTF2H1,ERCC3,CDK1,CDK9,CCNK,CCNH,GTF2H4,MAPK1
Ran GTPase binding	GO:0008536	2.68621e-07	6.57086	35	2676	20	21090	IPO13,IPO7,BIRC5,RCC1,TNPO3,NXT1,NUTF2,IPO4,RANBP1,KPNB1,RANGAP1,XPO1,CSE1L,IPO5,NUP153,TNPO1,RANBP3,IPO11,IPO9,XPO5
structural constituent of nuclear pore	GO:0017056	2.79269e-07	6.55398	26	2676	17	21090	NUP85,NUP88,NUTF2,NUP205,NUP93,NUP107,NUP214,NUP160,NUPL1,NUP153,TPR,NUP155,NUP62,NUP133,NDC1,NUP54,NUP98
exonuclease activity, active with either ribo- or deoxyribonucleic acids and producing 5'-phosphomonoesters	GO:0016796	4.38569e-07	6.35796	53	2676	25	21090	PNPT1,REXO2,RAD9A,MRE11A,APEX1,EXOSC10,DIS3,RAD1,POLE,DCLRE1B,POLD1,CNOT8,TOE1,PARN,PDE12,EXO1,DIS3L,USB1,APEX2,CNOT2,CNOT1,DCP2,XRN1,ISG20L2,XRN2
endoribonuclease activity	GO:0004521	5.54985e-07	6.25572	61	2676	27	21090	CPSF3,FEN1,DBR1,APEX1,MRPL44,POP4,RNASEH2A,RNASEH2B,RPP38,RPP30,RPP21,RPP14,DROSHA,POP5,YBEY,POP7,POP1,TSEN2,DICER1,RNASEK,RCL1,SND1,RNASEH1,TSEN34,DGCR8,NOB1,RNASET2A
prenyltransferase activity	GO:0004659	6.17483e-07	6.20937	14	2676	12	21090	RABGGTA,FDPS,RABGGTB,PTAR1,DHDDS,COX10,COQ2,FNTA,GGPS1,FNTB,NUS1,PGGT1B
nucleocytoplasmic carrier activity	GO:0140142	6.64463e-07	6.17753	30	2676	18	21090	SNUPN,NUPL2,NUTF2,IPO4,KPNB1,KPNA2,XPO1,NUP214,CSE1L,IPO5,TNPO1,XPO4,KPNA1,EIF4ENIF1,IPO11,IPO9,XPO5,KPNA6
signal sequence binding	GO:0005048	8.32994e-07	6.07936	47	2676	23	21090	BRAP,SEC61A1,IPO4,SRP68,KPNB1,KPNA2,NUP214,NOLC1,PEX5,NUPL1,IPO5,NUP153,SRP54B,TNPO1,SRP54A,PEX13,TIMM22,AP2M1,TOMM20,PEX7,KPNA1,KPNA6,NUP98
RNA polymerase II general transcription initiation factor activity	GO:0016251	8.63011e-07	6.06398	19	2676	14	21090	GTF2B,GTF2A1,GTF2E2,SNAPC5,GTF2F1,GTF2E1,TBP,GTF2H2,GTF2H3,GTF2A2,TAF5,TAF6,TAF7,GTF2H4
modification-dependent protein binding	GO:0140030	1.37689e-06	5.8611	207	2676	58	21090	KAT8,L3MBTL2,DNAJC2,KDM8,PWP1,YEATS4,SMARCA4,CXXC1,PSMD4,NCAPG2,BRD4,CHD8,PRPF8,WDR5,VCP,UHRF1,DAXX,MPHOSPH8,BPTF,HSPD1,WDR81,MTF2,SPRTN,ATRIP,BRD2,ING1,DPF2,MBTD1,TAF7,GM20809,MSH6,GM20815,GM20747,HGS,ING3,SPIN1,PHF8,CARM1,RBBP5,NCAPD3,TRIM24,NPLOC4,CDYL2,ING5,ATRX,ING4,CBX2,YEATS2,GM21637,SUZ12,GM20852,GM21943,CHD1,RNF168,SPIN2D,GM20816,GM20831,ING2
N-acyltransferase activity	GO:0016410	1.42965e-06	5.84477	119	2676	40	21090	KAT8,ELP3,SMARCE1,GTF2B,NCOA3,TADA1,KAT5,GTF3C4,NAT10,MEAF6,KANSL3,BRPF1,WDR5,NAA35,NAA20,EP300,MED24,ESCO2,OGT,MCRS1,NAA50,HAT1,DPF2,KAT7,HCFC1,NAA10,NAA25,NAA40,KANSL2,MCM3AP,TAF6L,ING3,BRCA2,NAT9,USP22,TADA3,TAF5L,SUPT3,NAA30,TADA2A
3'-5' exonuclease activity	GO:0008408	2.33407e-06	5.63189	49	2676	23	21090	PNPT1,REXO2,RAD9A,MRE11A,APEX1,EXOSC10,DIS3,POLG,RAD1,POLE,POLD1,CNOT8,TOE1,PARN,PDE12,DIS3L,USB1,APEX2,CNOT2,CNOT1,ERI1,ISG20L2,XRN2
transcription coactivator activity	GO:0003713	2.91486e-06	5.53538	264	2676	68	21090	POU5F1,MED20,MED12,NACA,APEX1,NCOA3,JMJD6,MMS19,TADA1,SMARCA4,PRPF6,WDR77,SLC30A9,RBPMS,KAT5,HINFP,TRIM28,MED21,GMEB2,ENY2,RARG,USP16,MED14,EP300,MED24,ZMIZ2,DAXX,RNF20,GTF2A2,HMGB2,RUVBL1,SMARCB1,MED16,ATXN7L3,HCFC1,NRIP1,BRCA1,TSG101,KDM1A,MED17,TAF7,RBM39,NPM1,FUS,CENPJ,TAF6L,ID1,DYRK1A,CARM1,TRIM24,CTBP2,MYCBP,TAF11,THRAP3,UBE3A,ING4,USP22,MED27,TADA3,RERE,TAF5L,KMT2D,SUPT3,ZMIZ1,DDX17,TADA2A…
endoribonuclease activity, producing 5'-phosphomonoesters	GO:0016891	3.17504e-06	5.49825	29	2676	17	21090	FEN1,DBR1,MRPL44,POP4,RNASEH2A,RNASEH2B,RPP38,RPP30,RPP21,RPP14,DROSHA,POP5,POP7,POP1,DICER1,RNASEH1,DGCR8
RNA polymerase II-specific DNA-binding transcription factor binding	GO:0061629	3.2572e-06	5.48716	292	2676	73	21090	IPO13,DDX5,MECR,NR0B1,HDAC1,MED12,SMARCE1,DCAF13,GTF2B,HDAC3,ACTB,APEX1,GTF2A1,NCOA3,PCNA,SIN3A,MMS19,PARP1,DDX54,DNAJA3,PSMA6,SMARCA4,PRPF6,SLC30A9,NANOG,STAT3,TBP,DNMT1,CTDP1,UBA3,MGA,RARG,MED30,SUMO2,EP300,MED24,DAXX,DMAP1,GTF2A2,MED4,SMARCB1,MED16,TAF6,SP1,TCERG1,RBPJ,BRMS1,RBBP8,NRIP1,C1D,KDM1A,MED17,TAF7,NPM1,FUS,DNAJA1,CHD4,MED25,NUP62,CNOT1,TRIM24,CTBP2,SUMO1,TAF11,LATS1,THRAP3,TADA3,KLF4…
DNA clamp loader activity	GO:0003689	4.29855e-06	5.36668	9	2676	9	21090	RFC2,RFC5,RFC4,RFC3,CHTF18,CHTF8,DSCC1,RAD17,RFC1
protein-DNA loading ATPase activity	GO:0033170	4.29855e-06	5.36668	9	2676	9	21090	RFC2,RFC5,RFC4,RFC3,CHTF18,CHTF8,DSCC1,RAD17,RFC1
telomeric DNA binding	GO:0042162	4.39644e-06	5.3569	36	2676	19	21090	TELO2,APEX1,TEN1,UPF1,XRCC6,SMG1,TINF2,RPA1,NCL,RPA2,HNRNPA1,TERF1,XRCC5,SMG7,SMG5,CTC1,UPF2,TERF2,ACD
single-stranded RNA binding	GO:0003727	4.51097e-06	5.34573	87	2676	32	21090	PNPT1,HNRNPU,PABPN1,DDX3X,SNRPC,PABPC1,JMJD6,EXOSC10,PPIE,RBPMS,HNRNPF,ILF3,SSB,DDX11,U2AF2,L1TD1,LONP1,HMGB1,POLR2G,MCRS1,HNRNPC,DDX1,EIF4A3,SUPT4A,RPS7,ZFR,LARP4,DAZAP1,CIRBP,KHDRBS1,LSM14A,SYNCRIP
RNA polymerase binding	GO:0070063	4.56203e-06	5.34084	62	2676	26	21090	HNRNPU,PABPN1,GTF2B,ELP2,RPRD1B,GTF2E1,CDC73,CTR9,PAF1,BRD4,WAC,RTF1,WDR43,RPAP2,ELOF1,ELP4,ANP32B,NOLC1,TCERG1,BRCA1,SUPT4A,RRN3,CCNT2,PCF11,SCAF4,CCNT1
single-stranded DNA helicase activity	GO:0017116	5.04966e-06	5.29674	18	2676	13	21090	RFC2,RAD51,MCM7,RFC5,RFC4,DNA2,RFC3,CHTF18,CHTF8,DSCC1,MCM6,POLQ,HELQ
snRNP binding	GO:0070990	5.29424e-06	5.2762	11	2676	10	21090	SNRPC,SNRPE,SNRPD2,SNRPG,SNRPD1,SNRPD3,SNRNP70,SNRPB2,SNRPB,PRPF31
threonine-type endopeptidase activity	GO:0004298	6.72098e-06	5.17257	21	2676	14	21090	PSMB6,PSMA1,PSMA6,PSMA5,PSMB1,PSMA3,PSMB4,PSMB7,PSMB3,PSMA4,PSMB2,PSMA7,PSMB5,TASP1
TBP-class protein binding	GO:0017025	6.72098e-06	5.17257	21	2676	14	21090	DR1,GTF2B,RUVBL2,NACA,GTF2A1,HNRNPF,PSMC5,PSMC1,GTF2A2,CAND1,RUVBL1,BRF1,PSMC2,YEATS2
DNA-binding transcription factor binding	GO:0140297	8.44012e-06	5.07365	372	2676	86	21090	IPO13,DDX5,MECR,NR0B1,HDAC1,DHX33,MED12,SMARCE1,DCAF13,GTF2B,HDAC3,ACTB,APEX1,GTF2A1,NCOA3,PCNA,SIN3A,MMS19,PARP1,DDX54,DNAJA3,PSMA6,SMARCA4,PRPF6,SLC30A9,KAT5,NANOG,STAT3,TBP,DNMT1,NCAPG2,CTDP1,UBA3,MGA,MYC,RARG,MED30,SUMO2,EP300,MED24,KPNA2,DAXX,DDX20,DMAP1,GTF2A2,MED4,SMARCB1,MED16,TAF6,SP1,TCERG1,RBPJ,BRMS1,RBBP8,HCFC1,NRIP1,C1D,KDM1A,SMAD2,MED17,EIF4E,TAF7,NPM1,FUS,DNAJA1,CHD4,PTMA,MED25,NUP…
mRNA 3'-UTR binding	GO:0003730	8.55232e-06	5.06792	89	2676	32	21090	HNRNPU,DDX5,CPSF1,RNF40,PABPC1,TARDBP,HNRNPK,RPL5,TUT1,ILF3,NUDT21,HNRNPL,CCT5,GEMIN5,DHX36,EXOSC8,UTP23,RNF20,RSL1D1,HNRNPC,ZFP36L1,EXOSC4,FUS,RPS7,DAZL,KHSRP,ELAVL1,DAZAP1,CIRBP,RNPS1,SERBP1,SECISBP2
protein dimerization activity	GO:0046983	8.59209e-06	5.0659	1038	2676	193	21090	HIST1H2AE,HIST1H2AN,RABGGTA,PPP2R1A,PRMT5,PPP2CA,DR1,NRBP1,TXN1,BANF1,RABGGTB,TIMM10,ATP1A1,G6PDX,NR0B1,HARS,MAX,TFRC,NARS,CENPA,RNF40,VPS25,NFS1,RUVBL2,SNRPC,PDSS1,BIRC5,GTF2A1,RCC1,HIST2H3C1,HIST1H4H,SNF8,HIST1H3F,NCOA3,TOP2A,LSM7,POLE3,HMGCS1,UBA2,RAN,SMC3,POLR2J,TRMT112,DNM1L,POLR1D,RBPMS,NADK2,KARS,TAF13,STAT3,NUDT21,RNF8,KIF20B,NRF1,HIST1H2BN,TAF8,E2F4,ECT2,HIST1H4N,GRPEL1,POLE4,POLR1C,UBA3…
transferase activity, transferring phosphorus-containing groups	GO:0016772	1.01377e-05	4.99406	988	2676	185	21090	OXSR1,PKMYT1,PNPT1,VRK1,ATP5A1,CTU1,NRBP1,IKBKAP,RIOK1,DPAGT1,STK11,MOCS3,POLRMT,CRCP,CDIPT,PGS1,CLP1,POLR3B,REV1,POLD2,AASDHPPT,POLR3F,GMPPB,POLA2,TAMM41,CDK7,DBF4,ERCC2,ATR,CHEK1,PGK1,DKC1,POLR2A,POLR2J,CDS2,DOLK,POLR3H,POLR3K,POLR1D,TUT1,POLR3A,POLR2I,FASTKD1,PI4KB,ATP5H,NADK2,SMG1,ATP5B,KARS,EIF2B3,POLG,PRIM1,MNAT1,ATP5C1,DTYMK,CSNK2B,POLE,TRIM28,GTF2H2,CSNK1A1,GTF2H3,POLR1C,POLR1B,BRD4,MASTL…
methylation-dependent protein binding	GO:0140034	1.09858e-05	4.95917	122	2676	39	21090	KAT8,L3MBTL2,KDM8,PWP1,CXXC1,NCAPG2,CHD8,WDR5,UHRF1,MPHOSPH8,BPTF,MTF2,ING1,DPF2,MBTD1,TAF7,GM20809,MSH6,GM20815,GM20747,ING3,SPIN1,PHF8,RBBP5,NCAPD3,CDYL2,ING5,ATRX,ING4,CBX2,GM21637,SUZ12,GM20852,GM21943,CHD1,SPIN2D,GM20816,GM20831,ING2
methylated histone binding	GO:0035064	1.09858e-05	4.95917	122	2676	39	21090	KAT8,L3MBTL2,KDM8,PWP1,CXXC1,NCAPG2,CHD8,WDR5,UHRF1,MPHOSPH8,BPTF,MTF2,ING1,DPF2,MBTD1,TAF7,GM20809,MSH6,GM20815,GM20747,ING3,SPIN1,PHF8,RBBP5,NCAPD3,CDYL2,ING5,ATRX,ING4,CBX2,GM21637,SUZ12,GM20852,GM21943,CHD1,SPIN2D,GM20816,GM20831,ING2
N-methyltransferase activity	GO:0008170	1.58172e-05	4.80087	91	2676	32	21090	NDUFAF7,WDR82,PRMT5,TFB1M,PRMT1,DIMT1,SETD5,SETDB1,CXXC1,KMT2B,WDR5,TFB2M,SETD2,METTL16,N6AMT1,EZH2,FAM103A1,EHMT2,EED,RNMT,SETD1A,FBL,CARM1,RBBP5,ASH2L,PRMT7,METTL15,EHMT1,SUZ12,KMT2D,NSD1,PRMT3
tRNA-specific ribonuclease activity	GO:0004549	1.73065e-05	4.76179	14	2676	11	21090	POP4,RPP38,RPP30,RPP21,RPP14,POP5,POP7,ELAC2,POP1,TSEN2,TSEN34
endonuclease activity, active with either ribo- or deoxyribonucleic acids and producing 5'-phosphomonoesters	GO:0016893	1.74478e-05	4.75826	42	2676	20	21090	FEN1,DBR1,MRPL44,POP4,RNASEH2A,RNASEH2B,DNA2,RPP38,RPP30,RPP21,RPP14,DROSHA,POP5,POP7,POP1,DICER1,EXO1,RNASEH1,DGCR8,SLX4
5S rRNA binding	GO:0008097	2.8117e-05	4.55103	12	2676	10	21090	EEF2,RPL5,RRS1,RPF2,RPL11,MRPL18,RPL7,RPL3,RPL4,MDM2
mRNA methyltransferase activity	GO:0008174	2.8117e-05	4.55103	12	2676	10	21090	METTL14,CMTR1,TRMT61A,METTL16,TRMT10C,CMTR2,NSUN2,FAM103A1,RNMT,METTL3
RNA polymerase core enzyme binding	GO:0043175	2.87301e-05	4.54166	43	2676	20	21090	HNRNPU,GTF2B,ELP2,RPRD1B,GTF2E1,CDC73,CTR9,PAF1,BRD4,WAC,RTF1,WDR43,RPAP2,ELOF1,ELP4,NOLC1,SUPT4A,RRN3,PCF11,SCAF4
3'-5' DNA helicase activity	GO:0043138	2.89668e-05	4.5381	17	2676	12	21090	ASCC3,GINS2,MCM2,MCM7,ERCC3,RUVBL1,RECQL4,FANCM,MCM6,BLM,MCM5,GINS4
nuclear hormone receptor binding	GO:0035257	3.12376e-05	4.50532	156	2676	45	21090	IPO13,DDX5,MECR,NR0B1,MED12,SMARCE1,DCAF13,GTF2B,NCOA3,PCNA,MMS19,PARP1,DDX54,SMARCA4,PRPF6,SLC30A9,STAT3,DNMT1,UBA3,RARG,MED30,SUMO2,EP300,MED24,DAXX,MED4,MED16,NRIP1,C1D,KDM1A,MED17,TAF7,FUS,MED25,NUP62,CNOT1,TRIM24,CTBP2,SUMO1,TAF11,LATS1,THRAP3,TADA3,NSD1,ARID1A
small ribosomal subunit rRNA binding	GO:0070181	3.39663e-05	4.46895	8	2676	8	21090	RPS3,NSUN4,RPS13,UTP23,MRPS6,RPS14,MRPS18C,CIRBP
DNA polymerase activity	GO:0034061	5.51249e-05	4.25865	30	2676	16	21090	REV1,POLD2,POLA2,DKC1,POLG,POLE,POLD1,POLG2,POLB,POLE2,POLQ,TERF1,POLD3,REV3L,TERF2,POLA1
translation initiation factor binding	GO:0031369	5.5998e-05	4.25183	37	2676	18	21090	ZPR1,EIF3F,DDX3X,RBX1,EIF5,EIF3C,RPS24,EIF2B4,EIF2B5,POLR2D,POLR2G,GLE1,EIF3B,RPS19,EIF4E,EIF3M,RPS3A1,EIF2S2
mRNA 5'-UTR binding	GO:0048027	7.79566e-05	4.10815	24	2676	14	21090	DDX3X,RPL5,CCT5,DHX36,RPS13,UTP23,GNL3,NCL,RPL26,RSL1D1,RPS14,RPS7,RPS3A1,SYNCRIP
double-stranded RNA binding	GO:0003725	8.10845e-05	4.09106	83	2676	29	21090	CLTC,HNRNPU,TFRC,DHX33,DDX3X,MRPL44,ILF2,ILF3,SUPV3L1,DHX36,DDX21,TUBA1B,DROSHA,EIF4A1,DHX15,HSPD1,DHX30,HMGB1,TUBB4B,DDX1,DICER1,HSP90AB1,PRKRIP1,SLC3A2,ELAVL1,ZFR,LSM14A,YRDC,DGCR8
H4 histone acetyltransferase activity	GO:0010485	8.26085e-05	4.08298	21	2676	13	21090	KAT8,KAT5,KANSL3,WDR5,OGT,MCRS1,NAA50,HAT1,HCFC1,NAA40,KANSL2,BRCA2,USP22
exoribonuclease activity, producing 5'-phosphomonoesters	GO:0016896	0.000100479	3.99792	31	2676	16	21090	PNPT1,REXO2,EXOSC10,DIS3,CNOT8,TOE1,PARN,PDE12,DIS3L,USB1,CNOT2,CNOT1,DCP2,XRN1,ISG20L2,XRN2
histone methyltransferase activity	GO:0042054	0.000170503	3.76827	55	2676	22	21090	WDR82,PRMT5,PRMT1,SETD5,SETDB1,CXXC1,KMT2B,WDR5,SETD2,EZH2,EHMT2,EED,SETD1A,FBL,CARM1,RBBP5,ASH2L,PRMT7,EHMT1,SUZ12,KMT2D,NSD1
exoribonuclease activity	GO:0004532	0.000177254	3.7514	32	2676	16	21090	PNPT1,REXO2,EXOSC10,DIS3,CNOT8,TOE1,PARN,PDE12,DIS3L,USB1,CNOT2,CNOT1,DCP2,XRN1,ISG20L2,XRN2
RNA polymerase II complex binding	GO:0000993	0.000217669	3.6622	36	2676	17	21090	HNRNPU,GTF2B,ELP2,RPRD1B,GTF2E1,CDC73,CTR9,PAF1,BRD4,WAC,RTF1,WDR43,ELOF1,ELP4,SUPT4A,PCF11,SCAF4
tubulin binding	GO:0015631	0.00023596	3.62716	340	2676	76	21090	TBCA,BCCIP,SBDS,HAUS4,UXT,LRPPRC,RACGAP1,DDX3X,OPA1,RAD51D,BIRC5,TBCD,KIF2C,TBCC,SMC3,DNM1L,KIF18A,KIF20B,SKA2,VBP1,TUBGCP5,HAUS7,MAPRE1,KIF11,CCT5,KIF23,NUMA1,RPS3,PLK1,TUBGCP4,NF1,ARL8B,KIF18B,SETD2,FNTA,CKAP5,TUBGCP2,DRG1,KATNA1,CAMSAP3,POLB,GAPDH,INO80,TERF1,TPR,DNM2,SPAG5,KATNB1,PRC1,CENPJ,ZFP207,TUBGCP3,DCTN1,SKA1,DYRK1A,VPS41,CEP350,VAPA,KIF4,BRCA2,HAUS8,B4GALT1,CENPE,KIF22,TUBGCP6,KIF15,B…
large ribosomal subunit rRNA binding	GO:0070180	0.000268307	3.57137	7	2676	7	21090	RPLP0,RPL12,MRPL11,RPL37A,RPL19,RPL23A,RPL23
U1 snRNP binding	GO:1990446	0.000271308	3.56654	9	2676	8	21090	SNRPC,SNRPE,SNRPD2,SNRPG,SNRPD1,SNRPD3,SNRNP70,SNRPB
DNA secondary structure binding	GO:0000217	0.000299206	3.52403	26	2676	14	21090	XRCC3,NR0B1,RAD51D,RAD51C,RECQL4,FANCM,HMGB1,XRCC2,RBBP8,BLM,MSH6,RAD51B,MSH2,YY1
threonine-type peptidase activity	GO:0070003	0.000299206	3.52403	26	2676	14	21090	PSMB6,PSMA1,PSMA6,PSMA5,PSMB1,PSMA3,PSMB4,PSMB7,PSMB3,PSMA4,PSMB2,PSMA7,PSMB5,TASP1
hormone receptor binding	GO:0051427	0.000384397	3.41522	185	2676	48	21090	IPO13,DDX5,MECR,NR0B1,MED12,SMARCE1,DCAF13,GTF2B,NCOA3,PCNA,MMS19,PARP1,DDX54,SMARCA4,PRPF6,SLC30A9,PSMC5,STAT3,DNMT1,UBA3,RARG,MED30,JAK1,SUMO2,EP300,MED24,DAXX,MED4,MED16,NRIP1,C1D,KDM1A,MED17,TAF7,PTPN11,FUS,MED25,NUP62,CNOT1,TRIM24,CTBP2,SUMO1,TAF11,LATS1,THRAP3,TADA3,NSD1,ARID1A
kinase regulator activity	GO:0019207	0.000395299	3.40307	196	2676	50	21090	BCCIP,ELP3,CDC37,STK11,DDX3X,QARS,KIDINS220,DBF4,INCENP,LAMTOR3,MNAT1,CSNK2B,RPLP1,FAM58B,MLST8,RPTOR,PIK3R2,PRKAR1A,DAXX,CCNA2,WDR81,ELP4,PIK3CA,WARS,HMGB1,SOCS3,HSP90AB1,PRKRIP1,IQGAP1,CCNH,NPM1,GCN1L1,SH3BP5L,FGFR1OP,CCNF,HEXIM1,CAB39,CCNE1,CKS2,VAC14,CCNL1,CCNT2,CCNL2,KLF4,CCND3,CCNG1,APC,CCNB1,PAK2,CCNT1
proton-transporting ATP synthase activity, rotational mechanism	GO:0046933	0.000407187	3.39021	20	2676	12	21090	ATP5A1,ATP5H,ATP5B,ATP5C1,ATP5J2,ATP5K,ATP5O,ATP5J,ATP5L,ATP5D,ATP5E,ATP6AP1
RNA methyltransferase activity	GO:0008173	0.000454703	3.34227	62	2676	23	21090	METTL14,CMTR1,TFB1M,NSUN3,TRMT61A,DIMT1,EMG1,TRMT112,TRMT5,FTSJ3,TFB2M,NSUN4,METTL16,TRMT10C,CMTR2,NSUN2,FAM103A1,RNMT,FBL,TGS1,METTL15,MEPCE,METTL3
DNA-directed DNA polymerase activity	GO:0003887	0.000698589	3.15578	24	2676	13	21090	REV1,POLD2,POLA2,POLG,POLE,POLD1,POLG2,POLB,POLE2,POLQ,POLD3,REV3L,POLA1
pyrophosphate hydrolysis-driven proton transmembrane transporter activity	GO:0009678	0.000821939	3.08516	35	2676	16	21090	ATP6V1A,ATP6V0C,ATP6V1G1,ATP5B,ATP6V0B,ATP2A2,ATP6V1E1,ATP6V0D1,ATP5L,ATP6V1C1,ATP6V1F,ATP6V1D,ATP5E,ATP6AP1,ATP4B,ATP6V1H
protein transporter activity	GO:0140318	0.000926417	3.03319	18	2676	11	21090	TIMM17A,TIMM10,TOMM22,SEC61A1,TIMM9,TIMM23,SEC63,TOMM40,SEC61G,TIMM22,TOMM20
RNA polymerase II general transcription initiation factor binding	GO:0001091	0.000926417	3.03319	18	2676	11	21090	HNRNPU,RUVBL2,ERCC4,TBP,NOP58,CTDP1,RUVBL1,ZNHIT6,TAF2,TAF7,FBL
U6 snRNA binding	GO:0017070	0.00120418	2.91931	10	2676	8	21090	RBM22,TUT1,PRPF8,METTL16,PRPF4,SART3,LSM3,EIF5A
ribonuclease P RNA binding	GO:0033204	0.00120418	2.91931	10	2676	8	21090	POP4,RPP38,RPP30,RPP21,RPP14,POP5,POP7,POP1
protein methyltransferase activity	GO:0008276	0.00146526	2.83409	89	2676	28	21090	NDUFAF7,WDR82,PRMT5,PRMT1,FAM98B,SETD5,SETDB1,TRMT112,CXXC1,KMT2B,WDR5,SETD2,N6AMT1,EZH2,EHMT2,EED,SETD1A,FBL,CARM1,RBBP5,ASH2L,PRMT7,EHMT1,SUZ12,KMT2D,ICMT,NSD1,PRMT3
3'-5'-exoribonuclease activity	GO:0000175	0.00165456	2.78132	29	2676	14	21090	PNPT1,REXO2,EXOSC10,DIS3,CNOT8,TOE1,PARN,PDE12,DIS3L,USB1,CNOT2,CNOT1,ISG20L2,XRN2
NADH dehydrogenase (ubiquinone) activity	GO:0008137	0.00165456	2.78132	29	2676	14	21090	NDUFS2,NDUFA2,NDUFS3,NDUFS7,NDUFS8,NDUFS1,NDUFB8,NDUFA13,NDUFB7,NDUFV2,NDUFA5,NDUFA10,NDUFB4,NDUFC2
NADH dehydrogenase (quinone) activity	GO:0050136	0.00165456	2.78132	29	2676	14	21090	NDUFS2,NDUFA2,NDUFS3,NDUFS7,NDUFS8,NDUFS1,NDUFB8,NDUFA13,NDUFB7,NDUFV2,NDUFA5,NDUFA10,NDUFB4,NDUFC2
protein kinase regulator activity	GO:0019887	0.00187859	2.72617	162	2676	42	21090	ELP3,CDC37,STK11,DDX3X,QARS,KIDINS220,DBF4,INCENP,MNAT1,CSNK2B,RPLP1,FAM58B,MLST8,RPTOR,PRKAR1A,DAXX,CCNA2,ELP4,PIK3CA,HMGB1,HSP90AB1,PRKRIP1,IQGAP1,CCNH,NPM1,GCN1L1,SH3BP5L,FGFR1OP,CCNF,HEXIM1,CAB39,CCNE1,CKS2,CCNL1,CCNT2,CCNL2,CCND3,CCNG1,APC,CCNB1,PAK2,CCNT1
microtubule minus-end binding	GO:0051011	0.00189698	2.72194	13	2676	9	21090	HAUS4,TUBGCP5,HAUS7,NUMA1,TUBGCP4,TUBGCP2,CAMSAP3,TUBGCP3,TUBGCP6
protein transmembrane transporter activity	GO:0008320	0.00189698	2.72194	13	2676	9	21090	TIMM17A,TOMM22,SEC61A1,TIMM23,SEC63,TOMM40,SEC61G,TIMM22,TOMM20
RNA polymerase I transcription regulatory region sequence-specific DNA binding	GO:0001163	0.00190869	2.71926	8	2676	7	21090	PIH1D1,SMARCA4,UBTF,TAF1C,SMARCB1,TAF1B,RRN3
RNA polymerase I core promoter sequence-specific DNA binding	GO:0001164	0.00190869	2.71926	8	2676	7	21090	PIH1D1,SMARCA4,UBTF,TAF1C,SMARCB1,TAF1B,RRN3
four-way junction DNA binding	GO:0000400	0.00194689	2.71066	19	2676	11	21090	XRCC3,RAD51D,RAD51C,FANCM,HMGB1,XRCC2,BLM,MSH6,RAD51B,MSH2,YY1
protein prenyltransferase activity	GO:0008318	0.00211872	2.67393	6	2676	6	21090	RABGGTA,RABGGTB,PTAR1,FNTA,FNTB,PGGT1B
nuclear localization sequence binding	GO:0008139	0.00227269	2.64346	26	2676	13	21090	BRAP,IPO4,KPNB1,KPNA2,NUP214,NOLC1,NUPL1,IPO5,NUP153,TNPO1,KPNA1,KPNA6,NUP98
p53 binding	GO:0002039	0.00239922	2.61993	72	2676	24	21090	PRMT5,STK11,HDAC1,TRIAP1,EEF2,RFWD3,SMARCA4,BRD4,CHD8,USP10,EP300,DAXX,RNF20,HSPD1,USP7,SMARCB1,YBX1,BLM,KDM1A,NPM1,EHMT2,MDM2,TRIM24,EHMT1
promoter-specific chromatin binding	GO:1990841	0.00250143	2.60181	63	2676	22	21090	L3MBTL2,HNRNPU,HDAC1,GTF2B,ERCC4,POLR2A,SETDB1,GTF2F1,DNMT1,TRIM28,E2F4,ERCC3,EP300,KDM1A,EZH2,NIPBL,EHMT2,PRDM15,KLF4,SUZ12,GLI2,NUP98
ion binding	GO:0043167	0.00263282	2.57958	6168	2676	881	21090	HMBS,OXSR1,PKMYT1,VRK1,EEFSEC,NDOR1,RABGGTA,FDPS,NSF,ATP5A1,VPS29,MTG2,NUBP2,GLRX5,ZPR1,CPSF3,CARS2,DOHH,GPN2,UBA1,NUBPL,PPP2CA,FEN1,SCO2,KAT8,NRBP1,DDX55,SKIV2L,ATP6V1A,MCM4,FANCL,IKBKAP,TUFM,ATP6V1B2,L3MBTL2,RIOK1,ELP3,TYMS,RTN4IP1,EIF2S3X,DDX49,ISCA2,RTEL1,RABGGTB,HNRNPU,XRCC3,TIMM10,ISCA1,SMC6,UROD,ATP1A1,DUT,NARS2,SMC5,PAICS,TXNRD2,SARS2,DPAGT1,BRAP,DDX5,RTCB,DARS,STK11,HARS,MOCS3,LETM1,SMC2…
DNA polymerase binding	GO:0070182	0.00382876	2.41694	20	2676	11	21090	RTEL1,RAD51,PCNA,SMARCA4,NAT10,CDT1,POLG2,LONP1,FANCD2,HSP90AB1,ACD
nuclear import signal receptor activity	GO:0061608	0.00382876	2.41694	20	2676	11	21090	SNUPN,NUTF2,IPO4,KPNB1,KPNA2,IPO5,TNPO1,KPNA1,IPO11,IPO9,KPNA6
ribonuclease P activity	GO:0004526	0.00392018	2.40669	11	2676	8	21090	POP4,RPP38,RPP30,RPP21,RPP14,POP5,POP7,POP1
ubiquitin-ubiquitin ligase activity	GO:0034450	0.00392018	2.40669	11	2676	8	21090	PRPF19,PPIL2,RBX1,ANAPC11,UBE4B,UBE2K,UBR5,UBOX5
NADH dehydrogenase activity	GO:0003954	0.00441332	2.35524	31	2676	14	21090	NDUFS2,NDUFA2,NDUFS3,NDUFS7,NDUFS8,NDUFS1,NDUFB8,NDUFA13,NDUFB7,NDUFV2,NDUFA5,NDUFA10,NDUFB4,NDUFC2
poly-purine tract binding	GO:0070717	0.00441332	2.35524	31	2676	14	21090	PNPT1,HNRNPU,PABPN1,DDX3X,PABPC1,PPIE,RBPMS,MCRS1,DDX1,EIF4A3,LARP4,DAZAP1,KHDRBS1,SYNCRIP
aminoacyl-tRNA editing activity	GO:0002161	0.00470989	2.32699	14	2676	9	21090	IARS,AARS2,LARS,VARS2,AARS,VARS,IARS2,LARS2,TARS2
histone-lysine N-methyltransferase activity	GO:0018024	0.00636448	2.19624	44	2676	17	21090	WDR82,SETD5,SETDB1,CXXC1,KMT2B,WDR5,SETD2,EZH2,EHMT2,EED,SETD1A,RBBP5,ASH2L,EHMT1,SUZ12,KMT2D,NSD1
electron transfer activity	GO:0009055	0.00683695	2.16514	76	2676	24	21090	GLRX5,TXNRD2,GLRX3,SDHA,COX7B,COX10,NDUFS1,COX6C,SDHB,AIFM1,COX5B,CYCS,UQCRFS1,FDX1L,FDX1,TXNRD1,UQCRQ,CYC1,ETFDH,DLD,SDHC,ETFA,COX7C,COX4I1
core promoter sequence-specific DNA binding	GO:0001046	0.00703378	2.15281	36	2676	15	21090	HDAC1,GTF2B,RUVBL2,PIH1D1,SMARCA4,UBTF,TBP,NRF1,TAF1C,H2AFZ,SMARCB1,EZH2,TAF1B,RRN3,POU2F1
ATPase-coupled cation transmembrane transporter activity	GO:0019829	0.00709958	2.14877	53	2676	19	21090	ATP6V1A,ATP1A1,ATP6V0C,ATP6V1G1,ATP5B,ATP6V0B,ATP2A2,ATP6V1E1,ATP6V0D1,ATP5L,ATP6V1C1,ATP2B1,ATP6V1F,ATP6V1D,CPOX,ATP5E,ATP6AP1,ATP4B,ATP6V1H
nuclear receptor binding	GO:0016922	0.00808481	2.09233	117	2676	32	21090	IPO13,DDX5,MECR,SMARCE1,DCAF13,NCOA3,PCNA,MMS19,PARP1,DDX54,SMARCA4,PRPF6,SLC30A9,STAT3,DNMT1,UBA3,RARG,SUMO2,EP300,DAXX,NRIP1,C1D,KDM1A,FUS,MED25,CNOT1,TRIM24,SUMO1,LATS1,TADA3,NSD1,ARID1A
thyroid hormone receptor binding	GO:0046966	0.00908839	2.04151	25	2676	12	21090	MED12,GTF2B,MED30,MED24,MED4,MED16,MED17,TAF7,FUS,NUP62,TAF11,THRAP3
ubiquitin-like protein binding	GO:0032182	0.00910953	2.0405	97	2676	28	21090	TOP2A,UBE2N,RAE1,BUB3,UBA2,RNF8,FAF2,USP16,DDI2,TDG,SPRTN,OTUB1,USP5,TSG101,USPL1,WDR48,MDM2,ADRM1,UBAP1,CKS2,NUP62,UBR5,NPLOC4,CASP8AP2,ASCC2,SERBP1,RNF168,FBXW7
proton-transporting ATPase activity, rotational mechanism	GO:0046961	0.012599	1.89966	22	2676	11	21090	ATP6V1A,ATP6V0C,ATP5B,ATP6V0B,ATP6V1E1,ATP6V0D1,ATP6V1C1,ATP6V1F,ATP6V1D,ATP6AP1,ATP6V1H
ATPase activity, coupled to transmembrane movement of ions, rotational mechanism	GO:0044769	0.012599	1.89966	22	2676	11	21090	ATP6V1A,ATP6V0C,ATP5B,ATP6V0B,ATP6V1E1,ATP6V0D1,ATP6V1C1,ATP6V1F,ATP6V1D,ATP6AP1,ATP6V1H
ATPase-coupled ion transmembrane transporter activity	GO:0042625	0.0130115	1.88567	55	2676	19	21090	ATP6V1A,ATP1A1,ATP6V0C,ATP6V1G1,ATP5B,ATP6V0B,ATP2A2,ATP6V1E1,ATP6V0D1,ATP5L,ATP6V1C1,ATP2B1,ATP6V1F,ATP6V1D,CPOX,ATP5E,ATP6AP1,ATP4B,ATP6V1H
ubiquitin-protein transferase inhibitor activity	GO:0055105	0.0132212	1.87873	7	2676	6	21090	RPL5,RPL11,GLMN,RPS7,RPL23,FBXO5
proton channel activity	GO:0015252	0.0149304	1.82593	26	2676	12	21090	ATP5A1,ATP5H,ATP5B,ATP5C1,ATP5J2,ATP5K,ATP5O,ATP5J,ATP5L,ATP5D,ATP5E,ATP6AP1
proton transmembrane transporter activity	GO:0015078	0.0158467	1.80006	126	2676	33	21090	ATP5A1,ATP6V1A,LETM1,ATP6V0C,COX7B,COX10,ATP6V1G1,ATP5H,ATP5B,ATP5C1,COX6C,ATP6V0B,ATP2A2,ATP5J2,COX5B,ATP5K,ATP6V1E1,ATP5O,ATP6V0D1,ATP5J,ATP5L,ATP5D,ATP6V1C1,ATP6V1F,SLC9A5,ATP6V1D,SLC9A1,COX7C,ATP5E,ATP6AP1,ATP4B,ATP6V1H,COX4I1
protein kinase binding	GO:0019901	0.0164616	1.78353	723	2676	129	21090	OXSR1,VRK1,NSF,RAD9A,ZPR1,PPP2CA,CLTC,ATP1A1,PRMT1,CDC37,TELO2,TFRC,VDAC1,RACGAP1,GLRX3,IGBP1,ACTB,QARS,EIF3A,KIDINS220,PCNA,TOP2A,SRSF1,LSM2,EEF2,PARP1,PIH1D1,RICTOR,PGAM1,DNAJA3,EEF1A1,ELP2,ADIPOR1,STAT3,SRSF5,CDC5L,GRB2,MAPRE1,KIF11,USP37,RBBP6,PTPN23,TGIF1,RPS3,RPTOR,BORA,PIK3R2,TPX2,RPS18,EP300,PRKAR1A,PLK1,STRIP1,PPM1D,DAXX,CDK9,RPS6,FNTA,DCTN2,AURKA,PARN,PPME1,CCNA2,TDG,PPP1CB,AATF,WARS,CO…
GPI-anchor transamidase activity	GO:0003923	0.0167253	1.77663	5	2676	5	21090	PIGU,PIGK,GPAA1,PIGT,PIGS
box H/ACA snoRNA binding	GO:0034513	0.0167253	1.77663	5	2676	5	21090	DKC1,NHP2,NOLC1,GAR1,NOP10
rRNA methyltransferase activity	GO:0008649	0.0168204	1.77416	19	2676	10	21090	TFB1M,DIMT1,EMG1,TRMT112,FTSJ3,TFB2M,NSUN4,METTL16,FBL,METTL15
catalytic activity, acting on a rRNA	GO:0140102	0.0168204	1.77416	19	2676	10	21090	TFB1M,DIMT1,EMG1,TRMT112,FTSJ3,TFB2M,NSUN4,METTL16,FBL,METTL15
transcription corepressor activity	GO:0003714	0.0208128	1.68167	189	2676	44	21090	DR1,HNRNPU,POU5F1,NR0B1,UXT,HDAC1,ZFP281,RUVBL2,HDAC3,SIN3A,DDX54,SMARCA4,NANOG,MYBBP1A,TRIM28,SCAI,DAXX,DMAP1,RYBP,TCERG1,RBBP8,DRAP1,PIAS4,NRIP1,C1D,TSG101,CBFA2T2,EZH2,CENPJ,CIR1,RBFOX2,TBL1X,TBL1XR1,BCOR,CTBP2,GMNN,CDYL2,ATF7IP,AJUBA,CASP8AP2,GON4L,RERE,HIRA,CITED2
macromolecule transmembrane transporter activity	GO:0022884	0.021173	1.67422	16	2676	9	21090	TIMM17A,TOMM22,SEC61A1,TIMM23,SEC63,TOMM40,SEC61G,TIMM22,TOMM20
ubiquitin binding	GO:0043130	0.0219731	1.65811	76	2676	23	21090	TOP2A,UBE2N,RAE1,BUB3,RNF8,FAF2,USP16,DDI2,SPRTN,OTUB1,USP5,TSG101,WDR48,MDM2,ADRM1,UBAP1,CKS2,NUP62,UBR5,NPLOC4,ASCC2,RNF168,FBXW7
histone acetyltransferase activity (H4-K8 specific)	GO:0043996	0.0226554	1.64483	10	2676	7	21090	KAT8,KANSL3,WDR5,OGT,MCRS1,HCFC1,KANSL2
nuclear export signal receptor activity	GO:0005049	0.0226554	1.64483	10	2676	7	21090	NUPL2,XPO1,NUP214,CSE1L,XPO4,EIF4ENIF1,XPO5
TFIID-class transcription factor complex binding	GO:0001094	0.0226554	1.64483	10	2676	7	21090	RUVBL2,ERCC4,NOP58,RUVBL1,ZNHIT6,TAF2,FBL
histone acetyltransferase activity (H4-K5 specific)	GO:0043995	0.0226554	1.64483	10	2676	7	21090	KAT8,KANSL3,WDR5,OGT,MCRS1,HCFC1,KANSL2
protein domain specific binding	GO:0019904	0.0227021	1.64393	795	2676	139	21090	NSF,RAD9A,PPP2CA,CLTC,BANF1,MRPL17,ATP1A1,DDX5,POU5F1,NR0B1,STK11,SKP1A,HDAC1,MED12,SRP72,IGBP1,ARF1,TUBB5,U2AF1,HIST1H4H,KIDINS220,NCOA3,SRSF1,HNRNPK,CHEK1,RAN,PPP1R2,DNM1L,RRM1,VPS11,DDB1,GTF2F1,CUL3,KEAP1,SRSF5,KIF20B,DNMT1,CSNK2B,SRSF7,TRIM28,E2F4,CDC5L,HIST1H4N,CTR9,GRB2,U2AF2,CHD8,TRA2B,SARNP,TUBA1A,HIST1H4M,NUMA1,VCP,SRP68,KPNB1,PRKAR1A,XPO1,NF2,HIST1H4B,DDX20,HIST1H4A,HMGB2,CCNA2,USP8,TDG…
2 iron, 2 sulfur cluster binding	GO:0051537	0.0237759	1.62386	27	2676	12	21090	GLRX5,ISCA2,ISCA1,ISCU,FXN,NDUFS1,SDHB,NDUFV2,UQCRFS1,FDX1L,FDX1,CISD1
chaperone binding	GO:0051087	0.0248899	1.60398	102	2676	28	21090	HSCB,TIMM10,ATP1A1,CDC37,TFRC,HSPA9,DLST,BIRC5,STIP1,TIMM44,PFDN6,OGDH,HSPE1,GRPEL1,TIMM9,HSPD1,DNAJA2,SOD1,WRAP53,HSPA8,SYVN1,DNAJA1,TSC1,GET4,HES1,DNAJB6,DNLZ,CDC25A
ubiquitin-like protein transferase activity	GO:0019787	0.0284452	1.54599	411	2676	80	21090	PRPF19,VHL,PPIL2,FANCL,BRAP,SKP1A,MED20,MED12,RNF40,RBX1,UBE2M,TRAIP,MED7,MED10,ANAPC11,UBE2N,ARIH1,RFWD3,CUL3,HUWE1,CDC16,TRIM71,RNF8,KCTD10,TRIM28,MED21,BIRC6,PEX12,MED30,RBBP6,UBE2G2,AURKAIP1,MED18,UBE4B,SUMO2,NSMCE1,UHRF1,MED24,ZMIZ2,UBE2K,UBE2C,RNF20,NOSIP,CDC27,NSMCE2,TRIM6,PIAS4,ZFP598,BRCA1,MUL1,BARD1,MED17,RABGEF1,SYVN1,MDM2,FBXL4,MED31,BCOR,UBR5,TRIM24,UBE2V1,PPP1R11,UBE2T,UBOX5,UBR4,UB…
ubiquitin-like protein ligase activity	GO:0061659	0.0307188	1.5126	269	2676	57	21090	PRPF19,VHL,PPIL2,FANCL,BRAP,SKP1A,MED20,MED12,RBX1,TRAIP,MED7,MED10,ANAPC11,ARIH1,RFWD3,CUL3,HUWE1,CDC16,TRIM71,RNF8,MED21,MED30,RBBP6,MED18,UBE4B,NSMCE1,UHRF1,MED24,ZMIZ2,UBE2K,NOSIP,CDC27,TRIM6,PIAS4,ZFP598,MUL1,MED17,RABGEF1,SYVN1,MDM2,MED31,UBR5,TRIM24,PPP1R11,UBOX5,UBR4,UBE3A,FBXW11,MED27,MED11,CUL1,CDC42,TOPORS,ZMIZ1,CBL,ANAPC5,FBXW7
microtubule binding	GO:0008017	0.0346613	1.46016	246	2676	53	21090	SBDS,HAUS4,RACGAP1,OPA1,BIRC5,KIF2C,DNM1L,KIF18A,KIF20B,SKA2,TUBGCP5,HAUS7,MAPRE1,KIF11,KIF23,NUMA1,RPS3,PLK1,TUBGCP4,NF1,KIF18B,FNTA,CKAP5,TUBGCP2,DRG1,KATNA1,CAMSAP3,POLB,GAPDH,TERF1,DNM2,SPAG5,KATNB1,PRC1,ZFP207,TUBGCP3,DCTN1,SKA1,VPS41,CEP350,VAPA,KIF4,HAUS8,CENPE,KIF22,TUBGCP6,KIF15,PAFAH1B1,APC,CLIP3,CEP57,KIF14,CNN3
poly(A) binding	GO:0008143	0.0349476	1.45658	24	2676	11	21090	HNRNPU,PABPN1,DDX3X,PABPC1,PPIE,RBPMS,DDX1,EIF4A3,LARP4,KHDRBS1,SYNCRIP
gamma-tubulin binding	GO:0043015	0.0368148	1.43398	28	2676	12	21090	RACGAP1,DDX3X,RAD51D,TUBGCP5,TUBGCP4,TUBGCP2,CENPJ,TUBGCP3,BRCA2,TUBGCP6,BLOC1S2,CEP57
ubiquitin-protein transferase activity	GO:0004842	0.0451605	1.34524	391	2676	76	21090	PRPF19,VHL,PPIL2,FANCL,BRAP,SKP1A,MED20,MED12,RNF40,RBX1,UBE2M,TRAIP,MED7,MED10,ANAPC11,UBE2N,ARIH1,RFWD3,CUL3,HUWE1,CDC16,TRIM71,RNF8,KCTD10,TRIM28,MED21,BIRC6,PEX12,MED30,RBBP6,UBE2G2,AURKAIP1,MED18,UBE4B,NSMCE1,UHRF1,MED24,UBE2K,UBE2C,RNF20,NOSIP,CDC27,NSMCE2,TRIM6,ZFP598,BRCA1,MUL1,BARD1,MED17,RABGEF1,SYVN1,MDM2,FBXL4,MED31,BCOR,UBR5,TRIM24,UBE2V1,PPP1R11,UBE2T,UBOX5,UBR4,UBE3A,UBE2I,FBXW11,M…
7S RNA binding	GO:0008312	0.0471588	1.32644	8	2676	6	21090	SRP72,SRP19,SRP9,SRP68,SRP54B,SRP54A
U1 snRNA binding	GO:0030619	0.0471588	1.32644	8	2676	6	21090	SNRPC,GEMIN5,PRPF8,SNRNP70,SNRPB2,COIL
phosphotransferase activity, phosphate group as acceptor	GO:0016776	0.0474758	1.32353	55	2676	18	21090	ATP5A1,ATP5H,ATP5B,ATP5C1,DTYMK,ATP5J2,GUK1,ATP5K,CMPK1,ATP5O,ATP5J,ATP5L,ATP5D,PNKP,AK2,IP6K1,ATP5E,ATP6AP1
ribosomal small subunit binding	GO:0043024	0.0499972	1.30105	14	2676	8	21090	DDX3X,DHX29,ABCE1,ERAL1,MTIF2,MTIF3,PTCD3,NPM1

## Sheet: SFigure1f_GOBP
term_name	term_id	adjusted_p_value	negative_log10_of_adjusted_p_value	term_size	query_size	intersection_size	effective_domain_size	intersections
cellular nitrogen compound metabolic process	GO:0034641	1.67657e-236	235.776	6099	2742	1554	21272	HSD17B10,HMBS,PNPT1,EEFSEC,HIST1H2AE,HIST1H2AN,PRPF19,REXO2,RAD9A,ATP5A1,METTL14,CTU1,MTG2,ZPR1,CPSF3,ELP5,CARS2,MRPL15,MRPL52,PRMT5,SEPSECS,PPP2CA,FEN1,VHL,GTF3C1,DPH5,BCCIP,THOC3,KAT8,DR1,TXN1,SKIV2L,CMTR1,MRPL36,MCM4,SNRNP35,FANCL,TFB1M,IKBKAP,TUFM,L3MBTL2,RIOK1,ELP3,TYMS,EIF2S3X,DDX49,BANF1,SBDS,MRPL17,EIF6,RTEL1,HNRNPU,XRCC3,SMC6,UROD,DUT,NARS2,ELP6,SMC5,PAICS,SARS2,DPAGT1,MAK16,SCAP,G6PDX,P…
cellular metabolic process	GO:0044237	3.4995e-194	193.456	10318	2742	2050	21272	HSD17B10,HMBS,OXSR1,PKMYT1,PNPT1,VRK1,EEFSEC,HIST1H2AE,NDOR1,HIST1H2AN,RABGGTA,PRPF19,FDPS,REXO2,NSF,RAD9A,ATP5A1,METTL14,CTU1,MTG2,NUBP2,PPP2R1A,GLRX5,ZPR1,CPSF3,ELP5,CARS2,NDUFAF7,DOHH,MRPL15,MRPL52,UBA1,WDR82,NUBPL,PRMT5,FAM96B,SEPSECS,HSCB,PPP2CA,CLTC,FEN1,SCO2,VHL,GTF3C1,NDUFA8,DPH5,BCCIP,CHMP6,THOC3,KAT8,DR1,PPIL2,NRBP1,TXN1,SKIV2L,CMTR1,MRPL36,MCM4,SNRNP35,FANCL,TFB1M,IKBKAP,TUFM,L3MBTL2,R…
RNA processing	GO:0006396	3.71172e-190	189.43	856	2742	463	21272	HSD17B10,PNPT1,PRPF19,METTL14,CTU1,ZPR1,CPSF3,ELP5,PRMT5,THOC3,CMTR1,SNRNP35,TFB1M,IKBKAP,RIOK1,ELP3,DDX49,SBDS,EIF6,HNRNPU,ELP6,MAK16,PABPN1,DDX5,RTCB,MOCS3,LSM8,CPSF1,NSUN3,NCBP1,RNPC3,CPSF2,SF3B4,TRMT61A,DBR1,CLASRP,AARS2,CLP1,GEMIN6,DPH3,RNF40,DCAF13,DDX3X,ESF1,AAR2,TRMU,SNRNP40,SNRPC,GTPBP3,TRUB2,DIMT1,ADAT3,U2AF1,SF1,FARS2,MRPL44,INTS3,DDX10,PABPC1,MRTO4,NCBP2,SF3A2,PRPF38A,BOP1,TARDBP,SSU7…
nucleic acid metabolic process	GO:0090304	5.24876e-177	176.28	4875	2742	1257	21272	HSD17B10,PNPT1,HIST1H2AE,HIST1H2AN,PRPF19,REXO2,RAD9A,METTL14,CTU1,ZPR1,CPSF3,ELP5,CARS2,PRMT5,SEPSECS,PPP2CA,FEN1,VHL,GTF3C1,BCCIP,THOC3,KAT8,DR1,TXN1,SKIV2L,CMTR1,MCM4,SNRNP35,FANCL,TFB1M,IKBKAP,L3MBTL2,RIOK1,ELP3,DDX49,BANF1,SBDS,EIF6,RTEL1,HNRNPU,XRCC3,SMC6,NARS2,ELP6,SMC5,SARS2,MAK16,SCAP,PABPN1,DDX5,POU5F1,RTCB,DARS,NR0B1,HARS,MOCS3,TELO2,POLRMT,DNAJC2,SMC2,LSM8,MAX,NELFB,TEFM,CRCP,MED26,IA…
nucleobase-containing compound metabolic process	GO:0006139	9.77493e-177	176.01	5340	2742	1331	21272	HSD17B10,PNPT1,HIST1H2AE,HIST1H2AN,PRPF19,REXO2,RAD9A,ATP5A1,METTL14,CTU1,ZPR1,CPSF3,ELP5,CARS2,PRMT5,SEPSECS,PPP2CA,FEN1,VHL,GTF3C1,BCCIP,THOC3,KAT8,DR1,TXN1,SKIV2L,CMTR1,MCM4,SNRNP35,FANCL,TFB1M,IKBKAP,L3MBTL2,RIOK1,ELP3,TYMS,DDX49,BANF1,SBDS,EIF6,RTEL1,HNRNPU,XRCC3,SMC6,DUT,NARS2,ELP6,SMC5,PAICS,SARS2,DPAGT1,MAK16,SCAP,G6PDX,PABPN1,DDX5,POU5F1,RTCB,DARS,NR0B1,HARS,MOCS3,TELO2,POLRMT,DNAJC2,SMC…
heterocycle metabolic process	GO:0046483	1.78727e-175	174.748	5476	2742	1350	21272	HSD17B10,HMBS,PNPT1,HIST1H2AE,HIST1H2AN,PRPF19,REXO2,RAD9A,ATP5A1,METTL14,CTU1,ZPR1,CPSF3,ELP5,CARS2,PRMT5,SEPSECS,PPP2CA,FEN1,VHL,GTF3C1,BCCIP,THOC3,KAT8,DR1,TXN1,SKIV2L,CMTR1,MCM4,SNRNP35,FANCL,TFB1M,IKBKAP,L3MBTL2,RIOK1,ELP3,TYMS,DDX49,BANF1,SBDS,EIF6,RTEL1,HNRNPU,XRCC3,SMC6,UROD,DUT,NARS2,ELP6,SMC5,PAICS,SARS2,DPAGT1,MAK16,SCAP,G6PDX,PABPN1,DDX5,POU5F1,RTCB,DARS,NR0B1,HARS,MOCS3,TELO2,POLRMT,…
cellular aromatic compound metabolic process	GO:0006725	5.61378e-169	168.251	5549	2742	1349	21272	HSD17B10,HMBS,PNPT1,HIST1H2AE,HIST1H2AN,PRPF19,REXO2,RAD9A,ATP5A1,METTL14,CTU1,ZPR1,CPSF3,ELP5,CARS2,PRMT5,SEPSECS,PPP2CA,FEN1,VHL,GTF3C1,BCCIP,THOC3,KAT8,DR1,TXN1,SKIV2L,CMTR1,MCM4,SNRNP35,FANCL,TFB1M,IKBKAP,L3MBTL2,RIOK1,ELP3,TYMS,DDX49,BANF1,SBDS,EIF6,RTEL1,HNRNPU,XRCC3,SMC6,UROD,DUT,NARS2,ELP6,SMC5,PAICS,SARS2,DPAGT1,MAK16,SCAP,G6PDX,PABPN1,DDX5,POU5F1,RTCB,DARS,NR0B1,HARS,MOCS3,TELO2,POLRMT,…
nitrogen compound metabolic process	GO:0006807	6.43343e-169	168.192	9681	2742	1925	21272	HSD17B10,HMBS,OXSR1,PKMYT1,PNPT1,VRK1,EEFSEC,HIST1H2AE,HIST1H2AN,RABGGTA,PRPF19,REXO2,NSF,RAD9A,ATP5A1,METTL14,CTU1,MTG2,PPP2R1A,GLRX5,ZPR1,CPSF3,ELP5,CARS2,NDUFAF7,DOHH,MRPL15,MRPL52,UBA1,WDR82,PRMT5,FAM96B,SEPSECS,HSCB,PPP2CA,CLTC,FEN1,VHL,GTF3C1,DPH5,BCCIP,CHMP6,THOC3,KAT8,DR1,PPIL2,NRBP1,TXN1,SKIV2L,CMTR1,MRPL36,MCM4,SNRNP35,FANCL,TFB1M,IKBKAP,TUFM,L3MBTL2,RIOK1,ELP3,TYMS,EIF2S3X,DDX49,BANF1,…
macromolecule metabolic process	GO:0043170	3.02065e-163	162.52	9468	2742	1887	21272	HSD17B10,HMBS,OXSR1,PKMYT1,PNPT1,VRK1,EEFSEC,HIST1H2AE,HIST1H2AN,RABGGTA,PRPF19,REXO2,NSF,RAD9A,METTL14,CTU1,MTG2,PPP2R1A,GLRX5,ZPR1,CPSF3,ELP5,CARS2,NDUFAF7,DOHH,MRPL15,MRPL52,UBA1,WDR82,PRMT5,FAM96B,SEPSECS,HSCB,PPP2CA,CLTC,FEN1,VHL,GTF3C1,DPH5,BCCIP,CHMP6,THOC3,KAT8,DR1,PPIL2,NRBP1,TXN1,SKIV2L,CMTR1,MRPL36,MCM4,SNRNP35,FANCL,TFB1M,IKBKAP,TUFM,L3MBTL2,RIOK1,ELP3,TYMS,EIF2S3X,DDX49,BANF1,ISCA2,S…
organic cyclic compound metabolic process	GO:1901360	2.24892e-162	161.648	5749	2742	1367	21272	HSD17B10,HMBS,PNPT1,HIST1H2AE,HIST1H2AN,PRPF19,FDPS,REXO2,RAD9A,ATP5A1,METTL14,CTU1,ZPR1,CPSF3,ELP5,CARS2,PRMT5,SEPSECS,PPP2CA,FEN1,VHL,GTF3C1,BCCIP,THOC3,KAT8,DR1,TXN1,SKIV2L,CMTR1,MCM4,SNRNP35,FANCL,TFB1M,IKBKAP,L3MBTL2,RIOK1,ELP3,TYMS,DDX49,BANF1,SBDS,EIF6,RTEL1,HNRNPU,XRCC3,SMC6,UROD,ATP1A1,DUT,NARS2,ELP6,SMC5,PAICS,SARS2,DPAGT1,MAK16,SCAP,G6PDX,PABPN1,DDX5,POU5F1,RTCB,DARS,NR0B1,HARS,MOCS3,T…
gene expression	GO:0010467	1.26101e-160	159.899	5752	2742	1364	21272	HSD17B10,PNPT1,EEFSEC,HIST1H2AE,HIST1H2AN,PRPF19,METTL14,CTU1,MTG2,GLRX5,ZPR1,CPSF3,ELP5,CARS2,DOHH,MRPL15,MRPL52,PRMT5,FAM96B,SEPSECS,HSCB,PPP2CA,VHL,GTF3C1,DPH5,THOC3,KAT8,DR1,TXN1,SKIV2L,CMTR1,MRPL36,SNRNP35,TFB1M,IKBKAP,TUFM,L3MBTL2,RIOK1,ELP3,TYMS,EIF2S3X,DDX49,ISCA2,SBDS,MRPL17,EIF6,HNRNPU,TIMM17A,ISCA1,NARS2,ELP6,SARS2,MAK16,SCAP,G6PDX,PABPN1,DDX5,CDC37,POU5F1,RTCB,DARS,NR0B1,HARS,MOCS3,PO…
primary metabolic process	GO:0044238	4.22782e-155	154.374	10240	2742	1967	21272	HSD17B10,HMBS,OXSR1,PKMYT1,PNPT1,VRK1,EEFSEC,HIST1H2AE,HIST1H2AN,RABGGTA,PRPF19,FDPS,REXO2,NSF,RAD9A,ATP5A1,METTL14,CTU1,MTG2,PPP2R1A,GLRX5,ZPR1,CPSF3,ELP5,CARS2,NDUFAF7,DOHH,MRPL15,MRPL52,UBA1,WDR82,PRMT5,FAM96B,SEPSECS,HSCB,PPP2CA,CLTC,FEN1,VHL,GTF3C1,DPH5,BCCIP,CHMP6,THOC3,KAT8,DR1,PPIL2,NRBP1,TXN1,SKIV2L,CMTR1,MRPL36,MCM4,SNRNP35,FANCL,TFB1M,IKBKAP,TUFM,L3MBTL2,RIOK1,ELP3,TYMS,EIF2S3X,DDX49,B…
metabolic process	GO:0008152	5.54125e-155	154.256	11496	2742	2116	21272	HSD17B10,HMBS,OXSR1,PKMYT1,PNPT1,VRK1,EEFSEC,HIST1H2AE,NDOR1,HIST1H2AN,RABGGTA,PRPF19,FDPS,REXO2,NSF,RAD9A,ATP5A1,METTL14,CTU1,MTG2,NUBP2,PPP2R1A,GLRX5,ZPR1,CPSF3,ELP5,CARS2,NDUFAF7,DOHH,MRPL15,MRPL52,UBA1,WDR82,NUBPL,PRMT5,FAM96B,SEPSECS,HSCB,PPP2CA,CLTC,FEN1,SCO2,VHL,GTF3C1,NDUFA8,DPH5,BCCIP,CHMP6,THOC3,KAT8,DR1,PPIL2,NRBP1,TXN1,SKIV2L,CMTR1,ATP6V1A,MRPL36,MCM4,SNRNP35,FANCL,TFB1M,IKBKAP,TUFM,N…
ribonucleoprotein complex biogenesis	GO:0022613	7.85358e-152	151.105	407	2742	281	21272	PRPF19,PRMT5,MRPL36,TFB1M,RIOK1,PAK1IP1,EIF2S3X,DDX49,SBDS,EIF6,MAK16,RPLP0,NSUN3,NCBP1,EIF3F,CLP1,GEMIN6,DCAF13,DDX3X,RUVBL2,ESF1,AAR2,SNRPC,DHX29,DIMT1,RSL24D1,EIF3K,EIF3D,DDX10,MRTO4,SF3A2,BOP1,EIF3A,POP4,WDR12,SRSF1,LSM2,PDCD11,NOL10,ABCE1,ERCC2,MRPS2,EXOSC10,ATR,UTP15,DDX54,PIH1D1,NLE1,NUP88,MDN1,EMG1,RPL10,WDR18,RPL12,DKC1,DDX28,PWP1,RAN,DIS3,DDX47,EXOSC3,TRMT112,ERAL1,EIF5,EIF3C,DDX18,PRPF…
organic substance metabolic process	GO:0071704	1.48294e-141	140.829	10940	2742	2024	21272	HSD17B10,HMBS,OXSR1,PKMYT1,PNPT1,VRK1,EEFSEC,HIST1H2AE,HIST1H2AN,RABGGTA,PRPF19,FDPS,REXO2,NSF,RAD9A,ATP5A1,METTL14,CTU1,MTG2,PPP2R1A,GLRX5,ZPR1,CPSF3,ELP5,CARS2,NDUFAF7,DOHH,MRPL15,MRPL52,UBA1,WDR82,PRMT5,FAM96B,SEPSECS,HSCB,PPP2CA,CLTC,FEN1,VHL,GTF3C1,DPH5,BCCIP,CHMP6,THOC3,KAT8,DR1,PPIL2,NRBP1,TXN1,SKIV2L,CMTR1,MRPL36,MCM4,SNRNP35,FANCL,TFB1M,IKBKAP,TUFM,L3MBTL2,RIOK1,ELP3,TYMS,EIF2S3X,DDX49,B…
RNA metabolic process	GO:0016070	1.90388e-131	130.72	4390	2742	1089	21272	HSD17B10,PNPT1,HIST1H2AE,HIST1H2AN,PRPF19,REXO2,METTL14,CTU1,ZPR1,CPSF3,ELP5,CARS2,PRMT5,SEPSECS,PPP2CA,FEN1,VHL,GTF3C1,THOC3,KAT8,DR1,TXN1,SKIV2L,CMTR1,SNRNP35,TFB1M,IKBKAP,L3MBTL2,RIOK1,ELP3,DDX49,SBDS,EIF6,HNRNPU,NARS2,ELP6,SARS2,MAK16,SCAP,PABPN1,DDX5,POU5F1,RTCB,DARS,NR0B1,HARS,MOCS3,POLRMT,DNAJC2,LSM8,MAX,NELFB,TEFM,CRCP,MED26,IARS,TFRC,MED20,CPSF1,PARS2,UXT,NSUN3,NCBP1,HDAC1,LRPPRC,RNPC3,C…
chromosome organization	GO:0051276	3.65366e-127	126.437	1168	2742	470	21272	VRK1,HIST1H2AE,HIST1H2AN,PPP2R1A,WDR82,PRMT5,FEN1,CHMP6,KAT8,DR1,MCM4,L3MBTL2,BANF1,RTEL1,HNRNPU,XRCC3,SMC6,SMC5,PRMT1,POU5F1,RBBP4,TELO2,DNAJC2,SMC2,SKP1A,GRWD1,MRE11A,RAD50,HDAC1,ITPA,RACGAP1,SMARCC1,SMARCE1,CENPA,CCT7,RFC2,ASCC3,RNF40,CTCF,GTF2B,DDX3X,VPS72,RUVBL2,GINS2,CENPN,ZW10,MCM2,HDAC3,CCT2,SSBP1,RAD51D,KDM8,TCP1,RAD51,APEX1,BIRC5,TEN1,SETD5,PCID2,MCM7,PELO,HIST2H3C1,HIST1H4H,ERCC4,KIF2C…
translation	GO:0006412	2.66193e-126	125.575	636	2742	331	21272	EEFSEC,METTL14,MTG2,CARS2,MRPL15,MRPL52,SEPSECS,DPH5,MRPL36,TUFM,TYMS,EIF2S3X,MRPL17,EIF6,NARS2,SARS2,DARS,HARS,METTL17,EIF1AD,IARS,RPLP0,DPH6,MRPL55,PARS2,NSUN3,DPH2,NCBP1,LRPPRC,NARS,DHX33,MRPS16,YARS,MTG1,EIF3F,AARS2,DPH3,QRSL1,HSPA14,DDX3X,TARS,MRPL43,TSFM,MARS2,MRPL12,TRUB2,MRPL27,DHX29,LARS,GFM1,RSL24D1,MRPS21,EIF3K,FARS2,MRPL44,EIF3D,QARS,NCBP2,EIF2B1,TARDBP,EIF3A,RARS2,DHFR,MRPL39,EEF2,AB…
cellular macromolecule metabolic process	GO:0044260	1.24636e-121	120.904	7980	2742	1601	21272	HSD17B10,HMBS,OXSR1,PKMYT1,PNPT1,VRK1,EEFSEC,HIST1H2AE,HIST1H2AN,RABGGTA,PRPF19,NSF,RAD9A,METTL14,CTU1,MTG2,PPP2R1A,GLRX5,ZPR1,CARS2,NDUFAF7,DOHH,MRPL15,MRPL52,UBA1,WDR82,PRMT5,SEPSECS,PPP2CA,CLTC,FEN1,VHL,GTF3C1,DPH5,BCCIP,CHMP6,KAT8,DR1,PPIL2,NRBP1,TXN1,SKIV2L,CMTR1,MRPL36,MCM4,FANCL,TFB1M,IKBKAP,TUFM,L3MBTL2,RIOK1,ELP3,TYMS,EIF2S3X,DDX49,BANF1,MRPL17,EIF6,RTEL1,RABGGTB,HNRNPU,TIMM17A,XRCC3,SMC…
cellular macromolecule biosynthetic process	GO:0034645	3.43149e-121	120.465	4623	2742	1105	21272	EEFSEC,HIST1H2AE,HIST1H2AN,METTL14,MTG2,ZPR1,CARS2,MRPL15,MRPL52,PRMT5,SEPSECS,PPP2CA,FEN1,VHL,GTF3C1,DPH5,KAT8,DR1,TXN1,MRPL36,MCM4,TUFM,L3MBTL2,ELP3,TYMS,EIF2S3X,MRPL17,EIF6,RTEL1,HNRNPU,NARS2,SARS2,DPAGT1,SCAP,PRMT1,DDX5,ALG13,POU5F1,RBBP4,DARS,NR0B1,HARS,TELO2,POLRMT,DNAJC2,METTL17,EIF1AD,GRWD1,MAX,NELFB,TEFM,CRCP,MED26,IARS,RPLP0,TFRC,DPH6,MRE11A,MED20,MRPL55,PARS2,UXT,NSUN3,DPH2,NCBP1,HDAC1…
peptide biosynthetic process	GO:0043043	3.8196e-121	120.418	656	2742	331	21272	EEFSEC,METTL14,MTG2,CARS2,MRPL15,MRPL52,SEPSECS,DPH5,MRPL36,TUFM,TYMS,EIF2S3X,MRPL17,EIF6,NARS2,SARS2,DARS,HARS,METTL17,EIF1AD,IARS,RPLP0,DPH6,MRPL55,PARS2,NSUN3,DPH2,NCBP1,LRPPRC,NARS,DHX33,MRPS16,YARS,MTG1,EIF3F,AARS2,DPH3,QRSL1,HSPA14,DDX3X,TARS,MRPL43,TSFM,MARS2,MRPL12,TRUB2,MRPL27,DHX29,LARS,GFM1,RSL24D1,MRPS21,EIF3K,FARS2,MRPL44,EIF3D,QARS,NCBP2,EIF2B1,TARDBP,EIF3A,RARS2,DHFR,MRPL39,EEF2,AB…
ribosome biogenesis	GO:0042254	1.2735e-120	119.895	284	2742	209	21272	MRPL36,TFB1M,RIOK1,PAK1IP1,DDX49,SBDS,EIF6,MAK16,RPLP0,NSUN3,DCAF13,DDX3X,ESF1,DHX29,DIMT1,RSL24D1,DDX10,MRTO4,BOP1,POP4,WDR12,PDCD11,NOL10,ABCE1,ERCC2,MRPS2,EXOSC10,UTP15,DDX54,PIH1D1,NLE1,NUP88,MDN1,EMG1,RPL10,WDR18,RPL12,DKC1,DDX28,PWP1,RAN,DIS3,DDX47,EXOSC3,TRMT112,ERAL1,DDX18,RPL5,RRS1,NOP14,WDR36,WDR3,RRP7A,WDR75,PPAN,KRR1,RPL14,FTSJ3,MRPL11,RPS2,GNL2,SDAD1,HEATR3,EXOSC2,RPF2,RPS24,RPS16,MY…
ncRNA metabolic process	GO:0034660	6.80496e-119	118.167	436	2742	262	21272	HSD17B10,PNPT1,CTU1,ELP5,CARS2,SEPSECS,TFB1M,IKBKAP,RIOK1,ELP3,DDX49,SBDS,EIF6,NARS2,ELP6,SARS2,MAK16,RTCB,DARS,HARS,MOCS3,IARS,PARS2,NSUN3,NARS,TRMT61A,YARS,AARS2,CLP1,DPH3,QRSL1,DCAF13,DDX3X,ESF1,TRMU,TARS,GTPBP3,MARS2,TRUB2,DIMT1,ADAT3,LARS,FARS2,MRPL44,INTS3,PELO,QARS,DDX10,MRTO4,BOP1,RARS2,POP4,WDR12,PDCD11,NOL10,ZBTB8OS,MTO1,GATB,ERCC2,EXOSC10,UTP15,DDX54,PIH1D1,VARS2,MDN1,EMG1,WDR18,DKC1,D…
macromolecule biosynthetic process	GO:0009059	1.53934e-118	117.813	4766	2742	1122	21272	EEFSEC,HIST1H2AE,HIST1H2AN,METTL14,MTG2,ZPR1,CARS2,MRPL15,MRPL52,PRMT5,SEPSECS,PPP2CA,CLTC,FEN1,VHL,GTF3C1,DPH5,KAT8,DR1,TXN1,MRPL36,MCM4,TUFM,L3MBTL2,ELP3,TYMS,EIF2S3X,MRPL17,EIF6,RTEL1,HNRNPU,NARS2,SARS2,DPAGT1,SCAP,PRMT1,DDX5,ALG13,POU5F1,RBBP4,DARS,NR0B1,HARS,TELO2,POLRMT,DNAJC2,METTL17,EIF1AD,GRWD1,MAX,NELFB,TEFM,CRCP,MED26,IARS,RPLP0,TFRC,DPH6,MRE11A,MED20,MRPL55,PARS2,UXT,NSUN3,DPH2,NCBP1,…
cellular component organization or biogenesis	GO:0071840	2.66965e-117	116.574	6069	2742	1319	21272	HSD17B10,PNPT1,VRK1,HIST1H2AE,NDOR1,HIST1H2AN,RABGGTA,PRPF19,FDPS,NSF,NUBP2,PPP2R1A,ZPR1,NDUFAF7,MRPL15,WDR82,NUBPL,PRMT5,FAM96B,TBCA,HSCB,CLTC,FEN1,SCO2,VHL,NDUFA8,BCCIP,CHMP6,KAT8,DR1,WDR73,CLUH,MRPL36,MCM4,TFB1M,NDUFA3,L3MBTL2,RIOK1,PAK1IP1,EIF2S3X,DDX49,BANF1,ISCA2,SBDS,MRPL17,EIF6,RTEL1,RABGGTB,HNRNPU,TIMM17A,XRCC3,TMEM11,TIMM10,ISCA1,SMC6,TIMM50,DUT,SMC5,MAK16,G6PDX,PRMT1,PET117,CDC37,POU5F…
organelle organization	GO:0006996	3.5677e-116	115.448	3681	2742	939	21272	HSD17B10,PNPT1,VRK1,HIST1H2AE,HIST1H2AN,PPP2R1A,ZPR1,NDUFAF7,MRPL15,WDR82,NUBPL,PRMT5,CLTC,FEN1,SCO2,NDUFA8,BCCIP,CHMP6,KAT8,DR1,WDR73,CLUH,MCM4,NDUFA3,L3MBTL2,BANF1,SBDS,MRPL17,EIF6,RTEL1,HNRNPU,TIMM17A,XRCC3,TMEM11,TIMM10,SMC6,TIMM50,SMC5,PRMT1,PET117,CDC37,POU5F1,RBBP4,TELO2,DNAJC2,LETM1,SMC2,SKP1A,GRWD1,ATAD3A,HSPA4,RPLP0,MRE11A,RAD50,HAUS4,UXT,NUBP1,HDAC1,ITPA,VDAC1,RACGAP1,SMARCC1,TRIAP1,AT…
cellular biosynthetic process	GO:0044249	5.45378e-114	113.263	5587	2742	1239	21272	HMBS,EEFSEC,HIST1H2AE,HIST1H2AN,FDPS,ATP5A1,METTL14,MTG2,ZPR1,CARS2,MRPL15,MRPL52,PRMT5,SEPSECS,PPP2CA,CLTC,FEN1,VHL,GTF3C1,DPH5,KAT8,DR1,TXN1,MRPL36,MCM4,TUFM,L3MBTL2,ELP3,TYMS,EIF2S3X,MRPL17,EIF6,RTEL1,HNRNPU,UROD,ATP1A1,DUT,NARS2,PAICS,SARS2,DPAGT1,SCAP,G6PDX,PRMT1,DDX5,ALG13,MECR,POU5F1,RBBP4,DARS,NR0B1,STK11,HARS,MOCS3,TELO2,POLRMT,DNAJC2,METTL17,EIF1AD,GRWD1,MAX,NELFB,TEFM,CRCP,MED26,IARS,C…
organic substance biosynthetic process	GO:1901576	2.99746e-111	110.523	5689	2742	1248	21272	HMBS,EEFSEC,HIST1H2AE,HIST1H2AN,PRPF19,FDPS,ATP5A1,METTL14,MTG2,ZPR1,CARS2,MRPL15,MRPL52,PRMT5,SEPSECS,PPP2CA,CLTC,FEN1,VHL,GTF3C1,DPH5,KAT8,DR1,TXN1,MRPL36,MCM4,TUFM,L3MBTL2,ELP3,TYMS,EIF2S3X,MRPL17,EIF6,RTEL1,HNRNPU,UROD,ATP1A1,DUT,NARS2,PAICS,SARS2,DPAGT1,SCAP,G6PDX,PRMT1,DDX5,ALG13,MECR,POU5F1,RBBP4,DARS,NR0B1,STK11,HARS,MOCS3,TELO2,POLRMT,DNAJC2,METTL17,EIF1AD,GRWD1,MAX,NELFB,TEFM,CRCP,MED26…
biosynthetic process	GO:0009058	3.94776e-108	107.404	5785	2742	1255	21272	HMBS,EEFSEC,HIST1H2AE,HIST1H2AN,PRPF19,FDPS,ATP5A1,METTL14,MTG2,ZPR1,CARS2,DOHH,MRPL15,MRPL52,PRMT5,SEPSECS,PPP2CA,CLTC,FEN1,VHL,GTF3C1,DPH5,KAT8,DR1,TXN1,MRPL36,MCM4,TUFM,L3MBTL2,ELP3,TYMS,EIF2S3X,MRPL17,EIF6,RTEL1,HNRNPU,UROD,ATP1A1,DUT,NARS2,PAICS,SARS2,DPAGT1,SCAP,G6PDX,PRMT1,DDX5,ALG13,MECR,POU5F1,RBBP4,DARS,NR0B1,STK11,HARS,MOCS3,TELO2,POLRMT,DNAJC2,METTL17,EIF1AD,GRWD1,MAX,NELFB,TEFM,CRCP,…
cellular nitrogen compound biosynthetic process	GO:0044271	9.35491e-106	105.029	4608	2742	1068	21272	HMBS,EEFSEC,HIST1H2AE,HIST1H2AN,ATP5A1,METTL14,MTG2,ZPR1,CARS2,MRPL15,MRPL52,PRMT5,SEPSECS,PPP2CA,VHL,GTF3C1,DPH5,KAT8,DR1,TXN1,MRPL36,TUFM,L3MBTL2,ELP3,TYMS,EIF2S3X,MRPL17,EIF6,HNRNPU,UROD,DUT,NARS2,PAICS,SARS2,SCAP,G6PDX,DDX5,POU5F1,DARS,NR0B1,HARS,TELO2,POLRMT,DNAJC2,METTL17,EIF1AD,MAX,NELFB,TEFM,CRCP,MED26,IARS,RPLP0,TFRC,DPH6,MED20,MRPL55,PARS2,PPOX,UXT,NSUN3,DPH2,NCBP1,HDAC1,ITPA,LRPPRC,NAR…
amide biosynthetic process	GO:0043604	5.58907e-103	102.253	771	2742	340	21272	EEFSEC,METTL14,MTG2,CARS2,MRPL15,MRPL52,SEPSECS,DPH5,MRPL36,TUFM,TYMS,EIF2S3X,MRPL17,EIF6,NARS2,SARS2,DARS,HARS,METTL17,EIF1AD,IARS,RPLP0,DPH6,MRPL55,PARS2,NSUN3,DPH2,NCBP1,LRPPRC,NARS,DHX33,MRPS16,YARS,MTG1,EIF3F,AARS2,DPH3,QRSL1,HSPA14,DDX3X,TARS,MRPL43,TSFM,MARS2,MRPL12,TRUB2,MRPL27,DHX29,LARS,GFM1,RSL24D1,MRPS21,EIF3K,FARS2,MRPL44,EIF3D,QARS,NCBP2,EIF2B1,TARDBP,EIF3A,RARS2,DHFR,MRPL39,EEF2,AB…
ncRNA processing	GO:0034470	2.84849e-102	101.545	348	2742	217	21272	HSD17B10,CTU1,ELP5,TFB1M,IKBKAP,RIOK1,ELP3,DDX49,SBDS,EIF6,ELP6,MAK16,RTCB,MOCS3,NSUN3,TRMT61A,AARS2,CLP1,DPH3,DCAF13,DDX3X,ESF1,TRMU,GTPBP3,TRUB2,DIMT1,ADAT3,FARS2,MRPL44,INTS3,DDX10,MRTO4,BOP1,POP4,WDR12,PDCD11,NOL10,ZBTB8OS,MTO1,ERCC2,EXOSC10,UTP15,DDX54,PIH1D1,MDN1,EMG1,WDR18,DKC1,DIS3,DDX47,EXOSC3,TRMT112,INTS8,ELP2,RPUSD4,AARS,POLR3K,DDX18,RPL5,TUT1,RRS1,NOP14,WDR36,WDR3,RRP7A,TRIT1,WDR75,K…
mRNA metabolic process	GO:0016071	2.2456e-100	99.6487	650	2742	305	21272	PNPT1,PRPF19,METTL14,ZPR1,CPSF3,PRMT5,THOC3,SKIV2L,CMTR1,SNRNP35,HNRNPU,PABPN1,DDX5,LSM8,CPSF1,NCBP1,RNPC3,CPSF2,SF3B4,TRMT61A,DBR1,CLASRP,CLP1,GEMIN6,RNF40,AAR2,SNRNP40,SNRPC,TRUB2,U2AF1,APEX1,SF1,PCID2,PELO,PABPC1,MRTO4,NCBP2,SF3A2,PRPF38A,TARDBP,SSU72,JMJD6,CWC22,SRSF1,LSM11,PPIH,LSM2,PDCD11,LSM7,PRPF38B,RBM22,HNRNPK,EXOSC10,UPF1,TXNL4B,DKC1,SNRNP25,FIP1L1,DDX47,EXOSC3,SNRPA1,CNOT3,RPRD1B,SRSF…
peptide metabolic process	GO:0006518	4.32767e-99	98.3637	799	2742	342	21272	EEFSEC,METTL14,MTG2,CARS2,MRPL15,MRPL52,SEPSECS,DPH5,MRPL36,TUFM,TYMS,EIF2S3X,MRPL17,EIF6,NARS2,SARS2,G6PDX,DARS,HARS,METTL17,EIF1AD,IARS,RPLP0,DPH6,MRPL55,PARS2,NSUN3,DPH2,NCBP1,LRPPRC,NARS,DHX33,MRPS16,YARS,MTG1,EIF3F,AARS2,DPH3,QRSL1,HSPA14,DDX3X,TARS,MRPL43,TSFM,MARS2,MRPL12,TRUB2,MRPL27,DHX29,LARS,GFM1,RSL24D1,MRPS21,EIF3K,FARS2,MRPL44,EIF3D,QARS,NCBP2,EIF2B1,TARDBP,EIF3A,RARS2,DHFR,MRPL39,E…
mRNA processing	GO:0006397	3.05641e-98	97.5148	471	2742	252	21272	PNPT1,PRPF19,METTL14,ZPR1,CPSF3,PRMT5,THOC3,CMTR1,SNRNP35,HNRNPU,PABPN1,DDX5,LSM8,CPSF1,NCBP1,RNPC3,CPSF2,SF3B4,DBR1,CLASRP,CLP1,GEMIN6,RNF40,AAR2,SNRNP40,SNRPC,TRUB2,U2AF1,SF1,PABPC1,NCBP2,SF3A2,PRPF38A,TARDBP,SSU72,JMJD6,CWC22,SRSF1,LSM11,PPIH,LSM2,PDCD11,LSM7,PRPF38B,RBM22,HNRNPK,TXNL4B,SNRNP25,FIP1L1,DDX47,SNRPA1,RPRD1B,SRSF3,CCDC94,PRPF6,PPIE,TUT1,SFSWAP,THOC6,ALYREF,TXNL4A,MAGOH,LSM10,HNRNP…
cellular component biogenesis	GO:0044085	1.96277e-95	94.7071	2888	2742	758	21272	HSD17B10,PNPT1,NDOR1,RABGGTA,PRPF19,NUBP2,PPP2R1A,NDUFAF7,NUBPL,PRMT5,FAM96B,TBCA,HSCB,CLTC,SCO2,NDUFA8,BCCIP,DR1,MRPL36,MCM4,TFB1M,NDUFA3,RIOK1,PAK1IP1,EIF2S3X,DDX49,ISCA2,SBDS,EIF6,RTEL1,RABGGTB,HNRNPU,XRCC3,ISCA1,DUT,MAK16,PRMT1,PET117,POU5F1,RBBP4,LETM1,GRWD1,MAX,HSPA4,RPLP0,TFRC,HAUS4,NSUN3,NCBP1,NUBP1,HDAC1,ATPAF2,RACGAP1,DHX33,CENPA,EIF3F,CLP1,GEMIN6,ISCU,GLRX3,NDUFA2,CTCF,DCAF13,GTF2B,DDX…
cellular protein-containing complex assembly	GO:0034622	2.62566e-90	89.5808	971	2742	371	21272	PRPF19,NDUFAF7,NUBPL,PRMT5,TBCA,CLTC,SCO2,NDUFA8,DR1,MCM4,NDUFA3,EIF2S3X,EIF6,PET117,RBBP4,GRWD1,HSPA4,RPLP0,NCBP1,ATPAF2,DHX33,CENPA,EIF3F,CLP1,GEMIN6,NDUFA2,GTF2B,DDX3X,RUVBL2,ACTR3,CENPN,AAR2,NDUFAF6,SNRPC,ARF1,MCM2,CCT2,DHX29,RAD51,RSL24D1,EIF3K,MCM7,EIF3D,NAPA,MRTO4,HIST2H3C1,ACTR2,SF3A2,HIST1H4H,TBCD,BOP1,ARPC4,EIF3A,HIST1H3F,PSMG3,ARPC2,SRSF1,TMEM126B,LSM2,DNAAF5,ACAD9,NDUFC1,TMEM70,NDUFB9…
rRNA metabolic process	GO:0016072	1.10333e-83	82.9573	210	2742	151	21272	TFB1M,RIOK1,DDX49,SBDS,EIF6,MAK16,NSUN3,DCAF13,ESF1,DIMT1,PELO,DDX10,MRTO4,BOP1,POP4,WDR12,PDCD11,NOL10,ERCC2,EXOSC10,UTP15,DDX54,PIH1D1,MDN1,EMG1,WDR18,DKC1,DIS3,DDX47,EXOSC3,TRMT112,DDX18,RPL5,RRS1,NOP14,WDR36,WDR3,RRP7A,WDR75,KRR1,RPL14,FTSJ3,EXOSC2,RPF2,RPS24,RPS16,RPS27,NAT10,MPHOSPH6,GTPBP4,RPP30,ABT1,IMP3,NOL6,IMP4,LSM6,DDX21,EXOSC5,RPL7A,RPL11,UTP18,NGDN,RPL7L1,WDR43,BMS1,PWP2,GEMIN4,EXOS…
rRNA processing	GO:0006364	2.46449e-82	81.6083	200	2742	146	21272	TFB1M,RIOK1,DDX49,SBDS,EIF6,MAK16,NSUN3,DCAF13,ESF1,DIMT1,DDX10,MRTO4,BOP1,POP4,WDR12,PDCD11,NOL10,ERCC2,EXOSC10,UTP15,DDX54,PIH1D1,MDN1,EMG1,WDR18,DKC1,DIS3,DDX47,EXOSC3,TRMT112,DDX18,RPL5,RRS1,NOP14,WDR36,WDR3,RRP7A,WDR75,KRR1,RPL14,FTSJ3,EXOSC2,RPF2,RPS24,RPS16,RPS27,NAT10,MPHOSPH6,GTPBP4,RPP30,ABT1,IMP3,NOL6,IMP4,LSM6,DDX21,EXOSC5,RPL7A,RPL11,UTP18,NGDN,RPL7L1,WDR43,BMS1,PWP2,GEMIN4,EXOSC8,SK…
RNA splicing	GO:0008380	3.66635e-81	80.4358	389	2742	209	21272	PRPF19,METTL14,ZPR1,PRMT5,THOC3,SNRNP35,HNRNPU,DDX5,RTCB,LSM8,NCBP1,RNPC3,SF3B4,DBR1,CLASRP,CLP1,GEMIN6,AAR2,SNRNP40,SNRPC,U2AF1,SF1,PABPC1,NCBP2,SF3A2,PRPF38A,TARDBP,JMJD6,CWC22,SRSF1,PPIH,LSM2,ZBTB8OS,LSM7,PRPF38B,RBM22,HNRNPK,TXNL4B,SNRNP25,DDX47,POLR2A,SNRPA1,SRSF3,CCDC94,PRPF6,PPIE,SFSWAP,THOC6,ALYREF,TXNL4A,MAGOH,LSM10,HNRNPF,SF3A3,DDX23,CD2BP2,THOC1,ZC3H10,SRSF5,SNRPE,SMN1,PHF5A,PPP1R8,SRS…
cellular component organization	GO:0016043	4.30813e-78	77.3657	5891	2742	1193	21272	HSD17B10,PNPT1,VRK1,HIST1H2AE,NDOR1,HIST1H2AN,RABGGTA,PRPF19,FDPS,NSF,NUBP2,PPP2R1A,ZPR1,NDUFAF7,MRPL15,WDR82,NUBPL,PRMT5,FAM96B,TBCA,HSCB,CLTC,FEN1,SCO2,VHL,NDUFA8,BCCIP,CHMP6,KAT8,DR1,WDR73,CLUH,MCM4,NDUFA3,L3MBTL2,EIF2S3X,DDX49,BANF1,ISCA2,SBDS,MRPL17,EIF6,RTEL1,RABGGTB,HNRNPU,TIMM17A,XRCC3,TMEM11,TIMM10,ISCA1,SMC6,TIMM50,DUT,SMC5,G6PDX,PRMT1,PET117,CDC37,POU5F1,RBBP4,LAMTOR4,STK11,TELO2,DNAJC…
protein-containing complex subunit organization	GO:0043933	1.96139e-77	76.7074	1618	2742	486	21272	HSD17B10,PNPT1,RABGGTA,PRPF19,NSF,PPP2R1A,NDUFAF7,NUBPL,PRMT5,TBCA,HSCB,CLTC,SCO2,NDUFA8,DR1,MCM4,NDUFA3,EIF2S3X,EIF6,RABGGTB,DUT,PRMT1,PET117,RBBP4,LETM1,GRWD1,MAX,HSPA4,RPLP0,TFRC,NCBP1,ATPAF2,DHX33,SMARCC1,SMARCE1,CENPA,EIF3F,CLP1,GEMIN6,NDUFA2,CTCF,GTF2B,DDX3X,VPS72,RUVBL2,ACTR3,CENPN,AAR2,NDUFAF6,ZW10,SNRPC,ARF1,OPA1,MCM2,CCT2,DHX29,MAT2A,RAD51,RSL24D1,EIF3K,MCM7,EIF3D,NAPA,MRTO4,HIST2H3C1,A…
cellular amide metabolic process	GO:0043603	4.96064e-74	73.3045	1036	2742	360	21272	EEFSEC,METTL14,MTG2,CARS2,MRPL15,MRPL52,SEPSECS,DPH5,MRPL36,TUFM,TYMS,EIF2S3X,MRPL17,EIF6,NARS2,SARS2,G6PDX,DARS,HARS,METTL17,EIF1AD,IARS,RPLP0,DPH6,MRPL55,PARS2,NSUN3,DPH2,NCBP1,LRPPRC,NARS,DHX33,MRPS16,YARS,MTG1,EIF3F,AARS2,DPH3,QRSL1,HSPA14,DDX3X,TARS,MRPL43,TSFM,MARS2,MRPL12,TRUB2,DLST,MRPL27,DHX29,LARS,GFM1,RSL24D1,MRPS21,EIF3K,FARS2,MRPL44,EIF3D,QARS,NCBP2,EIF2B1,TARDBP,EIF3A,RARS2,DHFR,MRP…
cell cycle	GO:0007049	3.58477e-73	72.4455	1723	2742	498	21272	OXSR1,PKMYT1,PNPT1,VRK1,PRPF19,RAD9A,PPP2R1A,ZPR1,PPP2CA,CLTC,FEN1,BCCIP,CHMP6,MCM4,SBDS,RTEL1,HNRNPU,XRCC3,SMC5,RBBP4,NUP43,STK11,SMC2,MRE11A,ERH,HAUS4,UXT,NUBP1,RACGAP1,FANCA,CENPA,DDX3X,ACTR3,ZW10,ARF1,MCM2,HDAC3,TUBB5,PPP6C,RAD51D,KDM8,ACTB,RAD51,APEX1,BIRC5,PCID2,SOX2,SDE2,RCC1,INTS3,MCM7,PELO,ACTR2,TBCD,ERCC4,BOP1,TARDBP,KIF2C,PCNA,CDK7,WDR12,TOP2A,ANAPC1,LSM11,DBF4,ANAPC11,SIN3A,ERCC2,ATR,…
protein-containing complex assembly	GO:0065003	6.64461e-72	71.1775	1444	2742	441	21272	HSD17B10,PNPT1,RABGGTA,PRPF19,PPP2R1A,NDUFAF7,NUBPL,PRMT5,TBCA,HSCB,CLTC,SCO2,NDUFA8,DR1,MCM4,NDUFA3,EIF2S3X,EIF6,RABGGTB,DUT,PRMT1,PET117,RBBP4,LETM1,GRWD1,MAX,HSPA4,RPLP0,TFRC,NCBP1,ATPAF2,DHX33,CENPA,EIF3F,CLP1,GEMIN6,NDUFA2,GTF2B,DDX3X,RUVBL2,ACTR3,CENPN,AAR2,NDUFAF6,ZW10,SNRPC,ARF1,OPA1,MCM2,CCT2,DHX29,MAT2A,RAD51,RSL24D1,EIF3K,MCM7,EIF3D,NAPA,MRTO4,HIST2H3C1,ACTR2,SF3A2,HIST1H4H,TBCD,BOP1,A…
DNA metabolic process	GO:0006259	4.06963e-71	70.3904	846	2742	313	21272	PRPF19,RAD9A,PRMT5,FEN1,BCCIP,MCM4,FANCL,BANF1,RTEL1,HNRNPU,XRCC3,SMC6,SMC5,TELO2,DNAJC2,SMC2,TEFM,TFRC,MRE11A,RAD50,PSMD14,FANCA,CCT7,RFC2,ORC5,ASCC3,REV1,CTCF,RUVBL2,GINS2,MMS22L,PPP4C,RBX1,MCM2,CCT2,POLD2,RAD51D,TCP1,RAD51,LIG3,APEX1,TEN1,INTS3,MCM7,ACTR2,ERCC4,POLA2,PCNA,CDK7,RFC5,TOP2A,RNASEH2A,MMS19,ERCC2,EXOSC10,PARP1,UBE2N,CHEK1,UPF1,XRCC6,RFWD3,WDR18,DKC1,SMC3,RIF1,EXOSC3,SMARCA4,LIG4,PO…
cellular protein metabolic process	GO:0044267	2.18673e-69	68.6602	4937	2742	1026	21272	HMBS,OXSR1,PKMYT1,VRK1,EEFSEC,RABGGTA,PRPF19,METTL14,CTU1,MTG2,PPP2R1A,GLRX5,CARS2,NDUFAF7,DOHH,MRPL15,MRPL52,UBA1,WDR82,PRMT5,SEPSECS,PPP2CA,VHL,DPH5,BCCIP,CHMP6,KAT8,DR1,PPIL2,NRBP1,TXN1,MRPL36,FANCL,IKBKAP,TUFM,L3MBTL2,RIOK1,ELP3,TYMS,EIF2S3X,MRPL17,EIF6,RABGGTB,TIMM17A,TIMM50,NARS2,SARS2,DPAGT1,BRAP,G6PDX,PRMT1,PABPN1,ALG13,CLPP,CDC37,PTP4A2,DARS,DCAF7,STK11,HARS,MOCS3,COPS3,TELO2,METTL17,SKP…
cellular process	GO:0009987	1.01031e-66	65.9955	17682	2742	2572	21272	HSD17B10,HMBS,OXSR1,PKMYT1,PNPT1,VRK1,EEFSEC,HIST1H2AE,NDOR1,HIST1H2AN,RABGGTA,PRPF19,FDPS,REXO2,NSF,RAD9A,ATP5A1,VPS29,METTL14,CTU1,MTG2,NUBP2,PPP2R1A,GLRX5,ZPR1,CPSF3,ELP5,CARS2,NDUFAF7,DOHH,SLC25A37,MRPL15,MRPL52,UBA1,WDR82,NUBPL,PRMT5,FAM96B,SEPSECS,TBCA,GOLT1B,HSCB,PPP2CA,CLTC,FEN1,SCO2,VHL,IPO13,GTF3C1,NDUFA8,DPH5,BCCIP,CHMP6,THOC3,KAT8,DR1,PPIL2,NRBP1,TXN1,WDR73,SKIV2L,MIOS,CMTR1,ATP6V1A,C…
organonitrogen compound biosynthetic process	GO:1901566	3.05577e-64	63.5149	1625	2742	461	21272	HMBS,EEFSEC,ATP5A1,METTL14,MTG2,CARS2,MRPL15,MRPL52,SEPSECS,CLTC,DPH5,MRPL36,TUFM,TYMS,EIF2S3X,MRPL17,EIF6,UROD,DUT,NARS2,PAICS,SARS2,DPAGT1,G6PDX,PRMT1,ALG13,DARS,HARS,MOCS3,METTL17,EIF1AD,IARS,RPLP0,DPH6,MRPL55,PARS2,PPOX,NSUN3,DPH2,NCBP1,LRPPRC,NARS,DHX33,MRPS16,YARS,MTG1,EIF3F,AARS2,DPH3,QRSL1,HSPA14,DDX3X,NFS1,TMEM258,ALG1,TARS,UMPS,MRPL43,TSFM,MARS2,MRPL12,TRUB2,MRPL27,DHX29,LARS,GFM1,AASDH…
mitotic cell cycle	GO:0000278	1.33847e-61	60.8734	852	2742	299	21272	OXSR1,PNPT1,RAD9A,PPP2R1A,ZPR1,CLTC,BCCIP,CHMP6,MCM4,SBDS,RTEL1,HNRNPU,XRCC3,SMC5,SMC2,MRE11A,RACGAP1,CENPA,DDX3X,ZW10,ARF1,MCM2,TUBB5,KDM8,RAD51,APEX1,BIRC5,PCID2,RCC1,INTS3,TBCD,KIF2C,PCNA,TOP2A,ANAPC1,LSM11,DBF4,ANAPC11,SIN3A,ERCC2,CHEK1,RAE1,BUB3,NLE1,NUP88,RFWD3,TUBG1,RAN,SMC3,RRM1,INCENP,RRS1,DDB1,RNASEH2B,LSM10,DNA2,CUL3,KNTC1,NANOG,CDC16,KIF18A,DCTN6,CDC73,TRIM71,MNAT1,KIF20B,SKA2,HINFP,P…
cell cycle process	GO:0022402	5.94164e-60	59.2261	1125	2742	354	21272	PNPT1,RAD9A,PPP2R1A,ZPR1,CLTC,FEN1,BCCIP,CHMP6,MCM4,SBDS,RTEL1,HNRNPU,XRCC3,SMC5,STK11,SMC2,MRE11A,HAUS4,UXT,NUBP1,RACGAP1,FANCA,CENPA,DDX3X,ACTR3,ZW10,ARF1,MCM2,HDAC3,TUBB5,RAD51D,KDM8,RAD51,APEX1,BIRC5,PCID2,SOX2,SDE2,RCC1,INTS3,MCM7,ACTR2,ERCC4,KIF2C,PCNA,TOP2A,ANAPC1,LSM11,DBF4,ANAPC11,SIN3A,ERCC2,CHEK1,RAE1,BUB3,MDM4,UPF1,RFWD3,TUBG1,RAN,SMC3,RPRD1B,INCENP,ORC3,RRS1,DDB1,RNASEH2B,LSM10,DNA2,…
mitotic cell cycle process	GO:1903047	6.52425e-60	59.1855	657	2742	252	21272	RAD9A,PPP2R1A,ZPR1,CLTC,BCCIP,CHMP6,MCM4,SBDS,RTEL1,HNRNPU,XRCC3,SMC5,SMC2,MRE11A,RACGAP1,CENPA,DDX3X,ZW10,ARF1,MCM2,KDM8,RAD51,APEX1,BIRC5,PCID2,RCC1,INTS3,KIF2C,PCNA,TOP2A,ANAPC1,LSM11,DBF4,ANAPC11,SIN3A,ERCC2,CHEK1,RAE1,BUB3,RFWD3,TUBG1,RAN,SMC3,INCENP,RRS1,DDB1,RNASEH2B,LSM10,DNA2,CUL3,KNTC1,CDC16,KIF18A,DCTN6,CDC73,TRIM71,MNAT1,KIF20B,HINFP,POLE,E2F4,ECT2,CTDP1,PHB2,MIS12,KIF11,ECD,BRD4,CUL4…
cellular response to DNA damage stimulus	GO:0006974	3.40032e-59	58.4685	762	2742	275	21272	PRPF19,RAD9A,UBA1,FEN1,BCCIP,MCM4,FANCL,RTEL1,XRCC3,SMC6,SMC5,DDX5,STK11,SMC2,MRE11A,RAD50,PSMD14,TRIAP1,FANCA,RFC2,ASCC3,REV1,RUVBL2,GINS2,MMS22L,PPP4C,RBX1,MCM2,POLD2,RAD51D,RAD51,LIG3,APEX1,INTS3,MCM7,ACTR2,ERCC4,TPT1,PCNA,CDK7,RFC5,TOP2A,RNASEH2A,MMS19,ERCC2,HNRNPK,PARP1,UBE2N,ATR,CHEK1,MDM4,UPF1,XRCC6,RFWD3,SMC3,RIF1,LIG4,TIPRL,CCDC94,POLR2I,DDB1,RNASEH2B,RFC4,DNA2,KAT5,SMARCAD1,HUWE1,SMG1,T…
mRNA splicing, via spliceosome	GO:0000398	4.32942e-58	57.3636	283	2742	152	21272	PRPF19,METTL14,PRMT5,SNRNP35,HNRNPU,DDX5,LSM8,NCBP1,RNPC3,SF3B4,DBR1,GEMIN6,AAR2,SNRPC,U2AF1,SF1,NCBP2,SF3A2,PRPF38A,JMJD6,CWC22,SRSF1,LSM2,LSM7,RBM22,HNRNPK,TXNL4B,SNRNP25,SNRPA1,SRSF3,PRPF6,PPIE,SFSWAP,TXNL4A,MAGOH,SF3A3,DDX23,ZC3H10,SRSF5,SNRPE,SMN1,PHF5A,SRSF7,SNRPD2,HNRNPL,CDC5L,PTBP1,SF3B3,GEMIN5,SNRPG,U2AF2,SMU1,TFIP11,CLNS1A,DDX41,LSM6,CRNKL1,PRPF8,TRA2B,PRPF40A,MFAP1B,CWF19L1,PRPF3,GEMIN…
RNA splicing, via transesterification reactions	GO:0000375	4.32942e-58	57.3636	283	2742	152	21272	PRPF19,METTL14,PRMT5,SNRNP35,HNRNPU,DDX5,LSM8,NCBP1,RNPC3,SF3B4,DBR1,GEMIN6,AAR2,SNRPC,U2AF1,SF1,NCBP2,SF3A2,PRPF38A,JMJD6,CWC22,SRSF1,LSM2,LSM7,RBM22,HNRNPK,TXNL4B,SNRNP25,SNRPA1,SRSF3,PRPF6,PPIE,SFSWAP,TXNL4A,MAGOH,SF3A3,DDX23,ZC3H10,SRSF5,SNRPE,SMN1,PHF5A,SRSF7,SNRPD2,HNRNPL,CDC5L,PTBP1,SF3B3,GEMIN5,SNRPG,U2AF2,SMU1,TFIP11,CLNS1A,DDX41,LSM6,CRNKL1,PRPF8,TRA2B,PRPF40A,MFAP1B,CWF19L1,PRPF3,GEMIN…
RNA splicing, via transesterification reactions with bulged adenosine as nucleophile	GO:0000377	4.32942e-58	57.3636	283	2742	152	21272	PRPF19,METTL14,PRMT5,SNRNP35,HNRNPU,DDX5,LSM8,NCBP1,RNPC3,SF3B4,DBR1,GEMIN6,AAR2,SNRPC,U2AF1,SF1,NCBP2,SF3A2,PRPF38A,JMJD6,CWC22,SRSF1,LSM2,LSM7,RBM22,HNRNPK,TXNL4B,SNRNP25,SNRPA1,SRSF3,PRPF6,PPIE,SFSWAP,TXNL4A,MAGOH,SF3A3,DDX23,ZC3H10,SRSF5,SNRPE,SMN1,PHF5A,SRSF7,SNRPD2,HNRNPL,CDC5L,PTBP1,SF3B3,GEMIN5,SNRPG,U2AF2,SMU1,TFIP11,CLNS1A,DDX41,LSM6,CRNKL1,PRPF8,TRA2B,PRPF40A,MFAP1B,CWF19L1,PRPF3,GEMIN…
DNA repair	GO:0006281	9.30324e-58	57.0314	485	2742	207	21272	PRPF19,RAD9A,FEN1,BCCIP,MCM4,FANCL,RTEL1,XRCC3,SMC6,SMC5,SMC2,MRE11A,RAD50,PSMD14,FANCA,RFC2,ASCC3,REV1,RUVBL2,GINS2,MMS22L,PPP4C,RBX1,MCM2,POLD2,RAD51D,RAD51,LIG3,APEX1,INTS3,MCM7,ACTR2,ERCC4,PCNA,CDK7,RFC5,RNASEH2A,MMS19,ERCC2,PARP1,UBE2N,CHEK1,UPF1,XRCC6,RFWD3,SMC3,RIF1,LIG4,POLR2I,DDB1,RFC4,DNA2,KAT5,SMARCAD1,HUWE1,SMG1,POLG,MNAT1,RNF8,LIG1,RAD1,HINFP,POLE,RFC3,TRIM28,CDC5L,GTF2H2,FIGNL1,GTF2…
ribonucleoprotein complex subunit organization	GO:0071826	3.08749e-57	56.5104	184	2742	119	21272	PRPF19,PRMT5,EIF2S3X,EIF6,RPLP0,NCBP1,EIF3F,CLP1,GEMIN6,RUVBL2,AAR2,SNRPC,DHX29,RSL24D1,EIF3K,EIF3D,MRTO4,SF3A2,BOP1,EIF3A,SRSF1,LSM2,ATR,PIH1D1,NLE1,MDN1,RPL10,RPL12,DDX28,ERAL1,EIF5,EIF3C,PRPF6,RPL5,SFSWAP,RRS1,EIF3I,RRP7A,SF3A3,PPAN,MRPL11,RPS2,CDC73,NUDT21,SNRPE,SMN1,RPF2,EIF3H,RPS27,SNRPD2,EIF3L,GEMIN5,ABT1,SNRPG,TFIP11,CLNS1A,CRNKL1,PRPF8,RPL6,RPS10,RPL11,PRPF3,VCP,PWP2,RPL24,GEMIN4,NUFIP1,…
ribonucleoprotein complex assembly	GO:0022618	2.86964e-56	55.5422	178	2742	116	21272	PRPF19,PRMT5,EIF2S3X,EIF6,RPLP0,NCBP1,EIF3F,CLP1,GEMIN6,RUVBL2,AAR2,SNRPC,DHX29,RSL24D1,EIF3K,EIF3D,MRTO4,SF3A2,BOP1,EIF3A,SRSF1,LSM2,ATR,PIH1D1,NLE1,MDN1,RPL10,RPL12,DDX28,ERAL1,EIF5,EIF3C,PRPF6,RPL5,SFSWAP,RRS1,EIF3I,RRP7A,SF3A3,PPAN,MRPL11,RPS2,CDC73,NUDT21,SNRPE,SMN1,RPF2,EIF3H,RPS27,SNRPD2,EIF3L,GEMIN5,ABT1,SNRPG,CLNS1A,CRNKL1,PRPF8,RPL6,RPS10,RPL11,PRPF3,PWP2,RPL24,GEMIN4,NUFIP1,RPSA,SNRPD1…
chromosome segregation	GO:0007059	1.60223e-53	52.7953	325	2742	159	21272	PPP2R1A,FAM96B,FEN1,CHMP6,BANF1,HNRNPU,XRCC3,SMC6,SMC5,NUP43,SMC2,MRE11A,RACGAP1,CTCF,DDX3X,ACTR3,CENPN,ZW10,CIAO1,BIRC5,PCID2,RCC1,ACTR2,ERCC4,KIF2C,TOP2A,ANAPC1,ANAPC11,MMS19,ERCC2,BUB3,TUBG1,RAN,SMC3,INCENP,RRS1,CUL3,SMARCAD1,CDC16,KIF18A,SKA2,ECT2,PHB2,MIS12,DDX11,BRD4,KIF23,CDC23,CENPW,NCAPH2,CDT1,SMC4,NUMA1,RPS3,KPNB1,PLK1,CHTF8,PDS5B,UBE2C,ARL8B,KIF18B,CHAMP1,DSCC1,DCTN2,RAD51C,ATM,POGZ,NS…
DNA replication	GO:0006260	1.68404e-50	49.7736	241	2742	131	21272	ZPR1,FEN1,MCM4,RTEL1,RBBP4,DNAJC2,GRWD1,MRE11A,RFC2,ORC5,GINS2,MMS22L,ORC6,MCM2,POLD2,SSBP1,RAD51,LIG3,SDE2,MCM7,POLA2,PCNA,RFC5,DBF4,SIN3A,ATR,UPF1,RFWD3,WDR18,DNAJA3,SMC3,LIG4,RRM1,ORC3,STOML2,RFC4,DNA2,DDX23,THOC1,POLG,PRIM1,LIG1,POLE,RFC3,DDX11,GTPBP4,TIMELESS,RPA1,USP37,RBBP6,CHAF1B,CHTF18,MCM9,HUS1,POLD1,E4F1,DDX21,CDT1,CDK1,RRM2,TIPIN,TOPBP1,CHTF8,TONSL,CDK9,DSCC1,POLG2,TTF1,CCNA2,RECQL4,D…
protein metabolic process	GO:0019538	4.04127e-49	48.3935	5601	2742	1061	21272	HMBS,OXSR1,PKMYT1,VRK1,EEFSEC,RABGGTA,PRPF19,NSF,METTL14,CTU1,MTG2,PPP2R1A,GLRX5,CARS2,NDUFAF7,DOHH,MRPL15,MRPL52,UBA1,WDR82,PRMT5,FAM96B,SEPSECS,HSCB,PPP2CA,VHL,DPH5,BCCIP,CHMP6,KAT8,DR1,PPIL2,NRBP1,TXN1,MRPL36,FANCL,IKBKAP,TUFM,L3MBTL2,RIOK1,ELP3,TYMS,EIF2S3X,ISCA2,MRPL17,EIF6,RABGGTB,TIMM17A,ISCA1,TIMM50,NARS2,SARS2,DPAGT1,BRAP,G6PDX,PRMT1,PABPN1,ALG13,CLPP,CDC37,PTP4A2,DARS,DCAF7,STK11,HARS,M…
chromatin organization	GO:0006325	1.11711e-48	47.9519	770	2742	259	21272	VRK1,HIST1H2AE,HIST1H2AN,WDR82,PRMT5,KAT8,DR1,L3MBTL2,HNRNPU,PRMT1,POU5F1,RBBP4,DNAJC2,SKP1A,GRWD1,HDAC1,SMARCC1,SMARCE1,RNF40,CTCF,GTF2B,VPS72,RUVBL2,MCM2,HDAC3,KDM8,SETD5,HIST2H3C1,HIST1H4H,HIST1H3F,NCOA3,JMJD6,SIN3A,TADA1,UBE2N,PIH1D1,CHEK1,POLE3,PWP1,RIF1,SETDB1,YEATS4,SMARCA4,BAP1,CXXC1,INCENP,DDB1,KAT5,FAM208A,SMARCAD1,HUWE1,FAM50A,SRCAP,GTF3C4,CDC73,RNF8,PHB,DNMT1,TRIM28,HIST1H2BN,HIST1H4N…
cellular component assembly	GO:0022607	2.14792e-48	47.668	2657	2742	605	21272	HSD17B10,PNPT1,NDOR1,RABGGTA,PRPF19,NUBP2,PPP2R1A,NDUFAF7,NUBPL,PRMT5,FAM96B,TBCA,HSCB,CLTC,SCO2,NDUFA8,BCCIP,DR1,MCM4,NDUFA3,EIF2S3X,ISCA2,SBDS,EIF6,RTEL1,RABGGTB,HNRNPU,XRCC3,ISCA1,DUT,PRMT1,PET117,POU5F1,RBBP4,LETM1,GRWD1,MAX,HSPA4,RPLP0,TFRC,HAUS4,NCBP1,NUBP1,HDAC1,ATPAF2,RACGAP1,DHX33,CENPA,EIF3F,CLP1,GEMIN6,ISCU,GLRX3,NDUFA2,CTCF,GTF2B,DDX3X,NFS1,RUVBL2,ACTR3,CENPN,AAR2,HSPA9,NDUFAF6,ZW10,S…
regulation of chromosome organization	GO:0033044	6.12097e-47	46.2132	363	2742	161	21272	FEN1,L3MBTL2,RTEL1,HNRNPU,XRCC3,SMC5,POU5F1,MRE11A,CCT7,RNF40,CTCF,RUVBL2,ZW10,MCM2,CCT2,SSBP1,TCP1,BIRC5,TEN1,SETD5,PCID2,ERCC4,TOP2A,ANAPC1,ANAPC11,SIN3A,EXOSC10,UBE2N,PIH1D1,CHEK1,BUB3,UPF1,DKC1,RIF1,SETDB1,LIG4,CCT3,CUL3,FAM208A,SENP6,CCT4,CDC16,SMG1,MNAT1,DNMT1,TRIM28,NAT10,GTF2H2,CTR9,TINF2,DDX11,PAF1,CCT5,BRD4,KMT2B,MYC,FH1,DHX36,CDC23,ZFP335,CDT1,WDR5,RTF1,NUMA1,GNL3L,EP300,PLK1,NELFA,CDK…
sister chromatid segregation	GO:0000819	2.62671e-46	45.5806	182	2742	108	21272	PPP2R1A,FEN1,CHMP6,HNRNPU,XRCC3,SMC5,SMC2,MRE11A,RACGAP1,ZW10,BIRC5,PCID2,KIF2C,TOP2A,ANAPC1,ANAPC11,BUB3,TUBG1,RAN,SMC3,INCENP,RRS1,CUL3,CDC16,KIF18A,PHB2,MIS12,DDX11,KIF23,CDC23,NCAPH2,CDT1,SMC4,NUMA1,KPNB1,PLK1,CHTF8,PDS5B,UBE2C,KIF18B,CHAMP1,DSCC1,DCTN2,RAD51C,ATM,POGZ,NSL1,ESCO2,PSMG2,SPDL1,CDC27,AURKB,NSMCE2,NAA50,NCAPD2,PHF23,CENPK,BECN1,INO80,NAA10,SMC1A,CDC20,ANAPC4,TPR,SPAG5,RMI2,MAD2L1…
protein-DNA complex subunit organization	GO:0071824	8.78379e-46	45.0563	225	2742	121	21272	DR1,MCM4,RBBP4,GRWD1,SMARCC1,SMARCE1,CENPA,CTCF,GTF2B,VPS72,CENPN,MCM2,RAD51,MCM7,HIST2H3C1,HIST1H4H,HIST1H3F,PIH1D1,SMARCA4,UBTF,BRF2,ORC3,SENP6,PSMC5,GTF2E1,SRCAP,RNF8,TBP,HIST1H2BN,PSMC6,HIST1H4N,TAF1C,MIS12,PAF1,PSMC4,MYC,CHAF1B,HIST1H2BP,CENPO,HIST1H3G,CENPW,CDT1,IPO4,HIST1H4M,EP300,HIST1H3D,HIST2H2AA2,DAXX,HIST2H3B,HIST1H4B,HIST1H3H,SETD2,DMAP1,GTF2A2,BPTF,CAND1,PBRM1,HIST1H4A,POGZ,BRF1,ANP…
mitotic sister chromatid segregation	GO:0000070	2.14472e-44	43.6686	149	2742	95	21272	PPP2R1A,CHMP6,HNRNPU,XRCC3,SMC5,SMC2,RACGAP1,ZW10,BIRC5,PCID2,KIF2C,ANAPC1,ANAPC11,BUB3,TUBG1,RAN,INCENP,RRS1,CUL3,CDC16,KIF18A,MIS12,KIF23,CDC23,NCAPH2,CDT1,SMC4,NUMA1,KPNB1,PLK1,CHTF8,PDS5B,UBE2C,KIF18B,CHAMP1,DSCC1,DCTN2,ATM,POGZ,NSL1,PSMG2,SPDL1,CDC27,AURKB,NSMCE2,NAA50,NCAPD2,PHF23,CENPK,BECN1,INO80,NAA10,SMC1A,CDC20,ANAPC4,TPR,SPAG5,MAD2L1,KATNB1,MAD1L1,ZWINT,NIPBL,ESPL1,TRIP13,ZFP207,CENPC…
DNA conformation change	GO:0071103	1.08637e-43	42.964	300	2742	140	21272	MCM4,BANF1,RTEL1,POU5F1,RBBP4,SMC2,GRWD1,MRE11A,HDAC1,SMARCC1,RFC2,ASCC3,CTCF,DDX3X,RUVBL2,GINS2,MCM2,SSBP1,RAD51,MCM7,HIST2H3C1,HIST1H4H,HIST1H3F,RFC5,TOP2A,ERCC2,XRCC6,SETDB1,SMARCA4,INCENP,RFC4,DNA2,FAM208A,SMARCAD1,MNAT1,RNF8,DNMT1,NCAPG2,RFC3,TRIM28,HIST1H2BN,HIST1H4N,GTF2H2,DDX11,PAF1,SUPV3L1,RPA1,CHAF1B,DHX36,CHTF18,CHD8,MCM9,HIST1H2BP,HIST1H3G,NCAPH2,IPO4,SMC4,ERCC3,HIST1H4M,CDK1,HIST1H3D…
mitochondrial gene expression	GO:0140053	1.63017e-43	42.7878	108	2742	79	21272	HSD17B10,PNPT1,MTG2,MRPL52,TUFM,SARS2,HARS,POLRMT,TEFM,NSUN3,LRPPRC,MRPS16,MTG1,AARS2,QRSL1,MRPL43,TSFM,MRPL12,TRUB2,GFM1,MRPS21,MRPL44,RARS2,GATB,GFM2,MRPS2,MRPS27,MRPS18B,MRPL2,MRPL57,RPUSD4,MRPS25,AARS,TRMT5,UQCC2,SUPV3L1,MRPS34,MALSU1,PTCD1,MTIF2,GARS,IARS2,DARS2,MRPL16,TFB2M,NSUN4,MRPS15,LARS2,MRPS6,UQCC1,MTERF3,ELAC2,MRPL51,WARS2,MTIF3,MRPS7,MRPS12,TRMT10C,CHCHD1,PTCD3,ALKBH1,FASTKD3,MRPL47…
tRNA metabolic process	GO:0006399	6.83111e-43	42.1655	171	2742	101	21272	HSD17B10,CTU1,ELP5,CARS2,SEPSECS,IKBKAP,ELP3,NARS2,ELP6,SARS2,RTCB,DARS,HARS,MOCS3,IARS,PARS2,NSUN3,NARS,TRMT61A,YARS,AARS2,CLP1,DPH3,QRSL1,TRMU,TARS,GTPBP3,MARS2,TRUB2,ADAT3,LARS,FARS2,QARS,RARS2,POP4,ZBTB8OS,MTO1,GATB,EXOSC10,VARS2,EXOSC3,TRMT112,ELP2,RPUSD4,AARS,POLR3K,TRIT1,URM1,TRMT5,KARS,MTFMT,SSB,VARS,EXOSC2,PUS7,RPP38,NAT10,RPP30,PTCD1,RPP21,GARS,LSM6,FARSA,IARS2,DARS2,EXOSC8,EXOSC7,RPP14…
RNA localization	GO:0006403	1.69298e-42	41.7713	191	2742	107	21272	PNPT1,THOC3,EIF6,HNRNPU,PABPN1,NUP43,NCBP1,LRPPRC,CCT2,TCP1,PCID2,NUP85,NCBP2,SRSF1,ABCE1,NXT1,EXOSC10,ATR,PIH1D1,RAE1,NUP88,DKC1,RAN,EXOSC3,PHAX,SRSF3,PRPF6,THOC6,RRS1,ALYREF,MAGOH,SNUPN,CCT4,SDAD1,THOC1,SSB,EXOSC2,SRSF7,NOP58,AHCTF1,LSG1,ENY2,NUTF2,DHX36,NOL6,SARNP,NMD3,NUP50,MRPL18,NUP93,NUP107,XPO1,SETD2,SEC13,NUP214,PRPF18,ATM,NUP160,PARN,POLR2D,ZC3H3,YBX1,ZNHIT6,THOC5,NUPL1,HNRNPA1,GLE1,RPS…
cell division	GO:0051301	5.14058e-41	40.289	566	2742	201	21272	VRK1,CLTC,CHMP6,HNRNPU,SMC5,POU5F1,NUP43,SMC2,HAUS4,RACGAP1,CENPA,ACTR3,ZW10,ARF1,ORC6,BIRC5,SDE2,RCC1,PELO,ACTR2,KIF2C,CDK7,TOP2A,ANAPC1,ANAPC11,ERCC2,RAE1,BUB3,RAN,SMC3,LIG4,INCENP,TXNL4A,CUL3,KNTC1,NANOG,CDC16,ANAPC2,RNF8,KIF20B,SKA2,SPC24,NCAPG2,HAUS7,ECT2,AHCTF1,CTDP1,CSNK1A1,MIS12,MAPRE1,KIF11,BIRC6,KIF23,MASTL,ANKLE2,MYC,TIMELESS,USP37,CENPW,E4F1,PRPF40A,CDT1,HAUS3,PIK3C3,SMC4,CDK1,NUMA1,U…
organonitrogen compound metabolic process	GO:1901564	4.3875e-40	39.3578	6429	2742	1146	21272	HMBS,OXSR1,PKMYT1,VRK1,EEFSEC,RABGGTA,PRPF19,NSF,ATP5A1,METTL14,CTU1,MTG2,PPP2R1A,GLRX5,CARS2,NDUFAF7,DOHH,MRPL15,MRPL52,UBA1,WDR82,PRMT5,FAM96B,SEPSECS,HSCB,PPP2CA,CLTC,VHL,DPH5,BCCIP,CHMP6,KAT8,DR1,PPIL2,NRBP1,TXN1,MRPL36,FANCL,IKBKAP,TUFM,L3MBTL2,RIOK1,ELP3,TYMS,EIF2S3X,ISCA2,MRPL17,EIF6,RABGGTB,TIMM17A,ISCA1,UROD,TIMM50,DUT,NARS2,PAICS,SARS2,DPAGT1,BRAP,G6PDX,PRMT1,PABPN1,ALG13,CLPP,CDC37,PTP…
protein localization to organelle	GO:0033365	7.03037e-40	39.153	834	2742	256	21272	ZPR1,PPP2CA,IPO13,TXN1,HNRNPU,TIMM17A,TIMM10,TIMM50,LAMTOR4,STK11,SKP1A,IPO7,HSPA4,TFRC,SRP72,CENPA,CCT7,CTCF,TOMM22,VPS25,DDX3X,RUVBL2,ZW10,HDAC3,CCT2,MFN2,TCP1,MBTPS1,TNPO3,NUP85,SNF8,TARDBP,POLA2,GOSR2,NXT1,SIN3A,RBM22,PARP1,ATR,DNAJC15,PIH1D1,BUB3,NUP88,DKC1,RAN,SEC61A1,DNM1L,ARFRP1,SRP19,PMPCB,TIMM44,RRS1,PAM16,CCT3,FAM208A,SNUPN,CCT4,COX18,STAT3,HEATR3,SSB,RPF2,KIF20B,NUDCD3,TRIM28,TAF8,ECT…
mitochondrial translation	GO:0032543	1.04588e-39	38.9805	79	2742	64	21272	MTG2,MRPL52,TUFM,SARS2,HARS,NSUN3,LRPPRC,MRPS16,MTG1,AARS2,QRSL1,MRPL43,TSFM,TRUB2,GFM1,MRPS21,MRPL44,RARS2,GATB,GFM2,MRPS2,MRPS27,MRPS18B,MRPL2,MRPL57,RPUSD4,MRPS25,AARS,UQCC2,MRPS34,MALSU1,PTCD1,MTIF2,GARS,IARS2,DARS2,MRPL16,NSUN4,MRPS15,LARS2,MRPS6,UQCC1,MRPL51,WARS2,MTIF3,MRPS7,MRPS12,TRMT10C,CHCHD1,PTCD3,ALKBH1,FASTKD3,MRPL47,MRPS24,MPV17L2,MTRF1L,MRPL23,NOA1,YARS2,MRPS35,MRPS17,MRPS14,NGRN,…
nuclear chromosome segregation	GO:0098813	2.31283e-39	38.6359	265	2742	125	21272	PPP2R1A,FEN1,CHMP6,HNRNPU,XRCC3,SMC5,SMC2,MRE11A,RACGAP1,ACTR3,ZW10,BIRC5,PCID2,ACTR2,ERCC4,KIF2C,TOP2A,ANAPC1,ANAPC11,BUB3,TUBG1,RAN,SMC3,INCENP,RRS1,CUL3,CDC16,KIF18A,ECT2,PHB2,MIS12,DDX11,KIF23,CDC23,NCAPH2,CDT1,SMC4,NUMA1,KPNB1,PLK1,CHTF8,PDS5B,UBE2C,KIF18B,CHAMP1,DSCC1,DCTN2,RAD51C,ATM,POGZ,NSL1,ESCO2,FANCM,PSMG2,SPDL1,CDC27,AURKB,DYNC1H1,NSMCE2,NAA50,NCAPD2,FANCD2,PHF23,CENPK,BECN1,INO80,NA…
protein-DNA complex assembly	GO:0065004	2.47094e-38	37.6071	186	2742	101	21272	DR1,MCM4,RBBP4,GRWD1,CENPA,GTF2B,CENPN,MCM2,RAD51,MCM7,HIST2H3C1,HIST1H4H,HIST1H3F,PIH1D1,SMARCA4,UBTF,BRF2,ORC3,SENP6,PSMC5,TBP,HIST1H2BN,PSMC6,HIST1H4N,TAF1C,MIS12,PSMC4,CHAF1B,HIST1H2BP,CENPO,HIST1H3G,CENPW,CDT1,IPO4,HIST1H4M,EP300,HIST1H3D,HIST2H2AA2,DAXX,HIST2H3B,HIST1H4B,HIST1H3H,GTF2A2,CAND1,HIST1H4A,POGZ,BRF1,ANP32B,SMARCB1,HIST1H4F,PSMC2,TAF6,SMARCA5,CHAF1A,HIST1H2BK,BRD2,HIST1H2BF,HIST1…
mitotic nuclear division	GO:0140014	3.97055e-37	36.4011	257	2742	120	21272	PPP2R1A,CLTC,BCCIP,CHMP6,HNRNPU,XRCC3,SMC5,SMC2,RACGAP1,ZW10,BIRC5,PCID2,RCC1,KIF2C,ANAPC1,ANAPC11,CHEK1,BUB3,TUBG1,RAN,SMC3,INCENP,RRS1,CUL3,CDC16,KIF18A,KIF20B,CTDP1,PHB2,MIS12,KIF11,KIF23,MYBL2,CDC23,NCAPH2,CDT1,SMC4,NUMA1,USP16,RPL24,RANBP1,BORA,TPX2,KPNB1,PLK1,CHTF8,PDS5B,UBE2C,KIF18B,CHAMP1,DSCC1,DCTN2,ATM,POGZ,AURKA,NSL1,PSMG2,SPDL1,CDC27,AURKB,NSMCE2,CEP85,DRG1,NAA50,NCAPD2,PHF23,CENPK,BE…
heterocycle biosynthetic process	GO:0018130	6.31114e-37	36.1999	3969	2742	776	21272	HMBS,HIST1H2AE,HIST1H2AN,ATP5A1,ZPR1,PRMT5,SEPSECS,PPP2CA,VHL,GTF3C1,KAT8,DR1,TXN1,L3MBTL2,ELP3,TYMS,HNRNPU,UROD,DUT,PAICS,SARS2,SCAP,G6PDX,DDX5,POU5F1,NR0B1,MOCS3,TELO2,POLRMT,DNAJC2,MAX,NELFB,TEFM,CRCP,MED26,TFRC,MED20,PPOX,UXT,HDAC1,ITPA,DHX33,NEDD8,MED12,SMARCC1,TRIAP1,FANCA,SMARCE1,CCT7,RFC2,POLR3B,REV1,CTCF,GTF2B,DDX3X,NFS1,VPS72,ZFP281,RUVBL2,ACTR3,IGBP1,UMPS,CIAO1,MRPL12,PFDN5,NAA15,HDAC3…
aromatic compound biosynthetic process	GO:0019438	1.35532e-35	34.868	3981	2742	773	21272	HMBS,HIST1H2AE,HIST1H2AN,ATP5A1,ZPR1,PRMT5,SEPSECS,PPP2CA,VHL,GTF3C1,KAT8,DR1,TXN1,L3MBTL2,ELP3,TYMS,HNRNPU,UROD,DUT,PAICS,SARS2,SCAP,G6PDX,DDX5,POU5F1,NR0B1,TELO2,POLRMT,DNAJC2,MAX,NELFB,TEFM,CRCP,MED26,TFRC,MED20,PPOX,UXT,HDAC1,ITPA,DHX33,NEDD8,MED12,SMARCC1,TRIAP1,FANCA,SMARCE1,CCT7,RFC2,POLR3B,REV1,CTCF,GTF2B,DDX3X,VPS72,ZFP281,RUVBL2,ACTR3,IGBP1,UMPS,CIAO1,MRPL12,PFDN5,NAA15,HDAC3,CCT2,TRAIP…
ribosomal large subunit biogenesis	GO:0042273	1.62082e-35	34.7903	72	2742	58	21272	PAK1IP1,EIF6,MAK16,RPLP0,RSL24D1,MRTO4,BOP1,WDR12,NLE1,MDN1,RPL10,RPL12,DDX28,DDX18,RPL5,RRS1,PPAN,RPL14,FTSJ3,MRPL11,SDAD1,HEATR3,RPF2,GTPBP4,MALSU1,RPL6,RPL7A,RPL11,RPL7L1,RPL24,NHP2,NOP16,ORAOV1,DHX30,RPL38,NSA2,SURF6,RPL7,ZNHIT6,RPL35,RPL26,RPL23A,RSL1D1,EBNA1BP2,RPL35A,WDR74,MRPL20,NIP7,NPM1,RPL3,RRP15,NVL,BRIX1,MRPL1,ZNHIT3,RPF1,LAS1L,PES1
nucleobase-containing compound biosynthetic process	GO:0034654	4.24438e-35	34.3722	3907	2742	760	21272	HIST1H2AE,HIST1H2AN,ATP5A1,ZPR1,PRMT5,SEPSECS,PPP2CA,VHL,GTF3C1,KAT8,DR1,TXN1,L3MBTL2,ELP3,TYMS,HNRNPU,DUT,PAICS,SARS2,SCAP,G6PDX,DDX5,POU5F1,NR0B1,TELO2,POLRMT,DNAJC2,MAX,NELFB,TEFM,CRCP,MED26,TFRC,MED20,UXT,HDAC1,ITPA,DHX33,NEDD8,MED12,SMARCC1,TRIAP1,FANCA,SMARCE1,CCT7,RFC2,POLR3B,REV1,CTCF,GTF2B,DDX3X,VPS72,ZFP281,RUVBL2,ACTR3,IGBP1,UMPS,CIAO1,MRPL12,PFDN5,NAA15,HDAC3,CCT2,TRAIP,EAF1,POLD2,KDM…
ribosomal small subunit biogenesis	GO:0042274	5.43668e-35	34.2647	64	2742	54	21272	RIOK1,DCAF13,NOL10,ERCC2,ERAL1,RRS1,NOP14,WDR3,RRP7A,RPS2,RPS24,RPS16,RPS27,NAT10,NOM1,ABT1,LSM6,RPS10,NGDN,BMS1,PWP2,DHX37,RPSA,RPS8,UTP23,RPS6,RRP36,RPS21,RPS25,RPS17,RPL38,SURF6,SRFBP1,HEATR1,MRPS7,RPS15,RPS19,RPS14,FCF1,RPS28,NPM1,RCL1,RPS7,BYSL,WDR46,DDX52,UTP6,GTF2H5,TBL3,TSR1,NOB1,HELQ,LTV1,FAM207A
DNA-dependent DNA replication	GO:0006261	1.09878e-34	33.9591	129	2742	79	21272	ZPR1,MCM4,RTEL1,MRE11A,RFC2,ORC5,MMS22L,MCM2,POLD2,SSBP1,RAD51,LIG3,MCM7,POLA2,PCNA,RFC5,DBF4,UPF1,RFWD3,WDR18,DNAJA3,ORC3,STOML2,RFC4,DNA2,DDX23,THOC1,POLG,PRIM1,POLE,RFC3,DDX11,TIMELESS,RPA1,CHTF18,MCM9,POLD1,DDX21,CDT1,TIPIN,TOPBP1,CHTF8,TONSL,CDK9,DSCC1,POLG2,RECQL4,DONSON,FANCM,PRIM2,ORC4,MCM6,KAT7,POLE2,BLM,POLQ,INO80,CDC7,ORC1,MCM5,NPM1,CDK2,GINS1,CDC45,MCM10,CCNE1,SENP2,BRCA2,GMNN,MCMBP,A…
organic cyclic compound biosynthetic process	GO:1901362	6.24192e-34	33.2047	4115	2742	787	21272	HMBS,HIST1H2AE,HIST1H2AN,FDPS,ATP5A1,ZPR1,PRMT5,SEPSECS,PPP2CA,VHL,GTF3C1,KAT8,DR1,TXN1,L3MBTL2,ELP3,TYMS,HNRNPU,UROD,ATP1A1,DUT,PAICS,SARS2,SCAP,G6PDX,DDX5,POU5F1,NR0B1,MOCS3,TELO2,POLRMT,DNAJC2,MAX,NELFB,TEFM,CRCP,MED26,TFRC,MED20,PPOX,UXT,HDAC1,ITPA,DHX33,NEDD8,MED12,SMARCC1,TRIAP1,FANCA,SMARCE1,CCT7,RFC2,POLR3B,REV1,CTCF,GTF2B,DDX3X,NFS1,VPS72,ZFP281,RUVBL2,ACTR3,IGBP1,UMPS,CIAO1,MRPL12,PFDN5…
regulation of cellular macromolecule biosynthetic process	GO:2000112	1.45491e-33	32.8372	3766	2742	733	21272	EEFSEC,HIST1H2AE,HIST1H2AN,METTL14,MTG2,ZPR1,SEPSECS,PPP2CA,VHL,DPH5,KAT8,DR1,TXN1,L3MBTL2,ELP3,TYMS,EIF2S3X,EIF6,HNRNPU,SCAP,PRMT1,DDX5,POU5F1,NR0B1,DNAJC2,MAX,NELFB,MED26,TFRC,DPH6,MED20,UXT,NSUN3,DPH2,NCBP1,HDAC1,LRPPRC,DHX33,NEDD8,MED12,SMARCC1,TRIAP1,FANCA,SMARCE1,MTG1,CCT7,RFC2,ORC5,DPH3,CTCF,GTF2B,DDX3X,VPS72,ZFP281,RUVBL2,ACTR3,IGBP1,CIAO1,TSFM,MRPL12,TRUB2,PFDN5,NAA15,HDAC3,CCT2,TRAIP,DH…
organelle fission	GO:0048285	2.5933e-33	32.5861	459	2742	164	21272	PPP2R1A,CLTC,BCCIP,CHMP6,HNRNPU,XRCC3,SMC5,SMC2,MRE11A,RACGAP1,FANCA,ACTR3,ZW10,OPA1,RAD51D,RAD51,BIRC5,PCID2,RCC1,ACTR2,MFN1,ERCC4,KIF2C,TOP2A,ANAPC1,ANAPC11,CHEK1,BUB3,TUBG1,RAN,SMC3,COX10,DNM1L,INCENP,RRS1,CUL3,CDC16,KIF18A,KIF20B,RAD1,FIGNL1,CTDP1,PHB2,MIS12,KIF11,KIF23,MASTL,MYBL2,DHODH,CDC23,MTCH2,NCAPH2,CDT1,SMC4,NUMA1,USP16,RPL24,RANBP1,BORA,TPX2,TOPBP1,KPNB1,PRKAR1A,PLK1,CHTF8,PDS5B,UBE2…
regulation of macromolecule biosynthetic process	GO:0010556	4.66808e-33	32.3309	3904	2742	752	21272	EEFSEC,HIST1H2AE,HIST1H2AN,METTL14,MTG2,ZPR1,SEPSECS,PPP2CA,CLTC,VHL,DPH5,KAT8,DR1,TXN1,L3MBTL2,ELP3,TYMS,EIF2S3X,EIF6,HNRNPU,SCAP,PRMT1,DDX5,POU5F1,NR0B1,DNAJC2,MAX,NELFB,MED26,TFRC,DPH6,MED20,UXT,NSUN3,DPH2,NCBP1,HDAC1,LRPPRC,DHX33,NEDD8,MED12,SMARCC1,TRIAP1,FANCA,SMARCE1,MTG1,CCT7,RFC2,ORC5,DPH3,CTCF,GTF2B,DDX3X,VPS72,ZFP281,RUVBL2,ACTR3,IGBP1,CIAO1,TSFM,MRPL12,TRUB2,PFDN5,NAA15,HDAC3,CCT2,TRA…
nuclear division	GO:0000280	2.61477e-32	31.5826	405	2742	150	21272	PPP2R1A,CLTC,BCCIP,CHMP6,HNRNPU,XRCC3,SMC5,SMC2,MRE11A,RACGAP1,FANCA,ACTR3,ZW10,RAD51D,RAD51,BIRC5,PCID2,RCC1,ACTR2,ERCC4,KIF2C,TOP2A,ANAPC1,ANAPC11,CHEK1,BUB3,TUBG1,RAN,SMC3,INCENP,RRS1,CUL3,CDC16,KIF18A,KIF20B,RAD1,FIGNL1,CTDP1,PHB2,MIS12,KIF11,KIF23,MASTL,MYBL2,CDC23,NCAPH2,CDT1,SMC4,NUMA1,USP16,RPL24,RANBP1,BORA,TPX2,TOPBP1,KPNB1,PRKAR1A,PLK1,CHTF8,PDS5B,UBE2C,KIF18B,CHAMP1,DSCC1,DCTN2,RAD51C…
telomere maintenance	GO:0000723	2.71875e-32	31.5656	127	2742	76	21272	RTEL1,HNRNPU,XRCC3,SMC6,SMC5,TELO2,MRE11A,RAD50,CCT7,CCT2,RAD51D,TCP1,RAD51,APEX1,TEN1,ERCC4,PCNA,EXOSC10,UPF1,XRCC6,DKC1,RIF1,DNA2,CCT3,CCT4,SMG1,NAT10,TINF2,CCT5,MYC,RPA1,DCLRE1B,DHX36,HUS1,GNL3L,NHP2,RAD51C,ATM,PARN,RECQL4,AURKB,MCRS1,NSMCE2,GNL3,RPA2,HNRNPA1,NBN,HNRNPC,PNKP,GAR1,BLM,CCT8,HSP90AB1,TERF1,NOP10,WRAP53,ZSCAN4C,XRCC5,PRKDC,PINX1,NEK2,SMG7,CCNE1,SMG5,NAF1,CTC1,MAPK1,ZSCAN4F,PPP1R10…
regulation of cell cycle	GO:0051726	2.94639e-32	31.5307	1025	2742	277	21272	OXSR1,PNPT1,PRPF19,RAD9A,PPP2R1A,PPP2CA,CLTC,FEN1,BCCIP,HNRNPU,XRCC3,SMC5,STK11,MRE11A,NUBP1,RACGAP1,DDX3X,ZW10,RAD51D,ACTB,APEX1,BIRC5,PCID2,SOX2,SDE2,RCC1,INTS3,BOP1,TARDBP,CDK7,WDR12,TOP2A,ANAPC1,LSM11,DBF4,ANAPC11,SIN3A,ERCC2,ATR,CHEK1,RAE1,BUB3,MDM4,NLE1,RFWD3,TUBG1,SMC3,BAP1,TIPRL,RPRD1B,INCENP,DDB1,RNASEH2B,LSM10,DNA2,CUL3,SENP6,KNTC1,NANOG,CDC16,THOC1,CDC73,STAT3,SRSF5,MNAT1,KIF20B,RAD1,H…
establishment of protein localization to organelle	GO:0072594	3.60488e-32	31.4431	419	2742	153	21272	ZPR1,PPP2CA,IPO13,TIMM17A,TIMM10,TIMM50,IPO7,HSPA4,SRP72,CCT7,TOMM22,VPS25,RUVBL2,HDAC3,CCT2,MFN2,TCP1,MBTPS1,TNPO3,NUP85,SNF8,TARDBP,POLA2,GOSR2,NXT1,RBM22,DNAJC15,PIH1D1,NUP88,DKC1,RAN,SEC61A1,SRP19,PMPCB,TIMM44,PAM16,CCT3,SNUPN,CCT4,COX18,STAT3,HEATR3,TRIM28,ECT2,SRP9,PHB2,GRPEL1,CCT5,RAB7,PEX12,MIPEP,CHCHD4,NUTF2,NDUFA13,AIFM1,ROMO1,WRB,MTCH2,PMPCA,PEX10,IPO4,CDK1,TIMM9,SRP68,SPCS2,NUP50,PIK3…
telomere organization	GO:0032200	1.24919e-31	30.9034	129	2742	76	21272	RTEL1,HNRNPU,XRCC3,SMC6,SMC5,TELO2,MRE11A,RAD50,CCT7,CCT2,RAD51D,TCP1,RAD51,APEX1,TEN1,ERCC4,PCNA,EXOSC10,UPF1,XRCC6,DKC1,RIF1,DNA2,CCT3,CCT4,SMG1,NAT10,TINF2,CCT5,MYC,RPA1,DCLRE1B,DHX36,HUS1,GNL3L,NHP2,RAD51C,ATM,PARN,RECQL4,AURKB,MCRS1,NSMCE2,GNL3,RPA2,HNRNPA1,NBN,HNRNPC,PNKP,GAR1,BLM,CCT8,HSP90AB1,TERF1,NOP10,WRAP53,ZSCAN4C,XRCC5,PRKDC,PINX1,NEK2,SMG7,CCNE1,SMG5,NAF1,CTC1,MAPK1,ZSCAN4F,PPP1R10…
establishment of RNA localization	GO:0051236	5.56261e-31	30.2547	170	2742	88	21272	PNPT1,THOC3,EIF6,HNRNPU,PABPN1,NUP43,NCBP1,LRPPRC,PCID2,NUP85,NCBP2,SRSF1,ABCE1,NXT1,ATR,RAE1,NUP88,RAN,PHAX,SRSF3,THOC6,RRS1,ALYREF,MAGOH,SNUPN,SDAD1,THOC1,SSB,SRSF7,AHCTF1,LSG1,ENY2,NUTF2,NOL6,SARNP,NMD3,NUP50,MRPL18,NUP93,NUP107,XPO1,SETD2,SEC13,NUP214,ATM,NUP160,POLR2D,ZC3H3,YBX1,THOC5,NUPL1,HNRNPA1,GLE1,RPS15,THOC2,POLDIP3,ZFP36L1,TERF1,NUP153,EIF4A3,TPR,NPM1,MCM3AP,NSUN2,RBM8A,NXF1,NUP155,T…
regulation of translation	GO:0006417	3.41683e-30	29.4664	351	2742	134	21272	EEFSEC,METTL14,MTG2,SEPSECS,DPH5,TYMS,EIF2S3X,EIF6,DPH6,NSUN3,DPH2,NCBP1,LRPPRC,MTG1,DPH3,DDX3X,TSFM,TRUB2,DHX29,EIF3K,EIF3D,NCBP2,EIF2B1,TARDBP,DHFR,EEF2,MRPS27,UPF1,RPL10,EIF5,EIF3C,RPUSD4,CNOT3,AARS,CNOT10,RPL5,MAGOH,RPS4X,EIF2B2,ILF3,STAT3,TRIM71,PUS7,UQCC2,RPLP1,HNRNPL,SRP9,NAT10,GEMIN5,RPL30,MALSU1,EIF4G2,DHX36,EIF2B5,EIF2S1,RPS9,NGDN,SARNP,EIF4E2,USP16,RPS3,ETF1,EP300,NSUN4,CNOT8,METTL16,E…
cytoplasmic translation	GO:0002181	9.69601e-30	29.0134	99	2742	64	21272	DPH5,EIF2S3X,RPLP0,DPH6,DPH2,EIF3F,DPH3,HSPA14,DHX29,EIF3K,EIF3D,EIF3A,EEF2,EIF5,EIF3C,AARS,EIF3I,RPL8,RPS2,EIF2B3,RPL29,EIF3H,RPLP1,EIF3L,RPL30,RPL19,DHX36,RPL6,RPL18,RPL11,RPS26,RPL24,ETF1,RPSA,RPL32,EIF4A1,RPL39,RPL10A,EIF3E,RPS21,RPL38,RPL36,DRG1,RPL26,RPL35A,EIF3B,RPL18A,RPS28,RPL31,EIF3G,RPS23,RPS29,GSPT1,RPL9,EIF3M,DPH1,DNAJC24,RPL15,EIF3J1,RPL22L1,ZC3H15,METTL3,EIF2S2,RWDD1
ribosome assembly	GO:0042255	1.46274e-29	28.8348	61	2742	49	21272	SBDS,EIF6,RPLP0,DDX3X,DHX29,RSL24D1,MRTO4,BOP1,MRPS2,NLE1,MDN1,RPL10,RPL12,DDX28,ERAL1,RPL5,RRS1,RRP7A,PPAN,MRPL11,RPS2,RPF2,RPS27,ABT1,RPL6,RPS10,RPL11,PWP2,RPL24,NSUN4,RPSA,RPS25,DHX30,RPL38,SURF6,MTERF3,RPL23A,MRPS7,RPS15,RPS19,MRPL20,RPS14,NIP7,RPS28,RPL3,MPV17L2,MTERF4,BRIX1,MRPL22
cellular response to stress	GO:0033554	3.78468e-29	28.422	1825	2742	410	21272	OXSR1,PNPT1,PRPF19,RAD9A,UBA1,FEN1,VHL,BCCIP,TXN1,MIOS,MCM4,FANCL,RTEL1,XRCC3,SMC6,SMC5,SCAP,G6PDX,PRMT1,DDX5,CDC37,STK11,LETM1,SMC2,PYROXD1,MAX,MRE11A,RAD50,PSMD14,HDAC1,TRIAP1,FANCA,RFC2,ASCC3,HSPA14,REV1,DDX3X,RUVBL2,GINS2,HSPA9,IGBP1,MMS22L,OPA1,PPP4C,RBX1,MCM2,HDAC3,MFN2,POLD2,RAD51D,LARS,RAD51,LIG3,APEX1,INTS3,MCM7,QARS,ACTR2,ERCC4,TPT1,PCNA,CDK7,SPOP,RFC5,TOP2A,DHFR,EEF2,RNASEH2A,SIN3A,MMS…
nucleic acid transport	GO:0050657	3.82753e-29	28.4171	167	2742	85	21272	PNPT1,THOC3,EIF6,HNRNPU,PABPN1,NUP43,NCBP1,LRPPRC,PCID2,NUP85,NCBP2,SRSF1,ABCE1,NXT1,RAE1,NUP88,RAN,PHAX,SRSF3,THOC6,RRS1,ALYREF,MAGOH,SNUPN,SDAD1,THOC1,SSB,SRSF7,AHCTF1,LSG1,ENY2,NUTF2,NOL6,SARNP,NMD3,NUP50,MRPL18,NUP93,NUP107,XPO1,SETD2,SEC13,NUP214,NUP160,POLR2D,ZC3H3,YBX1,THOC5,NUPL1,HNRNPA1,GLE1,RPS15,THOC2,POLDIP3,ZFP36L1,NUP153,EIF4A3,TPR,NPM1,MCM3AP,NSUN2,RBM8A,NXF1,NUP155,TSC1,KHSRP,IWS1…
RNA transport	GO:0050658	3.82753e-29	28.4171	167	2742	85	21272	PNPT1,THOC3,EIF6,HNRNPU,PABPN1,NUP43,NCBP1,LRPPRC,PCID2,NUP85,NCBP2,SRSF1,ABCE1,NXT1,RAE1,NUP88,RAN,PHAX,SRSF3,THOC6,RRS1,ALYREF,MAGOH,SNUPN,SDAD1,THOC1,SSB,SRSF7,AHCTF1,LSG1,ENY2,NUTF2,NOL6,SARNP,NMD3,NUP50,MRPL18,NUP93,NUP107,XPO1,SETD2,SEC13,NUP214,NUP160,POLR2D,ZC3H3,YBX1,THOC5,NUPL1,HNRNPA1,GLE1,RPS15,THOC2,POLDIP3,ZFP36L1,NUP153,EIF4A3,TPR,NPM1,MCM3AP,NSUN2,RBM8A,NXF1,NUP155,TSC1,KHSRP,IWS1…
nuclear transport	GO:0051169	3.95699e-29	28.4026	316	2742	124	21272	ZPR1,PPP2CA,IPO13,THOC3,TXN1,EIF6,PABPN1,IPO7,NCBP1,HSPA9,HDAC3,MBTPS1,PCID2,TNPO3,NUP85,NCBP2,TARDBP,POLA2,ABCE1,NXT1,RBM22,RAE1,NUP88,RAN,PHAX,SRSF3,THOC6,RRS1,ALYREF,SNUPN,SDAD1,THOC1,STAT3,HEATR3,SSB,TRIM28,NUPL2,ECT2,PHB2,LSG1,ENY2,CHCHD4,NUTF2,NOL6,SARNP,IPO4,NUP205,CDK1,NMD3,NUP50,PIK3R2,KPNB1,EP300,RANGAP1,KPNA2,NUP93,NUP107,XPO1,NF1,SETD2,DMAP1,NUP214,NUP160,ANP32B,POLR2D,NOLC1,CSE1L,THO…
nucleocytoplasmic transport	GO:0006913	3.95699e-29	28.4026	316	2742	124	21272	ZPR1,PPP2CA,IPO13,THOC3,TXN1,EIF6,PABPN1,IPO7,NCBP1,HSPA9,HDAC3,MBTPS1,PCID2,TNPO3,NUP85,NCBP2,TARDBP,POLA2,ABCE1,NXT1,RBM22,RAE1,NUP88,RAN,PHAX,SRSF3,THOC6,RRS1,ALYREF,SNUPN,SDAD1,THOC1,STAT3,HEATR3,SSB,TRIM28,NUPL2,ECT2,PHB2,LSG1,ENY2,CHCHD4,NUTF2,NOL6,SARNP,IPO4,NUP205,CDK1,NMD3,NUP50,PIK3R2,KPNB1,EP300,RANGAP1,KPNA2,NUP93,NUP107,XPO1,NF1,SETD2,DMAP1,NUP214,NUP160,ANP32B,POLR2D,NOLC1,CSE1L,THO…
regulation of cellular biosynthetic process	GO:0031326	4.04485e-29	28.3931	4066	2742	761	21272	EEFSEC,HIST1H2AE,HIST1H2AN,METTL14,MTG2,ZPR1,SEPSECS,PPP2CA,CLTC,VHL,DPH5,KAT8,DR1,TXN1,L3MBTL2,ELP3,TYMS,EIF2S3X,EIF6,HNRNPU,ATP1A1,SCAP,PRMT1,DDX5,POU5F1,NR0B1,STK11,DNAJC2,MAX,NELFB,MED26,TFRC,DPH6,MED20,UXT,NSUN3,DPH2,NCBP1,HDAC1,LRPPRC,DHX33,NEDD8,MED12,SMARCC1,TRIAP1,FANCA,SMARCE1,MTG1,CCT7,RFC2,ORC5,DPH3,CTCF,GTF2B,DDX3X,VPS72,ZFP281,RUVBL2,ACTR3,IGBP1,CIAO1,TSFM,MRPL12,TRUB2,PFDN5,NAA15,H…
mitochondrion organization	GO:0007005	4.63529e-29	28.3339	488	2742	163	21272	HSD17B10,PNPT1,NDUFAF7,MRPL15,NUBPL,SCO2,NDUFA8,CLUH,NDUFA3,MRPL17,TIMM17A,TMEM11,TIMM10,TIMM50,PET117,CDC37,LETM1,ATAD3A,HSPA4,VDAC1,TRIAP1,NDUFA2,TOMM22,NDUFAF6,OPA1,MFN2,SSBP1,DNAJC11,DAP3,MFN1,TMEM126B,MRPL39,ACAD9,NDUFC1,TMEM70,NDUFB9,PARP1,DNAJC15,DNAJA3,COX10,DNM1L,FXN,PMPCB,NDUFS7,COA5,NDUFA1,TIMM44,STOML2,PAM16,DNA2,NDUFA6,NDUFS8,NDUFS1,COX18,HUWE1,DCTN6,STAT3,PHB,GABPB1,NDUFA11,UQCC2,NR…
DNA recombination	GO:0006310	1.16504e-28	27.9337	278	2742	114	21272	MCM4,RTEL1,XRCC3,SMC6,SMC5,TFRC,MRE11A,PSMD14,RUVBL2,GINS2,MMS22L,PPP4C,MCM2,RAD51D,RAD51,LIG3,APEX1,MCM7,ACTR2,ERCC4,TOP2A,MMS19,ERCC2,PARP1,UBE2N,CHEK1,RFWD3,RIF1,EXOSC3,LIG4,SMARCAD1,THOC1,RNF8,LIG1,FIGNL1,SUPV3L1,TIMELESS,RPA1,MCM9,HUS1,TOPBP1,ACTL6A,TONSL,SETD2,HSPD1,RAD51C,ATM,SWSAP1,HMGB2,RUVBL1,RECQL4,FANCM,HMGB1,MCRS1,NSMCE2,RPA2,NSMCE4A,XRCC2,UCHL5,RBBP8,POLB,FANCD2,ACTR8,MCM6,NBN,RAD54…
regulation of biosynthetic process	GO:0009889	3.64376e-28	27.4385	4146	2742	769	21272	EEFSEC,HIST1H2AE,HIST1H2AN,FDPS,METTL14,MTG2,ZPR1,SEPSECS,PPP2CA,CLTC,VHL,DPH5,KAT8,DR1,TXN1,L3MBTL2,ELP3,TYMS,EIF2S3X,EIF6,HNRNPU,ATP1A1,SCAP,PRMT1,DDX5,POU5F1,NR0B1,STK11,DNAJC2,MAX,NELFB,MED26,TFRC,DPH6,MED20,UXT,NSUN3,DPH2,NCBP1,HDAC1,LRPPRC,DHX33,NEDD8,MED12,SMARCC1,TRIAP1,FANCA,SMARCE1,MTG1,CCT7,RFC2,ORC5,DPH3,CTCF,GTF2B,DDX3X,VPS72,ZFP281,RUVBL2,ACTR3,IGBP1,CIAO1,TSFM,MRPL12,TRUB2,PFDN5,NA…
double-strand break repair	GO:0006302	4.19517e-28	27.3773	230	2742	101	21272	PRPF19,MCM4,RTEL1,XRCC3,SMC5,MRE11A,PSMD14,GINS2,MMS22L,PPP4C,MCM2,RAD51D,RAD51,LIG3,MCM7,ACTR2,ERCC4,MMS19,PARP1,UBE2N,CHEK1,XRCC6,RFWD3,RIF1,LIG4,DNA2,KAT5,SMARCAD1,RNF8,FIGNL1,DDX11,TIMELESS,RPA1,FH1,DCLRE1B,MCM9,HUS1,VCP,TONSL,KDM2A,SETD2,RAD51C,ATM,SWSAP1,ESCO2,FANCM,ACTR5,NSMCE2,RPA2,XRCC2,RBBP8,POLB,FANCD2,ACTR8,MCM6,NBN,PNKP,RAD54L,DDX1,OTUB1,BLM,BRCA1,POLQ,INO80,CDC7,KDM1A,WRAP53,MCM5,BA…
DNA-templated transcription, initiation	GO:0006352	6.38477e-28	27.1949	119	2742	69	21272	GTF3C1,DR1,POU5F1,CRCP,MED12,GTF2B,GTF2A1,HIST1H4H,PIH1D1,GTF2E2,SMARCA4,UBTF,BRF2,POLR3H,POLR2I,SNAPC5,GTF2F1,PSMC5,GTF2E1,TBP,PSMC6,HIST1H4N,TAF1C,BCLAF1,PSMC4,MYC,MED30,DHX36,ERCC3,HIST1H4M,MED14,MED24,TFB2M,HIST1H4B,GTF2A2,MED4,CAND1,TAF5,HIST1H4A,TTF1,BRF1,POLR2D,SMARCB1,HIST1H4F,MED16,PSMC2,POLR2G,TAF6,SMARCA5,PSMC3,TAF2,GTF3C5,HIST1H4J,HIST1H4K,MED17,TAF7,HIST1H4D,TAF6L,TAF1B,RRN3,PAXIP1,B…
intracellular transport	GO:0046907	1.25085e-27	26.9028	1458	2742	343	21272	NSF,ATP5A1,VPS29,ZPR1,PPP2CA,CLTC,IPO13,THOC3,NRBP1,TXN1,EIF6,HNRNPU,TIMM17A,TIMM10,TIMM50,PABPN1,YKT6,IPO7,HSPA4,TRAPPC5,NCBP1,SRP72,TOMM22,VPS25,ACTR3,HSPA9,ZW10,ARF1,HDAC3,MFN2,TRAPPC1,MBTPS1,PCID2,TNPO3,NAPA,NUP85,ACTR2,NCBP2,SNF8,TARDBP,POLA2,GOSR2,ARPC2,ABCE1,NXT1,RBM22,DNAJC15,RAE1,NUP88,RAN,SEC61A1,DNM1L,ARFRP1,SRP19,PHAX,PMPCB,VPS11,SRSF3,TIMM44,THOC6,RRS1,STOML2,ALYREF,ARCN1,DYNC1I2,PAM…
regulation of nucleobase-containing compound metabolic process	GO:0019219	1.55717e-27	26.8077	3874	2742	726	21272	PNPT1,HIST1H2AE,HIST1H2AN,PRPF19,METTL14,ZPR1,PRMT5,PPP2CA,VHL,KAT8,DR1,TXN1,L3MBTL2,RIOK1,ELP3,DDX49,EIF6,RTEL1,HNRNPU,SCAP,DDX5,POU5F1,NR0B1,DNAJC2,MAX,NELFB,MED26,TFRC,MRE11A,MED20,UXT,NCBP1,HDAC1,LRPPRC,SF3B4,DHX33,NEDD8,MED12,SMARCC1,TRIAP1,FANCA,SMARCE1,CCT7,RFC2,RNF40,CTCF,GTF2B,DDX3X,VPS72,ZFP281,RUVBL2,ACTR3,IGBP1,CIAO1,MRPL12,PPP4C,PFDN5,NAA15,HDAC3,CCT2,TRAIP,EAF1,DIMT1,KDM8,TCP1,RAD51…
covalent chromatin modification	GO:0016569	4.05661e-27	26.3918	472	2742	156	21272	VRK1,WDR82,PRMT5,KAT8,DR1,L3MBTL2,PRMT1,POU5F1,SKP1A,HDAC1,RNF40,CTCF,GTF2B,RUVBL2,HDAC3,KDM8,SETD5,NCOA3,JMJD6,SIN3A,TADA1,UBE2N,PIH1D1,CHEK1,POLE3,PWP1,RIF1,SETDB1,YEATS4,SMARCA4,BAP1,CXXC1,INCENP,DDB1,KAT5,FAM208A,SMARCAD1,HUWE1,GTF3C4,CDC73,RNF8,PHB,DNMT1,TRIM28,CTR9,MEAF6,PAF1,BRD4,WAC,CUL4B,KMT2B,KANSL3,ENY2,FH1,ZFP335,SUDS3,BRPF1,TRRAP,WDR5,RTF1,CDK1,USP16,PRDM14,UHRF1,EP300,MED24,ACTL6A,U…
cellular macromolecule localization	GO:0070727	6.17144e-27	26.2096	1782	2742	396	21272	PRPF19,NSF,VPS29,ZPR1,PPP2CA,CLTC,VHL,IPO13,THOC3,PPIL2,TXN1,MIOS,EIF6,HNRNPU,TIMM17A,TIMM10,TIMM50,PABPN1,LAMTOR4,STK11,SKP1A,IPO7,HSPA4,TFRC,NCBP1,NUBP1,SRP72,CENPA,CCT7,CTCF,TOMM22,VPS25,DDX3X,RUVBL2,ACTR3,HSPA9,ZW10,ARF1,HDAC3,CCT2,MFN2,TCP1,MBTPS1,ACTB,PCID2,TNPO3,NAPA,NUP85,SNF8,TARDBP,POLA2,GOSR2,ARPC2,ABCE1,NXT1,SIN3A,RBM22,HNRNPK,EXOSC10,PARP1,ATR,DNAJC15,PIH1D1,RAE1,BUB3,NUP88,DKC1,RAN,…
cellular macromolecule catabolic process	GO:0044265	9.15246e-27	26.0385	1054	2742	269	21272	PNPT1,PRPF19,METTL14,ZPR1,UBA1,FEN1,VHL,SKIV2L,DDX49,HNRNPU,DDX5,CLPP,COPS3,SKP1A,PSMD14,NCBP1,LRPPRC,NEDD8,SMARCC1,RNF40,VPS25,RBX1,APEX1,PSMB6,PCID2,PELO,PABPC1,MRTO4,NCBP2,SNF8,TARDBP,SPOP,ANAPC1,LSM2,RNASEH2A,ANAPC11,LSM7,EXOSC10,UBE2N,ARIH1,UPF1,DKC1,PSMA1,PSMD2,DIS3,EXOSC3,PDCL3,PSMA6,BAP1,PSMA5,CNOT3,VPS11,CNOT10,RPL5,DDB1,RNASEH2B,FASTKD1,MAGOH,PAM16,DNA2,CUL3,KAT5,PSMC5,HUWE1,PSMC1,CDC16…
regulation of cellular metabolic process	GO:0031323	1.59214e-26	25.798	6155	2742	1050	21272	OXSR1,PKMYT1,PNPT1,EEFSEC,HIST1H2AE,HIST1H2AN,PRPF19,NSF,METTL14,MTG2,PPP2R1A,ZPR1,PRMT5,SEPSECS,PPP2CA,CLTC,VHL,DPH5,BCCIP,CHMP6,KAT8,DR1,TXN1,L3MBTL2,RIOK1,ELP3,TYMS,EIF2S3X,DDX49,EIF6,RTEL1,HNRNPU,TIMM17A,ATP1A1,SCAP,G6PDX,PRMT1,DDX5,CDC37,POU5F1,NR0B1,STK11,TELO2,DNAJC2,MAX,NELFB,MED26,TFRC,DPH6,MRE11A,MED20,PSMD14,UXT,NSUN3,DPH2,NCBP1,HDAC1,LRPPRC,VDAC1,SF3B4,DHX33,NEDD8,MED12,SMARCC1,TRIAP1…
mitochondrial respiratory chain complex assembly	GO:0033108	1.63474e-26	25.7866	82	2742	55	21272	NDUFAF7,NUBPL,SCO2,NDUFA8,NDUFA3,PET117,NDUFA2,NDUFAF6,TMEM126B,ACAD9,NDUFC1,NDUFB9,NDUFS7,COA5,NDUFA1,NDUFA6,NDUFS8,COX18,NDUFA11,UQCC2,NDUFB8,COX17,NDUFAF4,CHCHD4,NDUFAB1,NDUFA13,AIFM1,NDUFB7,NDUFB10,NDUFB6,FOXRED1,SCO1,UQCR10,NDUFAF5,NDUFA5,UQCC1,NDUFA10,NDUFB4,SAMM50,COX20,NDUFB5,FASTKD3,NDUFB11,OXA1L,COA4,NDUFB2,NDUFB3,COX14,TFAM,UQCC3,COX19,COX16,PET100,TACO1,NDUFC2
regulation of cell cycle process	GO:0010564	2.98333e-26	25.5253	595	2742	180	21272	PPP2R1A,CLTC,FEN1,HNRNPU,XRCC3,SMC5,MRE11A,NUBP1,RACGAP1,DDX3X,ZW10,APEX1,BIRC5,PCID2,SDE2,RCC1,ANAPC1,LSM11,DBF4,ANAPC11,SIN3A,ERCC2,CHEK1,RAE1,BUB3,MDM4,RFWD3,TUBG1,SMC3,RPRD1B,INCENP,DDB1,RNASEH2B,LSM10,CUL3,SENP6,CDC16,CDC73,KIF20B,RAD1,MYBBP1A,ECT2,AHCTF1,PHB2,DDX11,PAF1,KIF11,ECD,BRD4,BIRC6,CUL4B,KIF23,CDC23,HUS1,E4F1,PRPF40A,CDT1,PIK3C3,ERCC3,CDK1,NUMA1,RANBP1,RPTOR,BORA,TPX2,CHMP3,TOPBP1,…
RNA 3'-end processing	GO:0031123	7.75838e-26	25.1102	98	2742	60	21272	HSD17B10,PNPT1,CPSF3,PABPN1,CPSF1,NCBP1,CPSF2,CLP1,RNF40,NCBP2,SSU72,LSM11,EXOSC10,DKC1,FIP1L1,EXOSC3,INTS8,POLR3K,RPRD1B,TUT1,CDC73,NUDT21,SSB,EXOSC2,CTR9,PAF1,SUPV3L1,PTCD1,DHX36,MTPAP,EXOSC5,SUPT5,EXOSC8,EXOSC7,INTS5,CDK9,INTS6,RNF20,RPS21,TOE1,PARN,CPSF4,POLR2D,WDR33,ZC3H3,ELAC2,CSTF2,TRMT10C,ZFP36L1,EXOSC4,NELFE,CSTF3,TRNT1,USB1,FBL,PCF11,SLBP,INTS1,CCNB1,CCNT1
intracellular protein transport	GO:0006886	1.22839e-25	24.9107	955	2742	248	21272	NSF,VPS29,ZPR1,PPP2CA,CLTC,IPO13,THOC3,TXN1,EIF6,HNRNPU,TIMM17A,TIMM10,TIMM50,PABPN1,IPO7,HSPA4,NCBP1,SRP72,TOMM22,VPS25,ACTR3,HSPA9,ARF1,HDAC3,MFN2,MBTPS1,PCID2,TNPO3,NAPA,NUP85,SNF8,TARDBP,POLA2,GOSR2,ARPC2,ABCE1,NXT1,RBM22,DNAJC15,RAE1,NUP88,RAN,SEC61A1,ARFRP1,SRP19,PMPCB,VPS11,SRSF3,TIMM44,THOC6,RRS1,PAM16,SNUPN,COX18,SDAD1,THOC1,STAT3,HEATR3,SSB,KIF20B,TRIM28,NUPL2,ECT2,SRP9,PHB2,GRPEL1,FAF2…
cellular protein localization	GO:0034613	1.47814e-25	24.8303	1772	2742	390	21272	PRPF19,NSF,VPS29,ZPR1,PPP2CA,CLTC,VHL,IPO13,THOC3,PPIL2,TXN1,MIOS,EIF6,HNRNPU,TIMM17A,TIMM10,TIMM50,PABPN1,LAMTOR4,STK11,SKP1A,IPO7,HSPA4,TFRC,NCBP1,NUBP1,SRP72,CENPA,CCT7,CTCF,TOMM22,VPS25,DDX3X,RUVBL2,ACTR3,HSPA9,ZW10,ARF1,HDAC3,CCT2,MFN2,TCP1,MBTPS1,ACTB,PCID2,TNPO3,NAPA,NUP85,SNF8,TARDBP,POLA2,GOSR2,ARPC2,ABCE1,NXT1,SIN3A,RBM22,HNRNPK,PARP1,ATR,DNAJC15,PIH1D1,RAE1,BUB3,NUP88,DKC1,RAN,SEC61A1,…
regulation of mitotic cell cycle	GO:0007346	3.38339e-25	24.4706	537	2742	166	21272	OXSR1,PNPT1,RAD9A,CLTC,HNRNPU,XRCC3,SMC5,MRE11A,DDX3X,ZW10,APEX1,BIRC5,PCID2,RCC1,INTS3,TOP2A,ANAPC1,LSM11,DBF4,ANAPC11,SIN3A,ERCC2,CHEK1,RAE1,BUB3,NLE1,RFWD3,TUBG1,SMC3,INCENP,DDB1,RNASEH2B,LSM10,CUL3,KNTC1,NANOG,CDC16,CDC73,KIF20B,PHB2,KIF11,ECD,BRD4,CUL4B,MYC,DCLRE1B,CDC23,HUS1,E4F1,CDT1,ERCC3,CDK1,NUMA1,RPL24,RANBP1,RPTOR,BORA,TIPIN,TPX2,TOPBP1,PLK1,UBE2C,RPS6,POLDIP2,RAD51C,ATM,DONSON,ANP32B…
regulation of cellular amide metabolic process	GO:0034248	6.66513e-25	24.1762	403	2742	137	21272	EEFSEC,METTL14,MTG2,SEPSECS,DPH5,TYMS,EIF2S3X,EIF6,DPH6,NSUN3,DPH2,NCBP1,LRPPRC,MTG1,DPH3,DDX3X,TSFM,TRUB2,DHX29,EIF3K,EIF3D,NCBP2,EIF2B1,TARDBP,DHFR,EEF2,PGAM1,MRPS27,UPF1,RPL10,EIF5,EIF3C,RPUSD4,CNOT3,AARS,CNOT10,RPL5,MAGOH,RPS4X,EIF2B2,ILF3,STAT3,TRIM71,PUS7,UQCC2,RPLP1,HNRNPL,SRP9,NAT10,GEMIN5,RPL30,MALSU1,EIF4G2,DHX36,EIF2B5,EIF2S1,RPS9,NGDN,SARNP,EIF4E2,USP16,RPS3,ETF1,EP300,NSUN4,CNOT8,MET…
positive regulation of chromosome organization	GO:2001252	8.98313e-25	24.0466	190	2742	86	21272	FEN1,L3MBTL2,RTEL1,HNRNPU,SMC5,MRE11A,CCT7,RNF40,RUVBL2,CCT2,SSBP1,TCP1,ANAPC11,SIN3A,UBE2N,PIH1D1,DKC1,RIF1,SETDB1,LIG4,CCT3,CUL3,FAM208A,CCT4,CDC16,DNMT1,TRIM28,GTF2H2,CTR9,DDX11,PAF1,CCT5,BRD4,DHX36,CDT1,WDR5,RTF1,NUMA1,EP300,NELFA,CDK9,JARID2,MPHOSPH8,RNF20,ATM,PARN,MTF2,SMARCB1,CDC27,AURKB,OGT,NSMCE2,GNL3,HNRNPA1,KAT7,NBN,PNKP,CCT8,BECN1,BRCA1,TERF1,KDM1A,WDR61,ANAPC4,TPR,NELFE,NIPBL,XRCC5,E…
histone modification	GO:0016570	1.51269e-24	23.8202	457	2742	148	21272	VRK1,WDR82,PRMT5,KAT8,DR1,L3MBTL2,PRMT1,SKP1A,HDAC1,RNF40,CTCF,GTF2B,RUVBL2,HDAC3,KDM8,SETD5,NCOA3,JMJD6,SIN3A,TADA1,UBE2N,PIH1D1,CHEK1,POLE3,PWP1,RIF1,SETDB1,YEATS4,SMARCA4,BAP1,CXXC1,INCENP,DDB1,KAT5,SMARCAD1,HUWE1,GTF3C4,CDC73,RNF8,PHB,DNMT1,CTR9,MEAF6,PAF1,BRD4,WAC,CUL4B,KMT2B,KANSL3,ENY2,FH1,ZFP335,SUDS3,BRPF1,TRRAP,WDR5,RTF1,CDK1,USP16,PRDM14,UHRF1,EP300,MED24,ACTL6A,USP36,NELFA,MORF4L2,CDK…
regulation of nitrogen compound metabolic process	GO:0051171	2.37854e-24	23.6237	5814	2742	992	21272	OXSR1,PNPT1,EEFSEC,HIST1H2AE,HIST1H2AN,PRPF19,NSF,METTL14,MTG2,PPP2R1A,ZPR1,PRMT5,SEPSECS,PPP2CA,CLTC,VHL,DPH5,BCCIP,CHMP6,KAT8,DR1,TXN1,L3MBTL2,RIOK1,ELP3,TYMS,EIF2S3X,DDX49,EIF6,RTEL1,HNRNPU,TIMM17A,SCAP,G6PDX,PRMT1,DDX5,CDC37,POU5F1,NR0B1,STK11,TELO2,DNAJC2,MAX,NELFB,MED26,TFRC,DPH6,MRE11A,MED20,PSMD14,UXT,NSUN3,DPH2,NCBP1,HDAC1,LRPPRC,SF3B4,DHX33,NEDD8,MED12,SMARCC1,TRIAP1,ATP6V0C,FANCA,SMARC…
RNA catabolic process	GO:0006401	2.42329e-24	23.6156	247	2742	100	21272	PNPT1,METTL14,ZPR1,FEN1,SKIV2L,DDX49,HNRNPU,DDX5,NCBP1,LRPPRC,APEX1,PCID2,PELO,PABPC1,MRTO4,NCBP2,TARDBP,LSM2,RNASEH2A,LSM7,EXOSC10,UPF1,DKC1,DIS3,EXOSC3,CNOT3,CNOT10,RNASEH2B,FASTKD1,MAGOH,DNA2,SMG1,TRIM71,SSB,EXOSC2,SUPV3L1,RNASEH2C,DHX36,LSM6,MTPAP,EXOSC5,ETF1,EXOSC8,SKIV2L2,EXOSC7,CNOT8,DROSHA,METTL16,EIF3E,PRPF18,ATM,PARN,POLR2D,YBX1,PDE12,POLR2G,POP1,LSM5,HNRNPC,DICER1,ZFP36L1,EXOSC4,EIF4A3…
positive regulation of nucleobase-containing compound metabolic process	GO:0045935	2.66567e-24	23.5742	1851	2742	399	21272	PNPT1,PRPF19,METTL14,ZPR1,VHL,KAT8,DR1,RIOK1,RTEL1,HNRNPU,SCAP,DDX5,POU5F1,DNAJC2,MAX,TFRC,MRE11A,MED20,NCBP1,HDAC1,SF3B4,DHX33,MED12,SMARCC1,TRIAP1,CCT7,RFC2,CTCF,GTF2B,DDX3X,ZFP281,RUVBL2,ACTR3,IGBP1,MRPL12,NAA15,HDAC3,CCT2,EAF1,DIMT1,KDM8,TCP1,RAD51,NACA,APEX1,PCID2,SOX2,ELL,PABPC1,NUP85,MED10,ACTR2,NCBP2,TARDBP,NCOA3,PCNA,CDK7,RFC5,JMJD6,TOP2A,SRSF1,ILF2,SIN3A,MMS19,TADA1,ERCC2,RBM22,HNRNPK,P…
protein localization to chromosome	GO:0034502	6.92016e-24	23.1599	83	2742	53	21272	CENPA,CCT7,CTCF,RUVBL2,ZW10,CCT2,TCP1,ATR,PIH1D1,BUB3,DKC1,CCT3,FAM208A,CCT4,MIS12,TINF2,CCT5,RPA1,MCM9,CDT1,CDK1,GNL3L,PLK1,CHAMP1,SETD2,ESCO2,SPDL1,AURKB,GNL3,RPA2,CCT8,TERF1,EZH2,WRAP53,LEMD2,NIPBL,MTBP,MAU2,PINX1,CARM1,NDC80,IK,CDCA5,MSH2,TTK,BRCA2,CHMP7,RAD21,ATRX,MCM8,TERF2,CENPQ,ACD
regulation of macromolecule metabolic process	GO:0060255	7.68522e-24	23.1143	6399	2742	1071	21272	OXSR1,PNPT1,EEFSEC,HIST1H2AE,HIST1H2AN,PRPF19,NSF,METTL14,MTG2,PPP2R1A,ZPR1,PRMT5,SEPSECS,PPP2CA,CLTC,VHL,DPH5,BCCIP,CHMP6,KAT8,DR1,TXN1,SKIV2L,L3MBTL2,RIOK1,ELP3,TYMS,EIF2S3X,DDX49,EIF6,RTEL1,HNRNPU,TIMM17A,SCAP,G6PDX,PRMT1,DDX5,CDC37,POU5F1,NR0B1,STK11,TELO2,DNAJC2,MAX,NELFB,MED26,TFRC,FAM98B,DPH6,MRE11A,MED20,PSMD14,UXT,NSUN3,DPH2,NCBP1,HDAC1,LRPPRC,SF3B4,DHX33,NEDD8,MED12,SMARCC1,TRIAP1,ATP6V…
mitotic cell cycle phase transition	GO:0044772	8.36993e-24	23.0773	362	2742	126	21272	ZPR1,XRCC3,MRE11A,DDX3X,ZW10,KDM8,APEX1,BIRC5,PCID2,RCC1,ANAPC1,LSM11,DBF4,ANAPC11,SIN3A,ERCC2,CHEK1,BUB3,RFWD3,DDB1,RNASEH2B,LSM10,CUL3,CDC16,CDC73,TRIM71,MNAT1,HINFP,POLE,E2F4,CTDP1,PHB2,ECD,BRD4,CUL4B,MASTL,USP37,CDC23,HUS1,CDT1,ERCC3,CDK1,RPL24,RPTOR,TOPBP1,PLK1,PPM1D,UBE2C,RPS6,RAD51C,ATM,CCNA2,DONSON,ANP32B,PSMG2,SPDL1,CDC27,AURKB,ANKRD17,NSMCE2,RPL26,RPA2,RBBP8,TAF2,NBN,CDK4,RAD17,BLM,BRCA…
RNA export from nucleus	GO:0006405	8.56756e-24	23.0671	92	2742	56	21272	THOC3,EIF6,PABPN1,NCBP1,PCID2,NUP85,NCBP2,ABCE1,NXT1,RAE1,NUP88,RAN,PHAX,SRSF3,THOC6,RRS1,ALYREF,SDAD1,THOC1,SSB,LSG1,ENY2,NOL6,SARNP,NMD3,NUP93,NUP107,XPO1,SETD2,NUP214,NUP160,POLR2D,THOC5,GLE1,RPS15,THOC2,POLDIP3,NUP153,TPR,NPM1,MCM3AP,NSUN2,NXF1,NUP155,TSC1,IWS1,NUP62,EIF5A,NUP133,KHDRBS1,SUPT6,NRDE2,ALKBH5,XPO5,LTV1,DDX39
regulation of metabolic process	GO:0019222	1.16459e-23	22.9338	6856	2742	1133	21272	OXSR1,PKMYT1,PNPT1,EEFSEC,HIST1H2AE,HIST1H2AN,PRPF19,FDPS,NSF,METTL14,MTG2,PPP2R1A,ZPR1,PRMT5,SEPSECS,PPP2CA,CLTC,VHL,DPH5,BCCIP,CHMP6,KAT8,DR1,TXN1,SKIV2L,L3MBTL2,RIOK1,ELP3,TYMS,EIF2S3X,DDX49,EIF6,RTEL1,HNRNPU,TIMM17A,ATP1A1,SCAP,G6PDX,PRMT1,DDX5,CDC37,POU5F1,NR0B1,STK11,TELO2,DNAJC2,MAX,NELFB,MED26,TFRC,FAM98B,DPH6,MRE11A,MED20,PSMD14,UXT,NSUN3,DPH2,NCBP1,HDAC1,LRPPRC,VDAC1,SF3B4,DHX33,NEDD8,M…
DNA duplex unwinding	GO:0032508	1.45678e-23	22.8366	81	2742	52	21272	MCM4,RTEL1,MRE11A,RFC2,ASCC3,DDX3X,RUVBL2,GINS2,MCM2,SSBP1,RAD51,MCM7,RFC5,TOP2A,ERCC2,XRCC6,RFC4,DNA2,SMARCAD1,MNAT1,RFC3,GTF2H2,DDX11,SUPV3L1,RPA1,DHX36,CHTF18,CHD8,MCM9,ERCC3,CHTF8,ERCC6L,DSCC1,RUVBL1,RECQL4,FANCM,MCM6,NBN,DDX1,BLM,POLQ,MCM5,XRCC5,CHD4,GTF2F2,BRIP1,ATRX,MCM8,MCM3,CHD1,GINS4,HELQ
macromolecule modification	GO:0043412	1.91329e-23	22.7182	3997	2742	727	21272	HSD17B10,HMBS,OXSR1,PKMYT1,VRK1,RABGGTA,PRPF19,METTL14,CTU1,PPP2R1A,GLRX5,ELP5,NDUFAF7,DOHH,UBA1,WDR82,PRMT5,PPP2CA,VHL,DPH5,BCCIP,CHMP6,KAT8,DR1,PPIL2,NRBP1,TXN1,CMTR1,FANCL,TFB1M,IKBKAP,L3MBTL2,RIOK1,ELP3,RABGGTB,TIMM50,ELP6,DPAGT1,BRAP,G6PDX,PRMT1,PABPN1,ALG13,CDC37,POU5F1,PTP4A2,DCAF7,STK11,MOCS3,COPS3,TELO2,SKP1A,TFRC,FAM98B,DPH6,MRE11A,MED20,PSMD14,NSUN3,DPH2,HDAC1,DHX33,NEDD8,MED12,TRMT61A…
double-strand break repair via homologous recombination	GO:0000724	3.29497e-23	22.4821	129	2742	67	21272	MCM4,RTEL1,XRCC3,SMC5,MRE11A,PSMD14,GINS2,MMS22L,PPP4C,MCM2,RAD51D,RAD51,MCM7,ACTR2,ERCC4,MMS19,PARP1,UBE2N,CHEK1,RFWD3,RIF1,FIGNL1,TIMELESS,RPA1,MCM9,HUS1,TONSL,SETD2,RAD51C,ATM,SWSAP1,FANCM,NSMCE2,RPA2,XRCC2,RBBP8,MCM6,NBN,RAD54L,BLM,BRCA1,POLQ,INO80,CDC7,KDM1A,WRAP53,MCM5,RMI2,NIPBL,FUS,WDR48,RPA3,CDC45,REV3L,RAD51B,XRCC1,BRCA2,ARID2,PALB2,ZSWIM7,YY1,H2AFX,MCM8,MCM3,GINS4,HELQ,SLX4
nucleobase-containing compound transport	GO:0015931	3.99278e-23	22.3987	218	2742	91	21272	PNPT1,THOC3,EIF6,HNRNPU,PABPN1,NUP43,NCBP1,LRPPRC,PCID2,NUP85,NCBP2,SRSF1,ABCE1,NXT1,RAE1,NUP88,RAN,PHAX,SRSF3,THOC6,RRS1,ALYREF,MAGOH,SNUPN,SLC35B1,SDAD1,THOC1,SSB,SRSF7,AHCTF1,SLC35A2,LSG1,ENY2,NUTF2,NOL6,SARNP,NMD3,NUP50,MRPL18,NUP93,NUP107,XPO1,SETD2,SEC13,NUP214,NUP160,POLR2D,ZC3H3,YBX1,THOC5,NUPL1,HNRNPA1,GLE1,RPS15,THOC2,POLDIP3,ZFP36L1,NUP153,EIF4A3,TPR,NPM1,MCM3AP,NSUN2,RBM8A,NXF1,NUP155…
DNA geometric change	GO:0032392	4.03175e-23	22.3945	88	2742	54	21272	MCM4,RTEL1,MRE11A,RFC2,ASCC3,DDX3X,RUVBL2,GINS2,MCM2,SSBP1,RAD51,MCM7,RFC5,TOP2A,ERCC2,XRCC6,RFC4,DNA2,SMARCAD1,MNAT1,RFC3,GTF2H2,DDX11,SUPV3L1,RPA1,DHX36,CHTF18,CHD8,MCM9,ERCC3,CHTF8,ERCC6L,DSCC1,RUVBL1,RECQL4,FANCM,HMGB1,MCM6,NBN,RAD54L,DDX1,BLM,POLQ,MCM5,XRCC5,CHD4,GTF2F2,BRIP1,ATRX,MCM8,MCM3,CHD1,GINS4,HELQ
recombinational repair	GO:0000725	5.95345e-23	22.2252	130	2742	67	21272	MCM4,RTEL1,XRCC3,SMC5,MRE11A,PSMD14,GINS2,MMS22L,PPP4C,MCM2,RAD51D,RAD51,MCM7,ACTR2,ERCC4,MMS19,PARP1,UBE2N,CHEK1,RFWD3,RIF1,FIGNL1,TIMELESS,RPA1,MCM9,HUS1,TONSL,SETD2,RAD51C,ATM,SWSAP1,FANCM,NSMCE2,RPA2,XRCC2,RBBP8,MCM6,NBN,RAD54L,BLM,BRCA1,POLQ,INO80,CDC7,KDM1A,WRAP53,MCM5,RMI2,NIPBL,FUS,WDR48,RPA3,CDC45,REV3L,RAD51B,XRCC1,BRCA2,ARID2,PALB2,ZSWIM7,YY1,H2AFX,MCM8,MCM3,GINS4,HELQ,SLX4
cell cycle phase transition	GO:0044770	6.81551e-23	22.1665	406	2742	134	21272	ZPR1,XRCC3,MRE11A,DDX3X,ZW10,KDM8,APEX1,BIRC5,PCID2,RCC1,ANAPC1,LSM11,DBF4,ANAPC11,SIN3A,ERCC2,CHEK1,BUB3,UPF1,RFWD3,DDB1,RNASEH2B,LSM10,CUL3,CDC16,CDC73,TRIM71,MNAT1,HINFP,POLE,E2F4,CTDP1,PHB2,PAF1,ECD,BRD4,CUL4B,MASTL,TIMELESS,USP37,CDC23,HUS1,CDT1,ERCC3,CDK1,RPL24,RPTOR,TIPIN,TOPBP1,PLK1,PPM1D,UBE2C,RPS6,RAD51C,ATM,CCNA2,DONSON,ANP32B,PSMG2,SPDL1,CDC27,AURKB,ANKRD17,NSMCE2,RPL26,RPA2,RBBP8,TAF…
regulation of primary metabolic process	GO:0080090	1.0806e-22	21.9663	5972	2742	1006	21272	OXSR1,PNPT1,EEFSEC,HIST1H2AE,HIST1H2AN,PRPF19,FDPS,NSF,METTL14,MTG2,PPP2R1A,ZPR1,PRMT5,SEPSECS,PPP2CA,CLTC,VHL,DPH5,BCCIP,CHMP6,KAT8,DR1,TXN1,L3MBTL2,RIOK1,ELP3,TYMS,EIF2S3X,DDX49,EIF6,RTEL1,HNRNPU,TIMM17A,ATP1A1,SCAP,G6PDX,PRMT1,DDX5,CDC37,POU5F1,NR0B1,STK11,TELO2,DNAJC2,MAX,NELFB,MED26,TFRC,DPH6,MRE11A,MED20,PSMD14,UXT,NSUN3,DPH2,NCBP1,HDAC1,LRPPRC,SF3B4,DHX33,NEDD8,MED12,SMARCC1,TRIAP1,ATP6V0C…
regulation of DNA metabolic process	GO:0051052	1.48744e-22	21.8276	372	2742	126	21272	PRMT5,RTEL1,HNRNPU,DNAJC2,TFRC,MRE11A,CCT7,RFC2,PPP4C,CCT2,TCP1,RAD51,TEN1,ACTR2,ERCC4,PCNA,RFC5,MMS19,ERCC2,EXOSC10,PARP1,UBE2N,CHEK1,UPF1,WDR18,DKC1,RIF1,EXOSC3,PAM16,RFC4,CCT3,SMARCAD1,GFER,CCT4,PFN1,SMG1,THOC1,RNF8,DNMT1,RFC3,TRIM28,NAT10,FIGNL1,TINF2,DDX11,CCT5,MYC,TIMELESS,FH1,DHX36,CHTF18,AIFM1,CDT1,RPS3,PRDM14,GNL3L,CHTF8,CDK9,MPHOSPH8,SETD2,DSCC1,ATM,USP7,POLG2,PARN,PIK3CA,AURKB,HMGB1,MC…
tRNA aminoacylation	GO:0043039	1.72799e-22	21.7625	45	2742	37	21272	CARS2,NARS2,SARS2,DARS,HARS,IARS,PARS2,NARS,YARS,AARS2,QRSL1,TARS,MARS2,LARS,FARS2,QARS,RARS2,GATB,VARS2,AARS,KARS,VARS,GARS,FARSA,IARS2,DARS2,LARS2,WARS,MARS,WARS2,EPRS,RARS,TARS2,YARS2,CARS,SARS,FARSB
macromolecule catabolic process	GO:0009057	1.74209e-22	21.7589	1255	2742	293	21272	PNPT1,PRPF19,NSF,METTL14,ZPR1,UBA1,PPP2CA,FEN1,VHL,CHMP6,SKIV2L,DDX49,HNRNPU,DDX5,CLPP,COPS3,SKP1A,PSMD14,NCBP1,LRPPRC,NEDD8,SMARCC1,RNF40,VPS25,RBX1,APEX1,PSMB6,PCID2,PELO,PABPC1,MRTO4,NCBP2,SNF8,TARDBP,SPOP,ANAPC1,LSM2,RNASEH2A,ANAPC11,LSM7,EXOSC10,UBE2N,ARIH1,MDM4,UPF1,DKC1,PSMA1,PSMD2,DIS3,EXOSC3,PDCL3,PSMA6,BAP1,PSMA5,CNOT3,VPS11,CNOT10,RPL5,DDB1,RNASEH2B,FASTKD1,MAGOH,PAM16,DNA2,CUL3,KAT5,P…
positive regulation of macromolecule biosynthetic process	GO:0010557	3.19945e-22	21.4949	1857	2742	393	21272	ZPR1,VHL,KAT8,DR1,EIF2S3X,EIF6,HNRNPU,SCAP,PRMT1,POU5F1,DNAJC2,MAX,MED20,HDAC1,DHX33,MED12,SMARCC1,TRIAP1,CCT7,RFC2,CTCF,GTF2B,DDX3X,ZFP281,RUVBL2,ACTR3,IGBP1,MRPL12,TRUB2,NAA15,HDAC3,CCT2,DHX29,EAF1,KDM8,TCP1,NACA,APEX1,PCID2,SOX2,ELL,EIF3D,NUP85,MED10,ACTR2,NCOA3,PCNA,CDK7,RFC5,JMJD6,TOP2A,ILF2,DBF4,EEF2,SIN3A,MMS19,TADA1,ERCC2,HNRNPK,PARP1,UTP15,PIH1D1,CHEK1,MRPS27,XRCC6,DKC1,PRDM10,PWP1,SMARC…
posttranscriptional regulation of gene expression	GO:0010608	4.582e-22	21.3389	564	2742	165	21272	EEFSEC,METTL14,MTG2,SEPSECS,DPH5,TYMS,EIF2S3X,DDX49,EIF6,HNRNPU,DDX5,CDC37,POU5F1,DPH6,NSUN3,DPH2,NCBP1,LRPPRC,MTG1,CLP1,DPH3,DDX3X,TSFM,TRUB2,DHX29,APEX1,PCID2,EIF3K,MRPL44,EIF3D,NCBP2,EIF2B1,TARDBP,DHFR,EEF2,MRPS27,UPF1,RPL10,DKC1,EIF5,EIF3C,RPUSD4,CNOT3,AARS,CNOT10,RPL5,FASTKD1,MAGOH,RPS4X,EIF2B2,ILF3,ZC3H10,STAT3,NUDT21,TRIM71,PUS7,UQCC2,RPLP1,HNRNPL,SRP9,NAT10,GEMIN5,RPL30,MALSU1,EIF4G2,DHX3…
ribonucleoprotein complex localization	GO:0071166	6.81685e-22	21.1664	74	2742	48	21272	THOC3,EIF6,PABPN1,NCBP1,PCID2,NUP85,ABCE1,RAE1,NUP88,RAN,SRSF3,THOC6,RRS1,SDAD1,THOC1,SSB,LSG1,ENY2,NOL6,SARNP,NMD3,NUP93,NUP107,XPO1,SETD2,NUP214,NUP160,POLR2D,THOC5,GLE1,RPS15,THOC2,POLDIP3,TPR,NPM1,MCM3AP,NSUN2,NXF1,NUP155,TSC1,IWS1,EIF5A,NUP133,SUPT6,ALKBH5,PRPF31,LTV1,DDX39
amino acid activation	GO:0043038	7.73698e-22	21.1114	46	2742	37	21272	CARS2,NARS2,SARS2,DARS,HARS,IARS,PARS2,NARS,YARS,AARS2,QRSL1,TARS,MARS2,LARS,FARS2,QARS,RARS2,GATB,VARS2,AARS,KARS,VARS,GARS,FARSA,IARS2,DARS2,LARS2,WARS,MARS,WARS2,EPRS,RARS,TARS2,YARS2,CARS,SARS,FARSB
RNA biosynthetic process	GO:0032774	8.09075e-22	21.092	3485	2742	644	21272	HIST1H2AE,HIST1H2AN,ZPR1,PRMT5,SEPSECS,PPP2CA,VHL,GTF3C1,KAT8,DR1,TXN1,L3MBTL2,ELP3,HNRNPU,SARS2,SCAP,DDX5,POU5F1,NR0B1,POLRMT,DNAJC2,MAX,NELFB,TEFM,CRCP,MED26,TFRC,MED20,UXT,HDAC1,DHX33,NEDD8,MED12,SMARCC1,TRIAP1,FANCA,SMARCE1,POLR3B,CTCF,GTF2B,DDX3X,VPS72,ZFP281,RUVBL2,ACTR3,IGBP1,CIAO1,MRPL12,PFDN5,NAA15,HDAC3,TRAIP,EAF1,KDM8,NACA,APEX1,BIRC5,SETD5,PCID2,MED7,GTF2A1,SOX2,ELL,SAP130,POLR3F,QARS…
protein import	GO:0017038	9.62491e-22	21.0166	218	2742	89	21272	ZPR1,PPP2CA,IPO13,TIMM17A,TIMM50,IPO7,HSPA4,TOMM22,HDAC3,MBTPS1,TNPO3,NUP85,TARDBP,POLA2,NXT1,RBM22,DNAJC15,NUP88,RAN,TIMM44,PAM16,SNUPN,STAT3,HEATR3,TRIM28,ECT2,PHB2,GRPEL1,PEX12,CHCHD4,NUTF2,AIFM1,ROMO1,PEX10,IPO4,CDK1,NUP50,PIK3R2,KPNB1,EP300,KPNA2,NUP93,NUP107,NF1,DMAP1,HSPD1,TOMM7,NUP214,PEX3,NOLC1,PEX5,CSE1L,SAMM50,TOMM40,NUPL1,ING1,IPO5,BRCA1,HSP90AB1,TOMM70A,NUP153,TPR,HSPA8,TNPO1,NUP155,…
DNA packaging	GO:0006323	9.67224e-22	21.0145	210	2742	87	21272	BANF1,POU5F1,RBBP4,SMC2,GRWD1,HDAC1,SMARCC1,CTCF,MCM2,HIST2H3C1,HIST1H4H,HIST1H3F,TOP2A,SETDB1,SMARCA4,INCENP,FAM208A,RNF8,DNMT1,NCAPG2,TRIM28,HIST1H2BN,HIST1H4N,PAF1,CHAF1B,HIST1H2BP,HIST1H3G,NCAPH2,IPO4,SMC4,HIST1H4M,CDK1,HIST1H3D,HIST2H2AA2,DAXX,HIST2H3B,HIST1H4B,HIST1H3H,MPHOSPH8,HIST1H4A,ANP32B,HIST1H4F,HMGB1,SMARCA5,CHAF1A,HIST1H2BK,BRD2,HIST1H2BF,HIST1H3E,HIST1H2BH,NCAPD2,HAT1,CDAN1,PHF23,…
nuclear export	GO:0051168	1.30686e-21	20.8838	157	2742	73	21272	THOC3,TXN1,EIF6,PABPN1,NCBP1,HSPA9,PCID2,NUP85,NCBP2,ABCE1,NXT1,RBM22,RAE1,NUP88,RAN,PHAX,SRSF3,THOC6,RRS1,ALYREF,SDAD1,THOC1,SSB,NUPL2,LSG1,ENY2,CHCHD4,NUTF2,NOL6,SARNP,NMD3,RANGAP1,NUP93,NUP107,XPO1,SETD2,NUP214,NUP160,ANP32B,POLR2D,CSE1L,THOC5,HNRNPA1,GLE1,RPS15,THOC2,POLDIP3,NUP153,BARD1,TPR,NPM1,MCM3AP,NSUN2,PTPN11,NXF1,NUP155,MDM2,TSC1,RANBP3,IWS1,XPO4,NUP62,EIF5A,CCHCR1,NUP133,EIF4ENIF1,KH…
peptidyl-lysine modification	GO:0018205	1.4335e-21	20.8436	371	2742	124	21272	GLRX5,DOHH,WDR82,KAT8,DR1,L3MBTL2,HDAC1,CTCF,GTF2B,RUVBL2,SETD5,LIAS,NCOA3,JMJD6,SIN3A,TADA1,PIH1D1,CHEK1,POLE3,PWP1,UBA2,RIF1,SETDB1,YEATS4,SMARCA4,DHPS,CXXC1,KAT5,SENP6,GTF3C4,DNMT1,TRIM28,CTR9,MEAF6,BRD4,LIPT1,KMT2B,KANSL3,NDUFAB1,FH1,ZFP335,BRPF1,TRRAP,SUMO2,WDR5,RTF1,GNL3L,SAE1,EP300,MED24,ZMIZ2,ACTL6A,BLOC1S1,NELFA,MORF4L2,JARID2,EP400,SETD2,DMAP1,RUVBL1,LIPT2,MTF2,SMARCB1,OGT,MCRS1,NSMCE2,…
RNA phosphodiester bond hydrolysis	GO:0090501	1.51398e-21	20.8199	150	2742	71	21272	PNPT1,REXO2,CPSF3,FEN1,NCBP1,CPSF2,DBR1,APEX1,MRPL44,NCBP2,BOP1,POP4,RNASEH2A,EXOSC10,DIS3,FIP1L1,EXOSC3,POLR3K,TUT1,POLR2I,RRS1,RNASEH2B,NUDT21,EXOSC2,RPP38,RPP30,ABT1,RPP21,BMS1,EXOSC8,EXOSC7,RPP14,CNOT8,DROSHA,UTP23,NHP2,RRP36,RPS21,TOE1,PARN,CPSF4,POP5,YBEY,POP7,ELAC2,PDE12,POP1,CSTF2,TSEN2,DICER1,FCF1,NPM1,RNASEK,RCL1,DIS3L,SND1,USB1,RNASEH1,CNOT2,CNOT1,DCP2,TSEN34,TSR1,DGCR8,ZNRD1,NOB1,XRN1…
tRNA aminoacylation for protein translation	GO:0006418	1.52133e-21	20.8178	42	2742	35	21272	CARS2,NARS2,SARS2,DARS,HARS,IARS,PARS2,NARS,YARS,AARS2,TARS,MARS2,LARS,FARS2,QARS,RARS2,VARS2,AARS,KARS,VARS,GARS,FARSA,IARS2,DARS2,LARS2,WARS,MARS,WARS2,EPRS,RARS,TARS2,YARS2,CARS,SARS,FARSB
tRNA processing	GO:0008033	2.49326e-21	20.6032	116	2742	61	21272	HSD17B10,CTU1,ELP5,IKBKAP,ELP3,ELP6,RTCB,MOCS3,NSUN3,TRMT61A,AARS2,CLP1,DPH3,TRMU,GTPBP3,TRUB2,ADAT3,FARS2,POP4,ZBTB8OS,MTO1,TRMT112,ELP2,RPUSD4,AARS,POLR3K,TRIT1,URM1,TRMT5,MTFMT,SSB,PUS7,RPP38,NAT10,RPP30,PTCD1,RPP21,LSM6,RPP14,NSUN4,POP5,OSGEP,ELP4,POP7,ELAC2,THG1L,POP1,TSEN2,DDX1,TSEN54,TSEN15,TRMT10C,ALKBH1,CTU2,NSUN2,TRNT1,KTI12,TRMT6,TPRKB,TSEN34,ADAT2
ribonucleoprotein complex export from nucleus	GO:0071426	3.48427e-21	20.4579	73	2742	47	21272	THOC3,EIF6,PABPN1,NCBP1,PCID2,NUP85,ABCE1,RAE1,NUP88,RAN,SRSF3,THOC6,RRS1,SDAD1,THOC1,SSB,LSG1,ENY2,NOL6,SARNP,NMD3,NUP93,NUP107,XPO1,SETD2,NUP214,NUP160,POLR2D,THOC5,GLE1,RPS15,THOC2,POLDIP3,TPR,NPM1,MCM3AP,NSUN2,NXF1,NUP155,TSC1,IWS1,EIF5A,NUP133,SUPT6,ALKBH5,LTV1,DDX39
nucleic acid phosphodiester bond hydrolysis	GO:0090305	4.13679e-21	20.3833	255	2742	97	21272	PNPT1,REXO2,RAD9A,CPSF3,FEN1,MRE11A,NCBP1,CPSF2,DBR1,APEX1,MRPL44,PELO,NCBP2,ERCC4,BOP1,POP4,RNASEH2A,ERCC2,EXOSC10,DIS3,FIP1L1,EXOSC3,POLR3K,TUT1,POLR2I,RRS1,RNASEH2B,PAM16,DNA2,NUDT21,POLG,EXOSC2,RAD1,RPP38,POLE,RPP30,ABT1,RPP21,DCLRE1B,AIFM1,POLD1,ERCC3,BMS1,EXOSC8,EXOSC7,RPP14,CNOT8,DROSHA,UTP23,NHP2,RRP36,RPS21,TOE1,PARN,CPSF4,POP5,YBEY,FANCM,POP7,ELAC2,PDE12,POP1,CSTF2,RBBP8,TSEN2,DDX1,DICE…
nucleic acid-templated transcription	GO:0097659	6.87887e-21	20.1625	3472	2742	638	21272	HIST1H2AE,HIST1H2AN,ZPR1,PRMT5,PPP2CA,VHL,GTF3C1,KAT8,DR1,TXN1,L3MBTL2,ELP3,HNRNPU,SCAP,DDX5,POU5F1,NR0B1,POLRMT,DNAJC2,MAX,NELFB,TEFM,CRCP,MED26,TFRC,MED20,UXT,HDAC1,DHX33,NEDD8,MED12,SMARCC1,TRIAP1,FANCA,SMARCE1,POLR3B,CTCF,GTF2B,DDX3X,VPS72,ZFP281,RUVBL2,ACTR3,IGBP1,CIAO1,MRPL12,PFDN5,NAA15,HDAC3,TRAIP,EAF1,KDM8,NACA,APEX1,BIRC5,SETD5,PCID2,MED7,GTF2A1,SOX2,ELL,SAP130,POLR3F,QARS,NUP85,MED10,H…
maturation of SSU-rRNA	GO:0030490	7.16426e-21	20.1448	43	2742	35	21272	RIOK1,DCAF13,NOL10,ERCC2,RRS1,NOP14,WDR3,RPS16,NAT10,ABT1,LSM6,NGDN,BMS1,PWP2,DHX37,RPS8,UTP23,RPS21,SRFBP1,HEATR1,RPS19,RPS14,FCF1,RPS28,RCL1,BYSL,WDR46,DDX52,UTP6,GTF2H5,TBL3,TSR1,NOB1,HELQ,FAM207A
negative regulation of chromosome organization	GO:2001251	7.81247e-21	20.1072	146	2742	69	21272	L3MBTL2,RTEL1,HNRNPU,XRCC3,ZW10,MCM2,BIRC5,TEN1,PCID2,ERCC4,TOP2A,SIN3A,EXOSC10,PIH1D1,BUB3,MNAT1,DNMT1,NAT10,TINF2,FH1,CDT1,WDR5,GNL3L,PLK1,JARID2,ATM,MTF2,SMARCB1,PSMG2,SPDL1,AURKB,MCRS1,HNRNPA1,NBN,HNRNPC,OTUB1,BRCA1,NAA10,TERF1,KDM1A,TPR,TAF7,MAD2L1,MAD1L1,XRCC5,TRIP13,ZFP207,CEP192,PINX1,PHF8,MAD2L1BP,NDC80,CTC1,IK,BCOR,ATAD2,XRCC1,UBR5,TTK,DCP2,RAD21,SUPT6,ATRX,TERF2,FBXO5,APC,CCNB1,SLX4,ACD
regulation of chromosome segregation	GO:0051983	1.00706e-20	19.9969	105	2742	57	21272	FEN1,HNRNPU,XRCC3,SMC6,SMC5,RACGAP1,ZW10,BIRC5,PCID2,KIF2C,ANAPC1,ANAPC11,BUB3,CUL3,CDC16,ECT2,DDX11,CDC23,CDT1,NUMA1,PLK1,UBE2C,ATM,PSMG2,SPDL1,CDC27,AURKB,DYNC1H1,NSMCE2,BECN1,NAA10,ANAPC4,TPR,SPAG5,RMI2,MAD2L1,MAD1L1,NIPBL,TRIP13,ZFP207,CEP192,NEK2,MAD2L1BP,NDC80,IK,CDCA5,TTK,RAD21,ATRX,CENPE,FBXO5,CDC42,APC,CCNB1,MKI67,ANAPC5,CDC26
regulation of mRNA metabolic process	GO:1903311	1.15174e-20	19.9386	258	2742	97	21272	PNPT1,PRPF19,METTL14,HNRNPU,DDX5,NCBP1,SF3B4,RNF40,APEX1,PCID2,PABPC1,NCBP2,TARDBP,JMJD6,SRSF1,HNRNPK,UPF1,SRSF3,SFSWAP,FASTKD1,MAGOH,ZC3H10,CDC73,NUDT21,SRSF5,TRIM71,SRSF7,HNRNPL,CTR9,PTBP1,PAF1,U2AF2,SMU1,DHX36,TRA2B,SUPT5,PTCD2,CNOT8,CDK9,RNF20,METTL16,RBM25,SNRNP70,WTAP,ZC3H3,YBX1,RBM17,PDE12,POLR2G,NCL,HNRNPA1,HNRNPC,ZFP36L1,EIF4A3,FASTKD3,RBM39,SRSF10,NPM1,NELFE,HSPA8,RBM8A,FUS,GIGYF2,SAFB,…
positive regulation of cellular biosynthetic process	GO:0031328	1.43888e-20	19.842	1961	2742	404	21272	ZPR1,VHL,KAT8,DR1,EIF2S3X,EIF6,HNRNPU,SCAP,PRMT1,POU5F1,STK11,DNAJC2,MAX,MED20,HDAC1,DHX33,MED12,SMARCC1,TRIAP1,CCT7,RFC2,CTCF,GTF2B,DDX3X,ZFP281,RUVBL2,ACTR3,IGBP1,MRPL12,TRUB2,NAA15,HDAC3,CCT2,DHX29,EAF1,KDM8,TCP1,NACA,APEX1,PCID2,SOX2,ELL,EIF3D,NUP85,MED10,ACTR2,NCOA3,PCNA,CDK7,RFC5,JMJD6,TOP2A,ILF2,DBF4,EEF2,SIN3A,MMS19,TADA1,ERCC2,HNRNPK,PARP1,UTP15,PIH1D1,CHEK1,MRPS27,XRCC6,DKC1,PRDM10,PWP1…
mRNA transport	GO:0051028	1.88054e-20	19.7257	116	2742	60	21272	THOC3,PABPN1,NUP43,NCBP1,LRPPRC,PCID2,NUP85,NCBP2,SRSF1,NXT1,RAE1,NUP88,SRSF3,THOC6,ALYREF,MAGOH,THOC1,SRSF7,AHCTF1,ENY2,NUTF2,SARNP,NUP50,NUP93,NUP107,XPO1,SETD2,SEC13,NUP214,NUP160,POLR2D,ZC3H3,THOC5,NUPL1,HNRNPA1,GLE1,THOC2,POLDIP3,ZFP36L1,EIF4A3,TPR,MCM3AP,NSUN2,RBM8A,NXF1,NUP155,KHSRP,IWS1,NUP62,NUP37,EIF5A,SENP2,NUP133,SUPT6,ALKBH5,SEH1L,SLBP,NDC1,DDX39,NUP54
transcription, DNA-templated	GO:0006351	2.0577e-20	19.6866	3419	2742	628	21272	HIST1H2AE,HIST1H2AN,ZPR1,PRMT5,PPP2CA,VHL,GTF3C1,KAT8,DR1,TXN1,L3MBTL2,ELP3,HNRNPU,SCAP,DDX5,POU5F1,NR0B1,POLRMT,DNAJC2,MAX,NELFB,TEFM,CRCP,MED26,TFRC,MED20,UXT,HDAC1,DHX33,NEDD8,MED12,SMARCC1,TRIAP1,FANCA,SMARCE1,POLR3B,CTCF,GTF2B,DDX3X,VPS72,ZFP281,RUVBL2,ACTR3,IGBP1,CIAO1,MRPL12,PFDN5,NAA15,HDAC3,TRAIP,EAF1,KDM8,NACA,BIRC5,SETD5,PCID2,MED7,GTF2A1,SOX2,ELL,SAP130,POLR3F,QARS,NUP85,MED10,HIST2H3…
regulation of gene expression	GO:0010468	3.07601e-20	19.512	4734	2742	819	21272	PNPT1,EEFSEC,HIST1H2AE,HIST1H2AN,PRPF19,METTL14,MTG2,ZPR1,SEPSECS,PPP2CA,VHL,DPH5,KAT8,DR1,TXN1,SKIV2L,L3MBTL2,RIOK1,ELP3,TYMS,EIF2S3X,DDX49,EIF6,HNRNPU,TIMM17A,SCAP,DDX5,CDC37,POU5F1,NR0B1,DNAJC2,MAX,NELFB,MED26,TFRC,FAM98B,DPH6,MED20,UXT,NSUN3,DPH2,NCBP1,HDAC1,LRPPRC,SF3B4,DHX33,NEDD8,MED12,SMARCC1,TRIAP1,FANCA,SMARCE1,MTG1,CLP1,POLR3B,DPH3,RNF40,CTCF,GTF2B,DDX3X,VPS72,ZFP281,RUVBL2,ACTR3,IGBP1…
cellular localization	GO:0051641	5.62149e-20	19.2501	2736	2742	523	21272	PRPF19,NSF,ATP5A1,VPS29,ZPR1,PPP2CA,CLTC,VHL,IPO13,BCCIP,CHMP6,THOC3,PPIL2,NRBP1,TXN1,MIOS,CLUH,EIF6,HNRNPU,TIMM17A,TIMM10,TIMM50,PABPN1,LAMTOR4,STK11,LETM1,SKP1A,YKT6,IPO7,HSPA4,TFRC,TRAPPC5,NCBP1,NUBP1,SRP72,CENPA,CCT7,ISCU,CTCF,TOMM22,VPS25,DDX3X,RUVBL2,ACTR3,HSPA9,ZW10,ARF1,OPA1,HDAC3,CCT2,MFN2,TRAPPC1,TCP1,MBTPS1,ACTB,BIRC5,PCID2,TNPO3,NAPA,NUP85,ACTR2,NCBP2,MFN1,SNF8,TARDBP,KIF2C,POLA2,GOSR…
protein export from nucleus	GO:0006611	6.04298e-20	19.2187	132	2742	64	21272	THOC3,TXN1,EIF6,PABPN1,NCBP1,HSPA9,PCID2,NUP85,ABCE1,NXT1,RBM22,RAE1,NUP88,RAN,SRSF3,THOC6,RRS1,SDAD1,THOC1,SSB,NUPL2,LSG1,ENY2,CHCHD4,NUTF2,NOL6,SARNP,NMD3,RANGAP1,NUP93,NUP107,XPO1,SETD2,NUP214,NUP160,ANP32B,POLR2D,CSE1L,THOC5,GLE1,RPS15,THOC2,POLDIP3,BARD1,TPR,NPM1,MCM3AP,NSUN2,PTPN11,NXF1,NUP155,MDM2,TSC1,RANBP3,IWS1,XPO4,EIF5A,CCHCR1,NUP133,SUPT6,ALKBH5,XPO5,LTV1,DDX39
DNA biosynthetic process	GO:0071897	7.34284e-20	19.1341	185	2742	78	21272	HNRNPU,TELO2,DNAJC2,CCT7,RFC2,REV1,CCT2,POLD2,TCP1,LIG3,TEN1,POLA2,PCNA,RFC5,EXOSC10,CHEK1,DKC1,LIG4,PAM16,RFC4,CCT3,GFER,CCT4,POLG,LIG1,PHB,POLE,RFC3,NAT10,TINF2,CCT5,MYC,RPA1,CHTF18,POLD1,VCP,GNL3L,CHTF8,NHP2,POLDIP2,DSCC1,ATM,POLG2,PARN,SPRTN,AURKB,MCRS1,HNRNPA1,POLB,HNRNPC,PNKP,POLE2,GAR1,CCT8,POLQ,HSP90AB1,TFDP1,TERF1,NOP10,WRAP53,NPM1,POLD3,XRCC5,PINX1,NEK2,SMG7,REV3L,SMG5,NVL,NAF1,CTC1,MAP…
spliceosomal snRNP assembly	GO:0000387	8.62594e-20	19.0642	30	2742	28	21272	PRPF19,PRMT5,GEMIN6,AAR2,SNRPC,LSM2,PRPF6,SNRPE,SMN1,SNRPD2,GEMIN5,SNRPG,CLNS1A,PRPF8,PRPF3,GEMIN4,SNRPD1,DDX20,SNRPD3,SNRPF,GEMIN7,GEMIN8,SNRPB,GEMIN2,SART3,PRMT7,PRPF31,COIL
regulation of mitotic cell cycle phase transition	GO:1901990	9.29849e-20	19.0316	260	2742	96	21272	XRCC3,MRE11A,DDX3X,ZW10,APEX1,BIRC5,PCID2,LSM11,DBF4,ANAPC11,SIN3A,ERCC2,CHEK1,BUB3,RFWD3,DDB1,RNASEH2B,LSM10,CUL3,CDC16,CDC73,PHB2,ECD,BRD4,CUL4B,CDC23,HUS1,CDT1,ERCC3,CDK1,RPTOR,TOPBP1,PLK1,UBE2C,RAD51C,ATM,DONSON,ANP32B,PSMG2,SPDL1,CDC27,AURKB,ANKRD17,NSMCE2,RPL26,RPA2,NBN,CDK4,RAD17,BLM,BRCA1,INO80,TFDP1,ZFP36L1,CDC7,EZH2,ORC1,ANAPC4,TPR,MAD2L1,CDK2,MAD1L1,MTBP,TRIP13,PRKDC,GIGYF2,ZFP207,CEP1…
spindle organization	GO:0007051	9.93001e-20	19.0031	174	2742	75	21272	PPP2R1A,CLTC,BCCIP,SBDS,HNRNPU,HAUS4,RACGAP1,HDAC3,TUBB5,BIRC5,RCC1,RAE1,TUBG1,SMC3,INCENP,SENP6,DCTN6,TUBGCP5,HAUS7,MAPRE1,KIF11,KIF23,MYBL2,CENPW,HAUS3,NUMA1,VCP,RPS3,RANBP1,BORA,TPX2,KPNB1,PLK1,TUBGCP4,HAUS5,DCTN2,AURKA,CKAP5,TUBGCP2,AURKB,DYNC1H1,DRG1,CENPH,INO80,SMC1A,CDC20,TPR,SPAG5,WDR62,ESPL1,CENPJ,ZFP207,TUBGCP3,DCTN1,CEP192,NEK2,CHMP1A,NDC80,MZT1,KIF4,HAUS2,NUP62,HAUS8,ATRX,STAG2,CENPE,…
regulation of mRNA processing	GO:0050684	1.02225e-19	18.9904	155	2742	70	21272	PRPF19,HNRNPU,DDX5,NCBP1,SF3B4,RNF40,NCBP2,JMJD6,SRSF1,HNRNPK,SRSF3,SFSWAP,MAGOH,ZC3H10,CDC73,NUDT21,SRSF5,SRSF7,HNRNPL,CTR9,PTBP1,PAF1,U2AF2,SMU1,DHX36,TRA2B,SUPT5,PTCD2,CDK9,RNF20,METTL16,RBM25,SNRNP70,WTAP,ZC3H3,RBM17,NCL,HNRNPA1,ZFP36L1,EIF4A3,RBM39,SRSF10,NPM1,NELFE,HSPA8,RBM8A,SAFB,DYRK1A,RBFOX2,SRSF2,SART3,IWS1,IK,DAZAP1,RBM15,RBM19,THRAP3,CIRBP,KHDRBS1,SUPT6,SRPK1,RNPS1,CDK11B,BC005624,SR…
cell cycle checkpoint	GO:0000075	1.04134e-19	18.9824	178	2742	76	21272	PRPF19,RAD9A,XRCC3,MRE11A,ZW10,BIRC5,PCID2,INTS3,TOP2A,ATR,CHEK1,BUB3,RFWD3,TIPRL,RNASEH2B,DNA2,KNTC1,THOC1,RAD1,HINFP,CDC5L,WAC,TIMELESS,DCLRE1B,HUS1,CDT1,CDK1,RPL24,TIPIN,TOPBP1,PLK1,RPS6,ATM,DONSON,PSMG2,SPDL1,AURKB,ATRIP,RPL26,RPA2,THOC5,FANCD2,NBN,RAD17,BLM,BRCA1,INTS7,ORC1,TPR,BABAM1,ZWILCH,MAD2L1,NSUN2,MAD1L1,ZWINT,PTPN11,TRIP13,PRKDC,BCL2L1,GIGYF2,ZFP207,CEP192,MDM2,MAD2L1BP,NDC80,IK,PPP1…
nucleosome organization	GO:0034728	1.76879e-19	18.7523	145	2742	67	21272	RBBP4,GRWD1,SMARCC1,SMARCE1,CTCF,VPS72,MCM2,HIST2H3C1,HIST1H4H,HIST1H3F,SMARCA4,SRCAP,RNF8,HIST1H2BN,HIST1H4N,PAF1,CHAF1B,HIST1H2BP,HIST1H3G,IPO4,HIST1H4M,HIST1H3D,HIST2H2AA2,DAXX,HIST2H3B,HIST1H4B,HIST1H3H,SETD2,DMAP1,BPTF,PBRM1,HIST1H4A,ANP32B,SMARCB1,HIST1H4F,SMARCA5,CHAF1A,HIST1H2BK,BRD2,HIST1H2BF,HIST1H3E,HIST1H2BH,HAT1,HIST1H4J,INO80,OIP5,HIST1H4K,HIST1H3A,NPM1,MCM3AP,HIST1H3I,HIST1H2BM,HIS…
RNA modification	GO:0009451	2.03816e-19	18.6908	149	2742	68	21272	HSD17B10,METTL14,CTU1,ELP5,CMTR1,TFB1M,IKBKAP,ELP3,ELP6,MOCS3,NSUN3,TRMT61A,AARS2,DPH3,TRMU,GTPBP3,TRUB2,DIMT1,ADAT3,JMJD6,MTO1,EMG1,DKC1,TRMT112,ELP2,RPUSD4,AARS,TRIT1,URM1,TRMT5,FTSJ3,MTFMT,GM10767,PUS7,NAT10,TFB2M,NSUN4,NHP2,METTL16,OSGEP,ELP4,WTAP,THG1L,HNRNPC,GAR1,TRMT10C,ALKBH1,CMTR2,NOP10,CTU2,NSUN2,FAM103A1,RNMT,ZC3H13,KTI12,FBL,TRMT6,NSUN5,TPRKB,NAF1,RBM15,TGS1,ADAT2,METTL15,ALKBH5,FTO,M…
telomere maintenance via telomere lengthening	GO:0010833	2.19155e-19	18.6592	81	2742	48	21272	RTEL1,HNRNPU,TELO2,CCT7,CCT2,TCP1,RAD51,TEN1,ERCC4,EXOSC10,DKC1,CCT3,CCT4,NAT10,TINF2,CCT5,RPA1,DCLRE1B,DHX36,GNL3L,NHP2,ATM,PARN,AURKB,MCRS1,HNRNPA1,HNRNPC,PNKP,GAR1,CCT8,HSP90AB1,TERF1,NOP10,WRAP53,ZSCAN4C,XRCC5,PINX1,NEK2,SMG7,SMG5,NAF1,CTC1,MAPK1,ZSCAN4F,DCP2,TERF2,SLX4,ACD
positive regulation of biosynthetic process	GO:0009891	3.04194e-19	18.5168	2004	2742	406	21272	FDPS,ZPR1,VHL,KAT8,DR1,EIF2S3X,EIF6,HNRNPU,SCAP,PRMT1,POU5F1,STK11,DNAJC2,MAX,MED20,HDAC1,DHX33,MED12,SMARCC1,TRIAP1,CCT7,RFC2,CTCF,GTF2B,DDX3X,ZFP281,RUVBL2,ACTR3,IGBP1,MRPL12,TRUB2,NAA15,HDAC3,CCT2,DHX29,EAF1,KDM8,TCP1,NACA,APEX1,PCID2,SOX2,ELL,EIF3D,NUP85,MED10,ACTR2,NCOA3,PCNA,CDK7,RFC5,JMJD6,TOP2A,ILF2,DBF4,EEF2,SIN3A,MMS19,TADA1,ERCC2,HNRNPK,PARP1,UTP15,PIH1D1,CHEK1,MRPS27,XRCC6,DKC1,PRDM10…
positive regulation of nitrogen compound metabolic process	GO:0051173	4.04803e-19	18.3928	3163	2742	584	21272	OXSR1,PNPT1,PRPF19,NSF,METTL14,ZPR1,PPP2CA,VHL,KAT8,DR1,TXN1,L3MBTL2,RIOK1,EIF2S3X,EIF6,RTEL1,HNRNPU,TIMM17A,SCAP,PRMT1,DDX5,POU5F1,STK11,TELO2,DNAJC2,MAX,TFRC,MRE11A,MED20,PSMD14,NCBP1,HDAC1,SF3B4,DHX33,MED12,SMARCC1,TRIAP1,ATP6V0C,CCT7,RFC2,RNF40,CTCF,GTF2B,DDX3X,ZFP281,RUVBL2,PPP2R3C,ACTR3,IGBP1,MRPL12,TRUB2,IL6ST,RBX1,NAA15,HDAC3,CCT2,DHX29,EAF1,DIMT1,KDM8,TCP1,RAD51,NACA,APEX1,PCID2,SOX2,ELL…
regulation of mitotic sister chromatid segregation	GO:0033047	4.43804e-19	18.3528	70	2742	44	21272	HNRNPU,XRCC3,SMC5,ZW10,BIRC5,PCID2,ANAPC1,ANAPC11,BUB3,CUL3,CDC16,CDC23,CDT1,NUMA1,PLK1,UBE2C,ATM,PSMG2,SPDL1,CDC27,AURKB,NSMCE2,BECN1,NAA10,ANAPC4,TPR,MAD2L1,MAD1L1,NIPBL,TRIP13,ZFP207,CEP192,MAD2L1BP,NDC80,IK,TTK,RAD21,ATRX,CENPE,FBXO5,APC,CCNB1,ANAPC5,CDC26
regulation of sister chromatid segregation	GO:0033045	4.6287e-19	18.3345	82	2742	48	21272	FEN1,HNRNPU,XRCC3,SMC5,ZW10,BIRC5,PCID2,ANAPC1,ANAPC11,BUB3,CUL3,CDC16,DDX11,CDC23,CDT1,NUMA1,PLK1,UBE2C,ATM,PSMG2,SPDL1,CDC27,AURKB,NSMCE2,BECN1,NAA10,ANAPC4,TPR,RMI2,MAD2L1,MAD1L1,NIPBL,TRIP13,ZFP207,CEP192,MAD2L1BP,NDC80,IK,CDCA5,TTK,RAD21,ATRX,CENPE,FBXO5,APC,CCNB1,ANAPC5,CDC26
regulation of organelle organization	GO:0033043	6.07884e-19	18.2162	1277	2742	286	21272	CLTC,FEN1,L3MBTL2,RTEL1,HNRNPU,XRCC3,SMC5,CDC37,POU5F1,MRE11A,NUBP1,VDAC1,TRIAP1,CCT7,RNF40,CTCF,RUVBL2,ACTR3,ZW10,ARF1,OPA1,MCM2,CCT2,MFN2,SSBP1,TCP1,BIRC5,TEN1,SETD5,PCID2,RCC1,ACTR2,MFN1,TBCD,ERCC4,ARPC4,ARPC2,TOP2A,ANAPC1,ANAPC11,SIN3A,EXOSC10,UBE2N,PIH1D1,RICTOR,CHEK1,RAE1,BUB3,UPF1,DKC1,TUBG1,SMC3,RIF1,SETDB1,DNM1L,LIG4,FXN,VPS11,WDR1,PAM16,CCT3,CUL3,FAM208A,SENP6,CCT4,HUWE1,PFN1,CDC16,SMG1…
DNA-templated transcription, elongation	GO:0006354	9.44809e-19	18.0247	68	2742	43	21272	HNRNPU,TEFM,SETD5,PCID2,ELL,ERCC2,ELP2,POLR2I,GTF2F1,NELFCD,THOC1,CDC73,RNF8,CTR9,PAF1,BRD4,ENY2,SUPT5,RTF1,ERCC3,WDR43,NELFA,CDK9,SETD2,ELOF1,PBRM1,EAPP,THOC5,KAT7,CD3EAP,WDR61,EZH2,NELFE,SUPT4A,ADRM1,GTF2H5,GTF2F2,SUPT6,CCNT2,KIF22,POLR1E,RNF168,CCNT1
regulation of RNA metabolic process	GO:0051252	1.23063e-18	17.9099	3629	2742	651	21272	PNPT1,HIST1H2AE,HIST1H2AN,PRPF19,METTL14,ZPR1,PPP2CA,VHL,KAT8,DR1,TXN1,L3MBTL2,RIOK1,ELP3,DDX49,HNRNPU,SCAP,DDX5,POU5F1,NR0B1,DNAJC2,MAX,NELFB,MED26,TFRC,MED20,UXT,NCBP1,HDAC1,LRPPRC,SF3B4,DHX33,NEDD8,MED12,SMARCC1,TRIAP1,FANCA,SMARCE1,RNF40,CTCF,GTF2B,DDX3X,VPS72,ZFP281,RUVBL2,ACTR3,IGBP1,CIAO1,MRPL12,PFDN5,NAA15,HDAC3,TRAIP,EAF1,DIMT1,KDM8,NACA,APEX1,BIRC5,SETD5,PCID2,MED7,SOX2,ELL,SAP130,QARS,…
positive regulation of cellular metabolic process	GO:0031325	1.56645e-18	17.8051	3355	2742	610	21272	OXSR1,PNPT1,PRPF19,NSF,METTL14,ZPR1,PPP2CA,VHL,KAT8,DR1,TXN1,L3MBTL2,RIOK1,EIF2S3X,EIF6,RTEL1,HNRNPU,TIMM17A,SCAP,PRMT1,DDX5,CDC37,POU5F1,STK11,TELO2,DNAJC2,MAX,TFRC,MRE11A,MED20,PSMD14,NCBP1,HDAC1,SF3B4,DHX33,MED12,SMARCC1,TRIAP1,ATP6V0C,CCT7,RFC2,ISCU,RNF40,CTCF,GTF2B,DDX3X,ZFP281,RUVBL2,PPP2R3C,ACTR3,IGBP1,MRPL12,TRUB2,IL6ST,RBX1,NAA15,HDAC3,CCT2,MFN2,DHX29,EAF1,DIMT1,KDM8,TCP1,RAD51,NACA,APEX…
regulation of cell cycle phase transition	GO:1901987	8.44884e-18	17.0732	297	2742	101	21272	XRCC3,MRE11A,DDX3X,ZW10,APEX1,BIRC5,PCID2,LSM11,DBF4,ANAPC11,SIN3A,ERCC2,CHEK1,BUB3,RFWD3,DDB1,RNASEH2B,LSM10,CUL3,CDC16,CDC73,PHB2,PAF1,ECD,BRD4,CUL4B,CDC23,HUS1,CDT1,ERCC3,CDK1,RPTOR,TOPBP1,PLK1,UBE2C,RAD51C,ATM,DONSON,ANP32B,PSMG2,SPDL1,CDC27,AURKB,ANKRD17,NSMCE2,RPL26,RPA2,NBN,CDK4,RAD17,BLM,BRCA1,INO80,TFDP1,ZFP36L1,CDC7,EZH2,ORC1,ANAPC4,TPR,BABAM1,NPM1,MAD2L1,CDK2,MAD1L1,MTBP,TRIP13,PRKDC,G…
chromosome separation	GO:0051304	1.30548e-17	16.8842	90	2742	49	21272	PPP2R1A,XRCC3,ZW10,BIRC5,PCID2,ERCC4,TOP2A,ANAPC1,ANAPC11,BUB3,CUL3,SMARCAD1,CDC16,CDC23,NCAPH2,CDT1,NUMA1,PLK1,UBE2C,ATM,FANCM,PSMG2,SPDL1,CDC27,AURKB,NSMCE2,ANAPC4,TPR,MAD2L1,MAD1L1,ESPL1,TRIP13,ZFP207,TOP3A,CEP192,MAD2L1BP,NDC80,NCAPD3,IK,TTK,RAD21,CENPE,NCAPH,FBXO5,APC,CCNB1,ANAPC5,SLX4,CDC26
regulation of DNA replication	GO:0006275	1.47712e-17	16.8306	107	2742	54	21272	RFC2,ORC5,LIG3,PCNA,RFC5,DBF4,ATR,WDR18,SMC3,ORC3,STOML2,RFC4,DNA2,RFC3,GTPBP4,TIMELESS,USP37,RBBP6,CHTF18,HUS1,CDT1,CDK1,TIPIN,CHTF8,DSCC1,POLG2,TTF1,CCNA2,DONSON,ESCO2,ANKRD17,CDAN1,KAT7,RAD17,BLM,INO80,CDC7,TERF1,NPM1,CDK2,EHMT2,CTC1,PDS5A,RAC1,SENP2,BRCA2,GMNN,ATRX,ZFP830,FBXO5,CDC42,GLI2,KCTD13,ATAD5
chromatin assembly or disassembly	GO:0006333	2.79319e-17	16.5539	184	2742	74	21272	POU5F1,RBBP4,GRWD1,HDAC1,SMARCC1,SMARCE1,CTCF,MCM2,HIST2H3C1,HIST1H4H,HIST1H3F,SETDB1,SMARCA4,FAM208A,DNMT1,TRIM28,HIST1H2BN,HIST1H4N,PAF1,CHAF1B,HIST1H2BP,HIST1H3G,IPO4,HIST1H4M,HIST1H3D,HIST2H2AA2,DAXX,HIST2H3B,HIST1H4B,HIST1H3H,MPHOSPH8,PBRM1,HIST1H4A,ANP32B,SMARCB1,HIST1H4F,HMGB1,SMARCA5,CHAF1A,HIST1H2BK,BRD2,HIST1H2BF,HIST1H3E,HIST1H2BH,HAT1,CDAN1,HIST1H4J,OIP5,HIST1H4K,HIST1H3A,TPR,HELLS,NA…
NADH dehydrogenase complex assembly	GO:0010257	2.81711e-17	16.5502	47	2742	34	21272	NDUFAF7,NUBPL,NDUFA8,NDUFA3,NDUFA2,NDUFAF6,TMEM126B,ACAD9,NDUFC1,NDUFB9,NDUFS7,NDUFA1,NDUFA6,NDUFS8,NDUFA11,NDUFB8,NDUFAF4,NDUFAB1,NDUFA13,AIFM1,NDUFB7,NDUFB10,NDUFB6,FOXRED1,NDUFAF5,NDUFA5,NDUFA10,NDUFB4,NDUFB5,NDUFB11,OXA1L,NDUFB2,NDUFB3,NDUFC2
mitochondrial respiratory chain complex I assembly	GO:0032981	2.81711e-17	16.5502	47	2742	34	21272	NDUFAF7,NUBPL,NDUFA8,NDUFA3,NDUFA2,NDUFAF6,TMEM126B,ACAD9,NDUFC1,NDUFB9,NDUFS7,NDUFA1,NDUFA6,NDUFS8,NDUFA11,NDUFB8,NDUFAF4,NDUFAB1,NDUFA13,AIFM1,NDUFB7,NDUFB10,NDUFB6,FOXRED1,NDUFAF5,NDUFA5,NDUFA10,NDUFB4,NDUFB5,NDUFB11,OXA1L,NDUFB2,NDUFB3,NDUFC2
positive regulation of macromolecule metabolic process	GO:0010604	3.02596e-17	16.5191	3504	2742	626	21272	OXSR1,PNPT1,PRPF19,NSF,METTL14,ZPR1,PPP2CA,VHL,KAT8,DR1,TXN1,L3MBTL2,RIOK1,EIF2S3X,EIF6,RTEL1,HNRNPU,TIMM17A,SCAP,PRMT1,DDX5,POU5F1,STK11,TELO2,DNAJC2,MAX,MED26,TFRC,FAM98B,MRE11A,MED20,PSMD14,NCBP1,HDAC1,SF3B4,DHX33,MED12,SMARCC1,TRIAP1,ATP6V0C,CCT7,RFC2,POLR3B,RNF40,CTCF,GTF2B,DDX3X,ZFP281,RUVBL2,PPP2R3C,ACTR3,IGBP1,MRPL12,TRUB2,IL6ST,RBX1,NAA15,HDAC3,CCT2,DHX29,EAF1,DIMT1,KDM8,TCP1,RAD51,NACA,…
regulation of telomere maintenance	GO:0032204	3.94793e-17	16.4036	82	2742	46	21272	RTEL1,HNRNPU,MRE11A,CCT7,CCT2,TCP1,TEN1,ERCC4,EXOSC10,UPF1,DKC1,CCT3,CCT4,SMG1,NAT10,TINF2,CCT5,MYC,DHX36,GNL3L,ATM,PARN,AURKB,MCRS1,GNL3,HNRNPA1,NBN,HNRNPC,PNKP,CCT8,TERF1,XRCC5,PINX1,NEK2,SMG7,SMG5,NAF1,CTC1,MAPK1,PPP1R10,XRCC1,DCP2,ATRX,TERF2,SLX4,ACD
mitotic sister chromatid separation	GO:0051306	4.50493e-17	16.3463	61	2742	39	21272	PPP2R1A,XRCC3,ZW10,BIRC5,PCID2,ANAPC1,ANAPC11,BUB3,CUL3,CDC16,CDC23,NCAPH2,CDT1,PLK1,UBE2C,ATM,PSMG2,SPDL1,CDC27,AURKB,NSMCE2,ANAPC4,TPR,MAD2L1,MAD1L1,TRIP13,ZFP207,CEP192,MAD2L1BP,NDC80,IK,TTK,RAD21,CENPE,FBXO5,APC,CCNB1,ANAPC5,CDC26
macromolecule methylation	GO:0043414	9.03448e-17	16.0441	301	2742	100	21272	HSD17B10,METTL14,NDUFAF7,WDR82,PRMT5,CMTR1,TFB1M,L3MBTL2,PRMT1,FAM98B,NSUN3,TRMT61A,CTCF,GTPBP3,DIMT1,SETD5,PARP1,PIH1D1,EMG1,PWP1,RIF1,SETDB1,TRMT112,SMARCA4,CXXC1,ILF3,TRMT5,FTSJ3,GM10767,DNMT1,TRIM28,CTR9,PAF1,BRD4,KMT2B,MYC,FH1,ZFP335,WDR5,RTF1,PRDM14,ETF1,TFB2M,NSUN4,NELFA,PPM1D,JARID2,MPHOSPH8,SETD2,RNF20,METTL16,N6AMT1,SNRPD3,PIK3CA,MTF2,WTAP,SMARCB1,OGT,BRCA1,TRMT10C,KDM1A,WDR61,CMTR2,EZH…
establishment of localization in cell	GO:0051649	1.11066e-16	15.9544	2035	2742	401	21272	NSF,ATP5A1,VPS29,ZPR1,PPP2CA,CLTC,IPO13,BCCIP,CHMP6,THOC3,NRBP1,TXN1,EIF6,HNRNPU,TIMM17A,TIMM10,TIMM50,PABPN1,LETM1,YKT6,IPO7,HSPA4,TRAPPC5,NCBP1,SRP72,CENPA,ISCU,TOMM22,VPS25,ACTR3,HSPA9,ZW10,ARF1,HDAC3,MFN2,TRAPPC1,MBTPS1,ACTB,BIRC5,PCID2,TNPO3,NAPA,NUP85,ACTR2,NCBP2,SNF8,TARDBP,KIF2C,POLA2,GOSR2,ARPC2,ABCE1,NXT1,RBM22,DNAJC15,RAE1,NUP88,RAN,SEC61A1,DNM1L,ARFRP1,SRP19,PHAX,PMPCB,VPS11,SRSF3,INC…
mRNA catabolic process	GO:0006402	1.38426e-16	15.8588	205	2742	78	21272	PNPT1,METTL14,SKIV2L,HNRNPU,DDX5,NCBP1,APEX1,PCID2,PELO,PABPC1,MRTO4,NCBP2,TARDBP,LSM2,LSM7,EXOSC10,UPF1,EXOSC3,CNOT3,CNOT10,FASTKD1,MAGOH,SMG1,TRIM71,SSB,EXOSC2,SUPV3L1,DHX36,LSM6,MTPAP,EXOSC5,ETF1,EXOSC8,EXOSC7,CNOT8,METTL16,EIF3E,PRPF18,ATM,PARN,POLR2D,YBX1,PDE12,POLR2G,LSM5,HNRNPC,ZFP36L1,EXOSC4,EIF4A3,FASTKD3,NPM1,DCPS,RBM8A,FUS,GIGYF2,GSPT1,DAZL,SMG7,KHSRP,SMG5,ELAVL1,CNOT2,LSM3,CNOT1,LSM4,…
metaphase/anaphase transition of mitotic cell cycle	GO:0007091	1.98289e-16	15.7027	57	2742	37	21272	XRCC3,ZW10,BIRC5,PCID2,ANAPC1,ANAPC11,BUB3,CUL3,CDC16,CDC23,CDT1,PLK1,UBE2C,ATM,PSMG2,SPDL1,CDC27,AURKB,NSMCE2,ANAPC4,TPR,MAD2L1,MAD1L1,TRIP13,ZFP207,CEP192,MAD2L1BP,NDC80,IK,TTK,RAD21,CENPE,FBXO5,APC,CCNB1,ANAPC5,CDC26
chromatin assembly	GO:0031497	2.07427e-16	15.6831	161	2742	67	21272	POU5F1,RBBP4,GRWD1,HDAC1,CTCF,MCM2,HIST2H3C1,HIST1H4H,HIST1H3F,SETDB1,SMARCA4,FAM208A,DNMT1,TRIM28,HIST1H2BN,HIST1H4N,PAF1,CHAF1B,HIST1H2BP,HIST1H3G,IPO4,HIST1H4M,HIST1H3D,HIST2H2AA2,DAXX,HIST2H3B,HIST1H4B,HIST1H3H,MPHOSPH8,HIST1H4A,ANP32B,HIST1H4F,HMGB1,SMARCA5,CHAF1A,HIST1H2BK,BRD2,HIST1H2BF,HIST1H3E,HIST1H2BH,HAT1,CDAN1,HIST1H4J,OIP5,HIST1H4K,HIST1H3A,TPR,HELLS,NAA40,NPM1,HIST1H3I,HIST1H2BM,HI…
positive regulation of cell cycle	GO:0045787	2.57779e-16	15.5888	357	2742	111	21272	FEN1,HNRNPU,XRCC3,SMC5,RACGAP1,DDX3X,APEX1,BIRC5,PCID2,LSM11,DBF4,ANAPC11,SIN3A,CHEK1,MDM4,LSM10,CUL3,NANOG,CDC16,THOC1,CDC73,MNAT1,KIF20B,MYBBP1A,ECT2,PHB2,DDX11,PAF1,BRD4,CUL4B,KIF23,MYC,CDT1,CDK1,NUMA1,RANBP1,RPTOR,CHMP3,CDK9,UBE2C,POLDIP2,FNTA,RAD51C,ANP32B,CDC27,AURKB,RPS15A,DYNC1H1,ANKRD17,HMGB1,NSMCE2,RPL26,THOC5,CDK4,BECN1,BRCA1,INO80,HSP90AB1,TFDP1,FNTB,CDC7,EZH2,ORC1,ANAPC4,TPR,EIF4E,NP…
maturation of SSU-rRNA from tricistronic rRNA transcript (SSU-rRNA, 5.8S rRNA, LSU-rRNA)	GO:0000462	2.72981e-16	15.5639	28	2742	25	21272	DCAF13,NOL10,ERCC2,RRS1,RPS16,ABT1,NGDN,BMS1,PWP2,DHX37,RPS8,UTP23,RPS21,HEATR1,RPS19,RPS14,FCF1,RCL1,BYSL,WDR46,UTP6,GTF2H5,TBL3,TSR1,FAM207A
negative regulation of nucleobase-containing compound metabolic process	GO:0045934	3.13949e-16	15.5031	1550	2742	322	21272	HIST1H2AE,HIST1H2AN,PPP2CA,VHL,KAT8,DR1,TXN1,RTEL1,HNRNPU,DDX5,POU5F1,NR0B1,DNAJC2,MAX,NELFB,UXT,HDAC1,LRPPRC,SMARCE1,RNF40,CTCF,ZFP281,RUVBL2,IGBP1,PFDN5,HDAC3,KDM8,NACA,BIRC5,TEN1,SAP130,QARS,PABPC1,HIST2H3C1,ERCC4,TARDBP,HIST1H3F,PCNA,THAP11,SPOP,ABCE1,SIN3A,HNRNPK,EXOSC10,PARP1,DDX54,CHEK1,MDM4,XRCC6,RPL10,DKC1,DNAJA3,RIF1,SETDB1,SMARCA4,BAP1,NACC1,SFSWAP,PAM16,CUL3,NELFCD,KAT5,FAM208A,PSMC5,…
mitotic cell cycle checkpoint	GO:0007093	4.37176e-16	15.3593	128	2742	58	21272	RAD9A,XRCC3,MRE11A,ZW10,BIRC5,PCID2,INTS3,TOP2A,CHEK1,BUB3,RFWD3,KNTC1,DCLRE1B,HUS1,CDT1,CDK1,RPL24,TIPIN,TOPBP1,PLK1,RPS6,ATM,DONSON,PSMG2,SPDL1,AURKB,RPL26,RPA2,FANCD2,NBN,RAD17,BLM,BRCA1,ORC1,TPR,ZWILCH,MAD2L1,MAD1L1,ZWINT,TRIP13,PRKDC,BCL2L1,GIGYF2,ZFP207,CEP192,MDM2,MAD2L1BP,NDC80,IK,PPP1R10,MSH2,TTK,WEE1,ZFP830,CCNG1,APC,CCNB1,NAE1
methylation	GO:0032259	4.60061e-16	15.3372	345	2742	108	21272	HSD17B10,METTL14,NDUFAF7,WDR82,PRMT5,DPH5,CMTR1,TFB1M,L3MBTL2,TYMS,PRMT1,METTL17,FAM98B,NSUN3,TRMT61A,CTCF,GTPBP3,DIMT1,SETD5,COQ5,PARP1,PIH1D1,EMG1,PRDM10,PWP1,RIF1,SETDB1,TRMT112,SMARCA4,CXXC1,ILF3,TRMT5,FTSJ3,GM10767,DNMT1,TRIM28,CTR9,PAF1,BRD4,KMT2B,MYC,FH1,ZFP335,WDR5,RTF1,PRDM14,ETF1,TFB2M,NSUN4,NELFA,PPM1D,JARID2,MPHOSPH8,SETD2,RNF20,METTL16,NDUFAF5,N6AMT1,SNRPD3,PIK3CA,MTF2,WTAP,SMARCB1,O…
regulation of mitotic sister chromatid separation	GO:0010965	4.7981e-16	15.3189	58	2742	37	21272	XRCC3,ZW10,BIRC5,PCID2,ANAPC1,ANAPC11,BUB3,CUL3,CDC16,CDC23,CDT1,PLK1,UBE2C,ATM,PSMG2,SPDL1,CDC27,AURKB,NSMCE2,ANAPC4,TPR,MAD2L1,MAD1L1,TRIP13,ZFP207,CEP192,MAD2L1BP,NDC80,IK,TTK,RAD21,CENPE,FBXO5,APC,CCNB1,ANAPC5,CDC26
nucleobase-containing compound catabolic process	GO:0034655	5.04673e-16	15.297	355	2742	110	21272	PNPT1,METTL14,ZPR1,FEN1,SKIV2L,DDX49,HNRNPU,DUT,DDX5,NCBP1,ITPA,LRPPRC,APEX1,PCID2,PELO,PABPC1,MRTO4,NCBP2,TARDBP,LSM2,RNASEH2A,LSM7,EXOSC10,UPF1,DKC1,DIS3,EXOSC3,CNOT3,CNOT10,RNASEH2B,FASTKD1,MAGOH,PAM16,DNA2,SMG1,TRIM71,SSB,EXOSC2,AHCY,SUPV3L1,RNASEH2C,DHX36,AIFM1,LSM6,MTPAP,EXOSC5,VCP,ETF1,EXOSC8,SKIV2L2,EXOSC7,MGAT1,CNOT8,DROSHA,METTL16,EIF3E,PRPF18,ATM,PARN,POLR2D,YBX1,PDE12,POLR2G,POP1,LSM5…
positive regulation of metabolic process	GO:0009893	5.26605e-16	15.2785	3799	2742	663	21272	OXSR1,PNPT1,PRPF19,FDPS,NSF,METTL14,ZPR1,PPP2CA,VHL,KAT8,DR1,TXN1,L3MBTL2,RIOK1,EIF2S3X,EIF6,RTEL1,HNRNPU,TIMM17A,SCAP,PRMT1,DDX5,CDC37,POU5F1,STK11,TELO2,DNAJC2,MAX,MED26,TFRC,FAM98B,MRE11A,MED20,PSMD14,NCBP1,HDAC1,SF3B4,DHX33,MED12,SMARCC1,TRIAP1,ATP6V0C,CCT7,RFC2,POLR3B,ISCU,RNF40,CTCF,GTF2B,DDX3X,ZFP281,RUVBL2,PPP2R3C,ACTR3,IGBP1,MRPL12,TRUB2,IL6ST,RBX1,NAA15,HDAC3,CCT2,MFN2,DHX29,EAF1,DIMT1,…
microtubule cytoskeleton organization involved in mitosis	GO:1902850	5.36836e-16	15.2702	136	2742	60	21272	CLTC,BCCIP,SBDS,HNRNPU,RACGAP1,CENPA,ZW10,BIRC5,RCC1,RAE1,TUBG1,SMC3,DCTN6,KIF11,KIF23,MYBL2,NUMA1,VCP,BORA,TPX2,KPNB1,PLK1,SETD2,DCTN2,DYNLT1F,AURKA,SPDL1,AURKB,DYNC1H1,DRG1,DYNLT1B,CENPH,MCPH1,SMC1A,CDC20,TPR,WDR62,MAD2L1,ZFP207,DCTN1,CEP192,DYNLT1A,NEK2,ITGB1,CHMP1A,NDC80,MZT1,KIF4,NUP62,ACTR10,STAG2,CENPE,ACTR1A,ACTR1B,PAFAH1B1,POC1A,TACC3,CCNB1,STIL,PCNT
regulation of mitotic metaphase/anaphase transition	GO:0030071	1.01144e-15	14.9951	56	2742	36	21272	XRCC3,ZW10,BIRC5,PCID2,ANAPC11,BUB3,CUL3,CDC16,CDC23,CDT1,PLK1,UBE2C,ATM,PSMG2,SPDL1,CDC27,AURKB,NSMCE2,ANAPC4,TPR,MAD2L1,MAD1L1,TRIP13,ZFP207,CEP192,MAD2L1BP,NDC80,IK,TTK,RAD21,CENPE,FBXO5,APC,CCNB1,ANAPC5,CDC26
metaphase/anaphase transition of cell cycle	GO:0044784	1.12736e-15	14.9479	59	2742	37	21272	XRCC3,ZW10,BIRC5,PCID2,ANAPC1,ANAPC11,BUB3,CUL3,CDC16,CDC23,CDT1,PLK1,UBE2C,ATM,PSMG2,SPDL1,CDC27,AURKB,NSMCE2,ANAPC4,TPR,MAD2L1,MAD1L1,TRIP13,ZFP207,CEP192,MAD2L1BP,NDC80,IK,TTK,RAD21,CENPE,FBXO5,APC,CCNB1,ANAPC5,CDC26
positive regulation of RNA metabolic process	GO:0051254	1.14745e-15	14.9403	1681	2742	341	21272	PNPT1,PRPF19,METTL14,ZPR1,VHL,KAT8,DR1,RIOK1,HNRNPU,SCAP,DDX5,POU5F1,DNAJC2,MAX,MED20,NCBP1,HDAC1,SF3B4,DHX33,MED12,SMARCC1,TRIAP1,CTCF,GTF2B,DDX3X,ZFP281,RUVBL2,ACTR3,IGBP1,MRPL12,NAA15,HDAC3,EAF1,DIMT1,KDM8,NACA,APEX1,PCID2,SOX2,ELL,PABPC1,NUP85,MED10,ACTR2,NCBP2,TARDBP,NCOA3,CDK7,JMJD6,TOP2A,SRSF1,ILF2,SIN3A,MMS19,TADA1,ERCC2,RBM22,HNRNPK,PARP1,UTP15,PIH1D1,CHEK1,UPF1,XRCC6,PRDM10,PWP1,POLR2A,…
regulation of chromosome separation	GO:1905818	2.62896e-15	14.5802	63	2742	38	21272	XRCC3,ZW10,BIRC5,PCID2,ANAPC1,ANAPC11,BUB3,CUL3,CDC16,CDC23,CDT1,NUMA1,PLK1,UBE2C,ATM,PSMG2,SPDL1,CDC27,AURKB,NSMCE2,ANAPC4,TPR,MAD2L1,MAD1L1,TRIP13,ZFP207,CEP192,MAD2L1BP,NDC80,IK,TTK,RAD21,CENPE,FBXO5,APC,CCNB1,ANAPC5,CDC26
regulation of mitotic nuclear division	GO:0007088	4.83495e-15	14.3156	161	2742	65	21272	HNRNPU,XRCC3,SMC5,ZW10,BIRC5,PCID2,RCC1,ANAPC1,ANAPC11,CHEK1,BUB3,TUBG1,SMC3,CUL3,CDC16,KIF20B,PHB2,KIF11,CDC23,CDT1,NUMA1,RANBP1,BORA,PLK1,UBE2C,ATM,PSMG2,SPDL1,CDC27,AURKB,NSMCE2,CEP85,DRG1,BECN1,NAA10,SMC1A,ANAPC4,TPR,MAD2L1,MAD1L1,NIPBL,MTBP,TRIP13,ZFP207,CEP192,NEK2,MAD2L1BP,CHMP1A,NDC80,IK,NUP62,CDCA5,TTK,RAD21,ATRX,STAG2,CENPE,FBXO5,CDK11B,CDC42,APC,CCNB1,MKI67,ANAPC5,CDC26
protein localization to nucleus	GO:0034504	5.07772e-15	14.2943	293	2742	95	21272	ZPR1,PPP2CA,IPO13,TXN1,HNRNPU,STK11,SKP1A,IPO7,TFRC,HDAC3,MBTPS1,TNPO3,NUP85,TARDBP,POLA2,NXT1,SIN3A,RBM22,PARP1,NUP88,RAN,RRS1,SNUPN,STAT3,HEATR3,RPF2,TRIM28,TAF8,ECT2,PHB2,PAF1,NUTF2,RPL11,IPO4,CDK1,NMD3,NUP50,PIK3R2,KPNB1,EP300,RANGAP1,PLK1,KPNA2,NUP93,NUP107,XPO1,NF2,NF1,DMAP1,NUP214,ARL2,NOLC1,OGT,MCRS1,CSE1L,NUPL1,ING1,KAT7,FLCN,IPO5,BRCA1,HSP90AB1,POLR1A,NUP153,WRAP53,BARD1,TPR,NPM1,HSPA8,…
regulation of metaphase/anaphase transition of cell cycle	GO:1902099	5.55639e-15	14.2552	58	2742	36	21272	XRCC3,ZW10,BIRC5,PCID2,ANAPC11,BUB3,CUL3,CDC16,CDC23,CDT1,PLK1,UBE2C,ATM,PSMG2,SPDL1,CDC27,AURKB,NSMCE2,ANAPC4,TPR,MAD2L1,MAD1L1,TRIP13,ZFP207,CEP192,MAD2L1BP,NDC80,IK,TTK,RAD21,CENPE,FBXO5,APC,CCNB1,ANAPC5,CDC26
protein modification by small protein conjugation or removal	GO:0070647	6.59127e-15	14.181	912	2742	211	21272	PRPF19,CTU1,UBA1,VHL,PPIL2,FANCL,BRAP,DCAF7,MOCS3,COPS3,SKP1A,MED20,PSMD14,NEDD8,MED12,EIF3F,RNF40,DCAF13,DDX3X,RBX1,UBE2M,TRAIP,MED7,SDE2,MED10,SPOP,LZTR1,ANAPC1,ANAPC11,UBE2N,ARIH1,COPS4,RFWD3,DNAJA3,UBA2,DNM1L,BAP1,RPL5,DDB1,CUL3,SENP6,URM1,HUWE1,CDC16,RPS2,CDC73,KEAP1,TRIM71,ANAPC2,RNF8,KCTD10,UBA52,TRIM28,DET1,CTR9,UBA3,PAF1,MED21,BIRC6,GTPBP4,WAC,CUL4B,PEX12,MASTL,ENY2,USP37,U2AF2,MED30,RBB…
negative regulation of metabolic process	GO:0009892	6.84524e-15	14.1646	3195	2742	569	21272	PKMYT1,PNPT1,HIST1H2AE,HIST1H2AN,METTL14,PPP2CA,CLTC,VHL,CHMP6,KAT8,DR1,TXN1,SKIV2L,L3MBTL2,TYMS,EIF6,RTEL1,HNRNPU,ATP1A1,G6PDX,DDX5,POU5F1,NR0B1,STK11,DNAJC2,MAX,NELFB,UXT,NCBP1,HDAC1,LRPPRC,VDAC1,SMARCC1,TRIAP1,SMARCE1,CLP1,RNF40,CTCF,VPS25,DDX3X,ZFP281,RUVBL2,IGBP1,PFDN5,HDAC3,TRAIP,KDM8,ACTB,NACA,LIG3,APEX1,BIRC5,TEN1,PCID2,ELL,MRPL44,SAP130,PELO,QARS,PABPC1,MRTO4,GPI1,HIST2H3C1,NCBP2,ERCC4,T…
transcription initiation from RNA polymerase II promoter	GO:0006367	1.19577e-14	13.9224	65	2742	38	21272	DR1,POU5F1,MED12,GTF2B,GTF2A1,GTF2E2,POLR2I,GTF2F1,PSMC5,GTF2E1,TBP,PSMC6,PSMC4,MYC,MED30,DHX36,ERCC3,MED14,MED24,GTF2A2,MED4,CAND1,TAF5,POLR2D,MED16,PSMC2,POLR2G,TAF6,PSMC3,TAF2,MED17,TAF7,TAF6L,PAXIP1,GTF2F2,TAF11,THRAP3,ATF7IP
oxidative phosphorylation	GO:0006119	1.59477e-14	13.7973	117	2742	53	21272	ATP5A1,NDUFA8,TEFM,NDUFS2,ISCU,UQCRC1,SDHA,NDUFB9,DNAJC15,PGK1,COX7B,FXN,STOML2,ATP5H,NDUFS8,NDUFS1,ATP5B,ATP5C1,COX6C,UQCC2,NDUFB8,COX6B1,MYC,ATP5J2,MTCH2,CDK1,VCP,NDUFB6,ATP5K,CYCS,ATP5O,UQCRB,NDUFV2,UQCRFS1,UQCR10,ATP5J,NDUFA10,ATP5L,PDE12,COA6,ATP5D,UQCRQ,CYC1,DLD,SDHD,MSH2,SDHC,COX7C,ATP5E,UQCC3,CCNB1,NDUFC2,COX4I1
transcription by RNA polymerase II	GO:0006366	1.73822e-14	13.7599	1990	2742	385	21272	PPP2CA,VHL,KAT8,DR1,TXN1,ELP3,HNRNPU,SCAP,DDX5,POU5F1,NR0B1,MAX,MED26,MED20,UXT,HDAC1,NEDD8,MED12,SMARCC1,TRIAP1,CTCF,GTF2B,DDX3X,ZFP281,RUVBL2,ACTR3,IGBP1,CIAO1,HDAC3,EAF1,NACA,PCID2,MED7,GTF2A1,SOX2,ELL,SAP130,MED10,HIST2H3C1,ACTR2,SNF8,SSU72,SNAPC1,HIST1H3F,NCOA3,PCNA,CDK7,THAP11,SPOP,JMJD6,TOP2A,SIN3A,TADA1,ERCC2,HNRNPK,PARP1,CHEK1,MDM4,XRCC6,RPL10,GTF2E2,PRDM10,DNAJA3,POLR2A,RIF1,POLR2J,SMAR…
cellular protein modification process	GO:0006464	1.85355e-14	13.732	3820	2742	658	21272	HMBS,OXSR1,PKMYT1,VRK1,RABGGTA,PRPF19,CTU1,PPP2R1A,GLRX5,NDUFAF7,DOHH,UBA1,WDR82,PRMT5,PPP2CA,VHL,DPH5,BCCIP,CHMP6,KAT8,DR1,PPIL2,NRBP1,TXN1,FANCL,IKBKAP,L3MBTL2,RIOK1,ELP3,RABGGTB,TIMM50,DPAGT1,BRAP,G6PDX,PRMT1,PABPN1,ALG13,CDC37,PTP4A2,DCAF7,STK11,MOCS3,COPS3,TELO2,SKP1A,TFRC,FAM98B,DPH6,MRE11A,MED20,PSMD14,DPH2,HDAC1,DHX33,NEDD8,MED12,PPA2,ATP6V0C,EIF3F,DPH3,RNF40,CTCF,DCAF13,VPS25,GTF2B,DDX3X…
protein modification process	GO:0036211	1.85355e-14	13.732	3820	2742	658	21272	HMBS,OXSR1,PKMYT1,VRK1,RABGGTA,PRPF19,CTU1,PPP2R1A,GLRX5,NDUFAF7,DOHH,UBA1,WDR82,PRMT5,PPP2CA,VHL,DPH5,BCCIP,CHMP6,KAT8,DR1,PPIL2,NRBP1,TXN1,FANCL,IKBKAP,L3MBTL2,RIOK1,ELP3,RABGGTB,TIMM50,DPAGT1,BRAP,G6PDX,PRMT1,PABPN1,ALG13,CDC37,PTP4A2,DCAF7,STK11,MOCS3,COPS3,TELO2,SKP1A,TFRC,FAM98B,DPH6,MRE11A,MED20,PSMD14,DPH2,HDAC1,DHX33,NEDD8,MED12,PPA2,ATP6V0C,EIF3F,DPH3,RNF40,CTCF,DCAF13,VPS25,GTF2B,DDX3X…
negative regulation of macromolecule metabolic process	GO:0010605	1.85813e-14	13.7309	2946	2742	530	21272	PNPT1,HIST1H2AE,HIST1H2AN,METTL14,PPP2CA,CLTC,VHL,CHMP6,KAT8,DR1,TXN1,SKIV2L,L3MBTL2,TYMS,EIF6,RTEL1,HNRNPU,G6PDX,DDX5,POU5F1,NR0B1,DNAJC2,MAX,NELFB,UXT,NCBP1,HDAC1,LRPPRC,SMARCC1,TRIAP1,SMARCE1,CLP1,RNF40,CTCF,VPS25,DDX3X,ZFP281,RUVBL2,IGBP1,PFDN5,HDAC3,TRAIP,KDM8,ACTB,NACA,LIG3,APEX1,BIRC5,TEN1,PCID2,MRPL44,SAP130,PELO,QARS,PABPC1,MRTO4,GPI1,HIST2H3C1,NCBP2,ERCC4,TARDBP,EIF3A,HIST1H3F,PCNA,THAP…
telomere maintenance via telomerase	GO:0007004	2.46941e-14	13.6074	66	2742	38	21272	HNRNPU,TELO2,CCT7,CCT2,TCP1,TEN1,EXOSC10,DKC1,CCT3,CCT4,NAT10,TINF2,CCT5,RPA1,GNL3L,NHP2,ATM,PARN,AURKB,HNRNPA1,HNRNPC,PNKP,GAR1,CCT8,HSP90AB1,TERF1,NOP10,WRAP53,XRCC5,PINX1,NEK2,SMG7,SMG5,CTC1,MAPK1,DCP2,TERF2,ACD
positive regulation of DNA metabolic process	GO:0051054	2.72814e-14	13.5641	217	2742	77	21272	RTEL1,TFRC,MRE11A,CCT7,RFC2,CCT2,TCP1,RAD51,ACTR2,PCNA,RFC5,MMS19,ERCC2,PARP1,UBE2N,DKC1,RIF1,EXOSC3,RFC4,CCT3,GFER,CCT4,PFN1,RNF8,RFC3,TRIM28,DDX11,CCT5,MYC,TIMELESS,FH1,DHX36,CHTF18,RPS3,CHTF8,DSCC1,ATM,USP7,POLG2,PARN,AURKB,HMGB1,GNL3,HNRNPA1,NBN,PNKP,USP9X,BLM,CCT8,BRCA1,HSP90AB1,WRAP53,BABAM1,NPM1,CDK2,XRCC5,FUS,PRKDC,NEK2,PAXIP1,PRKCD,NVL,NAF1,MAPK1,PPP1R10,OTUD4,XRCC1,MSH2,ARID2,ATRX,TERF2…
positive regulation of mitotic cell cycle	GO:0045931	3.25067e-14	13.488	162	2742	64	21272	HNRNPU,XRCC3,SMC5,DDX3X,APEX1,BIRC5,PCID2,LSM11,DBF4,ANAPC11,SIN3A,LSM10,CUL3,NANOG,CDC16,KIF20B,PHB2,BRD4,CUL4B,CDT1,CDK1,NUMA1,RANBP1,RPTOR,UBE2C,POLDIP2,RAD51C,ANP32B,CDC27,AURKB,ANKRD17,HMGB1,NSMCE2,CDK4,BECN1,TFDP1,CDC7,ANAPC4,TPR,EIF4E,MAD2L1,NIPBL,PTPN11,MTBP,MDM2,CDC45,CCNE1,NDC80,ASNS,RAD51B,HES1,NUP62,PPP1R10,CDCA5,BRCA2,USP22,FBXO5,CCND3,PAFAH1B1,MEPCE,CCNB1,ANAPC5,CDC25A,RPS6KB1
translational initiation	GO:0006413	4.00312e-14	13.3976	119	2742	53	21272	EIF2S3X,EIF6,EIF1AD,NCBP1,DHX33,EIF3F,DDX3X,DHX29,EIF3K,EIF3D,NCBP2,EIF2B1,EIF3A,ABCE1,EIF5,EIF3C,EIF2B2,EIF3I,RPS2,EIF2B3,MTFMT,EIF3H,EIF2B4,EIF3L,MTIF2,EIF2B5,EIF2S1,EIF4E2,GM5662,EIF4A1,ORAOV1,EIF3E,GM8300,POLR2D,POLR2G,MTIF3,GLE1,EIF3B,ALKBH1,TPR,EIF4E,NPM1,EIF3G,ABCF1,DAZL,EIF3M,KHDRBS1,EIF3J1,PAIP1,METTL3,GM21319,RPS6KB1,EIF2S2
maturation of 5.8S rRNA	GO:0000460	4.14013e-14	13.383	31	2742	25	21272	EIF6,MAK16,BOP1,WDR12,EXOSC10,EXOSC3,RRS1,FTSJ3,EXOSC2,MPHOSPH6,ABT1,EXOSC8,SKIV2L2,EXOSC7,RPS21,NSA2,C1D,FCF1,EXOSC4,NPM1,RCL1,RRP15,RPF1,LAS1L,PES1
spindle assembly	GO:0051225	4.40264e-14	13.3563	108	2742	50	21272	CLTC,BCCIP,HNRNPU,HAUS4,RACGAP1,HDAC3,TUBB5,BIRC5,RCC1,SMC3,INCENP,SENP6,TUBGCP5,HAUS7,MAPRE1,KIF11,KIF23,MYBL2,CENPW,HAUS3,NUMA1,RPS3,TPX2,KPNB1,PLK1,TUBGCP4,HAUS5,AURKA,TUBGCP2,AURKB,DYNC1H1,DRG1,INO80,SMC1A,CDC20,TPR,SPAG5,ZFP207,TUBGCP3,CEP192,NEK2,CHMP1A,MZT1,KIF4,HAUS2,HAUS8,STAG2,HAUS1,FBXO5,TUBGCP6
RNA-dependent DNA biosynthetic process	GO:0006278	4.99843e-14	13.3012	67	2742	38	21272	HNRNPU,TELO2,CCT7,CCT2,TCP1,TEN1,EXOSC10,DKC1,CCT3,CCT4,NAT10,TINF2,CCT5,RPA1,GNL3L,NHP2,ATM,PARN,AURKB,HNRNPA1,HNRNPC,PNKP,GAR1,CCT8,HSP90AB1,TERF1,NOP10,WRAP53,XRCC5,PINX1,NEK2,SMG7,SMG5,CTC1,MAPK1,DCP2,TERF2,ACD
regulation of telomere maintenance via telomere lengthening	GO:1904356	5.4971e-14	13.2599	64	2742	37	21272	RTEL1,HNRNPU,CCT7,CCT2,TCP1,TEN1,ERCC4,EXOSC10,DKC1,CCT3,CCT4,NAT10,TINF2,CCT5,DHX36,GNL3L,ATM,PARN,AURKB,MCRS1,HNRNPA1,HNRNPC,PNKP,CCT8,TERF1,XRCC5,PINX1,NEK2,SMG7,SMG5,NAF1,CTC1,MAPK1,DCP2,TERF2,SLX4,ACD
protein transmembrane transport	GO:0071806	5.98835e-14	13.2227	58	2742	35	21272	TIMM17A,TIMM50,TOMM22,DNAJC15,SEC61A1,TIMM44,PAM16,GRPEL1,PEX12,CHCHD4,AIFM1,ROMO1,PEX10,TIMM23,HSPD1,TOMM7,SEC63,PEX5,TOMM40,SEC61B,SEC61G,SRP54B,HSPA8,SRP54A,AKT2,PEX13,TIMM22,PEX2,PEX1,TOMM20,PEX7,HSPA5,PEX6,DNLZ,PEX16
nuclear-transcribed mRNA catabolic process	GO:0000956	9.95422e-14	13.002	106	2742	49	21272	SKIV2L,DDX5,NCBP1,PCID2,PELO,PABPC1,MRTO4,NCBP2,LSM7,EXOSC10,UPF1,EXOSC3,CNOT3,MAGOH,SMG1,SSB,EXOSC2,DHX36,MTPAP,EXOSC5,ETF1,EXOSC8,EXOSC7,CNOT8,EIF3E,PRPF18,ATM,POLR2D,PDE12,POLR2G,ZFP36L1,EXOSC4,EIF4A3,DCPS,RBM8A,GSPT1,SMG7,SMG5,CNOT2,LSM3,CNOT1,LSM4,THRAP3,DCP2,UPF2,RNPS1,SMG9,XRN1,SECISBP2
cell cycle DNA replication	GO:0044786	1.01734e-13	12.9925	39	2742	28	21272	ZPR1,MCM4,RTEL1,MCM2,RAD51,MCM7,PCNA,DBF4,UPF1,ORC3,DNA2,CDT1,DONSON,MCM6,INO80,CDC7,MCM5,GINS1,CDC45,SENP2,BRCA2,GMNN,ATRX,ZFP830,FBXO5,MCM3,POLA1,ATAD5
metaphase plate congression	GO:0051310	1.2221e-13	12.9129	62	2742	36	21272	CHMP6,HNRNPU,ZW10,KIF2C,INCENP,RRS1,CUL3,KIF18A,MIS12,CDC23,CDT1,NUMA1,KPNB1,CHAMP1,DCTN2,SPDL1,AURKB,DYNC1H1,BECN1,SPAG5,MAD1L1,CENPC1,PINX1,CHMP1A,NDC80,NUP62,CDCA5,CDCA8,BRCA2,CHMP7,CENPE,KIF22,SEH1L,CCNB1,KIF14,CENPQ
chromosome localization	GO:0050000	1.59755e-13	12.7965	82	2742	42	21272	CHMP6,HNRNPU,ACTR3,ZW10,BIRC5,ACTR2,KIF2C,INCENP,RRS1,CUL3,KIF18A,MIS12,CDC23,CDT1,NUMA1,KPNB1,CHAMP1,DCTN2,ATM,SPDL1,AURKB,DYNC1H1,BECN1,TERF1,SPAG5,KATNB1,MAD1L1,CENPC1,PINX1,CHMP1A,NDC80,NUP62,CDCA5,CDCA8,BRCA2,CHMP7,CENPE,KIF22,SEH1L,CCNB1,KIF14,CENPQ
establishment of chromosome localization	GO:0051303	1.59755e-13	12.7965	82	2742	42	21272	CHMP6,HNRNPU,ACTR3,ZW10,BIRC5,ACTR2,KIF2C,INCENP,RRS1,CUL3,KIF18A,MIS12,CDC23,CDT1,NUMA1,KPNB1,CHAMP1,DCTN2,ATM,SPDL1,AURKB,DYNC1H1,BECN1,TERF1,SPAG5,KATNB1,MAD1L1,CENPC1,PINX1,CHMP1A,NDC80,NUP62,CDCA5,CDCA8,BRCA2,CHMP7,CENPE,KIF22,SEH1L,CCNB1,KIF14,CENPQ
transcription preinitiation complex assembly	GO:0070897	1.88959e-13	12.7236	37	2742	27	21272	DR1,GTF2B,PIH1D1,SMARCA4,UBTF,BRF2,PSMC5,TBP,PSMC6,TAF1C,PSMC4,GTF2A2,CAND1,BRF1,SMARCB1,PSMC2,TAF6,PSMC3,TAF7,TAF6L,TAF1B,RRN3,BDP1,GTF2F2,TAF11,ATF7IP,POLR1E
negative regulation of cellular macromolecule biosynthetic process	GO:2000113	2.42906e-13	12.6146	1518	2742	306	21272	HIST1H2AE,HIST1H2AN,METTL14,PPP2CA,VHL,KAT8,DR1,TXN1,TYMS,EIF6,HNRNPU,DDX5,POU5F1,NR0B1,DNAJC2,MAX,NELFB,UXT,HDAC1,SMARCE1,CTCF,DDX3X,ZFP281,IGBP1,PFDN5,HDAC3,KDM8,NACA,LIG3,BIRC5,TEN1,SAP130,QARS,HIST2H3C1,TARDBP,HIST1H3F,PCNA,THAP11,SPOP,DHFR,SIN3A,HNRNPK,EXOSC10,ATR,CHEK1,MDM4,UPF1,XRCC6,RPL10,DNAJA3,RIF1,SETDB1,SMARCA4,BAP1,CNOT3,CNOT10,NACC1,CUL3,NELFCD,KAT5,FAM208A,PSMC5,ILF3,NANOG,TFCP2L1,…
nucleosome assembly	GO:0006334	2.57836e-13	12.5887	108	2742	49	21272	RBBP4,GRWD1,MCM2,HIST2H3C1,HIST1H4H,HIST1H3F,SMARCA4,HIST1H2BN,HIST1H4N,CHAF1B,HIST1H2BP,HIST1H3G,IPO4,HIST1H4M,HIST1H3D,HIST2H2AA2,DAXX,HIST2H3B,HIST1H4B,HIST1H3H,HIST1H4A,ANP32B,HIST1H4F,SMARCA5,CHAF1A,HIST1H2BK,BRD2,HIST1H2BF,HIST1H3E,HIST1H2BH,HAT1,HIST1H4J,OIP5,HIST1H4K,HIST1H3A,NPM1,HIST1H3I,HIST1H2BM,HIST2H2AA1,HIST1H4D,HIST1H2BL,SART3,HIST3H2BA,HIST1H2BJ,HIST1H3C,CENPP,ATRX,HIST1H4C,HIRA
negative regulation of cellular metabolic process	GO:0031324	2.68924e-13	12.5704	2702	2742	488	21272	PKMYT1,HIST1H2AE,HIST1H2AN,METTL14,PPP2CA,CLTC,VHL,CHMP6,KAT8,DR1,TXN1,L3MBTL2,TYMS,EIF6,RTEL1,HNRNPU,ATP1A1,G6PDX,DDX5,POU5F1,NR0B1,DNAJC2,MAX,NELFB,UXT,HDAC1,LRPPRC,VDAC1,SMARCC1,TRIAP1,SMARCE1,RNF40,CTCF,VPS25,DDX3X,ZFP281,RUVBL2,IGBP1,PFDN5,HDAC3,KDM8,ACTB,NACA,LIG3,BIRC5,TEN1,PCID2,ELL,SAP130,QARS,PABPC1,GPI1,HIST2H3C1,ERCC4,TARDBP,EIF3A,HIST1H3F,PCNA,THAP11,SPOP,DHFR,ABCE1,SIN3A,HNRNPK,EXOS…
mRNA-containing ribonucleoprotein complex export from nucleus	GO:0071427	2.84568e-13	12.5458	54	2742	33	21272	THOC3,PABPN1,NCBP1,PCID2,NUP85,RAE1,NUP88,SRSF3,THOC6,THOC1,ENY2,SARNP,NUP93,NUP107,SETD2,NUP214,NUP160,POLR2D,THOC5,GLE1,THOC2,POLDIP3,TPR,MCM3AP,NSUN2,NXF1,NUP155,IWS1,EIF5A,NUP133,SUPT6,ALKBH5,DDX39
mRNA export from nucleus	GO:0006406	2.84568e-13	12.5458	54	2742	33	21272	THOC3,PABPN1,NCBP1,PCID2,NUP85,RAE1,NUP88,SRSF3,THOC6,THOC1,ENY2,SARNP,NUP93,NUP107,SETD2,NUP214,NUP160,POLR2D,THOC5,GLE1,THOC2,POLDIP3,TPR,MCM3AP,NSUN2,NXF1,NUP155,IWS1,EIF5A,NUP133,SUPT6,ALKBH5,DDX39
negative regulation of macromolecule biosynthetic process	GO:0010558	2.90994e-13	12.5361	1589	2742	317	21272	HIST1H2AE,HIST1H2AN,METTL14,PPP2CA,CLTC,VHL,KAT8,DR1,TXN1,TYMS,EIF6,HNRNPU,DDX5,POU5F1,NR0B1,DNAJC2,MAX,NELFB,UXT,HDAC1,SMARCE1,CTCF,DDX3X,ZFP281,RUVBL2,IGBP1,PFDN5,HDAC3,KDM8,NACA,LIG3,BIRC5,TEN1,SAP130,QARS,HIST2H3C1,TARDBP,HIST1H3F,PCNA,THAP11,SPOP,DHFR,SIN3A,HNRNPK,EXOSC10,ATR,DDX54,CHEK1,MDM4,UPF1,XRCC6,RPL10,DNAJA3,RIF1,SETDB1,SMARCA4,BAP1,CNOT3,CNOT10,NACC1,CUL3,NELFCD,KAT5,FAM208A,PSMC5,I…
ATP metabolic process	GO:0046034	3.59854e-13	12.4439	258	2742	84	21272	ATP5A1,NDUFA8,ATP6V1A,ATP6V1B2,EIF6,TEFM,NDUFS2,ISCU,UQCRC1,GPI1,SDHA,ALDOA,NDUFB9,PARP1,DNAJC15,PGAM1,PGK1,COX7B,DNM1L,FXN,STOML2,OGDH,ATP5H,NDUFS8,NDUFS1,ATP5B,STAT3,ATP5C1,COX6C,UQCC2,NDUFB8,LDHA,FIGNL1,COX6B1,MYC,ATP5J2,MTCH2,TPI1,PKM,CDK1,VCP,GUK1,NDUFB6,EP300,OLA1,ATP5K,CYCS,ATP5O,UQCRB,NDUFV2,UQCRFS1,UQCR10,ATP5J,HK2,NDUFA10,PFKP,FOXK1,ATP5L,OGT,PDE12,COA6,ATP5D,FLCN,GAPDH,UQCRQ,CYC1,HSPA8…
regulation of nuclear division	GO:0051783	4.58145e-13	12.339	191	2742	69	21272	HNRNPU,XRCC3,SMC5,ZW10,BIRC5,PCID2,RCC1,ANAPC1,ANAPC11,CHEK1,BUB3,TUBG1,SMC3,CUL3,CDC16,KIF20B,RAD1,PHB2,KIF11,CDC23,CDT1,NUMA1,RANBP1,BORA,PRKAR1A,PLK1,UBE2C,ATM,PSMG2,SPDL1,CDC27,AURKB,NSMCE2,CEP85,DRG1,BECN1,NAA10,SMC1A,CDC20,ANAPC4,TPR,MAD2L1,MAD1L1,NIPBL,MTBP,TRIP13,ZFP207,CEP192,NEK2,DAZL,MAD2L1BP,CHMP1A,NDC80,IK,NUP62,CDCA5,TTK,RAD21,ATRX,STAG2,CENPE,FBXO5,CDK11B,CDC42,APC,CCNB1,MKI67,ANAP…
mitotic metaphase plate congression	GO:0007080	5.06935e-13	12.295	46	2742	30	21272	CHMP6,HNRNPU,ZW10,KIF2C,RRS1,CUL3,KIF18A,MIS12,CDC23,CDT1,KPNB1,CHAMP1,DCTN2,SPDL1,AURKB,BECN1,MAD1L1,CENPC1,PINX1,CHMP1A,NDC80,NUP62,CDCA5,CDCA8,CHMP7,CENPE,KIF22,SEH1L,CCNB1,KIF14
blastocyst development	GO:0001824	5.62977e-13	12.2495	137	2742	56	21272	PRPF19,ZPR1,SBDS,POU5F1,NDUFA2,MFN2,PELO,CHEK1,NLE1,EMG1,SMARCA4,CNOT3,RRP7A,CUL3,NCAPG2,TAF8,CTR9,MED21,BRD4,PSMC4,SUDS3,RTF1,RPL7L1,PRDM14,ACTL6A,PBRM1,SMARCB1,SP1,PSMC3,RBBP8,NBN,HCFC1,WDR74,THOC2,DAD1,USPL1,NEK2,BYSL,GINS1,TBL1XR1,RAD51B,MATR3,CNOT2,CNOT1,BCOR,SF3B6,LATS1,BRCA2,PALB2,SUPT6,ZFP830,CDK11B,XAB2,PHF6,GINS4,CITED2
protein acetylation	GO:0006473	5.82256e-13	12.2349	205	2742	72	21272	KAT8,DR1,L3MBTL2,HDAC1,CTCF,GTF2B,DDX3X,RUVBL2,NAA15,SETD5,NCOA3,SIN3A,TADA1,PIH1D1,CHEK1,POLE3,YEATS4,SMARCA4,KAT5,GTF3C4,MEAF6,BRD4,KANSL3,BRPF1,TRRAP,WDR5,NAA35,NAA20,EP300,MED24,ACTL6A,BLOC1S1,MORF4L2,EP400,DMAP1,DSCC1,RUVBL1,ESCO2,SMARCB1,OGT,MCRS1,MDH2,NAA50,HAT1,DPF2,KAT7,FLCN,HCFC1,BRCA1,NAA10,NAA25,TAF7,NAA40,KANSL2,MCM3AP,MSL1,TAF6L,ING3,PAXIP1,IWS1,MBIP,BRCA2,ING5,ING4,NAT9,USP22,YEATS…
DNA replication-dependent nucleosome assembly	GO:0006335	6.00707e-13	12.2213	33	2742	25	21272	RBBP4,HIST2H3C1,HIST1H4H,HIST1H3F,HIST1H4N,CHAF1B,HIST1H3G,IPO4,HIST1H4M,HIST1H3D,HIST2H3B,HIST1H4B,HIST1H3H,HIST1H4A,HIST1H4F,CHAF1A,HIST1H3E,HAT1,HIST1H4J,HIST1H4K,HIST1H3A,HIST1H3I,HIST1H4D,HIST1H3C,HIST1H4C
DNA replication-dependent nucleosome organization	GO:0034723	6.00707e-13	12.2213	33	2742	25	21272	RBBP4,HIST2H3C1,HIST1H4H,HIST1H3F,HIST1H4N,CHAF1B,HIST1H3G,IPO4,HIST1H4M,HIST1H3D,HIST2H3B,HIST1H4B,HIST1H3H,HIST1H4A,HIST1H4F,CHAF1A,HIST1H3E,HAT1,HIST1H4J,HIST1H4K,HIST1H3A,HIST1H3I,HIST1H4D,HIST1H3C,HIST1H4C
mRNA 3'-end processing	GO:0031124	6.01337e-13	12.2209	58	2742	34	21272	PNPT1,CPSF3,PABPN1,CPSF1,NCBP1,CPSF2,CLP1,RNF40,NCBP2,SSU72,LSM11,FIP1L1,RPRD1B,TUT1,CDC73,NUDT21,CTR9,PAF1,DHX36,MTPAP,SUPT5,CDK9,RNF20,CPSF4,POLR2D,WDR33,ZC3H3,CSTF2,ZFP36L1,NELFE,PCF11,SLBP,CCNB1,CCNT1
modification-dependent macromolecule catabolic process	GO:0043632	1.17438e-12	11.9302	615	2742	152	21272	PNPT1,UBA1,COPS3,SKP1A,PSMD14,NEDD8,SMARCC1,RNF40,VPS25,RBX1,PSMB6,SNF8,SPOP,ANAPC1,ANAPC11,EXOSC10,UBE2N,ARIH1,PSMA1,PSMD2,EXOSC3,PDCL3,PSMA6,BAP1,PSMA5,RPL5,DDB1,CUL3,KAT5,PSMC5,HUWE1,CDC16,KEAP1,PSMD4,TRIM71,ANAPC2,RNF8,EXOSC2,KCTD10,UBA52,PSMD3,PSMB1,PSMC6,DET1,PSMD6,CSNK1A1,FAF2,BIRC6,WAC,CUL4B,PSMA3,USP37,RBBP6,UBE2G2,USP10,PTPN23,UBE4B,RPL11,SUMO2,PSMB4,VCP,PSMB7,USP16,EXOSC8,UHRF1,EXOSC7,…
transcription elongation from RNA polymerase II promoter	GO:0006368	1.22867e-12	11.9106	47	2742	30	21272	HNRNPU,PCID2,ELL,ELP2,POLR2I,GTF2F1,NELFCD,CDC73,RNF8,CTR9,PAF1,BRD4,ENY2,SUPT5,RTF1,WDR43,NELFA,CDK9,SETD2,ELOF1,PBRM1,EAPP,WDR61,EZH2,NELFE,SUPT4A,ADRM1,GTF2F2,SUPT6,RNF168
regulation of RNA splicing	GO:0043484	1.55677e-12	11.8078	152	2742	59	21272	PRPF19,ZPR1,HNRNPU,DDX5,NCBP1,SF3B4,JMJD6,SRSF1,RBM22,HNRNPK,POLR2A,SRSF3,SFSWAP,MAGOH,HNRNPF,ZC3H10,SRSF5,SMN1,SRSF7,HNRNPL,PTBP1,U2AF2,SMU1,TRA2B,RPS26,RPS13,METTL16,RBM25,SNRNP70,WTAP,RBM17,NCL,HNRNPA1,EIF4A3,RBM39,SRSF10,NPM1,HSPA8,RBM8A,FUS,AKT2,DYRK1A,RBFOX2,SRSF2,SART3,IK,DAZAP1,RBM15,PQBP1,RBM19,THRAP3,CIRBP,KHDRBS1,RNPS1,BC005624,SRSF6,DDX17,RBM10,NUP98
transcription by RNA polymerase III	GO:0006383	1.63153e-12	11.7874	39	2742	27	21272	GTF3C1,CRCP,ELL,POLR3F,SNAPC1,BRF2,POLR3H,POLR3K,SNAPC5,TBP,POLR1C,GTF3C3,DHX36,CHD8,GTF3C6,RPTOR,SNAPC4,POLR2L,POLR2H,BRF1,ICE2,GTF3C5,ZC3H8,POLR3D,BDP1,ICE1,MTOR
ribosomal large subunit assembly	GO:0000027	1.63567e-12	11.7863	29	2742	23	21272	RPLP0,RSL24D1,MRTO4,BOP1,NLE1,MDN1,RPL10,RPL12,DDX28,RPL5,RRS1,PPAN,MRPL11,RPF2,RPL6,RPL11,RPL24,DHX30,RPL38,RPL23A,MRPL20,RPL3,BRIX1
DNA replication initiation	GO:0006270	1.63567e-12	11.7863	29	2742	23	21272	MCM4,ORC5,MCM2,MCM7,POLA2,WDR18,ORC3,MCM9,CDT1,TOPBP1,RECQL4,ORC4,MCM6,KAT7,ORC1,MCM5,CDK2,CDC45,MCM10,CCNE1,MCM8,MCM3,POLA1
nuclear DNA replication	GO:0033260	1.99068e-12	11.701	34	2742	25	21272	MCM4,RTEL1,MCM2,RAD51,MCM7,PCNA,DBF4,UPF1,ORC3,DNA2,CDT1,DONSON,MCM6,INO80,CDC7,MCM5,GINS1,CDC45,BRCA2,GMNN,ATRX,ZFP830,MCM3,POLA1,ATAD5
maintenance of cell number	GO:0098727	2.07469e-12	11.683	157	2742	60	21272	METTL14,POU5F1,MED12,VPS72,MED7,SOX2,PELO,MED10,TPT1,SMC3,RIF1,SMARCA4,LIG4,CNOT3,NANOG,CDC73,STAT3,CTR9,PAF1,MED21,MYC,MED30,RTF1,WDR43,PRDM14,MED14,MED24,MTF2,GNL3,RBPJ,FANCD2,MCPH1,MED28,EZH2,SMC1A,MED17,EIF4E,PCM1,ZFP706,NIPBL,TAF6L,ZC3H13,SETD1A,ELAVL1,HES1,CNOT2,CNOT1,EIF4ENIF1,STAG2,DDX6,MED27,KLF4,TAF5L,SRRT,TBX3,FANCC,JMJD1C,MED15,ARID1A,NKAP
stem cell population maintenance	GO:0019827	2.21886e-12	11.6539	153	2742	59	21272	METTL14,POU5F1,MED12,VPS72,MED7,SOX2,PELO,MED10,TPT1,SMC3,RIF1,SMARCA4,LIG4,CNOT3,NANOG,CDC73,STAT3,CTR9,PAF1,MED21,MYC,MED30,RTF1,WDR43,PRDM14,MED14,MED24,MTF2,GNL3,RBPJ,FANCD2,MCPH1,MED28,SMC1A,MED17,EIF4E,PCM1,ZFP706,NIPBL,TAF6L,ZC3H13,SETD1A,ELAVL1,HES1,CNOT2,CNOT1,EIF4ENIF1,STAG2,DDX6,MED27,KLF4,TAF5L,SRRT,TBX3,FANCC,JMJD1C,MED15,ARID1A,NKAP
protein localization	GO:0008104	2.40797e-12	11.6183	2653	2742	476	21272	PRPF19,NSF,VPS29,ZPR1,GOLT1B,PPP2CA,CLTC,VHL,IPO13,CHMP6,THOC3,PPIL2,TXN1,MIOS,EXOC7,EIF6,HNRNPU,TIMM17A,TIMM10,TIMM50,PABPN1,NUP43,LAMTOR4,NR0B1,STK11,SKP1A,YKT6,IPO7,HSPA4,TFRC,NCBP1,NUBP1,HDAC1,NEDD8,SRP72,CENPA,CCT7,DPH3,CTCF,TOMM22,VPS25,DDX3X,RUVBL2,ACTR3,HSPA9,ZW10,ARF1,HDAC3,CCT2,MFN2,TCP1,MTX2,MBTPS1,ACTB,NACA,BIRC5,PCID2,TNPO3,NAPA,NUP85,GPI1,SNF8,TARDBP,POLA2,GOSR2,ARPC2,ABCE1,NXT1,DDX…
generation of precursor metabolites and energy	GO:0006091	3.80061e-12	11.4201	449	2742	120	21272	PNPT1,ATP5A1,GLRX5,SCO2,NDUFA8,EIF6,TXNRD2,G6PDX,TEFM,NDUFS2,ISCU,GLRX3,DLST,IL6ST,UQCRC1,GPI1,SDHA,ALDOA,NDUFB9,DNAJC15,PGAM1,PGK1,COX7B,COX10,PPP1R2,FXN,NDUFS7,STOML2,OGDH,ATP5H,NDUFS8,NDUFS1,ATP5B,STAT3,ATP5C1,COX6C,UQCC2,MYBBP1A,NDUFB8,LDHA,PHB2,COX17,COX6B1,CHCHD4,MYC,FH1,SDHB,AIFM1,ATP5J2,MTCH2,TPI1,PKM,CDK1,VCP,NDUFB6,PRELID1,PGD,COX5B,EP300,ATP5K,CYCS,BLOC1S1,ATP5O,UQCRB,NDUFV2,UQCRFS1,UQ…
cellular nitrogen compound catabolic process	GO:0044270	3.94258e-12	11.4042	397	2742	110	21272	PNPT1,METTL14,ZPR1,FEN1,SKIV2L,DDX49,HNRNPU,DUT,DDX5,NCBP1,ITPA,LRPPRC,APEX1,PCID2,PELO,PABPC1,MRTO4,NCBP2,TARDBP,LSM2,RNASEH2A,LSM7,EXOSC10,UPF1,DKC1,DIS3,EXOSC3,CNOT3,CNOT10,RNASEH2B,FASTKD1,MAGOH,PAM16,DNA2,SMG1,TRIM71,SSB,EXOSC2,AHCY,SUPV3L1,RNASEH2C,DHX36,AIFM1,LSM6,MTPAP,EXOSC5,VCP,ETF1,EXOSC8,SKIV2L2,EXOSC7,MGAT1,CNOT8,DROSHA,METTL16,EIF3E,PRPF18,ATM,PARN,POLR2D,YBX1,PDE12,POLR2G,POP1,LSM5…
regulation of DNA biosynthetic process	GO:2000278	4.05902e-12	11.3916	126	2742	52	21272	HNRNPU,DNAJC2,CCT7,RFC2,CCT2,TCP1,TEN1,PCNA,RFC5,EXOSC10,CHEK1,DKC1,RFC4,CCT3,GFER,CCT4,RFC3,NAT10,TINF2,CCT5,MYC,CHTF18,GNL3L,CHTF8,DSCC1,ATM,POLG2,PARN,AURKB,MCRS1,HNRNPA1,HNRNPC,PNKP,CCT8,HSP90AB1,TFDP1,TERF1,WRAP53,NPM1,XRCC5,PINX1,NEK2,SMG7,SMG5,NVL,NAF1,CTC1,MAPK1,DCP2,TERF2,KLF4,ACD
positive regulation of organelle organization	GO:0010638	4.58397e-12	11.3388	613	2742	150	21272	FEN1,L3MBTL2,RTEL1,HNRNPU,SMC5,CDC37,MRE11A,CCT7,RNF40,RUVBL2,ACTR3,ARF1,OPA1,CCT2,MFN2,SSBP1,TCP1,BIRC5,ACTR2,MFN1,ARPC4,ARPC2,ANAPC11,SIN3A,UBE2N,PIH1D1,RICTOR,DKC1,RIF1,SETDB1,DNM1L,LIG4,WDR1,CCT3,CUL3,FAM208A,CCT4,HUWE1,PFN1,CDC16,DNMT1,TRIM28,GTF2H2,CTR9,PHB2,DDX11,GRB2,PAF1,MAPRE1,CCT5,BRD4,DHX36,CDT1,WDR5,RTF1,NUMA1,MLST8,RPS3,RANBP1,VPS13D,EP300,NELFA,NF2,CDK9,UBE2C,JARID2,MPHOSPH8,RNF20,…
positive regulation of cell cycle process	GO:0090068	4.73148e-12	11.325	254	2742	81	21272	FEN1,HNRNPU,XRCC3,SMC5,RACGAP1,DDX3X,APEX1,BIRC5,PCID2,LSM11,DBF4,ANAPC11,SIN3A,LSM10,CUL3,CDC16,CDC73,KIF20B,MYBBP1A,ECT2,PHB2,DDX11,PAF1,BRD4,CUL4B,KIF23,CDT1,CDK1,NUMA1,RANBP1,RPTOR,CHMP3,UBE2C,RAD51C,ANP32B,CDC27,AURKB,DYNC1H1,ANKRD17,NSMCE2,RPL26,CDK4,BECN1,BRCA1,INO80,TFDP1,CDC7,EZH2,ORC1,ANAPC4,TPR,NPM1,SPAG5,MAD2L1,NIPBL,ZBTB17,MTBP,CENPJ,MDM2,DAZL,CDC45,RPL23,CCNE1,NDC80,MED25,RAD51B,NUP…
regulation of mRNA splicing, via spliceosome	GO:0048024	5.73367e-12	11.2416	115	2742	49	21272	PRPF19,HNRNPU,DDX5,NCBP1,SF3B4,JMJD6,SRSF1,HNRNPK,SRSF3,SFSWAP,MAGOH,ZC3H10,SRSF5,SRSF7,HNRNPL,PTBP1,U2AF2,SMU1,TRA2B,METTL16,RBM25,SNRNP70,WTAP,RBM17,NCL,HNRNPA1,EIF4A3,RBM39,SRSF10,NPM1,HSPA8,RBM8A,DYRK1A,RBFOX2,SRSF2,SART3,IK,DAZAP1,RBM15,RBM19,THRAP3,CIRBP,KHDRBS1,RNPS1,BC005624,SRSF6,DDX17,RBM10,NUP98
maturation of LSU-rRNA	GO:0000470	6.15146e-12	11.211	30	2742	23	21272	EIF6,MAK16,BOP1,WDR12,DDX18,FTSJ3,RPF2,GTPBP4,RPL7A,RPL7L1,NHP2,NSA2,RPL7,ZNHIT6,RPL35,RSL1D1,NPM1,RRP15,MRPL1,ZNHIT3,RPF1,LAS1L,PES1
import into nucleus	GO:0051170	9.13831e-12	11.0391	170	2742	62	21272	ZPR1,PPP2CA,IPO13,IPO7,HDAC3,MBTPS1,TNPO3,NUP85,TARDBP,POLA2,NXT1,RBM22,NUP88,RAN,SNUPN,STAT3,HEATR3,TRIM28,ECT2,PHB2,NUTF2,IPO4,CDK1,NUP50,PIK3R2,KPNB1,EP300,KPNA2,NUP93,NUP107,NF1,DMAP1,NUP214,NOLC1,CSE1L,NUPL1,ING1,HNRNPA1,IPO5,BRCA1,HSP90AB1,NUP153,TPR,HSPA8,TNPO1,NUP155,CDH1,PRKCD,ELAVL1,MAPK1,NUP62,UBR5,NUP133,KPNA1,IPO11,IPO9,MAPK14,RPAIN,KPNA6,HTATIP2,NUP54,NUP98
heterocycle catabolic process	GO:0046700	1.01373e-11	10.9941	402	2742	110	21272	PNPT1,METTL14,ZPR1,FEN1,SKIV2L,DDX49,HNRNPU,DUT,DDX5,NCBP1,ITPA,LRPPRC,APEX1,PCID2,PELO,PABPC1,MRTO4,NCBP2,TARDBP,LSM2,RNASEH2A,LSM7,EXOSC10,UPF1,DKC1,DIS3,EXOSC3,CNOT3,CNOT10,RNASEH2B,FASTKD1,MAGOH,PAM16,DNA2,SMG1,TRIM71,SSB,EXOSC2,AHCY,SUPV3L1,RNASEH2C,DHX36,AIFM1,LSM6,MTPAP,EXOSC5,VCP,ETF1,EXOSC8,SKIV2L2,EXOSC7,MGAT1,CNOT8,DROSHA,METTL16,EIF3E,PRPF18,ATM,PARN,POLR2D,YBX1,PDE12,POLR2G,POP1,LSM5…
microtubule cytoskeleton organization	GO:0000226	1.34086e-11	10.8726	598	2742	146	21272	PPP2R1A,ZPR1,CLTC,BCCIP,WDR73,SBDS,HNRNPU,XRCC3,HAUS4,UXT,NUBP1,RACGAP1,CENPA,PPP2R3C,ZW10,HDAC3,TUBB5,BIRC5,RCC1,TBCD,KIF2C,DNAAF5,CHEK1,RAE1,TUBG1,SMC3,INCENP,SENP6,KIF18A,DCTN6,SMN1,SKA2,TUBGCP5,HAUS7,E2F4,FIGNL1,MAPRE1,KIF11,KIF23,MYBL2,CENPW,HAUS3,TUBA1A,NUMA1,VCP,TUBA1C,RPS3,RANBP1,BORA,TPX2,CHMP3,KPNB1,PLK1,TUBGCP4,XPO1,TUBA1B,KIF18B,SETD2,HAUS5,DCTN2,DYNLT1F,GM5891,AURKA,CKAP5,ARL2,TUBGCP…
cellular respiration	GO:0045333	1.39995e-11	10.8539	167	2742	61	21272	PNPT1,SCO2,NDUFA8,NDUFS2,ISCU,DLST,UQCRC1,SDHA,NDUFB9,DNAJC15,COX10,FXN,NDUFS7,OGDH,NDUFS8,NDUFS1,MYBBP1A,NDUFB8,CHCHD4,MYC,FH1,SDHB,AIFM1,MTCH2,CDK1,VCP,NDUFB6,PRELID1,CYCS,BLOC1S1,UQCRB,NDUFV2,UQCRFS1,UQCR10,NDUFA5,POLG2,NDUFA10,PIK3CA,COA6,MDH2,ATP5D,FLCN,MTFR1,ADSL,UQCRQ,CYC1,ETFDH,DLD,OXA1L,NOA1,SDHD,SDHC,COX7C,MUP6,SOD2,UQCC3,CCNB1,CISD1,MUP9,NDUFC2,COX4I1
regulation of DNA-dependent DNA replication	GO:0090329	1.40884e-11	10.8511	47	2742	29	21272	RFC2,LIG3,PCNA,RFC5,DBF4,WDR18,STOML2,RFC4,RFC3,TIMELESS,CHTF18,CDT1,TIPIN,CHTF8,DSCC1,POLG2,DONSON,KAT7,BLM,INO80,CDC7,NPM1,CDK2,SENP2,BRCA2,GMNN,ATRX,ZFP830,FBXO5
regulation of protein stability	GO:0031647	1.51197e-11	10.8205	278	2742	85	21272	CDC37,TELO2,CCT7,QRSL1,NAA15,HDAC3,CCT2,KDM8,TCP1,TARDBP,CDK7,MDM4,DNAJA3,PDCL3,RPL5,CCT3,CUL3,CCT4,PFN1,CDC73,PHB,PHB2,CCT5,GTPBP4,SEC16A,RPL11,COG7,GNL3L,EP300,PLK1,USP36,NF2,DDI2,HSPD1,TOMM7,USP7,SWSAP1,AURKA,WDR81,USP8,HYPK,HCFC1,USP9X,GAPDH,CCT8,HSP90AB1,MUL1,CCNH,NPM1,DAD1,HSPA8,DDOST,PRKDC,ZFP207,RPS7,SERF2,SYVN1,MORC3,MDM2,PINX1,ID1,TBL1X,CAML,RPL23,TSC1,GET4,PEX2,MAPK1,DIEXF,SENP2,TRIM24…
protein modification by small protein conjugation	GO:0032446	1.53862e-11	10.8129	787	2742	179	21272	PRPF19,CTU1,UBA1,VHL,PPIL2,FANCL,BRAP,DCAF7,MOCS3,SKP1A,MED20,NEDD8,MED12,RNF40,DCAF13,DDX3X,RBX1,UBE2M,TRAIP,MED7,SDE2,MED10,SPOP,LZTR1,ANAPC1,ANAPC11,UBE2N,ARIH1,RFWD3,DNAJA3,UBA2,DNM1L,RPL5,DDB1,CUL3,SENP6,URM1,HUWE1,CDC16,RPS2,CDC73,KEAP1,TRIM71,ANAPC2,RNF8,KCTD10,UBA52,TRIM28,DET1,CTR9,UBA3,PAF1,MED21,BIRC6,GTPBP4,WAC,CUL4B,PEX12,MASTL,U2AF2,MED30,RBBP6,CDC23,UBE2G2,AURKAIP1,MED18,E4F1,UBE4B…
mitochondrial transport	GO:0006839	1.62107e-11	10.7902	203	2742	69	21272	PNPT1,ATP5A1,SLC25A37,TIMM17A,TIMM10,TIMM50,LETM1,SLC25A28,HSPA4,TOMM22,OPA1,MFN2,DNAJC15,PMPCB,TIMM44,STOML2,PAM16,ATP5H,COX18,ATP5B,STAT3,ATP5C1,GRPEL1,MIPEP,CHCHD4,NDUFA13,AIFM1,ROMO1,ATP5J2,MTCH2,PMPCA,TIMM9,MRPL18,ATP5K,ATP5O,HSPD1,TOMM7,ATP5J,HK2,UQCRC2,ATP5L,MCUR1,SAMM50,TOMM40,ATP5D,TIMM13,TOMM70A,MUL1,CYC1,TIMM8A1,BCL2L1,OXA1L,TIMM22,MTERF4,TOMM20,PARL,AGK,SLC9A1,ATP5E,SLC25A32,SIVA1,DNL…
negative regulation of gene expression	GO:0010629	1.68445e-11	10.7735	2102	2742	389	21272	PNPT1,HIST1H2AE,HIST1H2AN,METTL14,PPP2CA,VHL,KAT8,DR1,TXN1,SKIV2L,L3MBTL2,TYMS,EIF6,HNRNPU,DDX5,POU5F1,NR0B1,MAX,NELFB,UXT,NCBP1,HDAC1,SMARCE1,CLP1,RNF40,CTCF,DDX3X,ZFP281,IGBP1,PFDN5,HDAC3,TRAIP,KDM8,NACA,APEX1,BIRC5,PCID2,MRPL44,SAP130,PELO,QARS,PABPC1,MRTO4,HIST2H3C1,NCBP2,TARDBP,HIST1H3F,PCNA,THAP11,SPOP,DHFR,LSM2,SIN3A,LSM7,HNRNPK,EXOSC10,MDM4,UPF1,XRCC6,RPL10,DNAJA3,RIF1,EXOSC3,SETDB1,SMARC…
ncRNA 3'-end processing	GO:0043628	1.75476e-11	10.7558	36	2742	25	21272	HSD17B10,EXOSC10,DKC1,EXOSC3,INTS8,POLR3K,TUT1,SSB,EXOSC2,PTCD1,EXOSC5,EXOSC8,EXOSC7,INTS5,INTS6,RPS21,TOE1,PARN,ELAC2,TRMT10C,EXOSC4,TRNT1,USB1,FBL,INTS1
histone acetylation	GO:0016573	2.37498e-11	10.6243	160	2742	59	21272	KAT8,DR1,L3MBTL2,CTCF,GTF2B,RUVBL2,SETD5,NCOA3,SIN3A,TADA1,PIH1D1,CHEK1,POLE3,YEATS4,SMARCA4,KAT5,GTF3C4,MEAF6,BRD4,KANSL3,BRPF1,TRRAP,WDR5,EP300,MED24,ACTL6A,MORF4L2,EP400,DMAP1,RUVBL1,SMARCB1,OGT,MCRS1,NAA50,HAT1,DPF2,KAT7,FLCN,HCFC1,BRCA1,TAF7,NAA40,KANSL2,MCM3AP,MSL1,TAF6L,ING3,PAXIP1,IWS1,MBIP,BRCA2,ING5,ING4,USP22,YEATS2,TADA3,TAF5L,SUPT3,TADA2A
negative regulation of biosynthetic process	GO:0009890	2.51925e-11	10.5987	1691	2742	325	21272	HIST1H2AE,HIST1H2AN,METTL14,PPP2CA,CLTC,VHL,KAT8,DR1,TXN1,TYMS,EIF6,HNRNPU,ATP1A1,DDX5,POU5F1,NR0B1,DNAJC2,MAX,NELFB,UXT,HDAC1,SMARCE1,CTCF,DDX3X,ZFP281,RUVBL2,IGBP1,PFDN5,HDAC3,KDM8,NACA,LIG3,BIRC5,TEN1,SAP130,QARS,HIST2H3C1,TARDBP,HIST1H3F,PCNA,THAP11,SPOP,DHFR,SIN3A,HNRNPK,EXOSC10,PARP1,ATR,DDX54,CHEK1,MDM4,UPF1,XRCC6,RPL10,DNAJA3,EEF1A1,RIF1,SETDB1,SMARCA4,BAP1,CNOT3,CNOT10,NACC1,CUL3,NELFCD,…
mitotic spindle organization	GO:0007052	2.71592e-11	10.5661	107	2742	46	21272	CLTC,BCCIP,SBDS,HNRNPU,RACGAP1,BIRC5,RCC1,RAE1,TUBG1,SMC3,DCTN6,KIF11,KIF23,MYBL2,NUMA1,VCP,BORA,TPX2,KPNB1,PLK1,DCTN2,AURKA,AURKB,DYNC1H1,DRG1,CENPH,SMC1A,CDC20,TPR,WDR62,ZFP207,DCTN1,CEP192,NEK2,CHMP1A,NDC80,MZT1,KIF4,NUP62,STAG2,CENPE,POC1A,TACC3,CCNB1,STIL,PCNT
positive regulation of translation	GO:0045727	2.76143e-11	10.5589	131	2742	52	21272	EIF2S3X,EIF6,DDX3X,TRUB2,DHX29,EIF3D,EEF2,MRPS27,EIF3C,RPUSD4,RPL5,RPS4X,UQCC2,HNRNPL,NAT10,RPL30,EIF4G2,DHX36,EIF2B5,RPS9,USP16,EP300,NSUN4,EIF3E,UQCC1,POLR2D,POLR2G,RPL26,CDK4,TRMT10C,POLDIP3,EIF4A3,FASTKD3,NPM1,MPV17L2,ABCF1,DAZL,ELAVL1,MAPK1,LARP4,EIF5A,RPS3A1,CIRBP,KHDRBS1,MTOR,SERP1,PAIP1,SECISBP2,OTUD6B,METTL3,NGRN,RPS6KB1
tRNA wobble base modification	GO:0002097	2.92752e-11	10.5335	22	2742	19	21272	CTU1,ELP5,IKBKAP,ELP3,ELP6,MOCS3,NSUN3,DPH3,TRMU,GTPBP3,ADAT3,MTO1,ELP2,URM1,ELP4,ALKBH1,CTU2,KTI12,ADAT2
protein import into nucleus	GO:0006606	2.95038e-11	10.5301	165	2742	60	21272	ZPR1,PPP2CA,IPO13,IPO7,HDAC3,MBTPS1,TNPO3,NUP85,TARDBP,POLA2,NXT1,RBM22,NUP88,RAN,SNUPN,STAT3,HEATR3,TRIM28,ECT2,PHB2,NUTF2,IPO4,CDK1,NUP50,PIK3R2,KPNB1,EP300,KPNA2,NUP93,NUP107,NF1,DMAP1,NUP214,NOLC1,CSE1L,NUPL1,ING1,IPO5,BRCA1,HSP90AB1,NUP153,TPR,HSPA8,TNPO1,NUP155,CDH1,PRKCD,ELAVL1,MAPK1,NUP62,UBR5,NUP133,KPNA1,IPO11,IPO9,MAPK14,RPAIN,KPNA6,NUP54,NUP98
negative regulation of cellular biosynthetic process	GO:0031327	2.95303e-11	10.5297	1648	2742	318	21272	HIST1H2AE,HIST1H2AN,METTL14,PPP2CA,CLTC,VHL,KAT8,DR1,TXN1,TYMS,EIF6,HNRNPU,ATP1A1,DDX5,POU5F1,NR0B1,DNAJC2,MAX,NELFB,UXT,HDAC1,SMARCE1,CTCF,DDX3X,ZFP281,RUVBL2,IGBP1,PFDN5,HDAC3,KDM8,NACA,LIG3,BIRC5,TEN1,SAP130,QARS,HIST2H3C1,TARDBP,HIST1H3F,PCNA,THAP11,SPOP,DHFR,SIN3A,HNRNPK,EXOSC10,PARP1,ATR,DDX54,CHEK1,MDM4,UPF1,XRCC6,RPL10,DNAJA3,RIF1,SETDB1,SMARCA4,BAP1,CNOT3,CNOT10,NACC1,CUL3,NELFCD,KAT5,FA…
RNA phosphodiester bond hydrolysis, endonucleolytic	GO:0090502	3.02442e-11	10.5194	74	2742	37	21272	CPSF3,FEN1,DBR1,APEX1,MRPL44,BOP1,POP4,RNASEH2A,RRS1,RNASEH2B,RPP38,RPP30,ABT1,RPP21,BMS1,RPP14,DROSHA,UTP23,RPS21,POP5,YBEY,POP7,ELAC2,POP1,TSEN2,DICER1,FCF1,NPM1,RNASEK,RCL1,SND1,RNASEH1,TSEN34,TSR1,DGCR8,NOB1,RNASET2A
negative regulation of RNA metabolic process	GO:0051253	3.69534e-11	10.4323	1447	2742	286	21272	HIST1H2AE,HIST1H2AN,PPP2CA,VHL,KAT8,DR1,TXN1,HNRNPU,DDX5,POU5F1,NR0B1,MAX,NELFB,UXT,HDAC1,LRPPRC,SMARCE1,RNF40,CTCF,ZFP281,RUVBL2,IGBP1,PFDN5,HDAC3,KDM8,NACA,BIRC5,SAP130,QARS,PABPC1,HIST2H3C1,TARDBP,HIST1H3F,PCNA,THAP11,SPOP,ABCE1,SIN3A,HNRNPK,DDX54,MDM4,XRCC6,RPL10,DKC1,DNAJA3,RIF1,SETDB1,SMARCA4,BAP1,NACC1,SFSWAP,CUL3,NELFCD,KAT5,FAM208A,PSMC5,ILF3,NANOG,TFCP2L1,ZC3H10,CDC73,RNF8,PHB,DNMT1,HIN…
modification-dependent protein catabolic process	GO:0019941	3.70845e-11	10.4308	605	2742	146	21272	UBA1,COPS3,SKP1A,PSMD14,NEDD8,SMARCC1,RNF40,VPS25,RBX1,PSMB6,SNF8,SPOP,ANAPC1,ANAPC11,UBE2N,ARIH1,PSMA1,PSMD2,PDCL3,PSMA6,BAP1,PSMA5,RPL5,DDB1,CUL3,KAT5,PSMC5,HUWE1,CDC16,KEAP1,PSMD4,TRIM71,ANAPC2,RNF8,KCTD10,UBA52,PSMD3,PSMB1,PSMC6,DET1,PSMD6,CSNK1A1,FAF2,BIRC6,WAC,CUL4B,PSMA3,USP37,RBBP6,UBE2G2,USP10,PTPN23,UBE4B,RPL11,SUMO2,PSMB4,VCP,PSMB7,USP16,UHRF1,PLK1,USP36,XPO1,UBE2K,UBE2C,RNF20,PSMD1,US…
regulation of chromatin organization	GO:1902275	3.7274e-11	10.4286	206	2742	69	21272	L3MBTL2,HNRNPU,POU5F1,RNF40,CTCF,RUVBL2,SETD5,SIN3A,UBE2N,PIH1D1,CHEK1,RIF1,SETDB1,FAM208A,DNMT1,TRIM28,CTR9,PAF1,BRD4,KMT2B,FH1,ZFP335,WDR5,RTF1,EP300,NELFA,CDK9,JARID2,MPHOSPH8,RNF20,ATM,MTF2,SMARCB1,OGT,KAT7,FLCN,OTUB1,BRCA1,KDM1A,WDR61,TPR,TAF7,NAA40,NELFE,NIPBL,EHMT2,EED,SETD1A,PHF8,CDC45,SART3,PAXIP1,IWS1,BCOR,ATAD2,UBR5,MORC2A,SUPT6,ATF7IP,ATRX,SSRP1,TADA3,PARG,NSD1,HIRA,CCNB1,TADA2A,MKI67…
negative regulation of organelle organization	GO:0010639	4.1734e-11	10.3795	415	2742	111	21272	L3MBTL2,RTEL1,HNRNPU,XRCC3,NUBP1,TRIAP1,ZW10,OPA1,MCM2,BIRC5,TEN1,PCID2,MFN1,TBCD,ERCC4,ARPC2,TOP2A,SIN3A,EXOSC10,PIH1D1,CHEK1,BUB3,DNM1L,FXN,PAM16,PFN1,MNAT1,DNMT1,RAD1,NAT10,TINF2,MAPRE1,FH1,CAPZB,CDT1,WDR5,SCFD1,PRELID1,TPX2,GNL3L,PRKAR1A,PLK1,JARID2,ATM,MTF2,SMARCB1,PSMG2,SPDL1,AURKB,MCRS1,HNRNPA1,CAMSAP3,NBN,FLCN,HNRNPC,OTUB1,PHF23,BECN1,BRCA1,NAA10,DLC1,MUL1,TERF1,KDM1A,TPR,TAF7,USP30,DNM2,…
establishment of protein localization	GO:0045184	4.34227e-11	10.3623	1918	2742	359	21272	NSF,VPS29,ZPR1,GOLT1B,PPP2CA,CLTC,VHL,IPO13,CHMP6,THOC3,TXN1,EXOC7,EIF6,HNRNPU,TIMM17A,TIMM10,TIMM50,PABPN1,NUP43,YKT6,IPO7,HSPA4,TFRC,NCBP1,HDAC1,SRP72,CCT7,DPH3,TOMM22,VPS25,RUVBL2,ACTR3,HSPA9,ZW10,ARF1,HDAC3,CCT2,MFN2,TCP1,MTX2,MBTPS1,NACA,BIRC5,PCID2,TNPO3,NAPA,NUP85,GPI1,SNF8,TARDBP,POLA2,GOSR2,ARPC2,ABCE1,NXT1,ACSL4,RBM22,DNAJC15,PIH1D1,RAE1,NUP88,DKC1,COG4,RAN,SEC61A1,DNM1L,ARFRP1,SRP19,PH…
negative regulation of nitrogen compound metabolic process	GO:0051172	4.48403e-11	10.3483	2508	2742	448	21272	HIST1H2AE,HIST1H2AN,METTL14,PPP2CA,CLTC,VHL,CHMP6,KAT8,DR1,TXN1,L3MBTL2,TYMS,EIF6,RTEL1,HNRNPU,G6PDX,DDX5,POU5F1,NR0B1,DNAJC2,MAX,NELFB,UXT,HDAC1,LRPPRC,SMARCC1,TRIAP1,SMARCE1,RNF40,CTCF,VPS25,DDX3X,ZFP281,RUVBL2,IGBP1,PFDN5,HDAC3,KDM8,ACTB,NACA,BIRC5,TEN1,PCID2,SAP130,QARS,PABPC1,GPI1,HIST2H3C1,ERCC4,TARDBP,EIF3A,HIST1H3F,PCNA,THAP11,SPOP,DHFR,ABCE1,SIN3A,HNRNPK,EXOSC10,PARP1,DDX54,PIH1D1,CHEK1,…
regulation of response to DNA damage stimulus	GO:2001020	5.98402e-11	10.223	217	2742	71	21272	RAD9A,RTEL1,DDX5,TRIAP1,PPP4C,RAD51,ACTR2,ERCC4,TPT1,PCNA,MMS19,HNRNPK,PARP1,UBE2N,ATR,CHEK1,RFWD3,RIF1,CCDC94,RNASEH2B,SMG1,THOC1,RNF8,TRIM28,FIGNL1,DDX11,BCLAF1,MYC,TIMELESS,FH1,MTCH2,NSMCE1,RPS3,CDK9,SETD2,ATM,HMGB1,RPL26,RPA2,NSMCE4A,THOC5,KAT7,PNKP,OTUB1,PIAS4,BLM,BRCA1,POLQ,KDM1A,WRAP53,BABAM1,NPM1,RMI2,EEF1E1,USP1,FUS,PRKDC,BCL2L1,MDM2,DYRK1A,PAXIP1,PRKCD,PPP1R10,XRCC1,UBR5,ARID2,FBXO5,PAR…
intracellular protein transmembrane transport	GO:0065002	6.28068e-11	10.202	52	2742	30	21272	TIMM17A,TIMM50,DNAJC15,SEC61A1,TIMM44,PAM16,GRPEL1,PEX12,CHCHD4,AIFM1,ROMO1,PEX10,HSPD1,TOMM7,SEC63,PEX5,TOMM40,SEC61B,SRP54B,SRP54A,AKT2,PEX13,PEX2,PEX1,TOMM20,PEX7,HSPA5,PEX6,DNLZ,PEX16
negative regulation of mitotic sister chromatid segregation	GO:0033048	6.54478e-11	10.1841	43	2742	27	21272	XRCC3,ZW10,BIRC5,PCID2,BUB3,CDT1,PLK1,ATM,PSMG2,SPDL1,AURKB,NAA10,TPR,MAD2L1,MAD1L1,TRIP13,ZFP207,CEP192,MAD2L1BP,NDC80,IK,TTK,RAD21,ATRX,FBXO5,APC,CCNB1
microtubule-based process	GO:0007017	7.51822e-11	10.1239	794	2742	178	21272	PPP2R1A,ZPR1,CLTC,BCCIP,WDR73,SBDS,HNRNPU,XRCC3,HAUS4,UXT,NUBP1,RACGAP1,CENPA,PPP2R3C,ACTR3,IGBP1,ZW10,HDAC3,TUBB5,BIRC5,RCC1,ACTR2,TBCD,KIF2C,DNAAF5,CHEK1,RAE1,TUBG1,DYNLRB1,SMC3,INCENP,DYNC1I2,SENP6,SRRD,KIF18A,DCTN6,SMN1,KIF20B,SKA2,VBP1,TUBGCP5,STARD7,HAUS7,E2F4,FIGNL1,MAPRE1,KIF11,KIF23,MYBL2,CFAP20,CENPW,HAUS3,TUBA1A,NUMA1,VCP,TUBA1C,RPS3,RANBP1,BORA,TPX2,CHMP3,KPNB1,PLK1,BLOC1S1,TUBGCP4,XP…
internal protein amino acid acetylation	GO:0006475	7.53259e-11	10.1231	168	2742	60	21272	KAT8,DR1,L3MBTL2,CTCF,GTF2B,RUVBL2,SETD5,NCOA3,SIN3A,TADA1,PIH1D1,CHEK1,POLE3,YEATS4,SMARCA4,KAT5,GTF3C4,MEAF6,BRD4,KANSL3,BRPF1,TRRAP,WDR5,EP300,MED24,ACTL6A,MORF4L2,EP400,DMAP1,RUVBL1,SMARCB1,OGT,MCRS1,MDH2,NAA50,HAT1,DPF2,KAT7,FLCN,HCFC1,BRCA1,TAF7,NAA40,KANSL2,MCM3AP,MSL1,TAF6L,ING3,PAXIP1,IWS1,MBIP,BRCA2,ING5,ING4,USP22,YEATS2,TADA3,TAF5L,SUPT3,TADA2A
positive regulation of cell cycle phase transition	GO:1901989	8.24941e-11	10.0836	98	2742	43	21272	DDX3X,APEX1,BIRC5,LSM11,DBF4,ANAPC11,SIN3A,LSM10,CUL3,CDC16,CDC73,PHB2,PAF1,BRD4,CUL4B,CDT1,CDK1,RPTOR,UBE2C,RAD51C,ANP32B,CDC27,ANKRD17,NSMCE2,CDK4,TFDP1,CDC7,EZH2,ANAPC4,NPM1,MTBP,MDM2,CDC45,CCNE1,RAD51B,CDCA5,FBXO5,CCND3,MEPCE,CCNB1,ANAPC5,CDC25A,ATAD5
regulation of telomere maintenance via telomerase	GO:0032210	1.11037e-10	9.95453	56	2742	31	21272	HNRNPU,CCT7,CCT2,TCP1,TEN1,EXOSC10,DKC1,CCT3,CCT4,NAT10,TINF2,CCT5,GNL3L,ATM,PARN,AURKB,HNRNPA1,HNRNPC,PNKP,CCT8,TERF1,XRCC5,PINX1,NEK2,SMG7,SMG5,CTC1,MAPK1,DCP2,TERF2,ACD
positive regulation of RNA biosynthetic process	GO:1902680	1.14801e-10	9.94005	1581	2742	305	21272	ZPR1,VHL,KAT8,DR1,HNRNPU,SCAP,POU5F1,DNAJC2,MAX,MED20,HDAC1,DHX33,MED12,SMARCC1,TRIAP1,CTCF,GTF2B,DDX3X,ZFP281,RUVBL2,ACTR3,IGBP1,MRPL12,NAA15,HDAC3,EAF1,KDM8,NACA,APEX1,PCID2,SOX2,ELL,NUP85,MED10,ACTR2,NCOA3,CDK7,JMJD6,TOP2A,ILF2,SIN3A,MMS19,TADA1,ERCC2,HNRNPK,PARP1,UTP15,PIH1D1,CHEK1,XRCC6,PRDM10,PWP1,SMARCA4,CXXC1,RPRD1B,PRPF6,WDR77,SLC30A9,RBPMS,GTF2F1,KAT5,PSMC5,WDR75,ILF3,NANOG,PFN1,KARS,TH…
internal peptidyl-lysine acetylation	GO:0018393	1.15697e-10	9.93668	165	2742	59	21272	KAT8,DR1,L3MBTL2,CTCF,GTF2B,RUVBL2,SETD5,NCOA3,SIN3A,TADA1,PIH1D1,CHEK1,POLE3,YEATS4,SMARCA4,KAT5,GTF3C4,MEAF6,BRD4,KANSL3,BRPF1,TRRAP,WDR5,EP300,MED24,ACTL6A,MORF4L2,EP400,DMAP1,RUVBL1,SMARCB1,OGT,MCRS1,NAA50,HAT1,DPF2,KAT7,FLCN,HCFC1,BRCA1,TAF7,NAA40,KANSL2,MCM3AP,MSL1,TAF6L,ING3,PAXIP1,IWS1,MBIP,BRCA2,ING5,ING4,USP22,YEATS2,TADA3,TAF5L,SUPT3,TADA2A
negative regulation of cell cycle	GO:0045786	1.25323e-10	9.90197	448	2742	116	21272	PNPT1,PRPF19,RAD9A,XRCC3,STK11,MRE11A,NUBP1,ZW10,BIRC5,PCID2,SOX2,SDE2,INTS3,TOP2A,ATR,CHEK1,BUB3,MDM4,NLE1,RFWD3,TIPRL,RNASEH2B,DNA2,KNTC1,THOC1,CDC73,RAD1,HINFP,MYBBP1A,CDC5L,WAC,MYC,TIMELESS,DCLRE1B,HUS1,CDT1,CDK1,RPL24,TIPIN,TOPBP1,PRKAR1A,PLK1,CDK9,RPS6,ATM,DONSON,PSMG2,SPDL1,AURKB,ATRIP,TAF6,RPL26,RPA2,THOC5,FANCD2,NBN,CDK4,RAD17,BLM,BRCA1,HSP90AB1,NAA10,MCPH1,ZFP36L1,TSG101,EZH2,INTS7,ORC1…
macromolecule localization	GO:0033036	1.29148e-10	9.88891	3027	2742	522	21272	PNPT1,PRPF19,NSF,VPS29,ZPR1,GOLT1B,PPP2CA,CLTC,VHL,IPO13,CHMP6,THOC3,PPIL2,TXN1,MIOS,EXOC7,EIF6,HNRNPU,TIMM17A,TIMM10,TIMM50,PABPN1,NUP43,LAMTOR4,NR0B1,STK11,SKP1A,YKT6,IPO7,HSPA4,TFRC,PITPNB,NCBP1,NUBP1,HDAC1,LRPPRC,NEDD8,SRP72,TRIAP1,CENPA,CCT7,DPH3,CTCF,TOMM22,VPS25,DDX3X,RUVBL2,ACTR3,HSPA9,ZW10,ARF1,HDAC3,CCT2,MFN2,TCP1,MTX2,MBTPS1,ACTB,NACA,BIRC5,PCID2,TNPO3,NAPA,NUP85,GPI1,NCBP2,SNF8,TARDBP…
negative regulation of sister chromatid segregation	GO:0033046	1.48569e-10	9.82807	44	2742	27	21272	XRCC3,ZW10,BIRC5,PCID2,BUB3,CDT1,PLK1,ATM,PSMG2,SPDL1,AURKB,NAA10,TPR,MAD2L1,MAD1L1,TRIP13,ZFP207,CEP192,MAD2L1BP,NDC80,IK,TTK,RAD21,ATRX,FBXO5,APC,CCNB1
mitochondrial RNA metabolic process	GO:0000959	1.48569e-10	9.82807	44	2742	27	21272	HSD17B10,PNPT1,SARS2,POLRMT,TEFM,LRPPRC,AARS2,MRPL12,AARS,FASTKD1,TRMT5,SUPV3L1,GARS,DARS2,TFB2M,MTERF3,ELAC2,WARS2,PDE12,TRMT10C,SLIRP,TRNT1,FASTKD5,YARS2,MTERF4,TFAM,KIF22
peptidyl-lysine acetylation	GO:0018394	1.63123e-10	9.78749	175	2742	61	21272	KAT8,DR1,L3MBTL2,HDAC1,CTCF,GTF2B,RUVBL2,SETD5,NCOA3,SIN3A,TADA1,PIH1D1,CHEK1,POLE3,YEATS4,SMARCA4,KAT5,GTF3C4,MEAF6,BRD4,KANSL3,BRPF1,TRRAP,WDR5,EP300,MED24,ACTL6A,BLOC1S1,MORF4L2,EP400,DMAP1,RUVBL1,SMARCB1,OGT,MCRS1,NAA50,HAT1,DPF2,KAT7,FLCN,HCFC1,BRCA1,TAF7,NAA40,KANSL2,MCM3AP,MSL1,TAF6L,ING3,PAXIP1,IWS1,MBIP,BRCA2,ING5,ING4,USP22,YEATS2,TADA3,TAF5L,SUPT3,TADA2A
aromatic compound catabolic process	GO:0019439	1.78416e-10	9.74857	418	2742	110	21272	PNPT1,METTL14,ZPR1,FEN1,SKIV2L,DDX49,HNRNPU,DUT,DDX5,NCBP1,ITPA,LRPPRC,APEX1,PCID2,PELO,PABPC1,MRTO4,NCBP2,TARDBP,LSM2,RNASEH2A,LSM7,EXOSC10,UPF1,DKC1,DIS3,EXOSC3,CNOT3,CNOT10,RNASEH2B,FASTKD1,MAGOH,PAM16,DNA2,SMG1,TRIM71,SSB,EXOSC2,AHCY,SUPV3L1,RNASEH2C,DHX36,AIFM1,LSM6,MTPAP,EXOSC5,VCP,ETF1,EXOSC8,SKIV2L2,EXOSC7,MGAT1,CNOT8,DROSHA,METTL16,EIF3E,PRPF18,ATM,PARN,POLR2D,YBX1,PDE12,POLR2G,POP1,LSM5…
positive regulation of nucleic acid-templated transcription	GO:1903508	1.79803e-10	9.7452	1580	2742	304	21272	ZPR1,VHL,KAT8,DR1,HNRNPU,SCAP,POU5F1,DNAJC2,MAX,MED20,HDAC1,DHX33,MED12,SMARCC1,TRIAP1,CTCF,GTF2B,DDX3X,ZFP281,RUVBL2,ACTR3,IGBP1,MRPL12,NAA15,HDAC3,EAF1,KDM8,NACA,APEX1,PCID2,SOX2,ELL,NUP85,MED10,ACTR2,NCOA3,CDK7,JMJD6,TOP2A,ILF2,SIN3A,MMS19,TADA1,ERCC2,HNRNPK,PARP1,UTP15,PIH1D1,CHEK1,XRCC6,PRDM10,PWP1,SMARCA4,CXXC1,RPRD1B,PRPF6,WDR77,SLC30A9,RBPMS,GTF2F1,KAT5,PSMC5,WDR75,ILF3,NANOG,PFN1,KARS,TH…
snRNA metabolic process	GO:0016073	1.89028e-10	9.72347	33	2742	23	21272	INTS3,EXOSC10,DKC1,EXOSC3,INTS8,TUT1,EXOSC2,INTS4,EXOSC5,EXOSC8,EXOSC7,INTS5,NHP2,INTS6,METTL16,INTS9,TOE1,EXOSC4,NOP10,INTS7,USB1,MEPCE,INTS1
cleavage involved in rRNA processing	GO:0000469	1.97476e-10	9.70449	21	2742	18	21272	BOP1,EXOSC10,EXOSC3,RRS1,EXOSC2,ABT1,BMS1,EXOSC8,EXOSC7,UTP23,NHP2,RRP36,RPS21,FCF1,NPM1,RCL1,TSR1,NOB1
negative regulation of mitotic metaphase/anaphase transition	GO:0045841	2.97481e-10	9.52654	39	2742	25	21272	XRCC3,ZW10,BIRC5,PCID2,BUB3,CDT1,PLK1,ATM,PSMG2,SPDL1,AURKB,TPR,MAD2L1,MAD1L1,TRIP13,ZFP207,CEP192,MAD2L1BP,NDC80,IK,TTK,RAD21,FBXO5,APC,CCNB1
positive regulation of mitotic cell cycle phase transition	GO:1901992	2.98429e-10	9.52516	82	2742	38	21272	DDX3X,APEX1,BIRC5,LSM11,DBF4,ANAPC11,SIN3A,LSM10,CUL3,CDC16,PHB2,BRD4,CUL4B,CDT1,CDK1,RPTOR,UBE2C,RAD51C,ANP32B,CDC27,ANKRD17,NSMCE2,CDK4,TFDP1,CDC7,ANAPC4,MTBP,MDM2,CDC45,CCNE1,RAD51B,CDCA5,FBXO5,CCND3,MEPCE,CCNB1,ANAPC5,CDC25A
negative regulation of chromosome segregation	GO:0051985	3.25767e-10	9.48709	45	2742	27	21272	XRCC3,ZW10,BIRC5,PCID2,BUB3,CDT1,PLK1,ATM,PSMG2,SPDL1,AURKB,NAA10,TPR,MAD2L1,MAD1L1,TRIP13,ZFP207,CEP192,MAD2L1BP,NDC80,IK,TTK,RAD21,ATRX,FBXO5,APC,CCNB1
in utero embryonic development	GO:0001701	3.52711e-10	9.45258	487	2742	122	21272	PRPF19,ZPR1,SCO2,SBDS,PRMT1,POU5F1,RTCB,COPS3,PITPNB,NDUFA2,CMIP,MFN2,ELL,PELO,GPI1,KIDINS220,SRSF1,SIN3A,ERCC2,CHEK1,NLE1,EMG1,SMARCA4,LIG4,CNOT3,BTF3,RNASEH2B,RRP7A,CUL3,KEAP1,HINFP,NCAPG2,TRIM28,TAF8,CTR9,GRB2,MED21,BRD4,BIRC6,PSMC4,MYC,RPA1,RBBP6,CHD8,ZFP335,SUDS3,EIF4E2,RTF1,RPL7L1,PRDM14,ANKRD11,MGAT1,ACTL6A,DHX35,SETD2,BPTF,PBRM1,POLG2,AMD1,SMARCB1,SSR2,YBX1,ZFAT,SP1,RBPJ,XRCC2,PSMC3,RBBP8…
ubiquitin-dependent protein catabolic process	GO:0006511	3.62105e-10	9.44117	593	2742	141	21272	UBA1,COPS3,SKP1A,PSMD14,SMARCC1,RNF40,VPS25,RBX1,PSMB6,SNF8,SPOP,ANAPC1,ANAPC11,UBE2N,ARIH1,PSMA1,PSMD2,PDCL3,PSMA6,BAP1,PSMA5,RPL5,DDB1,CUL3,KAT5,PSMC5,HUWE1,CDC16,KEAP1,PSMD4,TRIM71,ANAPC2,RNF8,KCTD10,PSMD3,PSMB1,PSMC6,DET1,PSMD6,CSNK1A1,FAF2,BIRC6,WAC,CUL4B,PSMA3,USP37,RBBP6,UBE2G2,USP10,PTPN23,UBE4B,RPL11,SUMO2,PSMB4,VCP,PSMB7,USP16,UHRF1,PLK1,USP36,XPO1,UBE2K,UBE2C,RNF20,PSMD1,USP7,AURKA,GLM…
regulation of RNA biosynthetic process	GO:2001141	4.03998e-10	9.39362	3371	2742	569	21272	HIST1H2AE,HIST1H2AN,ZPR1,PPP2CA,VHL,KAT8,DR1,TXN1,L3MBTL2,ELP3,HNRNPU,SCAP,DDX5,POU5F1,NR0B1,DNAJC2,MAX,NELFB,MED26,TFRC,MED20,UXT,HDAC1,DHX33,NEDD8,MED12,SMARCC1,TRIAP1,FANCA,SMARCE1,CTCF,GTF2B,DDX3X,VPS72,ZFP281,RUVBL2,ACTR3,IGBP1,CIAO1,MRPL12,PFDN5,NAA15,HDAC3,TRAIP,EAF1,KDM8,NACA,APEX1,BIRC5,SETD5,PCID2,MED7,SOX2,ELL,SAP130,QARS,NUP85,MED10,HIST2H3C1,ACTR2,SNF8,SSU72,HIST1H3F,NCOA3,PCNA,CDK7,…
protein acylation	GO:0043543	4.50855e-10	9.34596	249	2742	76	21272	KAT8,DR1,L3MBTL2,HDAC1,CTCF,GTF2B,DDX3X,RUVBL2,DLST,NAA15,SETD5,NCOA3,SIN3A,TADA1,PIH1D1,CHEK1,POLE3,YEATS4,SMARCA4,KAT5,OGDH,GTF3C4,MEAF6,BRD4,KANSL3,BRPF1,TRRAP,WDR5,NAA35,NAA20,EP300,MED24,ACTL6A,BLOC1S1,MORF4L2,EP400,DMAP1,DSCC1,RUVBL1,ESCO2,SMARCB1,OGT,MCRS1,MDH2,NAA50,HAT1,DPF2,KAT7,FLCN,HCFC1,BRCA1,NAA10,NAA25,TAF7,NAA40,KANSL2,MCM3AP,MSL1,DLD,TAF6L,ING3,PAXIP1,IWS1,MBIP,BRCA2,ING5,ING4,NA…
histone H4 acetylation	GO:0043967	4.61753e-10	9.33559	72	2742	35	21272	KAT8,RUVBL2,PIH1D1,YEATS4,KAT5,MEAF6,BRD4,KANSL3,TRRAP,WDR5,EP300,ACTL6A,MORF4L2,EP400,DMAP1,RUVBL1,SMARCB1,OGT,MCRS1,NAA50,HAT1,KAT7,HCFC1,BRCA1,TAF7,NAA40,KANSL2,MSL1,ING3,IWS1,BRCA2,ING5,ING4,USP22,TADA3
regulation of nucleic acid-templated transcription	GO:1903506	4.76781e-10	9.32168	3367	2742	568	21272	HIST1H2AE,HIST1H2AN,ZPR1,PPP2CA,VHL,KAT8,DR1,TXN1,L3MBTL2,ELP3,HNRNPU,SCAP,DDX5,POU5F1,NR0B1,DNAJC2,MAX,NELFB,MED26,TFRC,MED20,UXT,HDAC1,DHX33,NEDD8,MED12,SMARCC1,TRIAP1,FANCA,SMARCE1,CTCF,GTF2B,DDX3X,VPS72,ZFP281,RUVBL2,ACTR3,IGBP1,CIAO1,MRPL12,PFDN5,NAA15,HDAC3,TRAIP,EAF1,KDM8,NACA,APEX1,BIRC5,SETD5,PCID2,MED7,SOX2,ELL,SAP130,QARS,NUP85,MED10,HIST2H3C1,ACTR2,SNF8,SSU72,HIST1H3F,NCOA3,PCNA,CDK7,…
negative regulation of mitotic nuclear division	GO:0045839	5.6406e-10	9.24868	52	2742	29	21272	XRCC3,ZW10,BIRC5,PCID2,CHEK1,BUB3,CDT1,PLK1,ATM,PSMG2,SPDL1,AURKB,NAA10,TPR,MAD2L1,MAD1L1,MTBP,TRIP13,ZFP207,CEP192,MAD2L1BP,NDC80,IK,TTK,RAD21,ATRX,FBXO5,APC,CCNB1
iron-sulfur cluster assembly	GO:0016226	6.2346e-10	9.20519	24	2742	19	21272	NDOR1,NUBP2,NUBPL,FAM96B,HSCB,ISCA2,ISCA1,NUBP1,ISCU,GLRX3,NFS1,HSPA9,CIAO1,MMS19,NARFL,IBA57,FXN,NFU1,LYRM4
metallo-sulfur cluster assembly	GO:0031163	6.2346e-10	9.20519	24	2742	19	21272	NDOR1,NUBP2,NUBPL,FAM96B,HSCB,ISCA2,ISCA1,NUBP1,ISCU,GLRX3,NFS1,HSPA9,CIAO1,MMS19,NARFL,IBA57,FXN,NFU1,LYRM4
regulation of DNA-templated transcription, elongation	GO:0032784	6.37296e-10	9.19566	49	2742	28	21272	HNRNPU,SETD5,ELL,GTF2F1,NELFCD,THOC1,CDC73,RNF8,CTR9,PAF1,BRD4,SUPT5,RTF1,WDR43,NELFA,CDK9,EAPP,THOC5,KAT7,WDR61,EZH2,NELFE,SUPT4A,GTF2F2,SUPT6,CCNT2,RNF168,CCNT1
ncRNA transcription	GO:0098781	6.91769e-10	9.16004	46	2742	27	21272	GTF3C1,ELL,SNAPC1,PIH1D1,PWP1,SMARCA4,SNAPC5,DDX11,POLR1B,SNAPC4,RPAP2,POLR2L,SMARCB1,MARS,NCL,ICE2,CD3EAP,POLR1A,NPM1,USPL1,ZC3H8,TOP1,TAF1B,SPIN1,ICE1,MTOR,POLR1E
negative regulation of metaphase/anaphase transition of cell cycle	GO:1902100	6.95982e-10	9.1574	40	2742	25	21272	XRCC3,ZW10,BIRC5,PCID2,BUB3,CDT1,PLK1,ATM,PSMG2,SPDL1,AURKB,TPR,MAD2L1,MAD1L1,TRIP13,ZFP207,CEP192,MAD2L1BP,NDC80,IK,TTK,RAD21,FBXO5,APC,CCNB1
negative regulation of mitotic sister chromatid separation	GO:2000816	6.95982e-10	9.1574	40	2742	25	21272	XRCC3,ZW10,BIRC5,PCID2,BUB3,CDT1,PLK1,ATM,PSMG2,SPDL1,AURKB,TPR,MAD2L1,MAD1L1,TRIP13,ZFP207,CEP192,MAD2L1BP,NDC80,IK,TTK,RAD21,FBXO5,APC,CCNB1
respiratory electron transport chain	GO:0022904	7.71805e-10	9.11249	84	2742	38	21272	SCO2,NDUFA8,NDUFS2,ISCU,UQCRC1,SDHA,NDUFB9,DNAJC15,NDUFS8,NDUFS1,MYBBP1A,NDUFB8,SDHB,AIFM1,MTCH2,CDK1,NDUFB6,CYCS,UQCRB,NDUFV2,UQCRFS1,UQCR10,NDUFA5,POLG2,NDUFA10,COA6,UQCRQ,CYC1,ETFDH,DLD,SDHD,SDHC,COX7C,SOD2,UQCC3,CCNB1,NDUFC2,COX4I1
DNA integrity checkpoint	GO:0031570	9.66661e-10	9.01473	116	2742	46	21272	PRPF19,RAD9A,MRE11A,TOP2A,ATR,CHEK1,RFWD3,TIPRL,RNASEH2B,DNA2,THOC1,RAD1,HINFP,CDC5L,WAC,TIMELESS,HUS1,CDT1,CDK1,TIPIN,TOPBP1,PLK1,ATM,DONSON,ATRIP,RPL26,RPA2,THOC5,FANCD2,NBN,RAD17,BLM,BRCA1,INTS7,ORC1,BABAM1,PTPN11,PRKDC,GIGYF2,MDM2,PPP1R10,MSH2,ZFP830,MAPK14,CCNG1,NAE1
establishment of protein localization to mitochondrion	GO:0072655	9.73906e-10	9.01148	96	2742	41	21272	TIMM17A,TIMM10,TIMM50,HSPA4,TOMM22,MFN2,DNAJC15,PMPCB,TIMM44,PAM16,COX18,GRPEL1,MIPEP,CHCHD4,NDUFA13,AIFM1,ROMO1,MTCH2,PMPCA,TIMM9,HSPD1,TOMM7,HK2,UQCRC2,SAMM50,TOMM40,TIMM13,TOMM70A,TIMM8A1,OXA1L,DNAJA1,TIMM22,MTERF4,TOMM20,PARL,AP3B1,AGK,DNLZ,FBXW7,MFF,PDCD5
negative regulation of mitotic cell cycle	GO:0045930	9.85912e-10	9.00616	233	2742	72	21272	PNPT1,RAD9A,XRCC3,MRE11A,ZW10,BIRC5,PCID2,INTS3,TOP2A,CHEK1,BUB3,NLE1,RFWD3,KNTC1,CDC73,DCLRE1B,HUS1,CDT1,CDK1,RPL24,TIPIN,TOPBP1,PLK1,RPS6,ATM,DONSON,PSMG2,SPDL1,AURKB,RPL26,RPA2,FANCD2,NBN,RAD17,BLM,BRCA1,NAA10,MCPH1,ZFP36L1,EZH2,ORC1,TPR,ZWILCH,MAD2L1,MAD1L1,ZWINT,MTBP,TRIP13,PRKDC,BCL2L1,GIGYF2,ZFP207,CEP192,MDM2,PINX1,MAD2L1BP,GADD45GIP1,NDC80,IK,PPP1R10,MSH2,TTK,RAD21,WEE1,ATRX,ZFP830,FBXO5…
organelle localization	GO:0051640	1.06764e-09	8.97157	522	2742	127	21272	NSF,BCCIP,CHMP6,CLUH,EIF6,HNRNPU,STK11,YKT6,NUBP1,CENPA,ACTR3,ZW10,ARF1,OPA1,MFN2,BIRC5,ACTR2,MFN1,KIF2C,ABCE1,NUP88,RAN,DNM1L,VPS11,INCENP,RRS1,ARCN1,CUL3,LAMTOR1,SDAD1,KIF18A,MIS12,RAB7,LSG1,KIF23,CDC23,SEC16A,CDT1,VPS33A,SNAP23,NUMA1,NMD3,SCFD1,NUDC,KPNB1,PLK1,BLOC1S1,MSTO1,XPO1,ARL8B,CHAMP1,PREB,DCTN2,DYNLT1F,ATM,AURKA,VPS18,SPDL1,USO1,AURKB,OGT,DYNC1H1,DYNLT1B,FLCN,RPS15,BECN1,MCPH1,COPG1,GB…
alternative mRNA splicing, via spliceosome	GO:0000380	1.08901e-09	8.96297	81	2742	37	21272	HNRNPU,DDX5,SRSF1,SRSF3,SFSWAP,MAGOH,ZC3H10,SRSF5,SRSF7,HNRNPL,PTBP1,SMU1,TRA2B,RBM25,WTAP,RBM17,HNRNPA1,KDM1A,EIF4A3,SRSF10,RBM8A,SLU7,SCNM1,DYRK1A,RBFOX2,SRSF2,SART3,IK,RBM15,PQBP1,RBM19,THRAP3,KHDRBS1,RNPS1,SRSF6,DDX17,RBM10
regulation of nucleocytoplasmic transport	GO:0046822	1.15969e-09	8.93566	129	2742	49	21272	ZPR1,PPP2CA,TXN1,HDAC3,NCBP2,TARDBP,RBM22,RAN,TRIM28,ECT2,CHCHD4,NUTF2,CDK1,PIK3R2,EP300,RANGAP1,XPO1,NF1,SETD2,DMAP1,NUP214,ANP32B,NOLC1,NUPL1,THOC2,IPO5,BRCA1,HSP90AB1,NUP153,BARD1,TPR,NSUN2,PTPN11,PPP1R12A,MDM2,CDH1,PRKCD,IWS1,MAPK1,XPO4,NUP62,UBR5,KHDRBS1,PPP1CC,SUPT6,NRDE2,XPO5,MAPK14,NUP54
protein transmembrane import into intracellular organelle	GO:0044743	1.31261e-09	8.88186	35	2742	23	21272	TIMM17A,TIMM50,DNAJC15,TIMM44,PAM16,GRPEL1,PEX12,CHCHD4,AIFM1,ROMO1,PEX10,HSPD1,TOMM7,PEX5,TOMM40,PEX13,PEX2,PEX1,TOMM20,PEX7,PEX6,DNLZ,PEX16
formation of cytoplasmic translation initiation complex	GO:0001732	1.4608e-09	8.83541	16	2742	15	21272	EIF3F,EIF3K,EIF3D,EIF3A,EIF5,EIF3C,EIF3I,EIF3H,EIF3L,EIF3E,EIF3B,EIF3G,EIF3M,EIF3J1,EIF2S2
negative regulation of chromosome separation	GO:1905819	1.56475e-09	8.80556	41	2742	25	21272	XRCC3,ZW10,BIRC5,PCID2,BUB3,CDT1,PLK1,ATM,PSMG2,SPDL1,AURKB,TPR,MAD2L1,MAD1L1,TRIP13,ZFP207,CEP192,MAD2L1BP,NDC80,IK,TTK,RAD21,FBXO5,APC,CCNB1
protein localization to mitochondrion	GO:0070585	2.24623e-09	8.64854	102	2742	42	21272	TIMM17A,TIMM10,TIMM50,HSPA4,TOMM22,MFN2,DNAJC15,DNM1L,PMPCB,TIMM44,PAM16,COX18,GRPEL1,MIPEP,CHCHD4,NDUFA13,AIFM1,ROMO1,MTCH2,PMPCA,TIMM9,HSPD1,TOMM7,HK2,UQCRC2,SAMM50,TOMM40,TIMM13,TOMM70A,TIMM8A1,OXA1L,DNAJA1,TIMM22,MTERF4,TOMM20,PARL,AP3B1,AGK,DNLZ,FBXW7,MFF,PDCD5
protein methylation	GO:0006479	2.26413e-09	8.6451	189	2742	62	21272	NDUFAF7,WDR82,PRMT5,L3MBTL2,PRMT1,FAM98B,CTCF,SETD5,PIH1D1,PWP1,RIF1,SETDB1,TRMT112,CXXC1,ILF3,DNMT1,CTR9,PAF1,BRD4,KMT2B,FH1,ZFP335,WDR5,RTF1,PRDM14,ETF1,NELFA,JARID2,SETD2,RNF20,N6AMT1,SNRPD3,MTF2,SMARCB1,OGT,BRCA1,KDM1A,WDR61,EZH2,NELFE,SNRPB,EHMT2,EED,SETD1A,GSPT1,FBL,CARM1,RBBP5,PAXIP1,ASH2L,PRMT7,IWS1,BCOR,DPY30,SUPT6,ATRX,EHMT1,SUZ12,KMT2D,ICMT,NSD1,PRMT3
protein alkylation	GO:0008213	2.26413e-09	8.6451	189	2742	62	21272	NDUFAF7,WDR82,PRMT5,L3MBTL2,PRMT1,FAM98B,CTCF,SETD5,PIH1D1,PWP1,RIF1,SETDB1,TRMT112,CXXC1,ILF3,DNMT1,CTR9,PAF1,BRD4,KMT2B,FH1,ZFP335,WDR5,RTF1,PRDM14,ETF1,NELFA,JARID2,SETD2,RNF20,N6AMT1,SNRPD3,MTF2,SMARCB1,OGT,BRCA1,KDM1A,WDR61,EZH2,NELFE,SNRPB,EHMT2,EED,SETD1A,GSPT1,FBL,CARM1,RBBP5,PAXIP1,ASH2L,PRMT7,IWS1,BCOR,DPY30,SUPT6,ATRX,EHMT1,SUZ12,KMT2D,ICMT,NSD1,PRMT3
regulation of cellular protein metabolic process	GO:0032268	2.76289e-09	8.55864	2681	2742	464	21272	OXSR1,EEFSEC,METTL14,MTG2,PPP2R1A,PRMT5,SEPSECS,PPP2CA,DPH5,BCCIP,CHMP6,TXN1,L3MBTL2,ELP3,TYMS,EIF2S3X,EIF6,TIMM17A,G6PDX,PRMT1,CDC37,STK11,TELO2,TFRC,DPH6,MRE11A,PSMD14,NSUN3,DPH2,NCBP1,HDAC1,LRPPRC,DHX33,SMARCC1,TRIAP1,ATP6V0C,MTG1,DPH3,RNF40,CTCF,VPS25,DDX3X,RUVBL2,PPP2R3C,IGBP1,TSFM,TRUB2,IL6ST,RBX1,HDAC3,DHX29,ACTB,RAD51,BIRC5,SETD5,PCID2,SOX2,EIF3K,EIF3D,QARS,GPI1,NCBP2,EIF2B1,TARDBP,EIF3A,…
protein transport	GO:0015031	2.7715e-09	8.55728	1823	2742	336	21272	NSF,VPS29,ZPR1,GOLT1B,PPP2CA,CLTC,VHL,IPO13,CHMP6,THOC3,TXN1,EXOC7,EIF6,HNRNPU,TIMM17A,TIMM10,TIMM50,PABPN1,NUP43,YKT6,IPO7,HSPA4,TFRC,NCBP1,HDAC1,SRP72,DPH3,TOMM22,VPS25,ACTR3,HSPA9,ZW10,ARF1,HDAC3,MFN2,TCP1,MTX2,MBTPS1,NACA,BIRC5,PCID2,TNPO3,NAPA,NUP85,GPI1,SNF8,TARDBP,POLA2,GOSR2,ARPC2,ABCE1,NXT1,ACSL4,RBM22,DNAJC15,RAE1,NUP88,COG4,RAN,SEC61A1,DNM1L,ARFRP1,SRP19,PHAX,PMPCB,VPS11,BTF3,SRSF3,TIM…
regulation of transcription, DNA-templated	GO:0006355	3.02952e-09	8.51863	3310	2742	555	21272	HIST1H2AE,HIST1H2AN,ZPR1,PPP2CA,VHL,KAT8,DR1,TXN1,L3MBTL2,ELP3,HNRNPU,SCAP,DDX5,POU5F1,NR0B1,DNAJC2,MAX,NELFB,MED26,TFRC,MED20,UXT,HDAC1,DHX33,NEDD8,MED12,SMARCC1,TRIAP1,FANCA,SMARCE1,CTCF,GTF2B,DDX3X,VPS72,ZFP281,RUVBL2,ACTR3,IGBP1,CIAO1,MRPL12,PFDN5,NAA15,HDAC3,TRAIP,EAF1,KDM8,NACA,BIRC5,SETD5,PCID2,MED7,SOX2,ELL,SAP130,QARS,NUP85,MED10,HIST2H3C1,ACTR2,SNF8,SSU72,HIST1H3F,NCOA3,PCNA,CDK7,THAP11…
cytochrome complex assembly	GO:0017004	3.19032e-09	8.49617	36	2742	23	21272	SCO2,PET117,COX15,COX10,COA5,COX18,UQCC2,COX17,SCO1,UQCR10,UQCC1,COA6,COX20,FASTKD3,OXA1L,COA4,COX14,HCCS,UQCC3,COX19,COX16,PET100,TACO1
protein targeting to mitochondrion	GO:0006626	3.45206e-09	8.46192	76	2742	35	21272	TIMM17A,TIMM10,TIMM50,HSPA4,TOMM22,MFN2,DNAJC15,PMPCB,TIMM44,PAM16,GRPEL1,MIPEP,CHCHD4,NDUFA13,AIFM1,ROMO1,PMPCA,TIMM9,HSPD1,TOMM7,UQCRC2,SAMM50,TOMM40,TIMM13,TOMM70A,TIMM8A1,TIMM22,MTERF4,TOMM20,PARL,AGK,DNLZ,FBXW7,MFF,PDCD5
negative regulation of mitotic cell cycle phase transition	GO:1901991	3.97426e-09	8.40074	137	2742	50	21272	XRCC3,MRE11A,ZW10,BIRC5,PCID2,CHEK1,BUB3,RFWD3,CDC73,HUS1,CDT1,CDK1,TOPBP1,PLK1,ATM,DONSON,PSMG2,SPDL1,AURKB,RPL26,RPA2,NBN,RAD17,BLM,BRCA1,ZFP36L1,EZH2,ORC1,TPR,MAD2L1,MAD1L1,TRIP13,PRKDC,GIGYF2,ZFP207,CEP192,MDM2,PINX1,MAD2L1BP,NDC80,IK,TTK,RAD21,ZFP830,FBXO5,KLF4,CCNG1,APC,CCNB1,NAE1
electron transport chain	GO:0022900	3.97426e-09	8.40074	137	2742	50	21272	GLRX5,SCO2,NDUFA8,TXNRD2,NDUFS2,ISCU,GLRX3,UQCRC1,SDHA,NDUFB9,DNAJC15,COX7B,COX10,NDUFS8,NDUFS1,COX6C,MYBBP1A,NDUFB8,SDHB,AIFM1,MTCH2,CDK1,NDUFB6,COX5B,CYCS,UQCRB,NDUFV2,UQCRFS1,UQCR10,NDUFA5,POLG2,FDX1L,NDUFA10,COA6,FDX1,TXNRD1,UQCRQ,CYC1,ETFDH,DLD,NDUFB3,SDHD,SDHC,ETFA,COX7C,SOD2,UQCC3,CCNB1,NDUFC2,COX4I1
negative regulation of nuclear division	GO:0051784	4.21029e-09	8.37569	62	2742	31	21272	XRCC3,ZW10,BIRC5,PCID2,CHEK1,BUB3,RAD1,CDT1,PRKAR1A,PLK1,ATM,PSMG2,SPDL1,AURKB,NAA10,TPR,MAD2L1,MAD1L1,MTBP,TRIP13,ZFP207,CEP192,MAD2L1BP,NDC80,IK,TTK,RAD21,ATRX,FBXO5,APC,CCNB1
chromatin remodeling	GO:0006338	4.49239e-09	8.34752	164	2742	56	21272	DR1,POU5F1,RBBP4,HDAC1,SMARCC1,SMARCE1,VPS72,RUVBL2,PIH1D1,SETDB1,SMARCA4,FAM208A,SMARCAD1,SRCAP,RNF8,DNMT1,TRIM28,MYC,CHD8,ACTL6A,DAXX,JARID2,MPHOSPH8,DMAP1,BPTF,PBRM1,HMGB2,RUVBL1,TTF1,SMARCB1,HMGB1,SMARCA5,ACTR8,HCFC1,INO80,OIP5,TPR,HELLS,NAA40,NPM1,TOP1,PHF8,PTMA,INO80B,ACTR6,MORC2A,CENPP,ATF7IP,ATRX,NRDE2,RERE,NUDT5,CHD1,ARID1A,KDM5C,TADA2A
tRNA modification	GO:0006400	6.17948e-09	8.20905	81	2742	36	21272	HSD17B10,CTU1,ELP5,IKBKAP,ELP3,ELP6,MOCS3,NSUN3,TRMT61A,AARS2,DPH3,TRMU,GTPBP3,ADAT3,MTO1,TRMT112,ELP2,AARS,TRIT1,URM1,TRMT5,MTFMT,PUS7,NAT10,NSUN4,OSGEP,ELP4,THG1L,TRMT10C,ALKBH1,CTU2,NSUN2,KTI12,TRMT6,TPRKB,ADAT2
negative regulation of cell cycle process	GO:0010948	6.65668e-09	8.17674	217	2742	67	21272	XRCC3,MRE11A,NUBP1,ZW10,BIRC5,PCID2,CHEK1,BUB3,MDM4,RFWD3,CDC73,RAD1,HUS1,CDT1,CDK1,TOPBP1,PRKAR1A,PLK1,CDK9,ATM,DONSON,PSMG2,SPDL1,AURKB,RPL26,RPA2,NBN,CDK4,RAD17,BLM,BRCA1,HSP90AB1,NAA10,ZFP36L1,EZH2,ORC1,TPR,BABAM1,NPM1,MAD2L1,MAD1L1,MTBP,TRIP13,PRKDC,GIGYF2,ZFP207,CEP192,CCNF,MDM2,PINX1,NEK2,MAD2L1BP,RPL23,NDC80,IK,PPP1R10,TTK,RAD21,ATRX,ZFP830,FBXO5,KLF4,MIF,CCNG1,APC,CCNB1,NAE1
spindle checkpoint	GO:0031577	7.40049e-09	8.13074	37	2742	23	21272	XRCC3,ZW10,BIRC5,PCID2,BUB3,CDT1,PLK1,ATM,PSMG2,SPDL1,AURKB,TPR,MAD2L1,MAD1L1,TRIP13,ZFP207,CEP192,MAD2L1BP,NDC80,IK,TTK,APC,CCNB1
mitotic spindle assembly checkpoint	GO:0007094	7.40049e-09	8.13074	37	2742	23	21272	XRCC3,ZW10,BIRC5,PCID2,BUB3,CDT1,PLK1,ATM,PSMG2,SPDL1,AURKB,TPR,MAD2L1,MAD1L1,TRIP13,ZFP207,CEP192,MAD2L1BP,NDC80,IK,TTK,APC,CCNB1
mitotic spindle checkpoint	GO:0071174	7.40049e-09	8.13074	37	2742	23	21272	XRCC3,ZW10,BIRC5,PCID2,BUB3,CDT1,PLK1,ATM,PSMG2,SPDL1,AURKB,TPR,MAD2L1,MAD1L1,TRIP13,ZFP207,CEP192,MAD2L1BP,NDC80,IK,TTK,APC,CCNB1
spindle assembly checkpoint	GO:0071173	7.40049e-09	8.13074	37	2742	23	21272	XRCC3,ZW10,BIRC5,PCID2,BUB3,CDT1,PLK1,ATM,PSMG2,SPDL1,AURKB,TPR,MAD2L1,MAD1L1,TRIP13,ZFP207,CEP192,MAD2L1BP,NDC80,IK,TTK,APC,CCNB1
protein ubiquitination	GO:0016567	7.76723e-09	8.10973	739	2742	162	21272	PRPF19,UBA1,VHL,PPIL2,FANCL,BRAP,DCAF7,SKP1A,MED20,MED12,RNF40,DCAF13,DDX3X,RBX1,UBE2M,TRAIP,MED7,SDE2,MED10,SPOP,LZTR1,ANAPC1,ANAPC11,UBE2N,ARIH1,RFWD3,DNAJA3,DNM1L,RPL5,DDB1,CUL3,HUWE1,CDC16,RPS2,CDC73,KEAP1,TRIM71,ANAPC2,RNF8,KCTD10,UBA52,TRIM28,DET1,CTR9,PAF1,MED21,BIRC6,GTPBP4,WAC,CUL4B,PEX12,MASTL,U2AF2,MED30,RBBP6,CDC23,UBE2G2,AURKAIP1,MED18,E4F1,UBE4B,RPL11,VCP,NSMCE1,RPS3,UHRF1,GNL3L,MED…
positive regulation of cellular amide metabolic process	GO:0034250	8.01555e-09	8.09607	157	2742	54	21272	EIF2S3X,EIF6,DDX3X,TRUB2,DHX29,EIF3D,EEF2,MRPS27,EIF3C,RPUSD4,RPL5,RPS4X,UQCC2,HNRNPL,NAT10,RPL30,EIF4G2,DHX36,EIF2B5,RPS9,USP16,EP300,NSUN4,EIF3E,UQCC1,POLR2D,POLR2G,SP1,RPL26,CDK4,TRMT10C,POLDIP3,EIF4A3,FASTKD3,NPM1,MPV17L2,ABCF1,DAZL,PRKCD,ELAVL1,MAPK1,LARP4,EIF5A,RPS3A1,CIRBP,KHDRBS1,MTOR,SERP1,PAIP1,SECISBP2,OTUD6B,METTL3,NGRN,RPS6KB1
transcription by RNA polymerase I	GO:0006360	8.72842e-09	8.05906	53	2742	28	21272	DHX33,ERCC2,UTP15,PIH1D1,PWP1,SMARCA4,UBTF,WDR75,TAF1C,DDX11,POLR1C,ERCC3,WDR43,POLR2L,TTF1,SMARCB1,MARS,NCL,HEATR1,CD3EAP,POLR1A,TAF1B,PHF8,RRN3,GTF2H5,MTOR,ZNRD1,POLR1E
histone methylation	GO:0016571	8.98464e-09	8.0465	144	2742	51	21272	WDR82,PRMT5,L3MBTL2,PRMT1,CTCF,SETD5,PIH1D1,PWP1,RIF1,SETDB1,CXXC1,DNMT1,CTR9,PAF1,BRD4,KMT2B,FH1,ZFP335,WDR5,RTF1,PRDM14,NELFA,JARID2,SETD2,RNF20,MTF2,SMARCB1,OGT,BRCA1,KDM1A,WDR61,EZH2,NELFE,EHMT2,EED,SETD1A,FBL,CARM1,RBBP5,PAXIP1,ASH2L,PRMT7,IWS1,BCOR,DPY30,SUPT6,ATRX,EHMT1,SUZ12,KMT2D,NSD1
regulation of protein metabolic process	GO:0051246	9.17615e-09	8.03734	2866	2742	488	21272	OXSR1,EEFSEC,NSF,METTL14,MTG2,PPP2R1A,PRMT5,SEPSECS,PPP2CA,VHL,DPH5,BCCIP,CHMP6,TXN1,L3MBTL2,ELP3,TYMS,EIF2S3X,EIF6,TIMM17A,G6PDX,PRMT1,CDC37,STK11,TELO2,TFRC,DPH6,MRE11A,PSMD14,NSUN3,DPH2,NCBP1,HDAC1,LRPPRC,DHX33,NEDD8,SMARCC1,TRIAP1,ATP6V0C,MTG1,DPH3,RNF40,CTCF,VPS25,DDX3X,RUVBL2,PPP2R3C,IGBP1,TSFM,TRUB2,IL6ST,RBX1,HDAC3,DHX29,ACTB,RAD51,BIRC5,SETD5,PCID2,SOX2,EIF3K,EIF3D,QARS,GPI1,NCBP2,EIF2B1…
positive regulation of gene expression	GO:0010628	1.02911e-08	7.98754	2275	2742	401	21272	PRPF19,ZPR1,VHL,KAT8,DR1,RIOK1,EIF2S3X,EIF6,HNRNPU,TIMM17A,SCAP,DDX5,POU5F1,DNAJC2,MAX,MED26,TFRC,FAM98B,NCBP1,HDAC1,SF3B4,DHX33,MED12,SMARCC1,TRIAP1,POLR3B,CTCF,GTF2B,DDX3X,ZFP281,RUVBL2,ACTR3,IGBP1,MRPL12,TRUB2,NAA15,HDAC3,DHX29,EAF1,DIMT1,KDM8,NACA,PCID2,SOX2,ELL,POLR3F,EIF3D,PABPC1,NUP85,MED10,ACTR2,NCBP2,SNF8,TARDBP,NCOA3,CDK7,JMJD6,TOP2A,SRSF1,ILF2,EEF2,SIN3A,MMS19,ERCC2,RBM22,HNRNPK,PARP1,…
regulation of transcription by RNA polymerase II	GO:0006357	1.03273e-08	7.98601	1934	2742	350	21272	PPP2CA,VHL,KAT8,DR1,TXN1,ELP3,HNRNPU,SCAP,DDX5,POU5F1,NR0B1,MAX,MED26,MED20,UXT,HDAC1,NEDD8,MED12,SMARCC1,TRIAP1,CTCF,GTF2B,DDX3X,ZFP281,RUVBL2,ACTR3,IGBP1,CIAO1,HDAC3,EAF1,NACA,MED7,SOX2,ELL,SAP130,MED10,HIST2H3C1,ACTR2,SNF8,SSU72,HIST1H3F,NCOA3,PCNA,CDK7,THAP11,SPOP,JMJD6,TOP2A,SIN3A,TADA1,ERCC2,HNRNPK,PARP1,CHEK1,MDM4,XRCC6,RPL10,PRDM10,DNAJA3,RIF1,SMARCA4,RPRD1B,PRPF6,WDR77,SLC30A9,GTF2F1,CUL…
ribosomal small subunit assembly	GO:0000028	1.09242e-08	7.96161	17	2742	15	21272	ERAL1,RRP7A,RPS2,RPS27,ABT1,RPS10,PWP2,RPSA,RPS25,RPL38,MRPS7,RPS15,RPS19,RPS14,RPS28
tRNA wobble uridine modification	GO:0002098	1.09242e-08	7.96161	17	2742	15	21272	CTU1,ELP5,IKBKAP,ELP3,ELP6,MOCS3,DPH3,TRMU,GTPBP3,MTO1,ELP2,URM1,ELP4,CTU2,KTI12
cellular protein catabolic process	GO:0044257	1.39743e-08	7.85467	768	2742	166	21272	PRPF19,UBA1,VHL,CLPP,COPS3,SKP1A,PSMD14,NEDD8,SMARCC1,RNF40,VPS25,RBX1,PSMB6,SNF8,SPOP,ANAPC1,ANAPC11,UBE2N,ARIH1,PSMA1,PSMD2,PDCL3,PSMA6,BAP1,PSMA5,VPS11,RPL5,DDB1,CUL3,KAT5,PSMC5,HUWE1,PSMC1,CDC16,KEAP1,PSMD4,TRIM71,ANAPC2,RNF8,KCTD10,UBA52,PSMD3,UQCC2,PSMB1,PSMC6,DET1,PSMD6,CSNK1A1,FAF2,BIRC6,PSMC4,WAC,CUL4B,RAB7,PSMA3,RGP1,USP37,RBBP6,UBE2G2,USP10,PTPN23,UBE4B,RPL11,SUMO2,PSMB4,VCP,PSMB7,USP1…
negative regulation of telomere maintenance	GO:0032205	1.59732e-08	7.79661	35	2742	22	21272	RTEL1,HNRNPU,TEN1,ERCC4,EXOSC10,NAT10,TINF2,GNL3L,ATM,MCRS1,HNRNPA1,NBN,HNRNPC,TERF1,XRCC5,PINX1,CTC1,XRCC1,DCP2,TERF2,SLX4,ACD
proteolysis involved in cellular protein catabolic process	GO:0051603	1.86146e-08	7.73015	717	2742	157	21272	PRPF19,UBA1,VHL,CLPP,COPS3,SKP1A,PSMD14,NEDD8,SMARCC1,RNF40,VPS25,RBX1,PSMB6,SNF8,SPOP,ANAPC1,ANAPC11,UBE2N,ARIH1,PSMA1,PSMD2,PDCL3,PSMA6,BAP1,PSMA5,RPL5,DDB1,CUL3,KAT5,PSMC5,HUWE1,PSMC1,CDC16,KEAP1,PSMD4,TRIM71,ANAPC2,RNF8,KCTD10,UBA52,PSMD3,PSMB1,PSMC6,DET1,PSMD6,CSNK1A1,FAF2,BIRC6,PSMC4,WAC,CUL4B,PSMA3,USP37,RBBP6,UBE2G2,USP10,PTPN23,UBE4B,RPL11,SUMO2,PSMB4,VCP,PSMB7,USP16,UHRF1,PLK1,USP36,XPO…
positive regulation of telomere maintenance	GO:0032206	1.98531e-08	7.70217	51	2742	27	21272	RTEL1,MRE11A,CCT7,CCT2,TCP1,DKC1,CCT3,CCT4,CCT5,DHX36,ATM,PARN,AURKB,GNL3,HNRNPA1,NBN,PNKP,CCT8,XRCC5,NEK2,NAF1,MAPK1,PPP1R10,ATRX,TERF2,SLX4,ACD
translational elongation	GO:0006414	1.98531e-08	7.70217	51	2742	27	21272	EEFSEC,SEPSECS,DPH5,TUFM,DPH6,DPH2,DPH3,TSFM,GFM1,MRPL44,EEF2,EEF1A1,AARS,RPLP2,EEF1G,RPLP1,SRP9,RPL30,USP16,ZFP598,ALKBH1,EIF4A3,HBS1L,DPH1,DNAJC24,EIF5A,SECISBP2
blastocyst growth	GO:0001832	2.20795e-08	7.65601	27	2742	19	21272	PRPF19,ZPR1,SBDS,POU5F1,PELO,CHEK1,SMARCA4,NCAPG2,TAF8,CTR9,BRD4,RTF1,NBN,GINS1,RAD51B,BRCA2,PALB2,ZFP830,GINS4
regulation of alternative mRNA splicing, via spliceosome	GO:0000381	2.46848e-08	7.60757	69	2742	32	21272	HNRNPU,DDX5,SRSF1,SRSF3,MAGOH,ZC3H10,SRSF5,SRSF7,HNRNPL,PTBP1,SMU1,TRA2B,RBM25,WTAP,RBM17,HNRNPA1,EIF4A3,SRSF10,RBM8A,DYRK1A,RBFOX2,SRSF2,SART3,IK,RBM15,RBM19,THRAP3,KHDRBS1,RNPS1,SRSF6,DDX17,RBM10
organic cyclic compound catabolic process	GO:1901361	2.51892e-08	7.59879	449	2742	110	21272	PNPT1,METTL14,ZPR1,FEN1,SKIV2L,DDX49,HNRNPU,DUT,DDX5,NCBP1,ITPA,LRPPRC,APEX1,PCID2,PELO,PABPC1,MRTO4,NCBP2,TARDBP,LSM2,RNASEH2A,LSM7,EXOSC10,UPF1,DKC1,DIS3,EXOSC3,CNOT3,CNOT10,RNASEH2B,FASTKD1,MAGOH,PAM16,DNA2,SMG1,TRIM71,SSB,EXOSC2,AHCY,SUPV3L1,RNASEH2C,DHX36,AIFM1,LSM6,MTPAP,EXOSC5,VCP,ETF1,EXOSC8,SKIV2L2,EXOSC7,MGAT1,CNOT8,DROSHA,METTL16,EIF3E,PRPF18,ATM,PARN,POLR2D,YBX1,PDE12,POLR2G,POP1,LSM5…
sister chromatid cohesion	GO:0007062	2.84088e-08	7.54655	55	2742	28	21272	PPP2R1A,FEN1,SMC5,MRE11A,SMC3,PHB2,DDX11,CHTF8,PDS5B,DSCC1,RAD51C,POGZ,ESCO2,NSMCE2,NAA50,NAA10,SMC1A,CDC20,NIPBL,MAU2,PDS5A,CDCA5,RAD21,MCMBP,ATRX,STAG2,KIF22,FBXW7
cytoplasmic translational initiation	GO:0002183	3.42595e-08	7.46522	33	2742	21	21272	EIF2S3X,EIF3F,DHX29,EIF3K,EIF3D,EIF3A,EIF5,EIF3C,EIF3I,RPS2,EIF2B3,EIF3H,EIF3L,EIF4A1,EIF3E,EIF3B,EIF3G,EIF3M,EIF3J1,METTL3,EIF2S2
regulation of transcription elongation from RNA polymerase II promoter	GO:0034243	3.42595e-08	7.46522	33	2742	21	21272	HNRNPU,ELL,GTF2F1,NELFCD,CDC73,RNF8,CTR9,PAF1,BRD4,RTF1,WDR43,NELFA,CDK9,EAPP,WDR61,EZH2,NELFE,SUPT4A,GTF2F2,SUPT6,RNF168
mitochondrial transmembrane transport	GO:1990542	3.48493e-08	7.45781	85	2742	36	21272	PNPT1,ATP5A1,SLC25A37,TIMM17A,TIMM50,LETM1,SLC25A28,OPA1,DNAJC15,TIMM44,STOML2,PAM16,ATP5H,ATP5B,ATP5C1,GRPEL1,CHCHD4,AIFM1,ROMO1,ATP5J2,MRPL18,ATP5K,ATP5O,HSPD1,TOMM7,ATP5J,ATP5L,MCUR1,TOMM40,ATP5D,CYC1,TOMM20,ATP5E,SLC25A32,DNLZ,SLC25A36
attachment of spindle microtubules to kinetochore	GO:0008608	3.60606e-08	7.44297	36	2742	22	21272	HNRNPU,RACGAP1,KIF2C,BUB3,ECT2,MIS12,CDT1,CHAMP1,AURKB,BECN1,SPAG5,MAD1L1,ZFP207,CENPC1,NEK2,NDC80,BRCA2,CENPE,SEH1L,CDC42,APC,CCNB1
organelle assembly	GO:0070925	4.60624e-08	7.33665	791	2742	168	21272	CLTC,BCCIP,SBDS,EIF6,HNRNPU,RPLP0,HAUS4,RACGAP1,CENPA,DDX3X,ACTR3,CENPN,HDAC3,TUBB5,MFN2,DHX29,BIRC5,RSL24D1,RCC1,MRTO4,ACTR2,BOP1,ARPC2,DNAAF5,MRPS2,NLE1,MDN1,RPL10,RPL12,DDX28,SMC3,CDS2,ERAL1,VPS11,INCENP,RPL5,RRS1,WDR1,RRP7A,SENP6,PPAN,MRPL11,RPS2,RPF2,NUDCD3,TUBGCP5,HAUS7,RPS27,E2F4,MIS12,MAPRE1,KIF11,RAB7,ABT1,KIF23,MYBL2,EIF2S1,CFAP20,CENPW,PTPN23,RPL6,RPS10,RPL11,HAUS3,PIK3C3,NUMA1,PWP2,RP…
maturation of 5.8S rRNA from tricistronic rRNA transcript (SSU-rRNA, 5.8S rRNA, LSU-rRNA)	GO:0000466	5.76699e-08	7.23905	18	2742	15	21272	BOP1,WDR12,EXOSC10,EXOSC3,RRS1,FTSJ3,EXOSC2,ABT1,EXOSC8,EXOSC7,RPS21,FCF1,NPM1,RCL1,PES1
protein localization to chromosome, telomeric region	GO:0070198	6.03522e-08	7.21931	28	2742	19	21272	CCT7,CCT2,TCP1,ATR,DKC1,CCT3,CCT4,TINF2,CCT5,GNL3L,GNL3,CCT8,TERF1,WRAP53,PINX1,BRCA2,ATRX,TERF2,ACD
peptide transport	GO:0015833	6.59491e-08	7.18079	1875	2742	337	21272	NSF,VPS29,ZPR1,GOLT1B,PPP2CA,CLTC,VHL,IPO13,CHMP6,THOC3,TXN1,EXOC7,EIF6,HNRNPU,TIMM17A,TIMM10,TIMM50,PABPN1,NUP43,YKT6,IPO7,HSPA4,TFRC,NCBP1,HDAC1,SRP72,DPH3,TOMM22,VPS25,ACTR3,HSPA9,ZW10,ARF1,HDAC3,MFN2,TCP1,MTX2,MBTPS1,NACA,BIRC5,PCID2,TNPO3,NAPA,NUP85,GPI1,SNF8,TARDBP,POLA2,GOSR2,ARPC2,ABCE1,NXT1,ACSL4,RBM22,DNAJC15,RAE1,NUP88,COG4,RAN,SEC61A1,DNM1L,ARFRP1,SRP19,PHAX,PMPCB,VPS11,BTF3,SRSF3,TIM…
cellular catabolic process	GO:0044248	7.0058e-08	7.15454	1996	2742	355	21272	PNPT1,PRPF19,METTL14,ZPR1,UBA1,CLTC,FEN1,VHL,KAT8,SKIV2L,DDX49,HNRNPU,DUT,DDX5,CLPP,CDC37,STK11,COPS3,SKP1A,PSMD14,NCBP1,ITPA,LRPPRC,VDAC1,NEDD8,SMARCC1,RNF40,VPS25,DLST,RBX1,MFN2,APEX1,PSMB6,PCID2,PELO,PABPC1,MRTO4,GPI1,NCBP2,SNF8,ERCC4,TARDBP,SPOP,ANAPC1,LSM2,RNASEH2A,ANAPC11,LSM7,EXOSC10,UBE2N,ARIH1,PGAM1,UPF1,DKC1,PSMA1,PSMD2,DIS3,EXOSC3,PDCL3,PSMA6,DNM1L,BAP1,PSMA5,CNOT3,VPS11,CNOT10,RPL5,DD…
negative regulation of mRNA processing	GO:0050686	7.29223e-08	7.13714	31	2742	20	21272	RNF40,HNRNPK,SFSWAP,SRSF7,HNRNPL,CTR9,PTBP1,U2AF2,TRA2B,SUPT5,CDK9,RNF20,SRSF10,NPM1,NELFE,DYRK1A,RNPS1,SRSF6,RBM10,CCNT1
positive regulation of DNA biosynthetic process	GO:2000573	7.45229e-08	7.12771	79	2742	34	21272	CCT7,RFC2,CCT2,TCP1,PCNA,RFC5,DKC1,RFC4,CCT3,GFER,CCT4,RFC3,CCT5,MYC,CHTF18,CHTF8,DSCC1,ATM,POLG2,PARN,AURKB,HNRNPA1,PNKP,CCT8,HSP90AB1,WRAP53,NPM1,XRCC5,NEK2,NVL,NAF1,MAPK1,KLF4,ACD
response to ionizing radiation	GO:0010212	7.6939e-08	7.11385	156	2742	52	21272	RAD9A,STK11,RAD51,INTS3,PARP1,ATR,XRCC6,RFWD3,LIG4,RRM1,KAT5,KARS,POLG,RNF8,RAD1,ECT2,FIGNL1,GRB2,MYC,HUS1,TOPBP1,ATM,RPL26,XRCC2,POLB,FANCD2,RAD54L,BLM,BRCA1,INO80,KDM1A,INTS7,DNM2,BABAM1,XRCC4,NIPBL,BRAT1,XRCC5,PRKDC,BCL2L1,NAMPT,MDM2,PAXIP1,GTF2H5,HSPA5,MSH2,BRCA2,H2AFX,SOD2,MAPK14,RNF168,CBL
ATP synthesis coupled electron transport	GO:0042773	7.7716e-08	7.10949	64	2742	30	21272	NDUFA8,NDUFS2,ISCU,UQCRC1,SDHA,NDUFB9,DNAJC15,NDUFS8,NDUFS1,NDUFB8,MTCH2,CDK1,NDUFB6,CYCS,UQCRB,NDUFV2,UQCRFS1,UQCR10,NDUFA10,COA6,UQCRQ,CYC1,DLD,SDHD,SDHC,COX7C,UQCC3,CCNB1,NDUFC2,COX4I1
positive regulation of transcription, DNA-templated	GO:0045893	7.95476e-08	7.09937	1509	2742	281	21272	ZPR1,VHL,KAT8,DR1,HNRNPU,SCAP,POU5F1,DNAJC2,MAX,HDAC1,DHX33,MED12,SMARCC1,TRIAP1,CTCF,GTF2B,DDX3X,ZFP281,RUVBL2,ACTR3,IGBP1,MRPL12,NAA15,HDAC3,EAF1,KDM8,NACA,PCID2,SOX2,ELL,NUP85,MED10,ACTR2,NCOA3,CDK7,JMJD6,TOP2A,ILF2,SIN3A,MMS19,ERCC2,HNRNPK,PARP1,UTP15,PIH1D1,CHEK1,XRCC6,PRDM10,PWP1,SMARCA4,CXXC1,RPRD1B,PRPF6,SLC30A9,GTF2F1,KAT5,PSMC5,WDR75,ILF3,NANOG,PFN1,KARS,THOC1,CDC73,STAT3,MNAT1,PHF5A,TB…
mRNA polyadenylation	GO:0006378	1.24376e-07	6.90526	44	2742	24	21272	PNPT1,CPSF3,PABPN1,CPSF1,CPSF2,CLP1,RNF40,SSU72,FIP1L1,TUT1,CDC73,NUDT21,CTR9,PAF1,MTPAP,SUPT5,CDK9,RNF20,WDR33,ZC3H3,CSTF2,NELFE,PCF11,CCNT1
protein targeting	GO:0006605	1.30012e-07	6.88601	271	2742	75	21272	TIMM17A,TIMM10,TIMM50,HSPA4,SRP72,TOMM22,ACTR3,MFN2,GOSR2,ARPC2,DNAJC15,SEC61A1,SRP19,PMPCB,TIMM44,PAM16,SRP9,GRPEL1,RAB7,PEX12,MIPEP,CHCHD4,NDUFA13,AIFM1,ROMO1,WRB,PMPCA,PEX10,RPL11,TIMM9,SRP68,SPCS2,VPS13D,HSPD1,TOMM7,PEX3,SEC63,UQCRC2,OGT,PEX5,SAMM50,TOMM40,SEC61B,TIMM13,TOMM70A,SEC61G,SRP54B,HSPA8,TIMM8A1,SRP54A,AKT2,HGS,PEX13,RABGEF1,VPS41,TIMM22,PEX2,PEX1,MTERF4,TOMM20,PEX7,PARL,HSPA5,AP3B1…
DNA-dependent DNA replication maintenance of fidelity	GO:0045005	1.6285e-07	6.78821	38	2742	22	21272	RTEL1,MRE11A,MMS22L,RAD51,PCNA,RFWD3,DNA2,THOC1,POLE,DDX11,TIMELESS,MCM9,POLD1,TIPIN,TONSL,CDK9,DONSON,FANCM,BLM,BRCA2,ATRX,ZFP830
negative regulation of mRNA metabolic process	GO:1903312	1.71661e-07	6.76533	81	2742	34	21272	HNRNPU,RNF40,PABPC1,TARDBP,HNRNPK,SFSWAP,SRSF7,HNRNPL,CTR9,PTBP1,U2AF2,TRA2B,SUPT5,CDK9,RNF20,METTL16,YBX1,HNRNPC,SRSF10,NPM1,NELFE,FUS,DYRK1A,DAZL,ELAVL1,THRAP3,CIRBP,MTOR,RNPS1,SYNCRIP,SRSF6,SECISBP2,RBM10,CCNT1
regulation of protein modification by small protein conjugation or removal	GO:1903320	1.81813e-07	6.74037	237	2742	68	21272	RNF40,DDX3X,RBX1,UBE2N,DNAJA3,UBA2,DNM1L,RPL5,CUL3,HUWE1,RPS2,CTR9,GTPBP4,MASTL,U2AF2,RPL11,SUMO2,VCP,RPS3,GNL3L,SAE1,PLK1,DAXX,CDK9,RNF20,GLMN,FANCM,SPRTN,OGT,GNL3,OTUB1,PIAS4,PHF23,BRCA1,HSP90AB1,MUL1,KDM1A,CDC20,NPM1,MAD2L1,MTBP,WDR48,RPS7,DNAJA1,PINX1,CAML,SART3,PAXIP1,RPL23,OTUD4,HSPA5,SENP2,UBR5,UBE3A,UBE2I,FKBP1A,MTOR,FBXO5,HERPUD1,HMG20A,TOPORS,N4BP1,ZMIZ1,UBE2S,SMAD7,DERL1,FBXW7,PRMT3
centrosome cycle	GO:0007098	2.1686e-07	6.66382	128	2742	45	21272	XRCC3,HAUS4,UXT,NUBP1,CHEK1,HAUS7,KIF11,HAUS3,RANBP1,CHMP3,PLK1,XPO1,HAUS5,AURKA,CKAP5,ARL2,CEP85,XRCC2,BRCA1,MCPH1,NPM1,WDR62,CHORDC1,PCM1,CDK2,PPP1R12A,CENPJ,SLC16A1,DCTN1,CEP192,CCNF,NEK2,CHMP1A,HAUS2,NUP62,BRCA2,HAUS8,HAUS1,UVRAG,RTTN,CNTROB,POC1A,CEP152,STIL,AZIN1
microtubule organizing center organization	GO:0031023	2.19812e-07	6.65795	137	2742	47	21272	XRCC3,HAUS4,UXT,NUBP1,CHEK1,HAUS7,E2F4,KIF11,HAUS3,RANBP1,CHMP3,PLK1,XPO1,HAUS5,AURKA,CKAP5,ARL2,CEP85,XRCC2,BRCA1,MCPH1,NPM1,WDR62,CHORDC1,PCM1,CDK2,PPP1R12A,CENPJ,SLC16A1,DCTN1,CEP192,CCNF,NEK2,CHMP1A,HAUS2,NUP62,BRCA2,HAUS8,HAUS1,UVRAG,RTTN,CNTROB,PAFAH1B1,POC1A,CEP152,STIL,AZIN1
regulation of histone modification	GO:0031056	2.22224e-07	6.65321	160	2742	52	21272	L3MBTL2,RNF40,CTCF,RUVBL2,SETD5,SIN3A,UBE2N,PIH1D1,CHEK1,RIF1,DNMT1,CTR9,PAF1,BRD4,KMT2B,FH1,ZFP335,WDR5,RTF1,EP300,NELFA,CDK9,JARID2,RNF20,ATM,MTF2,SMARCB1,OGT,KAT7,FLCN,OTUB1,BRCA1,KDM1A,WDR61,TAF7,NELFE,NIPBL,EHMT2,EED,SART3,PAXIP1,IWS1,BCOR,UBR5,SUPT6,ATRX,TADA3,PARG,NSD1,CCNB1,TADA2A,ING2
mitochondrial ATP synthesis coupled electron transport	GO:0042775	2.43264e-07	6.61392	59	2742	28	21272	NDUFA8,NDUFS2,ISCU,UQCRC1,SDHA,NDUFB9,DNAJC15,NDUFS8,NDUFB8,MTCH2,CDK1,NDUFB6,CYCS,UQCRB,NDUFV2,UQCRFS1,UQCR10,NDUFA10,UQCRQ,CYC1,DLD,SDHD,SDHC,COX7C,UQCC3,CCNB1,NDUFC2,COX4I1
negative regulation of cell cycle phase transition	GO:1901988	2.6392e-07	6.57853	156	2742	51	21272	XRCC3,MRE11A,ZW10,BIRC5,PCID2,CHEK1,BUB3,RFWD3,CDC73,HUS1,CDT1,CDK1,TOPBP1,PLK1,ATM,DONSON,PSMG2,SPDL1,AURKB,RPL26,RPA2,NBN,RAD17,BLM,BRCA1,ZFP36L1,EZH2,ORC1,TPR,BABAM1,MAD2L1,MAD1L1,TRIP13,PRKDC,GIGYF2,ZFP207,CEP192,MDM2,PINX1,MAD2L1BP,NDC80,IK,TTK,RAD21,ZFP830,FBXO5,KLF4,CCNG1,APC,CCNB1,NAE1
DNA damage checkpoint	GO:0000077	2.77811e-07	6.55625	107	2742	40	21272	PRPF19,RAD9A,MRE11A,ATR,CHEK1,RFWD3,TIPRL,RNASEH2B,THOC1,RAD1,HINFP,CDC5L,WAC,HUS1,CDK1,TIPIN,TOPBP1,PLK1,ATM,DONSON,ATRIP,RPL26,RPA2,THOC5,FANCD2,NBN,RAD17,BLM,BRCA1,INTS7,BABAM1,PTPN11,PRKDC,GIGYF2,MDM2,PPP1R10,MSH2,ZFP830,MAPK14,CCNG1
respiratory chain complex IV assembly	GO:0008535	3.20575e-07	6.49407	27	2742	18	21272	SCO2,PET117,COX15,COX10,COA5,COX18,COX17,SCO1,COA6,COX20,FASTKD3,OXA1L,COA4,COX14,COX19,COX16,PET100,TACO1
mRNA cis splicing, via spliceosome	GO:0045292	3.20575e-07	6.49407	27	2742	18	21272	NCBP1,SNRPC,NCBP2,SRSF1,RBM22,SRSF3,SFSWAP,SRSF5,SRSF7,PRPF40A,SRSF10,DCPS,CWC15,SRSF2,WBP11,WBP4,RBM19,SRSF6
nucleotide-excision repair	GO:0006289	3.31814e-07	6.47911	56	2742	27	21272	ERCC4,ERCC2,LIG4,POLR2I,DDB1,MNAT1,POLE,GTF2H2,GTF2H3,RPA1,GTF2H1,DCLRE1B,HUS1,POLD1,ERCC3,USP7,HMGB1,RPA2,KAT7,GTF2H4,RPA3,GTF2H5,BRIP1,BRCA2,XAB2,FANCC,SLX4
organic substance catabolic process	GO:1901575	3.55858e-07	6.44872	1941	2742	343	21272	PNPT1,PRPF19,NSF,METTL14,ZPR1,UBA1,PPP2CA,FEN1,VHL,CHMP6,SKIV2L,DDX49,EIF6,HNRNPU,DUT,DDX5,CLPP,COPS3,SKP1A,PSMD14,NCBP1,ITPA,LRPPRC,NEDD8,SMARCC1,RNF40,VPS25,DLST,RBX1,APEX1,PSMB6,PCID2,PELO,PABPC1,MRTO4,GPI1,NCBP2,SNF8,TARDBP,SPOP,ALDOA,ANAPC1,LSM2,RNASEH2A,ANAPC11,LSM7,EXOSC10,UBE2N,ARIH1,MDM4,PGAM1,UPF1,PGK1,DKC1,PSMA1,PSMD2,DIS3,EXOSC3,PDCL3,PSMA6,DHPS,BAP1,PSMA5,CNOT3,VPS11,CNOT10,RPL5,DDB1…
amide transport	GO:0042886	3.67743e-07	6.43446	1908	2742	338	21272	NSF,VPS29,ZPR1,GOLT1B,PPP2CA,CLTC,VHL,IPO13,CHMP6,THOC3,TXN1,EXOC7,EIF6,HNRNPU,TIMM17A,TIMM10,TIMM50,PABPN1,NUP43,YKT6,IPO7,HSPA4,TFRC,NCBP1,HDAC1,SRP72,DPH3,TOMM22,VPS25,ACTR3,HSPA9,ZW10,ARF1,HDAC3,MFN2,TCP1,MTX2,MBTPS1,NACA,BIRC5,PCID2,TNPO3,NAPA,NUP85,GPI1,SNF8,TARDBP,POLA2,GOSR2,ARPC2,ABCE1,NXT1,ACSL4,RBM22,DNAJC15,RAE1,NUP88,COG4,RAN,SEC61A1,DNM1L,ARFRP1,SRP19,PHAX,PMPCB,VPS11,BTF3,SRSF3,TIM…
protein stabilization	GO:0050821	4.2233e-07	6.37435	172	2742	54	21272	CDC37,TELO2,CCT7,NAA15,CCT2,TCP1,CDK7,MDM4,DNAJA3,PDCL3,RPL5,CCT3,CCT4,PFN1,PHB,PHB2,CCT5,GTPBP4,SEC16A,RPL11,COG7,EP300,USP36,HSPD1,USP7,SWSAP1,WDR81,HYPK,HCFC1,USP9X,GAPDH,CCT8,HSP90AB1,MUL1,CCNH,NPM1,ZFP207,RPS7,SYVN1,MORC3,TBL1X,CAML,RPL23,TSC1,SUMO1,PEX6,ZSWIM7,ATF7IP,MCM8,DNLZ,SMAD7,MTMR9,COG3,FBXW7
maturation of LSU-rRNA from tricistronic rRNA transcript (SSU-rRNA, 5.8S rRNA, LSU-rRNA)	GO:0000463	5.13241e-07	6.28968	15	2742	13	21272	BOP1,WDR12,DDX18,FTSJ3,RPF2,GTPBP4,RPL7L1,RPL7,ZNHIT6,RPL35,NPM1,ZNHIT3,PES1
snRNA processing	GO:0016180	6.58643e-07	6.18135	25	2742	17	21272	INTS3,EXOSC3,INTS8,TUT1,EXOSC2,INTS4,EXOSC5,EXOSC8,EXOSC7,INTS5,INTS6,INTS9,TOE1,EXOSC4,INTS7,USB1,INTS1
RNA polyadenylation	GO:0043631	7.70034e-07	6.11349	47	2742	24	21272	PNPT1,CPSF3,PABPN1,CPSF1,CPSF2,CLP1,RNF40,SSU72,FIP1L1,TUT1,CDC73,NUDT21,CTR9,PAF1,MTPAP,SUPT5,CDK9,RNF20,WDR33,ZC3H3,CSTF2,NELFE,PCF11,CCNT1
histone ubiquitination	GO:0016574	7.70034e-07	6.11349	47	2742	24	21272	SKP1A,RNF40,UBE2N,DDB1,HUWE1,CDC73,RNF8,CTR9,PAF1,WAC,CUL4B,UHRF1,CDK9,RNF20,RYBP,ATXN7L3,OTUB1,KDM1A,BCOR,UBR5,USP22,SUZ12,PCGF6,RNF168
protein catabolic process	GO:0030163	7.70679e-07	6.11313	924	2742	185	21272	PRPF19,NSF,UBA1,PPP2CA,VHL,CHMP6,CLPP,COPS3,SKP1A,PSMD14,NEDD8,SMARCC1,RNF40,VPS25,RBX1,PSMB6,SNF8,SPOP,ANAPC1,ANAPC11,UBE2N,ARIH1,MDM4,PSMA1,PSMD2,PDCL3,PSMA6,BAP1,PSMA5,VPS11,RPL5,DDB1,CUL3,KAT5,PSMC5,HUWE1,PSMC1,CDC16,KEAP1,PSMD4,TRIM71,ANAPC2,RNF8,PHB,KCTD10,UBA52,PSMD3,UQCC2,PSMB1,PSMC6,DET1,PSMD6,CSNK1A1,SF3B3,FAF2,BIRC6,PSMC4,WAC,CUL4B,RAB7,PSMA3,RGP1,USP37,RBBP6,NDUFA13,UBE2G2,USP10,PTPN2…
regulation of mitochondrial translation	GO:0070129	7.88977e-07	6.10294	28	2742	18	21272	MTG2,NSUN3,LRPPRC,MTG1,TSFM,TRUB2,MRPS27,RPUSD4,UQCC2,MALSU1,NSUN4,UQCC1,TRMT10C,ALKBH1,FASTKD3,MPV17L2,NGRN,TACO1
kinetochore organization	GO:0051383	8.48421e-07	6.07139	20	2742	15	21272	SMC2,CENPA,CENPN,SENP6,MIS12,CENPW,CDT1,SMC4,POGZ,CENPH,CENPK,CENPC1,NDC80,CENPE,CENPT
energy derivation by oxidation of organic compounds	GO:0015980	1.00468e-06	5.99797	256	2742	70	21272	PNPT1,SCO2,NDUFA8,NDUFS2,ISCU,DLST,IL6ST,UQCRC1,SDHA,NDUFB9,DNAJC15,COX10,PPP1R2,FXN,NDUFS7,OGDH,NDUFS8,NDUFS1,MYBBP1A,NDUFB8,LDHA,CHCHD4,MYC,FH1,SDHB,AIFM1,MTCH2,CDK1,VCP,NDUFB6,PRELID1,CYCS,BLOC1S1,UQCRB,NDUFV2,UQCRFS1,UQCR10,NDUFA5,POLG2,NDUFA10,PIK3CA,PPP1CB,COA6,HMGB1,MDH2,ATP5D,FLCN,MTFR1,ADSL,UQCRQ,CYC1,ETFDH,DLD,AKT2,OXA1L,NOA1,SDHD,SDHC,PPP1CC,COX7C,MUP6,SOD2,UQCC3,MTOR,PPP1CA,CCNB1,CISD…
anatomical structure homeostasis	GO:0060249	1.12916e-06	5.94724	414	2742	99	21272	VHL,RTEL1,HNRNPU,XRCC3,SMC6,SMC5,STK11,TELO2,TFRC,MRE11A,RAD50,CCT7,CCT2,RAD51D,TCP1,RAD51,APEX1,TEN1,ERCC4,PCNA,ALDOA,EXOSC10,UPF1,XRCC6,DKC1,RIF1,WDR36,DNA2,CCT3,CCT4,SMG1,NAT10,TINF2,CCT5,RAB7,MYC,RPA1,FH1,DCLRE1B,DHX36,HUS1,PRDM14,GNL3L,ANKRD11,NF1,NHP2,RAD51C,ATM,PARN,RECQL4,AURKB,MCRS1,NSMCE2,GNL3,SOD1,RPA2,HNRNPA1,NBN,HNRNPC,PNKP,GAR1,BLM,ATP2B1,CCT8,HSP90AB1,NCDN,TERF1,NOP10,WRAP53,ZSCAN4…
nucleus organization	GO:0006997	1.2145e-06	5.9156	116	2742	41	21272	ZPR1,CHMP6,WDR73,SF1,TARDBP,CHEK1,EMG1,RNF8,AHCTF1,POLR1B,ANKLE2,NUP205,PLK1,USP36,NUP93,NUP107,HMGB2,NOLC1,CDAN1,RPS19,NUP153,WRAP53,TPR,LEMD2,USPL1,NUP155,DCTN1,TMEM201,RRN3,CHMP1A,SUMO1,NUP133,CHMP7,SEH1L,SERBP1,PAFAH1B1,PES1,NDC1,SYCP1,NUP54,NUP98
positive regulation of chromatin organization	GO:1905269	1.2145e-06	5.9156	116	2742	41	21272	L3MBTL2,RNF40,RUVBL2,SIN3A,UBE2N,PIH1D1,RIF1,SETDB1,FAM208A,DNMT1,TRIM28,CTR9,PAF1,BRD4,WDR5,RTF1,EP300,NELFA,CDK9,JARID2,MPHOSPH8,RNF20,ATM,MTF2,SMARCB1,OGT,KAT7,BRCA1,KDM1A,WDR61,TPR,NELFE,NIPBL,EED,SART3,PAXIP1,MORC2A,ATF7IP,CCNB1,TADA2A,ING2
RNA methylation	GO:0001510	1.24489e-06	5.90487	74	2742	31	21272	HSD17B10,METTL14,CMTR1,TFB1M,NSUN3,TRMT61A,GTPBP3,DIMT1,EMG1,TRMT112,TRMT5,FTSJ3,GM10767,TFB2M,NSUN4,METTL16,WTAP,TRMT10C,CMTR2,NSUN2,FAM103A1,RNMT,ZC3H13,FBL,TRMT6,NSUN5,RBM15,TGS1,METTL15,MEPCE,METTL3
RNA 5'-end processing	GO:0000966	1.48629e-06	5.8279	18	2742	14	21272	HSD17B10,PNPT1,POP4,SSB,RPP38,RPP30,ABT1,RPP21,RPP14,POP5,POP7,THG1L,POP1,TRMT10C
histone lysine methylation	GO:0034968	1.63852e-06	5.78555	117	2742	41	21272	WDR82,SETD5,PIH1D1,PWP1,RIF1,SETDB1,CXXC1,DNMT1,CTR9,BRD4,KMT2B,FH1,ZFP335,WDR5,RTF1,NELFA,JARID2,SETD2,MTF2,SMARCB1,OGT,BRCA1,KDM1A,WDR61,EZH2,NELFE,EHMT2,EED,SETD1A,RBBP5,PAXIP1,ASH2L,IWS1,BCOR,DPY30,SUPT6,ATRX,EHMT1,SUZ12,KMT2D,NSD1
protein localization to chromatin	GO:0071168	1.6731e-06	5.77648	26	2742	17	21272	RUVBL2,PIH1D1,FAM208A,MCM9,PLK1,SETD2,ESCO2,EZH2,LEMD2,NIPBL,MAU2,CARM1,CDCA5,MSH2,CHMP7,RAD21,MCM8
mitochondrial membrane organization	GO:0007006	1.73237e-06	5.76136	104	2742	38	21272	TMEM11,TIMM10,TIMM50,LETM1,HSPA4,TOMM22,OPA1,MFN2,DNAJC11,MFN1,COX18,STAT3,MYC,NDUFA13,ROMO1,MTCH2,TIMM9,HK2,PEX5,SAMM50,TOMM40,TIMM13,MUL1,BCL2L1,OXA1L,OMA1,TIMM22,TOMM20,AP3B1,AGK,SLC9A1,UQCC3,SIVA1,CLN8,BLOC1S2,CHCHD3,SLC25A5,PDCD5
chromatin organization involved in regulation of transcription	GO:0034401	1.76516e-06	5.75322	140	2742	46	21272	HIST1H2AE,HIST1H2AN,POU5F1,HDAC1,SIN3A,CHEK1,RIF1,SETDB1,SMARCA4,FAM208A,DNMT1,TRIM28,H2AFZ,HIST1H2AB,ZMIZ2,MORF4L2,PPM1D,HIST2H2AA2,MPHOSPH8,ELOF1,SMARCA5,HAT1,KDM1A,HIST1H2AI,EZH2,TPR,HELLS,NAA40,HIST2H2AA1,EED,HIST2H2AC,SETD1A,PHF8,HIST1H2AH,CDC45,ASH2L,ATAD2,MORC2A,HIST1H2AK,ATF7IP,H2AFX,H2AFJ,NRDE2,KMT2D,ZMIZ1,HIRA
positive regulation of DNA-templated transcription, elongation	GO:0032786	1.80952e-06	5.74244	32	2742	19	21272	ELL,GTF2F1,THOC1,CDC73,CTR9,PAF1,BRD4,SUPT5,RTF1,CDK9,EAPP,THOC5,KAT7,WDR61,SUPT4A,GTF2F2,SUPT6,CCNT2,CCNT1
positive regulation of chromosome segregation	GO:0051984	1.80952e-06	5.74244	32	2742	19	21272	FEN1,HNRNPU,SMC6,SMC5,ANAPC11,CUL3,CDC16,DDX11,CDT1,NUMA1,CDC27,AURKB,NSMCE2,BECN1,ANAPC4,NIPBL,RAD21,CCNB1,ANAPC5
cellular response to radiation	GO:0071478	1.95156e-06	5.70962	164	2742	51	21272	RAD9A,STK11,TRIAP1,RUVBL2,RAD51,SDE2,ERCC4,PCNA,PARP1,ATR,CHEK1,XRCC6,LIG4,DDB1,RAD1,ECT2,FIGNL1,GRB2,CUL4B,DHX36,HUS1,EIF2S1,MTCH2,POLD1,EP300,ATM,AURKB,ACTR5,RPL26,BLM,INO80,KDM1A,INTS7,DNM2,NPM1,NIPBL,XRCC5,BCL2L1,AKT2,NAMPT,MDM2,GTF2H5,HSPA5,YY1,H2AFX,MAPK14,N4BP1,RNF168,METTL3,CDC25A,FBXW7
peptidyl-amino acid modification	GO:0018193	2.06728e-06	5.6846	1241	2742	233	21272	HMBS,OXSR1,VRK1,GLRX5,NDUFAF7,DOHH,WDR82,PRMT5,DPH5,CHMP6,KAT8,DR1,PPIL2,TXN1,L3MBTL2,PRMT1,MOCS3,TFRC,DPH6,DPH2,HDAC1,DPH3,CTCF,VPS25,GTF2B,RUVBL2,IL6ST,SETD5,LIAS,NCOA3,JMJD6,PPIH,SIN3A,TADA1,PARP1,ATR,PIH1D1,RICTOR,CHEK1,POLE3,PWP1,UBA2,RIF1,PDCL3,SETDB1,YEATS4,SMARCA4,DHPS,CXXC1,PPIE,KAT5,SENP6,SMG1,GTF3C4,DNMT1,CSNK2B,NCAPG2,TRIM28,PPIL4,CTR9,CSNK1A1,MEAF6,BRD4,LIPT1,KMT2B,KANSL3,MASTL,CHCHD…
ncRNA 5'-end processing	GO:0034471	2.41143e-06	5.61773	16	2742	13	21272	HSD17B10,POP4,SSB,RPP38,RPP30,ABT1,RPP21,RPP14,POP5,POP7,THG1L,POP1,TRMT10C
regulation of catabolic process	GO:0009894	2.55164e-06	5.59318	850	2742	171	21272	PNPT1,NSF,METTL14,PPP2CA,VHL,CHMP6,KAT8,DDX49,EIF6,HNRNPU,CDC37,STK11,PSMD14,LRPPRC,VDAC1,SMARCC1,RNF40,RBX1,MFN2,APEX1,PCID2,PABPC1,SNF8,ERCC4,TARDBP,ARIH1,MDM4,PGAM1,UPF1,DKC1,PSMD2,PDCL3,DNM1L,VPS11,RPL5,DDB1,FASTKD1,PAM16,KAT5,HUWE1,PSMC1,STAT3,KEAP1,TRIM71,PHB,PSMD3,UQCC2,DET1,CSNK1A1,SF3B3,SUPV3L1,PSMC4,WAC,CUL4B,RAB7,RRAGC,MYC,RGP1,NDUFA13,DHX36,AIFM1,UBE2G2,MTCH2,USP10,SUPT5,RPL11,SUMO2,V…
positive regulation of DNA-directed DNA polymerase activity	GO:1900264	2.97252e-06	5.52687	10	2742	10	21272	RFC2,PCNA,RFC5,RFC4,RFC3,CHTF18,CHTF8,DSCC1,POLG2,NPM1
regulation of establishment of protein localization to telomere	GO:0070203	2.97252e-06	5.52687	10	2742	10	21272	CCT7,CCT2,TCP1,DKC1,CCT3,CCT4,CCT5,CCT8,TERF1,WRAP53
regulation of DNA-directed DNA polymerase activity	GO:1900262	2.97252e-06	5.52687	10	2742	10	21272	RFC2,PCNA,RFC5,RFC4,RFC3,CHTF18,CHTF8,DSCC1,POLG2,NPM1
regulation of protein localization to chromosome, telomeric region	GO:1904814	3.46927e-06	5.45976	14	2742	12	21272	CCT7,CCT2,TCP1,DKC1,CCT3,CCT4,CCT5,GNL3L,GNL3,CCT8,TERF1,WRAP53
RNA surveillance	GO:0071025	3.46927e-06	5.45976	14	2742	12	21272	PCID2,PELO,EXOSC10,EXOSC3,EXOSC2,SUPV3L1,EXOSC5,EXOSC8,EXOSC7,PRPF18,EXOSC4,XRN1
RNA polymerase II preinitiation complex assembly	GO:0051123	3.50512e-06	5.4553	24	2742	16	21272	DR1,GTF2B,PSMC5,TBP,PSMC6,PSMC4,GTF2A2,CAND1,PSMC2,TAF6,PSMC3,TAF7,TAF6L,GTF2F2,TAF11,ATF7IP
negative regulation of telomere maintenance via telomere lengthening	GO:1904357	3.97239e-06	5.40095	27	2742	17	21272	HNRNPU,TEN1,ERCC4,EXOSC10,NAT10,TINF2,GNL3L,MCRS1,HNRNPA1,HNRNPC,TERF1,PINX1,CTC1,DCP2,TERF2,SLX4,ACD
regulation of cellular component organization	GO:0051128	4.03118e-06	5.39457	2446	2742	411	21272	FDPS,NSF,CLTC,FEN1,VHL,DR1,L3MBTL2,DDX49,RTEL1,HNRNPU,XRCC3,DUT,SMC5,G6PDX,CDC37,POU5F1,STK11,DNAJC2,ATAD3A,TFRC,MRE11A,NCBP1,NUBP1,VDAC1,DHX33,TRIAP1,CCT7,RNF40,CTCF,DDX3X,RUVBL2,ACTR3,ZW10,ARF1,OPA1,MCM2,TUBB5,CCT2,MFN2,SSBP1,TCP1,BIRC5,TEN1,SETD5,PCID2,RCC1,NAPA,ACTR2,MFN1,SF3A2,TBCD,ERCC4,ARPC4,KIDINS220,ARPC2,TOP2A,ANAPC1,ANAPC11,SIN3A,ACSL4,HNRNPK,EXOSC10,PARP1,UBE2N,ATR,DNAJC15,PIH1D1,RICT…
positive regulation of protein localization to chromosome, telomeric region	GO:1904816	4.04368e-06	5.39322	12	2742	11	21272	CCT7,CCT2,TCP1,DKC1,CCT3,CCT4,CCT5,GNL3L,GNL3,CCT8,WRAP53
regulation of histone methylation	GO:0031060	4.04669e-06	5.3929	77	2742	31	21272	L3MBTL2,CTCF,PIH1D1,RIF1,DNMT1,CTR9,PAF1,BRD4,KMT2B,FH1,ZFP335,WDR5,RTF1,NELFA,JARID2,RNF20,MTF2,SMARCB1,OGT,BRCA1,KDM1A,WDR61,NELFE,EHMT2,EED,PAXIP1,IWS1,BCOR,SUPT6,ATRX,NSD1
establishment of organelle localization	GO:0051656	4.54718e-06	5.34226	379	2742	91	21272	BCCIP,CHMP6,EIF6,HNRNPU,YKT6,CENPA,ACTR3,ZW10,ARF1,BIRC5,ACTR2,KIF2C,ABCE1,NUP88,RAN,INCENP,RRS1,CUL3,SDAD1,KIF18A,MIS12,RAB7,LSG1,KIF23,CDC23,SEC16A,CDT1,SNAP23,NUMA1,NMD3,NUDC,KPNB1,PLK1,BLOC1S1,XPO1,CHAMP1,PREB,DCTN2,DYNLT1F,ATM,SPDL1,AURKB,DYNC1H1,DYNLT1B,RPS15,BECN1,MCPH1,COPG1,GBF1,TERF1,DNM2,NPM1,SPAG5,MAD2L1,KATNB1,PCM1,MAD1L1,CENPC1,DCTN1,TMEM201,RABGEF1,DYNLT1A,BLOC1S4,PINX1,ITGB1,CHMP1…
embryo development ending in birth or egg hatching	GO:0009792	4.66375e-06	5.33126	776	2742	158	21272	PRPF19,ZPR1,SCO2,SBDS,PRMT1,POU5F1,RTCB,COPS3,PITPNB,MED12,NDUFA2,OPA1,CMIP,MFN2,ELL,PELO,GPI1,KIDINS220,LIAS,SRSF1,SIN3A,ACSL4,ERCC2,RICTOR,CHEK1,NLE1,EMG1,SMARCA4,LIG4,FXN,CNOT3,BTF3,RNASEH2B,RRP7A,CUL3,PFN1,KEAP1,TRIM71,KIF20B,HINFP,NCAPG2,TRIM28,TAF8,CTR9,GRB2,MED21,BRD4,BIRC6,PSMC4,MYC,RARG,RPA1,RBBP6,CHD8,HUS1,ZFP335,SUDS3,BRPF1,EIF4E2,RTF1,RPL7L1,TGIF1,PRDM14,NUP50,EP300,ANKRD11,ZEB1,MGAT1…
regulation of cell cycle G2/M phase transition	GO:1902749	5.60286e-06	5.25159	99	2742	36	21272	MRE11A,SIN3A,CHEK1,RNASEH2B,BRD4,HUS1,CDK1,TOPBP1,PLK1,RAD51C,ATM,DONSON,AURKB,NBN,CDK4,RAD17,BLM,BRCA1,CDC7,ORC1,BABAM1,NPM1,CDK2,PINX1,PAXIP1,CTC1,RAD51B,RAD21,ZFP830,FBXO5,CCNG1,CCNB1,CDC25A,KIF14,NAE1,ATAD5
proteasome-mediated ubiquitin-dependent protein catabolic process	GO:0043161	5.80405e-06	5.23627	392	2742	93	21272	SKP1A,PSMD14,SMARCC1,RBX1,PSMB6,SPOP,ANAPC1,ARIH1,PSMA1,PSMD2,PSMA6,PSMA5,DDB1,CUL3,KAT5,PSMC5,CDC16,PSMD4,TRIM71,KCTD10,PSMB1,PSMC6,DET1,PSMD6,CSNK1A1,FAF2,WAC,CUL4B,PSMA3,UBE2G2,UBE4B,RPL11,SUMO2,PSMB4,VCP,PSMB7,PLK1,XPO1,UBE2K,UBE2C,PSMD1,USP7,AURKA,GLMN,PSMD8,PSMB3,RYBP,CDC27,OGT,DDA1,ANAPC10,UCHL5,SEC61B,USP5,HSP90AB1,PSMA4,PSMB2,PSMD7,CDC20,ANAPC4,PSMD12,PSMA7,CUL2,CCNF,SYVN1,MDM2,FAM122A,F…
G2/M transition of mitotic cell cycle	GO:0000086	6.03892e-06	5.21904	117	2742	40	21272	MRE11A,KDM8,BIRC5,SIN3A,CHEK1,RNASEH2B,BRD4,MASTL,HUS1,CDK1,TOPBP1,PLK1,PPM1D,RAD51C,ATM,CCNA2,DONSON,AURKB,TAF2,NBN,CDK4,RAD17,BLM,BRCA1,CDC7,ORC1,CDK2,PINX1,CTC1,RAD51B,ARPP19,LATS1,RAD21,ZFP830,FBXO5,CCNG1,CCNB1,CDC25A,KIF14,NAE1
nuclear-transcribed mRNA catabolic process, nonsense-mediated decay	GO:0000184	6.2969e-06	5.20087	37	2742	20	21272	SKIV2L,NCBP1,PABPC1,NCBP2,EXOSC10,UPF1,MAGOH,SMG1,ETF1,EIF3E,EIF4A3,RBM8A,GSPT1,SMG7,SMG5,DCP2,UPF2,RNPS1,SMG9,SECISBP2
positive regulation of telomere maintenance via telomere lengthening	GO:1904358	6.2969e-06	5.20087	37	2742	20	21272	RTEL1,CCT7,CCT2,TCP1,DKC1,CCT3,CCT4,CCT5,DHX36,ATM,PARN,AURKB,HNRNPA1,PNKP,CCT8,XRCC5,NEK2,NAF1,MAPK1,ACD
cell cycle G2/M phase transition	GO:0044839	7.06586e-06	5.15083	136	2742	44	21272	MRE11A,KDM8,BIRC5,SIN3A,CHEK1,RNASEH2B,BRD4,MASTL,HUS1,CDK1,TOPBP1,PLK1,PPM1D,RAD51C,ATM,CCNA2,DONSON,AURKB,TAF2,NBN,CDK4,RAD17,BLM,BRCA1,CDC7,ORC1,BABAM1,NPM1,CDK2,PINX1,PAXIP1,CTC1,RAD51B,ARPP19,LATS1,RAD21,ZFP830,FBXO5,CCNG1,CCNB1,CDC25A,KIF14,NAE1,ATAD5
protein localization to chromosome, centromeric region	GO:0071459	7.22831e-06	5.14096	22	2742	15	21272	CENPA,CTCF,ZW10,BUB3,MIS12,CDT1,CDK1,CHAMP1,SPDL1,AURKB,MTBP,NDC80,IK,TTK,CENPQ
rRNA modification	GO:0000154	8.8922e-06	5.05099	28	2742	17	21272	TFB1M,NSUN3,DIMT1,EMG1,DKC1,TRMT112,FTSJ3,NAT10,TFB2M,NSUN4,NHP2,METTL16,GAR1,NOP10,FBL,NSUN5,METTL15
rRNA-containing ribonucleoprotein complex export from nucleus	GO:0071428	9.02937e-06	5.04434	17	2742	13	21272	EIF6,ABCE1,NUP88,RAN,RRS1,SDAD1,LSG1,NMD3,XPO1,RPS15,NPM1,TSC1,LTV1
protein localization to kinetochore	GO:0034501	9.02937e-06	5.04434	17	2742	13	21272	ZW10,BUB3,MIS12,CDT1,CDK1,CHAMP1,SPDL1,AURKB,MTBP,NDC80,IK,TTK,CENPQ
negative regulation of nucleic acid-templated transcription	GO:1903507	1.1445e-05	4.94139	1356	2742	247	21272	HIST1H2AE,HIST1H2AN,PPP2CA,VHL,KAT8,DR1,TXN1,HNRNPU,DDX5,POU5F1,NR0B1,MAX,NELFB,UXT,HDAC1,SMARCE1,CTCF,ZFP281,RUVBL2,IGBP1,PFDN5,HDAC3,KDM8,NACA,BIRC5,SAP130,QARS,HIST2H3C1,HIST1H3F,PCNA,THAP11,SPOP,SIN3A,HNRNPK,DDX54,MDM4,XRCC6,RPL10,DNAJA3,RIF1,SETDB1,SMARCA4,BAP1,NACC1,CUL3,NELFCD,KAT5,FAM208A,PSMC5,ILF3,NANOG,TFCP2L1,CDC73,RNF8,PHB,DNMT1,HINFP,MYBBP1A,TRIM28,E2F4,SCAI,CTR9,PHB2,UBA3,PAF1,MGA,…
RNA phosphodiester bond hydrolysis, exonucleolytic	GO:0090503	1.16802e-05	4.93255	38	2742	20	21272	PNPT1,REXO2,EXOSC10,DIS3,EXOSC3,EXOSC2,EXOSC8,EXOSC7,CNOT8,TOE1,PARN,PDE12,DIS3L,USB1,CNOT2,CNOT1,DCP2,XRN1,ISG20L2,XRN2
negative regulation of RNA biosynthetic process	GO:1902679	1.22589e-05	4.91155	1357	2742	247	21272	HIST1H2AE,HIST1H2AN,PPP2CA,VHL,KAT8,DR1,TXN1,HNRNPU,DDX5,POU5F1,NR0B1,MAX,NELFB,UXT,HDAC1,SMARCE1,CTCF,ZFP281,RUVBL2,IGBP1,PFDN5,HDAC3,KDM8,NACA,BIRC5,SAP130,QARS,HIST2H3C1,HIST1H3F,PCNA,THAP11,SPOP,SIN3A,HNRNPK,DDX54,MDM4,XRCC6,RPL10,DNAJA3,RIF1,SETDB1,SMARCA4,BAP1,NACC1,CUL3,NELFCD,KAT5,FAM208A,PSMC5,ILF3,NANOG,TFCP2L1,CDC73,RNF8,PHB,DNMT1,HINFP,MYBBP1A,TRIM28,E2F4,SCAI,CTR9,PHB2,UBA3,PAF1,MGA,…
regulation of translational elongation	GO:0006448	1.4597e-05	4.83574	20	2742	14	21272	DPH5,DPH6,DPH2,DPH3,AARS,SRP9,RPL30,USP16,ALKBH1,EIF4A3,DPH1,DNAJC24,EIF5A,SECISBP2
positive regulation of mitotic sister chromatid segregation	GO:0062033	1.4597e-05	4.83574	20	2742	14	21272	HNRNPU,SMC5,ANAPC11,CUL3,CDC16,CDT1,NUMA1,CDC27,AURKB,NSMCE2,BECN1,ANAPC4,NIPBL,ANAPC5
tRNA 5'-end processing	GO:0099116	1.52934e-05	4.8155	15	2742	12	21272	HSD17B10,POP4,SSB,RPP38,RPP30,RPP21,RPP14,POP5,POP7,THG1L,POP1,TRMT10C
attachment of mitotic spindle microtubules to kinetochore	GO:0051315	1.52934e-05	4.8155	15	2742	12	21272	HNRNPU,KIF2C,MIS12,CDT1,CHAMP1,AURKB,BECN1,MAD1L1,CENPC1,NDC80,CENPE,SEH1L
DNA strand elongation	GO:0022616	1.52934e-05	4.8155	15	2742	12	21272	MCM4,MRE11A,POLD2,MCM7,PCNA,DNA2,POLE,DCLRE1B,NBN,GINS1,MCM3,POLA1
establishment of protein localization to telomere	GO:0070200	1.52934e-05	4.8155	15	2742	12	21272	CCT7,CCT2,TCP1,DKC1,CCT3,CCT4,CCT5,CCT8,TERF1,WRAP53,BRCA2,ACD
inner cell mass cell proliferation	GO:0001833	1.52934e-05	4.8155	15	2742	12	21272	PRPF19,ZPR1,SBDS,PELO,CHEK1,NCAPG2,TAF8,BRD4,GINS1,BRCA2,PALB2,GINS4
regulation of mitochondrial gene expression	GO:0062125	1.69274e-05	4.77141	32	2742	18	21272	MTG2,NSUN3,LRPPRC,MTG1,TSFM,TRUB2,MRPS27,RPUSD4,UQCC2,MALSU1,NSUN4,UQCC1,TRMT10C,ALKBH1,FASTKD3,MPV17L2,NGRN,TACO1
regulation of G2/M transition of mitotic cell cycle	GO:0010389	1.73007e-05	4.76194	81	2742	31	21272	MRE11A,SIN3A,CHEK1,RNASEH2B,BRD4,HUS1,CDK1,TOPBP1,RAD51C,ATM,DONSON,AURKB,NBN,CDK4,RAD17,BLM,BRCA1,CDC7,ORC1,CDK2,PINX1,CTC1,RAD51B,RAD21,ZFP830,FBXO5,CCNG1,CCNB1,CDC25A,KIF14,NAE1
establishment of protein localization to chromosome	GO:0070199	1.82911e-05	4.73776	23	2742	15	21272	CCT7,RUVBL2,CCT2,TCP1,PIH1D1,DKC1,CCT3,CCT4,CCT5,CCT8,TERF1,WRAP53,NIPBL,BRCA2,ACD
mitochondrial cytochrome c oxidase assembly	GO:0033617	1.82911e-05	4.73776	23	2742	15	21272	SCO2,PET117,COA5,COX18,COX17,SCO1,COX20,FASTKD3,OXA1L,COA4,COX14,COX19,COX16,PET100,TACO1
protein-containing complex localization	GO:0031503	1.85236e-05	4.73227	246	2742	65	21272	THOC3,MIOS,EIF6,HNRNPU,PABPN1,NCBP1,BIRC5,PCID2,NUP85,ABCE1,RAE1,NUP88,RAN,SRSF3,THOC6,RRS1,SDAD1,THOC1,SSB,EXOC1,LSG1,ENY2,NOL6,SARNP,SNAP23,NMD3,NUP93,NUP107,XPO1,SETD2,NUP214,NUP160,POLR2D,THOC5,GLE1,RPS15,THOC2,POLDIP3,TPR,DNM2,NPM1,MCM3AP,NSUN2,PCM1,NXF1,NUP155,DYNLL1,TSC1,AP2M1,IWS1,MZT1,EIF5A,NUP133,STX4A,SUPT6,TERF2,ATAD1,ALKBH5,RAB8A,SEH1L,SNAPIN,SMAD7,LTV1,NDC1,DDX39
chordate embryonic development	GO:0043009	1.87766e-05	4.72638	760	2742	153	21272	PRPF19,ZPR1,SCO2,SBDS,PRMT1,POU5F1,RTCB,COPS3,PITPNB,MED12,NDUFA2,OPA1,CMIP,MFN2,ELL,PELO,GPI1,KIDINS220,LIAS,SRSF1,SIN3A,ERCC2,CHEK1,NLE1,EMG1,SMARCA4,LIG4,CNOT3,BTF3,RNASEH2B,RRP7A,CUL3,PFN1,KEAP1,TRIM71,KIF20B,HINFP,NCAPG2,TRIM28,TAF8,CTR9,GRB2,MED21,BRD4,BIRC6,PSMC4,MYC,RARG,RPA1,RBBP6,CHD8,ZFP335,SUDS3,BRPF1,EIF4E2,RTF1,RPL7L1,TGIF1,PRDM14,NUP50,EP300,ANKRD11,ZEB1,MGAT1,ACTL6A,DHX35,NF1,SETD…
DNA replication-independent nucleosome assembly	GO:0006336	1.88993e-05	4.72355	29	2742	17	21272	RBBP4,HIST1H4H,HIST1H4N,IPO4,HIST1H4M,HIST1H4B,HIST1H4A,HIST1H4F,HAT1,HIST1H4J,OIP5,HIST1H4K,HIST1H4D,CENPP,ATRX,HIST1H4C,HIRA
DNA replication-independent nucleosome organization	GO:0034724	1.88993e-05	4.72355	29	2742	17	21272	RBBP4,HIST1H4H,HIST1H4N,IPO4,HIST1H4M,HIST1H4B,HIST1H4A,HIST1H4F,HAT1,HIST1H4J,OIP5,HIST1H4K,HIST1H4D,CENPP,ATRX,HIST1H4C,HIRA
protein monoubiquitination	GO:0006513	1.93626e-05	4.71304	73	2742	29	21272	FANCL,SKP1A,RNF40,RBX1,DDB1,CUL3,HUWE1,CDC73,CTR9,PAF1,WAC,CUL4B,PEX12,UBE4B,UHRF1,RNF20,RYBP,FANCM,ATXN7L3,ZFP598,TSG101,WDR48,BCOR,UBE2T,PCGF6,CUL1,TOPORS,RNF168,CBL
protein folding	GO:0006457	2.18013e-05	4.66152	155	2742	47	21272	TBCA,PPIL2,PDRG1,CDC37,CCT7,HSPA14,HSPA9,PFDN5,CCT2,TCP1,TBCD,PPIH,TBCC,DNAJA3,PDCL3,PPIE,PFDN6,CCT3,CCT4,NUDCD3,HSPE1,VBP1,GRPEL1,CCT5,CHCHD4,UBE4B,NUDC,HSPD1,DNAJA2,CCT8,HSP90AB1,PPIL1,PFDN1,PFDN2,CHORDC1,HSPA8,DNAJA1,PFDN4,HSPA5,NUDCD2,FKBP1A,DNAJB6,DNLZ,PPIL3,PPIG,UNC45A,PDCD5
positive regulation of establishment of protein localization to telomere	GO:1904851	2.31265e-05	4.63589	9	2742	9	21272	CCT7,CCT2,TCP1,DKC1,CCT3,CCT4,CCT5,CCT8,WRAP53
DNA strand elongation involved in DNA replication	GO:0006271	2.31265e-05	4.63589	9	2742	9	21272	MCM4,POLD2,MCM7,PCNA,DNA2,POLE,GINS1,MCM3,POLA1
telomere maintenance via recombination	GO:0000722	2.31918e-05	4.63467	13	2742	11	21272	XRCC3,SMC6,SMC5,RAD51D,RAD51,ERCC4,RAD51C,NSMCE2,XRCC1,BRCA2,TERF2
mitochondrial ATP synthesis coupled proton transport	GO:0042776	2.86414e-05	4.54301	18	2742	13	21272	ATP5A1,STOML2,ATP5H,ATP5B,ATP5C1,ATP5J2,ATP5K,ATP5O,ATP5J,ATP5L,ATP5D,CYC1,ATP5E
endonucleolytic cleavage involved in rRNA processing	GO:0000478	2.88783e-05	4.53943	11	2742	10	21272	BOP1,RRS1,ABT1,BMS1,UTP23,RPS21,FCF1,NPM1,RCL1,TSR1
regulation of establishment of protein localization to chromosome	GO:0070202	2.88783e-05	4.53943	11	2742	10	21272	CCT7,CCT2,TCP1,DKC1,CCT3,CCT4,CCT5,CCT8,TERF1,WRAP53
double-strand break repair via break-induced replication	GO:0000727	2.88783e-05	4.53943	11	2742	10	21272	MCM4,GINS2,MCM2,MCM7,MCM6,CDC7,MCM5,CDC45,MCM3,GINS4
endonucleolytic cleavage of tricistronic rRNA transcript (SSU-rRNA, 5.8S rRNA, LSU-rRNA)	GO:0000479	2.88783e-05	4.53943	11	2742	10	21272	BOP1,RRS1,ABT1,BMS1,UTP23,RPS21,FCF1,NPM1,RCL1,TSR1
response to radiation	GO:0009314	2.98606e-05	4.5249	439	2742	99	21272	RAD9A,TXN1,STK11,TRIAP1,REV1,RUVBL2,RAD51,SDE2,INTS3,ERCC4,PCNA,ERCC2,PARP1,ATR,CHEK1,XRCC6,RFWD3,HMGCS1,DYNLRB1,CDS2,LIG4,RRM1,DDB1,KAT5,KARS,POLG,RNF8,RAD1,GNB1,ECT2,FIGNL1,GRB2,CUL4B,MYC,DHX36,HUS1,EIF2S1,MTCH2,POLD1,UBE4B,ERCC3,TIPIN,TOPBP1,EP300,NF1,ATM,PPP1CB,SPRTN,AURKB,ACTR5,RPL26,XRCC2,POLB,FANCD2,RAD54L,BLM,BRCA1,FANCG,INO80,KDM1A,INTS7,SMC1A,DNM2,BABAM1,XRCC4,NPM1,MSH6,NIPBL,BRAT1,XRCC…
nitrogen compound transport	GO:0071705	3.3198e-05	4.47889	2231	2742	374	21272	PNPT1,NSF,VPS29,ZPR1,GOLT1B,PPP2CA,CLTC,VHL,IPO13,CHMP6,THOC3,TXN1,EXOC7,EIF6,HNRNPU,TIMM17A,TIMM10,PGRMC2,TIMM50,PABPN1,NUP43,YKT6,IPO7,HSPA4,TFRC,NCBP1,HDAC1,LRPPRC,SRP72,DPH3,TOMM22,VPS25,ACTR3,HSPA9,ZW10,ARF1,HDAC3,MFN2,TCP1,MTX2,MBTPS1,ACTB,NACA,BIRC5,PCID2,TNPO3,NAPA,NUP85,GPI1,NCBP2,SNF8,TARDBP,POLA2,GOSR2,ARPC2,SRSF1,ABCE1,NXT1,ACSL4,RBM22,DNAJC15,RAE1,NUP88,COG4,RAN,SEC61A1,DNM1L,ARFRP1,…
negative regulation of transcription, DNA-templated	GO:0045892	3.55351e-05	4.44934	1320	2742	239	21272	HIST1H2AE,HIST1H2AN,PPP2CA,VHL,KAT8,DR1,TXN1,HNRNPU,DDX5,POU5F1,NR0B1,MAX,NELFB,UXT,HDAC1,SMARCE1,CTCF,ZFP281,IGBP1,PFDN5,HDAC3,KDM8,NACA,BIRC5,SAP130,QARS,HIST2H3C1,HIST1H3F,PCNA,THAP11,SPOP,SIN3A,HNRNPK,MDM4,XRCC6,RPL10,DNAJA3,RIF1,SETDB1,SMARCA4,BAP1,NACC1,CUL3,NELFCD,KAT5,FAM208A,PSMC5,ILF3,NANOG,TFCP2L1,CDC73,RNF8,PHB,DNMT1,HINFP,MYBBP1A,TRIM28,E2F4,CTR9,PHB2,UBA3,PAF1,MGA,BCLAF1,MYC,RARG,TI…
rRNA transcription	GO:0009303	3.83591e-05	4.41613	30	2742	17	21272	GTF3C1,PIH1D1,PWP1,SMARCA4,DDX11,POLR1B,SMARCB1,MARS,NCL,CD3EAP,POLR1A,NPM1,TOP1,TAF1B,SPIN1,MTOR,POLR1E
rRNA catabolic process	GO:0016075	3.85644e-05	4.41381	21	2742	14	21272	DDX49,PELO,EXOSC10,DIS3,EXOSC3,EXOSC2,EXOSC5,EXOSC8,EXOSC7,DROSHA,DICER1,EXOSC4,DIS3L,XRN1
mitotic recombination	GO:0006312	3.85644e-05	4.41381	21	2742	14	21272	XRCC3,SMC6,SMC5,RAD51D,RAD51,ERCC4,ERCC2,RAD51C,NSMCE2,BLM,ZSCAN4C,XRCC1,BRCA2,TERF2
positive regulation of response to DNA damage stimulus	GO:2001022	3.88321e-05	4.41081	110	2742	37	21272	RAD9A,DDX5,ACTR2,PCNA,MMS19,PARP1,UBE2N,ATR,RIF1,RNF8,TRIM28,DDX11,BCLAF1,MYC,TIMELESS,FH1,MTCH2,NSMCE1,RPS3,ATM,RPL26,NSMCE4A,PNKP,PIAS4,BLM,BRCA1,WRAP53,BABAM1,EEF1E1,FUS,PRKDC,PAXIP1,PRKCD,XRCC1,ARID2,PARG,RNF168
regulation of cellular catabolic process	GO:0031329	3.90578e-05	4.40829	706	2742	143	21272	PNPT1,METTL14,KAT8,DDX49,HNRNPU,CDC37,STK11,PSMD14,LRPPRC,VDAC1,SMARCC1,RNF40,RBX1,MFN2,APEX1,PCID2,PABPC1,ERCC4,TARDBP,ARIH1,PGAM1,UPF1,DKC1,PDCL3,DNM1L,VPS11,RPL5,FASTKD1,PAM16,KAT5,HUWE1,PSMC1,STAT3,KEAP1,TRIM71,UQCC2,DET1,CSNK1A1,SUPV3L1,PSMC4,WAC,RRAGC,MYC,RGP1,DHX36,AIFM1,UBE2G2,USP10,SUPT5,RPL11,SUMO2,VCP,SCFD1,PIK3R2,VPS13D,RRAGA,PLK1,USP36,CNOT8,XPO1,UBE2K,SCO1,POLDIP2,METTL16,TOMM7,ATM,…
establishment of protein localization to mitochondrial membrane	GO:0090151	4.23148e-05	4.37351	27	2742	16	21272	TIMM10,HSPA4,TOMM22,COX18,NDUFA13,ROMO1,MTCH2,TIMM9,SAMM50,TOMM40,TIMM13,OXA1L,TIMM22,AP3B1,AGK,PDCD5
mitotic sister chromatid cohesion	GO:0007064	4.29343e-05	4.3672	24	2742	15	21272	SMC5,CHTF8,PDS5B,DSCC1,POGZ,NSMCE2,NAA50,NAA10,SMC1A,CDC20,NIPBL,MAU2,PDS5A,CDCA5,ATRX
proteasomal protein catabolic process	GO:0010498	4.53479e-05	4.34344	460	2742	102	21272	PRPF19,VHL,SKP1A,PSMD14,SMARCC1,RNF40,RBX1,PSMB6,SPOP,ANAPC1,ARIH1,PSMA1,PSMD2,PSMA6,PSMA5,DDB1,CUL3,KAT5,PSMC5,PSMC1,CDC16,PSMD4,TRIM71,KCTD10,PSMB1,PSMC6,DET1,PSMD6,CSNK1A1,FAF2,PSMC4,WAC,CUL4B,PSMA3,UBE2G2,UBE4B,RPL11,SUMO2,PSMB4,VCP,PSMB7,PLK1,XPO1,UBE2K,UBE2C,SCO1,DDI2,PSMD1,USP7,AURKA,GLMN,PSMD8,PSMB3,RYBP,CDC27,OGT,DDA1,PSMC2,ANAPC10,UCHL5,SEC61B,USP5,HSP90AB1,PSMA4,PSMB2,PSMD7,CDC20,ANAPC…
ncRNA catabolic process	GO:0034661	4.82782e-05	4.31625	37	2742	19	21272	PNPT1,DDX49,PELO,EXOSC10,DIS3,EXOSC3,EXOSC2,EXOSC5,EXOSC8,EXOSC7,DROSHA,PARN,POP1,DICER1,EXOSC4,NSUN2,DIS3L,SND1,XRN1
establishment of mitotic spindle localization	GO:0040001	4.82782e-05	4.31625	37	2742	19	21272	BCCIP,CENPA,ZW10,NUMA1,KPNB1,PLK1,DYNLT1F,SPDL1,DYNLT1B,MCPH1,MAD2L1,DCTN1,DYNLT1A,ITGB1,NDC80,ACTR10,ACTR1A,ACTR1B,PAFAH1B1
ribosome localization	GO:0033750	5.39393e-05	4.2681	16	2742	12	21272	EIF6,ABCE1,NUP88,RAN,RRS1,SDAD1,LSG1,NMD3,XPO1,RPS15,NPM1,LTV1
ribosomal subunit export from nucleus	GO:0000054	5.39393e-05	4.2681	16	2742	12	21272	EIF6,ABCE1,NUP88,RAN,RRS1,SDAD1,LSG1,NMD3,XPO1,RPS15,NPM1,LTV1
spindle localization	GO:0051653	6.06951e-05	4.21685	52	2742	23	21272	BCCIP,CENPA,ACTR3,ZW10,ACTR2,NUMA1,KPNB1,PLK1,DYNLT1F,SPDL1,DYNC1H1,DYNLT1B,MCPH1,SPAG5,MAD2L1,DCTN1,DYNLT1A,ITGB1,NDC80,ACTR10,ACTR1A,ACTR1B,PAFAH1B1
establishment of mitotic spindle orientation	GO:0000132	6.11768e-05	4.21341	34	2742	18	21272	BCCIP,CENPA,ZW10,NUMA1,PLK1,DYNLT1F,SPDL1,DYNLT1B,MCPH1,MAD2L1,DCTN1,DYNLT1A,ITGB1,NDC80,ACTR10,ACTR1A,ACTR1B,PAFAH1B1
positive regulation of cellular protein localization	GO:1903829	6.28212e-05	4.20189	308	2742	75	21272	ZPR1,STK11,TFRC,CCT7,ACTR3,HDAC3,CCT2,TCP1,TARDBP,ARPC2,RBM22,HNRNPK,PARP1,DKC1,RAN,CCT3,CCT4,KIF20B,TRIM28,ECT2,CCT5,NUTF2,SEC16A,CDT1,CDK1,NUMA1,NMD3,PIK3R2,GNL3L,EP300,DMAP1,TOMM7,ANP32B,OGT,MCRS1,GNL3,KAT7,IPO5,CCT8,BRCA1,HSP90AB1,TSG101,WRAP53,RER1,TPR,IQGAP1,NPM1,PCM1,NIPBL,AKT2,DCTN1,MDM2,PINX1,ARF6,ITGB1,CDH1,PRKCD,NDC80,MAPK1,XPO4,NUP62,UBR5,ICE1,STX4A,B3GAT3,TMEM30A,MAPK14,CDC42,APC,CLI…
regulation of intracellular protein transport	GO:0033157	6.43816e-05	4.19124	232	2742	61	21272	ZPR1,PPP2CA,TXN1,ACTR3,HDAC3,TARDBP,ARPC2,RBM22,RAN,KIF20B,TRIM28,ECT2,CHCHD4,NUTF2,UBE2G2,SEC16A,CDK1,PIK3R2,EP300,RANGAP1,XPO1,NF1,SETD2,DMAP1,TOMM7,ANP32B,NOLC1,OGT,NUPL1,THOC2,IPO5,BRCA1,HSP90AB1,BARD1,TPR,NSUN2,PCM1,PTPN11,AKT2,DCTN1,MDM2,CDH1,PRKCD,IWS1,MAPK1,XPO4,NUP62,PARL,UBR5,ICE1,SUPT6,B3GAT3,TMEM30A,XPO5,MAPK14,CDC42,NUP54,FBXW7,PCNT,MFF,PDCD5
histone H3 acetylation	GO:0043966	6.56507e-05	4.18276	64	2742	26	21272	DR1,SIN3A,TADA1,PIH1D1,CHEK1,POLE3,SMARCA4,MEAF6,BRD4,BRPF1,WDR5,EP300,SMARCB1,KAT7,BRCA1,MCM3AP,TAF6L,MBIP,BRCA2,ING5,ING4,YEATS2,TADA3,TAF5L,SUPT3,TADA2A
peptidyl-lysine methylation	GO:0018022	7.00358e-05	4.15468	131	2742	41	21272	WDR82,SETD5,PIH1D1,PWP1,RIF1,SETDB1,CXXC1,DNMT1,CTR9,BRD4,KMT2B,FH1,ZFP335,WDR5,RTF1,NELFA,JARID2,SETD2,MTF2,SMARCB1,OGT,BRCA1,KDM1A,WDR61,EZH2,NELFE,EHMT2,EED,SETD1A,RBBP5,PAXIP1,ASH2L,IWS1,BCOR,DPY30,SUPT6,ATRX,EHMT1,SUZ12,KMT2D,NSD1
meiotic cell cycle process	GO:1903046	7.49929e-05	4.12498	191	2742	53	21272	PPP2R1A,SMC2,MRE11A,FANCA,ACTR3,RAD51D,RAD51,ACTR2,ERCC4,TOP2A,TUBG1,INCENP,KIF18A,RAD1,FIGNL1,MASTL,HUS1,NCAPH2,SMC4,TOPBP1,PRKAR1A,PLK1,RAD51C,ATM,AURKA,FANCM,FANCD2,PSMD13,RAD54L,TERF1,CDC20,NSUN2,MSH6,ESPL1,TRIP13,EHMT2,CENPC1,SPIN1,DAZL,CCNE1,NCAPD3,CKS2,BRIP1,TTK,BRCA2,ATRX,NCAPH,FBXO5,CDC25A,NDC1,SYCP1,SLX4,ING2
snRNA 3'-end processing	GO:0034472	7.99229e-05	4.09733	19	2742	13	21272	EXOSC3,INTS8,TUT1,EXOSC2,EXOSC5,EXOSC8,EXOSC7,INTS5,INTS6,TOE1,EXOSC4,USB1,INTS1
regulation of protein ubiquitination	GO:0031396	8.15678e-05	4.08848	207	2742	56	21272	RNF40,DDX3X,RBX1,UBE2N,DNAJA3,DNM1L,RPL5,CUL3,HUWE1,RPS2,CTR9,GTPBP4,MASTL,U2AF2,RPL11,RPS3,GNL3L,PLK1,DAXX,CDK9,RNF20,GLMN,FANCM,SPRTN,OGT,OTUB1,PHF23,BRCA1,HSP90AB1,KDM1A,CDC20,NPM1,MAD2L1,MTBP,WDR48,RPS7,DNAJA1,PINX1,CAML,PAXIP1,RPL23,HSPA5,SENP2,UBR5,UBE3A,FKBP1A,MTOR,FBXO5,HERPUD1,TOPORS,N4BP1,UBE2S,SMAD7,DERL1,FBXW7,PRMT3
negative regulation of RNA splicing	GO:0033119	8.68783e-05	4.06109	28	2742	16	21272	HNRNPK,SFSWAP,SRSF7,HNRNPL,PTBP1,U2AF2,TRA2B,RPS26,RPS13,SRSF10,NPM1,AKT2,DYRK1A,RNPS1,SRSF6,RBM10
negative regulation of DNA replication	GO:0008156	8.68783e-05	4.06109	28	2742	16	21272	LIG3,ATR,GTPBP4,TIMELESS,HUS1,TIPIN,TTF1,DONSON,CDAN1,RAD17,TERF1,PDS5A,BRCA2,GMNN,ZFP830,FBXO5
regulation of translational fidelity	GO:0006450	9.34026e-05	4.02964	22	2742	14	21272	EIF2S3X,IARS,AARS2,HSPA14,LARS,VARS2,AARS,VARS,IARS2,RPS9,RPS5,LARS2,TARS2,YRDC
positive regulation of transcription by RNA polymerase I	GO:0045943	9.34026e-05	4.02964	22	2742	14	21272	DHX33,UTP15,PIH1D1,PWP1,SMARCA4,WDR75,DDX11,WDR43,SMARCB1,MARS,NCL,HEATR1,PHF8,MTOR
negative regulation of telomere maintenance via telomerase	GO:0032211	9.34026e-05	4.02964	22	2742	14	21272	HNRNPU,TEN1,EXOSC10,NAT10,TINF2,GNL3L,HNRNPA1,HNRNPC,TERF1,PINX1,CTC1,DCP2,TERF2,ACD
catabolic process	GO:0009056	9.60748e-05	4.01739	2342	2742	387	21272	PNPT1,PRPF19,NSF,METTL14,ZPR1,UBA1,PPP2CA,CLTC,FEN1,VHL,CHMP6,KAT8,SKIV2L,DDX49,EIF6,HNRNPU,DUT,DDX5,CLPP,CDC37,STK11,COPS3,SKP1A,PSMD14,NCBP1,ITPA,LRPPRC,VDAC1,NEDD8,SMARCC1,RNF40,VPS25,DLST,RBX1,MFN2,APEX1,PSMB6,PCID2,PELO,PABPC1,MRTO4,GPI1,NCBP2,SNF8,ERCC4,TARDBP,SPOP,ALDOA,ANAPC1,LSM2,RNASEH2A,ANAPC11,LSM7,EXOSC10,UBE2N,ARIH1,MDM4,PGAM1,UPF1,PGK1,DKC1,PSMA1,PSMD2,DIS3,EXOSC3,PDCL3,PSMA6,DNM1L…
mitotic spindle assembly	GO:0090307	9.81697e-05	4.00802	61	2742	25	21272	CLTC,BCCIP,HNRNPU,RACGAP1,BIRC5,RCC1,SMC3,KIF11,KIF23,MYBL2,TPX2,KPNB1,PLK1,AURKB,DRG1,SMC1A,CDC20,TPR,ZFP207,CEP192,NEK2,CHMP1A,MZT1,KIF4,STAG2
G1/S transition of mitotic cell cycle	GO:0000082	9.90956e-05	4.00395	172	2742	49	21272	ZPR1,DDX3X,APEX1,RCC1,LSM11,DBF4,RFWD3,LSM10,CDC73,TRIM71,MNAT1,HINFP,POLE,E2F4,ECD,BRD4,CUL4B,USP37,RPTOR,RPS6,ANP32B,ANKRD17,RPL26,RPA2,RBBP8,CDK4,INO80,TFDP1,EZH2,EIF4E,CDK2,E2F6,MTBP,PRKDC,GIGYF2,MDM2,PHF8,CDC45,ITGB1,CCNE1,SENP2,LATS1,KLF4,CCND3,MEPCE,CDC25A,KIF14,RPS6KB1,CACUL1
base-excision repair	GO:0006284	0.000106573	3.97235	42	2742	20	21272	FEN1,LIG3,APEX1,PCNA,DNA2,HUWE1,POLG,LIG1,POLE,RPA1,POLD1,RPS3,TDG,HMGB1,RPA2,POLB,POLQ,RPA3,APEX2,XRCC1
positive regulation of mRNA metabolic process	GO:1903313	0.000107704	3.96777	91	2742	32	21272	PNPT1,PRPF19,METTL14,NCBP1,SF3B4,PABPC1,NCBP2,TARDBP,UPF1,CDC73,NUDT21,TRIM71,PAF1,DHX36,TRA2B,CNOT8,METTL16,SNRNP70,POLR2G,NCL,ZFP36L1,EIF4A3,HSPA8,GIGYF2,KHSRP,DAZAP1,CNOT1,THRAP3,CIRBP,FTO,CCNB1,NUP98
meiotic cell cycle	GO:0051321	0.000124863	3.90357	341	2742	80	21272	PPP2R1A,PPP2CA,SMC2,MRE11A,FANCA,ACTR3,RAD51D,RAD51,ACTR2,ERCC4,TOP2A,BUB3,TUBG1,SMC3,INCENP,KIF18A,RAD1,TUBGCP5,FIGNL1,MASTL,RPA1,HUS1,NCAPH2,SMC4,NUMA1,TOPBP1,PRKAR1A,PLK1,TUBGCP4,RAD51C,ATM,AURKA,FANCM,TUBGCP2,RBBP8,FANCD2,NBN,PSMD13,RAD54L,TERF1,SMC1A,CDC20,EXO1,NSUN2,MSH6,CDK2,ESPL1,TRIP13,TUBGCP3,EHMT2,CENPC1,SPIN1,NEK2,DAZL,GM14632,CCNE1,NCAPD3,CKS2,BRIP1,TTK,BRCA2,RAD21,XLR4A,ATRX,H2AFX,S…
cell cycle G1/S phase transition	GO:0044843	0.00013213	3.879	194	2742	53	21272	ZPR1,DDX3X,APEX1,RCC1,LSM11,DBF4,RFWD3,LSM10,CDC73,TRIM71,MNAT1,HINFP,POLE,E2F4,PHB2,PAF1,ECD,BRD4,CUL4B,USP37,RPTOR,RPS6,CCNA2,ANP32B,ANKRD17,RPL26,RPA2,RBBP8,CDK4,INO80,TFDP1,EZH2,EIF4E,CDK2,E2F6,MTBP,PRKDC,GIGYF2,MDM2,PHF8,CDC45,ITGB1,CCNE1,SENP2,LATS1,CIRBP,KLF4,CCND3,MEPCE,CDC25A,KIF14,RPS6KB1,CACUL1
regulation of signal transduction by p53 class mediator	GO:1901796	0.000139109	3.85664	66	2742	26	21272	PAK1IP1,DDX5,TRIAP1,BOP1,HNRNPK,ATR,MDM4,CCDC94,RPL5,RRS1,RPF2,RPL11,ATM,RPL26,KDM1A,NPM1,EEF1E1,RPS7,MDM2,DYRK1A,HEXIM1,RRN3,RPL23,TRIM24,MIF,ATAD5
interstrand cross-link repair	GO:0036297	0.000140196	3.85326	32	2742	17	21272	FANCL,XRCC3,FANCA,RAD51D,RAD51,ERCC4,RFWD3,DCLRE1B,MCM9,FANCM,FANCD2,FANCG,FANCB,MSH6,MCM8,FANCC,SLX4
negative regulation of translation	GO:0017148	0.000146917	3.83293	139	2742	42	21272	METTL14,TYMS,EIF6,DDX3X,TARDBP,DHFR,UPF1,CNOT3,CNOT10,ILF3,STAT3,TRIM71,PUS7,SRP9,MALSU1,DHX36,EIF2S1,EIF4E2,RPS3,CNOT8,METTL16,YBX1,NCL,GAPDH,EPRS,ZFP36L1,EIF4A3,TPR,EIF4E,GIGYF2,TSC1,KHSRP,CNOT2,CNOT1,EIF4ENIF1,MRPL13,CIRBP,CAPRIN1,SYNCRIP,FTO,XRN1,OTUD6B
nuclear mRNA surveillance	GO:0071028	0.000153051	3.81516	12	2742	10	21272	PCID2,EXOSC10,EXOSC3,EXOSC2,EXOSC5,EXOSC8,EXOSC7,PRPF18,EXOSC4,XRN1
nuclear RNA surveillance	GO:0071027	0.000153051	3.81516	12	2742	10	21272	PCID2,EXOSC10,EXOSC3,EXOSC2,EXOSC5,EXOSC8,EXOSC7,PRPF18,EXOSC4,XRN1
histone mRNA metabolic process	GO:0008334	0.000161723	3.79123	17	2742	12	21272	CPSF3,CPSF2,LSM11,EXOSC10,UPF1,SSB,MTPAP,ATM,EXOSC4,DCP2,XRN1,SLBP
negative regulation of DNA metabolic process	GO:0051053	0.000165801	3.78041	125	2742	39	21272	RTEL1,HNRNPU,DNAJC2,TEN1,ERCC4,EXOSC10,CHEK1,RIF1,PAM16,THOC1,TRIM28,NAT10,TINF2,RPS3,GNL3L,ATM,MCRS1,HNRNPA1,NBN,FLCN,HNRNPC,OTUB1,BLM,POLQ,TERF1,RMI2,ZSCAN4C,MSH6,XRCC5,PINX1,CTC1,XRCC1,UBR5,MSH2,DCP2,TERF2,NMNAT1,SLX4,ACD
regulation of DNA repair	GO:0006282	0.000165801	3.78041	125	2742	39	21272	RTEL1,PPP4C,RAD51,ACTR2,PCNA,MMS19,PARP1,UBE2N,CHEK1,RIF1,RNF8,TRIM28,FIGNL1,DDX11,TIMELESS,FH1,RPS3,CDK9,SETD2,HMGB1,RPA2,KAT7,PNKP,OTUB1,BLM,BRCA1,POLQ,KDM1A,WRAP53,BABAM1,RMI2,USP1,FUS,PRKDC,XRCC1,UBR5,ARID2,PARG,RNF168
regulation of mRNA 3'-end processing	GO:0031440	0.000170545	3.76816	29	2742	16	21272	NCBP1,RNF40,NCBP2,CDC73,NUDT21,CTR9,PAF1,DHX36,SUPT5,CDK9,RNF20,ZC3H3,ZFP36L1,NELFE,CCNB1,CCNT1
chromatin organization involved in negative regulation of transcription	GO:0097549	0.000173375	3.76101	130	2742	40	21272	HIST1H2AE,HIST1H2AN,POU5F1,HDAC1,SIN3A,RIF1,SETDB1,SMARCA4,FAM208A,DNMT1,TRIM28,H2AFZ,HIST1H2AB,MORF4L2,PPM1D,HIST2H2AA2,MPHOSPH8,SMARCA5,HAT1,KDM1A,HIST1H2AI,EZH2,TPR,HELLS,NAA40,HIST2H2AA1,EED,HIST2H2AC,PHF8,HIST1H2AH,CDC45,ATAD2,MORC2A,HIST1H2AK,ATF7IP,H2AFX,H2AFJ,NRDE2,KMT2D,HIRA
positive regulation of TOR signaling	GO:0032008	0.000175109	3.75669	43	2742	20	21272	MIOS,LAMTOR4,TELO2,HDAC3,LARS,PIH1D1,RICTOR,LAMTOR3,LAMTOR1,RRAGC,MLST8,RPTOR,RRAGA,SEC13,LAMTOR2,FLCN,WDR59,TMEM55B,WDR24,SEH1L
RNA localization to Cajal body	GO:0090670	0.000179869	3.74504	8	2742	8	21272	CCT2,TCP1,EXOSC10,DKC1,CCT4,PARN,WRAP53,DCP2
RNA localization to nucleus	GO:0090685	0.000179869	3.74504	8	2742	8	21272	CCT2,TCP1,EXOSC10,DKC1,CCT4,PARN,WRAP53,DCP2
telomerase RNA localization	GO:0090672	0.000179869	3.74504	8	2742	8	21272	CCT2,TCP1,EXOSC10,DKC1,CCT4,PARN,WRAP53,DCP2
telomerase RNA localization to Cajal body	GO:0090671	0.000179869	3.74504	8	2742	8	21272	CCT2,TCP1,EXOSC10,DKC1,CCT4,PARN,WRAP53,DCP2
establishment of spindle localization	GO:0051293	0.000197332	3.7048	47	2742	21	21272	BCCIP,CENPA,ZW10,NUMA1,KPNB1,PLK1,DYNLT1F,SPDL1,DYNC1H1,DYNLT1B,MCPH1,SPAG5,MAD2L1,DCTN1,DYNLT1A,ITGB1,NDC80,ACTR10,ACTR1A,ACTR1B,PAFAH1B1
establishment of spindle orientation	GO:0051294	0.000243636	3.61326	40	2742	19	21272	BCCIP,CENPA,ZW10,NUMA1,PLK1,DYNLT1F,SPDL1,DYNLT1B,MCPH1,SPAG5,MAD2L1,DCTN1,DYNLT1A,ITGB1,NDC80,ACTR10,ACTR1A,ACTR1B,PAFAH1B1
positive regulation of telomere maintenance via telomerase	GO:0032212	0.000254365	3.59454	33	2742	17	21272	CCT7,CCT2,TCP1,DKC1,CCT3,CCT4,CCT5,ATM,PARN,AURKB,HNRNPA1,PNKP,CCT8,XRCC5,NEK2,MAPK1,ACD
positive regulation of protein localization to nucleus	GO:1900182	0.00025598	3.59179	85	2742	30	21272	ZPR1,STK11,TFRC,HDAC3,TARDBP,RBM22,PARP1,RAN,TRIM28,ECT2,NUTF2,CDK1,NMD3,PIK3R2,EP300,DMAP1,OGT,MCRS1,KAT7,IPO5,BRCA1,HSP90AB1,TPR,NPM1,PINX1,CDH1,PRKCD,MAPK1,UBR5,MAPK14
mRNA methylation	GO:0080009	0.000316097	3.50018	15	2742	11	21272	METTL14,CMTR1,TRMT61A,METTL16,WTAP,TRMT10C,CMTR2,NSUN2,ZC3H13,TRMT6,METTL3
anaphase-promoting complex-dependent catabolic process	GO:0031145	0.000316097	3.50018	15	2742	11	21272	ANAPC1,CUL3,CDC16,UBE2C,CDC27,ANAPC10,CDC20,ANAPC4,UBE2S,ANAPC5,CDC26
kinetochore assembly	GO:0051382	0.000316097	3.50018	15	2742	11	21272	CENPA,CENPN,SENP6,MIS12,CENPW,POGZ,CENPH,CENPK,CENPC1,CENPE,CENPT
oligosaccharide-lipid intermediate biosynthetic process	GO:0006490	0.000316097	3.50018	15	2742	11	21272	DPAGT1,ALG13,DHDDS,ALG11,ALG2,SRD5A3,ALG14,NUS1,ALG8,ALG12,ALG6
nuclear pore organization	GO:0006999	0.000316097	3.50018	15	2742	11	21272	AHCTF1,NUP205,NUP93,NUP107,NUP153,TPR,NUP133,SEH1L,NDC1,NUP54,NUP98
regulation of RNA stability	GO:0043487	0.00032062	3.49401	104	2742	34	21272	METTL14,DDX49,HNRNPU,APEX1,PCID2,TARDBP,UPF1,DKC1,FASTKD1,TRIM71,DHX36,METTL16,PARN,YBX1,PDE12,HNRNPC,ZFP36L1,FASTKD3,NPM1,NSUN2,FUS,GIGYF2,DAZL,KHSRP,ELAVL1,NAF1,THRAP3,DCP2,CIRBP,MTOR,SYNCRIP,ALKBH5,FTO,RBM10
response to UV	GO:0009411	0.000351312	3.45431	138	2742	41	21272	STK11,TRIAP1,REV1,RUVBL2,SDE2,ERCC4,PCNA,ERCC2,PARP1,ATR,CHEK1,DDB1,CUL4B,DHX36,HUS1,EIF2S1,POLD1,UBE4B,ERCC3,TIPIN,EP300,SPRTN,AURKB,ACTR5,RPL26,INO80,KDM1A,NPM1,MSH6,USP1,MDM2,MSH2,BRCA2,YY1,CIRBP,RPAIN,N4BP1,RNF168,METTL3,CDC25A,FBXW7
centromere complex assembly	GO:0034508	0.000389492	3.4095	27	2742	15	21272	CENPA,CENPN,SENP6,MIS12,CENPO,CENPW,POGZ,CENPH,CENPK,OIP5,HELLS,CENPC1,CENPP,CENPE,CENPT
regulation of protein localization to nucleus	GO:1900180	0.000436824	3.35969	139	2742	41	21272	ZPR1,PPP2CA,STK11,TFRC,HDAC3,TARDBP,SIN3A,RBM22,PARP1,RAN,TRIM28,ECT2,NUTF2,CDK1,NMD3,PIK3R2,EP300,NF2,NF1,DMAP1,NOLC1,OGT,MCRS1,NUPL1,KAT7,FLCN,IPO5,BRCA1,HSP90AB1,POLR1A,TPR,NPM1,PINX1,CDH1,PRKCD,NVL,MAPK1,NUP62,UBR5,MAPK14,NUP54
cellular response to UV	GO:0034644	0.000447762	3.34895	78	2742	28	21272	STK11,TRIAP1,RUVBL2,SDE2,ERCC4,PCNA,PARP1,ATR,CHEK1,DDB1,CUL4B,DHX36,EIF2S1,POLD1,EP300,AURKB,ACTR5,RPL26,INO80,KDM1A,NPM1,MDM2,YY1,N4BP1,RNF168,METTL3,CDC25A,FBXW7
proteasomal ubiquitin-independent protein catabolic process	GO:0010499	0.000465595	3.33199	21	2742	13	21272	PSMB6,PSMA1,PSMA6,PSMA5,PSMB1,PSMA3,PSMB4,PSMB7,PSMB3,PSMA4,PSMB2,PSMA7,PSMB5
protein insertion into mitochondrial membrane	GO:0051204	0.000465595	3.33199	21	2742	13	21272	TIMM10,HSPA4,TOMM22,COX18,NDUFA13,ROMO1,TIMM9,SAMM50,TOMM40,TIMM13,TIMM22,AGK,PDCD5
nucleoside triphosphate metabolic process	GO:0009141	0.000475034	3.32328	115	2742	36	21272	ATP5A1,TYMS,DUT,ITPA,OPA1,MFN1,ALDOA,PARP1,RAN,STOML2,ATP5H,ATP5B,STAT3,ATP5C1,IMPDH2,DTYMK,MYC,ATP5J2,PKM,VCP,GUK1,ATP5K,CMPK1,ATP5O,ATP5J,ATP5L,CAD,ATP5D,FLCN,CYC1,AK2,BCL2L1,ATP5E,UQCC3,CTPS,NDUFC2
ATP biosynthetic process	GO:0006754	0.000477335	3.32118	57	2742	23	21272	ATP5A1,ALDOA,PARP1,STOML2,ATP5H,ATP5B,STAT3,ATP5C1,MYC,ATP5J2,PKM,VCP,ATP5K,ATP5O,ATP5J,ATP5L,ATP5D,FLCN,CYC1,BCL2L1,ATP5E,UQCC3,NDUFC2
blastocyst formation	GO:0001825	0.000483427	3.31567	53	2742	22	21272	POU5F1,MFN2,NLE1,CNOT3,RRP7A,CUL3,CTR9,RPL7L1,PRDM14,ACTL6A,PBRM1,SP1,WDR74,USPL1,BYSL,MATR3,CNOT2,CNOT1,SF3B6,LATS1,SUPT6,CITED2
signal transduction in response to DNA damage	GO:0042770	0.000526664	3.27847	92	2742	31	21272	PRPF19,DDX5,TRIAP1,ATR,CHEK1,MDM4,CCDC94,KAT5,CDC5L,GRB2,USP10,PLK1,PPM1D,ATM,RPL26,NBN,BRCA1,KDM1A,BABAM1,NPM1,EEF1E1,PRKDC,MDM2,DYRK1A,PAXIP1,BRCA2,ATRX,ING4,MIF,MAPK14,ATAD5
regulation of protein import	GO:1904589	0.000532416	3.27375	83	2742	29	21272	ZPR1,PPP2CA,HDAC3,TARDBP,RBM22,RAN,TRIM28,ECT2,NUTF2,CDK1,PIK3R2,EP300,NF1,DMAP1,NOLC1,NUPL1,IPO5,BRCA1,HSP90AB1,TOMM70A,TPR,CDH1,PRKCD,MAPK1,NUP62,UBR5,MAPK14,NUP54,PDCD5
inner mitochondrial membrane organization	GO:0007007	0.000584979	3.23286	31	2742	16	21272	TMEM11,TIMM10,LETM1,OPA1,DNAJC11,MYC,NDUFA13,ROMO1,TIMM9,SAMM50,TIMM13,OMA1,TIMM22,AGK,UQCC3,CHCHD3
mitotic DNA integrity checkpoint	GO:0044774	0.000610875	3.21405	66	2742	25	21272	RAD9A,MRE11A,TOP2A,RFWD3,HUS1,CDK1,TIPIN,TOPBP1,ATM,DONSON,RPL26,RPA2,FANCD2,NBN,RAD17,BLM,ORC1,PRKDC,GIGYF2,MDM2,PPP1R10,MSH2,ZFP830,CCNG1,NAE1
positive regulation of cellular process	GO:0048522	0.00061209	3.21318	5780	2742	856	21272	OXSR1,PNPT1,PRPF19,FDPS,NSF,RAD9A,ATP5A1,METTL14,PPP2R1A,ZPR1,ELP5,PRMT5,PPP2CA,FEN1,VHL,KAT8,DR1,TXN1,MIOS,L3MBTL2,RIOK1,ELP3,EIF2S3X,DDX49,EIF6,RTEL1,HNRNPU,TIMM17A,XRCC3,SMC6,ELP6,SMC5,SCAP,G6PDX,PRMT1,DDX5,CDC37,POU5F1,LAMTOR4,STK11,TELO2,DNAJC2,MAX,TFRC,FAM98B,MRE11A,MED20,PSMD14,NCBP1,HDAC1,SF3B4,RACGAP1,DHX33,MED12,SMARCC1,TRIAP1,ATP6V0C,CCT7,RFC2,ISCU,RNF40,CTCF,TOMM22,GTF2B,DDX3X,ZFP281,…
positive regulation of histone modification	GO:0031058	0.00064207	3.19242	102	2742	33	21272	L3MBTL2,RNF40,RUVBL2,UBE2N,PIH1D1,RIF1,DNMT1,CTR9,PAF1,BRD4,WDR5,RTF1,EP300,NELFA,CDK9,JARID2,RNF20,ATM,MTF2,SMARCB1,OGT,KAT7,BRCA1,KDM1A,WDR61,NELFE,NIPBL,EED,SART3,PAXIP1,CCNB1,TADA2A,ING2
positive regulation of protein import	GO:1904591	0.000694828	3.15812	58	2742	23	21272	ZPR1,HDAC3,TARDBP,RBM22,RAN,TRIM28,ECT2,NUTF2,CDK1,PIK3R2,EP300,DMAP1,IPO5,BRCA1,HSP90AB1,TOMM70A,TPR,CDH1,PRKCD,MAPK1,UBR5,MAPK14,PDCD5
regulation of cellular protein localization	GO:1903827	0.000703726	3.1526	558	2742	114	21272	ZPR1,PPP2CA,CLTC,VHL,TXN1,STK11,TFRC,CCT7,ACTR3,HDAC3,CCT2,TCP1,ACTB,TARDBP,ARPC2,SIN3A,RBM22,HNRNPK,PARP1,DKC1,RAN,CCT3,CCT4,KIF20B,TRIM28,ECT2,CCT5,CHCHD4,NUTF2,UBE2G2,SEC16A,CDT1,CDK1,NUMA1,NMD3,PIK3R2,GNL3L,EP300,RANGAP1,PLK1,XPO1,NF2,NF1,SETD2,DMAP1,TOMM7,ANP32B,NOLC1,OGT,MCRS1,GNL3,NUPL1,KAT7,FLCN,THOC2,IPO5,CCT8,BRCA1,HSP90AB1,TSG101,GBF1,TERF1,POLR1A,KDM1A,WRAP53,RER1,BARD1,TPR,IQGAP1,NPM…
response to leukemia inhibitory factor	GO:1990823	0.000765195	3.11623	117	2742	36	21272	MRPL15,HNRNPU,POU5F1,TFRC,MAT2A,RIF1,SRSF3,RPS16,SRSF7,MGA,BCLAF1,CHCHD4,RARG,MYBL2,JARID2,HK2,PFKP,MTF2,NR5A2,SMARCA5,NCL,SOCS3,SBNO2,HELLS,XRCC5,EEF1E1,EED,RNMT,CTBP2,TWISTNB,KLF4,NFYB,SPRY4,ABCD4,SMAD7,SLC25A5
cellular response to leukemia inhibitory factor	GO:1990830	0.000765195	3.11623	117	2742	36	21272	MRPL15,HNRNPU,POU5F1,TFRC,MAT2A,RIF1,SRSF3,RPS16,SRSF7,MGA,BCLAF1,CHCHD4,RARG,MYBL2,JARID2,HK2,PFKP,MTF2,NR5A2,SMARCA5,NCL,SOCS3,SBNO2,HELLS,XRCC5,EEF1E1,EED,RNMT,CTBP2,TWISTNB,KLF4,NFYB,SPRY4,ABCD4,SMAD7,SLC25A5
negative regulation of cellular catabolic process	GO:0031330	0.00077676	3.10971	242	2742	60	21272	HNRNPU,LRPPRC,SMARCC1,PABPC1,TARDBP,DKC1,PDCL3,RPL5,PAM16,STAT3,WAC,RGP1,DHX36,UBE2G2,RPL11,SCFD1,RRAGA,USP36,SCO1,POLDIP2,METTL16,USP7,PARN,FOXK1,RYBP,YBX1,OGT,UCHL5,HNRNPC,PHF23,BECN1,HSP90AB1,USP30,NSUN2,SLIRP,FUS,EHMT2,RIC1,RPS7,NAMPT,DAZL,CAML,RPL23,TSC1,ELAVL1,NAF1,FOXK2,THRAP3,CIRBP,MTOR,NRDE2,SYNCRIP,NMNAT1,N4BP1,SECISBP2,NPC1,MTMR9,SEC22B,RBM10,SENP1
ribonucleoside triphosphate metabolic process	GO:0009199	0.000814069	3.08934	89	2742	30	21272	ATP5A1,ITPA,OPA1,MFN1,ALDOA,PARP1,RAN,STOML2,ATP5H,ATP5B,STAT3,ATP5C1,IMPDH2,MYC,ATP5J2,PKM,VCP,ATP5K,ATP5O,ATP5J,ATP5L,CAD,ATP5D,FLCN,CYC1,BCL2L1,ATP5E,UQCC3,CTPS,NDUFC2
negative regulation of biological process	GO:0048519	0.000851691	3.06972	5501	2742	817	21272	OXSR1,PKMYT1,PNPT1,HIST1H2AE,HIST1H2AN,PRPF19,RAD9A,ATP5A1,METTL14,ZPR1,PRMT5,PPP2CA,CLTC,VHL,CHMP6,KAT8,DR1,TXN1,WDR73,SKIV2L,L3MBTL2,TYMS,PAK1IP1,BANF1,EIF6,RTEL1,HNRNPU,XRCC3,ATP1A1,BRAP,G6PDX,PRMT1,DDX5,POU5F1,NR0B1,STK11,DNAJC2,LETM1,ATAD3A,MAX,NELFB,TFRC,MRE11A,UXT,NCBP1,NUBP1,HDAC1,LRPPRC,VDAC1,SMARCC1,TRIAP1,ATP6V0C,SMARCE1,CLP1,DPH3,ISCU,GLRX3,RNF40,CTCF,VPS25,DDX3X,ZFP281,RUVBL2,ACTR3,H…
positive regulation of nucleocytoplasmic transport	GO:0046824	0.00093902	3.02733	76	2742	27	21272	ZPR1,HDAC3,NCBP2,TARDBP,RBM22,RAN,TRIM28,ECT2,NUTF2,CDK1,PIK3R2,EP300,DMAP1,ANP32B,IPO5,BRCA1,HSP90AB1,TPR,MDM2,CDH1,PRKCD,MAPK1,XPO4,UBR5,KHDRBS1,NRDE2,MAPK14
nucleoside triphosphate biosynthetic process	GO:0009142	0.000950592	3.02201	85	2742	29	21272	ATP5A1,TYMS,ALDOA,PARP1,STOML2,ATP5H,ATP5B,STAT3,ATP5C1,IMPDH2,DTYMK,MYC,ATP5J2,PKM,VCP,ATP5K,CMPK1,ATP5O,ATP5J,ATP5L,CAD,ATP5D,FLCN,CYC1,BCL2L1,ATP5E,UQCC3,CTPS,NDUFC2
regulation of spindle organization	GO:0090224	0.00100968	2.99582	43	2742	19	21272	CLTC,HNRNPU,RCC1,RAE1,SMC3,SENP6,NUMA1,BORA,TPX2,PLK1,DYNC1H1,DRG1,SMC1A,TPR,SPAG5,DCTN1,CHMP1A,NUP62,STAG2
positive regulation of protein modification by small protein conjugation or removal	GO:1903322	0.00102016	2.99133	138	2742	40	21272	RNF40,DDX3X,RBX1,UBE2N,DNAJA3,UBA2,CUL3,HUWE1,RPS2,CTR9,MASTL,SUMO2,VCP,SAE1,PLK1,CDK9,RNF20,FANCM,SPRTN,GNL3,PIAS4,PHF23,BRCA1,MUL1,KDM1A,CDC20,NPM1,WDR48,SART3,PAXIP1,HSPA5,SENP2,UBE3A,UBE2I,FKBP1A,TOPORS,UBE2S,SMAD7,DERL1,FBXW7
cellular response to ionizing radiation	GO:0071479	0.00106233	2.97374	72	2742	26	21272	RAD9A,RAD51,ATR,XRCC6,LIG4,RAD1,ECT2,FIGNL1,GRB2,HUS1,ATM,RPL26,BLM,INO80,KDM1A,INTS7,DNM2,NIPBL,XRCC5,BCL2L1,NAMPT,MDM2,GTF2H5,HSPA5,H2AFX,MAPK14
regulation of microtubule cytoskeleton organization	GO:0070507	0.00107807	2.96735	206	2742	53	21272	CLTC,HNRNPU,XRCC3,NUBP1,RCC1,TBCD,CHEK1,RAE1,SMC3,SENP6,KIF18A,SKA2,MAPRE1,KIF11,NUMA1,RPS3,RANBP1,BORA,TPX2,CHMP3,PLK1,XPO1,CKAP5,ARL2,DYNC1H1,CEP85,DRG1,CAMSAP3,MCPH1,SMC1A,TPR,SKA3,NPM1,SPAG5,CHORDC1,KATNB1,CENPJ,DCTN1,CEP192,CCNF,SKA1,DYRK1A,NEK2,CHMP1A,NUP62,RAC1,STAG2,PAFAH1B1,POC1A,APC,CLIP3,STIL,AZIN1
signal transduction by p53 class mediator	GO:0072331	0.0012555	2.90118	129	2742	38	21272	PAK1IP1,DDX5,STK11,TRIAP1,BOP1,HNRNPK,ATR,MDM4,CCDC94,RPL5,RRS1,KAT5,RPF2,MYBBP1A,USP10,RPL11,EP300,PPM1D,ATM,RPL26,KDM1A,NPM1,EEF1E1,RPS7,MDM2,DYRK1A,HEXIM1,RRN3,PAXIP1,RPL23,TRIM24,MSH2,BRCA2,ATRX,ING4,MIF,TOPORS,ATAD5
regulation of protein import into nucleus	GO:0042306	0.00126949	2.89637	77	2742	27	21272	ZPR1,PPP2CA,HDAC3,TARDBP,RBM22,RAN,TRIM28,ECT2,NUTF2,CDK1,PIK3R2,EP300,NF1,DMAP1,NOLC1,NUPL1,IPO5,BRCA1,HSP90AB1,TPR,CDH1,PRKCD,MAPK1,NUP62,UBR5,MAPK14,NUP54
protein insertion into membrane	GO:0051205	0.00127641	2.89401	36	2742	17	21272	TIMM10,HSPA4,TOMM22,COX18,NDUFA13,ROMO1,WRB,TIMM9,SAMM50,TOMM40,TIMM13,OXA1L,TIMM22,GET4,AGK,ASNA1,PDCD5
pre-replicative complex assembly involved in cell cycle DNA replication	GO:1902299	0.00139851	2.85434	7	2742	7	21272	MCM4,MCM2,MCM7,ORC3,MCM6,MCM5,MCM3
pre-replicative complex assembly involved in nuclear cell cycle DNA replication	GO:0006267	0.00139851	2.85434	7	2742	7	21272	MCM4,MCM2,MCM7,ORC3,MCM6,MCM5,MCM3
regulation of telomerase RNA localization to Cajal body	GO:1904872	0.00139851	2.85434	7	2742	7	21272	CCT2,TCP1,EXOSC10,DKC1,CCT4,PARN,DCP2
pre-replicative complex assembly	GO:0036388	0.00139851	2.85434	7	2742	7	21272	MCM4,MCM2,MCM7,ORC3,MCM6,MCM5,MCM3
purine nucleoside triphosphate metabolic process	GO:0009144	0.00140279	2.85301	91	2742	30	21272	ATP5A1,ITPA,OPA1,MFN1,ALDOA,PARP1,RAN,STOML2,ATP5H,ATP5B,STAT3,ATP5C1,IMPDH2,MYC,ATP5J2,PKM,VCP,GUK1,ATP5K,ATP5O,ATP5J,ATP5L,ATP5D,FLCN,CYC1,AK2,BCL2L1,ATP5E,UQCC3,NDUFC2
negative regulation of RNA catabolic process	GO:1902369	0.00142502	2.84618	60	2742	23	21272	HNRNPU,LRPPRC,PABPC1,TARDBP,DKC1,DHX36,METTL16,PARN,YBX1,HNRNPC,NSUN2,SLIRP,FUS,DAZL,ELAVL1,NAF1,THRAP3,CIRBP,MTOR,NRDE2,SYNCRIP,SECISBP2,RBM10
response to gamma radiation	GO:0010332	0.00142502	2.84618	60	2742	23	21272	RAD51,PARP1,ATR,XRCC6,LIG4,POLG,MYC,ATM,RPL26,XRCC2,POLB,FANCD2,KDM1A,XRCC5,PRKDC,BCL2L1,MDM2,GTF2H5,HSPA5,BRCA2,H2AFX,SOD2,CBL
spliceosomal tri-snRNP complex assembly	GO:0000244	0.00143381	2.84351	9	2742	8	21272	PRPF19,AAR2,LSM2,PRPF6,PRPF8,PRPF3,SART3,PRPF31
RNA polymerase I preinitiation complex assembly	GO:0001188	0.00143381	2.84351	9	2742	8	21272	PIH1D1,SMARCA4,UBTF,TAF1C,SMARCB1,TAF1B,RRN3,POLR1E
purine ribonucleoside triphosphate metabolic process	GO:0009205	0.00146981	2.83274	82	2742	28	21272	ATP5A1,ITPA,OPA1,MFN1,ALDOA,PARP1,RAN,STOML2,ATP5H,ATP5B,STAT3,ATP5C1,IMPDH2,MYC,ATP5J2,PKM,VCP,ATP5K,ATP5O,ATP5J,ATP5L,ATP5D,FLCN,CYC1,BCL2L1,ATP5E,UQCC3,NDUFC2
regulation of intracellular transport	GO:0032386	0.0015406	2.81231	361	2742	80	21272	ZPR1,PPP2CA,TXN1,ACTR3,ARF1,HDAC3,NCBP2,TARDBP,ARPC2,RBM22,RAN,VPS11,KIF20B,TRIM28,ECT2,CHCHD4,NUTF2,UBE2G2,SEC16A,PTPN23,CDK1,NUMA1,SCFD1,PIK3R2,CHMP3,EP300,RANGAP1,XPO1,NF1,SETD2,DMAP1,PREB,TOMM7,NUP214,ANP32B,NOLC1,OGT,DYNC1H1,NUPL1,THOC2,IPO5,BRCA1,HSP90AB1,NUP153,BARD1,TPR,SPAG5,NSUN2,PCM1,PTPN11,PPP1R12A,AKT2,NUS1,DCTN1,RABGEF1,MDM2,CDH1,PRKCD,DNAJC13,IWS1,MAPK1,XPO4,NUP62,PARL,UBR5,ICE1,KH…
positive regulation of protein import into nucleus	GO:0042307	0.00158193	2.80081	52	2742	21	21272	ZPR1,HDAC3,TARDBP,RBM22,RAN,TRIM28,ECT2,NUTF2,CDK1,PIK3R2,EP300,DMAP1,IPO5,BRCA1,HSP90AB1,TPR,CDH1,PRKCD,MAPK1,UBR5,MAPK14
positive regulation of RNA splicing	GO:0033120	0.00158193	2.80081	52	2742	21	21272	PRPF19,ZPR1,NCBP1,SF3B4,SRSF1,RBM22,HNRNPK,POLR2A,SRSF5,SMN1,U2AF2,TRA2B,SNRNP70,NCL,EIF4A3,HSPA8,DYRK1A,DAZAP1,THRAP3,CIRBP,NUP98
protein maturation by iron-sulfur cluster transfer	GO:0097428	0.00181194	2.74186	14	2742	10	21272	FAM96B,HSCB,ISCA2,ISCA1,GLRX3,CIAO1,MMS19,YAE1D1,NFU1,ORAOV1
negative regulation of DNA-templated transcription, elongation	GO:0032785	0.00181194	2.74186	14	2742	10	21272	HNRNPU,NELFCD,RNF8,SUPT5,NELFA,EAPP,EZH2,NELFE,SUPT4A,RNF168
protein N-linked glycosylation	GO:0006487	0.00182646	2.73839	65	2742	24	21272	DPAGT1,ALG13,TMEM258,DHDDS,ALG11,ALG2,SRD5A3,MGAT1,ALG14,DAD1,DDOST,NUS1,MOGS,RPN1,ALG8,ALG12,DOLPP1,ALG5,ALG6,PGM3,B4GALT1,TMEM165,B4GALT7,OST4
ribonucleoside triphosphate biosynthetic process	GO:0009201	0.00196111	2.7075	74	2742	26	21272	ATP5A1,ALDOA,PARP1,STOML2,ATP5H,ATP5B,STAT3,ATP5C1,IMPDH2,MYC,ATP5J2,PKM,VCP,ATP5K,ATP5O,ATP5J,ATP5L,CAD,ATP5D,FLCN,CYC1,BCL2L1,ATP5E,UQCC3,CTPS,NDUFC2
histone H3-K4 methylation	GO:0051568	0.00200965	2.69688	61	2742	23	21272	WDR82,PIH1D1,CXXC1,DNMT1,CTR9,KMT2B,ZFP335,WDR5,RTF1,NELFA,OGT,BRCA1,KDM1A,WDR61,NELFE,EHMT2,SETD1A,RBBP5,PAXIP1,ASH2L,BCOR,DPY30,KMT2D
negative regulation of mRNA splicing, via spliceosome	GO:0048025	0.00203406	2.69164	23	2742	13	21272	HNRNPK,SFSWAP,SRSF7,HNRNPL,PTBP1,U2AF2,TRA2B,SRSF10,NPM1,DYRK1A,RNPS1,SRSF6,RBM10
regulation of translational initiation	GO:0006446	0.0021737	2.6628	57	2742	22	21272	NCBP1,DDX3X,DHX29,EIF3K,NCBP2,EIF2B1,EIF5,EIF2B2,EIF2B5,EIF2S1,POLR2D,POLR2G,GLE1,EIF3B,ALKBH1,TPR,NPM1,DAZL,KHDRBS1,PAIP1,METTL3,RPS6KB1
negative regulation of megakaryocyte differentiation	GO:0045653	0.00223323	2.65107	17	2742	11	21272	PRMT1,HIST1H4H,HIST1H4N,HIST1H4M,HIST1H4B,HIST1H4A,HIST1H4F,HIST1H4J,HIST1H4K,HIST1H4D,HIST1H4C
DNA replication checkpoint	GO:0000076	0.00223323	2.65107	17	2742	11	21272	RAD9A,DNA2,TIMELESS,HUS1,CDT1,TIPIN,TOPBP1,RAD17,ORC1,ZFP830,NAE1
histone H2A acetylation	GO:0043968	0.00223323	2.65107	17	2742	11	21272	RUVBL2,YEATS4,MEAF6,TRRAP,ACTL6A,MORF4L2,EP400,DMAP1,RUVBL1,NAA40,ING3
positive regulation of transcription elongation from RNA polymerase II promoter	GO:0032968	0.00225912	2.64606	20	2742	12	21272	ELL,GTF2F1,CDC73,CTR9,PAF1,BRD4,RTF1,CDK9,EAPP,WDR61,GTF2F2,SUPT6
DNA-templated transcription, termination	GO:0006353	0.00225912	2.64606	20	2742	12	21272	PRMT5,SSU72,POLR2A,POLR3K,SMN1,MED18,TTF2,TTF1,ZNRD1,PCF11,SCAF4,XRN2
histone monoubiquitination	GO:0010390	0.0023731	2.62468	30	2742	15	21272	SKP1A,RNF40,DDB1,CDC73,CTR9,PAF1,WAC,CUL4B,UHRF1,RNF20,RYBP,ATXN7L3,BCOR,PCGF6,RNF168
regulation of double-strand break repair via homologous recombination	GO:0010569	0.00237827	2.62374	45	2742	19	21272	RTEL1,PPP4C,RAD51,ACTR2,MMS19,PARP1,CHEK1,RIF1,FIGNL1,TIMELESS,SETD2,RPA2,BLM,POLQ,KDM1A,WRAP53,RMI2,FUS,ARID2
symbiotic process	GO:0044403	0.00247596	2.60626	371	2742	81	21272	CHMP6,THOC3,EXOC7,BANF1,DDX5,MRE11A,HDAC1,EIF3F,GTF2B,DDX3X,TCP1,EIF3D,PABPC1,SNF8,TARDBP,EIF3A,TOP2A,PPIH,SMARCA4,PPIE,THOC6,DDB1,FAM208A,ILF3,PFN1,THOC1,SSB,TRIM28,CTDP1,PTBP1,EIF3L,RAB7,MYC,ROMO1,VCP,ETF1,CHMP3,EP300,RRAGA,XPR1,KPNA2,MPHOSPH8,HSPD1,VPS18,SMARCB1,NR5A2,PDE12,SP1,THOC5,PSMC3,TRIM6,NBN,HCFC1,PIAS4,EIF3B,CCNK,THOC2,GAPDH,HSP90AB1,TSG101,PI4KA,EIF3G,HSPA8,BCL2L1,VAPA,MORC2A,TAF11,C…
regulation of mRNA catabolic process	GO:0061013	0.00290837	2.53635	118	2742	35	21272	PNPT1,METTL14,HNRNPU,APEX1,PCID2,PABPC1,TARDBP,UPF1,FASTKD1,TRIM71,DHX36,CNOT8,METTL16,YBX1,PDE12,POLR2G,HNRNPC,ZFP36L1,FASTKD3,NPM1,FUS,GIGYF2,DAZL,KHSRP,ELAVL1,CNOT1,THRAP3,DCP2,CIRBP,MTOR,SYNCRIP,ALKBH5,FTO,SECISBP2,RBM10
DNA modification	GO:0006304	0.00305049	2.51563	94	2742	30	21272	PRMT5,ASCC3,CTCF,APEX1,PARP1,EXOSC3,SMARCA4,DNMT1,TRIM28,MYC,EXOSC5,PRDM14,PPM1D,MPHOSPH8,N6AMT1,USP7,TDG,PIK3CA,USP9X,BRCA1,EXOSC4,ALKBH1,EZH2,HELLS,EHMT2,PRMT7,OTUD4,ATF7IP,EHMT1,FTO
meiotic nuclear division	GO:0140013	0.00317714	2.49796	175	2742	46	21272	PPP2R1A,SMC2,MRE11A,FANCA,ACTR3,RAD51D,RAD51,ACTR2,ERCC4,TOP2A,INCENP,KIF18A,RAD1,FIGNL1,MASTL,NCAPH2,SMC4,TOPBP1,PRKAR1A,PLK1,RAD51C,ATM,AURKA,FANCM,FANCD2,PSMD13,RAD54L,TERF1,CDC20,ESPL1,TRIP13,EHMT2,CENPC1,SPIN1,DAZL,CCNE1,CKS2,BRIP1,TTK,BRCA2,NCAPH,FBXO5,NDC1,SYCP1,SLX4,ING2
embryo development	GO:0009790	0.00331222	2.47988	1152	2742	203	21272	PRPF19,ZPR1,SCO2,SBDS,PRMT1,POU5F1,RTCB,COPS3,PITPNB,HDAC1,RACGAP1,MED12,NDUFA2,ZFP281,GTPBP3,OPA1,CMIP,MFN2,SOX2,ELL,PELO,GPI1,KIDINS220,LIAS,TOP2A,SRSF1,SIN3A,ACSL4,ERCC2,RICTOR,CHEK1,NLE1,EMG1,RPL10,SMARCA4,ARFRP1,LIG4,FXN,CNOT3,BTF3,RNASEH2B,RRP7A,CUL3,NANOG,PFN1,CDC73,KEAP1,TRIM71,KIF20B,DNMT1,HINFP,NCAPG2,POLE,TRIM28,TAF8,CTR9,GRB2,PAF1,MED21,BRD4,BIRC6,PSMC4,MYC,RARG,RPA1,RBBP6,DHX36,CHD8,…
positive regulation of cell cycle G1/S phase transition	GO:1902808	0.00348454	2.45785	50	2742	20	21272	DDX3X,APEX1,LSM11,DBF4,LSM10,CDC73,PHB2,PAF1,CUL4B,RPTOR,ANP32B,ANKRD17,TFDP1,EZH2,MTBP,MDM2,CDC45,CCNE1,CCND3,MEPCE
ATP-dependent chromatin remodeling	GO:0043044	0.00351494	2.45408	42	2742	18	21272	SMARCC1,SMARCE1,VPS72,SMARCA4,SMARCAD1,SRCAP,RNF8,CHD8,ACTL6A,DMAP1,PBRM1,SMARCA5,ACTR8,INO80,OIP5,PTMA,CENPP,ARID1A
transcription initiation from RNA polymerase I promoter	GO:0006361	0.00352031	2.45342	12	2742	9	21272	PIH1D1,SMARCA4,UBTF,TAF1C,TTF1,SMARCB1,TAF1B,RRN3,POLR1E
tRNA 5'-leader removal	GO:0001682	0.00352031	2.45342	12	2742	9	21272	POP4,SSB,RPP38,RPP30,RPP21,RPP14,POP5,POP7,POP1
negative regulation of transcription elongation from RNA polymerase II promoter	GO:0034244	0.00352031	2.45342	12	2742	9	21272	HNRNPU,NELFCD,RNF8,NELFA,EAPP,EZH2,NELFE,SUPT4A,RNF168
positive regulation of chromosome separation	GO:1905820	0.00352031	2.45342	12	2742	9	21272	ANAPC11,CUL3,CDC16,CDT1,NUMA1,CDC27,NSMCE2,ANAPC4,ANAPC5
viral process	GO:0016032	0.0036156	2.44182	304	2742	69	21272	CHMP6,BANF1,DDX5,MRE11A,HDAC1,EIF3F,GTF2B,DDX3X,EIF3D,PABPC1,SNF8,TARDBP,EIF3A,TOP2A,PPIH,SMARCA4,PPIE,DDB1,FAM208A,ILF3,PFN1,SSB,TRIM28,CTDP1,PTBP1,EIF3L,RAB7,MYC,VCP,ETF1,CHMP3,EP300,RRAGA,XPR1,KPNA2,MPHOSPH8,VPS18,SMARCB1,NR5A2,PDE12,SP1,PSMC3,TRIM6,NBN,HCFC1,PIAS4,EIF3B,CCNK,HSP90AB1,TSG101,PI4KA,EIF3G,HSPA8,BCL2L1,VAPA,MORC2A,TAF11,CCNT2,UBE2I,SRPK1,SIVA1,DDX6,UVRAG,CUL1,CDC42,KPNA6,CHD1,NPC…
energy coupled proton transport, down electrochemical gradient	GO:0015985	0.00391266	2.40753	24	2742	13	21272	ATP5A1,STOML2,ATP5H,ATP5B,ATP5C1,ATP5J2,ATP5K,ATP5O,ATP5J,ATP5L,ATP5D,CYC1,ATP5E
ATP synthesis coupled proton transport	GO:0015986	0.00391266	2.40753	24	2742	13	21272	ATP5A1,STOML2,ATP5H,ATP5B,ATP5C1,ATP5J2,ATP5K,ATP5O,ATP5J,ATP5L,ATP5D,CYC1,ATP5E
replication fork processing	GO:0031297	0.00404946	2.3926	31	2742	15	21272	RTEL1,MRE11A,MMS22L,RAD51,PCNA,RFWD3,DNA2,THOC1,DDX11,TONSL,CDK9,FANCM,BLM,BRCA2,ATRX
regulation of transcription initiation from RNA polymerase II promoter	GO:0060260	0.00404946	2.3926	31	2742	15	21272	DR1,POU5F1,GTF2B,PSMC5,PSMC6,PSMC4,MYC,DHX36,CAND1,PSMC2,TAF6,PSMC3,PAXIP1,GTF2F2,ATF7IP
Golgi vesicle transport	GO:0048193	0.0045842	2.33874	260	2742	61	21272	NSF,VPS29,NRBP1,YKT6,TRAPPC5,ZW10,ARF1,TRAPPC1,GOSR2,COG4,ARFRP1,ARCN1,CUL3,EXOC1,TRAPPC4,PREPL,SEC16A,COG1,COG7,VCP,SCFD1,TRAPPC8,COPA,SEC13,PREB,SYS1,USO1,COPB2,COG8,EXOC8,COPG1,GBF1,TRAPPC11,VPS51,RER1,DNM2,SEC24C,RAB10,VPS52,EXOC5,COG5,VPS41,VAPA,VPS54,RABIF,HYOU1,TMED2,COPE,UVRAG,GOSR1,RAB8A,RAB12,STX5A,SEC22B,COG3,EXOC2,ARL1,CCDC22,BET1,TRAPPC3,BNIP1
rRNA methylation	GO:0031167	0.00465049	2.3325	21	2742	12	21272	TFB1M,NSUN3,DIMT1,EMG1,TRMT112,FTSJ3,TFB2M,NSUN4,METTL16,FBL,NSUN5,METTL15
purine ribonucleoside triphosphate biosynthetic process	GO:0009206	0.00468457	2.32933	68	2742	24	21272	ATP5A1,ALDOA,PARP1,STOML2,ATP5H,ATP5B,STAT3,ATP5C1,IMPDH2,MYC,ATP5J2,PKM,VCP,ATP5K,ATP5O,ATP5J,ATP5L,ATP5D,FLCN,CYC1,BCL2L1,ATP5E,UQCC3,NDUFC2
negative regulation of cellular component organization	GO:0051129	0.00469624	2.32825	744	2742	140	21272	L3MBTL2,RTEL1,HNRNPU,XRCC3,NUBP1,TRIAP1,DDX3X,ACTR3,ZW10,OPA1,MCM2,BIRC5,TEN1,PCID2,MFN1,TBCD,ERCC4,ARPC2,TOP2A,SIN3A,EXOSC10,DNAJC15,PIH1D1,CHEK1,BUB3,DNM1L,FXN,DYNC1I2,PAM16,PFN1,MNAT1,DNMT1,RAD1,NAT10,TINF2,MAPRE1,FH1,TFIP11,CAPZB,CDT1,WDR5,SCFD1,PRELID1,TPX2,GNL3L,EP300,PRKAR1A,PLK1,JARID2,ATM,MTF2,SMARCB1,PSMG2,SPDL1,AURKB,PEX5,MCRS1,RBPJ,HNRNPA1,CAMSAP3,NBN,FLCN,HNRNPC,OTUB1,PHF23,THOC2,BEC…
regulation of attachment of spindle microtubules to kinetochore	GO:0051988	0.00480362	2.31843	15	2742	10	21272	HNRNPU,RACGAP1,ECT2,AURKB,BECN1,SPAG5,NEK2,CDC42,APC,CCNB1
mitotic chromosome condensation	GO:0007076	0.00480362	2.31843	15	2742	10	21272	SMC2,NCAPH2,SMC4,NCAPD2,PHF23,NIPBL,CHMP1A,NCAPD3,CDCA5,NCAPH
positive regulation of intracellular protein transport	GO:0090316	0.00497927	2.30283	146	2742	40	21272	ZPR1,ACTR3,HDAC3,TARDBP,ARPC2,RBM22,RAN,KIF20B,TRIM28,ECT2,NUTF2,SEC16A,CDK1,PIK3R2,EP300,DMAP1,TOMM7,ANP32B,IPO5,BRCA1,HSP90AB1,TPR,PCM1,AKT2,DCTN1,MDM2,CDH1,PRKCD,MAPK1,XPO4,UBR5,ICE1,B3GAT3,TMEM30A,MAPK14,CDC42,FBXW7,PCNT,MFF,PDCD5
protein import into mitochondrial matrix	GO:0030150	0.00507021	2.29497	18	2742	11	21272	TIMM17A,TIMM50,DNAJC15,TIMM44,PAM16,GRPEL1,ROMO1,TOMM7,TOMM40,TOMM20,DNLZ
regulation of heterochromatin assembly	GO:0031445	0.00507021	2.29497	18	2742	11	21272	POU5F1,SETDB1,FAM208A,DNMT1,TRIM28,MPHOSPH8,TPR,NAA40,PHF8,MORC2A,ATF7IP
protein modification by small protein removal	GO:0070646	0.00514241	2.28883	141	2742	39	21272	COPS3,PSMD14,EIF3F,COPS4,BAP1,SENP6,ENY2,USP37,USP10,TRRAP,VCP,USP16,USP36,COPS6,USP7,GPS1,USP8,ATXN7L3,UCHL5,OTUB1,USP5,USP9X,USP30,BABAM1,USPL1,USP1,COPS8,WDR48,SART3,OTUD4,OTULIN,USP39,SENP2,USP22,USP17LC,SUPT3,OTUD6B,SENP1,AF366264
regulation of mitotic spindle organization	GO:0060236	0.00516176	2.2872	39	2742	17	21272	CLTC,HNRNPU,RCC1,RAE1,SMC3,NUMA1,BORA,TPX2,PLK1,DYNC1H1,DRG1,SMC1A,TPR,DCTN1,CHMP1A,NUP62,STAG2
regulation of ATPase activity	GO:0043462	0.00519439	2.28447	82	2742	27	21272	HSCB,HNRNPU,MCM2,SSBP1,NAPA,DNAJC15,DYNC1I2,PAM16,PFN1,MNAT1,GTF2H2,GRPEL1,DNAJA2,MSH6,TOR1AIP2,GTF2H4,OXA1L,DNAJA1,DYNLL1,TSC1,DNAJC24,MSH2,DNAJB6,NCAPH,ATP4B,CNN3,DNAJC9
non-recombinational repair	GO:0000726	0.00532716	2.2735	64	2742	23	21272	PRPF19,MRE11A,PSMD14,ERCC4,XRCC6,RIF1,LIG4,RNF8,FH1,DCLRE1B,KDM2A,RBBP8,POLB,PNKP,POLQ,WRAP53,XRCC4,XRCC5,PRKDC,XRCC1,UVRAG,POLA1,SLX4
cell aging	GO:0007569	0.00547755	2.26141	111	2742	33	21272	PNPT1,SMC6,SMC5,OPA1,ATR,DNAJA3,ROMO1,CDK1,ATM,YBX1,NSMCE2,SOD1,RSL1D1,NPM1,EEF1E1,PRKDC,NAMPT,MORC3,PRKCD,CTC1,NUP62,BRCA2,H2AFX,MTOR,TERF2,FBXO5,MIF,MAPK14,TBX3,ZMIZ1,CITED2,RWDD1,ING2
protein K11-linked ubiquitination	GO:0070979	0.00547882	2.26131	28	2742	14	21272	ANAPC1,ANAPC11,CDC16,ANAPC2,CDC23,UBE2C,CDC27,ANAPC10,ANAPC4,UBE2T,ANAPC13,UBE2S,ANAPC5,CDC26
mRNA modification	GO:0016556	0.00547882	2.26131	28	2742	14	21272	METTL14,CMTR1,TRMT61A,DKC1,PUS7,METTL16,WTAP,HNRNPC,TRMT10C,CMTR2,NSUN2,ZC3H13,TRMT6,METTL3
negative regulation of cellular amide metabolic process	GO:0034249	0.00551291	2.25862	157	2742	42	21272	METTL14,TYMS,EIF6,DDX3X,TARDBP,DHFR,UPF1,CNOT3,CNOT10,ILF3,STAT3,TRIM71,PUS7,SRP9,MALSU1,DHX36,EIF2S1,EIF4E2,RPS3,CNOT8,METTL16,YBX1,NCL,GAPDH,EPRS,ZFP36L1,EIF4A3,TPR,EIF4E,GIGYF2,TSC1,KHSRP,CNOT2,CNOT1,EIF4ENIF1,MRPL13,CIRBP,CAPRIN1,SYNCRIP,FTO,XRN1,OTUD6B
purine nucleoside triphosphate biosynthetic process	GO:0009145	0.00631022	2.19996	69	2742	24	21272	ATP5A1,ALDOA,PARP1,STOML2,ATP5H,ATP5B,STAT3,ATP5C1,IMPDH2,MYC,ATP5J2,PKM,VCP,ATP5K,ATP5O,ATP5J,ATP5L,ATP5D,FLCN,CYC1,BCL2L1,ATP5E,UQCC3,NDUFC2
phosphorylation of RNA polymerase II C-terminal domain	GO:0070816	0.006351	2.19716	10	2742	8	21272	PPIL4,GTF2H3,BRD4,CDK9,CCNK,CCNH,GTF2H4,GTF2H5
tRNA splicing, via endonucleolytic cleavage and ligation	GO:0006388	0.006351	2.19716	10	2742	8	21272	RTCB,CLP1,ZBTB8OS,TSEN2,DDX1,TSEN54,TSEN15,TSEN34
positive regulation of mitotic metaphase/anaphase transition	GO:0045842	0.006351	2.19716	10	2742	8	21272	ANAPC11,CUL3,CDC16,CDT1,CDC27,NSMCE2,ANAPC4,ANAPC5
regulation of histone ubiquitination	GO:0033182	0.006351	2.19716	10	2742	8	21272	RNF40,UBE2N,CTR9,CDK9,RNF20,OTUB1,KDM1A,UBR5
positive regulation of mitotic sister chromatid separation	GO:1901970	0.006351	2.19716	10	2742	8	21272	ANAPC11,CUL3,CDC16,CDT1,CDC27,NSMCE2,ANAPC4,ANAPC5
positive regulation of transcription of nucleolar large rRNA by RNA polymerase I	GO:1901838	0.006351	2.19716	10	2742	8	21272	PIH1D1,PWP1,SMARCA4,DDX11,SMARCB1,MARS,NCL,MTOR
microtubule nucleation by microtubule organizing center	GO:0051418	0.006351	2.19716	10	2742	8	21272	TUBGCP5,TUBGCP4,TUBGCP2,CENPJ,TUBGCP3,CEP192,MZT1,TUBGCP6
regulation of DNA recombination	GO:0000018	0.00657639	2.18201	102	2742	31	21272	RTEL1,TFRC,PPP4C,RAD51,ACTR2,MMS19,ERCC2,PARP1,CHEK1,RIF1,EXOSC3,SMARCAD1,THOC1,FIGNL1,TIMELESS,SETD2,RPA2,BLM,POLQ,KDM1A,WRAP53,RMI2,ZSCAN4C,MSH6,FUS,PAXIP1,MSH2,ARID2,SUPT6,TERF2,ATAD5
regulation of histone H3-K4 methylation	GO:0051569	0.00671391	2.17302	32	2742	15	21272	PIH1D1,DNMT1,CTR9,KMT2B,ZFP335,WDR5,RTF1,NELFA,BRCA1,KDM1A,WDR61,NELFE,EHMT2,PAXIP1,BCOR
positive regulation of transcription initiation from RNA polymerase II promoter	GO:0060261	0.00718729	2.14343	25	2742	13	21272	POU5F1,GTF2B,PSMC5,PSMC6,PSMC4,MYC,DHX36,CAND1,PSMC2,TAF6,PSMC3,PAXIP1,GTF2F2
positive regulation of DNA replication	GO:0045740	0.00791913	2.10132	44	2742	18	21272	PCNA,DBF4,STOML2,DNA2,CDT1,CDK1,KAT7,INO80,CDC7,NPM1,CDK2,CTC1,RAC1,ATRX,CDC42,GLI2,KCTD13,ATAD5
negative regulation of G2/M transition of mitotic cell cycle	GO:0010972	0.00791913	2.10132	44	2742	18	21272	MRE11A,CHEK1,HUS1,CDK1,TOPBP1,ATM,DONSON,AURKB,NBN,RAD17,BLM,BRCA1,ORC1,PINX1,RAD21,ZFP830,CCNG1,NAE1
viral gene expression	GO:0019080	0.00822629	2.0848	61	2742	22	21272	HDAC1,EIF3F,GTF2B,EIF3D,TARDBP,EIF3A,SMARCA4,PFN1,SSB,CTDP1,PTBP1,EIF3L,EP300,SMARCB1,SP1,PSMC3,EIF3B,EIF3G,TAF11,CCNT2,CHD1,PCBP2
cytokinesis	GO:0000910	0.00824873	2.08361	154	2742	41	21272	CHMP6,RACGAP1,CENPA,ACTR3,ARF1,BIRC5,ACTR2,INCENP,CUL3,KIF20B,ECT2,AHCTF1,BIRC6,KIF23,PRPF40A,PIK3C3,CHMP3,PLK1,SETD2,AURKA,USP8,AURKB,FLCN,BECN1,JTB,DCTN3,PRC1,BCL2L1,CHMP1A,KIF4,NUP62,PIK3R4,ANLN,BRCA2,CHMP7,RAB35,UVRAG,CNTROB,CDC42,APC,KIF14
double-strand break repair via nonhomologous end joining	GO:0006303	0.00922009	2.03526	57	2742	21	21272	PRPF19,MRE11A,PSMD14,ERCC4,XRCC6,RIF1,LIG4,RNF8,FH1,DCLRE1B,KDM2A,POLB,PNKP,POLQ,WRAP53,XRCC4,XRCC5,PRKDC,XRCC1,UVRAG,POLA1
negative regulation of transcription by RNA polymerase II	GO:0000122	0.00956108	2.01949	884	2742	160	21272	PPP2CA,VHL,DR1,TXN1,HNRNPU,DDX5,POU5F1,NR0B1,MAX,UXT,HDAC1,CTCF,ZFP281,IGBP1,HDAC3,NACA,SAP130,HIST2H3C1,HIST1H3F,PCNA,THAP11,SPOP,SIN3A,HNRNPK,MDM4,RPL10,DNAJA3,RIF1,SMARCA4,CUL3,NELFCD,KAT5,NANOG,TFCP2L1,CDC73,RNF8,PHB,DNMT1,HINFP,TRIM28,E2F4,CTR9,PAF1,MGA,MYC,RARG,TIMELESS,CHD8,SUDS3,SREBF2,E4F1,SUPT5,SARNP,RTF1,TGIF1,PRDM14,UHRF1,EP300,ZEB1,PLK1,HIST1H3D,NELFA,XPO1,HIST2H3B,JARID2,DDX20,DMAP1…
regulation of mRNA stability	GO:0043488	0.00978287	2.00953	94	2742	29	21272	METTL14,HNRNPU,APEX1,PCID2,TARDBP,UPF1,FASTKD1,TRIM71,DHX36,METTL16,YBX1,PDE12,HNRNPC,ZFP36L1,FASTKD3,NPM1,FUS,GIGYF2,DAZL,KHSRP,ELAVL1,THRAP3,DCP2,CIRBP,MTOR,SYNCRIP,ALKBH5,FTO,RBM10
ribosomal large subunit export from nucleus	GO:0000055	0.00992897	2.0031	8	2742	7	21272	NUP88,RAN,RRS1,SDAD1,NMD3,XPO1,NPM1
tRNA 3'-end processing	GO:0042780	0.00992897	2.0031	8	2742	7	21272	HSD17B10,POLR3K,SSB,PTCD1,ELAC2,TRMT10C,TRNT1
negative regulation of mRNA 3'-end processing	GO:0031441	0.00992897	2.0031	8	2742	7	21272	RNF40,CTR9,SUPT5,CDK9,RNF20,NELFE,CCNT1
transcription initiation from RNA polymerase III promoter	GO:0006384	0.00992897	2.0031	8	2742	7	21272	GTF3C1,CRCP,POLR3H,SNAPC5,TBP,GTF3C5,BDP1
snRNA transcription by RNA polymerase III	GO:0042796	0.00992897	2.0031	8	2742	7	21272	ELL,SNAPC1,SNAPC5,SNAPC4,ICE2,ZC3H8,ICE1
tRNA aminoacylation for mitochondrial protein translation	GO:0070127	0.00992897	2.0031	8	2742	7	21272	SARS2,AARS2,AARS,GARS,DARS2,WARS2,YARS2
negative regulation of mRNA polyadenylation	GO:1900364	0.00992897	2.0031	8	2742	7	21272	RNF40,CTR9,SUPT5,CDK9,RNF20,NELFE,CCNT1
nucleolus organization	GO:0007000	0.00992897	2.0031	8	2742	7	21272	EMG1,POLR1B,USP36,NOLC1,RPS19,RRN3,PES1
protein insertion into mitochondrial inner membrane	GO:0045039	0.00992897	2.0031	8	2742	7	21272	TIMM10,NDUFA13,ROMO1,TIMM9,TIMM13,TIMM22,AGK
dolichol-linked oligosaccharide biosynthetic process	GO:0006488	0.0101227	1.9947	13	2742	9	21272	DPAGT1,ALG13,DHDDS,ALG2,SRD5A3,ALG14,NUS1,ALG12,ALG6
protein import into peroxisome matrix	GO:0016558	0.0101227	1.9947	13	2742	9	21272	PEX12,PEX10,PEX5,PEX13,PEX2,PEX1,PEX7,PEX6,PEX16
snRNA transcription	GO:0009301	0.0101227	1.9947	13	2742	9	21272	ELL,SNAPC1,SNAPC5,SNAPC4,RPAP2,ICE2,USPL1,ZC3H8,ICE1
mitotic DNA replication	GO:1902969	0.0101227	1.9947	13	2742	9	21272	MCM4,MCM2,RAD51,MCM6,GINS1,CDC45,BRCA2,MCM3,POLA1
regulation of telomerase activity	GO:0051972	0.010171	1.99264	53	2742	20	21272	CCT2,TCP1,TEN1,DKC1,CCT4,MYC,PARN,AURKB,MCRS1,PNKP,HSP90AB1,TERF1,WRAP53,PINX1,NEK2,NVL,NAF1,MAPK1,KLF4,ACD
nucleolar large rRNA transcription by RNA polymerase I	GO:0042790	0.0106332	1.97334	19	2742	11	21272	PIH1D1,PWP1,SMARCA4,DDX11,SMARCB1,MARS,NCL,CD3EAP,TAF1B,MTOR,POLR1E
protein lipoylation	GO:0009249	0.0108701	1.96377	6	2742	6	21272	GLRX5,LIAS,LIPT1,NDUFAB1,LIPT2,GCSH
meiotic chromosome condensation	GO:0010032	0.0108701	1.96377	6	2742	6	21272	SMC2,INCENP,NCAPH2,SMC4,NCAPD3,NCAPH
microtubule nucleation by interphase microtubule organizing center	GO:0051415	0.0108701	1.96377	6	2742	6	21272	TUBGCP5,TUBGCP4,TUBGCP2,TUBGCP3,MZT1,TUBGCP6
regulation of transcription by RNA polymerase III	GO:0006359	0.0113216	1.94609	16	2742	10	21272	ELL,BRF2,DHX36,CHD8,RPTOR,BRF1,ICE2,ZC3H8,ICE1,MTOR
histone H4-K5 acetylation	GO:0043981	0.0113216	1.94609	16	2742	10	21272	KAT8,MEAF6,KANSL3,WDR5,OGT,MCRS1,KAT7,HCFC1,KANSL2,ING4
histone H4-K8 acetylation	GO:0043982	0.0113216	1.94609	16	2742	10	21272	KAT8,MEAF6,KANSL3,WDR5,OGT,MCRS1,KAT7,HCFC1,KANSL2,ING4
proteasome assembly	GO:0043248	0.0113216	1.94609	16	2742	10	21272	ELP2,PSMD4,PSMG4,PSMG1,PSMG2,POMP,PSMD13,ADRM1,OTUD6B,PSMD11
regulation of RNA export from nucleus	GO:0046831	0.0113216	1.94609	16	2742	10	21272	NCBP2,SETD2,THOC2,NUP153,TPR,NSUN2,IWS1,KHDRBS1,SUPT6,NRDE2
negative regulation of catabolic process	GO:0009895	0.0116349	1.93424	302	2742	67	21272	HNRNPU,LRPPRC,SMARCC1,PABPC1,TARDBP,MDM4,DKC1,PDCL3,RPL5,PAM16,STAT3,PHB,SF3B3,WAC,RGP1,DHX36,UBE2G2,MTCH2,RPL11,SCFD1,RRAGA,USP36,SCO1,POLDIP2,METTL16,USP7,PARN,FOXK1,RYBP,YBX1,OGT,UCHL5,HNRNPC,PHF23,BECN1,HSP90AB1,USP30,MAD2L1,NSUN2,SLIRP,FUS,EHMT2,RIC1,RPS7,NAMPT,DAZL,CAML,RPL23,TSC1,ELAVL1,NAF1,FOXK2,THRAP3,CIRBP,MTOR,NRDE2,SYNCRIP,NMNAT1,N4BP1,SECISBP2,NPC1,MTMR9,SEC22B,RBM10,HMGCR,SENP1,AZI…
regulation of DNA-templated transcription, initiation	GO:2000142	0.0118798	1.92519	41	2742	17	21272	DR1,POU5F1,GTF2B,PSMC5,PSMC6,BCLAF1,PSMC4,MYC,DHX36,CAND1,PSMC2,TAF6,PSMC3,RRN3,PAXIP1,GTF2F2,ATF7IP
regulation of protein export from nucleus	GO:0046825	0.0118798	1.92519	41	2742	17	21272	TXN1,RBM22,CHCHD4,RANGAP1,XPO1,SETD2,ANP32B,THOC2,BARD1,TPR,NSUN2,PTPN11,MDM2,IWS1,XPO4,SUPT6,XPO5
DNA methylation or demethylation	GO:0044728	0.0135366	1.86849	81	2742	26	21272	PRMT5,CTCF,APEX1,PARP1,SMARCA4,DNMT1,TRIM28,MYC,PRDM14,PPM1D,MPHOSPH8,N6AMT1,USP7,TDG,PIK3CA,USP9X,BRCA1,ALKBH1,EZH2,HELLS,EHMT2,PRMT7,OTUD4,ATF7IP,EHMT1,FTO
proton transmembrane transport	GO:1902600	0.0138857	1.85743	157	2742	41	21272	ATP5A1,ATP6V1A,ATP6V1B2,ATP1A1,ATP6V0C,COX15,COX7B,COX10,NDUFS7,STOML2,ATP6V1G1,ATP5H,ATP5B,ATP5C1,COX6C,PHB2,COX17,ATP6V0B,ATP2A2,ATP5J2,COX5B,ATP5K,ATP6V1E1,ATP5O,ATP6V0D1,ATP5J,ATP5L,ATP5D,ATP6V1C1,CYC1,ATP6V1F,SLC9A5,ATP6V1D,SLC9A1,COX7C,ATP5E,ATP6AP1,ATP4B,ATP6V1H,TACO1,COX4I1
positive regulation of cellular component organization	GO:0051130	0.015517	1.80919	1246	2742	213	21272	FEN1,L3MBTL2,RTEL1,HNRNPU,SMC5,CDC37,STK11,TFRC,MRE11A,DHX33,CCT7,RNF40,DDX3X,RUVBL2,ACTR3,ARF1,OPA1,CCT2,MFN2,SSBP1,TCP1,BIRC5,ACTR2,MFN1,SF3A2,ARPC4,KIDINS220,ARPC2,ANAPC11,SIN3A,HNRNPK,UBE2N,ATR,PIH1D1,RICTOR,DKC1,EEF1A1,RIF1,SETDB1,DNM1L,LIG4,FXN,WDR1,EIF2B2,CCT3,CUL3,FAM208A,PSMC5,CCT4,HUWE1,PFN1,CDC16,ANAPC2,DNMT1,TRIM28,PSMC6,GTF2H2,CTR9,PHB2,DDX11,GRB2,PAF1,MAPRE1,CCT5,BRD4,PSMC4,EIF4G2,F…
positive regulation of mRNA processing	GO:0050685	0.0167878	1.77501	46	2742	18	21272	PRPF19,NCBP1,SF3B4,NCBP2,CDC73,NUDT21,PAF1,DHX36,TRA2B,SNRNP70,NCL,EIF4A3,HSPA8,DAZAP1,THRAP3,CIRBP,CCNB1,NUP98
regulation of megakaryocyte differentiation	GO:0045652	0.0170926	1.76719	34	2742	15	21272	EIF6,PRMT1,HIST1H4H,HIST1H4N,HIST1H4M,HIST1H4B,HIST1H4A,HMGB2,HIST1H4F,HIST1H4J,KDM1A,HIST1H4K,HIST1H4D,RBM15,HIST1H4C
mitochondrion morphogenesis	GO:0070584	0.0170926	1.76719	34	2742	15	21272	PNPT1,NUBPL,OPA1,SSBP1,MFN1,DNM1L,SUPV3L1,POLDIP2,POLG2,OPA3,SLIRP,BCL2L1,MUP6,MUP9,MFF
positive regulation of ATPase activity	GO:0032781	0.0173452	1.76082	59	2742	21	21272	HSCB,HNRNPU,SSBP1,NAPA,DNAJC15,DYNC1I2,PFN1,GTF2H2,GRPEL1,DNAJA2,MSH6,TOR1AIP2,GTF2H4,DNAJA1,DYNLL1,DNAJC24,MSH2,DNAJB6,NCAPH,ATP4B,DNAJC9
mitotic DNA damage checkpoint	GO:0044773	0.0173452	1.76082	59	2742	21	21272	RAD9A,MRE11A,RFWD3,HUS1,CDK1,TIPIN,TOPBP1,ATM,DONSON,RPL26,RPA2,FANCD2,NBN,BLM,PRKDC,GIGYF2,MDM2,PPP1R10,MSH2,ZFP830,CCNG1
positive regulation of G1/S transition of mitotic cell cycle	GO:1900087	0.0177434	1.75096	38	2742	16	21272	DDX3X,APEX1,LSM11,DBF4,LSM10,CUL4B,RPTOR,ANP32B,ANKRD17,TFDP1,MTBP,MDM2,CDC45,CCNE1,CCND3,MEPCE
positive regulation of telomerase activity	GO:0051973	0.0177434	1.75096	38	2742	16	21272	CCT2,TCP1,DKC1,CCT4,MYC,PARN,AURKB,PNKP,HSP90AB1,WRAP53,NEK2,NVL,NAF1,MAPK1,KLF4,ACD
positive regulation of transcription by RNA polymerase III	GO:0045945	0.020634	1.68542	11	2742	8	21272	ELL,CHD8,RPTOR,BRF1,ICE2,ZC3H8,ICE1,MTOR
positive regulation of heterochromatin assembly	GO:0031453	0.020634	1.68542	11	2742	8	21272	SETDB1,FAM208A,DNMT1,TRIM28,MPHOSPH8,TPR,MORC2A,ATF7IP
RNA splicing, via endonucleolytic cleavage and ligation	GO:0000394	0.020634	1.68542	11	2742	8	21272	RTCB,CLP1,ZBTB8OS,TSEN2,DDX1,TSEN54,TSEN15,TSEN34
telomere maintenance in response to DNA damage	GO:0043247	0.020634	1.68542	11	2742	8	21272	RTEL1,APEX1,ERCC4,RIF1,DCLRE1B,XRCC1,TERF2,ACD
positive regulation of double-strand break repair via homologous recombination	GO:1905168	0.020634	1.68542	11	2742	8	21272	ACTR2,MMS19,PARP1,TIMELESS,BLM,WRAP53,FUS,ARID2
positive regulation of metaphase/anaphase transition of cell cycle	GO:1902101	0.020634	1.68542	11	2742	8	21272	ANAPC11,CUL3,CDC16,CDT1,CDC27,NSMCE2,ANAPC4,ANAPC5
regulation of chromatin assembly	GO:0010847	0.0208682	1.68052	20	2742	11	21272	POU5F1,SETDB1,FAM208A,DNMT1,TRIM28,MPHOSPH8,TPR,NAA40,PHF8,MORC2A,ATF7IP
mitochondrial electron transport, NADH to ubiquinone	GO:0006120	0.0208682	1.68052	20	2742	11	21272	NDUFA8,ISCU,NDUFB9,DNAJC15,NDUFS8,NDUFB8,NDUFB6,NDUFV2,NDUFA10,DLD,NDUFC2
spliceosomal complex assembly	GO:0000245	0.0239427	1.62083	47	2742	18	21272	PRPF19,NCBP1,GEMIN6,SNRPC,SF3A2,SRSF1,SFSWAP,SF3A3,CRNKL1,SF3A1,SRSF10,SLU7,SF3B1,GEMIN2,USP39,ISY1,SRPK1,SRSF6
positive regulation of histone methylation	GO:0031062	0.0239427	1.62083	47	2742	18	21272	L3MBTL2,RIF1,DNMT1,CTR9,PAF1,BRD4,WDR5,RTF1,NELFA,JARID2,RNF20,MTF2,OGT,BRCA1,WDR61,NELFE,EED,PAXIP1
regulation of ribosome biogenesis	GO:0090069	0.0243049	1.61431	17	2742	10	21272	RIOK1,DIMT1,UTP15,TRMT112,WDR75,MALSU1,WDR43,USP36,NCL,HEATR1
regulation of RNA polymerase II transcription preinitiation complex assembly	GO:0045898	0.0250821	1.60064	14	2742	9	21272	DR1,PSMC5,PSMC6,PSMC4,CAND1,PSMC2,PSMC3,GTF2F2,ATF7IP
aminoacyl-tRNA metabolism involved in translational fidelity	GO:0106074	0.0250821	1.60064	14	2742	9	21272	IARS,AARS2,LARS,VARS2,AARS,VARS,IARS2,LARS2,TARS2
female meiotic nuclear division	GO:0007143	0.0263535	1.57916	35	2742	15	21272	PPP2R1A,TOP2A,MASTL,NCAPH2,PRKAR1A,PLK1,RAD51C,ATM,AURKA,TRIP13,SPIN1,DAZL,TTK,NCAPH,FBXO5
negative regulation of cell cycle G2/M phase transition	GO:1902750	0.0268583	1.57092	56	2742	20	21272	MRE11A,CHEK1,HUS1,CDK1,TOPBP1,PLK1,ATM,DONSON,AURKB,NBN,RAD17,BLM,BRCA1,ORC1,BABAM1,PINX1,RAD21,ZFP830,CCNG1,NAE1
positive regulation of biological process	GO:0048518	0.0288486	1.53988	6258	2742	902	21272	OXSR1,PNPT1,PRPF19,FDPS,NSF,RAD9A,ATP5A1,METTL14,PPP2R1A,ZPR1,ELP5,PRMT5,PPP2CA,FEN1,VHL,KAT8,DR1,TXN1,MIOS,L3MBTL2,RIOK1,ELP3,EIF2S3X,DDX49,EIF6,RTEL1,HNRNPU,TIMM17A,XRCC3,SMC6,ATP1A1,ELP6,SMC5,SCAP,G6PDX,PRMT1,DDX5,CDC37,POU5F1,LAMTOR4,STK11,TELO2,DNAJC2,MAX,MED26,TFRC,FAM98B,MRE11A,MED20,PSMD14,NCBP1,HDAC1,SF3B4,RACGAP1,DHX33,MED12,SMARCC1,TRIAP1,ATP6V0C,CCT7,RFC2,POLR3B,ISCU,RNF40,CTCF,TOMM22…
endoplasmic reticulum to Golgi vesicle-mediated transport	GO:0006888	0.0292101	1.53447	114	2742	32	21272	NRBP1,YKT6,TRAPPC5,ZW10,ARF1,TRAPPC1,GOSR2,ARCN1,CUL3,TRAPPC4,SEC16A,VCP,SCFD1,TRAPPC8,COPA,SEC13,PREB,USO1,COPB2,COPG1,TRAPPC11,SEC24C,VAPA,HYOU1,TMED2,COPE,GOSR1,STX5A,SEC22B,COG3,BET1,TRAPPC3
nucleotide biosynthetic process	GO:0009165	0.0306991	1.51287	246	2742	56	21272	ATP5A1,TYMS,DUT,PAICS,G6PDX,UMPS,TAMM41,ALDOA,ACSL4,GMPS,PARP1,CDS2,RRM1,STOML2,ATP5H,NADK2,ATP5B,KARS,STAT3,ATP5C1,IMPDH2,DTYMK,MYC,DHODH,GARS,ATP5J2,PKM,VCP,GUK1,RRM2,ATP5K,CMPK1,ATP5O,ATP5J,GART,ATP5L,CAD,ATP5D,FLCN,PNKP,ADSL,CYC1,AK2,DLD,BCL2L1,NAMPT,MAPK1,PAPSS1,ATP5E,UQCC3,ADCY7,MTHFD1,NMNAT1,CTPS,NADK,NDUFC2
regulation of double-strand break repair	GO:2000779	0.0344215	1.46317	80	2742	25	21272	RTEL1,PPP4C,RAD51,ACTR2,MMS19,PARP1,CHEK1,RIF1,FIGNL1,DDX11,TIMELESS,FH1,SETD2,RPA2,PNKP,OTUB1,BLM,POLQ,KDM1A,WRAP53,RMI2,FUS,PRKDC,UBR5,ARID2
positive regulation of intracellular transport	GO:0032388	0.0348777	1.45745	207	2742	49	21272	ZPR1,ACTR3,ARF1,HDAC3,NCBP2,TARDBP,ARPC2,RBM22,RAN,VPS11,KIF20B,TRIM28,ECT2,NUTF2,SEC16A,PTPN23,CDK1,NUMA1,PIK3R2,EP300,DMAP1,TOMM7,ANP32B,DYNC1H1,IPO5,BRCA1,HSP90AB1,TPR,SPAG5,PCM1,AKT2,DCTN1,MDM2,CDH1,PRKCD,MAPK1,XPO4,UBR5,ICE1,KHDRBS1,B3GAT3,NRDE2,TMEM30A,MAPK14,CDC42,FBXW7,PCNT,MFF,PDCD5
gene silencing	GO:0016458	0.036366	1.4393	324	2742	69	21272	HIST1H2AE,HIST1H2AN,EIF6,DDX5,POU5F1,NCBP1,CLP1,DDX3X,MRPL44,PABPC1,HIST2H3C1,NCBP2,HIST1H3F,SIN3A,RIF1,CNOT3,CNOT10,SRCAP,ZC3H10,STAT3,TRIM71,DNMT1,KMT2B,HIST1H3G,H2AFZ,HIST1H2AB,HIST1H3D,CNOT8,MORF4L2,PPM1D,HIST2H2AA2,HIST2H3B,DROSHA,HIST1H3H,HIST1H3E,HAT1,DICER1,KDM1A,HIST1H2AI,EZH2,HIST1H3A,HELLS,HIST1H3I,CDK2,HIST2H2AA1,EED,SND1,HIST2H2AC,HIST1H2AH,CDC45,CHMP1A,SNIP1,ELAVL1,CNOT2,CNOT1,ATAD2…
chromosome condensation	GO:0030261	0.036695	1.43539	44	2742	17	21272	BANF1,SMC2,TOP2A,INCENP,NCAPG2,NCAPH2,SMC4,CDK1,NCAPD2,PHF23,MCPH1,NIPBL,CHMP1A,NCAPD3,CDCA5,NCAPH,CCNB1
cellular response to light stimulus	GO:0071482	0.0372963	1.42833	100	2742	29	21272	STK11,TRIAP1,RUVBL2,SDE2,ERCC4,PCNA,PARP1,ATR,CHEK1,DDB1,CUL4B,DHX36,EIF2S1,POLD1,EP300,AURKB,ACTR5,RPL26,INO80,KDM1A,NPM1,AKT2,MDM2,YY1,N4BP1,RNF168,METTL3,CDC25A,FBXW7
heme biosynthetic process	GO:0006783	0.0387077	1.4122	21	2742	11	21272	HMBS,UROD,PPOX,COX15,COX10,IBA57,FXN,UROS,SRRD,FECH,CPOX
regulation of transcription by RNA polymerase I	GO:0006356	0.0388591	1.41051	32	2742	14	21272	DHX33,UTP15,PIH1D1,PWP1,SMARCA4,WDR75,DDX11,WDR43,SMARCB1,MARS,NCL,HEATR1,PHF8,MTOR
nuclear pore complex assembly	GO:0051292	0.039662	1.40162	9	2742	7	21272	AHCTF1,NUP205,NUP93,NUP107,NUP153,NDC1,NUP98
regulation of metaphase plate congression	GO:0090235	0.039662	1.40162	9	2742	7	21272	HNRNPU,NUMA1,AURKB,DYNC1H1,BECN1,SPAG5,MAD1L1
RNA capping	GO:0036260	0.039662	1.40162	9	2742	7	21272	CMTR1,NCBP1,GM10767,CMTR2,FAM103A1,RNMT,TGS1
7-methylguanosine RNA capping	GO:0009452	0.039662	1.40162	9	2742	7	21272	CMTR1,NCBP1,GM10767,CMTR2,FAM103A1,RNMT,TGS1
positive regulation of DNA methylation-dependent heterochromatin assembly	GO:0090309	0.039662	1.40162	9	2742	7	21272	SETDB1,FAM208A,DNMT1,TRIM28,MPHOSPH8,MORC2A,ATF7IP
microtubule polymerization or depolymerization	GO:0031109	0.0415834	1.38108	121	2742	33	21272	TBCD,KIF2C,TUBG1,KIF18A,SMN1,SKA2,TUBGCP5,MAPRE1,NUMA1,RPS3,TPX2,TUBGCP4,KIF18B,CKAP5,ARL2,TUBGCP2,DRG1,CAMSAP3,SKA3,KATNB1,CENPJ,ZFP207,TUBGCP3,DCTN1,CEP192,SKA1,DYRK1A,MZT1,RAC1,FBXO5,TUBGCP6,APC,CLIP3
nucleoside phosphate biosynthetic process	GO:1901293	0.0445355	1.35129	249	2742	56	21272	ATP5A1,TYMS,DUT,PAICS,G6PDX,UMPS,TAMM41,ALDOA,ACSL4,GMPS,PARP1,CDS2,RRM1,STOML2,ATP5H,NADK2,ATP5B,KARS,STAT3,ATP5C1,IMPDH2,DTYMK,MYC,DHODH,GARS,ATP5J2,PKM,VCP,GUK1,RRM2,ATP5K,CMPK1,ATP5O,ATP5J,GART,ATP5L,CAD,ATP5D,FLCN,PNKP,ADSL,CYC1,AK2,DLD,BCL2L1,NAMPT,MAPK1,PAPSS1,ATP5E,UQCC3,ADCY7,MTHFD1,NMNAT1,CTPS,NADK,NDUFC2
RNA stabilization	GO:0043489	0.0469007	1.32882	49	2742	18	21272	HNRNPU,TARDBP,DKC1,DHX36,METTL16,PARN,YBX1,HNRNPC,NSUN2,FUS,DAZL,ELAVL1,NAF1,THRAP3,CIRBP,MTOR,SYNCRIP,RBM10
negative regulation of cellular process	GO:0048523	0.0469693	1.32819	5006	2742	732	21272	OXSR1,PKMYT1,PNPT1,HIST1H2AE,HIST1H2AN,PRPF19,RAD9A,ATP5A1,METTL14,ZPR1,PRMT5,PPP2CA,CLTC,VHL,CHMP6,KAT8,DR1,TXN1,WDR73,L3MBTL2,TYMS,PAK1IP1,EIF6,RTEL1,HNRNPU,XRCC3,ATP1A1,BRAP,G6PDX,PRMT1,DDX5,POU5F1,NR0B1,STK11,DNAJC2,LETM1,ATAD3A,MAX,NELFB,TFRC,MRE11A,UXT,NUBP1,HDAC1,LRPPRC,VDAC1,SMARCC1,TRIAP1,ATP6V0C,SMARCE1,DPH3,ISCU,RNF40,CTCF,VPS25,DDX3X,ZFP281,RUVBL2,ACTR3,HSPA9,IGBP1,ZW10,ARF1,OPA1,PFDN…
mRNA cleavage	GO:0006379	0.0483484	1.31562	18	2742	10	21272	NCBP1,CPSF2,NCBP2,FIP1L1,TUT1,POLR2I,NUDT21,CPSF4,CSTF2,ZNRD1
regulation of nucleobase-containing compound transport	GO:0032239	0.0483484	1.31562	18	2742	10	21272	NCBP2,SETD2,THOC2,NUP153,TPR,NSUN2,IWS1,KHDRBS1,SUPT6,NRDE2
peroxisomal membrane transport	GO:0015919	0.0483484	1.31562	18	2742	10	21272	PEX12,PEX10,PEX3,PEX5,PEX13,PEX2,PEX1,PEX7,PEX6,PEX16
protein-DNA complex disassembly	GO:0032986	0.0483484	1.31562	18	2742	10	21272	GRWD1,SMARCC1,SMARCE1,SMARCA4,MYC,PBRM1,SMARCB1,RPL23,ARID2,ARID1A
positive regulation of mitotic nuclear division	GO:0045840	0.0488587	1.31106	58	2742	20	21272	HNRNPU,SMC5,BIRC5,ANAPC11,CUL3,CDC16,PHB2,CDT1,NUMA1,RANBP1,UBE2C,CDC27,AURKB,NSMCE2,BECN1,ANAPC4,NIPBL,NUP62,CDCA5,ANAPC5
regulation of microtubule-based process	GO:0032886	0.0491701	1.3083	244	2742	55	21272	CLTC,HNRNPU,XRCC3,NUBP1,IGBP1,RCC1,TBCD,CHEK1,RAE1,SMC3,SENP6,KIF18A,SKA2,MAPRE1,KIF11,CFAP20,NUMA1,RPS3,RANBP1,BORA,TPX2,CHMP3,PLK1,XPO1,CKAP5,ARL2,DYNC1H1,CEP85,DRG1,CAMSAP3,MCPH1,SMC1A,TPR,SKA3,NPM1,SPAG5,CHORDC1,KATNB1,CENPJ,DCTN1,CEP192,CCNF,SKA1,DYRK1A,NEK2,CHMP1A,NUP62,RAC1,STAG2,PAFAH1B1,POC1A,APC,CLIP3,STIL,AZIN1

## Sheet: SFigure1d_GOCC
term_name	term_id	adjusted_p_value	negative_log10_of_adjusted_p_value	term_size	query_size	intersection_size	effective_domain_size	intersections
organelle lumen	GO:0043233	5e-324	323.306	4631	2754	1519	21187	PKMYT1,PNPT1,VRK1,HIST1H2AE,NDOR1,HIST1H2AN,RABGGTA,COA7,PRPF19,FDPS,REXO2,RAD9A,METTL14,MTG2,GLRX5,ZPR1,CPSF3,ELP5,MRPL15,MRPL52,UBA1,WDR82,PRMT5,FAM96B,TBCA,HSCB,FEN1,VHL,GTF3C1,NDUFA8,BCCIP,THOC3,KAT8,DR1,PPIL2,DDX55,TXN1,MIOS,CMTR1,MRPL36,MCM4,FANCL,TFB1M,TUFM,ELP3,TYMS,PAK1IP1,BANF1,CHCHD5,SBDS,MRPL17,EIF6,HNRNPU,TIMM17A,XRCC3,TIMM10,SMC6,UROD,TIMM50,DUT,NARS2,SMC5,SARS2,MAK16,PRMT1,PABPN1,D…
nuclear lumen	GO:0031981	5e-324	323.306	4120	2754	1355	21187	PKMYT1,VRK1,HIST1H2AE,NDOR1,HIST1H2AN,RABGGTA,COA7,PRPF19,FDPS,REXO2,RAD9A,METTL14,ZPR1,CPSF3,ELP5,MRPL52,UBA1,WDR82,PRMT5,FAM96B,TBCA,HSCB,FEN1,VHL,GTF3C1,BCCIP,THOC3,KAT8,DR1,PPIL2,DDX55,TXN1,MIOS,CMTR1,MRPL36,MCM4,FANCL,ELP3,TYMS,PAK1IP1,BANF1,SBDS,EIF6,HNRNPU,TIMM17A,XRCC3,SMC6,UROD,TIMM50,DUT,NARS2,SMC5,MAK16,PRMT1,PABPN1,DDX5,POU5F1,RTCB,RBBP4,DCAF7,NR0B1,STK11,COPS3,TELO2,DNAJC2,METTL17,SM…
protein-containing complex	GO:0032991	5e-324	323.306	5309	2754	1615	21187	HSD17B10,PNPT1,EEFSEC,HIST1H2AE,HIST1H2AN,RABGGTA,PRPF19,RAD9A,ATP5A1,VPS29,METTL14,CTU1,PPP2R1A,CPSF3,ELP5,MRPL15,MRPL52,WDR82,PRMT5,FAM96B,GOLT1B,PPP2CA,CLTC,FEN1,VHL,GTF3C1,NDUFA8,BCCIP,CHMP6,THOC3,KAT8,DR1,SKIV2L,MIOS,ATP6V1A,MRPL36,MCM4,SNRNP35,FANCL,IKBKAP,NDUFA3,EXOC7,ATP6V1B2,RIOK1,ELP3,PDRG1,EIF2S3X,MRPL17,EIF6,RABGGTB,HNRNPU,TIMM17A,XRCC3,TIMM10,SMC6,ATP1A1,TIMM50,ELP6,SMC5,MAK16,SCAP,B…
intracellular organelle lumen	GO:0070013	5e-324	323.306	4630	2754	1519	21187	PKMYT1,PNPT1,VRK1,HIST1H2AE,NDOR1,HIST1H2AN,RABGGTA,COA7,PRPF19,FDPS,REXO2,RAD9A,METTL14,MTG2,GLRX5,ZPR1,CPSF3,ELP5,MRPL15,MRPL52,UBA1,WDR82,PRMT5,FAM96B,TBCA,HSCB,FEN1,VHL,GTF3C1,NDUFA8,BCCIP,THOC3,KAT8,DR1,PPIL2,DDX55,TXN1,MIOS,CMTR1,MRPL36,MCM4,FANCL,TFB1M,TUFM,ELP3,TYMS,PAK1IP1,BANF1,CHCHD5,SBDS,MRPL17,EIF6,HNRNPU,TIMM17A,XRCC3,TIMM10,SMC6,UROD,TIMM50,DUT,NARS2,SMC5,SARS2,MAK16,PRMT1,PABPN1,D…
membrane-enclosed lumen	GO:0031974	5e-324	323.306	4631	2754	1519	21187	PKMYT1,PNPT1,VRK1,HIST1H2AE,NDOR1,HIST1H2AN,RABGGTA,COA7,PRPF19,FDPS,REXO2,RAD9A,METTL14,MTG2,GLRX5,ZPR1,CPSF3,ELP5,MRPL15,MRPL52,UBA1,WDR82,PRMT5,FAM96B,TBCA,HSCB,FEN1,VHL,GTF3C1,NDUFA8,BCCIP,THOC3,KAT8,DR1,PPIL2,DDX55,TXN1,MIOS,CMTR1,MRPL36,MCM4,FANCL,TFB1M,TUFM,ELP3,TYMS,PAK1IP1,BANF1,CHCHD5,SBDS,MRPL17,EIF6,HNRNPU,TIMM17A,XRCC3,TIMM10,SMC6,UROD,TIMM50,DUT,NARS2,SMC5,SARS2,MAK16,PRMT1,PABPN1,D…
intracellular membrane-bounded organelle	GO:0043231	5e-324	323.306	10495	2754	2301	21187	HSD17B10,HMBS,PKMYT1,PNPT1,VRK1,EEFSEC,HIST1H2AE,NDOR1,HIST1H2AN,RABGGTA,COA7,PRPF19,FDPS,REXO2,NSF,RAD9A,ATP5A1,VPS29,METTL14,CTU1,MTG2,NUBP2,PPP2R1A,GLRX5,ZPR1,CPSF3,ELP5,NDUFAF7,SLC25A37,MRPL15,MRPL52,UBA1,WDR82,NUBPL,PRMT5,FAM96B,SEPSECS,TBCA,GOLT1B,HSCB,PPP2CA,CLTC,FEN1,SCO2,VHL,IPO13,GTF3C1,NDUFA8,BCCIP,THOC3,KAT8,DR1,PPIL2,DDX55,TXN1,MIOS,CMTR1,ATP6V1A,MRPL36,MCM4,SNRNP35,FANCL,TFB1M,IKBKA…
intracellular organelle	GO:0043229	1.251027918e-314	313.903	12220	2754	2445	21187	HSD17B10,HMBS,PKMYT1,PNPT1,VRK1,EEFSEC,HIST1H2AE,NDOR1,HIST1H2AN,RABGGTA,COA7,PRPF19,FDPS,REXO2,NSF,RAD9A,ATP5A1,VPS29,METTL14,CTU1,MTG2,NUBP2,PPP2R1A,GLRX5,ZPR1,CPSF3,ELP5,NDUFAF7,SLC25A37,MRPL15,MRPL52,UBA1,WDR82,NUBPL,PRMT5,FAM96B,SEPSECS,TBCA,GOLT1B,HSCB,PPP2CA,CLTC,FEN1,SCO2,VHL,IPO13,GTF3C1,NDUFA8,BCCIP,CHMP6,THOC3,KAT8,DR1,PPIL2,DDX55,TXN1,WDR73,MIOS,CMTR1,ATP6V1A,MRPL36,MCM4,SNRNP35,FANCL…
membrane-bounded organelle	GO:0043227	1.3891e-305	304.857	11238	2754	2334	21187	HSD17B10,HMBS,PKMYT1,PNPT1,VRK1,EEFSEC,HIST1H2AE,NDOR1,HIST1H2AN,RABGGTA,COA7,PRPF19,FDPS,REXO2,NSF,RAD9A,ATP5A1,VPS29,METTL14,CTU1,MTG2,NUBP2,PPP2R1A,GLRX5,ZPR1,CPSF3,ELP5,NDUFAF7,SLC25A37,MRPL15,MRPL52,UBA1,WDR82,NUBPL,PRMT5,FAM96B,SEPSECS,TBCA,GOLT1B,HSCB,PPP2CA,CLTC,FEN1,SCO2,VHL,IPO13,GTF3C1,NDUFA8,BCCIP,CHMP6,THOC3,KAT8,DR1,PPIL2,DDX55,TXN1,MIOS,CMTR1,ATP6V1A,MRPL36,MCM4,SNRNP35,FANCL,TFB1M…
intracellular	GO:0005622	2.99334e-300	299.524	13902	2754	2579	21187	HSD17B10,HMBS,OXSR1,PKMYT1,PNPT1,VRK1,EEFSEC,HIST1H2AE,NDOR1,HIST1H2AN,RABGGTA,COA7,PRPF19,FDPS,REXO2,NSF,RAD9A,ATP5A1,VPS29,METTL14,CTU1,MTG2,NUBP2,PPP2R1A,GLRX5,ZPR1,CPSF3,ELP5,NDUFAF7,SLC25A37,MRPL15,MRPL52,UBA1,WDR82,NUBPL,PRMT5,FAM96B,SEPSECS,TBCA,GOLT1B,HSCB,PPP2CA,CLTC,FEN1,SCO2,VHL,IPO13,GTF3C1,NDUFA8,BCCIP,CHMP6,THOC3,KAT8,DR1,PPIL2,NRBP1,DDX55,TXN1,WDR73,SKIV2L,MIOS,CMTR1,ATP6V1A,CLUH,M…
organelle	GO:0043226	4.29462e-293	292.367	12582	2754	2454	21187	HSD17B10,HMBS,PKMYT1,PNPT1,VRK1,EEFSEC,HIST1H2AE,NDOR1,HIST1H2AN,RABGGTA,COA7,PRPF19,FDPS,REXO2,NSF,RAD9A,ATP5A1,VPS29,METTL14,CTU1,MTG2,NUBP2,PPP2R1A,GLRX5,ZPR1,CPSF3,ELP5,NDUFAF7,SLC25A37,MRPL15,MRPL52,UBA1,WDR82,NUBPL,PRMT5,FAM96B,SEPSECS,TBCA,GOLT1B,HSCB,PPP2CA,CLTC,FEN1,SCO2,VHL,IPO13,GTF3C1,NDUFA8,BCCIP,CHMP6,THOC3,KAT8,DR1,PPIL2,DDX55,TXN1,WDR73,MIOS,CMTR1,ATP6V1A,MRPL36,MCM4,SNRNP35,FANCL…
nucleus	GO:0005634	1.18091e-274	273.928	7002	2754	1757	21187	HMBS,PKMYT1,PNPT1,VRK1,EEFSEC,HIST1H2AE,NDOR1,HIST1H2AN,RABGGTA,COA7,PRPF19,FDPS,REXO2,RAD9A,ATP5A1,METTL14,NUBP2,PPP2R1A,GLRX5,ZPR1,CPSF3,ELP5,MRPL52,UBA1,WDR82,PRMT5,FAM96B,SEPSECS,TBCA,HSCB,PPP2CA,FEN1,VHL,IPO13,GTF3C1,BCCIP,THOC3,KAT8,DR1,PPIL2,DDX55,TXN1,MIOS,CMTR1,MRPL36,MCM4,SNRNP35,FANCL,IKBKAP,CENPM,L3MBTL2,ELP3,TYMS,PAK1IP1,DDX49,BANF1,SBDS,EIF6,RTEL1,HNRNPU,TIMM17A,XRCC3,SMC6,UROD,PGRM…
nucleoplasm	GO:0005654	1.3471e-263	262.871	3461	2754	1153	21187	PKMYT1,VRK1,NDOR1,RABGGTA,COA7,PRPF19,FDPS,RAD9A,METTL14,ZPR1,CPSF3,ELP5,MRPL52,UBA1,WDR82,PRMT5,FAM96B,HSCB,FEN1,VHL,GTF3C1,BCCIP,THOC3,KAT8,DR1,PPIL2,DDX55,TXN1,MIOS,CMTR1,MRPL36,MCM4,FANCL,BANF1,SBDS,EIF6,HNRNPU,TIMM17A,XRCC3,SMC6,UROD,TIMM50,DUT,NARS2,SMC5,PRMT1,PABPN1,POU5F1,RTCB,RBBP4,DCAF7,NR0B1,STK11,COPS3,TELO2,METTL17,SMC2,SKP1A,GRWD1,MAX,IPO7,MED26,FAM98B,DPH6,MRE11A,MED20,CPSF1,NCBP1,…
ribonucleoprotein complex	GO:1990904	1.50585e-231	230.822	720	2754	460	21187	HSD17B10,PNPT1,EEFSEC,PRPF19,MRPL15,MRPL52,GTF3C1,MRPL36,SNRNP35,RIOK1,MRPL17,EIF6,HNRNPU,MAK16,PABPN1,DDX5,NR0B1,LSM8,TEFM,RPLP0,MRPL55,NSUN3,NCBP1,MRPL53,LRPPRC,RNPC3,SF3B4,MRPS16,SRP72,EIF3F,HSPA14,DCAF13,DDX3X,RUVBL2,AAR2,SNRNP40,SNRPC,MRPL43,MRPL12,MRPL27,DHX29,U2AF1,ACTB,SF1,RSL24D1,MRPS21,EIF3K,DAP3,MRPL44,EIF3D,PABPC1,MRTO4,SF3A2,PRPF38A,BOP1,TARDBP,EIF3A,POP4,JMJD6,CWC22,WDR12,TOP2A,SRSF…
intracellular non-membrane-bounded organelle	GO:0043232	6.31837e-202	201.199	4377	2754	1223	21187	HMBS,PKMYT1,PNPT1,VRK1,HIST1H2AE,NDOR1,HIST1H2AN,PRPF19,REXO2,RAD9A,MTG2,NUBP2,PPP2R1A,ZPR1,MRPL15,MRPL52,UBA1,WDR82,FAM96B,TBCA,PPP2CA,CLTC,FEN1,SCO2,VHL,GTF3C1,BCCIP,THOC3,KAT8,DDX55,WDR73,MRPL36,TFB1M,CENPM,TUFM,EXOC7,ELP3,TYMS,PAK1IP1,BANF1,SBDS,MRPL17,EIF6,RTEL1,HNRNPU,XRCC3,SMC6,SMC5,MAK16,G6PDX,DDX5,POU5F1,RBBP4,NUP43,NR0B1,STK11,TELO2,POLRMT,DNAJC2,METTL17,SMC2,SKP1A,GRWD1,PYROXD1,ATAD3A,…
non-membrane-bounded organelle	GO:0043228	2.03811e-200	199.691	4392	2754	1223	21187	HMBS,PKMYT1,PNPT1,VRK1,HIST1H2AE,NDOR1,HIST1H2AN,PRPF19,REXO2,RAD9A,MTG2,NUBP2,PPP2R1A,ZPR1,MRPL15,MRPL52,UBA1,WDR82,FAM96B,TBCA,PPP2CA,CLTC,FEN1,SCO2,VHL,GTF3C1,BCCIP,THOC3,KAT8,DDX55,WDR73,MRPL36,TFB1M,CENPM,TUFM,EXOC7,ELP3,TYMS,PAK1IP1,BANF1,SBDS,MRPL17,EIF6,RTEL1,HNRNPU,XRCC3,SMC6,SMC5,MAK16,G6PDX,DDX5,POU5F1,RBBP4,NUP43,NR0B1,STK11,TELO2,POLRMT,DNAJC2,METTL17,SMC2,SKP1A,GRWD1,PYROXD1,ATAD3A,…
catalytic complex	GO:1902494	8.77295e-149	148.057	1372	2754	549	21187	HSD17B10,PNPT1,RABGGTA,PRPF19,METTL14,PPP2R1A,WDR82,PRMT5,PPP2CA,VHL,NDUFA8,BCCIP,KAT8,DR1,NDUFA3,RIOK1,RABGGTB,HNRNPU,SMC6,SMC5,BRAP,PRMT1,DDX5,RBBP4,DCAF7,POLRMT,SKP1A,MAX,CRCP,MED20,PSMD14,ERH,HDAC1,NDUFS2,MED12,TRMT61A,SMARCC1,SMARCE1,CLP1,POLR3B,RNF40,NDUFA2,DCAF13,GTF2B,RUVBL2,TMEM258,SNRNP40,DLST,PPP4C,UQCRC1,RBX1,NAA15,HDAC3,ADAT3,PDSS1,POLD2,MAT2A,ACTB,PSMB6,SETD5,MED7,GTF2A1,SAP130,POLR…
nucleolus	GO:0005730	8.07698e-125	124.093	898	2754	401	21187	PKMYT1,VRK1,REXO2,ZPR1,WDR82,TBCA,FEN1,VHL,GTF3C1,DDX55,ELP3,TYMS,PAK1IP1,SBDS,EIF6,MAK16,DDX5,POU5F1,DNAJC2,SMC2,GRWD1,DPH6,SF3B4,DHX33,SRP72,CTCF,DCAF13,ESF1,HSPA9,ORC6,TRAIP,DIMT1,MTX2,APEX1,RSL24D1,MRTO4,SDHA,BOP1,EIF3A,SNAPC1,POP4,JMJD6,WDR12,TOP2A,ILF2,PDCD11,NOL10,ANAPC11,SIN3A,EXOSC10,PARP1,UBE2N,UTP15,DDX54,PIH1D1,NLE1,MRPS27,MDN1,XRCC6,EMG1,WDR18,RPL12,DKC1,DDX28,PWP1,RAN,EEF1A1,DIS3,DD…
chromosome	GO:0005694	2.93836e-111	110.532	1189	2754	453	21187	HMBS,HIST1H2AE,HIST1H2AN,PRPF19,RAD9A,PPP2R1A,UBA1,WDR82,PPP2CA,CLTC,FEN1,THOC3,KAT8,CENPM,BANF1,RTEL1,HNRNPU,XRCC3,SMC6,SMC5,POU5F1,RBBP4,NUP43,TELO2,SMC2,GRWD1,MAX,MRE11A,UXT,HDAC1,LRPPRC,SMARCC1,SMARCE1,CENPA,RFC2,ORC5,RNF40,CTCF,GTF2B,RUVBL2,ACTR3,GINS2,CENPN,MMS22L,ZW10,ORC6,MCM2,POLD2,RAD51D,KDM8,TCP1,RAD51,BIRC5,TEN1,SETD5,RCC1,ELL,SAP130,NUP85,HIST2H3C1,ACTR2,HIST1H4H,ERCC4,ARPC4,KIF2C,PO…
ribosome	GO:0005840	8.29042e-104	103.081	244	2754	180	21187	PNPT1,MTG2,MRPL15,MRPL52,MRPL36,MRPL17,NR0B1,METTL17,RPLP0,MRPL55,NSUN3,MRPL53,MRPS16,MTG1,HSPA14,DDX3X,MRPL43,MRPL12,MRPL27,DHX29,RSL24D1,MRPS21,DAP3,MRPL44,MRPL39,EEF2,MRPS2,MRPS27,RPL10,MRPS18B,RPL12,RPL36A,MRPL9,MRPL2,MRPL14,FAU,MRPL57,MRPS25,BTF3,RPL5,2810006K23RIK,RPS4X,RPLP2,RPL8,RPL14,MRPL11,RPS2,RPL29,MRPL49,EIF3H,UBA52,RPS24,RPS16,MRPL37,RPL37A,RPLP1,MRPS33,MRPL33,RPS27,MRPL3,RPL28,MRPS…
ribosomal subunit	GO:0044391	4.77319e-102	101.321	204	2754	162	21187	MRPL15,MRPL52,MRPL36,MRPL17,RPLP0,MRPL55,NSUN3,MRPL53,MRPS16,DDX3X,MRPL43,MRPL12,MRPL27,DHX29,RSL24D1,MRPS21,DAP3,MRPL44,MRPL39,MRPS2,MRPS27,RPL10,MRPS18B,RPL12,RPL36A,MRPL9,MRPL2,MRPL14,FAU,MRPL57,MRPS25,RPL5,2810006K23RIK,RPS4X,RPLP2,RPL8,RPL14,MRPL11,RPS2,RPL29,MRPL49,UBA52,RPS24,RPS16,MRPL37,RPL37A,RPLP1,MRPS33,MRPL33,RPS27,MRPL3,RPL28,MRPS34,RPL30,MALSU1,MRPS5,NDUFAB1,RPL19,MRPL10,MRPL41,MRP…
mitochondrial protein complex	GO:0098798	3.61892e-84	83.4414	269	2754	173	21187	HSD17B10,PNPT1,ATP5A1,MRPL15,MRPL52,NDUFA8,MRPL36,NDUFA3,MRPL17,TIMM17A,TIMM10,TIMM50,POLRMT,MRPL55,NSUN3,MRPL53,VDAC1,NDUFS2,MRPS16,NDUFA2,TOMM22,MRPL43,MRPL12,UQCRC1,MRPL27,MTX2,MRPS21,DNAJC11,DAP3,MINOS1,MRPL44,SDHA,MFN1,MRPL39,NDUFC1,MRPS2,NDUFB9,DNAJC15,MRPS27,MRPS18B,MRPL9,NDUFS3,MRPL2,MRPL14,PMPCB,MRPL57,NDUFS7,MRPS25,NDUFA1,2810006K23RIK,PAM16,DNA2,NDUFA6,ATP5H,NDUFS8,NDUFS1,ATP5B,MRPL11,…
mitochondrion	GO:0005739	5.55721e-84	83.2551	1814	2754	538	21187	HSD17B10,PNPT1,EEFSEC,COA7,FDPS,REXO2,ATP5A1,CTU1,MTG2,GLRX5,NDUFAF7,SLC25A37,MRPL15,MRPL52,UBA1,NUBPL,HSCB,CLTC,FEN1,SCO2,VHL,NDUFA8,TXN1,ATP6V1A,MRPL36,TFB1M,TUFM,NDUFA3,SLC25A26,TYMS,RTN4IP1,ISCA2,CHCHD5,MRPL17,TIMM17A,XRCC3,TMEM11,TIMM10,ISCA1,TIMM50,DUT,NARS2,TXNRD2,SARS2,CLPP,PET117,MECR,POU5F1,STK11,HARS,POLRMT,METTL17,LETM1,YKT6,SLC25A28,ATAD3A,TEFM,TFRC,MRPL55,PARS2,PPOX,NSUN3,NCBP1,PGS1…
cytoplasm	GO:0005737	6.79383e-81	80.1679	10872	2754	1881	21187	HSD17B10,HMBS,OXSR1,PKMYT1,PNPT1,VRK1,EEFSEC,NDOR1,RABGGTA,COA7,PRPF19,FDPS,REXO2,NSF,RAD9A,ATP5A1,VPS29,CTU1,MTG2,NUBP2,PPP2R1A,GLRX5,ZPR1,ELP5,NDUFAF7,SLC25A37,MRPL15,MRPL52,UBA1,NUBPL,PRMT5,FAM96B,SEPSECS,TBCA,GOLT1B,HSCB,PPP2CA,CLTC,FEN1,SCO2,VHL,IPO13,NDUFA8,BCCIP,CHMP6,PPIL2,NRBP1,DDX55,TXN1,WDR73,SKIV2L,MIOS,CMTR1,ATP6V1A,CLUH,MRPL36,FANCL,TFB1M,IKBKAP,CENPM,TUFM,NDUFA3,EXOC7,ATP6V1B2,RIOK…
transferase complex	GO:1990234	7.14515e-77	76.146	757	2754	301	21187	RABGGTA,METTL14,WDR82,PRMT5,VHL,BCCIP,KAT8,DR1,RIOK1,RABGGTB,SMC6,SMC5,BRAP,PRMT1,RBBP4,DCAF7,POLRMT,SKP1A,MAX,CRCP,MED20,ERH,MED12,TRMT61A,POLR3B,RNF40,DCAF13,GTF2B,RUVBL2,TMEM258,DLST,RBX1,NAA15,PDSS1,POLD2,MAT2A,ACTB,SETD5,MED7,GTF2A1,POLR3F,MED10,POLA2,PCNA,CDK7,SPOP,LZTR1,ANAPC1,ANAPC11,DHDDS,TADA1,ERCC2,UBE2N,ARIH1,POLE3,GTF2E2,POLR2A,POLR2J,YEATS4,CXXC1,POLR3H,POLR3K,RPRD1B,POLR1D,POLR3A,P…
nuclear body	GO:0016604	1.68028e-76	75.7746	776	2754	305	21187	PRPF19,ZPR1,THOC3,MRPL36,FANCL,HNRNPU,SMC6,TIMM50,SMC5,PABPN1,DCAF7,NR0B1,TELO2,MAX,MRE11A,ITPA,ATPAF2,YARS,GEMIN6,ASCC3,GTF2B,VPS72,SNRNP40,SNRPC,EAF1,LARS,U2AF1,RAD51,APEX1,SF1,MED7,SDE2,ELL,SAP130,SF3A2,PCNA,SPOP,CWC22,SRSF1,LSM11,PPIH,DBF4,NXT1,DDX42,PARP1,ATR,ARIH1,COPS4,RFWD3,DKC1,GTF2E2,RIF1,NDUFS3,PHAX,CXXC1,SNRPA1,SRSF3,INCENP,PRPF6,PPIE,TUT1,THOC6,ORC3,ALYREF,MAGOH,LSM10,SNAPC5,SF3A3,CD…
cytosol	GO:0005829	2.12566e-69	68.6725	3727	2754	840	21187	OXSR1,PNPT1,VRK1,EEFSEC,NDOR1,FDPS,NSF,VPS29,CTU1,NUBP2,PPP2R1A,ELP5,UBA1,PRMT5,FAM96B,TBCA,HSCB,PPP2CA,CLTC,VHL,BCCIP,DDX55,TXN1,WDR73,MIOS,CMTR1,ATP6V1A,IKBKAP,CENPM,EXOC7,ATP6V1B2,RIOK1,ELP3,TYMS,EIF2S3X,BANF1,SBDS,EIF6,XRCC3,UROD,DUT,NARS2,ELP6,PAICS,TXNRD2,BRAP,G6PDX,PRMT1,MECR,CDC37,POU5F1,RTCB,RBBP4,DARS,DCAF7,STK11,HARS,MOCS3,COPS3,TELO2,DNAJC2,SKP1A,YKT6,GRWD1,IPO7,HSPA4,IARS,RPLP0,PSMD1…
mitochondrial matrix	GO:0005759	4.50837e-64	63.346	339	2754	175	21187	PNPT1,FDPS,REXO2,MTG2,GLRX5,MRPL15,MRPL52,MRPL36,TFB1M,TUFM,TYMS,MRPL17,XRCC3,NARS2,SARS2,CLPP,POLRMT,ATAD3A,TEFM,MRPL55,PARS2,NSUN3,MRPL53,LRPPRC,VDAC1,MRPS16,MTG1,ISCU,NFS1,HSPA9,MRPL43,TSFM,MARS2,MRPL12,TRUB2,DLST,MRPL27,DIMT1,SSBP1,RAD51,MRPS21,FARS2,DAP3,MRPL44,COQ5,RARS2,MRPL39,MRPS2,DNAJC15,MRPS27,MRPS18B,PITRM1,DDX28,DNAJA3,MRPL9,MRPL2,MRPL14,ERAL1,IBA57,PMPCB,MRPL57,RPUSD4,MRPS25,TIMM44,…
large ribosomal subunit	GO:0015934	9.53659e-62	61.0206	129	2754	101	21187	MRPL15,MRPL52,MRPL36,MRPL17,RPLP0,MRPL55,NSUN3,MRPL53,MRPL43,MRPL12,MRPL27,RSL24D1,MRPL44,MRPL39,RPL10,RPL12,RPL36A,MRPL9,MRPL2,MRPL14,MRPL57,RPL5,2810006K23RIK,RPLP2,RPL8,RPL14,MRPL11,RPL29,MRPL49,UBA52,MRPL37,RPL37A,RPLP1,MRPL33,MRPL3,RPL28,RPL30,MALSU1,NDUFAB1,RPL19,MRPL10,MRPL41,MRPS18A,RPL6,MRPL28,RPL7A,RPL18,RPL11,MRPL54,RPL7L1,RPL24,MRPL4,MRPL48,MRPL18,MRPL16,NSUN4,RPL27A,RPL32,MRPL38,RPL3…
organellar ribosome	GO:0000313	1.04346e-60	59.9815	94	2754	84	21187	MTG2,MRPL15,MRPL52,MRPL36,MRPL17,MRPL55,NSUN3,MRPL53,MRPS16,MTG1,MRPL43,MRPL12,MRPL27,MRPS21,DAP3,MRPL44,MRPL39,MRPS2,MRPS27,MRPS18B,MRPL9,MRPL2,MRPL14,MRPL57,MRPS25,2810006K23RIK,MRPL11,MRPL49,MRPL37,MRPS33,MRPL33,MRPL3,MRPS34,MALSU1,MRPS5,NDUFAB1,MRPL10,MRPL41,MRPS18A,MRPL28,MRPL54,MRPL4,MRPL48,MRPL18,MRPL16,NSUN4,MRPS15,MRPS28,MRPS6,MRPL38,MRPS9,MRPL51,MRPS10,MRPL19,MRPS7,MRPL46,MRPS36,MRPS11,…
mitochondrial ribosome	GO:0005761	1.04346e-60	59.9815	94	2754	84	21187	MTG2,MRPL15,MRPL52,MRPL36,MRPL17,MRPL55,NSUN3,MRPL53,MRPS16,MTG1,MRPL43,MRPL12,MRPL27,MRPS21,DAP3,MRPL44,MRPL39,MRPS2,MRPS27,MRPS18B,MRPL9,MRPL2,MRPL14,MRPL57,MRPS25,2810006K23RIK,MRPL11,MRPL49,MRPL37,MRPS33,MRPL33,MRPL3,MRPS34,MALSU1,MRPS5,NDUFAB1,MRPL10,MRPL41,MRPS18A,MRPL28,MRPL54,MRPL4,MRPL48,MRPL18,MRPL16,NSUN4,MRPS15,MRPS28,MRPS6,MRPL38,MRPS9,MRPL51,MRPS10,MRPL19,MRPS7,MRPL46,MRPS36,MRPS11,…
spliceosomal complex	GO:0005681	9.1098e-60	59.0405	210	2754	130	21187	PRPF19,SNRNP35,HNRNPU,DDX5,LSM8,RNPC3,SF3B4,AAR2,SNRNP40,SNRPC,U2AF1,SF1,PABPC1,SF3A2,PRPF38A,CWC22,SRSF1,PPIH,LSM2,LSM7,PRPF38B,RBM22,HNRNPK,UPF1,SNRNP25,SNRPA1,CCDC94,PRPF6,PPIE,ALYREF,TXNL4A,MAGOH,HNRNPF,SF3A3,DDX23,SNRPE,PHF5A,PPP1R8,SNRPD2,CDC5L,SF3B3,WAC,SNRPG,U2AF2,SMU1,TFIP11,DDX41,LSM6,CRNKL1,PRPF8,TRA2B,PRPF40A,MFAP1B,CWF19L1,PRPF3,TTF2,SKIV2L2,EFTUD2,DHX35,DHX8,SNRPD1,DHX15,SF3B5,SNRNP…
chromosomal region	GO:0098687	2.87534e-58	57.5413	307	2754	159	21187	PPP2R1A,WDR82,PPP2CA,FEN1,THOC3,KAT8,CENPM,RTEL1,HNRNPU,SMC6,SMC5,NUP43,TELO2,MRE11A,CENPA,CTCF,CENPN,ZW10,RAD51D,RAD51,BIRC5,TEN1,NUP85,ERCC4,KIF2C,SIN3A,DCTN5,CHEK1,BUB3,UPF1,SMC3,RIF1,INCENP,THOC6,DNA2,KNTC1,KIF18A,THOC1,DCTN6,RNF8,SKA2,DNMT1,SPC24,AHCTF1,CSNK1A1,MIS12,TINF2,MEAF6,RPA1,TFIP11,DCLRE1B,DHX36,CENPO,POLD1,CENPW,CDT1,NGDN,RANGAP1,PLK1,NUP107,XPO1,DAXX,CHAMP1,MIS18BP1,ERCC6L,DSCC1,S…
nuclear chromosome	GO:0000228	9.83909e-48	47.007	728	2754	248	21187	HIST1H2AE,HIST1H2AN,PRPF19,RAD9A,WDR82,FEN1,THOC3,KAT8,HNRNPU,POU5F1,RBBP4,TELO2,SMC2,MAX,MRE11A,HDAC1,LRPPRC,SMARCC1,SMARCE1,CENPA,ORC5,RUVBL2,GINS2,MMS22L,ORC6,MCM2,POLD2,RAD51D,TCP1,RAD51,BIRC5,TEN1,SETD5,RCC1,SAP130,HIST2H3C1,HIST1H4H,ERCC4,POLA2,HIST1H3F,NCOA3,PCNA,ALDOA,TOP2A,SIN3A,HNRNPK,CHEK1,POLE3,UPF1,TUBG1,PRDM10,SMC3,POLR2A,RIF1,SMARCA4,INCENP,THOC6,ORC3,RRS1,DNA2,KAT5,SMARCAD1,NIFK,S…
cytosolic ribosome	GO:0022626	2.17879e-42	41.6618	114	2754	80	21187	RPLP0,DDX3X,DHX29,RSL24D1,RPL10,RPL12,RPL36A,FAU,RPL5,RPS4X,RPLP2,RPL8,RPL14,RPS2,RPL29,UBA52,RPS24,RPS16,RPL37A,RPLP1,RPS27,RPL28,RPL30,RPL19,RPL6,RPL7A,RPL18,RPS10,RPL11,RPS9,RPS11,RPL7L1,RPS26,RPL24,RPS3,RPS18,NUFIP1,RPS5,RPL27A,RPSA,RPS8,RPL32,RPS13,RPS6,RPL39,RPL13,RPL10A,RPS21,RPS25,RPS12,RPS17,RPL38,RPL7,RPL36,RPS15A,RPL35,RPL26,RPL23A,RPS27A,RPL35A,RPS15,RPL37,RPS19,RPS14,RPL18A,RPS28,RPL…
chromatin	GO:0000785	6.67035e-42	41.1759	615	2754	213	21187	HIST1H2AE,HIST1H2AN,UBA1,WDR82,KAT8,POU5F1,RBBP4,TELO2,MAX,MRE11A,UXT,HDAC1,SMARCC1,SMARCE1,CENPA,ORC5,RNF40,RUVBL2,MCM2,TCP1,RAD51,SETD5,RCC1,ELL,SAP130,HIST2H3C1,HIST1H4H,HIST1H3F,NCOA3,PCNA,ALDOA,SIN3A,HNRNPK,EXOSC10,CHEK1,UPF1,PRDM10,RAN,SMC3,POLR2A,RIF1,EXOSC3,SMARCA4,INCENP,ORC3,KAT5,FAM208A,SMARCAD1,DDX23,SRCAP,STAT3,TBP,DNMT1,CSNK2B,TRIM28,HIST1H2BN,E2F4,HIST1H4N,AHCTF1,FAM60A,CTR9,DDX11,…
DNA-directed RNA polymerase complex	GO:0000428	8.83939e-42	41.0536	100	2754	74	21187	POLRMT,CRCP,POLR3B,GTF2B,SETD5,GTF2A1,POLR3F,POLA2,CDK7,ERCC2,GTF2E2,POLR2A,POLR2J,POLR3H,POLR3K,RPRD1B,POLR1D,POLR3A,POLR2I,GTF2F1,PSMC5,GTF2E1,TAF13,CDC73,PRIM1,MNAT1,TBP,TAF8,GTF2H2,CTR9,GTF2H3,POLR1C,PAF1,POLR1B,GTF2H1,POLR3C,TRRAP,RTF1,ERCC3,RPAP2,POLR2L,GTF2A2,POLR2H,TAF5,POLR2D,PRIM2,POLR2G,TAF6,TAF2,POLR2B,CD3EAP,POLR1A,WDR61,POLR2K,TAF7,CCNH,GTF2H4,TAF6L,POLR2F,TCEA1,PEX2,POLR3D,GTF2H5,P…
RNA polymerase complex	GO:0030880	1.60743e-41	40.7939	103	2754	75	21187	POLRMT,CRCP,POLR3B,GTF2B,SETD5,GTF2A1,POLR3F,POLA2,CDK7,ERCC2,GTF2E2,POLR2A,POLR2J,POLR3H,POLR3K,RPRD1B,POLR1D,POLR3A,POLR2I,GTF2F1,PSMC5,GTF2E1,TAF13,CDC73,PRIM1,MNAT1,TBP,TAF8,GTF2H2,CTR9,GTF2H3,POLR1C,PAF1,POLR1B,RPAP1,GTF2H1,POLR3C,TRRAP,RTF1,ERCC3,RPAP2,POLR2L,GTF2A2,POLR2H,TAF5,POLR2D,PRIM2,POLR2G,TAF6,TAF2,POLR2B,CD3EAP,POLR1A,WDR61,POLR2K,TAF7,CCNH,GTF2H4,TAF6L,POLR2F,TCEA1,PEX2,POLR3D,GT…
small ribosomal subunit	GO:0015935	4.20168e-41	40.3766	80	2754	65	21187	MRPS16,DDX3X,DHX29,MRPS21,DAP3,MRPS2,MRPS27,MRPS18B,FAU,MRPS25,RPS4X,RPS2,UBA52,RPS24,RPS16,MRPS33,RPS27,MRPS34,MRPS5,MRPS18A,RPS10,RPS9,RPS11,RPS26,RPS3,RPS18,RPS5,MRPS15,RPSA,RPS8,MRPS28,RPS13,MRPS6,RPS6,RPS21,RPS25,RPS12,RPS17,MRPS9,RPS15A,MRPS10,MRPS7,RPS27A,RPS15,MRPS36,RPS19,MRPS11,MRPS12,RPS14,MRPS26,MRPS22,MRPS23,RPS28,NPM1,MRPS24,RPS20,RPS23,RPS29,RPS7,MRPS18C,MRPL42,MRPS17,LARP4,RPS3A1,…
nuclear DNA-directed RNA polymerase complex	GO:0055029	5.14886e-41	40.2883	99	2754	73	21187	CRCP,POLR3B,GTF2B,SETD5,GTF2A1,POLR3F,POLA2,CDK7,ERCC2,GTF2E2,POLR2A,POLR2J,POLR3H,POLR3K,RPRD1B,POLR1D,POLR3A,POLR2I,GTF2F1,PSMC5,GTF2E1,TAF13,CDC73,PRIM1,MNAT1,TBP,TAF8,GTF2H2,CTR9,GTF2H3,POLR1C,PAF1,POLR1B,GTF2H1,POLR3C,TRRAP,RTF1,ERCC3,RPAP2,POLR2L,GTF2A2,POLR2H,TAF5,POLR2D,PRIM2,POLR2G,TAF6,TAF2,POLR2B,CD3EAP,POLR1A,WDR61,POLR2K,TAF7,CCNH,GTF2H4,TAF6L,POLR2F,TCEA1,PEX2,POLR3D,GTF2H5,POLR2E,G…
U2-type spliceosomal complex	GO:0005684	1.26393e-40	39.8983	90	2754	69	21187	PRPF19,LSM8,SF3B4,SNRNP40,SNRPC,SF3A2,PRPF38A,CWC22,LSM2,LSM7,RBM22,SNRPA1,CCDC94,PRPF6,PPIE,TXNL4A,SF3A3,SNRPE,PHF5A,SNRPD2,CDC5L,SF3B3,SNRPG,U2AF2,SMU1,TFIP11,LSM6,CRNKL1,PRPF8,PRPF40A,MFAP1B,PRPF3,EFTUD2,DHX8,SNRPD1,DHX15,SF3B5,SNRNP200,PRPF18,SNRPD3,SNRNP70,BUD13,SNRPF,LSM5,SNRPB2,PRPF4,RBMX2,EIF4A3,AQR,PPIL1,SF3A1,HTATSF1,RBM8A,ZMAT2,CWC25,SF3B2,SNRPB,SF3B1,CWC15,SNIP1,DHX16,WBP4,IK,LSM3,CCD…
nuclear speck	GO:0016607	2.15128e-40	39.6673	393	2754	159	21187	PRPF19,THOC3,HNRNPU,SMC6,TIMM50,SMC5,PABPN1,NR0B1,ATPAF2,ASCC3,VPS72,SNRNP40,EAF1,U2AF1,APEX1,SDE2,ELL,SAP130,SF3A2,SPOP,CWC22,SRSF1,PPIH,NXT1,DDX42,COPS4,GTF2E2,CXXC1,SNRPA1,SRSF3,PRPF6,PPIE,TUT1,THOC6,ALYREF,MAGOH,SF3A3,CD2BP2,THOC1,SRSF5,PHF5A,NOC3L,NCAPG2,PPP1R8,SRSF7,CDC5L,GTF2H2,CTR9,CSNK1A1,BCLAF1,WAC,U2AF2,SMU1,RBBP6,TFIP11,DHX36,CRNKL1,PRPF8,PRPF40A,SARNP,SMC4,PRPF3,DDX46,SKIV2L2,EFTUD2,…
organellar large ribosomal subunit	GO:0000315	1.03096e-39	38.9868	61	2754	55	21187	MRPL15,MRPL52,MRPL36,MRPL17,MRPL55,NSUN3,MRPL53,MRPL43,MRPL12,MRPL27,MRPL44,MRPL39,MRPL9,MRPL2,MRPL14,MRPL57,2810006K23RIK,MRPL11,MRPL49,MRPL37,MRPL33,MRPL3,MALSU1,NDUFAB1,MRPL10,MRPL41,MRPS18A,MRPL28,MRPL54,MRPL4,MRPL48,MRPL18,MRPL16,NSUN4,MRPL38,MRPL51,MRPL19,MRPL46,MRPL20,MRPL24,MRPL45,MRPL47,MRPL30,MPV17L2,MRPL23,MRPL50,MRPL42,MTERF4,MRPL40,MRPL1,MRPL35,MRPL13,MRPL32,MRPL34,MRPL22
mitochondrial large ribosomal subunit	GO:0005762	1.03096e-39	38.9868	61	2754	55	21187	MRPL15,MRPL52,MRPL36,MRPL17,MRPL55,NSUN3,MRPL53,MRPL43,MRPL12,MRPL27,MRPL44,MRPL39,MRPL9,MRPL2,MRPL14,MRPL57,2810006K23RIK,MRPL11,MRPL49,MRPL37,MRPL33,MRPL3,MALSU1,NDUFAB1,MRPL10,MRPL41,MRPS18A,MRPL28,MRPL54,MRPL4,MRPL48,MRPL18,MRPL16,NSUN4,MRPL38,MRPL51,MRPL19,MRPL46,MRPL20,MRPL24,MRPL45,MRPL47,MRPL30,MPV17L2,MRPL23,MRPL50,MRPL42,MTERF4,MRPL40,MRPL1,MRPL35,MRPL13,MRPL32,MRPL34,MRPL22
organelle envelope	GO:0031967	3.83318e-38	37.4164	1166	2754	317	21187	PNPT1,COA7,REXO2,ATP5A1,MTG2,SLC25A37,SCO2,NDUFA8,FANCL,TUFM,NDUFA3,SLC25A26,TYMS,RTN4IP1,BANF1,CHCHD5,MRPL17,TIMM17A,TMEM11,TIMM10,PGRMC2,TIMM50,BRAP,RTCB,NUP43,DNAJC2,LETM1,SLC25A28,ATAD3A,IPO7,PPOX,LRPPRC,VDAC1,NDUFS2,TRIAP1,MTG1,NDUFA2,TOMM22,COQ6,FDXR,NDUFAF6,OPA1,UQCRC1,TUBB5,MFN2,MTX2,PCID2,MRPS21,DNAJC11,RCC1,MINOS1,TNPO3,NUP85,SDHA,MFN1,SLC25A51,PRPF38A,COQ5,TAMM41,TMEM126B,NXT1,ACAD9,AC…
envelope	GO:0031975	4.62547e-38	37.3348	1167	2754	317	21187	PNPT1,COA7,REXO2,ATP5A1,MTG2,SLC25A37,SCO2,NDUFA8,FANCL,TUFM,NDUFA3,SLC25A26,TYMS,RTN4IP1,BANF1,CHCHD5,MRPL17,TIMM17A,TMEM11,TIMM10,PGRMC2,TIMM50,BRAP,RTCB,NUP43,DNAJC2,LETM1,SLC25A28,ATAD3A,IPO7,PPOX,LRPPRC,VDAC1,NDUFS2,TRIAP1,MTG1,NDUFA2,TOMM22,COQ6,FDXR,NDUFAF6,OPA1,UQCRC1,TUBB5,MFN2,MTX2,PCID2,MRPS21,DNAJC11,RCC1,MINOS1,TNPO3,NUP85,SDHA,MFN1,SLC25A51,PRPF38A,COQ5,TAMM41,TMEM126B,NXT1,ACAD9,AC…
transferase complex, transferring phosphorus-containing groups	GO:0061695	1.09865e-37	36.9591	242	2754	116	21187	BCCIP,POLRMT,CRCP,POLR3B,GTF2B,POLD2,SETD5,GTF2A1,POLR3F,POLA2,PCNA,CDK7,ERCC2,POLE3,GTF2E2,POLR2A,POLR2J,POLR3H,POLR3K,RPRD1B,POLR1D,POLR3A,POLR2I,DNA2,GTF2F1,PSMC5,GTF2E1,TAF13,CDC73,POLG,PRIM1,MNAT1,TBP,POLE,TAF8,GTF2H2,CTR9,POLE4,GTF2H3,POLR1C,PAF1,POLR1B,BRD4,RPAP1,GTF2H1,POLD1,PKM,POLR3C,TRRAP,PIK3C3,RTF1,ERCC3,CDK1,PIK3R2,PRKAR1A,RPAP2,POLR2L,CDK9,GTF2A2,POLR2H,TAF5,POLG2,CCNA2,PFKP,PIK3CA…
chromosome, centromeric region	GO:0000775	5.09294e-37	36.293	196	2754	102	21187	PPP2R1A,PPP2CA,KAT8,CENPM,HNRNPU,NUP43,CENPA,CTCF,CENPN,ZW10,BIRC5,NUP85,KIF2C,SIN3A,DCTN5,BUB3,SMC3,INCENP,KNTC1,KIF18A,DCTN6,SKA2,DNMT1,SPC24,AHCTF1,CSNK1A1,MIS12,MEAF6,CENPO,CENPW,CDT1,NGDN,RANGAP1,PLK1,NUP107,XPO1,DAXX,CHAMP1,MIS18BP1,ERCC6L,DSCC1,SEC13,DCTN2,PBRM1,NUP160,AURKA,CKAP5,NSL1,ZFP330,ESCO2,SPDL1,AURKB,CENPH,CENPK,OIP5,CENPU,ORC2,SMC1A,TPR,HELLS,SKA3,SPAG5,DCTN3,ZWILCH,MAD2L1,MAD1L…
Sm-like protein family complex	GO:0120114	2.49438e-35	34.603	71	2754	57	21187	LSM8,GEMIN6,SNRPC,SF3A2,LSM11,PPIH,LSM2,LSM7,TXNL4B,SNRPA1,PRPF6,TXNL4A,LSM10,SF3A3,DDX23,CD2BP2,SNRPE,SMN1,PHF5A,SNRPD2,GEMIN5,SNRPG,CLNS1A,LSM6,PRPF8,PRPF40A,PRPF3,GEMIN4,EFTUD2,SNRPD1,DDX20,SF3B5,SNRNP200,PRPF18,SNRPD3,SNRNP70,NOLC1,SNRPF,LSM5,SNRPB2,PRPF4,RBMX2,GEMIN7,SF3A1,HTATSF1,ZMAT2,GEMIN8,SLU7,SF3B2,SNRPB,SF3B1,GEMIN2,SART3,LSM3,USP39,LSM4,PRPF31
spindle	GO:0005819	9.38066e-34	33.0278	360	2754	141	21187	VRK1,PRPF19,NUBP2,FAM96B,PPP2CA,CLTC,BCCIP,WDR73,SBDS,HNRNPU,HAUS4,UXT,RACGAP1,PPP2R3C,ZW10,CIAO1,HDAC3,BIRC5,NUP85,KIF2C,TPT1,MMS19,ERCC2,RAE1,TUBG1,SMC3,RIF1,INCENP,CUL3,KNTC1,CDC16,KIF18A,KIF20B,SKA2,TUBGCP5,HAUS7,ECT2,CTDP1,DDX11,MAPRE1,KIF11,BIRC6,KIF23,MYC,E4F1,HAUS3,CDK1,NUMA1,RPS3,BORA,TPX2,TOPBP1,RANGAP1,DIDO1,PLK1,TUBGCP4,ARL8B,KIF18B,PTP4A1,CHAMP1,HAUS5,DYNLT1F,ATM,AURKA,CKAP5,TUBGCP2,…
kinetochore	GO:0000776	1.50658e-33	32.822	134	2754	79	21187	KAT8,CENPM,HNRNPU,NUP43,CENPA,CENPN,ZW10,BIRC5,NUP85,KIF2C,SIN3A,DCTN5,BUB3,INCENP,KNTC1,KIF18A,DCTN6,SKA2,SPC24,AHCTF1,CSNK1A1,MIS12,MEAF6,CENPO,CENPW,CDT1,RANGAP1,PLK1,NUP107,XPO1,CHAMP1,MIS18BP1,ERCC6L,SEC13,DCTN2,PBRM1,NUP160,CKAP5,NSL1,SPDL1,AURKB,CENPH,CENPK,CENPU,ORC2,SMC1A,TPR,SKA3,SPAG5,DCTN3,ZWILCH,MAD2L1,MAD1L1,ZWINT,PPP1R12A,MTBP,ZFP207,CENPC1,DCTN4,DCTN1,SKA1,PINX1,NEK2,DYNLL1,NDC80,…
preribosome	GO:0030684	1.59058e-33	32.7984	74	2754	57	21187	RIOK1,EIF6,MAK16,DCAF13,MRTO4,BOP1,WDR12,PDCD11,NOL10,MDN1,EMG1,RRS1,NOP14,WDR36,WDR3,RRP7A,PPAN,KRR1,FTSJ3,NOP58,IMP3,NOL6,IMP4,UTP18,NGDN,BMS1,PWP2,UTP23,NOC4L,NSA2,UTP14A,SRFBP1,RSL1D1,HEATR1,EBNA1BP2,WDR74,NOP56,NIP7,FCF1,RRP9,RRP1,RRP15,RPS7,BYSL,MPHOSPH10,FBL,WDR46,UTP6,MRPL1,TBL3,TSR1,RPF1,NOB1,LAS1L,PES1,LTV1,FAM207A
catalytic step 2 spliceosome	GO:0071013	7.91525e-31	30.1015	95	2754	63	21187	PRPF19,HNRNPU,DDX5,SNRNP40,PABPC1,SF3A2,CWC22,SRSF1,LSM2,LSM7,RBM22,HNRNPK,SNRPA1,PRPF6,PPIE,MAGOH,HNRNPF,SF3A3,DDX23,SNRPE,SNRPD2,CDC5L,SF3B3,SNRPG,TFIP11,DDX41,CRNKL1,PRPF8,SKIV2L2,EFTUD2,DHX35,DHX8,SNRPD1,SNRNP200,SNRPD3,DHX38,SNRPF,HNRNPA1,HNRNPC,SNRPB2,EIF4A3,CACTIN,AQR,PPIL1,SF3A1,WDR83,RBM8A,SLU7,SF3B2,SNRPB,SF3B1,DGCR14,CWC15,PRPF4B,GPATCH1,LSM3,ISY1,XAB2,SYNCRIP,PPWD1,PPIL3,FRG1,PNN
mitochondrial inner membrane	GO:0005743	1.59357e-30	29.7976	443	2754	155	21187	ATP5A1,MTG2,SLC25A37,SCO2,NDUFA8,TUFM,NDUFA3,SLC25A26,TYMS,MRPL17,TIMM17A,TMEM11,TIMM10,TIMM50,LETM1,SLC25A28,ATAD3A,PPOX,VDAC1,NDUFS2,MTG1,NDUFA2,TOMM22,COQ6,FDXR,NDUFAF6,OPA1,UQCRC1,MRPS21,DNAJC11,MINOS1,SDHA,MFN1,SLC25A51,COQ5,TAMM41,ACAD9,NDUFC1,TMEM70,NDUFB9,DNAJC15,COX15,COX7B,NDUFS3,CDS2,ERAL1,PMPCB,NDUFS7,NDUFA1,ABCB7,SLC25A19,TIMM44,STOML2,PAM16,NDUFA6,COQ2,ATP5H,NDUFS8,NDUFS1,COX18,ATP5…
precatalytic spliceosome	GO:0071011	1.84912e-30	29.733	52	2754	45	21187	LSM8,SF3B4,SF3A2,PRPF38A,CWC22,LSM2,LSM7,PRPF38B,SNRPA1,PRPF6,TXNL4A,SF3A3,SNRPE,PHF5A,SNRPD2,SF3B3,SNRPG,SMU1,LSM6,PRPF8,MFAP1B,PRPF3,EFTUD2,SNRPD1,SF3B5,SNRNP200,SNRPD3,BUD13,SNRPF,LSM5,SNRPB2,PRPF4,RBMX2,SF3A1,ZMAT2,SF3B2,SNRPB,SF3B1,SNIP1,DHX16,WBP4,IK,LSM3,LSM4,PRPF31
U2-type precatalytic spliceosome	GO:0071005	1.24868e-29	28.9035	51	2754	44	21187	LSM8,SF3B4,SF3A2,PRPF38A,CWC22,LSM2,LSM7,SNRPA1,PRPF6,TXNL4A,SF3A3,SNRPE,PHF5A,SNRPD2,SF3B3,SNRPG,SMU1,LSM6,PRPF8,MFAP1B,PRPF3,EFTUD2,SNRPD1,SF3B5,SNRNP200,SNRPD3,BUD13,SNRPF,LSM5,SNRPB2,PRPF4,RBMX2,SF3A1,ZMAT2,SF3B2,SNRPB,SF3B1,SNIP1,DHX16,WBP4,IK,LSM3,LSM4,PRPF31
small nuclear ribonucleoprotein complex	GO:0030532	2.07956e-29	28.682	60	2754	48	21187	LSM8,SNRPC,SF3A2,LSM11,PPIH,LSM2,LSM7,TXNL4B,SNRPA1,PRPF6,TXNL4A,LSM10,SF3A3,DDX23,CD2BP2,SNRPE,PHF5A,SNRPD2,SNRPG,LSM6,PRPF8,PRPF40A,PRPF3,EFTUD2,SNRPD1,SF3B5,SNRNP200,PRPF18,SNRPD3,SNRNP70,NOLC1,SNRPF,LSM5,SNRPB2,PRPF4,RBMX2,SF3A1,HTATSF1,ZMAT2,SLU7,SF3B2,SNRPB,SF3B1,SART3,LSM3,USP39,LSM4,PRPF31
mitochondrial envelope	GO:0005740	5.26794e-29	28.2784	714	2754	209	21187	PNPT1,COA7,REXO2,ATP5A1,MTG2,SLC25A37,SCO2,NDUFA8,TUFM,NDUFA3,SLC25A26,TYMS,RTN4IP1,CHCHD5,MRPL17,TIMM17A,TMEM11,TIMM10,TIMM50,LETM1,SLC25A28,ATAD3A,PPOX,VDAC1,NDUFS2,TRIAP1,MTG1,NDUFA2,TOMM22,COQ6,FDXR,NDUFAF6,OPA1,UQCRC1,MFN2,MTX2,MRPS21,DNAJC11,MINOS1,SDHA,MFN1,SLC25A51,COQ5,TAMM41,TMEM126B,ACAD9,ACSL4,NDUFC1,TMEM70,NDUFB9,DNAJC15,COX15,COX7B,COX10,NDUFS3,CDS2,DNM1L,ERAL1,PMPCB,NDUFS7,NDUFA1,A…
spliceosomal snRNP complex	GO:0097525	7.55441e-27	26.1218	55	2754	44	21187	LSM8,SNRPC,SF3A2,PPIH,LSM2,LSM7,TXNL4B,SNRPA1,PRPF6,TXNL4A,SF3A3,DDX23,CD2BP2,SNRPE,PHF5A,SNRPD2,SNRPG,LSM6,PRPF8,PRPF40A,PRPF3,EFTUD2,SNRPD1,SF3B5,SNRNP200,PRPF18,SNRPD3,SNRNP70,SNRPF,LSM5,SNRPB2,PRPF4,RBMX2,SF3A1,HTATSF1,ZMAT2,SF3B2,SNRPB,SF3B1,SART3,LSM3,USP39,LSM4,PRPF31
RNA polymerase II, holoenzyme	GO:0016591	3.0034e-26	25.5224	76	2754	52	21187	GTF2B,SETD5,GTF2A1,CDK7,ERCC2,GTF2E2,POLR2A,POLR2J,RPRD1B,POLR2I,GTF2F1,PSMC5,GTF2E1,TAF13,CDC73,MNAT1,TBP,TAF8,GTF2H2,CTR9,GTF2H3,PAF1,GTF2H1,TRRAP,RTF1,ERCC3,RPAP2,POLR2L,GTF2A2,POLR2H,TAF5,POLR2D,POLR2G,TAF6,TAF2,POLR2B,WDR61,POLR2K,TAF7,CCNH,GTF2H4,TAF6L,POLR2F,TCEA1,PEX2,GTF2H5,POLR2E,GTF2F2,TAF11,TADA3,TAF5L,SUPT3
organelle inner membrane	GO:0019866	4.82237e-26	25.3167	504	2754	160	21187	ATP5A1,MTG2,SLC25A37,SCO2,NDUFA8,TUFM,NDUFA3,SLC25A26,TYMS,MRPL17,TIMM17A,TMEM11,TIMM10,TIMM50,LETM1,SLC25A28,ATAD3A,PPOX,LRPPRC,VDAC1,NDUFS2,MTG1,NDUFA2,TOMM22,COQ6,FDXR,NDUFAF6,OPA1,UQCRC1,MRPS21,DNAJC11,MINOS1,SDHA,MFN1,SLC25A51,COQ5,TAMM41,ACAD9,NDUFC1,TMEM70,NDUFB9,DNAJC15,COX15,COX7B,NDUFS3,CDS2,ERAL1,PMPCB,NDUFS7,NDUFA1,ABCB7,SLC25A19,TIMM44,STOML2,PAM16,NDUFA6,COQ2,ATP5H,NDUFS8,NDUFS1,COX…
condensed chromosome	GO:0000793	7.52964e-26	25.1232	307	2754	116	21187	HMBS,RAD9A,CENPM,BANF1,HNRNPU,SMC6,SMC5,NUP43,SMC2,MRE11A,LRPPRC,CENPA,CTCF,CENPN,ZW10,RAD51,BIRC5,RCC1,NUP85,KIF2C,TOP2A,DCTN5,CHEK1,BUB3,TUBG1,SMC3,RIF1,LIG4,INCENP,RRS1,KNTC1,NIFK,DCTN6,SKA2,RAD1,SPC24,NCAPG2,AHCTF1,CSNK1A1,MIS12,MEAF6,BRD4,RPA1,CENPO,NOL6,HUS1,CENPW,NCAPH2,CDT1,SMC4,NSMCE1,TOPBP1,RANGAP1,PLK1,NUP107,CHAMP1,MIS18BP1,ERCC6L,HMGB2,AURKA,NSL1,SPDL1,AURKB,NSMCE2,SMARCA5,NSMCE4A,NC…
protein-DNA complex	GO:0032993	3.01991e-25	24.52	221	2754	94	21187	HIST1H2AE,HIST1H2AN,PRPF19,MAX,CENPA,GTF2B,GINS2,POLD2,TEN1,HIST2H3C1,HIST1H4H,POLA2,HIST1H3F,HNRNPK,PARP1,XRCC6,WDR18,ORC3,GTF2E1,PRIM1,TBP,HIST1H2BN,CDC5L,HIST1H4N,GTF2H3,TINF2,RPA1,HIST1H2BP,HIST1H3G,POLD1,H2AFZ,ERCC3,HIST1H4M,HIST1H2AB,EP300,HIST1H3D,TONSL,HIST2H2AA2,HIST2H3B,HIST1H4B,HIST1H3H,MPHOSPH8,POLR2H,HIST1H4A,DONSON,PRIM2,HIST1H4F,SP1,HIST1H2BK,RBPJ,RPA2,HIST1H2BF,HIST1H3E,HIST1H2BH,…
mitochondrial membrane	GO:0031966	1.19374e-24	23.9231	661	2754	189	21187	ATP5A1,MTG2,SLC25A37,SCO2,NDUFA8,TUFM,NDUFA3,SLC25A26,TYMS,RTN4IP1,MRPL17,TIMM17A,TMEM11,TIMM10,TIMM50,LETM1,SLC25A28,ATAD3A,PPOX,VDAC1,NDUFS2,MTG1,NDUFA2,TOMM22,COQ6,FDXR,NDUFAF6,OPA1,UQCRC1,MFN2,MTX2,MRPS21,DNAJC11,MINOS1,SDHA,MFN1,SLC25A51,COQ5,TAMM41,TMEM126B,ACAD9,ACSL4,NDUFC1,TMEM70,NDUFB9,DNAJC15,COX15,COX7B,COX10,NDUFS3,CDS2,DNM1L,ERAL1,PMPCB,NDUFS7,NDUFA1,ABCB7,SLC25A19,TIMMDC1,TIMM44,ST…
nuclear chromatin	GO:0000790	2.23287e-24	23.6511	425	2754	140	21187	HIST1H2AE,HIST1H2AN,KAT8,POU5F1,RBBP4,TELO2,MAX,MRE11A,HDAC1,SMARCC1,SMARCE1,CENPA,RUVBL2,TCP1,RAD51,SETD5,RCC1,SAP130,HIST2H3C1,HIST1H4H,HIST1H3F,NCOA3,ALDOA,SIN3A,HNRNPK,PRDM10,POLR2A,RIF1,SMARCA4,KAT5,SRCAP,STAT3,TBP,TRIM28,E2F4,HIST1H4N,FAM60A,DDX11,BRD4,MYC,RARG,TIMELESS,CHAF1B,HIST1H3G,SUDS3,TRRAP,H2AFZ,IPO4,HIST1H4M,TIPIN,HIST1H2AB,UHRF1,NUFIP1,ACTL6A,HIST1H3D,HIST2H2AA2,HIST2H3B,HIST1H4B,…
chromosome, telomeric region	GO:0000781	4.83226e-23	22.3159	112	2754	61	21187	WDR82,FEN1,THOC3,RTEL1,SMC6,SMC5,TELO2,MRE11A,RAD51D,RAD51,TEN1,ERCC4,CHEK1,UPF1,RIF1,THOC6,DNA2,THOC1,RNF8,TINF2,RPA1,TFIP11,DCLRE1B,DHX36,POLD1,ATM,RECQL4,PPP1CB,NSMCE2,ORC4,RPA2,THOC5,HAT1,NBN,POLR2B,RAD17,THOC2,GAR1,BLM,TERF1,KDM1A,ORC2,EZH2,WRAP53,ORC1,ZSCAN4C,CDK2,XRCC5,PINX1,CTC1,ZSCAN4F,PPP1R10,XRCC1,BRCA2,PPP1CC,ATRX,H2AFX,TERF2,PPP1CA,SLX4,ACD
inner mitochondrial membrane protein complex	GO:0098800	8.27372e-23	22.0823	133	2754	67	21187	ATP5A1,NDUFA8,NDUFA3,TIMM17A,TIMM50,NDUFS2,NDUFA2,UQCRC1,DNAJC11,MINOS1,SDHA,NDUFC1,NDUFB9,DNAJC15,NDUFS3,NDUFS7,NDUFA1,PAM16,NDUFA6,ATP5H,NDUFS8,NDUFS1,ATP5B,ATP5C1,NDUFB8,GRPEL1,NDUFAB1,NDUFA13,SDHB,ROMO1,ATP5J2,NDUFB7,NDUFB10,NDUFB6,TIMM23,ATP5K,ATP5O,UQCRB,FOXRED1,NDUFV2,UQCRFS1,UQCR10,NDUFA5,ATP5J,NDUFA10,NDUFB4,UQCRC2,ATP5L,ATP5D,NDUFB5,TIMM10B,UQCRQ,CYC1,NDUFB11,TIMM22,NDUFB2,NDUFB3,SDHD,A…
condensed chromosome, centromeric region	GO:0000779	7.24824e-22	21.1398	113	2754	60	21187	CENPM,HNRNPU,NUP43,CENPA,CENPN,ZW10,BIRC5,NUP85,KIF2C,DCTN5,BUB3,INCENP,KNTC1,DCTN6,SKA2,SPC24,AHCTF1,CSNK1A1,MIS12,MEAF6,CENPO,CENPW,CDT1,RANGAP1,PLK1,NUP107,CHAMP1,MIS18BP1,ERCC6L,AURKA,NSL1,SPDL1,AURKB,CENPH,CENPK,CENPU,ORC2,SKA3,SPAG5,DCTN3,MAD2L1,MAD1L1,ZWINT,ZFP207,CENPC1,SKA1,PINX1,NEK2,NDC80,NCAPD3,NUP37,NUP133,NUDCD2,PPP1CC,ATRX,CENPE,PHF6,SEH1L,CCNB1,CENPT
cytosolic large ribosomal subunit	GO:0022625	1.00552e-21	20.9976	65	2754	44	21187	RPLP0,RSL24D1,RPL10,RPL12,RPL36A,RPL5,RPLP2,RPL8,RPL14,RPL29,UBA52,RPL37A,RPLP1,RPL28,RPL30,RPL19,RPL6,RPL7A,RPL18,RPL11,RPL7L1,RPL24,RPL27A,RPL32,RPL39,RPL13,RPL10A,RPL38,RPL7,RPL36,RPL35,RPL26,RPL23A,RPL35A,RPL37,RPL18A,RPL3,RPL31,RPL4,RPL9,RPL23,RPL27,RPL15,RPL34
polysome	GO:0005844	1.58434e-21	20.8002	71	2754	46	21187	PNPT1,NR0B1,HSPA14,EEF2,PSMA6,BTF3,RPS4X,RPL8,RPL29,EIF3H,VBP1,RPL30,RPL19,RPL6,RPL7A,RPL18,RPL11,RPS26,NAA35,RPL24,RPS3,RPL32,RPS6,RPL39,RPL10A,RPS21,RPS25,RPL38,RPL7,RPL36,MCRS1,DRG1,RPL18A,RPS28,RPL31,GCN1L1,RPS23,FUS,ABCF1,RPS29,NAA38,DAZL,LARP4,UPF2,NAA30,RWDD1
cytosolic small ribosomal subunit	GO:0022627	4.00682e-21	20.3972	46	2754	36	21187	DDX3X,DHX29,FAU,RPS4X,RPS2,UBA52,RPS24,RPS16,RPS27,RPS10,RPS9,RPS11,RPS26,RPS3,RPS18,RPS5,RPSA,RPS8,RPS13,RPS6,RPS21,RPS25,RPS12,RPS17,RPS15A,RPS27A,RPS15,RPS19,RPS14,RPS28,RPS20,RPS23,RPS29,RPS7,LARP4,RPS3A1
condensed chromosome kinetochore	GO:0000777	1.17653e-20	19.9294	101	2754	55	21187	CENPM,HNRNPU,NUP43,CENPA,CENPN,ZW10,BIRC5,NUP85,KIF2C,DCTN5,BUB3,INCENP,KNTC1,DCTN6,SKA2,SPC24,AHCTF1,CSNK1A1,MIS12,MEAF6,CENPO,CENPW,CDT1,RANGAP1,PLK1,NUP107,CHAMP1,MIS18BP1,ERCC6L,NSL1,SPDL1,CENPH,CENPK,CENPU,ORC2,SKA3,SPAG5,DCTN3,MAD2L1,MAD1L1,ZWINT,ZFP207,CENPC1,SKA1,PINX1,NEK2,NDC80,NUP37,NUP133,NUDCD2,PPP1CC,PHF6,SEH1L,CCNB1,CENPT
microtubule cytoskeleton	GO:0015630	1.19469e-20	19.9227	1239	2754	284	21187	VRK1,PRPF19,NUBP2,FAM96B,TBCA,PPP2CA,CLTC,BCCIP,WDR73,EXOC7,SBDS,HNRNPU,G6PDX,NR0B1,SKP1A,HAUS4,UXT,NUBP1,LRPPRC,RACGAP1,CCT7,DCAF13,DDX3X,RUVBL2,PPP2R3C,IGBP1,ZW10,CIAO1,OPA1,PPP4C,MCM2,HDAC3,TUBB5,CCT2,MFN2,RAD51D,TCP1,RAD51,APEX1,BIRC5,NUP85,TBCD,KIF2C,TPT1,EIF3A,PCNA,TOP2A,MMS19,ERCC2,DCTN5,CHEK1,RAE1,TUBG1,DYNLRB1,PSMA1,RAN,SMC3,RIF1,DNM1L,PHAX,POLR3H,INCENP,DYNC1I2,CCT3,CUL3,KNTC1,CCT4,CDC1…
cellular anatomical entity	GO:0110165	1.24971e-20	19.9032	19442	2754	2649	21187	HSD17B10,HMBS,OXSR1,PKMYT1,PNPT1,VRK1,EEFSEC,HIST1H2AE,NDOR1,HIST1H2AN,RABGGTA,COA7,PRPF19,FDPS,REXO2,NSF,RAD9A,ATP5A1,VPS29,METTL14,CTU1,MTG2,NUBP2,PPP2R1A,GLRX5,ZPR1,CPSF3,ELP5,NDUFAF7,DOHH,SLC25A37,MRPL15,MRPL52,UBA1,WDR82,NUBPL,PRMT5,FAM96B,SEPSECS,TBCA,GOLT1B,HSCB,PPP2CA,CLTC,FEN1,SCO2,VHL,IPO13,GTF3C1,NDUFA8,BCCIP,CHMP6,THOC3,KAT8,DR1,PPIL2,NRBP1,DDX55,TXN1,WDR73,SKIV2L,MIOS,CMTR1,ATP6V1A,C…
acetyltransferase complex	GO:1902493	1.5709e-20	19.8039	95	2754	53	21187	KAT8,DR1,RUVBL2,NAA15,ACTB,TADA1,POLE3,YEATS4,KAT5,POLE4,MEAF6,KANSL3,ENY2,BRPF1,TRRAP,WDR5,NAA35,NAA20,EP300,ACTL6A,MORF4L2,EP400,DMAP1,TAF5,RUVBL1,OGT,MCRS1,ATXN7L3,TAF6,NAA50,DPF2,TAF2,KAT7,HCFC1,NAA10,NAA25,TAF7,KANSL2,MSL1,TAF6L,NAA38,ING3,MBIP,ING5,ING4,USP22,YEATS2,TADA3,TAF5L,SUPT3,NAA30,TADA2A,ZZZ3
protein acetyltransferase complex	GO:0031248	1.5709e-20	19.8039	95	2754	53	21187	KAT8,DR1,RUVBL2,NAA15,ACTB,TADA1,POLE3,YEATS4,KAT5,POLE4,MEAF6,KANSL3,ENY2,BRPF1,TRRAP,WDR5,NAA35,NAA20,EP300,ACTL6A,MORF4L2,EP400,DMAP1,TAF5,RUVBL1,OGT,MCRS1,ATXN7L3,TAF6,NAA50,DPF2,TAF2,KAT7,HCFC1,NAA10,NAA25,TAF7,KANSL2,MSL1,TAF6L,NAA38,ING3,MBIP,ING5,ING4,USP22,YEATS2,TADA3,TAF5L,SUPT3,NAA30,TADA2A,ZZZ3
Cajal body	GO:0015030	1.68017e-20	19.7746	52	2754	38	21187	ZPR1,SNRPC,EAF1,ELL,DDX42,ARIH1,DKC1,PHAX,LSM10,SMN1,HINFP,NOP58,LSG1,PRPF3,GEMIN4,DDX46,EFTUD2,XPO1,NHP2,TOE1,NOLC1,ICE2,PRPF4,GAR1,OIP5,NOP10,WRAP53,USPL1,CDK2,ZC3H8,FBL,SART3,ICE1,TGS1,PRPF31,RDM1,COIL,FRG1
replication fork	GO:0005657	4.4667e-20	19.35	72	2754	45	21187	PRPF19,XRCC3,MRE11A,RFC2,GINS2,MMS22L,POLD2,RAD51D,POLA2,PCNA,RFC5,CHEK1,RFC4,SMARCAD1,PRIM1,DNMT1,RFC3,CDC5L,TIMELESS,RPA1,POLD1,TIPIN,UHRF1,ZMIZ2,TONSL,DMAP1,RAD51C,DONSON,PRIM2,SMARCA5,RPA2,XRCC2,NBN,BLM,POLD3,E2F6,TOP1,RPA3,CDC45,MCM10,RAD51B,RFC1,H2AFX,GINS4,POLA1
organellar small ribosomal subunit	GO:0000314	1.49886e-19	18.8242	31	2754	28	21187	MRPS16,MRPS21,DAP3,MRPS2,MRPS27,MRPS18B,MRPS25,MRPS33,MRPS34,MRPS5,MRPS18A,MRPS15,MRPS28,MRPS6,MRPS9,MRPS10,MRPS7,MRPS36,MRPS11,MRPS12,MRPS26,MRPS22,MRPS23,MRPS24,MRPS18C,MRPL42,MRPS17,MRPS14
mitochondrial small ribosomal subunit	GO:0005763	1.49886e-19	18.8242	31	2754	28	21187	MRPS16,MRPS21,DAP3,MRPS2,MRPS27,MRPS18B,MRPS25,MRPS33,MRPS34,MRPS5,MRPS18A,MRPS15,MRPS28,MRPS6,MRPS9,MRPS10,MRPS7,MRPS36,MRPS11,MRPS12,MRPS26,MRPS22,MRPS23,MRPS24,MRPS18C,MRPL42,MRPS17,MRPS14
methyltransferase complex	GO:0034708	4.67423e-19	18.3303	107	2754	55	21187	METTL14,WDR82,PRMT5,KAT8,RIOK1,PRMT1,RBBP4,MAX,ERH,TRMT61A,RUVBL2,CXXC1,WDR77,SNRPE,SNRPD2,MGA,KMT2B,SNRPG,CLNS1A,CHD8,ZFP335,WDR5,TEX10,SNRPD1,JARID2,N6AMT1,SNRPD3,RUVBL1,MTF2,WTAP,MCRS1,TAF6,SNRPF,HCFC1,EZH2,TAF7,E2F6,FAM103A1,SNRPB,EED,RNMT,ZC3H13,SETD1A,RBBP5,PAXIP1,TRMT6,ASH2L,DPY30,RBM15,SUZ12,KMT2D,PRPF31,LAS1L,KDM5C,METTL3
spliceosomal tri-snRNP complex	GO:0097526	6.06834e-18	17.2169	33	2754	28	21187	LSM8,PPIH,LSM2,LSM7,TXNL4B,PRPF6,TXNL4A,DDX23,SNRPE,SNRPD2,SNRPG,LSM6,PRPF8,PRPF3,EFTUD2,SNRPD1,SNRNP200,PRPF18,SNRPD3,SNRPF,LSM5,PRPF4,ZMAT2,SNRPB,LSM3,USP39,LSM4,PRPF31
U4/U6 x U5 tri-snRNP complex	GO:0046540	6.06834e-18	17.2169	33	2754	28	21187	LSM8,PPIH,LSM2,LSM7,TXNL4B,PRPF6,TXNL4A,DDX23,SNRPE,SNRPD2,SNRPG,LSM6,PRPF8,PRPF3,EFTUD2,SNRPD1,SNRNP200,PRPF18,SNRPD3,SNRPF,LSM5,PRPF4,ZMAT2,SNRPB,LSM3,USP39,LSM4,PRPF31
U12-type spliceosomal complex	GO:0005689	2.92906e-17	16.5333	24	2754	23	21187	SNRNP35,RNPC3,SF3B4,LSM7,SNRNP25,PHF5A,SNRPD2,SF3B3,SNRPG,SNRPD1,DHX15,SF3B5,SNRPD3,YBX1,SNRPF,ZMAT5,SF3B2,SNRPB,SF3B1,ZCRB1,PDCD7,SF3B6,SNRNP48
polysomal ribosome	GO:0042788	3.99804e-17	16.3982	32	2754	27	21187	PNPT1,NR0B1,EEF2,BTF3,RPL8,RPL29,EIF3H,RPL30,RPL19,RPL6,RPL7A,RPL18,RPL11,RPS26,RPL24,RPL32,RPL39,RPL10A,RPS21,RPL38,RPL36,RPL18A,RPS28,RPL31,RPS23,ABCF1,RPS29
nuclear pore	GO:0005643	9.33116e-17	16.0301	76	2754	43	21187	NUP43,PCID2,NUP85,NXT1,RAE1,NUP88,RAN,AHCTF1,ENY2,NUTF2,NUP205,RANBP1,NUP50,KPNB1,RANGAP1,KPNA2,NUP93,NUP107,SEC13,NUP214,NUP160,NUPL1,GLE1,NUP153,TPR,MCM3AP,MAD2L1,MAD1L1,NXF1,NUP155,RANBP3,XPO4,NUP62,NUP37,EIF5A,SENP2,NUP133,KPNA1,SEH1L,KPNA6,NDC1,NUP54,NUP98
small-subunit processome	GO:0032040	1.31848e-16	15.8799	35	2754	28	21187	DCAF13,PDCD11,NOL10,EMG1,NOP14,WDR36,WDR3,KRR1,NOP58,IMP3,NOL6,IMP4,UTP18,NGDN,PWP2,UTP23,NOC4L,UTP14A,HEATR1,NOP56,FCF1,RRP9,RPS7,MPHOSPH10,FBL,WDR46,UTP6,TBL3
nuclear chromosome, telomeric region	GO:0000784	1.84876e-16	15.7331	77	2754	43	21187	WDR82,FEN1,THOC3,TELO2,MRE11A,RAD51D,RAD51,TEN1,ERCC4,UPF1,THOC6,DNA2,THOC1,TINF2,RPA1,TFIP11,DCLRE1B,POLD1,PPP1CB,ORC4,THOC5,NBN,POLR2B,THOC2,GAR1,TERF1,KDM1A,ORC2,ORC1,ZSCAN4C,XRCC5,PINX1,CTC1,ZSCAN4F,PPP1R10,XRCC1,BRCA2,PPP1CC,ATRX,TERF2,PPP1CA,SLX4,ACD
histone acetyltransferase complex	GO:0000123	2.59116e-16	15.5865	84	2754	45	21187	KAT8,DR1,RUVBL2,ACTB,TADA1,POLE3,YEATS4,KAT5,POLE4,MEAF6,KANSL3,ENY2,BRPF1,TRRAP,WDR5,EP300,ACTL6A,MORF4L2,EP400,DMAP1,TAF5,RUVBL1,OGT,MCRS1,ATXN7L3,TAF6,DPF2,TAF2,KAT7,HCFC1,TAF7,KANSL2,MSL1,TAF6L,ING3,MBIP,ING5,ING4,USP22,YEATS2,TADA3,TAF5L,SUPT3,TADA2A,ZZZ3
respiratory chain complex	GO:0098803	1.08443e-15	14.9648	83	2754	44	21187	NDUFA8,NDUFA3,NDUFS2,NDUFA2,UQCRC1,SDHA,NDUFC1,NDUFB9,COX7B,NDUFS3,NDUFS7,NDUFA1,NDUFA6,NDUFS8,NDUFS1,NDUFB8,COX6B1,NDUFAB1,NDUFA13,SDHB,NDUFB7,NDUFB10,NDUFB6,UQCRB,FOXRED1,NDUFV2,UQCRFS1,UQCR10,NDUFA5,NDUFA10,NDUFB4,UQCRC2,NDUFB5,UQCRQ,CYC1,NDUFB11,NDUFB2,NDUFB3,SDHD,SDHC,COX7C,UQCC3,NDUFC2,COX4I1
mitochondrial respirasome	GO:0005746	2.44106e-15	14.6124	81	2754	43	21187	NDUFA8,NDUFA3,NDUFS2,NDUFA2,UQCRC1,SDHA,NDUFC1,NDUFB9,COX7B,NDUFS3,NDUFS7,NDUFA1,NDUFA6,NDUFS8,NDUFS1,NDUFB8,NDUFAB1,NDUFA13,SDHB,NDUFB7,NDUFB10,NDUFB6,UQCRB,FOXRED1,NDUFV2,UQCRFS1,UQCR10,NDUFA5,NDUFA10,NDUFB4,UQCRC2,NDUFB5,UQCRQ,CYC1,NDUFB11,NDUFB2,NDUFB3,SDHD,SDHC,COX7C,UQCC3,NDUFC2,COX4I1
transcription elongation factor complex	GO:0008023	9.22728e-15	14.0349	49	2754	32	21187	MMS22L,EAF1,SETD5,ELL,SUPT16,ELP2,NELFCD,CDC73,CTR9,PAF1,BRD4,SUPT5,RTF1,NUFIP1,NELFA,TONSL,CDK9,ELOF1,ELP4,MLLT1,ICE2,WDR61,NELFE,SUPT4A,ZC3H8,PEX2,ICE1,SUPT6,CCNL1,CCNT2,SSRP1,CCNT1
centrosome	GO:0005813	1.01282e-14	13.9945	592	2754	152	21187	NUBP2,BCCIP,EXOC7,HNRNPU,G6PDX,NR0B1,SKP1A,HAUS4,UXT,DCAF13,DDX3X,RUVBL2,PPP2R3C,RAD51D,TCP1,APEX1,TBCD,KIF2C,PCNA,DCTN5,CHEK1,TUBG1,DYNLRB1,PSMA1,PHAX,POLR3H,DYNC1I2,CUL3,CCT4,CDC16,DCTN6,NUDT21,KEAP1,KIF20B,TUBGCP5,HAUS7,CTDP1,CSNK1A1,DDX11,MAPRE1,CCT5,KIF23,MASTL,RBBP6,DCLRE1B,MFAP1B,HAUS3,CDK1,NUMA1,RANBP1,PRKAR1A,OLA1,PLK1,TUBGCP4,ATP6V0D1,HAUS5,DCTN2,AURKA,CKAP5,ARL2,TUBGCP2,CDC27,AURKB,DYN…
supramolecular complex	GO:0099080	1.69016e-14	13.7721	1277	2754	270	21187	TBCA,CLTC,SCO2,KAT8,CENPM,EIF6,HNRNPU,NUP43,STK11,PYROXD1,RPLP0,HAUS4,LRPPRC,CENPA,CCT7,GLRX3,DDX3X,ACTR3,CENPN,IGBP1,ZW10,ARF1,TUBB5,CCT2,TCP1,ACTB,BIRC5,KRTAP6-5,PABPC1,NUP85,TARDBP,KIF2C,TPT1,EIF3A,ALDOA,ARPC2,LSM2,SIN3A,HNRNPK,DCTN5,BUB3,UPF1,TUBG1,DDX28,DYNLRB1,DNAJA3,PSMA6,DNM1L,LIG4,CNOT3,VPS11,INCENP,WDR1,RPS4X,DYNC1I2,RBPMS,CCT3,CUL3,KNTC1,CCT4,CDC16,KIF18A,DCTN6,KEAP1,TRIM71,SMN1,KIF20B…
peptidase complex	GO:1905368	1.80104e-14	13.7445	102	2754	48	21187	PSMD14,PSMB6,TADA1,PSMA1,PSMD2,PIGU,PSMA6,ELP2,PSMA5,PIGK,PSMC5,PSMC1,PSMD4,PSMD3,PSMB1,PSMC6,PSMD6,PSMC4,ENY2,PSMA3,PSMB4,VCP,PSMB7,SPCS2,PSMD1,GPAA1,PSMD8,PSMB3,PSMC2,ATXN7L3,TAF6,UCHL5,PSMC3,PSMD13,PSMA4,PSMB2,PSMD7,PIGT,PIGS,PSMD12,PSMA7,TAF6L,ADRM1,PSMB5,UBE3A,USP22,TADA3,PSMD11
ribonucleoprotein granule	GO:0035770	7.00276e-14	13.1547	225	2754	77	21187	HNRNPU,RPLP0,DDX3X,TUBB5,ACTB,PABPC1,TARDBP,LSM2,HNRNPK,UPF1,DDX28,PSMA6,LIG4,CNOT3,RPS4X,RBPMS,TRIM71,SMN1,GABPB1,HNRNPL,RPL28,SNRPG,DHX36,EIF2S1,LSM6,RPL6,SARNP,TUBA1A,VCP,RPTOR,KPNB1,KPNA2,CNOT8,CDK9,RPS6,DHX30,POLR2D,YBX1,PSMC2,POLR2G,ATXN2L,NCL,PSMC3,SNRPB2,DDX1,PSMA4,POLDIP3,ZFP36L1,BARD1,IQGAP1,EIF4E,NSUN2,DCPS,NXF1,FASTKD5,GIGYF2,TOP1,KHSRP,ELAVL1,CNOT2,LSM3,LARP4,CNOT1,RAC1,SUMO1,PQBP1,E…
respirasome	GO:0070469	7.48468e-14	13.1258	94	2754	45	21187	NDUFA8,NDUFA3,NDUFS2,NDUFA2,UQCRC1,SDHA,NDUFC1,NDUFB9,COX7B,NDUFS3,NDUFS7,NDUFA1,NDUFA6,NDUFS8,NDUFS1,NDUFB8,COX6B1,NDUFAB1,NDUFA13,SDHB,NDUFB7,NDUFB10,NDUFB6,CYCS,UQCRB,FOXRED1,NDUFV2,UQCRFS1,UQCR10,NDUFA5,NDUFA10,NDUFB4,UQCRC2,NDUFB5,UQCRQ,CYC1,NDUFB11,NDUFB2,NDUFB3,SDHD,SDHC,COX7C,UQCC3,NDUFC2,COX4I1
oxidoreductase complex	GO:1990204	8.77073e-14	13.057	109	2754	49	21187	NDUFA8,NDUFA3,NDUFS2,NDUFA2,DLST,UQCRC1,SDHA,NDUFC1,NDUFB9,NDUFS3,RRM1,NDUFS7,NDUFA1,NDUFA6,OGDH,NDUFS8,NDUFS1,NDUFB8,NDUFAB1,NDUFA13,SDHB,NDUFB7,NDUFB10,NDUFB6,RRM2,UQCRB,FOXRED1,NDUFV2,UQCRFS1,UQCR10,NDUFA5,NDUFA10,NDUFB4,UQCRC2,NDUFB5,MRPS36,UQCRQ,CYC1,NDUFB11,ETFDH,DLD,NDUFB2,NDUFB3,SDHD,GCSH,SDHC,ETFA,UQCC3,NDUFC2
90S preribosome	GO:0030686	4.50809e-13	12.346	27	2754	22	21187	BOP1,WDR12,NOP14,WDR36,WDR3,RRP7A,IMP3,NOL6,IMP4,UTP18,BMS1,PWP2,NOC4L,SRFBP1,RSL1D1,HEATR1,MPHOSPH10,UTP6,MRPL1,TBL3,PES1,FAM207A
nucleoid	GO:0009295	4.94024e-13	12.3063	45	2754	29	21187	TFB1M,TUFM,POLRMT,ATAD3A,TEFM,LRPPRC,VDAC1,HSPA9,SSBP1,DDX28,DNAJA3,DNA2,ATP5B,POLG,UQCC2,SUPV3L1,TFB2M,POLDIP2,POLG2,DHX30,LONP1,ELAC2,TRMT10C,FASTKD5,HADHA,TFAM,SOD2,HADHB,SLC25A5
mitochondrial nucleoid	GO:0042645	4.94024e-13	12.3063	45	2754	29	21187	TFB1M,TUFM,POLRMT,ATAD3A,TEFM,LRPPRC,VDAC1,HSPA9,SSBP1,DDX28,DNAJA3,DNA2,ATP5B,POLG,UQCC2,SUPV3L1,TFB2M,POLDIP2,POLG2,DHX30,LONP1,ELAC2,TRMT10C,FASTKD5,HADHA,TFAM,SOD2,HADHB,SLC25A5
mitotic spindle	GO:0072686	1.91417e-12	11.718	124	2754	51	21187	CLTC,BCCIP,HNRNPU,RACGAP1,HDAC3,RAE1,SMC3,CUL3,KIF18A,KIF20B,ECT2,MAPRE1,KIF11,KIF23,HAUS3,CDK1,NUMA1,RPS3,TPX2,RANGAP1,KIF18B,AURKA,AURKB,KATNA1,FLCN,CDC7,SMC1A,TPR,SKA3,SPAG5,MAD2L1,MAD1L1,ESPL1,DCTN1,TBCK,TBL1X,DYNLL1,MAPK1,TBL1XR1,IK,NUP62,NUDCD2,STAG2,CENPE,KIF22,YEATS2,TADA3,TAF1D,CDC42,TADA2A,NGRN
cytoplasmic ribonucleoprotein granule	GO:0036464	2.38578e-12	11.6224	215	2754	72	21187	HNRNPU,RPLP0,DDX3X,TUBB5,ACTB,PABPC1,TARDBP,LSM2,HNRNPK,UPF1,PSMA6,LIG4,CNOT3,RPS4X,RBPMS,TRIM71,SMN1,GABPB1,RPL28,SNRPG,DHX36,EIF2S1,LSM6,RPL6,SARNP,TUBA1A,VCP,RPTOR,KPNB1,KPNA2,CNOT8,CDK9,RPS6,POLR2D,YBX1,PSMC2,POLR2G,ATXN2L,NCL,PSMC3,SNRPB2,DDX1,PSMA4,POLDIP3,ZFP36L1,BARD1,IQGAP1,EIF4E,NSUN2,DCPS,NXF1,GIGYF2,TOP1,KHSRP,ELAVL1,CNOT2,LSM3,LARP4,CNOT1,RAC1,PQBP1,EIF4ENIF1,DCP2,CIRBP,LSM14A,CAPRIN…
microtubule organizing center	GO:0005815	2.92659e-12	11.5336	771	2754	177	21187	NUBP2,BCCIP,EXOC7,HNRNPU,G6PDX,NR0B1,SKP1A,HAUS4,UXT,NUBP1,DCAF13,DDX3X,RUVBL2,PPP2R3C,PPP4C,RAD51D,TCP1,RAD51,APEX1,BIRC5,TBCD,KIF2C,EIF3A,PCNA,TOP2A,DCTN5,CHEK1,TUBG1,DYNLRB1,PSMA1,RAN,PHAX,POLR3H,DYNC1I2,CUL3,CCT4,CDC16,KIF18A,DCTN6,NUDT21,KEAP1,KIF20B,TUBGCP5,HAUS7,CTDP1,CSNK1A1,DDX11,MAPRE1,CCT5,BIRC6,KIF23,MASTL,RBBP6,DCLRE1B,CFAP20,PTPN23,MFAP1B,HAUS3,CDK1,NUMA1,RANBP1,TOPBP1,PRKAR1A,OLA1,…
U2-type catalytic step 2 spliceosome	GO:0071007	3.82449e-12	11.4174	31	2754	23	21187	PRPF19,SNRNP40,CWC22,RBM22,SNRPA1,PPIE,SNRPE,SNRPD2,CDC5L,SNRPG,CRNKL1,PRPF8,EFTUD2,DHX8,SNRPD1,SNRPD3,SNRPF,SNRPB2,AQR,PPIL1,SNRPB,CWC15,XAB2
fibrillar center	GO:0001650	8.83544e-12	11.0538	128	2754	51	21187	ORC6,UBE2N,UTP15,DKC1,UBTF,CCDC137,RRS1,URB1,CD2BP2,RPP38,NOP58,TAF1C,DDX11,EIF3L,IMP4,WDR43,EXOSC8,DDX46,NUFIP1,SMARCB1,WDR33,USO1,NOLC1,SMARCA5,NCL,HEATR1,MLLT1,SNRPB2,TXNRD1,CD3EAP,GAR1,NRIP1,NOP56,TIMM13,CHCHD1,TERF1,MRPL23,RNMT,POLR2F,TOP1,IP6K1,FBL,APEX2,PRMT7,SELENBP1,SUMO1,UBE2I,POLR1E,RPAIN,SMAD7,COIL
spindle pole	GO:0000922	8.98007e-12	11.0467	166	2754	60	21187	NUBP2,PPP2CA,BCCIP,WDR73,SBDS,HNRNPU,UXT,ZW10,TPT1,RAE1,TUBG1,SMC3,CUL3,KNTC1,KIF20B,TUBGCP5,CTDP1,DDX11,KIF11,BIRC6,NUMA1,TPX2,TOPBP1,PLK1,TUBGCP4,AURKA,CKAP5,TUBGCP2,SPDL1,AURKB,CEP85,KATNA1,DLGAP5,SMC1A,CDC20,NPM1,SPAG5,WDR62,MAD2L1,KATNB1,MAD1L1,PRC1,TUBGCP3,DCTN4,DCTN1,TMEM201,NEK2,IK,NUP62,NUDCD2,LATS1,HAUS8,STAG2,HAUS1,RMDN3,TUBGCP6,MAPK14,TOPORS,POC1A,CCNB1
nuclear replication fork	GO:0043596	2.60279e-11	10.5846	41	2754	26	21187	PRPF19,GINS2,MMS22L,POLD2,POLA2,PCNA,SMARCAD1,PRIM1,CDC5L,TIMELESS,RPA1,POLD1,TIPIN,ZMIZ2,TONSL,PRIM2,SMARCA5,RPA2,POLD3,E2F6,TOP1,RPA3,CDC45,MCM10,GINS4,POLA1
proteasome complex	GO:0000502	3.06746e-11	10.5132	70	2754	35	21187	PSMD14,PSMB6,PSMA1,PSMD2,PSMA6,ELP2,PSMA5,PSMC5,PSMC1,PSMD4,PSMD3,PSMB1,PSMC6,PSMD6,PSMC4,PSMA3,PSMB4,VCP,PSMB7,PSMD1,PSMD8,PSMB3,PSMC2,UCHL5,PSMC3,PSMD13,PSMA4,PSMB2,PSMD7,PSMD12,PSMA7,ADRM1,PSMB5,UBE3A,PSMD11
transcription regulator complex	GO:0005667	3.81663e-11	10.4183	438	2754	114	21187	GTF3C1,DR1,HNRNPU,POU5F1,RBBP4,MAX,MED26,HDAC1,ASCC3,GTF2B,NAA15,HDAC3,APEX1,MED7,GTF2A1,SNF8,SNAPC1,CDK7,SIN3A,ERCC2,PARP1,XRCC6,GTF2E2,PRDM10,BRF2,GTF2F1,KAT5,PSMC5,GTF2E1,TAF13,GTF3C4,TFCP2L1,STAT3,MNAT1,TBP,NRF1,TRIM28,TAF8,E2F4,GTF2H2,TAF1C,GTF2H3,MGA,GEMIN5,ABT1,GTF3C3,RARG,GTF2H1,MED18,TRRAP,GTF3C6,ERCC3,MED14,EP300,SNAPC4,DDX20,MED23,GTF2A2,MED4,TAF5,NR5A2,TAF6,SP1,RBPJ,RBBP8,TAF2,CDK4,GT…
U2 snRNP	GO:0005686	3.94913e-11	10.4035	19	2754	17	21187	SF3A2,SNRPA1,SF3A3,SNRPE,PHF5A,SNRPD2,SNRPG,SNRPD1,SF3B5,SNRPD3,SNRPB2,RBMX2,SF3A1,HTATSF1,SF3B2,SNRPB,SF3B1
mediator complex	GO:0016592	4.61145e-11	10.3362	36	2754	24	21187	MED26,MED20,MED12,MED7,MED10,MED21,MED30,MED18,MED14,MED24,MED4,MED22,MED16,MED28,MED17,MED8,MED25,MED31,THRAP3,MED29,MED27,MED11,MED15,MED19
endopeptidase complex	GO:1905369	5.29578e-11	10.2761	71	2754	35	21187	PSMD14,PSMB6,PSMA1,PSMD2,PSMA6,ELP2,PSMA5,PSMC5,PSMC1,PSMD4,PSMD3,PSMB1,PSMC6,PSMD6,PSMC4,PSMA3,PSMB4,VCP,PSMB7,PSMD1,PSMD8,PSMB3,PSMC2,UCHL5,PSMC3,PSMD13,PSMA4,PSMB2,PSMD7,PSMD12,PSMA7,ADRM1,PSMB5,UBE3A,PSMD11
DNA packaging complex	GO:0044815	5.65334e-11	10.2477	129	2754	50	21187	HIST1H2AE,HIST1H2AN,SMC2,CENPA,HIST2H3C1,HIST1H4H,HIST1H3F,NCAPG2,HIST1H2BN,HIST1H4N,HIST1H2BP,HIST1H3G,NCAPH2,H2AFZ,SMC4,HIST1H4M,HIST1H2AB,HIST1H3D,HIST2H2AA2,HIST2H3B,HIST1H4B,HIST1H3H,MPHOSPH8,HIST1H4A,HIST1H4F,HIST1H2BK,HIST1H2BF,HIST1H3E,HIST1H2BH,NCAPD2,HIST1H4J,HIST1H2AI,HIST1H4K,HIST1H3A,HIST1H3I,HIST1H2BM,HIST2H2AA1,HIST1H4D,HIST2H2AC,HIST1H2AH,HIST1H2BL,NCAPD3,HIST3H2BA,HIST1H2BJ,HIST1…
H4 histone acetyltransferase complex	GO:1902562	6.08708e-11	10.2156	45	2754	27	21187	KAT8,DR1,RUVBL2,ACTB,POLE3,YEATS4,KAT5,POLE4,MEAF6,KANSL3,TRRAP,WDR5,ACTL6A,MORF4L2,EP400,DMAP1,RUVBL1,MCRS1,HCFC1,KANSL2,MSL1,ING3,MBIP,YEATS2,TADA3,TADA2A,ZZZ3
RNA polymerase II transcription regulator complex	GO:0090575	9.63333e-11	10.0162	165	2754	58	21187	HNRNPU,MAX,MED26,ASCC3,GTF2B,GTF2A1,CDK7,ERCC2,GTF2E2,GTF2F1,PSMC5,GTF2E1,TAF13,STAT3,MNAT1,TBP,TRIM28,TAF8,E2F4,GTF2H2,GTF2H3,GEMIN5,RARG,GTF2H1,MED18,TRRAP,ERCC3,MED14,GTF2A2,MED4,TAF5,NR5A2,TAF6,TAF2,TFDP1,SMAD2,MED17,TAF7,CCNH,E2F6,GTF2H4,NFYA,TAF6L,MED8,TCEA1,NFYC,CARM1,GTF2H5,MED31,GTF2F2,TAF11,POU2F1,TADA3,NFYB,ASCC2,TAF5L,SUPT3,ING2
NADH dehydrogenase complex	GO:0030964	1.19659e-10	9.92206	49	2754	28	21187	NDUFA8,NDUFA3,NDUFS2,NDUFA2,NDUFC1,NDUFB9,NDUFS3,NDUFS7,NDUFA1,NDUFA6,NDUFS8,NDUFS1,NDUFB8,NDUFAB1,NDUFA13,NDUFB7,NDUFB10,NDUFB6,FOXRED1,NDUFV2,NDUFA5,NDUFA10,NDUFB4,NDUFB5,NDUFB11,NDUFB2,NDUFB3,NDUFC2
mitochondrial respiratory chain complex I	GO:0005747	1.19659e-10	9.92206	49	2754	28	21187	NDUFA8,NDUFA3,NDUFS2,NDUFA2,NDUFC1,NDUFB9,NDUFS3,NDUFS7,NDUFA1,NDUFA6,NDUFS8,NDUFS1,NDUFB8,NDUFAB1,NDUFA13,NDUFB7,NDUFB10,NDUFB6,FOXRED1,NDUFV2,NDUFA5,NDUFA10,NDUFB4,NDUFB5,NDUFB11,NDUFB2,NDUFB3,NDUFC2
respiratory chain complex I	GO:0045271	1.19659e-10	9.92206	49	2754	28	21187	NDUFA8,NDUFA3,NDUFS2,NDUFA2,NDUFC1,NDUFB9,NDUFS3,NDUFS7,NDUFA1,NDUFA6,NDUFS8,NDUFS1,NDUFB8,NDUFAB1,NDUFA13,NDUFB7,NDUFB10,NDUFB6,FOXRED1,NDUFV2,NDUFA5,NDUFA10,NDUFB4,NDUFB5,NDUFB11,NDUFB2,NDUFB3,NDUFC2
small nucleolar ribonucleoprotein complex	GO:0005732	1.68109e-10	9.77441	22	2754	18	21187	POP4,DKC1,NOP58,RPP30,LSM6,NHP2,POP5,POP7,NOLC1,SNRPF,POP1,GAR1,NOP56,RRP9,NOP10,MPHOSPH10,FBL,NAF1
SMN-Sm protein complex	GO:0034719	2.51792e-10	9.59896	16	2754	15	21187	GEMIN6,SNRPE,SMN1,SNRPD2,GEMIN5,SNRPG,GEMIN4,SNRPD1,DDX20,SNRPD3,SNRPF,GEMIN7,GEMIN8,SNRPB,GEMIN2
RNA polymerase III complex	GO:0005666	2.73456e-10	9.56311	18	2754	16	21187	CRCP,POLR3B,POLR3F,POLR3H,POLR3K,POLR1D,POLR3A,POLR1C,POLR3C,POLR2L,POLR2H,POLR2K,POLR2F,POLR3D,POLR2E,POLR3E
transcription factor TFIID complex	GO:0005669	5.79875e-10	9.23667	36	2754	23	21187	GTF2B,GTF2A1,ERCC2,GTF2E2,GTF2F1,GTF2E1,TAF13,TBP,TAF8,GTF2H2,GTF2H3,ERCC3,GTF2A2,TAF5,TAF6,TAF2,TAF7,GTF2H4,TAF6L,TCEA1,GTF2H5,TAF11,SUPT3
exoribonuclease complex	GO:1905354	6.78749e-10	9.16829	23	2754	18	21187	PNPT1,EXOSC10,DIS3,EXOSC3,ZFC3H1,EXOSC2,MPHOSPH6,SUPV3L1,EXOSC5,EXOSC8,SKIV2L2,EXOSC7,EXOSC1,WDR74,EXOSC4,DIS3L,NVL,LAS1L
RNA polymerase I complex	GO:0005736	1.06905e-09	8.971	13	2754	13	21187	POLR1D,POLR1C,POLR1B,POLR2L,POLR2H,CD3EAP,POLR1A,POLR2K,POLR2F,POLR2E,TWISTNB,ZNRD1,POLR1E
carboxy-terminal domain protein kinase complex	GO:0032806	1.52127e-09	8.81779	19	2754	16	21187	CDK7,ERCC2,PSMC5,MNAT1,GTF2H2,GTF2H3,BRD4,GTF2H1,ERCC3,CDK9,CCNH,GTF2H4,GTF2H5,GTF2F2,CCNT2,CCNT1
U5 snRNP	GO:0005682	1.82513e-09	8.73871	15	2754	14	21187	TXNL4B,PRPF6,TXNL4A,DDX23,CD2BP2,SNRPE,SNRPD2,SNRPG,PRPF8,SNRPD1,SNRNP200,PRPF18,SNRPD3,SNRPB
eukaryotic translation initiation factor 3 complex	GO:0005852	1.82513e-09	8.73871	15	2754	14	21187	EIF3F,DDX3X,EIF3K,EIF3D,EIF3A,EIF3C,EIF3I,EIF3H,EIF3L,EIF3E,EIF3B,EIF3G,EIF3M,EIF3J1
eukaryotic 48S preinitiation complex	GO:0033290	1.82513e-09	8.73871	15	2754	14	21187	EIF3F,EIF3K,EIF3D,EIF3A,EIF3C,EIF3I,EIF3H,EIF3L,EIF2S1,EIF3E,EIF3B,EIF3G,EIF3M,EIF3J1
nuclear periphery	GO:0034399	3.61717e-09	8.44163	133	2754	48	21187	KAT8,EIF6,HNRNPU,DCAF7,TELO2,PCNA,SMC3,PSMA6,CXXC1,THOC1,PHF5A,CSNK2B,AHCTF1,PHB2,CENPW,PRPF40A,NUP205,NUMA1,UHRF1,NUFIP1,NUP93,NUP107,RUVBL1,CAD,HAT1,EBNA1BP2,PIAS4,BLM,KIN,NUP153,SMC1A,ANAPC4,TPR,NPM1,MORC3,PAXIP1,CHMP1A,PRKCD,MATR3,HES1,MORC2A,RAD21,YY1,STAG2,SRPK1,PPIG,POLA1,NUP98
exosome (RNase complex)	GO:0000178	4.11684e-09	8.38544	22	2754	17	21187	PNPT1,EXOSC10,DIS3,EXOSC3,ZFC3H1,EXOSC2,MPHOSPH6,SUPV3L1,EXOSC5,EXOSC8,SKIV2L2,EXOSC7,EXOSC1,WDR74,EXOSC4,DIS3L,NVL
proteasome regulatory particle	GO:0005838	7.47132e-09	8.1266	25	2754	18	21187	PSMD14,PSMD2,PSMC5,PSMC1,PSMD4,PSMD3,PSMC6,PSMD6,PSMC4,PSMD1,PSMD8,PSMC2,PSMC3,PSMD13,PSMD7,PSMD12,ADRM1,PSMD11
preribosome, large subunit precursor	GO:0030687	7.47132e-09	8.1266	25	2754	18	21187	EIF6,MAK16,MRTO4,BOP1,WDR12,MDN1,RRS1,PPAN,FTSJ3,NSA2,EBNA1BP2,WDR74,NIP7,RRP1,RRP15,RPF1,LAS1L,PES1
transcription factor TFIIH holo complex	GO:0005675	8.25573e-09	8.08324	12	2754	12	21187	CDK7,ERCC2,PSMC5,MNAT1,GTF2H2,GTF2H3,GTF2H1,ERCC3,CCNH,GTF2H4,GTF2H5,GTF2F2
myelin sheath	GO:0043209	8.37831e-09	8.07684	210	2754	64	21187	NSF,ATP5A1,CLTC,ATP6V1A,TUFM,ATP6V1B2,ATP1A1,VDAC1,HSPA9,DLST,UQCRC1,CCT2,TCP1,ACTB,NAPA,GPI1,SDHA,ALDOA,PGAM1,EEF1A1,NDUFS3,STIP1,WDR1,CCT3,ATP5H,NDUFS1,ATP5B,ATP5C1,PHB,UBA52,GNB1,CCT5,PKM,TUBA1A,VCP,CYCS,TUBA1B,ATP5O,NDUFV2,UQCRFS1,HSPD1,NDUFA10,UQCRC2,MDH2,SOD1,TUBB4B,RPS27A,GAPDH,HSPA8,DLD,ARF6,ITGB1,HSPA5,UBC,ACTG1,STX4A,SPTAN1,SOD2,ACTR1A,MIF,RALA,CDC42,PRDX1,SLC25A5
translation preinitiation complex	GO:0070993	9.91745e-09	8.0036	18	2754	15	21187	EIF3F,DHX29,EIF3K,EIF3D,EIF3A,EIF3C,EIF3I,EIF3H,EIF3L,EIF2S1,EIF3E,EIF3B,EIF3G,EIF3M,EIF3J1
spindle microtubule	GO:0005876	1.5981e-08	7.7964	57	2754	28	21187	CLTC,HNRNPU,ZW10,BIRC5,TUBG1,CUL3,KNTC1,CDC16,KIF18A,SKA2,MAPRE1,KIF11,CDK1,NUMA1,TPX2,PLK1,KIF18B,AURKA,CDC27,AURKB,POLB,SKA3,SPAG5,TUBGCP3,SKA1,HAUS2,CENPE,PAFAH1B1
DNA polymerase complex	GO:0042575	2.46535e-08	7.60812	21	2754	16	21187	CRCP,POLD2,POLA2,POLE3,DNA2,POLG,PRIM1,POLE,POLE4,POLD1,POLG2,PRIM2,POLE2,POLD3,REV3L,POLA1
nuclear envelope	GO:0005635	3.00138e-08	7.52268	471	2754	112	21187	FANCL,BANF1,PGRMC2,BRAP,RTCB,NUP43,DNAJC2,IPO7,LRPPRC,TUBB5,PCID2,RCC1,TNPO3,NUP85,PRPF38A,NXT1,PARP1,DCTN5,RAE1,NUP88,RAN,RIF1,YEATS4,RRM1,TXNL4A,WDR3,NUPL2,SCAI,AHCTF1,RRP12,GTPBP4,ENY2,NUTF2,GTF3C3,TRA2B,UTP18,NUP205,RRM2,RANBP1,NUP50,KPNB1,RANGAP1,INTS5,KPNA2,NUP93,NUP107,XPO1,SEC13,NUP214,NUP160,NOC4L,NDUFB4,WTAP,YBX1,DYNC1H1,ANKRD17,CSE1L,NUPL1,MRPL19,CDK4,PCYT1A,GLE1,GAPDH,SEPHS1,CEPT1,NUP…
eukaryotic 43S preinitiation complex	GO:0016282	6.39743e-08	7.19399	17	2754	14	21187	EIF3F,DHX29,EIF3K,EIF3D,EIF3A,EIF3C,EIF3I,EIF3H,EIF3L,EIF3E,EIF3B,EIF3G,EIF3M,EIF3J1
histone methyltransferase complex	GO:0035097	7.23041e-08	7.14084	79	2754	33	21187	WDR82,PRMT5,KAT8,RBBP4,MAX,RUVBL2,CXXC1,MGA,KMT2B,CHD8,ZFP335,WDR5,TEX10,JARID2,RUVBL1,MTF2,MCRS1,TAF6,HCFC1,EZH2,TAF7,E2F6,EED,SETD1A,RBBP5,PAXIP1,ASH2L,DPY30,SUZ12,KMT2D,PRPF31,LAS1L,KDM5C
nucleosome	GO:0000786	7.54674e-08	7.12224	121	2754	43	21187	HIST1H2AE,HIST1H2AN,CENPA,HIST2H3C1,HIST1H4H,HIST1H3F,HIST1H2BN,HIST1H4N,HIST1H2BP,HIST1H3G,H2AFZ,HIST1H4M,HIST1H2AB,HIST1H3D,HIST2H2AA2,HIST2H3B,HIST1H4B,HIST1H3H,MPHOSPH8,HIST1H4A,HIST1H4F,HIST1H2BK,HIST1H2BF,HIST1H3E,HIST1H2BH,HIST1H4J,HIST1H2AI,HIST1H4K,HIST1H3A,HIST1H3I,HIST1H2BM,HIST2H2AA1,HIST1H4D,HIST2H2AC,HIST1H2AH,HIST1H2BL,HIST3H2BA,HIST1H2BJ,HIST1H3C,HIST1H2AK,H2AFX,H2AFJ,HIST1H4C
midbody	GO:0030496	7.69976e-08	7.11352	181	2754	56	21187	EXOC7,HNRNPU,ERH,RACGAP1,BIRC5,RAN,INCENP,KEAP1,RNF8,KIF20B,EXOC1,ECT2,NAT10,CTDP1,DDX11,BIRC6,KIF23,PIK3C3,CDK1,URB2,CHMP3,PLK1,ARL8B,CHAMP1,USP8,ZFP330,AURKB,KATNA1,FLCN,TSG101,IQGAP1,DNM2,JTB,SPAG5,DCTN3,SLC2A1,KATNB1,EXOC5,PRC1,CENPC1,TBCK,NEK2,ARF6,KIF4,NUP62,HSPA5,ANLN,CDCA8,PPP1CC,CENPE,UVRAG,RAB8A,RALA,CDC42,KIF14,EXOC2
proton-transporting two-sector ATPase complex	GO:0016469	8.18898e-08	7.08677	53	2754	26	21187	ATP5A1,ATP6V1A,ATP6V1B2,ATP6V0C,ATP6V1G1,ATP5H,ATP5B,ATP5C1,ATP6V0B,ATP5J2,ATP5K,ATP6V1E1,ATP5O,ATP6V0D1,ATP5J,ATP5L,ATP5D,ATP6V1C1,TMEM199,CCDC115,ATP6V1F,ATP6V1D,USMG5,ATP5E,ATP6AP1,ATP6V1H
nuclear exosome (RNase complex)	GO:0000176	8.68942e-08	7.06101	15	2754	13	21187	EXOSC10,DIS3,EXOSC3,EXOSC2,MPHOSPH6,EXOSC5,EXOSC8,SKIV2L2,EXOSC7,EXOSC1,WDR74,EXOSC4,NVL
methylosome	GO:0034709	9.44958e-08	7.02459	13	2754	12	21187	PRMT5,PRMT1,ERH,WDR77,SNRPE,SNRPD2,SNRPG,CLNS1A,SNRPD1,SNRPD3,SNRPF,SNRPB
nuclear nucleosome	GO:0000788	1.147e-07	6.94044	40	2754	22	21187	CENPA,HIST2H3C1,HIST1H4H,HIST1H3F,HIST1H4N,HIST1H3G,HIST1H4M,HIST1H3D,HIST2H3B,HIST1H4B,HIST1H3H,MPHOSPH8,HIST1H4A,HIST1H4F,HIST1H3E,HIST1H4J,HIST1H4K,HIST1H3A,HIST1H3I,HIST1H4D,HIST1H3C,HIST1H4C
telomerase holoenzyme complex	GO:0005697	1.45567e-07	6.83694	20	2754	15	21187	HNRNPU,LSM11,DKC1,NAT10,GNL3L,NHP2,SNRPD3,HNRNPC,GAR1,NOP10,WRAP53,SNRPB,SMG7,SMG5,NVL
ATPase complex	GO:1904949	1.56572e-07	6.80529	85	2754	34	21187	RBBP4,HDAC1,SMARCC1,SMARCE1,RUVBL2,SMARCA4,RFC4,KAT5,SRCAP,TRRAP,VCP,ACTL6A,EP400,DMAP1,BPTF,PBRM1,RUVBL1,SMARCB1,ACTR5,MCRS1,SMARCA5,UCHL5,ACTR8,DPF2,INO80,ING3,CHD4,INO80B,RFC1,YY1,SUZ12,HELQ,ARID1A,ATAD5
site of double-strand break	GO:0035861	1.67078e-07	6.77708	58	2754	27	21187	PRPF19,SMC6,SMC5,MRE11A,ACTR3,RAD51,ACTR2,ARPC4,ARPC2,PARP1,RFWD3,RIF1,SMARCAD1,RNF8,TIMELESS,FH1,HUS1,VCP,ESCO2,RPA2,RBBP8,NBN,WRAP53,RPA3,ARPC3,H2AFX,RNF168
anaphase-promoting complex	GO:0005680	2.29268e-07	6.63966	23	2754	16	21187	RBX1,ANAPC1,ANAPC11,CDC16,ANAPC2,CDC23,AURKAIP1,UBE2C,CDC27,ANAPC10,CDC20,ANAPC4,ANAPC13,UBE2S,ANAPC5,CDC26
mRNA cleavage factor complex	GO:0005849	4.47852e-07	6.34887	21	2754	15	21187	CPSF3,CPSF1,CPSF2,CLP1,SSU72,FIP1L1,TUT1,NUDT21,CSNK1A1,CPSF4,WDR33,ZC3H3,CSTF2,PCF11,CSTF1
microtubule	GO:0005874	5.85235e-07	6.23267	414	2754	98	21187	TBCA,CLTC,HNRNPU,HAUS4,LRPPRC,CCT7,IGBP1,ZW10,TUBB5,CCT2,TCP1,BIRC5,KIF2C,TPT1,EIF3A,TUBG1,DYNLRB1,DNM1L,INCENP,DYNC1I2,CCT3,CUL3,KNTC1,CCT4,CDC16,KIF18A,KIF20B,SKA2,TUBGCP5,HAUS7,MAPRE1,KIF11,CCT5,KIF23,CFAP20,HAUS3,TUBA1A,CDK1,NUMA1,TUBA1C,TPX2,NUDC,PLK1,TUBGCP4,TUBA1B,KIF18B,HAUS5,DCTN2,DYNLT1F,AURKA,CKAP5,TUBGCP2,CDC27,AURKB,DYNC1H1,TUBB4B,DYNLT1B,KATNA1,CAMSAP3,POLB,CCT8,INO80,IQGAP1,DNM2,SK…
INO80-type complex	GO:0097346	6.04354e-07	6.21871	24	2754	16	21187	RUVBL2,KAT5,SRCAP,TRRAP,ACTL6A,EP400,DMAP1,RUVBL1,ACTR5,MCRS1,UCHL5,ACTR8,INO80,ING3,INO80B,YY1
MCM complex	GO:0042555	6.73999e-07	6.17134	12	2754	11	21187	MCM4,MMS22L,MCM2,MCM7,MCM9,TONSL,MCM6,MCM5,MCMBP,MCM8,MCM3
proteasome accessory complex	GO:0022624	7.01253e-07	6.15413	30	2754	18	21187	PSMD14,PSMD2,PSMC5,PSMC1,PSMD4,PSMD3,PSMC6,PSMD6,PSMC4,PSMD1,PSMD8,PSMC2,PSMC3,PSMD13,PSMD7,PSMD12,ADRM1,PSMD11
endonuclease complex	GO:1905348	1.11098e-06	5.95429	37	2754	20	21187	HSD17B10,CLP1,POP4,RPP38,RPP30,RPP21,RPP14,DROSHA,RAD51C,POP5,POP7,POP1,TSEN2,TSEN54,DICER1,TRMT10C,TSEN34,DGCR8,LAS1L,SLX4
mitochondrial intermembrane space	GO:0005758	1.29742e-06	5.88692	91	2754	34	21187	PNPT1,COA7,REXO2,NDUFA8,CHCHD5,TIMM10,TRIAP1,OPA1,STOML2,GFER,NDUFS1,DTYMK,UQCC2,COX17,CHCHD4,AIFM1,NDUFB7,TIMM9,PRELID1,CYCS,BLOC1S1,ARL2,COA6,SOD1,TIMM13,TIMM10B,TIMM8A1,AK2,COA4,FBXL4,AGK,CPOX,COX19,CHCHD2
endoribonuclease complex	GO:1902555	1.46838e-06	5.83316	31	2754	18	21187	HSD17B10,CLP1,POP4,RPP38,RPP30,RPP21,RPP14,DROSHA,POP5,POP7,POP1,TSEN2,TSEN54,DICER1,TRMT10C,TSEN34,DGCR8,LAS1L
vesicle tethering complex	GO:0099023	1.66347e-06	5.77899	67	2754	28	21187	EXOC7,TRAPPC5,ZW10,TRAPPC1,COG4,VPS11,EXOC1,TRAPPC4,VPS16,COG1,VPS33A,COG7,TRAPPC8,VPS18,COG8,EXOC8,TRAPPC11,VPS51,RAB10,VPS52,EXOC5,COG5,VPS41,VPS54,CDC42,COG3,EXOC2,TRAPPC3
PML body	GO:0016605	2.23624e-06	5.65048	97	2754	35	21187	SMC6,SMC5,MAX,MRE11A,RAD51,ATR,RFWD3,RPA1,SUMO2,TOPBP1,DAXX,CDK9,EIF3E,TDG,NSMCE2,RPA2,NBN,PIAS4,BLM,TOP3A,MORC3,SENP2,SUMO1,EIF4ENIF1,ATRX,UBE2I,MTOR,CASP8AP2,RERE,RPAIN,TOPORS,N4BP1,HIRA,CIART,RDM1
nuclear matrix	GO:0016363	2.37048e-06	5.62516	106	2754	37	21187	KAT8,HNRNPU,DCAF7,SMC3,PSMA6,CXXC1,THOC1,PHF5A,CSNK2B,AHCTF1,PHB2,CENPW,PRPF40A,NUMA1,UHRF1,NUFIP1,RUVBL1,CAD,HAT1,PIAS4,BLM,KIN,SMC1A,NPM1,MORC3,PAXIP1,CHMP1A,PRKCD,MATR3,HES1,MORC2A,RAD21,YY1,STAG2,SRPK1,PPIG,POLA1
organelle membrane	GO:0031090	2.67226e-06	5.57312	2995	2754	489	21187	PKMYT1,PNPT1,ATP5A1,VPS29,MTG2,SLC25A37,UBA1,GOLT1B,CLTC,SCO2,NDUFA8,CHMP6,MIOS,ATP6V1A,TUFM,NDUFA3,SLC25A26,TYMS,RTN4IP1,MRPL17,TIMM17A,TMEM11,TIMM10,ATP1A1,TIMM50,DPAGT1,SCAP,BRAP,RTCB,LAMTOR4,DNAJC2,LETM1,YKT6,SLC25A28,ATAD3A,CDIPT,TFRC,PPOX,LRPPRC,VDAC1,NDUFS2,ATP6V0C,MTG1,NDUFA2,TOMM22,VPS25,COQ6,ACTR3,TMEM258,FDXR,ALG1,NDUFAF6,ZW10,ARF1,OPA1,UQCRC1,MFN2,MTX2,MBTPS1,MRPS21,DNAJC11,RCC1,KDSR,…
RNA polymerase II, core complex	GO:0005665	3.86127e-06	5.41327	13	2754	11	21187	POLR2A,POLR2J,POLR2I,POLR2L,POLR2H,POLR2D,POLR2G,POLR2B,POLR2K,POLR2F,POLR2E
nuclear pore outer ring	GO:0031080	4.77327e-06	5.32118	11	2754	10	21187	NUP43,NUP85,AHCTF1,NUP107,SEC13,NUP160,NUP37,NUP133,SEH1L,NUP98
site of DNA damage	GO:0090734	4.86536e-06	5.31289	78	2754	30	21187	PRPF19,SMC6,SMC5,MRE11A,ACTR3,RAD51,ACTR2,ARPC4,ARPC2,PARP1,RFWD3,RIF1,SMARCAD1,RNF8,TIMELESS,RPA1,FH1,HUS1,VCP,ESCO2,RPA2,RBBP8,KAT7,NBN,WRAP53,XRCC5,RPA3,ARPC3,H2AFX,RNF168
ubiquitin ligase complex	GO:0000151	6.31372e-06	5.19971	281	2754	71	21187	VHL,BRAP,DCAF7,SKP1A,MED20,MED12,RNF40,DCAF13,RBX1,MED7,MED10,SPOP,LZTR1,ANAPC1,ANAPC11,UBE2N,ARIH1,DDB1,CUL3,CDC16,KEAP1,ANAPC2,RNF8,KCTD10,DET1,MED21,CUL4B,MED30,CDC23,AURKAIP1,MED18,UBE4B,MED24,UBE2C,RNF20,CAND1,GLMN,CDC27,DDA1,ANAPC10,BRCA1,BARD1,MED17,CDC20,ANAPC4,CUL2,CCNF,SYVN1,FBXL4,MED31,CKS2,BCOR,OTULIN,UBE2V1,DCAF15,ANAPC13,CBX2,FBXW11,MED27,SEL1L,MED11,PCGF6,CUL1,TOPORS,RNF168,UBE2S,A…
MLL1 complex	GO:0071339	6.63114e-06	5.17841	30	2754	17	21187	KAT8,MAX,RUVBL2,MGA,CHD8,WDR5,TEX10,RUVBL1,MCRS1,TAF6,HCFC1,TAF7,E2F6,RBBP5,ASH2L,PRPF31,LAS1L
MLL1/2 complex	GO:0044665	6.63114e-06	5.17841	30	2754	17	21187	KAT8,MAX,RUVBL2,MGA,CHD8,WDR5,TEX10,RUVBL1,MCRS1,TAF6,HCFC1,TAF7,E2F6,RBBP5,ASH2L,PRPF31,LAS1L
nuclear ubiquitin ligase complex	GO:0000152	8.24212e-06	5.08396	44	2754	21	21187	RBX1,ANAPC1,ANAPC11,CDC16,ANAPC2,CDC23,AURKAIP1,UBE2C,CDC27,ANAPC10,BRCA1,BARD1,CDC20,ANAPC4,BCOR,ANAPC13,CBX2,PCGF6,UBE2S,ANAPC5,CDC26
serine/threonine protein kinase complex	GO:1902554	9.63642e-06	5.01608	80	2754	30	21187	BCCIP,PCNA,CDK7,ERCC2,PSMC5,MNAT1,GTF2H2,GTF2H3,BRD4,GTF2H1,ERCC3,CDK1,CDK9,CCNA2,CDK4,CCNK,CCNH,CDK2,GTF2H4,CCNF,CCNE1,GTF2H5,CKS2,GTF2F2,CCNT2,UVRAG,CCND3,CCNG1,CCNB1,CCNT1
cyclin-dependent protein kinase holoenzyme complex	GO:0000307	1.11556e-05	4.95251	41	2754	20	21187	BCCIP,PCNA,CDK7,MNAT1,BRD4,CDK1,CDK9,CCNA2,CDK4,CCNK,CCNH,CDK2,CCNF,CCNE1,CKS2,CCNT2,CCND3,CCNG1,CCNB1,CCNT1
organelle envelope lumen	GO:0031970	1.31841e-05	4.87995	103	2754	35	21187	PNPT1,COA7,REXO2,NDUFA8,CHCHD5,TIMM10,TRIAP1,OPA1,TUBB5,STOML2,GFER,NDUFS1,DTYMK,UQCC2,COX17,CHCHD4,AIFM1,NDUFB7,TIMM9,PRELID1,CYCS,BLOC1S1,ARL2,COA6,SOD1,TIMM13,TIMM10B,TIMM8A1,AK2,COA4,FBXL4,AGK,CPOX,COX19,CHCHD2
proteasome core complex	GO:0005839	1.347e-05	4.87063	19	2754	13	21187	PSMB6,PSMA1,PSMA6,PSMA5,PSMB1,PSMA3,PSMB4,PSMB7,PSMB3,PSMA4,PSMB2,PSMA7,PSMB5
microtubule associated complex	GO:0005875	1.52946e-05	4.81546	146	2754	44	21187	HAUS4,BIRC5,KIF2C,DYNLRB1,INCENP,DYNC1I2,KIF18A,DCTN6,KIF20B,NUDCD3,HAUS7,KIF11,KIF23,HAUS3,KIF18B,FNTA,HAUS5,DCTN2,DYNLT1F,AURKA,AURKB,DYNC1H1,DYNLT1B,FNTB,TPR,DCTN3,KATNB1,DCTN4,DCTN1,DYNLT1A,DYNLL1,KIF4,HAUS2,CDCA8,HAUS8,ACTR10,ACTR1A,ACTR1B,HAUS1,KIF22,TCTE3,KIF15,PAFAH1B1,KIF14
replisome	GO:0030894	1.61192e-05	4.79266	25	2754	15	21187	PRPF19,POLD2,POLA2,PRIM1,CDC5L,RPA1,POLD1,TONSL,DONSON,PRIM2,RPA2,POLD3,E2F6,RPA3,POLA1
DNA repair complex	GO:1990391	1.92173e-05	4.71631	35	2754	18	21187	ERCC4,XRCC6,LIG4,POLD1,ERCC3,ATM,SWSAP1,KDM1A,XRCC4,MSH6,XRCC5,PRKDC,XRCC1,PMS2,MSH2,ZSWIM7,RNF168,SLX4
aminoacyl-tRNA synthetase multienzyme complex	GO:0017101	2.52696e-05	4.5974	12	2754	10	21187	DARS,IARS,LARS,QARS,RPL5,KARS,MARS,EPRS,RARS,EEF1E1
mRNA cleavage and polyadenylation specificity factor complex	GO:0005847	2.70604e-05	4.56767	17	2754	12	21187	CPSF3,CPSF1,CPSF2,SSU72,FIP1L1,TUT1,NUDT21,CSNK1A1,CPSF4,WDR33,ZC3H3,CSTF2
Ctf18 RFC-like complex	GO:0031390	2.92685e-05	4.5336	8	2754	8	21187	RFC2,RFC5,RFC4,RFC3,DDX11,CHTF18,CHTF8,DSCC1
eukaryotic translation initiation factor 3 complex, eIF3m	GO:0071541	2.92685e-05	4.5336	8	2754	8	21187	EIF3F,EIF3D,EIF3A,EIF3C,EIF3I,EIF3H,EIF3B,EIF3M
SAGA-type complex	GO:0070461	3.35037e-05	4.47491	26	2754	15	21187	TADA1,ENY2,TRRAP,TAF5,ATXN7L3,TAF6,TAF2,HCFC1,TAF7,TAF6L,USP22,TADA3,TAF5L,SUPT3,TADA2A
chaperone complex	GO:0101031	3.56094e-05	4.44844	23	2754	14	21187	CDC37,CCT7,CCT2,TCP1,STIP1,CCT3,CCT4,CCT5,PSMG1,PSMG2,CCT8,HSP90AB1,HSPA8,TSC1
SWI/SNF superfamily-type complex	GO:0070603	3.88759e-05	4.41032	80	2754	29	21187	RBBP4,HDAC1,SMARCC1,SMARCE1,RUVBL2,SMARCA4,KAT5,SRCAP,TRRAP,ACTL6A,EP400,DMAP1,BPTF,PBRM1,RUVBL1,SMARCB1,ACTR5,MCRS1,SMARCA5,UCHL5,ACTR8,DPF2,INO80,ING3,CHD4,INO80B,YY1,SUZ12,ARID1A
DNA helicase complex	GO:0033202	5.25102e-05	4.27976	15	2754	11	21187	RUVBL2,ACTL6A,RUVBL1,ACTR5,MCRS1,UCHL5,ACTR8,INO80,INO80B,YY1,HELQ
intrinsic component of mitochondrial membrane	GO:0098573	5.30773e-05	4.27509	81	2754	29	21187	SCO2,TIMM17A,TMEM11,PPOX,MFN2,DNAJC11,MINOS1,MFN1,TMEM70,SLC25A19,COQ2,COX18,SCO1,ABCB10,PISD,MCUR1,TOMM40,TOMM70A,MUL1,ETFDH,OXA1L,TOMM20,COX11,AGK,UQCC3,COX16,CHCHD3,PET100,MFF
spindle midzone	GO:0051233	5.77489e-05	4.23846	37	2754	18	21187	HNRNPU,RACGAP1,RIF1,INCENP,KIF18A,KIF20B,CTDP1,MAPRE1,NUMA1,PLK1,ARL8B,KIF18B,AURKA,AURKB,CDCA8,CENPE,CDC42,KIF14
proton-transporting two-sector ATPase complex, catalytic domain	GO:0033178	7.15159e-05	4.1456	18	2754	12	21187	ATP5A1,ATP6V1A,ATP6V1B2,ATP5B,ATP5C1,ATP6V1E1,ATP5D,ATP6V1C1,ATP6V1F,ATP5E,ATP6AP1,ATP6V1H
nuclear replisome	GO:0043601	7.51967e-05	4.1238	24	2754	14	21187	PRPF19,POLD2,POLA2,PRIM1,CDC5L,RPA1,POLD1,TONSL,PRIM2,RPA2,POLD3,E2F6,RPA3,POLA1
protein kinase complex	GO:1902911	8.27777e-05	4.08209	96	2754	32	21187	BCCIP,PCNA,CDK7,ERCC2,PSMC5,MNAT1,GTF2H2,GTF2H3,BRD4,GTF2H1,ERCC3,CDK1,PRKAR1A,CDK9,CCNA2,CDK4,CCNK,CCNH,CDK2,GTF2H4,CCNF,CCNE1,GTF2H5,CKS2,GTF2F2,CCNT2,UVRAG,CCND3,CCNG1,LAS1L,CCNB1,CCNT1
ribonuclease P complex	GO:0030677	9.66308e-05	4.01488	13	2754	10	21187	HSD17B10,POP4,RPP38,RPP30,RPP21,RPP14,POP5,POP7,POP1,TRMT10C
catalytic step 1 spliceosome	GO:0071012	9.66308e-05	4.01488	13	2754	10	21187	PRPF19,CWC22,RBM22,CCDC94,PRPF8,SNRNP200,EIF4A3,RBM8A,CWC25,ISY1
preribosome, small subunit precursor	GO:0030688	9.66308e-05	4.01488	13	2754	10	21187	RIOK1,NOP14,FTSJ3,NOC4L,RRP1,BYSL,TSR1,NOB1,LTV1,FAM207A
U2-type catalytic step 1 spliceosome	GO:0071006	9.66308e-05	4.01488	13	2754	10	21187	PRPF19,CWC22,RBM22,CCDC94,PRPF8,SNRNP200,EIF4A3,RBM8A,CWC25,ISY1
integral component of mitochondrial membrane	GO:0032592	0.000110349	3.95723	79	2754	28	21187	SCO2,TIMM17A,TMEM11,PPOX,DNAJC11,MINOS1,MFN1,TMEM70,SLC25A19,COQ2,COX18,SCO1,ABCB10,PISD,MCUR1,TOMM40,TOMM70A,MUL1,ETFDH,OXA1L,TOMM20,COX11,AGK,UQCC3,COX16,CHCHD3,PET100,MFF
integral component of mitochondrial inner membrane	GO:0031305	0.000121219	3.91643	46	2754	20	21187	SCO2,TIMM17A,TMEM11,PPOX,DNAJC11,MINOS1,SLC25A19,COQ2,COX18,SCO1,PISD,MCUR1,ETFDH,OXA1L,COX11,AGK,UQCC3,COX16,CHCHD3,PET100
U1 snRNP	GO:0005685	0.000148154	3.82929	16	2754	11	21187	SNRPC,SNRPE,SNRPD2,SNRPG,PRPF40A,SNRPD1,SNRPD3,SNRNP70,SNRPF,SNRPB2,SNRPB
intrinsic component of mitochondrial inner membrane	GO:0031304	0.000185274	3.73218	47	2754	20	21187	SCO2,TIMM17A,TMEM11,PPOX,DNAJC11,MINOS1,SLC25A19,COQ2,COX18,SCO1,PISD,MCUR1,ETFDH,OXA1L,COX11,AGK,UQCC3,COX16,CHCHD3,PET100
[truncated: 84 more rows]

## Sheet: SFigure1g_pathway
Source	Term_name	Negative_log10_of_adjusted_p_value	Rank
[truncated: 285 more rows]
