# Supplementary material for: A multi-omics integrative analysis based on CRISPR screens re-defines the pluripotency regulatory network in ESCs
Source: Research Square preprint supplement (doi:10.21203/rs.3.rs-951395/v1), 2023-03-13
Supplement: Supplementary file 2 [file Supplementary Data10.xlsx]

## Sheet: Function terms
Module	Category	Term	Description	Log2(P-value)	Log(q-value)	Symbols
Core	WikiPathways	WP1763	PluriNetWork: mechanisms associated with pluripotency	-21.1898	-16.9083	Klf5,Ccnd1,Ctbp2,Gadd45a,Phc1,Smarcad1,Fgf4,Inhbb,Jarid2,Klf2,Klf4,Smad7,Pias2,Mtf2,Mybl2,Ncl,Mycn,Nodal,Prkcg,Pml,Pou5f1,Sox2,Spp1,Tbx3,Tfap2c,Trp53,Utf1,Zfp42,Zfp57,Zic2,Fbxo15,Rif1,Rybp,Sall1,Nacc1,Nanog,Tfcp2l1,Etv5,Pim3,Zfp281,Socs3,Enah,Gfpt2,Gstt2,Hk2,Nrp2,Ubtf,Vegfc,Xrcc5,Pla2g10,B3gnt2,Mkrn1,Stoml1,Lrrc2,Kdm5b,Mynn
	GO Biological Processes	GO:0048598	embryonic morphogenesis	-8.15461	-4.47512	Macf1,Socs3,Cobl,Enah,Epha2,Fgf3,Fgf4,Fn1,Fzd5,Fzd7,Gli2,Klf4,Cited2,Ncoa3,Mycn,Nodal,Pou5f1,Six4,Sod1,Sox2,Tmie,Tbx3,Tdgf1,Tgif1,Trp53,Vegfc,Zic2,Ror2,Myadm,Sall1,Zic5,Nanog,Pofut2,Arid1a,Zfp281,Ift52,Mthfd1l,Trim71,Hbegf,Smad7,Nrp2,Pml,Src,Tfap2c,Pla2g10,Kdm5b,Etv5,En2,Hs6st1,Arid2
	GO Biological Processes	GO:0019827	stem cell population maintenance	-7.85468	-4.27209	Aspm,Fgf4,Fzd7,Klf4,Mtf2,Ncoa3,Nodal,Pou5f1,Sox2,Tbx3,Tfap2c,Rif1,Sall1,Nanog,Arid1a,Jmjd1c,Igf2bp1,Ss18,Smarcad1,Fzd5,Inhbb,Jarid2,Nras,Lefty2,Macf1,Epha2,Fn1,Tdgf1,Tgif1,Trp53,Myadm,Pofut2,Cited2,Zic2,Zfp57,Rtf2,Fgf3,Gli2
	GO Biological Processes	GO:0060444	branching involved in mammary gland duct morphogenesis	-7.10984	-3.77509	Epha2,Ncoa3,Pml,Src,Tbx3,Tfap2c,Kdm5b,Etv5,Gli2,Elf3,Ccnd1,Socs3,Fzd5,Cited2,Mycn,Six4,Sox2,Tdgf1,Sall1,Cobl,Fgf3,Hrh2,Jarid2,Nodal,Rps6ka1,Stk11,Sulf2,Tfcp2l1,Rap1gap,Aspm,Gjb3,Sod1,Ubb,Ror2,Hs6st1,Ube2q1,Nanog,Arid1a,Jmjd1c
	WikiPathways	WP723	Wnt Signaling Pathway and Pluripotency	-7.10241	-3.77509	Ccnd1,Ccnd3,Ctbp2,Fzd5,Fzd7,Prkcg,Prkci,Pou5f1,Sox2,Trp53,Mapk9,Ppp2r5c,Nanog,Ctnna1,Gli2,Smad7,Ywhag,Tbl1xr1,Ror2,Sall1
	Reactome Gene Sets	R-MMU-69231	Cyclin D associated events in G1	-5.77052	-2.71941	Ccnd1,Ccnd3,Ccne1,Ccne2,E2f1,Src,Ubb,E2f2,Ctnna1,Ctbp2,Fgf3,Fgf4,Fn1,Fzd5,Fzd7,Gli2,Pias2,Msh6,Nras,Prkcg,Pml,Ptger3,Slc2a1,Trp53,Vegfc,Mapk9,Ralb,Lamc1,Gadd45a,Tfdp2,Hbegf,Cited2,Ulk1,Ywhag,Sfn,Gtse1,Ncoa3,Kat2b,Ccnl1,Cradd,Stk11,Ppp2r5c,Polr2e,Rfc5,Cnot10,Lamtor2,Brd1,Pole4,Psmd1,Epha2,Mcl1,Spp1,Mybl2,Gps2,H2-M5,Ppp1r12a,Nanog,Hdac6,Mif,Sod1,Tdgf1,Ror2
	GO Biological Processes	GO:2001020	regulation of response to DNA damage stimulus	-5.46614	-2.49939	Fxr1,Trip12,Mcl1,Mif,Prkcg,Pml,Trp53,Fxr2,Rif1,Ooep,Arid2,Ubqln4,Wrap53,Kat7,Usp1,Atad5,Ddx11,Ccnd1,Cradd,Gadd45a,E2f1,Epha2,Smarcad1,H2ax,Msh6,Rad23a,Stk11,Xrcc5,Sfn,Ube2d3,Ino80,Rfc5,Psme4,Rbbp5,Zc3h12a,Gli2,Klf4,Src,Resf1,Parn,Tnfsfm13,Pou5f1,F2rl1,Fzd5,Hdac6,Sod1,Mapk9,Ror2,Gps2,Bfar,Pawr,Gpr37l1,Tmem259
	GO Biological Processes	GO:0006325	chromatin organization	-5.42114	-2.49939	Aebp2,Phc1,Smarcad1,Trip12,Hdac6,H2ax,Jarid2,Mtf2,Kat2b,Pml,Pou5f1,Ptma,Smarcb1,Ubtf,Trp53,H2az1,Rif1,Rybp,Resf1,Ino80,Kdm5b,Arid2,Tbl1xr1,Arid1a,Psme4,Jmjd1c,Chd9,Setd1b,Rbbp5,Kat7,Atxn7l3,Brd1,Pim3,Mllt6,Ddx11,Gpx4,F2rl1,Fscn1,Hk2,Pla2g5,Src,Ulk1,Xrcc5,G3bp2,Mapk9,Cdc42ep4,Syt9,Ralb,Ooep,Shcbp1l,Parn,Chchd10,Atl3,Dync1li1,Pias2,Uba2,Mettl21a,Senp3,Vipas39
	Reactome Gene Sets	R-MMU-8878171	Transcriptional regulation by RUNX1	-5.36223	-2.46088	Ccnd1,Ccnd3,Phc1,H2ax,Kat2b,Pml,Smarcb1,Ubb,H2az1,Rybp,Psmd1,Arid2,Arid1a,Psme4,Setd1b,Rbbp5,Aebp2,Gps2,Kdm5b,Tbl1xr1,Kat7,Brd1
	GO Biological Processes	GO:0009880	embryonic pattern specification	-4.94379	-2.13936	Cobl,Fzd5,Nodal,Nrp2,Pcsk6,Tbx3,Tdgf1,Ooep,Nanog,Mtf2,Trp53,Ror2,Cited2,Fgf3,Gli2,Pou5f1,Tgif1,Zic2,Ift52
	GO Biological Processes	GO:0072091	regulation of stem cell proliferation	-4.77019	-2.00715	Aspm,Ctnna1,Ccne1,Ncoa3,Sox2,Tbx3,Trp53,Vegfc,Nanog,Kat7,Shb,Trim71,Gli2,Sall1,Gpr37l1,Igf2bp1,Ss18
	GO Biological Processes	GO:0014908	myotube differentiation involved in skeletal muscle regeneration	-4.71667	-1.99088	Klf5,Cd9,Ptgfrn,Mymx,Ccnd1,Fzd7,Klf4,Mif,Ulk1,Sulf2,Hdac6,Sik1,Six4,P2rx2
	GO Biological Processes	GO:0038092	nodal signaling pathway	-4.64178	-1.94001	Cited2,Nodal,Tdgf1,Tgif1,Zic2,Inhbb,Smad7,Pou5f1,Rbpms,Ror2,Stoml1,Lnpep,Lefty2,Pml,Src,Stk11,Trp53,Nanog,Pcsk6,Tbx3,Ift52
	GO Biological Processes	GO:0000082	G1/S transition of mitotic cell cycle	-4.61756	-1.93807	Ccnd1,Ccnd3,Ccne1,Ccne2,Cradd,E2f1,Klf4,Cdk18,Pml,Trp53,Crlf3,Ino80,Tcf19,Trim71,Mif,Cited2,Rad23a,Src,Tbx3,Ooep,Nanog,Shb,Dync1li1,Atad5,Ddx11,Gadd45a,Sox2,Stk11,Chmp2a,Msh6,Mapk9,N4bp1,Usp1
	GO Biological Processes	GO:0072332	intrinsic apoptotic signaling pathway by p53 class mediator	-4.55783	-1.89953	E2f1,Mif,Pml,Stk11,Trp53,Ubb,Rrn3,Atad5,E2f2,Epha2,Mcl1,Msh6,Uri1,Sod1,Src,Sfn,Cradd
	Reactome Gene Sets	R-MMU-69278	Cell Cycle, Mitotic	-4.25697	-1.73255	Ccnd1,Ccnd3,Ccne1,Ccne2,Cdk11b,E2f1,H2ax,Ppp1r12a,Ranbp2,Src,Trp53,Ubb,Ywhag,Ppp2r5c,Gtse1,H2az1,Pole4,Chmp2a,Psmd1,Rfc5,Bora,Lbr,Psme4,Dync1li1,E2f2,Sfn,Wrap53,Hdac6,Hspa9,Cited2,Rps6ka1,Sod1,Mapk9,Ube2d3,Lamtor2,Fzd5,Fzd7,Prkcg
	GO Biological Processes	GO:0001701	in utero embryonic development	-4.2272	-1.72874	Atp1b1,Cdk11b,Socs3,Elf3,Eno1,Fzd5,Gli2,Hbegf,Klf2,Cited2,Ncoa3,Nodal,Pou5f1,Smarcb1,Tbx3,Tfap2c,Tdgf1,Trp53,Zfp42,Hs6st1,Bysl,Rpl7l1,Ssr2,Ooep,Tbl1xr1,Rrn3,Jmjd1c
	GO Biological Processes	GO:0070848	response to growth factor	-4.2099	-1.72768	E2f1,Epha2,Fgf3,Fgf4,Hdac6,Ier2,Klf4,Smad7,Cited2,Ncl,Nodal,Nrp2,Pml,Pou5f1,Uri1,Sox2,Src,Stk11,Tdgf1,Trp53,Ulk1,Vegfc,Ror2,Nanog,Sulf2,Rap1gap,Dync1li1,Lefty2,Trim71,Ctnna1,Cd9,Fzd5,Jarid2,Klf9,Kat2b,Smarcb1,Tgif1,Cherp,Skap2,Sfn,Arid2,Pawr,Ift52,Idh2
	GO Biological Processes	GO:0098780	response to mitochondrial depolarisation	-4.18314	-1.70811	Hdac6,Hk2,Ulk1,Gps2,Atg14,Src,Ubb,Chmp2a,Wipi2,Lamtor2,Dync1li1,Trp53,Sik1,Slc2a1,Zc3h12a,Inhbb,Ralb,Cd68,Prkcg,Sod1,Spp1,Dctpp1,Tbl1xr1,P2rx2,Lrcol1,Cnn2,Cradd
	GO Biological Processes	GO:0034405	response to fluid shear stress	-4.08392	-1.64906	Klf2,Klf4,Cited2,Spp1,Src,Klf5,Ctnna1,Ebf1
Myc	Reactome Gene Sets	R-MMU-8953854	Metabolism of RNA	-22.5419	-18.2604	Hnrnpa1,Hnrnpk,Hnrnpl,Rps2,Ncl,Nup62,Rnps1,Rpl18,Rpl27,Rpl28,Rps15,Rps17,Rps18,Rps19,Rps5,Rps8,Alyref,Rpl13a,Ubb,Ybx1,Rpl27a,Rps11,Hnrnpu,Nxf1,Ddx39b,Prpf40a,Wdr46,Hnrnph1,Utp3,Ppih,Rpl36al,Nop56,Cstf1,Mphosph10,Ddx39a,Phf5a,Cnot8,Psmd1,Smndc1,Rpl18a,Smg6,Tsr1,Sf3b4,Srsf1,Eif4a3,Tbl3,Etf1,Rpl13,Eif2s1,Eif3a,Eif3k,Eif5,Eef2,Mrpl12,Mrpl57,Mrpl14,Rpl17
	Reactome Gene Sets	R-MMU-212300	PRC2 methylates histones and DNA	-14.6625	-11.381	Ezh2,H2ax,Mtf2,Rbbp4,H2az1,Suz12,H2az2,H3c15,H3c4,H4c18,H2ac7,H2ac8,H2ac10,H2bc7,H2bc8,H2bc21,H2ac23,Smarca5,Mre11a,Ubb,Anapc11,Anapc10,Ube2s,Anapc2,Hsp90ab1,Mcm4,Mcm6,Nek2,Nup62,Pcna,Kif20a,Aurka,Wee1,Nhp2,Ssna1,Sgo2a,Chmp2a,Psmd1,Rmi1,Tubb4b,Ddb1,Brd2,Nap1l4,Ptma,Ring1,Ncor1,Ssrp1,Morf4l1,Hnrnpu,Sart3,Paxip1,Rbm14,Sphk2,Utp3,Pih1d1,Kmt2e,Atad2,Sfpq,Usp36,Setd5,Morc2a,Jmjd6,Bag6,Kmt5c,Map1s,Hspa…
	WikiPathways	WP310	mRNA processing	-14.0506	-10.9152	Ddx5,Eif4g2,Ewsr1,Hnrnpa1,Hnrnpab,Hnrnpk,Hnrnpl,Matr3,Ncl,Rnps1,Son,Alyref,Tial1,Ybx1,G3bp1,Rps11,Hnrnpdl,Hnrnpu,Nxf1,Ddx39b,Sart3,Prpf40a,Rbm14,Hnrnph1,Rbm25,Cstf1,Ddx39a,Phf5a,Sfpq,Sf3b1,Sf3b4,Srsf1,Eif4a3,Srsf7,Luc7l,Ramac,Wdr83,Rprd2,Smndc1,Jmjd6,Rbm15,Alkbh5,Gm21992,Zbtb8os,Atf4,Mlh1,Cnot8,Smg6,Etf1,Ppih,Nup62
	GO Biological Processes	GO:0022613	ribonucleoprotein complex biogenesis	-13.443	-10.3919	Eif2s1,Eif3a,Hsp90ab1,Rps2,Ncl,Prkdc,Rpl27,Rps15,Rps17,Rps19,Rps5,Rps8,Rpl13a,Abce1,G3bp1,Nhp2,Ddx39b,Sart3,Ptges3,Wdr46,Utp3,Luc7l,Nop56,Ramac,Mphosph10,Pih1d1,Usp36,Sf3b1,Tsr1,Srsf1,Tbl3,Eif5,Atxn2l
	GO Biological Processes	GO:0006412	translation	-13.1918	-10.2325	Eef2,Eif2s1,Eif3a,Eif4g2,Hnrnpl,Rps2,Matr3,Ncl,Pkm,Prkdc,Rpl18,Rpl28,Rps15,Rps17,Rps18,Rps19,Rps5,Rps8,Rpl13a,Abce1,Rpl27a,Rps11,Ddx39b,Mrpl12,Mrpl57,Paip2,Mrpl14,Cnot8,Aarsd1,Yars2,Eif3k,Rpl18a,Ppp1r15b,Eif4a3,Eif5,Etf1,Tufm,Rpl13,Rpl17,Gart,Sphk2,Plk3,Ddx5,Ncor1,Ybx1,Hnrnpu,Alkbh5
	GO Biological Processes	GO:0006403	RNA localization	-10.5053	-7.80351	Cct4,Cetn3,Hnrnpa1,Nup62,Rps15,Alyref,Ybx1,Abce1,Hnrnpu,Nxf1,Ddx39b,Ranbp17,Tomm20,Ddx39a,Pih1d1,Sfpq,Srsf1,Srsf7,Alkbh5,Slc29a1,Slc35b2,Ddx5,Hsp90ab1,Hspa9,Kpna2,Pik3r2,Tnpo2,Ipo7,Smad7,Ssna1
	GO Biological Processes	GO:2001252	positive regulation of chromosome organization	-9.06038	-6.52402	Cct4,Cct5,Cct6a,Cct7,Mre11a,Mtf2,Nek2,Ncor1,Hnrnpu,Sart3,Paxip1,Sphk2,Anapc11,Sgo2a,Pih1d1,Kmt2e,Sfpq,Morc2a,Rnf4,Ssrp1,Atad2,Setd5,Smg6,Map1s,Ezh2,Thumpd3,Suz12,Ramac,Atpsckmt,Mettl23,Trmt10a,Etf1,Rbm15,Kmt5c,Smyd4,Morf4l1,Uba2,Senp8,Jmjd6,Bag6,Dhps,Ddb1,Ring1,Rbm14,Usp36,Nup62,G3bp1,Arhgap35
	GO Biological Processes	GO:0042274	ribosomal small subunit biogenesis	-7.95017	-5.52789	Rps2,Prkdc,Rps15,Rps17,Rps19,Rps5,Rps8,Wdr46,Utp3,Tsr1,Tbl3,Ncl,Rpl27,Abce1,Nhp2,Nop56,Mphosph10,Pih1d1,Usp36,Thumpd3,Zfp143,Zbtb8os,Trir,Aarsd1,Yars2,Ints7,Trmt10a,Ints5
	GO Biological Processes	GO:0051054	positive regulation of DNA metabolic process	-7.67123	-5.27617	Gfer,Cacybp,Cct4,Cct5,Cct6a,Cct7,Hsp90ab1,Mlh1,Mre11a,Nek2,Pcna,Prkdc,Ddx39b,Paxip1,Ptges3,Otud4,Morc2a,Kmt5c,Atad5,Hnrnpu,Nhp2,Smg6,Fignl1,Dtl,Pih1d1,Canx,H2-DMa,Hspa9,P4hb,Ppih,Gng3,Rcn3,Ankrd11,Smad7,Usp36,Bag6,Ezh2,Aurka
	GO Biological Processes	GO:0010564	regulation of cell cycle process	-6.8087	-4.46667	Birc6,Ccnf,Plk3,Ddb1,Ezh2,Hsp90ab1,Mre11a,Nek2,Nup62,Prkdc,Kif20a,Rnf4,Aurka,Hnrnpu,Crlf3,Paxip1,Prpf40a,Rbm14,Anapc11,Cltc,Sgo2a,Chmp2a,Kmt2e,Sfpq,Dtl,Sde2,Atad5,Rpl17,Mcm4,Mcm6,Pcna,Son,Wee1,Ube2s,Ddx39b
	GO Biological Processes	GO:0065004	protein-DNA complex assembly	-6.49788	-4.17185	Brd2,Mcm4,Mcm6,Nap1l4,Rbbp4,Rnf4,Sart3,Cand1,Smarca5,H3c15,H3c4,H4c18,H2bc7,H2bc21,Ptma,Ezh2,Suz12,Kmt2e,Kmt5c,Map1s,Mre11a,Hsp90ab1,Ptges3,H2bc8,Gng3,Pik3r2,Rxrb,Jmjd6
	Reactome Gene Sets	R-MMU-5693532	DNA Double-Strand Break Repair	-6.392	-4.08817	H2ax,Kpna2,Mre11a,Pcna,Prkdc,Ubb,Paxip1,Rmi1,Smarca5,H4c18,H2bc7,H2bc8,H2bc21,Mcm4,Mcm6,Wee1,Anapc11,Sgo2a,Anapc10,Psmd1,Ube2s,Anapc2,Ube2d3,Atf4,Ddb1,Hnrnpk,Pik3r2,Pkm,Irf3
	CORUM	CORUM:3047	Parvulin-associated pre-rRNP complex	-6.14014	-3.85422	Ddx5,Ncl,Rpl18,Rps8,Rpl13a,Nop56,Rpl18a,Rpl13
	GO Biological Processes	GO:0002181	cytoplasmic translation	-5.91798	-3.64502	Eef2,Eif3a,Rps2,Pkm,Rpl18,Rpl13a,Rpl18a,Eif5,Etf1,Rpl17,Eif2s1,Eif4g2,Abce1,Paip2,Eif3k,Ppp1r15b
	Reactome Gene Sets	R-MMU-179409	APC-Cdc20 mediated degradation of Nek2A	-5.71351	-3.46717	Nek2,Ubb,Anapc11,Anapc10,Ube2s,Anapc2,Rnf4,Ube2d3,Birc6,Ccnf,Ddb1,Hsp90ab1,Rps2,Smad7,Sqstm1,Ring1,Rnf7,Ube2m,Suz12,Paxip1,Rnf151,Cand1,Dtl,Arrdc3,Med21,Sde2,Uba2,Aurka,Psmd1,Mcm4,Mcm6,Pcna,Wee1,Prkdc,Cops4,Canx,Sec31a,Plk3,Usp36,Bag6,Sgo2a,Chmp2a,Tubb4b,Rcn3,Pik3r2
	GO Biological Processes	GO:0051301	cell division	-5.45812	-3.23726	Birc6,Ccnf,Cetn3,Plk3,Nek2,Nup62,Kif20a,Son,Aurka,Tial1,Wee1,Ybx1,Hnrnpu,Fubp1,Prpf40a,Anapc11,Cltc,Sgo2a,Chmp2a,Anapc10,Ube2s,Anapc2,Sde2,Ska3,Ccdc124
	Reactome Gene Sets	R-MMU-159236	Transport of Mature mRNA derived from an Intron-Containing Transcript	-5.05487	-2.8561	Nup62,Rnps1,Alyref,Nxf1,Ddx39b,Ddx39a,Srsf1,Eif4a3,Cstf1,Smg6,Etf1,Eif2s1,Eif3a,Eif4g2,Eif5,Ddx5,Mlh1,Cnot8,Ybx1,Hnrnpu,Trir,Alkbh5
	GO Biological Processes	GO:0046606	negative regulation of centrosome cycle	-4.22654	-2.14166	Ccnf,Nek2,Rbm14,Chmp2a,Plk3,Srgap2,Mlh1,Nup62,Kif20a,Rnf4,Ncor1,Son,Aurka,Wee1,Hnrnpu,Fignl1,Cltc,Gas2l1,Hook2,Ska3,Tubb4b,Map1s
	GO Biological Processes	GO:0045786	negative regulation of cell cycle	-4.21417	-2.13646	Ccnf,Plk3,Ezh2,H2ax,Hsp90ab1,Mre11a,Nek2,Prkdc,Aurka,Wee1,Ddx39b,Crlf3,Rbm14,Chmp2a,Kmt2e,Dtl,Ints7,Gas2l1,Sde2,Smg6
	GO Biological Processes	GO:0006974	cellular response to DNA damage stimulus	-4.07579	-2.01954	Cbx5,Plk3,Ddb1,Ddx5,H2ax,Hnrnpk,Mcm4,Mcm6,Mlh1,Mre11a,Pcna,Prkdc,Ssrp1,Morf4l1,Ddx39b,Paxip1,Fignl1,Ube2d3,Sfpq,Rmi1,Morc2a,Dtl,Ints7,Bag6,Kmt5c,Atad5,Ezh2,Cacybp,Rbbp4,Sde2
PRC	GO Biological Processes	GO:0007389	pattern specification process	-100	-95.718	Alx4,Nr2f2,Barx1,Bmi1,Bmp2,Bmp7,Cdx2,Cyp26a1,Dbx1,Dll1,Dlx1,Dlx2,Egr2,Emx1,Emx2,En1,Eomes,Nr2f1,Fgf8,Foxc2,Fst,Gbx2,Gdnf,Gsc,Gsx2,Hand1,Hand2,Hes5,Hey2,Foxf1,Foxg1,Foxd1,Mnx1,Foxa1,Foxa2,Hoxa1,Hoxa2,Hoxa3,Hoxa4,Hoxa5,Hoxa7,Hoxb1,Hoxb3,Hoxb4,Hoxb5,Hoxb7,Hoxb8,Hoxc5,Hoxc6,Hoxc8,Hoxc9,Hoxd13,Hoxd8,Hoxd9,Ihh,Irx1,Irx2,Irx3,Mafb,Lbx1,Lef1,Lhx1,Lhx2,Lmx1b,Smad6,Ascl1,Meis1,Foxc1,Msx1,Msx2,Nbl1,Neurog1,…
	GO Biological Processes	GO:0060322	head development	-73.3028	-69.623	Nr2f2,Arx,Neurog2,Bmi1,Bmp2,Bmp7,Cbln1,Col2a1,Col4a1,Twist2,Dll1,Dlx1,Dlx2,Dlx5,Dlx6,Efna5,Egr2,Emx1,Emx2,En1,En2,Eomes,Epha7,Nr2f1,Fgf8,Fgfr3,Gata2,Gbx2,Gsc,Gsx1,Gsx2,Hes5,Foxg1,Hmga2,Hmx2,Hmx3,Foxa2,Hoxa1,Hoxa2,Hoxb1,Hoxb3,Ihh,Kcna1,Mafb,Lef1,Lhx1,Lhx2,Lhx5,Lhx6,Lmx1b,Ascl1,Meis1,Foxc1,Msx1,Neurod2,Nfix,Nr4a3,Nrp2,Ntrk2,Nr4a2,Otp,Otx1,Otx2,Pax2,Pax5,Pax6,Pax9,Pdgfra,Pitx1,Pitx2,Phox2b,Pou3f3,Pr…
	GO Biological Processes	GO:0045165	cell fate commitment	-70.7745	-67.191	Nr2f2,Arx,Neurog2,Bmp2,Dbx1,Dhh,Dll1,Dlx1,Dlx2,Ebf2,Eomes,Fgf8,Fgfr3,Foxc2,Gata2,Gata6,Gsc,Gsx1,Gsx2,Nkx6-2,Hand1,Hes5,Hey2,Foxg1,Mnx1,Foxa1,Foxa2,Onecut1,Hoxa13,Hoxa2,Ihh,Lbx1,Lhx6,Ascl1,Neurog1,Nkx2-2,Nkx2-5,Otx2,Pax2,Pax3,Pax6,Pax7,Pitx1,Prox1,Shh,Six1,Six2,Sox17,Sox6,Sox9,T,Tal1,Tbr1,Tbx1,Tbx2,Tbx4,Tbx5,Hnf1b,Tfap2c,Nkx2-1,Nr2e1,Tlx1,Wnt1,Wnt10a,Wnt10b,Wnt11,Wnt2b,Wnt6,Wnt7b,Wt1,Tlx3,Dll4,Fez…
	GO Biological Processes	GO:0007423	sensory organ development	-58.406	-55.124	Bmp2,Bmp7,Cdkn1c,Cebpa,Col2a1,Col4a1,Cux1,Twist2,Dll1,Dlx1,Dlx2,Dlx5,Dlx6,Eya4,Fgf8,Fgf9,Fgfr3,Foxc2,Foxf2,Flt1,Gata2,Gbx2,Gsc,Hand2,Hes5,Hey2,Foxg1,Hmx2,Hmx3,Hoxa1,Hoxa13,Hoxa2,Ihh,Mafb,Lef1,Lhx1,Lhx2,Lmx1b,Mab21l1,Maf,Mapkapk2,Ascl1,Meis1,Foxc1,Msx1,Neurog1,Nkx2-5,Nr4a3,Ntn1,Ntrk2,Otx1,Otx2,Pax2,Pax6,Pdgfra,Pitx2,Phox2b,Pou4f2,Pou4f3,Prox1,Aldh1a2,Frzb,Shh,Six1,Six2,Six3,Six6,Sox9,Tbx1,Tbx2,Tfa…
	GO Biological Processes	GO:0048729	tissue morphogenesis	-50.0379	-46.835	Bmp2,Bmp7,Col4a1,Dll1,Eomes,Epha7,Fgf8,Fgfr3,Foxc2,Foxf2,Flt1,Fst,Fzd1,Gbx2,Gdnf,Hand1,Hand2,Hes5,Hey2,Foxq1,Foxf1,Foxd1,Hmga2,Foxa1,Foxa2,Hoxa13,Hoxa5,Hoxb13,Hoxb4,Hoxb7,Hoxd13,Ihh,Irx1,Irx2,Irx3,Lbx1,Lef1,Lhx1,Lhx2,Foxc1,Msx1,Msx2,Myl3,Nfatc1,Nkx2-5,Nr4a3,Nrp2,Ntn1,Pax2,Pax3,Pax7,Pcdh8,Pdgfa,Pdgfra,Pdx1,Pitx2,Prox1,Aldh1a2,Frzb,Shh,Six1,Six2,Six3,Slit2,Sox17,Sox9,T,Tal1,Tbr1,Tbx1,Tbx2,Tbx4,Tbx5…
	GO Biological Processes	GO:0048663	neuron fate commitment	-38.0352	-35.008	Dbx1,Dll1,Dlx1,Dlx2,Gata2,Gsx1,Gsx2,Foxg1,Mnx1,Foxa1,Foxa2,Ihh,Lbx1,Lhx6,Ascl1,Nkx2-2,Otx2,Pax3,Pax6,Pax7,Shh,Six1,Tbr1,Tfap2c,Nkx2-1,Wnt1,Tlx3,Dll4,Fezf2,Bcl11b,Olig3,Hoxc10,Satb2,Dmrt3,Dmrta2,Fev,Gdnf,Hoxb8,Lhx1,Lhx5,Sox6,Tal1,Uncx,Vldlr,Zic1,Foxb1,Rfx4,Foxp1,Gdf7,Smo,En1,Fgf8,Gsc,Hoxa2,Lhx2,Lmx1b,Smad6,Nbl1,Six3,Vax2,Hoxb2,Sp8
	GO Biological Processes	GO:0060485	mesenchyme development	-34.4715	-31.551	Bmp2,Bmp7,Cyp26a1,Eomes,Fgf8,Fgf9,Foxc2,Gbx2,Gdnf,Gsc,Hand1,Hand2,Hey2,Foxf1,Foxd1,Foxa1,Foxa2,Hoxa5,Lef1,Foxc1,Msx1,Msx2,Nfatc1,Nkx2-5,Nrp2,Pax1,Pax2,Pax3,Pax6,Pitx2,Phox2b,Aldh1a2,Sema3f,Sema5b,Sema6a,Frzb,Shh,Six1,Six2,Sox9,Tbx1,Tbx2,Tbx5,Tcf21,Tfap2a,Nkx2-1,Twist1,Wnt10a,Wnt11,Wnt7b,Wt1,Zic2,Zeb2,Crb2,Smo,Cyp26c1,Fzd1,Gata6,Hes5,Hoxa7,Hoxb4,Ascl1,Pdgfra,Pdx1,Six3,Sox17,Sox6,T,Tal1,Hnf1b,Prick…
	GO Biological Processes	GO:0030855	epithelial cell differentiation	-32.5305	-29.646	Nr2f2,Arx,Barx1,Bmp2,Bmp7,Cdkn1c,Cdx2,Cux1,Dll1,Dlx3,Dlx5,Dlx6,Emx1,Fgf8,Fgfr3,Foxc2,Fzd1,Gata6,Gdnf,Hes5,Hey2,Foxf1,Foxa1,Foxa2,Onecut1,Hoxa13,Hoxa5,Hoxa7,Hoxb13,Hoxb5,Ihh,Lef1,Lhx1,Maf,Ascl1,Foxc1,Msx2,Nkx2-2,Nkx6-1,Pax2,Pax6,Pdx1,Pou4f3,Prox1,Frzb,Six1,Six2,Six3,Sox17,Sox9,Tbx1,Hnf1b,Tcf21,Tfap2a,Tfap2c,Nkx2-1,Wnt1,Wnt10b,Wnt11,Wnt7b,Wt1,Zeb2,Foxl2,Foxe3,Insm1,Fzd2,Bcl11b,Foxb1,Atoh8,Foxp1,Ccn…
	GO Biological Processes	GO:0007409	axonogenesis	-31.6461	-28.811	Arx,Neurog2,Bmp7,Cdh11,Dlx5,Efna5,Egr2,Epha7,Bcl11a,Fgf8,Fgfr3,Gbx2,Gdnf,Foxg1,Foxd1,Mnx1,Hoxa1,Hoxa2,Lhx1,Lhx2,Nkx2-9,Nkx6-1,Nr4a3,Nptx1,Nrp2,Ntn1,Ntrk2,Nr4a2,Otx2,Pax6,Phox2b,Pou4f2,Pou4f3,Sema3f,Sema5b,Sema6a,Shh,Slit2,Snap91,Tbr1,Nkx2-1,Nr2e1,Vax1,Wnt7b,Zic2,Vax2,Zeb2,Fezf2,Bcl11b,Bhlhe22,Foxb1,Plxnd1,Nrn1,Fezf1,Prdm8,Barhl2,Unc5b,Foxp1,Lmx1a,Ntng2,Rtn4rl1,Gdf7,Plxna4,Disc1,Smo,Islr2,Flrt2,Rt…
	GO Biological Processes	GO:0021871	forebrain regionalization	-28.9672	-26.229	Bmp2,Emx1,Emx2,Eomes,Nr2f1,Fgf8,Gsx2,Lhx1,Lhx2,Otx2,Pax6,Shh,Six3,Nkx2-1,Wnt1,Wnt2b,Wnt7b,Fezf2,Bhlhe22,Fezf1,Dmrta2
	GO Biological Processes	GO:0048880	sensory system development	-27.2857	-24.616	Bmp7,Cdkn1c,Col4a1,Twist2,Dll1,Dlx1,Dlx2,Fgf9,Fgfr3,Foxc2,Foxf2,Flt1,Hes5,Ihh,Lhx1,Lhx2,Lmx1b,Mab21l1,Maf,Meis1,Foxc1,Ntrk2,Otx2,Pax2,Pax6,Pdgfra,Pitx2,Phox2b,Pou4f2,Prox1,Aldh1a2,Shh,Six3,Six6,Sox9,Tbx2,Tfap2a,Nr2e1,Twist1,Vax1,Wt1,Tenm3,Vax2,Zeb2,Foxl2,Foxe3,Irx5,Dll4,Bcl11b,Bhlhe22,Irx6,Mfsd2a,Dio3,Osr2,Foxp2,Bhlhe23,Sdk2,Crb2,Tmem132e
	GO Biological Processes	GO:0045664	regulation of neuron differentiation	-27.2564	-24.597	Adcy6,Adra2c,Neurog2,Bmp2,Bmp7,Cpeb1,Cux1,Dll1,Dlx1,Dlx2,Efna5,Epha7,Nr2f1,Bcl11a,Fzd1,Gata2,Hes5,Hey2,Foxg1,Foxa1,Foxa2,Hoxa2,Irx3,Lbx1,Ascl1,Meis1,Nbl1,Neurod2,Neurog1,Nkx2-2,Nkx2-5,Nkx6-1,Ntn1,Ntrk2,Pax6,Prkd1,Phox2b,Pou4f2,Prox1,Sema3f,Sema5b,Sema6a,Sez6,Shh,Six1,Six3,Slit2,Snap91,Sox9,Syt2,Tbr1,Tfap2a,Nr2e1,Trp73,Vldlr,Tenm3,Zeb2,Tlx3,Fezf2,Bcl11b,Plxnd1,Ndnf,Fezf1,Mfsd2a,Barhl2,Lmx1a,Ntng2,…
	WikiPathways	WP2074	Neural Crest Differentiation	-26.8774	-24.276	Bmp7,Col2a1,Dll1,Dlx5,Fgf8,Fgfr3,Gbx2,Hand1,Hes5,Hey2,Hoxa1,Hoxb1,Lhx1,Lhx2,Lhx5,Ascl1,Msx2,Msx3,Neurog1,Pax3,Pax7,Phox2b,Sox9,Tfap2a,Tfap2b,Twist1,Wnt1,Zic1,Dll4,Zic5,Olig3,Dmbx1
	GO Biological Processes	GO:0061061	muscle structure development	-26.6254	-24.042	Alx4,Nr2f2,Barx2,Bmp2,Cacnb4,Comp,Dll1,Egr2,Eomes,Fgf8,Fgf9,Foxc2,Fzd1,Gata6,Gsc,Hand1,Hand2,Hey2,Foxf1,Hlx,Mnx1,Hoxd9,Lbx1,Lef1,Smad6,Meis1,Foxc1,Msx1,Myl3,Neurog1,Nfatc1,Nkx2-5,Pax3,Pax5,Pax7,Pdgfra,Pitx1,Pitx2,Phox2b,Prkg1,Prox1,Shh,Six1,Sox6,Sox9,T,Tbx1,Tbx2,Tbx5,Tcf21,Trp73,Twist1,Vax1,Wnt1,Wnt10b,Wnt7b,Wt1,Foxl2,Dll4,Fzd2,Cxcl14,Smarca2,Nebl,Tbx18,Prickle1,Foxp1,Foxp2,Pdlim2,Vgll2,Prdm6,Cyp…
	GO Biological Processes	GO:0030902	hindbrain development	-26.3591	-23.808	Bmp7,Cbln1,Dll1,Egr2,En1,En2,Gata2,Gbx2,Gsx2,Foxa2,Hoxa1,Hoxa2,Hoxb1,Hoxb3,Mafb,Lef1,Lhx1,Lhx5,Lmx1b,Ascl1,Foxc1,Neurod2,Nfix,Otx1,Otx2,Pax6,Phox2b,Prox1,Aldh1a2,Sez6,Shh,Tbr1,Hnf1b,Wnt1,Rfx4,Hoxb2,Lmx1a,Foxp2,Smo
	GO Biological Processes	GO:0035107	appendage morphogenesis	-26.1594	-23.633	Alx4,Bmp7,Col2a1,Dlx5,Dlx6,En1,Evx2,Fgf8,Fgf9,Hand2,Hoxa13,Hoxd13,Hoxd9,Ihh,Lef1,Lmx1b,Msx1,Msx2,Pcsk5,Pitx1,Pitx2,Aldh1a2,Shh,Sox9,Sall3,Tbx2,Tbx4,Tbx5,Tfap2a,Tfap2b,Twist1,Pkdcc,Osr2,Hoxc11,Hoxc10,Cyp26b1,Zbtb16,Sp8,Sp9,Nr2f2,Comp
	GO Biological Processes	GO:0003007	heart morphogenesis	-25.7567	-23.26	Bmp2,Bmp7,Col2a1,Dll1,Eomes,Fgf8,Fgf9,Foxc2,Fzd1,Gata6,Hand1,Hand2,Hey2,Foxf1,Ihh,Lbx1,Smad6,Foxc1,Msx1,Msx2,Myl3,Nfatc1,Nkx2-5,Nrp2,Pitx2,Prox1,Aldh1a2,Shh,Six1,Slit2,Sox17,Sox9,T,Tbr1,Tbx1,Tbx2,Tbx5,Tfap2a,Twist1,Wnt11,Dll4,Fzd2,Plxnd1,Nsd2,Smo,Zmiz1,Flrt2,Hoxa13,Meis1,Pax3,Pcsk5,Pdgfra,Pou4f2,Prkg1,Sox6,Trp73,Wt1,Irx4,Nebl,Tbx18,Prickle1,Foxp1,Pdlim2,Foxa2,Gsc,Pax7
	GO Biological Processes	GO:0035282	segmentation	-23.46	-21.035	Cdx2,Dll1,Egr2,Foxc2,Hes5,Foxf1,Foxa2,Hoxa2,Irx1,Irx2,Irx3,Mafb,Lef1,Lhx1,Foxc1,Neurog1,Nrp2,Otx2,Pax1,Pax3,Pcdh8,Aldh1a2,Sema3f,T,Wt1,Zeb2,Foxb1,Tbx18,Dmrt2,Crb2,Ihh,Frzb,Shh,Six1,Wnt1,Wnt11,Smo,Bmp7,Eomes,Fgf8,Hand1,Lhx2,Nr4a3,Pax2,Six2,Tal1,Tbx1,Zic2,Gata6,Sox17,Hnf1b,Atoh8,Osr2
	GO Biological Processes	GO:0055123	digestive system development	-21.2667	-18.909	Alx4,Barx1,Cdkn1c,Cdx2,Fgf9,Fgfr3,Foxf2,Gata6,Foxf1,Hlx,Hoxa5,Hoxd13,Ihh,Ascl1,Nkx2-2,Nkx2-3,Pcsk5,Pdgfa,Pdgfra,Pdx1,Pitx2,Aldh1a2,Shh,Six2,Sox17,Tbx2,Hnf1b,Tcf21,Trp73,Pkdcc,Smo
	GO Biological Processes	GO:0048589	developmental growth	-20.9339	-18.606	Arx,Cdkn1c,Comp,Dll1,Efna5,Emx1,En1,Epha7,Bcl11a,Fgf8,Fgf9,Fgfr3,Foxc2,Gata6,Hey2,Hlx,Hmga2,Hoxa5,Hoxd13,Ihh,Lhx1,Lhx2,Lmx1b,Meis1,Foxc1,Msx2,Nkx2-5,Nkx6-1,Nrp2,Ntn1,Pax7,Pdgfra,Pou4f2,Pou4f3,Prkg1,Prox1,Sema3f,Sema5b,Sema6a,Shh,Six1,Six3,Slit2,Sox9,Syt2,Tbx2,Tbx5,Hnf1b,Tfap2c,Trp73,Wnt10b,Wnt11,Wnt7b,Wt1,Zeb2,Nrn1,Mfsd2a,Nkd1,Barhl2,Pkdcc,Dio3,Foxp1,Dmbx1,Helt,Plxna4,Disc1,Kif26b,Smo,Islr2,Zmiz1…
PCGF	KEGG Pathway	mmu04540	Gap junction	-4.85572	-0.574	Drd5,Gnas,Prkg1,Grm5,Gucy1a2,Bst1,Pclo,Adgrl1,Kcnu1
	KEGG Pathway	ko04020	Calcium signaling pathway	-3.37326	0	Camk4,Drd5,Gnas,Phkg2,Grm5,Gabra3,Amph
	GO Biological Processes	GO:0040013	negative regulation of locomotion	-2.8985	0	Drd5,Srgap2,Prkg1,Magi2,Mctp1,Grm5
	GO Biological Processes	GO:0030032	lamellipodium assembly	-2.72283	0	Srgap2,Akirin1,Fgd4
	GO Biological Processes	GO:0002028	regulation of sodium ion transport	-2.37713	0	Gnas,Nkain3,Nkain2,Dpp6,Kcnu1,Prkg1
	GO Biological Processes	GO:0045807	positive regulation of endocytosis	-2.37651	0	Dcx,Pros1,Magi2,Ahi1,Mctp1,Rab3d,Pclo
	GO Biological Processes	GO:0007416	synapse assembly	-2.35242	0	Pclo,Magi2,Lrfn5,Adgrl1,Pcdhb8,Grm5,Sybu
	GO Biological Processes	GO:0051099	positive regulation of binding	-2.29024	0	Mbd2,Larp6,Derl1,Spon1
	KEGG Pathway	ko04972	Pancreatic secretion	-2.26634	0	Bst1,Gnas,Rab3d,Prkg1,Pclo,Ahi1,Mctp1,Sybu
	GO Biological Processes	GO:0072009	nephron epithelium development	-2.16571	0	Hs2st1,Ahi1,Basp1
	GO Biological Processes	GO:0021987	cerebral cortex development	-2.14456	0	Dcx,Srgap2,Btbd3,Prkg1,Ahi1,Macrod2,Tox
PAF	Reactome Gene Sets	R-MMU-975956	Nonsense Mediated Decay (NMD) independent of the Exon Junction Complex (EJC)	-64.5872	-60.306	Rplp0,Rpsa,Rps2,Pabpc1,Rpl18,Rpl19,Rpl26,Rpl28,Rpl29,Rpl32,Rpl37a,Rpl6,Rpl7,Rpl9,Rps15,Rps16,Rps18,Rps19,Rps24,Rps29,Rps3a1,Rps5,Rps6,Rps7,Rps8,Rpl13a,Rpl27a,Rpl8,Rps3,Rpl7a,Rps11,Rpl3,Rps26,Rps28,Rplp1,Rpl35a,Rpl23,Rpl15,Rps21,Rpl11,Rps10,Rpl14,Rplp2,Rpl37,Rps20,Rpl38,Rpl4,Rps13,Rpl34,Rps25,Rpl18a,Rps9,Rpl31,Etf1,Rps15a,Rpl23a,Rpl12,Rpl13,Rpl5,Rbm8a,Smg7,Smg1,Eif4a1,Eif4a2,Eif4ebp1,Eif2s2,Eif5,R…
	WikiPathways	WP310	mRNA processing	-31.312	-28.373	Hnrnpd,Cirbp,Clk1,Ddx5,Dhx9,Eif4a2,Eif4g2,Hnrnpa1,Hnrnpab,Hnrnpk,Hnrnpl,Matr3,Ncl,Npm1,Pabpc1,Ptbp1,Raly,Rpl19,Rpl26,Rpl32,Rpl7,Rpl9,Rps24,Rps29,Rps6,Rps7,Srsf3,Srsf5,Tra2b,Son,Supt5,Ybx1,Fxr2,Rpl8,G3bp1,Rps11,Hnrnpdl,Hnrnpu,Rbm34,Nxf1,Hnrnpa2b1,Ddx39b,Rps28,Acin1,Rbm14,Hnrnph1,Pcbp4,Rbm8a,Nip7,Rpl11,Rpl37,Rps20,Rpl38,Mak16,Srsf6,Rps13,Ddx39a,Dnajc8,Dhx16,Sfpq,Dis3,Hnrnpll,Rps9,Sf3b4,Igf2bp3,Rbm3…
	Reactome Gene Sets	R-MMU-212165	Epigenetic regulation of gene expression	-28.3261	-25.406	Actb,H3f3a,H3f3b,H2ax,Mybbp1a,Rbbp4,Polr1c,H2az1,Polr1h,Polr2e,H2bc4,Taf1d,H3c15,H3c7,H3c3,H3c4,H3c2,H4c4,H4c9,H4c12,H2ac6,H2ac7,H2ac8,H2ac11,H2ac12,H2ac15,H2ac4,H2ac10,H2ac20,H2bc7,H2bc8,H2bc11,H2bc12,H2ac13,H4c1,H2bc23,H2bc24,H4c17,Ncaph2,Smc4,Hmg20b,Mta2,Gps2,Chd4,Ccnd1,Cdk4,Rps2,Carm1,Setd6,Kat8,Kdm5b,Smarcd1,Hat1,Brd1,Kmt5c,Jade1,Daxx,Cdk2,Cdkn1a,Csnk2b,Dync1h1,Hsp90ab1,Hsp90aa1,Mcm3,Mcm7,Ra…
	GO Biological Processes	GO:0006417	regulation of translation	-19.6549	-17.028	Hnrnpd,Calr,Cdk4,Cirbp,Cnbp,Dapk3,Dhx9,Eef2,Eif4ebp1,Eif4ebp2,Eif4g2,Enc1,Gapdh,Rack1,Hnrnpl,Matr3,Ncl,Npm1,Pa2g4,Pml,Ptbp1,Rpl26,Rps3a1,Rpl13a,Zfp36,Fxr2,Rps3,Ddx39b,Rplp1,Rpl38,Paip2,Trnau1ap,Hnrnpll,Rps9,Cnot10,Nat10,Igf2bp3,Alkbh1,Ythdf2,Unk,Eif5,Abcf1,Etf1,Zc3h12a,Sesn2,Tardbp,Gcn1,Cnot3,Cnot1,Nanos3,Eif5a,Trim71,Rpl5,Plk3,Hap1,Nfe2l2,Apex1,Ddx5,Ybx1,Hnrnpu,Hnrnpa2b1,Pcbp4,Xpo5,Zc3h10,Fus
	GO Biological Processes	GO:0022618	ribonucleoprotein complex assembly	-15.6856	-13.255	Rplp0,Cirbp,Dhx9,Dync1h1,Hsp90ab1,Hsp90aa1,Rpsa,Rps2,Rpl6,Rps15,Rps19,Rps5,Ruvbl2,Rpl13a,G3bp2,G3bp1,Rpl3,Usp39,Ddx39b,Rps28,Ptges3,Isy1,Nip7,Rpl11,Rps10,Eif2s2,Rpl38,Srsf6,Pih1d1,Rps25,Nop2,Eif5,Atxn2l,Cnot1,Ppan,Rpl23a,Rpl5,Npm1,Rpl10a,Rpl26,Rpl7,Rpl7a,Nhp2,Rpl35a,Rpl7l1,Rpl14,Mak16
	GO Biological Processes	GO:0006974	cellular response to DNA damage stimulus	-10.9351	-8.631	Apex1,Bax,Cbx3,Cbx5,Ccnd1,Cdk2,Cdkn1a,Plk3,Ddx5,Dhx9,Epha2,Gnl1,H2ax,Hnrnpk,Zbtb7a,Mcl1,Mcm3,Mcm7,Msh6,Npm1,Pml,Rad23a,Rpl26,Ruvbl2,Stk11,Timeless,Tpt1,Fxr2,Rps3,Polg2,Rif1,Ppp1r10,Ddx39b,Fzr1,Pias4,Pnkp,Pcbp4,Donson,Pycard,Fbxo5,Ooep,Aen,Pwwp3a,Smc4,Sfpq,Hsf2bp,Rmi1,Mgme1,Shld2,Rfc4,Kif22,Alkbh1,Bag6,Ino80d,Usp1,Zc3h12a,Sesn2,Kmt5c,Smg1,Parp3,Atad5,Iffo1,Dna2,Gfer,Hnrnpd,Cct6a,H1f3,Hsp90ab1,Hsp9…
	WikiPathways	WP307	Translation Factors	-10.5992	-8.313	Eef2,Eif1a,Eif4a1,Eif4a2,Eif4ebp1,Eif4ebp2,Eif4g2,Pabpc1,Eif1,Eef1b2,Eef1g,Eif2s2,Eif5,Etf1,Eif5a,Rps2,Npm1,Rpl13a,Paip2,Alkbh1,Ythdf2,Abcf1,Ran,Sumo1,Fxr2,Nxf1,Ddx39b,Acin1,Rbm8a,Xpo5,Thoc6
	GO Biological Processes	GO:0006403	RNA localization	-10.4105	-8.129	Dhx9,Flot1,Hnrnpa1,Npm1,Ran,Rps15,Srsf3,Ybx1,Zfp36,G3bp2,Hnrnpu,Nxf1,Hnrnpa2b1,Ddx39b,Nop58,Ranbp17,Tomm20,Ddx39a,Pih1d1,Sfpq,Xpo5,Igf2bp3,Srsf7,Hnrnpa3,Ddx19b,Eif5a,Thoc6,Slc29a1,Slc35b2,Slc17a9,Calr,Hspa9,Ranbp3,Hap1,Smad7,Pip5k1c,Ift80,Ssna1,Usp46,Srsf5,Rbm8a,Srsf6,Zfp473
	GO Biological Processes	GO:0016458	gene silencing	-10.133	-7.887	Cdk2,Ddx5,Dhx9,H1f3,H2ax,Pabpc1,Zfp36,H1f2,H2az1,Rif1,Hnrnpa2b1,Ddx17,Xpo5,Cnot10,H1f1,H3c15,Zc3h10,Hat1,Baz2a,Zc3h12a,Cnot3,Cnot1,H3c4,H3c2,H2ac6,H2ac7,H2ac8,H2ac11,H2ac12,H2ac15,H2ac4,H2ac10,H2ac20,H2ac13,Kmt2d,Trim71,Ubb,Ubc,Klf2,Eif1,Zfp57,Hnrnpu,Zmiz2,Smarcd1,Actb,Adrm1,Ino80d,Smad7,Usp12,Tab1,Tomm20,Rad23a
	WikiPathways	WP1763	PluriNetWork: mechanisms associated with pluripotency	-9.90244	-7.685	Klf5,Ccnd1,Cdk2,Cdkn1a,Ctbp2,Dhx9,Fgf4,H3f3a,Klf2,Kpna2,Smad7,Mybl2,Ncl,Nodal,Pml,Rbbp4,Sos1,Zfp143,Sumo1,Zfp42,Zfp57,Mta2,Hnrnpu,Rif1,Pias4,Nacc1,Zfp219,Nanog,Sall4,Chd4,Pim3,Jade1,Zscan10,Kmt2d,Eif4a2,Rps16,Srsf3,Srm,Spry4,Mkrn1,Stoml1,Kdm5b,Sbno2,Srsf7,Mat2a
	GO Biological Processes	GO:0072331	signal transduction by p53 class mediator	-9.23928	-7.041	Bax,Cdkn1a,Ddx5,Hnrnpk,Npm1,Mybbp1a,Pml,Rpl26,Rps7,Stk11,Ubb,Pcbp4,Rpl23,Pycard,Rpl11,Aen,Nop2,Bag6,Sesn2,Atad5,E2f2,Rpl5,Atf4,Hyou1,Epha2,Rack1,Mcl1,Msh6,Nfe2l2,Tpt1,Rps3,Ube2k,Pias4,Sfpq,Ppia,Atpif1,Dapk3,Daxx,Fadd,Maz,Zfp13,Dido1,Tnfrsf12a,Pih1d1,Hmgb2,Nanos3,Cdk4,Hspd1,Mybl2,Ncf2,Nodal,Rps29,Rps6,Sfrp4,Tsc22d1,Ube2m,Acin1,Txnip,Rrp1b,Cdc34,Zc3h12a,Eif5a
	Reactome Gene Sets	R-MMU-3700989	Transcriptional Regulation by TP53	-8.43592	-6.265	Bax,Cdk2,Cdkn1a,Csnk2b,Daxx,Npm1,Prdx1,Pml,Rabggtb,Rbbp4,Stk11,Supt5,Ubb,Ubc,Mta2,Banp,Nelfb,Cox20,Cox14,Polr2e,Rraga,Rmi1,Cnot10,Rfc4,Chd4,Brd1,Sesn2,Cnot3,Cnot1,Dna2,Sco2
	GO Biological Processes	GO:0032200	telomere organization	-8.24913	-6.088	Apex1,Hnrnpd,Cct6a,H3f3a,H3f3b,Hsp90ab1,Hsp90aa1,Pml,Gnl3,Hnrnpu,Rif1,Ppp1r10,Nhp2,Hnrnpa2b1,Ptges3,Pnkp,Nat10,Smg1,Parp3,Dna2,Gfer,Cdkn1a,Npm1,Sh2b1,Polg2,Ddx39b,Rfc4,Daxx,H1f3,Ruvbl2,H1f2,Fbxo5,Pih1d1,Sfpq,Shcbp1l,H1f1,Map1s,Atpif1,Bax,Dync1h1,Hap1,Ptbp1,Zfp13,G3bp2,G3bp1,Rps3,Dstn,Pycard,Ooep,Lrsam1,Cnot1,Wasf2
	GO Biological Processes	GO:0006401	RNA catabolic process	-8.07742	-5.929	Apex1,Hnrnpd,Cirbp,Ddx5,Dhx9,Npm1,Pabpc1,Ptbp1,Ybx1,Zfp36,Fxr2,Hnrnpu,Pcbp4,Rbm8a,Dis3,Cnot10,Ythdf2,Etf1,Smg7,Zc3h12a,Tardbp,Cnot3,Smg1,Fus,Cnot1,Nanos3,Dna2,Slirp,Trim71,Bax,Eno1,Gapdh,Galk1,Zbtb7a,Ncf2,Nfe2l2,Eif4g2,Hsp90ab1,Mcl1,Pml,Rps7,Rpl23,Rpl11,Rraga,N4bp1,Bag6,Rpl5,Hsd17b14,Bscl2,Banp
	GO Biological Processes	GO:0006913	nucleocytoplasmic transport	-7.5596	-5.439	Calr,Cdkn1a,Ddx5,Dhx9,Hspa8,Hsp90ab1,Hsp90aa1,Hspa9,Jup,Kpna2,Npm1,Pik3r2,Pml,Ran,Rps15,Srsf3,Nxf1,Hnrnpa2b1,Ddx39b,Txnip,Ranbp17,Ddx39a,Ipo5,Ranbp3,Xpo5,Tnpo2,Zc3h12a,Tardbp,Ddx19b,Eif5a,Thoc6,Zbtb7a,Stk11,Sumo1,Hnrnpu,Banp,Rpl11,Ctdnep1,Sesn2,Hspd1,Romo1,Tomm20,Timm29,Ap4m1,Atpif1,Bax,Cct6a,Cd68,Ruvbl2,Pih1d1,Lrsam1,Plk3,Epha2,Rack1,Hnrnpk,Rab34,Gnl3,Stac2
	GO Biological Processes	GO:1903313	positive regulation of mRNA metabolic process	-7.07911	-4.977	Prdx6,Hnrnpd,Cirbp,Hspa8,Ncl,Pabpc1,Tra2b,Zfp36,Tra2a,Sf3b4,Ythdf2,Zc3h12a,Tardbp,Cnot1,Nanos3,Trim71,Hnrnpk,Srsf5,Slc38a2,Hnrnpll
	GO Biological Processes	GO:0031329	regulation of cellular catabolic process	-6.64549	-4.565	Apex1,Atpif1,Hnrnpd,Bax,Cirbp,Plk3,Dhx9,Eif4g2,Rack1,Hsp90ab1,Hsp90aa1,Zbtb7a,Smad7,Mcl1,Npm1,Pabpc1,Pik3r2,Pml,Ptbp1,Rad23a,Rps7,Stk11,Supt5,Ubb,Sumo1,Ybx1,Zfp36,Fxr2,Hnrnpu,Ube2k,Fzr1,Pcbp4,Rpl23,Pycard,Rpl11,Kat8,Rraga,N4bp1,Csnk1a1,Ythdf2,Tmem259,Bag6,Lrsam1,Zc3h12a,Sesn2,Tardbp,Smg1,Fus,Cnot1,Nanos3,Slirp,Trim71,Rpl5,Ccnf,Daxx,Enc1,Hmg20b,Rps2,Nfe2l2,Ring1,Traf4,Ubc,Ube2m,Rps3,Gnl3,Mkrn1,Gps…
	WikiPathways	WP246	TNF-alpha NF-kB Signaling Pathway	-6.15976	-4.104	Csnk2b,Fadd,Rack1,Hsp90ab1,Hsp90aa1,Kpna2,Mcm7,Pml,Rpl6,Polr1c,Polr1d,Traf4,Sumo1,G3bp2,Rpl8,Rps11,Tab1,Rpl4,Rps13,Nkiras1,Cdc34
	GO Biological Processes	GO:0006457	protein folding	-5.9777	-3.927	Calr,Canx,Cct6a,H2-DMa,Hspa8,Hspd1,Hsp90ab1,Hsp90aa1,Hspa9,Hspe1,Ptges3,P3h1,Dnaja2,Ppil1,Ppil3,Dnajb14,Tbcc,Ahsa1,Ppia
	GO Biological Processes	GO:0010564	regulation of cell cycle process	-5.72589	-3.681	Apex1,Calr,Ccnd1,Ccnf,Cdk2,Cdk4,Cdkn1a,Cirbp,Plk3,Dync1h1,Fgfr2,Ptpn6,Hsp90ab1,Npm1,Mybbp1a,Pml,Rpl26,Sh2b1,Sox15,Racgap1,Tjp3,Hnrnpu,Ppp1r10,Rbm14,Fzr1,Donson,Rpl23,Fbxo5,Anp32b,Ooep,Chmp2a,Sfpq,Kif23,Med25,Nat10,Rcc1,Sde2,Ythdf2,Eml3,Parp3,Atad5,Jade1,Ccdc84,Eif4ebp1,Rad23a,Ddx39b,Nanog,Rps15a,Daxx,Mcm3,Mybl2,Ran,Rps6,Son,Jtb,Nasp,Ncaph2,Ncapd2,Smc4,Ube2s,Kif22,Snx18,Dna2,Trim71,Timeless,Dapk3,…
TBX	Reactome Gene Sets	R-MMU-8866904	Negative regulation of activity of TFAP2 (AP-2) family transcription factors	-5.26828	-0.987	Tfap2b,Wwox,Tfap2d,Chl1,Ppara,Smo,Zfp746
	GO Biological Processes	GO:0014902	myotube differentiation	-4.50476	-0.7	Cflar,Pitx2,Tbx1,Cdon,Bhlhe41,Smo,Wnt7b,Ror2,Tbx20,Aida,Mdga2,Ppara,Lama1,Csmd1,Map3k1,Kif26b,Large1,Fbxw4
	Reactome Gene Sets	R-MMU-112316	Neuronal System	-3.8737	-0.437	Comt,Gad2,Gng4,Gria1,Ncald,Il1rapl2,Kcnk10,Rims1,Abhd6
	GO Biological Processes	GO:0003338	metanephros morphogenesis	-3.57825	-0.272	Wnt7b,Kif26b,Smo,Cflar,Tfap2b
	GO Biological Processes	GO:0071560	cellular response to transforming growth factor beta stimulus	-3.22924	-0.243	Cflar,Ppara,Map3k1,Fut8,Nepn,Wwox,Bhlhe41,Tfap2b,Ror2,Tbx20,Tbx1
	GO Biological Processes	GO:0043506	regulation of JUN kinase activity	-2.99244	-0.219	Wnt7b,Map3k1,Ror2,Aida,Cflar,Ntsr2,Ros1,Tbx1,Map2k6,Cdon
	GO Biological Processes	GO:0048589	developmental growth	-2.91417	-0.219	Cflar,Large1,Ppara,Wnt7b,Tbx20,Nedd4l,Rims1,Socs2,Rab21,Kif26b,Smo,Gng4,Ros1,Ror2,Cdon
	GO Biological Processes	GO:0006904	vesicle docking involved in exocytosis	-2.8909	-0.219	Septin5,Vps45,Rims1
	GO Biological Processes	GO:0048732	gland development	-2.78296	-0.155	Atp7b,Cflar,Lama1,Pitx2,Tbx1,Csmd1,Socs2,Smo
	GO Biological Processes	GO:0009101	glycoprotein biosynthetic process	-2.74871	-0.134	Large1,Hs6st3,Fut8,Galnt2,Alg11,Xxylt1,Ppara,Chst5
	GO Biological Processes	GO:0002011	morphogenesis of an epithelial sheet	-2.53786	-0.055	Lama1,Map3k1,Tbx20
	GO Biological Processes	GO:1905114	cell surface receptor signaling pathway involved in cell-cell signaling	-2.4197	-0.036	Pitx2,Wnt7b,Ror2,Fbxw4,Wwox,Aida,Rims1,Smo,Tfap2b
	GO Biological Processes	GO:0060425	lung morphogenesis	-2.36883	0	Lama1,Pitx2,Wnt7b,Ror2
	GO Biological Processes	GO:0006970	response to osmotic stress	-2.12031	0	Itga2,Nedd4l,Lrrc8d
	GO Biological Processes	GO:0008015	blood circulation	-2.07572	0	Ppara,Map2k6,Ncald,Tbx20,Nedd4l,Immp2l,Trhde
	WikiPathways	WP232	G Protein Signaling Pathways	-2.04012	0	Gng4,Pde1c,Pde7b
	GO Biological Processes	GO:0042594	response to starvation	-2.01556	0	Comt,Ppara,Tbc1d5,Fnip1

## Sheet: CORE | MYC | PAF
Name	-log2_Pvalue(Core)	-log2_Pvalue(Myc)	-log2_Pvalue(PAF)
Plurinetwork: Mechanisms Associated with Pluripotency	-21.1898	/	-9.90244
Embryonic Morphogenesis	-8.15461	/	/
Stem Cell Population Maintenance	-7.85468	/	/
Branching Involved in Mammary Gland Duct Morphogenesis	-7.10984	/	/
Wnt Signaling Pathway and Pluripotency	-7.10241	/	/
Cyclin D Associated Events in G1	-5.77052	/	/
Regulation of Response to DNA Damage Stimulus	-5.46614	/	/
Chromatin Organization	-5.42114	/	/
Transcriptional Regulation by Runx1	-5.36223	/	/
Metabolism of RNA	/	-22.5419	/
PRC2 Methylates Histones and DNA	/	-14.6625	/
Ribonucleoprotein Complex Biogenesis	/	-13.443	/
Translation	/	-13.1918	/
RNA Localization	/	-10.5053	-10.4105
Positive Regulation of Chromosome Organization	/	-9.06038	/
Ribosomal Small Subunit Biogenesis	/	-7.95017	/
Positive Regulation of DNA Metabolic Process	/	-7.67123	/
Regulation of Cell Cycle Process	/	-6.8087	/
Nonsense Mediated Decay (NMD) Independent of The Exon Junction Complex	/	/	-64.5872
mRNA Processing	/	-14.0506	-31.312
Epigenetic Regulation of Gene Expression	/	/	-28.3261
Regulation of Translation	/	/	-19.6549
Ribonucleoprotein Complex Assembly	/	/	-15.6856
Cellular Response to DNA Damage Stimulus	/	/	-10.9351
Translation Factors	/	/	-10.5992
Gene Silencing	/	/	-10.133

## Sheet: PRC | PCGF | TBX
Name	-log2_Pvalue(PRC)	-log2_Pvalue(PCGF)	-log2_Pvalue(TBX)
Pattern Specification Process	-100	/	/
Head Development	-73.3028	/	/
Cell Fate Commitment	-70.7745	/	/
Sensory Organ Development	-58.406	/	/
Tissue Morphogenesis	-50.0379	/	/
Neuron Fate Commitment	-38.0352	/	/
Mesenchyme Development	-34.4715	/	/
Epithelial Cell Differentiation	-32.5305	/	/
Axonogenesis	-31.6461	/	/
Gap Junction	/	-4.85572	/
Calcium Signaling Pathway	/	-3.37326	/
Negative Regulation of Locomotion	/	-2.8985	/
Lamellipodium Assembly	/	-2.72283	/
Regulation of Sodium Ion Transport	/	-2.37713	/
Positive Regulation of Endocytosis	/	-2.37651	/
Synapse Assembly	/	-2.35242	/
Positive Regulation of Binding	/	-2.29024	/
Pancreatic Secretion	/	-2.26634	/
Negative Regulation of Activity of Tfap2 (Ap-2) Family Transcription Factors	/	/	-5.26828
Myotube Differentiation	/	/	-4.50476
Neuronal System	/	/	-3.8737
Metanephros Morphogenesis	/	/	-3.57825
Cellular Response to TGF-Beta Stimulus	/	/	-3.22924
Regulation of Jun Kinase Activity	/	/	-2.99244
Developmental Growth	/	/	-2.91417
Vesicle Docking Involved in Exocytosis	/	/	-2.8909
