# Supplementary material for: A multi-omics integrative analysis based on CRISPR screens re-defines the pluripotency regulatory network in ESCs
Source: Research Square preprint supplement (doi:10.21203/rs.3.rs-951395/v1), 2023-03-13
Supplement: Supplementary file 3 [file Supplementary Data4.xlsx]

## Sheet: Sheet1
Ribosome	Core TFs	Low expression	Non-essential	Top1000	Top100
Rps20	Puf60	Als2cr12	Gm10256	Hsd17b10	Hsd17b10
Rps27	Klf4	Bai3	Egr4	Hmbs	Hmbs
Rps23	Stat3	Sntg1	Tas2r130	Oxsr1	Oxsr1
Rpl39	Trim28	Dpp10	Gm15319	Pkmyt1	Pkmyt1
Rpl5	Nanog	Serpinb3b	Pdcl2	Pnpt1	Pnpt1
Rpl35a	Tbx3	Cd247	Rbmy	Vrk1	Vrk1
Rpl37a	Esrrb	Capn8	Psg16	Eefsec	Eefsec
Rpl37	Myc	Cpa6	Tcp10c	Hist1h2ae	Hist1h2ae
Rpl32	Pou5f1	Khdrbs2	Gm10352	Ndor1	Ndor1
Rpl23a	Nr0b1	Tmem182	Dcaf8l	Hist1h2an	Hist1h2an
Rps18	Wdr5	Plcl1	Pramef25	Rabggta	Rabggta
Rps28	Rif1	Dnahc7a	Gm13101	Coa7	Coa7
Rps19	Zfp281	Pard3b	Magea6	Prpf19	Prpf19
Rps28	Ep300	Cd28	Adad1	Fdps	Fdps
Rps7	Foxd3	Abca12	Ddi1	Nsf	Nsf
Rps6	Sox2	Erbb4	Pramef17	Rad9a	Rad9a
Rpl28	Zfx	St8sia4	Pramel4	Atp5a1	Atp5a1
Rpl31		Cntnap5b	Gm13102	Rexo2	Rexo2
Rps14		Nckap5	Oog3	Vps29	Vps29
Rps24		Astn1	Magea3	Mettl14	Mettl14
Rps23		Tnr	Magea8	Ctu1	Ctu1
Rps27		Rgs7	Magea1	Mtg2	Mtg2
Rps17		Esrrg	Magea2	Nubp2	Nubp2
Rpl38		Xkr4	Magea5	Ppp2r1a	Ppp2r1a
Rps7		Rp1	Cacng2	Zpr1	Zpr1
Rpl7l1		St18	Trhr	Cpsf3	Cpsf3
Rps2		Ppp1r42	Olfr362	Elp5	Elp5
Rps3a1		Kcnb2	Afm	Cars2	Cars2
Rps15a		Gm106	Gm21119	Ndufaf7	Ndufaf7
Rpl13		Tfap2d	Kcng4	Dohh	Dohh
Rpl18a		Pkhd1	Ceacam3	Slc25a37	Slc25a37
Rpl24		Kcnq5	Dusp21	Glrx5	Glrx5
Rpl3		Col9a1	Npffr1	Mrpl15	Mrpl15
Rpl10a		Col19a1	Gdf2	Mrpl52	Mrpl52
Rpl10		4931408C20Rik	Tas2r120	Uba1	Uba1
Rpl12		Gm597	Tas2r136	Wdr82	Wdr82
Rps21		Lyg1	Bmp15	Gpn2	Gpn2
Rps16		Npas2	Oog2	Nubpl	Nubpl
Rpl5		Il1rl1	C87977	Prmt5	Prmt5
Rpl12		Slc9a2	AY761185	Fam96b	Fam96b
Rpl34		Tmeff2	Defa21	Sepsecs	Sepsecs
Rpl29		Aox3	Defa23	Ept1	Ept1
Rps24		Cdk15	Defa35	Tbca	Tbca
Rpl14		Dytn	Defa25	Golt1b	Golt1b
Rpl35		Pth2r	Defa38	Hscb	Hscb
Rpl7l1		Unc80	Defa30	Ppp2ca	Ppp2ca
Rpl39		Myl1	Defa22	Cltc	Cltc
Rps18		Ikzf2	Defa31	Fen1	Fen1
Rpl31		Vwc2l	Defa41	Sco2	Sco2
Rpl37		Ankar	Cyp7a1	Vhl	Vhl
Rps10		Ccdc108	Psg29	Ipo13	Ipo13
Rpl18a		Wnt10a	Olfr19	Gtf3c1	Gtf3c1
Rpl29		Pax3	Adam18	Rfwd2	Rfwd2
Rps11		Sgpp2	Olfr368	Ndufa8	Ndufa8
Rps6		9430031J16Rik	Prdm14	Dph5	Dph5
Rps26		Col4a3	Il21	Ppp2r4	Ppp2r4
Rpl30		Col4a4	Gpr139	Bccip	Bccip
Rpl28		Sphkap	Gm29289	Chmp6	Chmp6
Rps29		Sp100	Gm21677	Thoc3	Thoc3
Rps19bp1		Alpi	Gm21693	Kat8	Kat8
Rps13		Ugt1a1	Gm21708	Dr1	Dr1
Rpl27		Ngef	Gm21704	Ppil2	Ppil2
Rpl26		Spp2	Rbp3	Nrbp1	Nrbp1
Rps15		Asb18	Tas2r121	Ddx55	Ddx55
Rps26		Col6a3	Tas2r124	Txn1	Txn1
Rpl12		Twist2	Tas2r102	Wdr73	Wdr73
Rpl36a		Pdcd1	Vhl	Skiv2l	Skiv2l
Rpl7l1		Slco6c1	Tas2r131	Mios	Mios
Rpl36a		Slco6b1	A26c2	Cmtr1	Cmtr1
Rpl19		Slco6d1	Fscb	Atp6v1a	Atp6v1a
Rpl13		Cdh20	Gm30083	Cluh	Cluh
Rpl7		Bcl2	Gprc6a	Mrpl36	Mrpl36
Rpl39		Serpinb10	Iqcf1	Mcm4	Mcm4
Rps3		Cdh7	Umod	Snrnp35	Snrnp35
Rps19		Cdh19	Tas2r135	Fancl	Fancl
Rps15a		Cntnap5a	Ifnk	Tfb1m	Tfb1m
Rps13		Lypd1	Gm3376	Cenpm	Cenpm
Rps20		Gpr39	Olfr17	Tufm	Tufm
Rps12		Acmsd	Antxrl	Ikbkap	Ikbkap
Rps16		Thsd7b	Slc39a12	Ndufa3	Ndufa3
Rps25		Faim3	Nox3	Exoc7	Exoc7
Rps5		Ctse	Slc17a2	Atp6v1b2	Atp6v1b2
Rpl10		Syt2	Apoa4	L3mbtl2	L3mbtl2
Rps3		Igfn1	Tas2r126	Riok1	Riok1
Rps29		Ptprc	Kir3dl1	Elp3	Elp3
Rpl7a		Crb1	Kir3dl2	Slc25a26	Slc25a26
Rpl19		B3galt2	Vpreb1	Tyms	Tyms
Rpl10		Rgs13	Olfr715b	Rtn4ip1	Rtn4ip1
Rpl36a		Fam5c	Olfr715	Pdrg1	Pdrg1
Rps3a1		Prg4	Pde6h	Pak1ip1	Pak1ip1
Rpl21		Pdc	Olfr713	Eif2s3x	Eif2s3x
Rps23		Glt25d2	Olfr714	Ddx49	Ddx49
Rps9		Cacna1e	Pramel5	Banf1	Banf1
Rpl8		Fam163a	Gm13128	Sbds	Sbds
Rps21		Pappa2	Gm13119	Mrpl17	Mrpl17
Rpl29		4930523C07Rik	Pramef20	Eif6	Eif6
Rpl30		Serpinc1	Pramef12	Chchd5	Chchd5
Rps17		Dnm3	Rhox10	Isca2	Isca2
Rps29		Fmo3	Hhla1	Rtel1	Rtel1
Rps10		Selp	Ceacam5	Rabggtb	Rabggtb
Rpl18		Gm4846	Ceacam14	Hnrnpu
Rpl8		Nr1i3	Gm5155	Timm17a
Rps16		Olfr426	Gabra6	Xrcc3
Rpl37a		Ifi202b	Mmd2	Tmem11
Rpl10		Grem2	Olfr716	Timm10
Rpl12		Pld5	Rfpl4b	Isca1
Rps28		Gm16432	Cela2a	Smc6
Rpl36a		Kif26b	Defa40	Pgrmc2
Rpl37a		Itpkb	Defa3	Urod
Rpl14		Cnih3	Defa5	Atp1a1
Rpl15		Tgfb2	Defa27	Hist1h2ao
Rpl9		Spata17	Defa29	Dut
Rps9		Ush2a	Defa2	Timm50
Rps12		Kcnk2	Defa33	Nars2
Rpl36al		Cr2	Defa36	Gm561
Rpl23		Cd46	Defa42	Elp6
Rps25		Sox17	Defa20	Dpagt1
Rps27a		Npbwr1	Defa32	Mak16
Rpl10a		3110035E14Rik	Defa37	Peo1
Rpl31		Xkr9	Defa28	Smc5
Rpl11		4930444P10Rik	Defa43	Paics
Rps26		Gdap1	Defa26	Txnrd2
Rpl18a		Pi15	Defa17	Sars2
Rpl11		Crisp4	Defa34	Scap
Rps17		Defb41	Defa39	G6pdx
Rpl23		Defb18	Dgkk	Brap
Rpl35a		Tfap2b	Mageb18	Prmt1
Rpl5		Il17a	Rfx6	Pabpn1
Rpl27a		Khdc1c	Hdgfl1	Ddx5
Rpl5		Khdc1a	Pdilt	Alg13
Rps9		Khdc1b	Enthd1	Clpp
Rps3		4933415F23Rik	Lim2	Cdc37
Rpl38		B3gat2	Olfr2	Pou5f1
Rps24		Gm20172	Olfr221	Rtcb
Rpl23		4930521A18Rik	Oc90	Ptp4a2
Rps14		Lgsn	Gabra1	Mecr
Rpl23a		Gm9839	B020004J07Rik	Rbbp4
Rps8		Gm5415	C130073F10Rik	Dars
Rpl18		Cfc1	Gm12800	Pet117
Rps2		Prss39	Gm12794	Dcaf7
Rpl8		Prss40	Gm12790	Lamtor4
Rps2		Fam123c	Gm12789	Nup43
Rps5		Lyg2	Gm16427	Nr0b1
Rpl11		Nms	C87414	Stk11
Rpl4		Gm3646	Pramel1	Hars
Rpl14		Il18r1	Gm7792	Mocs3
Rpl19		Il18rap	Gm16429	Cops3
Rps27		Slc9a4	Pramef8	Telo2
Rps27l		Pou3f3	BC061212	Polrmt
Rps25		Gpr45	Gm6351	Dnajc2
Rpl24		1500015O10Rik	Oog4	Mettl17
Rpl8		A530098C11Rik	Gm3106	Letm1
Rpl14		4832428D23Rik	A430089I19Rik	Ndnl2
Rpl27		Col3a1	Gm6502	Smc2
Rps15		Gm3852	Gm13043	Skp1a
Rpl17		Sdpr	AA792892	Ykt6
Rpl23a		Mstn	Gm7682	Eif1ad
Rpl13		Rftn2	Gm3139	Lsm8
Rps2		Hsfy2	Gm3147	Slc25a28
Rpl22l1		Aox4	Gm6509	Grwd1
Rpl24		Aox3l1	Gm6205	Pyroxd1
Rpl38		Ctla4	BC080695	Atad3a
Rpl10a		Icos	Gm13040	Ipo7
Rpl28		Gpr1	Gm13057	Max
Rps11		4933402D24Rik	Insm2	Nelfb
Rpl30		Crygb	Prss38	Tefm
Rpl6		Crygd	Gkn2	Hspa4
Rpl21		Crygc	Cela3a	Crcp
Rpl29		Crygf	Cela3b	Med26
Rps18		Tnp1	Otp	Iars
Rpl37		Fev	Figla	Cdipt
Rpl9		Cryba2	Fgf3	Rplp0
Rps14		Ihh	Asb17	Tfrc
Rpl3		Slc23a3	Mmp27	Deb1
Rps24		Resp18	Adam30	Fam98b
Rps16		Accn4	Nms	Trappc5
Rpl26		Tmem198	Gpr101	Dph6
Rps21		Kcne4	Tbpl2	Mre11a
Rpl37a		Scg2	Ceacam11	Med20
Rpl7a		Fam124b	Ceacam13	Cpsf1
Rpl3		Irs1	Ceacam12	Rad50
Rps27		Tm4sf20	Nlrp4e	Psmd14
Rps11		Wdr69	Nlrp4c	Mrpl55
Rps13		Spata3	C8b	Pars2
Rps6		Gpr55	Slc22a19	Erh
Rpl27a		Htr2b	Slc22a26	Ppox
Rpl21		1700019O17Rik	Slc22a27	Haus4
Rpl28		Akp3	Slc22a28	Uxt
Rps7		Chrng	Slc22a29	Nsun3
Rpl36		3110079O15Rik	Slc22a30	Dph2
Rpl27		Kcnj13	Kcnk16	Pitpnb
Rps8		Neu2	Olfr331	Ncbp1
Rpl4		Sag	Olfr330	Pgs1
Rps3a1		Heatr7b1	Olfr329	Nubp1
Rps12		Trpm8	Taar5	Hdac1
Rpl30		Glrp1	Il1f5	Itpa
Rpl35a		Prlh	Olfr469	Mrpl53
Rpl32		Mlph	Olfr470	Lrpprc
Rps10		Ramp1	Olfr478	Vdac1
Rpl18		Klhl30	Olfr482	Rnpc3
Rps15a		Espnl	Olfr483	Atpaf2
Rpl32		Olfr1411	Olfr484	Cpsf2
Rps8		Olfr1414	Olfr485	Nars
Rpl35		Olfr1416	Olfr486	Sf3b4
Rpl19		Olfr1412	Olfr487	Racgap1
Rpl36		Olfr1413	Olfr488	Dhx33
Rpl6		Olfr1415	Olfr490	Ndufs2
Rpl36		Olfr1410	Olfr492	Mrps16
Rpl7a		Olfr12	Olfr493	Nedd8
Rps5		Otos	Olfr494	Med12
Rpl17		Gpr35	Olfr495	Trmt61a
Rpl27a		Aqp12	Olfr497	Dbr1
Rpl6		2310007B03Rik	Olfr498	Yars
Rpl6		Agxt	Taar1	Ppa2
Rpl7a		Gal3st2	Barhl1	Smarcc1
Rpl18		Neu4	Dsg4	Triap1
Rps10		Gm9994	Msgn1	Srp72
Rpl7		Gm6086	Defb13	Mcat
Rpl11		Serpinb5	Bmp10	Fanca
Rps9		Serpinb12	Olfr480	Atp6v0c
Rps11		Serpinb13	Mrgpra6	Smarce1
Rpl35		Serpinb3d	Mrgpra9	Clasrp
Rpl7l1		Serpinb3a	Mrgpra1	Cenpa
Rps26		Serpinb3c	Mrgpra2a	Mtg1
Rpl4		Serpinb11	Mrgpra2b	Cct7
Rpl24		Serpinb2	Mrgpra3	Eif3f
Rpl26		Serpinb7	Mrgpra4	Rfc2
Rpl15		Serpinb8	Mrgprx1	D2Wsu81e
Rps3		Gm101	Mrgprb5	Orc5
Rpl21		Sctr	Mrgprb4	Aars2
Rpl41		C1ql2	Mrgprb8	Clp1
Rpl34		Marco	Mrgprb1	Gemin6
Rps18		En1	Mrgprx2	Polr3b
Rpl41		Htr5b	Mrgprb2	Dph3
Rps5		Ysk4	Mrgprb3	Qrsl1
Rpl7		Lct	Fndc7	Iscu
Rpl27a		C4bp	Crx	Glrx3
Rpl22l1		Fcamr	Lhx5	Ascc3
Rps8		Pigr	Fgf4	Hspa14
Rpl32		Il20	Cdx4	Rnf40
Rpl17		Il24	Taar8a	Ndufa2
Rps13		Il19	Taar8b	Rev1
Rps6		Il10	Taar8c	Ctcf
Rpl13		Avpr1b	Gm9495	Dcaf13
Rpl10a		Slc26a9	Frg2f1	Tomm22
Rps15		5430435G22Rik	Ffar1	Vps25
Rps21		Klhdc8a	Nlrp5	Gtf2b
Rps25		Kiss1	Mmp20	Ddx3x
Rps17		Ren1	Taar2	Nfs1
Rpl15		Golt1a	Defb15	Vps72
Rpl9		Optc	Defb34	Coq6
Rpl38		Prelp	S100g	Zfp281
Rpl7		Fmod	Fndc9	Ruvbl2
Rpl36		Adora1	Olfr1423	Ppp2r3c
Rps27a		Myog	Gpr26	Esf1
Rps27a		Gpr37l1	Zic3	Actr3
Rps15a		Pkp1	Defa24	Gins2
Rpl35		Gpr25	Olfr1424	Cenpn
Rpl26		Atp6v1g3	Olfr1425	Aar2
Rpl23a		Lhx9	Olfr1426	Hspa9
Rps19		F13b	Slc2a7	Tmem258
Rps27a		Cfhr1	Trim43a	Igbp1
Rpl35a		Cfh	Trim43c	Mms22l
Rps15		Rgs1	Trim43b	Trmu
Rpl37		Rgs18	Cabp2	2021-03-05
		Apobec4	F9	Fdxr
		Rgs8	4933402N03Rik	Alg1
		Rgsl1	Prlh	Tars
		5830403L16Rik	Cabp5	Ndufaf6
		Teddm1	Taar9	Umps
		Gm5531	Mtnr1b	Zw10
		Zfp648	Guca2a	Snrnp40
		Mr1	Spata21	Snrpc
		Lhx4	Rnase13	Ciao1
		Nphs2	Il1f8	Mrpl43
		Angptl1	Slc2a2	Gtpbp3
		Sec16b	Rbmxl2	Arf1
		Tnn	Olfr453	Tsfm
		Gpr52	Olfr38	Mars2
		4930469G21Rik	Olfr452	Mrpl12
		Tnfsf4	Fut9	Trub2
		Tnfsf18	Trpm1	Opa1
		Fasl	Ccdc155	Dlst
		4930558K02Rik	Il1f6	Ppp4c
		Myoc	Defb14	Pfdn5
		7420461P10Rik	Fezf1	Orc6
		Fmo4	C8a	Il6st
		Fmo2	Slc13a1	Uqcrc1
		Fmo1	Ndst4	Cmip
		Fmo6	Gm4064	Rbx1
		4921528O07Rik	Crygb	Naa15
		Prrx1	Olfr1497	Mcm2
		Mettl11b	Samd7	Ube2m
		Sell	Tex28	Hdac3
		Sele	Esx1	Tubb5
		Dpt	Fezf2	Cct2
		Xcl1	Six6	Traip
		Tbx19	Ssxa1	Ppp6c
		Adcy10	Olfr328	Mfn2
		Gm4847	Olfr224	Dhx29
		Fmo9	Olfr325	Mrpl27
		Lrrc52	Tyr	Eaf1
		Rgs4	Gpx6	Dimt1
		Rgs5	Il1f10	Adat3
		1700084C01Rik	Olfr320	Pdss1
		Sh2d1b1	Olfr319	Trappc1
		Sh2d1b2	Olfr318	Pold2
		1700015E13Rik	Olfr316	Ssbp1
		Fcrla	Mbd3l2	Mat2a
		Fcrlb	Krt73	Rad51d
		Fcgr4	Grk1	Kdm8
		Fcgr3	Pnpla5	Lars
		Pcp4l1	Slc22a6	Gfm1
		Cd244	Brdt	Tcp1
		Itln1	Khdc3	Mtx2
		Ly9	Gm20509	Aasdhppt
		Cd48	Gm3183	U2af1
		Slamf7	Gm13083	Mbtps1
		Slamf1	Gm13088	Actb
		Slamf6	Gm6367	Dnajc8
		Nhlh1	Gm7942	Rad51
		Kcnj9	Gm13089	Naca
		Slamf8	Gm13078	Apex1
		Fcrl6	Gm13023	Lig3
		Dusp23	Gm13084	Psmb6
		Crp	Gm13103	Hjurp
		Apcs	Pramef6	Birc5
		Olfr16	C87499	Ten1
		Olfr1408	Gm16513	Sf1
		Gm11062	Gm10424	Setd5
		Olfr1404	Gm3259	Rsl24d1
		Olfr418-ps1	D5Ertd577e	Pcid2
		Olfr1406	Gm3286	Med7
		Fcer1a	Gm7971	Gtf2a1
		Olfr218	Ifna9	Gnb2l1
		Darc	Ifna15	Mrps21
		BC094916	Ifna14	Sox2
		Pydc4	Ifna12	Eif3k
		Pyhin1	Ifna13	Sde2
		Pydc3	Ifna16	Krtap6-5
		AI607873	Ifna2	Dnajc11
		Ifi204	Ifnab	Ell
		Mndal	Ifna7	Rcc1
		Ifi203	Ifna11	Fars2
		Mnda	Ifna6	Kdsr
		Olfr429	Ifna5	Dap3
		Olfr430	Ifna4	Minos1
		Olfr432	Ifna1	Mrpl44
		Olfr433	Duxbl1	Ints3
		Ifi205	Duxbl2	Mcm7
		Olfr421-ps1	Olfr1496	Tnpo3
		Olfr424	Olfr650-ps1	Sap130
		Olfr420	Trim67	Pelo
		Olfr231	Nobox	Polr3f
		1810030J14Rik	Krt2	Eif3d
		Olfr419	Krt75	Ptar1
		Olfr248	Slc22a8	Qars
		Olfr220	Klk9	Ddx10
		Olfr417	Actrt1	Pabpc1
		Olfr414	Gpr45	Napa
		Kmo	Zcchc13	Nup85
		1700016C15Rik	Slitrk1	Mrto4
		6330403A02Rik	Tmem174	Med10
		Ccdc121	Ins1	Gpi1
		Vmn1r1	Prss58	Sdha
		4922505E12Rik	Gcm2	Hist2h3c1
		Hlx	Serpina7	Mfn1
		Mosc1	Il12b	Slc25a51
		Prox1	Slc22a12	Sf3a2
		Fam71a	Rpe65	Actr2
		Rd3	Trim42	Ncbp2
		Traf3ip3	Shcbp1l	Prpf38a
		Hsd11b1	Gm7073	Hist1h4h
		Camk1g	Vmn1r233	Eif2b1
		Lrp1b	Vmn1r234	Gmppb
		Ccdc148	Vmn1r235	Snf8
		4930525F21Rik	Vmn1r236	Tbcd
		Cacnb2	Vmn1r4	Bop1
		4931423N10Rik	Vmn1r5	Ercc4
		Ttll11	Vmn1r6	Tardbp
		Arhgap15	Vmn1r7	Ssu72
		Galnt13	Vmn1r8	Arpc4
		Cacnb4	Vmn1r9	Kif2c
		Kcnh7	Vmn1r10	Tpt1
		Myo3b	Vmn1r11	Eif3a
		Pde1a	Vmn1r12	Coq5
		Tmc2	Vmn1r13	Pola2
		Sptlc3	Vmn1r14	Kidins220
		Bpifb9b	Vmn1r15	Snapc1
		Ptprt	Vmn1r16	Hist1h3f
		Gm14288	Vmn1r17	Lias
		0610010B08Rik	Vmn1r18	Tceb2
		Olah	Vmn1r19	Tamm41
		Itih5	Vmn1r20	Ncoa3
		Prkcq	Vmn1r21	Pcna
		Armc3	Vmn1r22	Cdk7
		4921504E06Rik	Vmn1r23	Gosr2
		Gpr158	Vmn1r24	Rars2
		Gad2	Vmn1r25	Thap11
		Myo3a	Vmn1r26	Pop4
		Apbb1ip	Vmn1r27	Spop
		Nxph2	Vmn1r28	Aldoa
		Ntng2	Vmn1r29	Psmg3
		Lmx1b	Vmn1r30	Rfc5
		1700019L03Rik	Vmn1r31	Jmjd6
		Hc	Ifnb1	Lztr1
		Kynu	4933402E13Rik	Arpc2
		Lypd6b	3830417A13Rik	Top2a
		Acvr1c	Slco1b2	Wdr12
		Itgb6	Slc25a31	Cwc22
		Pla2r1	Spata16	Srsf1
		Fap	Lct	Dhfr
		Slc4a10	Ubqln3	Anapc1
		Fign	Prg3	Wdr70
		Scn2a1	Zg16	Lsm11
		Scn1a	Nlrp4b	Ppih
		Scn7a	Nlrp4f	Tmem126b
		4932414N04Rik	Psg18	Mrpl39
		Hoxd3	Psg28	Ilf2
		Pde11a	Psg26	Lsm2
		Gm14461	Psg25	Atl2
		Ppp1r1c	Psg27	Pdcd11
		Itga4	Psg21	Dbf4
		Zfp804a	Psg23	Eef2
		4833423E24Rik	Ceacam2	Dnaaf5
		Lrrc4c	Ceacam1	Nol10
		Slc1a2	Psg20	Zbtb8os
		Elf5	Psg22	Nxt1
		D430041D05Rik	Psg19	Ddx42
		0610012H03Rik	Psg17	Abce1
		Disp2	Ceacam15	Rnaseh2a
		Epb4.2	Ceacam9	Anapc11
		Slc12a1	Otop1	Armc7
		Slc24a5	Fam71b	Sin3a
		Atp8b4	Mbd3l1	Mms19
		Hao1	Olfr270	Dhdds
		Sel1l2	Nlrp9b	Mto1
		Pcsk2	Tas2r118	Acad9
		Slc24a3	Gpr152	Acsl4
		Pax1	Aicda	Gatb
		Scrt2	Insrr	Gfm2
		Defb36	Clec4n	Ndufc1
		Bpifb3	Cyp26c1	Tada1
		Ghrh	Cngb3	Ercc2
		Jph2	Zfp804b	Lsm7
		Tox2	Pgk2	Tmem70
		Rbpjl	Atp4b	Mrps2
		Wfdc11	Krt84	Gmps
		Svs4	Fabp2	Prpf38b
		Eya2	Lrit1	Rbm22
		Slc13a3	Krt76	Ndufb9
		Tshz2	Slc10a2	Hnrnpk
		Dok5	Apobec1	Exosc10
		Cass4	Pou3f4	Parp1
		Edn3	Mep1b	Dctn5
		Gm14391	Insl6	Ube2n
		Myt1	Lrit2	Atr
		Meig1	Bsnd	Utp15
		Ucma	Uroc1	Ddx54
		Gata3	Atoh1	Arih1
		Itih2	Nyx	Dnajc15
		Il15ra	Galr3	Pih1d1
		Il2ra	Gpr119	Rictor
		C1ql3	Tcp10a	Vars2
		Tmem236	Ppp3r2	Chek1
		Slc39a12	1700028K03Rik	Rae1
		H2afb1	Zfp78	Narfl
		BC061194	Art1	Mdm4
		Ptf1a	Grm4	Bub3
		Tbpl2	Tpte	Pole3
		Hnmt	Opalin	Nle1
		Il1f8	Gm15262	Pgam1
		Il1f6	Il31	Cirh1a
		Il1f10	Olfr167	Nup88
		Il1f5	Olfr31	Mrps27
		Il1rn	Olfr1369-ps1	Upf1
		Noxa1	Olfr263	Cops4
		Entpd8	Mrgprd	Pgk1
		Lrrc26	Olfr314	Mdn1
		E130003G02Rik	Tsga13	Xrcc6
		Tmem210	Krt77	Tbcc
		Fut7	Krt71	Emg1
		Clic3	Klk12	Txnl4b
		Lcn12	Spaca5	Rpl10
		Lcn13	Gm7697	Rfwd3
		Lcn5	4930467E23Rik	Mrps18b
		Lcn8	Gm31371	Wdr18
		Fcna	Olfr501-ps1	Rpl12
		Lcn10	Olfr502	Pitrm1
		4921530D09Rik	Olfr506	Hmgcs1
		Lcn6	Olfr507	Tubg1
		Lcn11	Olfr510	Rpl36a
		Lcn3	Opn1mw	Gtf2e2
		Lcn14	Fmr1nb	Ddx28
		Lcn9	Pax4	Dynlrb1
		Glt6d1	Olfr504	Prdm10
		Sohlh1	Nkx2-1	Pwp1
		Lhx3	Mas1	Dnaja3
		4932418E24Rik	Tmprss15	Uba2
		Lcn4	Cer1	Ppp6r3
		Adamts13	Olfr508	Snrnp25
		Gm711	Glra2	Cog4
		Tmem8c	Grm6	Cox15
		Adamtsl2	Rs1	Psma1
		Dbh	Sec14l3	Ran
		Sardh	Insl5	Mrpl9
		Fcnb	Cdcp2	Eef1a1
		Cel	Pkd1l3	Sec61a1
		Gfi1b	Olfr828	Psmd2
		Barhl1	Olfr830	Dis3
		Gm13547	Olfr835	Fip1l1
		Cstad	Olfr836	Smc3
		Prdm12	Olfr837	Ddx47
		Fibcd1	Olfr839-ps1	Pigu
		Qrfp	Olfr844	Polr2a
		Lamc3	Olfr845	Rif1
		Lcn2	Olfr846	Cox7b
		6330409D20Rik	Olfr847	Exosc3
		4930568D16Rik	Olfr855	Cox10
		4930402F06Rik	Tbl1x	Polr2j
		Olfr339	Gja10	Ufd1l
		Olfr338	Cnbd1	Pdcl3
		Olfr341	Cylc2	Ndufs3
		Olfr342	Grm5	Cds2
		Olfr344	Cd200r1	Setdb1
		Olfr340	Cd200r4	Psma6
		Olfr345	Cd200r2	Ppp1r2
		Olfr346	Npsr1	Yeats4
		Olfr347	Olfr273	Supt16
		Olfr50	Krt82	Trmt112
		Olfr348	Htr1a	Smarca4
		Olfr3	Kcnv1	Mrpl2
		Olfr356	Spaca1	Mrpl14
		Olfr350	Mfrp	Ints8
		Olfr355	Foxr1	Dnm1l
		Olfr351	Il22	Dolk
		Olfr353	Iltifb	Ubtf
		Olfr354	Actl9	Eral1
		Olfr352	Gm11437	Arfrp1
		Olfr357	Olfr685	Lig4
		Olfr360	Gsc2	Stip1
		Olfr361	Krtap13-1	Vwa9
		Olfr358	Asic5	Dhps
		Olfr362	Pou4f2	Srp19
		Olfr365	Gml	Phax
		Olfr366	Gml2	Bap1
		Olfr368	Olfr552	Elp2
		Olfr367-ps	Panx3	Fau
		Gpr21	Hsfy2	Ccdc137
		Lhx2	Bpifc	Psma5
		Nr5a1	Gm3250	Cxxc1
		Wdr38	Gm3238	Eif5
		Gm13476	Gm10318	Dkc1
		Tas2r134	Gm10272	Snrpa1
		Galnt5	Gm9639	Iba57
		Ermn	Krtap10-10	Rrm1
		Cytip	Gm49918	Fxn
		Upp2	Gm10142	Pmpcb
		Dapl1	Gm36176	Mrpl57
		Tbr1	Gm9508	Ndufs7
		Gcg	Gm19402	Coa5
		Ifih1	Gm3233	Eif3c
		Slc38a11	Krtap12-1	Rpusd4
		Gm1322	Gm18596	Lsm12
		Xirp2	Gm10024	Cnot3
		4933409G03Rik	Gm9507	Mrps25
		Abcb11	Gm7137	Brf2
		Dhrs9	Gm9736	Aars
		Kbtbd10	Gm19668	Ndufa1
		Sp5	Gm3285	Tiprl
		4933404M02Rik	Krtap10-4	Ppa1
		Dlx2	Gm10100	Vps11
		Dlx1	Gm7138	Polr3h
		Sp9	Cyp4a30b	Polr3k
		Chrna1	Cyp4a10	Btf3
		Hoxd9	Cyp4a31	Rprd1b
		Hoxd10	Cyp4a32	Uros
		Hoxd4	Olfr568	Abcb7
		Evx2	Cst9	Ddx18
		Hoxd12	Cstdc2	Srsf3
		Hoxd11	Sppl2c	Slc25a19
		Dfnb59	Lyzl1	Ccdc94
		Prdx6b	Prss55	Cnot10
		Frzb	Cyp4f17	Polr1d
		Zswim2	Cyp4f16	Incenp
		Calcrl	Cyp4f37	Prpf6
		Ypel4	Cyp4f13	Gpn1
		Rtn4rl2	Abcg8	Timmdc1
		Prg3	Olfr152	Nacc1
		Prg2	Actl7a	Rpl5
		Aplnr	Gm7978	Ppie
		Lrrc55	Gm7982	Tut1
		Olfr987	E330014E10Rik	Polr3a
		Olfr988	Pramel6	Polr2i
		Olfr992	Oog1	Sfswap
		Olfr993	Pramel7	Timm44
		Olfr995	Gm2042	Thoc6
		Olfr994	Gm10436	Orc3
		Olfr996	Krt78	Rrs1
		Olfr998	Lhfpl5	Ddb1
		Olfr1000	Trim40	Stoml2
		Olfr1002	Piwil1	2810006K23Rik
		Olfr1009	Serpina12	Wdr77
		Olfr1008	B3gnt6	Alyref
		Olfr1006	Lalba	Rnaseh2b
		Olfr154	Olfr1022	Nop14
		Olfr1013	Olfr1023	Zcchc9
		Olfr1022	Mbl2	Txnl4a
		Olfr1015	Mepe	Wdr1
		Olfr1018	Gsta3	Wdr36
		Olfr1020	Krt26	Slc30a9
		Olfr1014	Rtp1	Fastkd1
		Olfr1010	Gm648	Magoh
		Olfr1019	Slc6a5	Lsm10
		Olfr1012	Ccdc172	Arcn1
		Olfr1016	Tmprss11f	Rps4x
		Olfr1028	Retnlb	Urb1
		Olfr1023	Retnla	Dync1i2
		Olfr1026	Retnlg	Pi4kb
		Olfr1032	Lgals9	Pfdn6
		Olfr1030	Dspp	Wdr3
		Olfr1029	Sox14	Pam16
		Olfr1031	Gpr151	Eif2b2
		Olfr1024	Amelx	Rbpms
		Olfr1033	Hoxb1	Rfc4
		Olfr1038-ps	Spaca7	Dna2
		Olfr1036	Lyzl6	Eif3i
		Olfr1039	Csn3	Alg11
		Olfr1037	Rnase9	Rrp7a
		Olfr1034	Cnpy1	Snapc5
		Olfr1042	Olfr557	Cct3
		Olfr1047	Efcab3	Atp6v1g1
		Olfr52	Pdyn	Gtf2f1
		Olfr1046	Krt9	Trit1
		Olfr1044	Mmp21	Hnrnpf
		Olfr1043	Scn10a	Pigk
		Olfr1040	Tex101	Emc1
		Olfr1049	Trpv5	Cul3
		Olfr1048	Kcnk18	Nelfcd
		Olfr1045	Aqp12	Kat5
		Olfr1053	Alx3	Fam208a
		Olfr1052	Defb36	Ndufa6
		Olfr1056	Prlhr	Gnb1l
		Olfr1058	Cckar	Snupn
		Olfr1057	Fgf6	Senp6
		Olfr1054	Ctrb1	Lrr1
		Olfr1055	Tmprss12	Smarcad1
		Olfr1051	Olfr554	Slc35b1
		Olfr1062	Slc7a13	Psmc5
		Olfr1066	Pnliprp2	Abhd11
		Olfr1065	Olfr935	Srrd
		Olfr1061	Olfr146	1110004E09Rik
		Olfr228	Olfr936	Sf3a3
		Olfr1076	Olfr937	Kntc1
		Olfr1085	Olfr27	Ogdh
		Olfr1080	Olfr943	Oxsm
		Olfr1079	Olfr944	Rplp2
		Olfr1084	Olfr1537	Rpl8
		Olfr1082	Olfr945	Coq2
		Olfr1086	Olfr948	Atp5h
		Olfr1090	Olfr951	Wdr75
		Olfr1087	Olfr954	Ndufs8
		Olfr1093	Olfr44	Txn2
		Olfr1089	Neurod6	Gfer
		Olfr141	Otud6a	2310003H01Rik
		Olfr1098	Cst8	Ndufs1
		Olfr1097	Ddx4	Ppan
		Olfr1094	Aipl1	Cct4
		Olfr1095	Dtx2	Krr1
		Olfr1099	Lipm	Cox18
		Olfr1104	Rp1	Urm1
		Olfr1106	Otor	Ilf3
		Olfr1100	Zp2	Rpl14
		Olfr1101	Defb22	Nadk2
		Olfr1105	Tas1r2	Nifk
		Olfr1102	Glt6d1	Zfc3h1
		Olfr1110	Cdx2	Trmt5
		Olfr259	Gpr52	Huwe1
		Olfr1109	Olfr69	Psmc1
		Olfr1107	Olfr68	Lamtor3
		Olfr1111	Pglyrp3	Nanog
		Olfr1113	Ms4a10	Fam50a
		Olfr1112	Opn5	Pfn1
		Olfr1115	Serpina9	Cdc16
		Olfr1118	Actl7b	Gtf2e1
		Olfr1116-ps	Galntl5	Smg1
		Olfr1121	Tmem207	Atp5b
		Olfr1120	G6pc	Ftsj3
		Olfr1124	Tph2	Ddx23
		Olfr1122	Olfr401	Lamtor1
		Olfr1123	Olfr402	Kars
		Olfr1129	Olfr410	Cd2bp2
		Olfr1126	Adh7	Mrpl11
		Olfr1128	Lhx3	Rps2
		Olfr1135	Cct8l1	Adipor1
		Olfr1133	Lrrc10	Eif2b3
		Olfr1134	Sp8	Gnl2
		Olfr1130	Pou4f3	Srcap
		Olfr1136	Hrg	Sdad1
		Olfr1131	Nphs2	Gtf3c4
		Olfr1137	Cpxcr1	Taf13
		Olfr1132	Tktl2	Kif18a
		Olfr1141	Foxd4	Ttc1
		Olfr1145	Muc3	Thoc1
		Olfr152	Xkr7	Tfcp2l1
		Olfr1140	Izumo2	Dctn6
		Olfr1138	Vpreb2	Zc3h10
		Olfr1143	Npvf	Pdcd2l
		Olfr1148	Rnf17	Cdc73
		Olfr1152	Ptf1a	Stat3
		Olfr74	Olfr1135	Yae1d1
		Olfr1156	Olfr1136	Nudt21
		Olfr1157	Olfr1137	Keap1
		Olfr1155	Olfr1138	Adck4
		Olfr1153	Olfr1140	Psmd4
		Olfr1151	Olfr1141	Srsf5
		Olfr1154	Olfr1152	Snrpe
		Olfr1162	Olfr1153	Mtfmt
		Olfr73	Gpr50	Polg
		Olfr1161	Rptn	Cherp
		Olfr1163	Slc36a3	Nr2c2ap
		Olfr1164	Hcrtr2	Trim71
		Olfr1160	Tmprss11a	Prim1
		Olfr1158	Pou5f2	Atp5c1
		Olfr1170	Atp6v1g3	Mnat1
		Olfr1168	Ms4a13	Heatr3
		Olfr1167	Usp29	Ssb
		Olfr1166	Rp1l1	Anapc2
		Olfr1173	Mybpc3	Smn1
		Olfr1176	Krtap26-1	Vars
		Olfr1184	Krt35	Gm10767
		Olfr1180	Gucy2f	Exosc2
		Olfr1181	Slco6c1	Lig1
		Olfr1183	Slco6d1	Rpf2
		Olfr1179	Olfr721-ps1	Rnf8
		Olfr1178	Rbm46	Kif20b
		Olfr1182	Gja8	Wbscr16
		Olfr1188	Olig2	Phf5a
		Olfr1186	Triml1	Noc3l
		Olfr1189	Prdm9	Ska2
		Olfr1196	Rax	1810043H04Rik
		Olfr1199	Pla2g2f	Rpl29
		Olfr1198	Il13	Kri1
		Olfr1195	Gsx1	Pus7
		Olfr1193	Olfr1201	Gm13139
		Olfr1197	Olfr1205	Mrpl49
		Olfr1204	Olfr1206	Tbp
		Olfr1202	Cox7b2	Exoc1
		Olfr1205	Serpinb12	Phb
		Olfr1201	Prss37	Dnmt1
		Olfr1200	Iapp	Gabpb1
		Olfr1206	Txndc8	Eif3h
		Olfr1209	Slc34a1	Cox6c
		Olfr1214	Dmrtc2	Impdh2
		Olfr1211	Prdm13	Dtymk
		Olfr1217	Ifit1bl1	Shfm1
		Olfr1208	Ifit1bl2	D19Bwg1357e
		Olfr1212	Ifit1	Kctd10
		Olfr1216	Dgat2l6	Rad1
		Olfr1213	1700024G13Rik	Nfu1
		Olfr1215	Krtap11-1	Uba52
		Olfr1221	Vmn1r237	Nudcd3
		Olfr1220	Olfr464	Rpp38
		Olfr1223	Vax1	Csnk2b
		Olfr1218	1700080O16Rik	Znhit2
		Olfr1219	Magea4	Eftud1
		Olfr1222	Magea10	Hspe1
		Olfr1226	Lbx1	2310061I04Rik
		Olfr1228	Lin28a	Psmd3
		Olfr1229	Resp18	Cpsf3l
		Olfr1225	Nkx2-2	Hinfp
		Olfr1239	F13b	Spc24
		Olfr1232	Gh	Rps24
		Olfr1233	Cstl1	Rps16
		Olfr1230	Olfr982	Mrpl37
		Olfr1238	Olfr403	Ncapg2
		Olfr1234	Olfr43	Eef1g
		Olfr1231	Irgc1	Ahcy
		Olfr1243	Prrxl1	Pole
		Olfr1240	Pla2g2e	Ccdc86
		Olfr1242	Flg2	Gnb1
		Olfr1241	Tbc1d21	Vbp1
		Olfr1250	Cyp2a4	Ndufa11
		Olfr1249	Cyp2a5	Rfc3
		Olfr1246	Cyp2a22	Rpl37a
		Olfr1248	Cyp2a12	Ppp1r8
		Olfr1245	Sprr4	Hist1h2ag
		Olfr1247	Gfral	Ints4
		Olfr1251	Olfr692	Uqcc2
		Olfr1252	Tgif2lx2	Rplp1
		Olfr1254	Tgif2lx1	Fam58b
		Olfr1253	Csn2	Tubgcp5
		Olfr1255	Got1l1	Mybbp1a
		Olfr1259	Lcn9	Srsf7
		Olfr48	Htr6	Nrf1
		Olfr1258	Chrna6	Mrps33
		Olfr1256	Asz1	Stard7
		Olfr1257	Olfr623	Nop58
		Olfr1262	Olfr65	Psmb1
		Olfr1265	Clrn1	Trim28
		Olfr140	Trpd52l3	Hist1h2bn
		Olfr1261	Banf2	Haus7
		Olfr1263	Chrnb3	Nupl2
		Olfr1260	Sox1	Taf8
		Olfr1264	Defb21	Mrpl33
		Olfr32	Otx2	Rps27
		Olfr1270	Zswim2	A530032D15Rik
		Olfr1269	Trpc7	E2f4
		Olfr1273-ps	Tfap2d	Eras
		Olfr1506	Tssk2	Trappc4
		Olfr1271	Znrf4	Snrpd2
		Olfr1272	Cd200r3	Ect2
		Olfr142	Adam2	Ndufb8
		Olfr1274-ps	Noto	Hnrnpl
		C1qtnf4	Htr2c	Srp9
		1700029I15Rik	Pglyrp2	Psmc6
		Chst1	Otop3	Ddx59
		Alx4	Spem1	Cdc5l
		Gm13889	Frmd7	Ldha
		Rag1	Catsper4	Hist1h4n
		Rag2	Tas2r119	Nat10
		Cd44	6430550D23Rik	Gtf2h2
		Ehf	Olfr657	Taf1c
		A930018P22Rik	Zan	Psmg4
		Pin1-ps1	Krt40	Scai
		Fshb	Mc2r	Ahctf1
		Kcna4	Krt33a	Det1
		Bdnf	Krt33b	Fam60a
		Fibin	Krt31	Psmd6
		Bbox1	Sult6b1	Ppil4
		Slc5a12	Awat1	Fignl1
		Muc15	Tcp10b	Eif2b4
		Olfr1275	Il17a	Ctr9
		4930430A15Rik	Olfr354	1810026J23Rik
		Olfr1277	Sdr9c7	Slc35a2
		Olfr1276	Apof	Ctdp1
		Olfr1279	Htr5a	Rrp12
		Olfr1278	Pnlip	Csnk1a1
		Olfr1280	Krtap14	Phb2
		Olfr1282	Krtap4-7	Mrpl3
		Olfr1284	Gm11555	Mphosph6
		Olfr1283	Il25	Grpel1
		Olfr1286	Slc6a18	Pole4
		Olfr1281	Olfr231	Cox17
		Olfr1287	Krtap3-3	Ptbp1
		Olfr1288	Krtap3-2	Rpl28
		Olfr1294	Olfr574	Gtf2h3
		Olfr1289	Olfr691	Tinf2
		Olfr1295	Ghrh	Mis12
		Olfr1290	Tspo2	Ddx11
		Olfr1299	Olfr1038-ps	Ndufaf4
		Olfr1297	Olfr620	Atp6v0b
		Olfr1298	Olfr624	Grb2
		Olfr1302	Rho	Polr1c
		Olfr1301	Ceacam10	Meaf6
		Olfr1303	Nlrp4a	Uba3
		Olfr1306	Gk2	Paf1
		Olfr1305	Olfr1354	Sf3b3
		Olfr1308	Olfr8	Mapre1
		Olfr1307	Olfr1352	Cox6b1
		Olfr1314	Ghsr	Atp2a2
		Olfr1309	Hao1	Mga
		Olfr1311	Cetn1	Kif11
		Olfr1313	Pnliprp1	Prepl
		Olfr1312	Hmx1	Med21
		Olfr1310	Chat	Eif3l
		Olfr1316	Nlrp9c	Cct5
		Olfr1317	Nlrp9a	Supv3l1
		Olfr1318	Krt25	Bclaf1
		BC125332	Prss33	Gemin5
		Chrm5	Neurod4	Polr1b
		Tmco5b	Teddm1b	Mrps34
		Grem1	Teddm1a	Faf2
		Actc1	Alppl2	Ecd
		Gjd2	Alpi	Brd4
		Tmco5	Akp3	Birc6
		Gpr176	Krtap1-4	Vps16
		Plcb2	Krtap1-3	1700001F09Rik
		Phgr1	Krtap9-3	Emc3
		Gm1337	Tmem225	Gtpbp4
		Gm14137	Cfhr1	Lipt1
		Dll4	Vmn1r32	Rpp30
		Pla2g4d	Vmn1r33	Psmc4
		Tgm7	Vmn1r34	Nom1
		Tgm5	Vmn1r35	Wac
		Strc	Vmn1r36	Vprbp
		Serinc4	Vmn1r37	Sacm1l
		Mageb3	Vmn1r38	Cul4b
		Trim69	Vmn1r39	Rab7
		Duoxa2	Olfr145	Rpl30
		Duox2	Olfr15	Alg2
		Slc28a2	Cacng3	Pex12
		Gm14085	Aqp8	Abt1
		Sema6d	Clca1	Lsg1
		Ctxn2	Kcnk10	Kmt2b
		Shc4	Hoxd12	Malsu1
		Fgf7	Olfr520	Vmn2r29
		Adra2b	Tlx1	Kansl3
		Astl	Prop1	Mipep
		Prom2	Mc5r	Kif23
		Il1a	Slc25a2	Ptcd1
		Il1b	Trim60	Mastl
		F830045P16Rik	CN725425	Eif4g2
		Tgm6	Rnase12	Gmeb2
		Tmem239	Tmigd1	Rpp21
		1700020A23Rik	Olfr1093	Ankle2
		Avp	Olfr1094	Vmn2r44
		Oxt	Olfr1102	Eny2
		Siglec1	Crnn	Chchd4
		Hspa12b	Evx1	Nutf2
		Adra1d	Morc1	Mrps5
		Erv3	Trpc5	Rragc
		Prnd	Olfr569	Rpap1
		Prokr2	Olfr582	Myc
		Chgb	Olfr584	Imp3
		6330527O06Rik	Olfr556	Gtf3c3
		Ism1	Slc32a1	Rarg
		Otor	Pax1	Psma3
		Banf2	Zfp648	Fig4
		Gm5535	Tshb	Mtif2
		1700010M22Rik	Olfr1086	Ndufab1
		Gm14092	Foxe3	Rgp1
		4930529M08Rik	Cacng5	Timeless
		Insm1	Foxb1	Rpa1
		Nkx2-4	Ankrd7	Usp37
		Nkx2-2	A26c3	Snrpg
		Sstr4	Adam25	Fh1
		Thbd	Adam20	U2af2
		Cd93	Adam39	Med30
		Cst11	Sis	Smu1
		Cstl1	Nr2e1	Rbbp6
		Cst8	Awat2	Zfp600
		Cst12	Sstr4	Gtf2h1
		8030411F24Rik	Tmem132d	Tfip11
		9230104L09Rik	Pla2g4e	Ndufa13
		Cst13	Krt36	Sdhb
		Cst9	Galr1	Chaf1b
		Cst10	Glra1	Mybl2
		Cst7	Olfr412	Dclre1b
		Gm14151	Tnr	Dhodh
		4921509C19Rik	Rdh8	Srd5a3
		Snph	Pdx1	Zfp574
		Rad21l	Vrtn	Rnaseh2c
		5430405G05Rik	Cabs1	Rpl19
		Angpt4	Olfr1044	Dhx36
		Defb23	Sohlh1	Rft1
		Defb21	Olfr77	Chtf18
		Defb19	Olfr867	Mrpl10
		Defb45	Olfr39	Clns1a
		Defb28	Kif2b	Chd8
		Defb26	Isx	Aifm1
		Defb22	Tas2r144	Cdc23
		Rem1	Olfr417	Wrb
		Foxs1	Olfr248	Romo1
		Mylk2	Slc17a6	Jak1
		Bpifb2	Olig3	Ube2g2
		Sun5	Defb23	Mrpl41
		Bpifb6	Kcna10	Agps
		Bpifa2	Tgm6	Aurkaip1
		Bpifa6	Treml4	Msmo1
		Bpifa1	Krtap15	Mrps18a
		Bpifa3	Il17f	Mcm9
		Bpifa5	Olfr683	Hist1h2bp
		Bpifb9a	Scrt2	Cenpo
		Bpifb1	Rnase10	Sec16a
		1700007I08Rik	Olfr419	Eif2b5
		1700003F12Rik	Olfr671	Ddx41
		a	Olfr675	Nol6
		Fam83c	Dmrtb1	Hus1
		Gdf5	Olfr151	Gars
		Scand1	Olfr160	Eif2s1
		Sla2	Gfra4	Zfp335
		Gm1332	Drd3	Cfap20
		Vstm2l	Tchhl1	Hist1h3g
		Adig	Krtap4-16	Atp5j2
		Gm826	Myf5	Mtch2
		Mafb	Krtap1-5	Pmpca
		Wisp2	Spink14	Suds3
		Kcnk15	Cst11	Usp10
		Svs3b	Mc3r	Imp4
		Svs2	Foxb2	Srebf2
		Wfdc5	Ms4a5	Pex10
		Wfdc15b	4933402J07Rik	Lsm6
		Wfdc12	Duxbl3	Ccdc130
		Matn4	Rnd2	Med18
		Svs6	Clec3a	Pold1
		Svs3a	Krt28	Tpi1
		Svs5	Gcg	Zbed4
		Slpi	Dmp1	Metap2
		Wfdc9	Il9	Brpf1
		Wfdc8	Tas2r139	Cenpw
		Spinlw1	Vsx2	E4f1
		Spint3	Dazl	Ptpn23
		Wfdc6a	Ins2	Pkm
		Wfdc16	Gsx2	Crnkl1
		Wfdc6b	Olfr750	Prpf8
		Wfdc3	Neurog1	Mtpap
		Spint4	Cldn17	Polr3c
		Wfdc13	Cnga2	Gm3500
		Spata25	Gpr31b	Prkrir
		Neurl2	Dmrt1
		Ocstamp	Rtp2
		Zfp663	Slc6a7
		Slc2a10	Slc18a3
		Fam65c	Gm45618
		Kcng1	Krtap5-2
		Cyp24a1	Gm40460
		Cbln4	Gm4559
		Mc3r	Olfr109
		1700029J11Rik	Wfdc9
		Gcnt7	Gm4553
		Spo11	Accsl
		Pck1	Olfr110
		Ankrd60	Olfr111
		1700021F07Rik	Dcaf4
		1700010B08Rik	Olfr1264
		Tubb1	Svs2
		Zfp831	Svs3b
		Gm14431	Svs3a
		Gm14306	Olfr90
		Gm14308	Olfr91
		100043387	Olfr92
		Ppp1r3d	Olfr93
		Cdh26	Olfr753-ps1
		BC066135	Il3
		Ntsr1	Bpifa3
		Srms	Spo11
		Ptk6	Ankrd60
		BC051628	Ccdc83
		4930526D03Rik
		Gm14496
		Vtcn1
		Zfhx4
		LOC100038947
		Ralyl
		Egfem1
		Nlgn1
		Fat4
		Kcnab1
		Fga
		Hsd3b3
		Nr1h5
		Slc22a15
		Dpyd
		Enpep
		Col25a1
		Wdr63
		Ptger3
		Negr1
		Hnf4g
		Gm5150
		Bhlhe22
		Spata16
		Tmem212
		Mecom
		Kcnmb3
		Kcnmb2
		Pex5l
		Trpc3
		Ccdc144b
		Gm5148
		Pcdh10
		Slc7a11
		Maml3
		Trpc4
		Gpr149
		Vmn2r6
		Gm1647
		Sis
		Fstl5
		Gm17359
		Lrat
		Gucy1a3
		Cd5l
		Fcrl5
		Kcnn3
		Sprr2d
		Selenbp2
		Hsd3b5
		Hsd3b4
		Tbx15
		Spag17
		Syt6
		Kcnd3
		Fndc7
		5330417C22Rik
		Ntng1
		Olfm3
		Palmd
		D3Bwg0562e
		4833424O15Rik
		Prss12
		Ndst3
		1700006A11Rik
		Ndst4
		Arsj
		Alpk1
		Ccdc109b
		Lrit3
		Bank1
		B930007M17Rik
		Unc5c
		Col24a1
		Dnase2b
		Eltd1
		Ak5
		St6galnac5
		Slc44a5
		Tnni3k
		Lrrc7
		1700008P02Rik
		Fabp4
		Fabp9
		Pmp2
		Fabp12
		Slc10a5
		Slc7a12
		Gm9733
		Sirpb1a
		Sirpb1b
		Crh
		Trim55
		Cp
		Cpb1
		Cpa3
		Agtr1b
		Tnfsf10
		Ghsr
		Slc2a2
		Arpm1
		Samd7
		Cldn11
		Qrfpr
		Il2
		Il21
		Pcdh18
		Mgst2
		Stoml3
		Postn
		A730037C10Rik
		Mab21l1
		Tm4sf1
		Tm4sf4
		Gm410
		Fam194a
		Clrn1
		Gpr171
		P2ry14
		P2ry13
		P2ry12
		Gpr87
		Gm5538
		Gm8298
		C130079G13Rik
		Aadacl2
		Aadac
		Sucnr1
		Vmn2r2
		Vmn2r3
		Vmn2r4
		Vmn2r5
		Vmn2r7
		Ptx3
		Shox2
		Rarres1
		Il12a
		Arl14
		1110032A04Rik
		Otol1
		Slitrk3
		Serpini2
		Rxfp1
		Gria2
		Tdo2
		Ctso
		Gucy1b3
		Accn5
		Npy2r
		Fgb
		Tigd4
		Dear1
		Glt28d2
		Mab21l2
		Fcrls
		Fcrl1
		4933430H15Rik
		Insrr
		Sh2d2a
		Ttc24
		Hapln2
		Bglap
		Bglap2
		Rxfp4
		Rab25
		Dcst1
		S100a5
		S100a3
		S100a8
		Pglyrp4
		S100a9
		S100a7a
		Pglyrp3
		Prr9
		Lor
		Lelp1
		Sprr2a1
		Sprr2b
		Sprr2i
		Sprr2f
		Sprr2h
		Sprr3
		Sprr2k
		Sprr1b
		Sprr4
		Smcp
		Sprr1a
		Ivl
		Lce1d
		Lce1a2
		Lce1e
		Lce1f
		Lce1c
		Lce6a
		Lce1a1
		Lce1b
		Lce1h
		Lce1i
		Kprp
		Lce1g
		Lce1k
		Lce1l
		2310050C09Rik
		Lce3c
		Lce3b
		Lce3a
		Lce3f
		2310001H18Rik
		Crct1
		Lce1m
		Crnn
		Flg2
		Hrnr
		Tchhl1
		Rptn
		Tdpoz1
		Gm10697
		Gm9125
		C2cd4d
		Lingo4
		Celf3
		Ctss
		Hist2h4
		Hist2h2aa1
		Hist2h2ac
		Hist2h3b
		Hist2h2ab
		Fcgr1
		Gja8
		Cd160
		Gja5
		Olfr1402
		Gm5544
		Adam30
		Reg4
		Hsd3b2
		Hsd3b6
		Hao2
		Hsd3b1
		Cd101
		Nhlh2
		Tshb
		Olfml3
		Fam19a3
		Wnt2b
		4930564D02Rik
		Adora3
		Chi3l4
		Chia
		BC051070
		Olfr266
		Cd53
		Kcna3
		Kcna2
		Cym
		A630076J17Rik
		Prok1
		Kcna10
		Slc16a4
		Slc6a17
		Ubl4b
		Alx3
		Eps8l3
		Gpr61
		Sypl2
		Mybphl
		1700013F07Rik
		Aknad1
		4930443G12Rik
		Amy2b
		Amy2a2
		Amy2a5
		Vcam1
		Gpr88
		Lrrc39
		4930432M17Rik
		Fabp2
		Myoz2
		Neurog2
		Tifa
		Cfi
		Rrh
		Agxt2l1
		Dkk2
		Cxxc4
		Tacr3
		Emcn
		Gm4861
		4930579F01Rik
		Adh1
		Adh6a
		Gbp7
		Gbp5
		Gbp3
		Gbp1
		Clca1
		Gm6289
		Clca6
		Clca5
		Mcoln2
		Lpar3
		4930503B20Rik
		H28
		Ptgfr
		Ifi44
		Asb17
		Lhx8
		Rpe65
		Fhl5
		Lrrc69
		Mmp16
		Lingo2
		E130309F12Rik
		Pappa
		Astn2
		Rasef
		Nfia
		Skint5
		Agbl4
		Hivep3
		Pramel4
		Sdr16c5
		Tox
		Clvs1
		Cngb3
		Nkain3
		Pou3f2
		Klhl32
		Gabrr2
		Pax5
		Gabbr2
		Col15a1
		Acnat2
		Grin3a
		Actl7b
		Musk
		Svep1
		Mup14
		Tnc
		Frmd3
		Frem1
		Slc24a2
		Ifna6
		Ror1
		Sgip1
		Pde4b
		1700024P16Rik
		Ttc22
		Glis1
		3110021N24Rik
		4930522H14Rik
		Skint3
		Skint9
		Skint4
		Skint6
		Skint11
		Gm12824
		Gm1661
		Col16a1
		Gm853
		Lactbl1
		C1qc
		Vwa5b1
		Pax7
		Padi1
		Gm13040
		Oog2
		Gm13178
		Aadacl3
		Rex2
		Ajap1
		Vmn1r3
		Vmn1r2
		Sdr16c6
		Cyp7a1
		Gdf6
		Cdh17
		Slc26a7
		Calb1
		Slc7a13
		Atp6v0d2
		Prdm13
		Gja10
		Spaca1
		Gm136
		Cga
		Ifnk
		1700009N14Rik
		Tmem215
		Aqp7
		1110017D15Rik
		Ccl21b
		Gm13308
		Gm13298
		Ccl27b
		Gm13305
		Ccl19
		Ccl21a
		N28178
		1700022I11Rik
		Cd72
		Fam166b
		Msmp
		Hrct1
		4930412F15Rik
		Olfr71
		Olfr70
		Olfr156
		Olfr157
		Olfr159
		Olfr155
		Ccin
		Gm829
		E230008N13Rik
		Foxe1
		Hemgn
		Nr4a3
		Acnat1
		Aldob
		Ppp3r2
		Cylc2
		4930547C10Rik
		Olfr273
		Olfr272
		Olfr275
		Olfr270
		Nipsnap3a
		Tal2
		Actl7a
		Txndc8
		Olfr267
		Slc46a2
		Mup15
		Mup8
		Mup9
		Mup1
		Gm2083
		Mup12
		Mup13
		Mup16
		LOC100048884
		Mup17
		Mup19
		Mup5
		Mup20
		Mup21
		Kif12
		Ambp
		Orm3
		Orm2
		Orm1
		1700018C11Rik
		Tnfsf15
		Tnfsf8
		Tlr4
		LOC100502924
		Gm11757
		Gm11756
		2310002L09Rik
		Tyrp1
		Cer1
		Gm12597
		Ifnb1
		Ifna9
		Ifnab
		Ifna13
		Ifna12
		Ifna2
		Gm13280
		Ifna14
		C87499
		Gm13272
		Gm13277
		Gm13278
		Gm13285
		Gm13275
		Ifnz
		Gm13276
		Ifna7
		Ifna11
		Gm13271
		Gm13286
		Gm13283
		Ifne
		Ifna5
		Ifna1
		Ifna4
		Dmrta1
		Izumo3
		Lrrc19
		4930579C15Rik
		Cyp2j12
		Cyp2j11
		Cyp2j8
		Cyp2j5
		Gm12695
		Angptl3
		Ube2u
		Gm12789
		Tctex1d1
		4921539E11Rik
		C8a
		Bsnd
		Fam151a
		Cdcp2
		Ldlrad1
		Dio1
		Podn
		Cdkn2c
		Dmrta2
		Skint7
		Slc5a9
		Skint8
		Skint1
		Skint10
		Foxd2
		Foxe3
		Cyp4x1
		Cyp4a29-ps
		Cyp4a12a
		Cyp4a10
		Cyp4a30b-ps
		Cyp4a12b
		Cyp4a14
		Cyp4a31
		Cyp4a32
		Cyp4b1
		4930544O15Rik
		Kncn
		1700042G07Rik
		Ccdc17
		Tctex1d4
		Mpl
		Olfr62
		Wdr65
		Olfr1337
		Olfr1341
		Olfr1338
		Olfr1342
		Olfr1340
		Olfr1339
		Olfr1335
		Olfr1330
		Olfr1328
		Olfr1331
		Olfr1329
		Olfr1333
		Lao1
		Ermap
		Guca2b
		Guca2a
		Edn2
		Gm8439
		Slfnl1
		Cited4
		Tmco2
		Gm12886
		Gm12888
		Gm12887
		9530002B09Rik
		Oxct2b
		Heyl
		Nt5c1a
		Oxct2a
		Dnali1
		Tfap2e
		CK137956
		4930465A12Rik
		Hmgb4
		Tlr12
		A3galt2
		Tssk3
		1700125D06Rik
		Fam167b
		Tmem200b
		Oprd1
		Nr0b2
		Catsper4
		Gm7534
		Htr1d
		4930549C01Rik
		C1qb
		C1qa
		Gm13011
		1700013G24Rik
		Cela3b
		Ldlrad2
		Pla2g2d
		Pla2g2a
		Pla2g2f
		Rnf186
		Htr6
		Hspb7
		Gm694
		Slc25a34
		Agmat
		Ctrc
		Lrrc38
		Oog4
		Gm13088
		Gm13023
		Gm13103
		Gm13084
		Pramef17
		Gm13102
		Oog3
		C87977
		Pramel5
		1700012P22Rik
		Gm13125
		9430007A20Rik
		Gm13124
		Gm13177
		Gm436
		Gm438
		Nppa
		Nppb
		Ptchd2
		Angptl7
		Gpr157
		Slc2a7
		Uts2
		Hes2
		Hes3
		Ccdc27
		Actrt2
		Ttc34
		Hes5
		Gabrd
		Tmem240
		Tmem88b
		Tas1r3
		Tnfrsf18
		Ttll10
		Isg15
		2310042D19Rik
		Sdk1
		Zfp804b
		Sema3d
		Slc2a9
		Kcnip4
		Ldb2
		Slc10a4
		Gabrb1
		Cxcl15
		Tmprss11f
		Tmem132c
		Caln1
		Srrm3
		Cyp3a25
		Kpna7
		4930511M11Rik
		Grm3
		Sema3a
		Hgf
		Cd36
		Ccdc146
		Fbxl13
		Slc26a5
		Lhfpl3
		Htr5a
		Otof
		Cib4
		Hgfac
		Stk32b
		Nsg1
		C1qtnf7
		Ppargc1a
		Ccdc149
		Pcdh7
		3110047P20Rik
		Grxcr1
		Gabrg1
		Gabra2
		Cnga1
		Txk
		Corin
		Spata18
		1700023E05Rik
		Tecrl
		Epha5
		Stap1
		Ugt2b5
		Tmprss11e
		Sult1b1
		Csn1s2a
		Afm
		Gm3286
		E330014E10Rik
		Fras1
		Antxr2
		Fgf5
		1700007G11Rik
		Tmem150c
		Agpat9
		Arhgap24
		Mapk10
		Gbp11
		Srrm4
		Tmem233
		Tbx5
		Oas1e
		Myl2
		Abcb9
		Tmem132b
		BC055004
		Card11
		Cyp3a11
		Cyp3a57
		4930449I24Rik
		Flt1
		Rxfp2
		Wdr95
		Kl
		4932412H11Rik
		1700015F17Rik
		4921511H03Rik
		Steap4
		Gm6460
		4933402N22Rik
		Speer3
		Speer4e
		Gm9758
		Gm17019
		Speer4d
		Speer4f
		Gnat3
		Asb10
		Galntl5
		Cct8l1
		5031410I06Rik
		Gm10220
		Speer4a
		Gm10471
		Speer4b
		Shh
		Mnx1
		Il6
		3110082J24Rik
		Kcnk3
		Tcf23
		Ucn
		Gckr
		4930548H24Rik
		Gm1673
		Dok7
		Adra2c
		Hmx1
		Psapl1
		Cytl1
		Drd5
		Otop1
		Nkx3-2
		Clrn2
		Sod3
		Slc34a2
		Cckar
		G6pd2
		Gm17384
		Tlr6
		Tlr1
		Rhoh
		Nsun7
		Phox2b
		Shisa3
		Gm5108
		Zar1
		Gm5868
		Nipal1
		Lrrc66
		Nmu
		Arl9
		Gnrhr
		Tmprss11c
		Tmprss11a
		Tmprss11g
		Tmprss11bnl
		Ugt2b34
		Ugt2b1
		Ugt2b35
		Ugt2b36
		Ugt2b37
		Ugt2a3
		Ugt2a1
		Ugt2b38
		Sult1d1
		Sult1e1
		Csn2
		Csn1s1
		4930432K09Rik
		Csn1s2b
		Odam
		4931407G18Rik
		Csn3
		Smr2
		Gm7714
		Prol1
		Amtn
		Ambn
		Igj
		Enam
		Gc
		Npffr2
		Afp
		Alb
		5830473C10Rik
		Cxcl5
		Pf4
		Cxcl3
		Ppbp
		Cxcl1
		Cxcl2
		Epgn
		Ereg
		Areg
		Btc
		Cxcl11
		Cxcl9
		Cxcl10
		2010109A12Rik
		C87414
		BC061212
		A430089I19Rik
		Gm3139
		AU018829
		D5Ertd577e
		Cxcl13
		Gk2
		Prdm8
		Bmp3
		Prkg2
		Nkx6-1
		Hsd17b13
		Gm17660
		Sparcl1
		Dmp1
		Dspp
		Mepe
		Ibsp
		Gbp10
		Gbp6
		Barhl2
		Lpcat2b
		1700028K03Rik
		Gfi1
		Pde6b
		Slc26a1
		Vmn2r9
		Vmn2r8
		Tmed11
		Vmn2r10
		Vmn2r12
		Vmn2r11
		Vmn2r13
		Vmn2r14
		Vmn2r16
		Vmn2r15
		Vmn2r17
		Crybb1
		Gm6583
		Gm6588
		Crybb2
		Tmem119
		Dao
		Oasl2
		Sds
		Lhx5
		Ccdc42b
		Iqcd
		Oas1f
		Oas1h
		Adam1b
		Il31
		Lrrc43
		Gpr81
		Niacr1
		Fam101a
		2021-09-14
		A330070K13Rik
		Eln
		Wbscr28
		Cldn13
		Trim50
		Ccl24
		Ccl26
		2310043J07Rik
		Myl10
		Vgf
		Ache
		Actl6b
		Pilra
		Pilrb1
		Cyp3a13
		Pilrb2
		Azgp1
		Smok3a
		Smok3b
		1700123K08Rik
		Gm5294
		Cyp2w1
		Gpr30
		C130050O18Rik
		Uncx
		Elfn1
		Tff1
		Cngb1
		4933411G11Rik
		Grid2ip
		Ankrd61
		Ocm
		1700018F24Rik
		Gm4871
		Cyp3a16
		Cyp3a41a
		Cyp3a44
		Cyp3a59
		1700001J03Rik
		Gm6370
		Gm6408
		Gm3404
		Gm3402
		Gm3409
		Gsx1
		Pdx1
		Cdx2
		Flt3
		Prhoxnb
		6330406I15Rik
		Zar1l
		Vmn2r18
		Gxylt2
		Ano2
		Abcc9
		Ppp1r3a
		Thsd7a
		Slc13a1
		Grm8
		Grid2
		Fam190a
		Ctnna2
		Fam19a1
		Cntn4
		Pparg
		Grm7
		Vmn2r24
		Klra1
		Gm4736
		Lmo3
		1700023A16Rik
		Hepacam2
		Dlx6
		Col28a1
		Nxph1
		Foxp2
		Wnt2
		Cftr
		Kcnd2
		Cadps2
		Asb15
		Tmem229a
		Cpa4
		Chrm2
		Akr1d1
		Tbxas1
		Mgam
		Gm5567
		Sval2
		Nobox
		Hoxa7
		Creb5
[truncated: 4,717 more rows]
