# Supplementary material for: A multi-omics integrative analysis based on CRISPR screens re-defines the pluripotency regulatory network in ESCs
Source: Research Square preprint supplement (doi:10.21203/rs.3.rs-951395/v1), 2023-03-13
Supplement: Supplementary file 4 [file Supplementary Data5.xlsx]

## Sheet: Sheet1
Differentiation	Low in mESC	High in mESC	Common(overlapped)	Context-specific
Pax6	Als2cr12	Prim2	Mrpl51	42434
Nes	Bai3	Lactb2	Mrpl52	43895
Tubb3	Sntg1	Tpp2	Ndufa11	0610009D07Rik
Fabp7	Dpp10	Agfg1	Mrpl53	0610009O20Rik
Zic1	Serpinb3b	Eif4e2	Prelid1	0610010B08Rik
Zic2	Cd247	Ppip5k2	Tardbp	0610031J06Rik
Zic3	Capn8	R3hdm1	Guk1	1110004E09Rik
Zic4	Cpa6	Adipor1	Trit1	1110008L16Rik
Zic5	Khdrbs2	Kif14	Naca	1110025L11Rik
Foxp2	Tmem182	Prrc2c	Eif3i	1110037F02Rik
Grm2	Plcl1	Pex19	Ppp4c	1190007I07Rik
Kcnc1	Dnahc7a	Mosc2	Rpl7	1700001F09Rik
Glra1	Pard3b	Tcea1	Fbl	1700001L19Rik
Accn2	Cd28	Atp6v1h	Rpl8	1700008F21Rik
Gabra3	Abca12	Tceb1	Rpl3	1700013G24Rik
Oprl1	Erbb4	Smap1	Eif3a	1700018F24Rik
Sox1	St8sia4	Dst	Mrpl49	1700021F05Rik
Gli1	Cntnap5b	Tmem131	Eif3d	1700022I11Rik
Gli2	Nckap5	6330578E17Rik	Rpl4	1700061G19Rik
Gli3	Astn1	Rev1	Ddx47	1700102P08Rik
Olig1	Tnr	Map4k4	Eif3f	1700123I01Rik
Olig2	Rgs7	Kdelc1	Rbbp6	1810009A15Rik
Olig3	Esrrg	Wdr75	Mrpl46	1810013L24Rik
Gata6	Xkr4	Myo1b	Snupn	1810043H04Rik
Gata4	Rp1	Hibch	Trmt6	2210016L21Rik
Afp	St18	Sf3b1	Hars	2310003H01Rik
Sox17	Ppp1r42	Bzw1	Urb1	2310011J03Rik
Pdgfra	Kcnb2	Sgol2	Cpsf3	2310022A10Rik
Sox7	Gm106	Als2	Cpsf2	2310036O22Rik
Lamb1	Tfap2d	Cyp20a1	Nanog	2310061I04Rik
Sparc	Pkhd1	Adam23	Dna2	2410015M20Rik
Pth1r	Kcnq5	Ccnyl1	Polrmt	2410127L17Rik
Hnf4a	Col9a1	Fn1	Wdr5	2410131K14Rik
Dab2	Col19a1	Mreg	Uba2	2510009E07Rik
Ttr	4931408C20Rik	Igfbp2	Ltv1	2610318N02Rik
Foxa2	Gm597	Usp37	Ddx56	2610507B11Rik
Trf	Lyg1	Ttll4	Mrpl55	2610524H06Rik
Apoa1	Npas2	Epha4	Xpo1	2700050L05Rik
Apoa4	Il1rl1	Serpine2	Snrpd3	2700060E02Rik
Vil1	Slc9a2	Trip12	Dkc1	2700062C07Rik
Col4a2	Tmeff2	Dis3l2	Nip7	2810004N23Rik
Lrp2	Aox3	Pde6d	Pkm	2810006K23Rik
Ende	Cdk15	Gigyf2	Nop10	2810408M09Rik
Pyy	Dytn	Dgkd	Snrpd2	2810474O19Rik
Nepn	Pth2r	Inpp5d	Farsa	2900026A02Rik
Foxq1	Unc80	Atg16l1	Etf1	3110001D03Rik
Pdgfra	Myl1	Atg4b	Farsb	3110009E18Rik
Kdr	Ikzf2	Zranb3	Nop16	3110062M04Rik
Tcf21	Vwc2l	Ubxn4	Ddx21	3300002I08Rik
Igf2	2021-03-04	Dars	Ncl	3830406C13Rik
Chrd	Ankar	Srgap2	Haus3	4921524J17Rik
Shh	Ccdc108	Nucks1	Fip1l1	4930427A07Rik
Epha4	Wnt10a	Zc3h11a	Rnf40	4930467E23Rik
Pax1	Pax3	Nr5a2	Ube2t	4930503E14Rik
Meox1	Sgpp2	Cdc73	Csnk1a1	4930555G01Rik
Tcf15	9430031J16Rik	1200016B10Rik	Toe1	4930567H17Rik
Osr1	Col4a3	Dhx9	Fancl	4931406B18Rik
Pax2	Col4a4	Ralgps2	Skp1a	4931414P19Rik
Pax8	Sphkap	Rfwd2	Oraov1	4932443I19Rik
Bmp4	Sp100	Cacybp	Rnaseh2c	4933402J07Rik
Wnt5A	Alpi	Kifap3	Ube2c	4933402N22Rik
Hand1	Ugt1a1	Nme7	Mrpl35	5031410I06Rik
Irx3	Ngef	Dcaf6	Ecsit	6430573F11Rik
Foxf1	Spp2	Mael	Mrpl32	9030624G23Rik
Hand2	Asb18	Uck2	Thap11	9130011E15Rik
Nkx2.5	Col6a3	Nuf2	Znhit2	A130010J15Rik
Gata2	Twist2	Uap1	Atp5b	A230046K03Rik
T	Pdcd1	Pfdn2	Dohh	A330070K13Rik
Mixl1	Slco6c1	Adss	Prpf38a	A530032D15Rik
	Slco6b1	Wdr26	Oxsm	Aadacl2
	Slco6d1	Lin9	Alyref	Aagab
	Cdh20	Enah	Aurkb	Aar2
	Bcl2	Lbr	Lars	Aars
	Serpinb10	Rab3gap2	Fars2	Aars2
	Cdh7	Bpnt1	Uqcrc2	Aatf
	Cdh19	Cenpf	Nol12	Abcb10
	Cntnap5a	Ppp2r5a	Dctn2	Abcb7
	Lypd1	Lypla1	Cul3	Abcd4
	Gpr39	Mrpl15	Ddb1	Abce1
	Acmsd	Pcmtd1	Rpl18a	Abcf1
	Thsd7b	Rrs1	Pced1b	Abcf2
	Faim3	Mybl1	Nol10	Abhd11
	Ctse	Cops5	Eif2b2	Abi1
	Syt2	Arfgef1	Eif2b4	Abr
	Igfn1	Tram1	Eif2b5	Abt1
	Ptprc	Terf1	Anapc10	Acad9
	Crb1	Rpl7	Anapc11	Acd
	B3galt2	Tmem70	Dhps	Acly
	Rgs13	Mcm3	Mrpl20	Aco2
	Fam5c	1110058L19Rik	Snw1	Acp1
	Prg4	Phf3	Lrr1	Acsf2
	Pdc	Ptp4a1	Rrp7a	Acsf3
	Glt25d2	Rab23	Taf2	Acsl4
	Cacna1e	Zfp451	Iars	Actb
	Fam163a	Ccdc115	Mrpl12	Actg1
	Pappa2	Imp4	Mrpl11	Actn4
	4930523C07Rik	Fam168b	Phb	Actr10
	Serpinc1	Plekhb2	Mrpl18	Actr1a
	Dnm3	Hs6st1	Polr2e	Actr1b
	Fmo3	Uggt1	Cpsf3l	Actr2
	Selp	Kansl3	Polr2j	Actr3
	Gm4846	Actr1b	Dph6	Actr5
	Nr1i3	Cox5b	Polr2i	Actr6
	Olfr426	Unc50	Polr2d	Actr8
	Ifi202b	Mitd1	Rps2	Acvr1b
	Grem2	Mrpl30	Imp4	Adam19
	Pld5	Eif5b	Polr2a	Adam25
	Gm16432	Pdcl3	Rps3	Adat2
	Kif26b	Rpl31	Eif6	Adck4
	Itpkb	D1Bwg0212e	Pih1d1	Adcy7
	Cnih3	Rnf149	Nubp1	Adgrg5
	Tgfb2	Mrps9	Tbca	Adhfe1
	Spata17	AI597479	Nhp2l1	Adipor1
	Ush2a	Uxs1	Cdc27	Adnp
	Kcnk2	1700029F09Rik	Cdc20	Adnp2
	Cr2	Ercc5	Taf1c	Adrm1
	Cd46	Slc39a10	Nop56	Adsl
	Sox17	Obfc2a	Nop58	Aen
	Npbwr1	Gls	Rpl7l1	AF366264
	3110035E14Rik	1700019D03Rik	Actl6a	Afg3l2
	Xkr9	Asnsd1	Rcl1	Agfg2
	4930444P10Rik	Ormdl1	Cdk1	Agk
	Gdap1	Gtf3c3	Polr3h	Agpat2
	Pi15	Coq10b	Cdk9	Agpat6
	Crisp4	Hspd1	Atp5j2	Agps
	Defb41	Hspe1	Polr3a	Agtpbp1
	Defb18	Mob4	Cdk7	Ahctf1
	Tfap2b	9430016H08Rik	Polr3d	Ahcy
	Il17a	1110034B05Rik	Cdc123	Ahdc1
	Khdc1c	Clk1	Elp3	AI118078
	Khdc1a	Nif3l1	1810026J23Rik	AI182371
	Khdc1b	Orc2	Nol6	Aifm1
	4933415F23Rik	Ppil3	Eral1	Ajuba
	B3gat2	Ndufb3	Ppan	Ak2
	Gm20172	Cflar	Elp6	Ak6
	4930521A18Rik	Tmem237	Cdc37	Akirin2
	Lgsn	Nop58	Eef2	Akt2
	Gm9839	Sumo1	Dnaja3	Aldh18a1
	Gm5415	Wdr12	Rpsa	Aldoc
	Cfc1	Ndufs1	D2Wsu81e	Alg1
	Prss39	Eef1b2	Gemin2	Alg11
	Prss40	Zdbf2	Crnkl1	Alg12
	Fam123c	Fastkd2	Scap	Alg13
	Lyg2	Fzd5	Yars2	Alg14
	Nms	Idh1	Fam32a	Alg3
	Gm3646	Rpe	Timm10	Alg5
	Il18r1	Acadl	Hmgb1	Alg6
	Il18rap	Atic	Dolk	Alg8
	Slc9a4	Pecr	Sf3a1	Alg9
	Pou3f3	Xrcc5	Dbf4	Alkbh1
	Gpr45	Rpl37a	Ect2	Alkbh5
	1500015O10Rik	Cxcr2	Sf3a3	Aloxe3
	A530098C11Rik	Arpc2	Sf3b1	Alpi
	4832428D23Rik	Aamp	Wac	Ambra1
	Col3a1	Pnkd	Sod1	Amd1
	Gm3852	Tmbim1	Rps5	Amd2
	Sdpr	Rqcd1	Kpnb1	Amotl2
	Mstn	Rnf25	Rps8	Anapc13
	Rftn2	Tuba4a	Rps7	Anapc15
	Hsfy2	Ankzf1	Polr1b	Anapc2
	Aox4	Stk16	Polr1c	Anapc4
	Aox3l1	Des	Gemin7	Ankle2
	Ctla4	Dnpep	Pole	Ankmy2
	Icos	Gmppa	Gemin6	Ankrd11
	Gpr1	Farsb	Glrx5	Ankrd17
	4933402D24Rik	Acsl3	Kif23	Ankrd49
	Crygb	Wdfy1	Sf3b4	Anln
	Crygd	Mrpl44	Sf3b3	Anp32b
	Crygc	Cul3	Polr1d	Anp32e
	Crygf	Mff	Sf3b2	Anxa7
	Tnp1	Cab39	Rft1	Ap1m1
	Fev	Psmd1	Grwd1	Ap2b1
	Cryba2	B3gnt7	Ppm1d	Ap2m1
	Ihh	Ncl	Dad1	Ap2s1
	Slc23a3	Ptma	Srfbp1	Ap3b1
	Resp18	Cops7b	Exosc10	Ap5z1
	Accn4	A730008H23Rik	Stip1	Apc
	Tmem198	Sh3bp4	Eprs	Apex1
	Kcne4	Cops8	Tamm41	Apex2
	Scg2	Ube2f	Rad9a	Api5
	Fam124b	Ilkap	Krr1	Apitd1
	Irs1	Ndufa10	Opa1	Apod
	Tm4sf20	Myeov2	Banf1	Apol7b
	Wdr69	Ppp1r7	Heatr1	Aprt
	Spata3	Pask	U2af1	Aqr
	Gpr55	2021-09-02	Pabpc1	Arcn1
	Htr2b	Hdlbp	Lamtor1	Arf1
	1700019O17Rik	Stk25	Racgap1	Arf6
	Akp3	Thap4	Usp5	Arfip2
	Chrng	Dtymk	Brap	Arglu1
	3110079O15Rik	Ing5	Snapc1	Arhgap19
	Kcnj13	Vps4b	Cenpe	Arhgap26
	Neu2	Mki67ip	Snapc5	Arhgef1
	Sag	Tsn	Rrp12	Arhgef15
	Heatr7b1	Tfcp2l1	Cenpm	Arhgef18
	Trpm8	Dbi	Skiv2l2	Arhgef2
	Glrp1	Ddx18	Cenpo	Arhgef7
	Prlh	Actr3	Cenpn	Arid1a
	Mlph	Ccnt2	Ppie	Arid2
	Ramp1	Rab3gap1	Gtf2a2	Arid4a
	Klhl30	Mcm6	Top2a	Arih1
	Espnl	Mapkapk2	Sdad1	Arl1
	Olfr1411	Dyrk3	Nfs1	Arl8b
	Olfr1414	Eif2d	Rabggta	Armc10
	Olfr1416	Rbbp5	Rcc1	Armc12
	Olfr1412	Mdm4	Bub3	Armc5
	Olfr1413	Ppp1r15b	Snrnp25	Armc7
	Olfr1415	Snrpe	Gtpbp4	Armcx1
	Olfr1410	Zbed6	Spdl1	Arpc2
	Olfr12	Btg2	Pdcd11	Arpc3
	Otos	Tmem183a	Ncbp1	Arpc4
	Gpr35	Cyb5r1	Hsd17b10	Arpp19
	Aqp12	Rabif	Ncbp2	Arrdc2
	2310007B03Rik	Klhl12	Srsf1	Asap2
	Agxt	Kdm5b	Mrto4	Ascc1
	Gal3st2	Ube2t	Rad54l	Ascc2
	Neu4	Arl8a	Cenpa	Ascc3
	Gm9994	Rnpep	Gtf2b	Ash2l
	Gm6086	Timm17a	Rad51	Asic5
	Serpinb5	Ipo9	Tubg1	Asna1
	Serpinb12	Csrp1	Chd8	Asns
	Serpinb13	Tmem9	Ciao1	Asnsd1
	Serpinb3d	Ddx59	Copb2	Asun
	Serpinb3a	Zfp281	Nelfb	Asxl2
	Serpinb3c	Aspm	Rrp36	Atad1
	Serpinb11	Uchl5	Tfb2m	Atad2
	Serpinb2	Tpr	Gtf3c4	Atad5
	Serpinb7	Ivns1abp	Gtf3c3	Atat1
	Serpinb8	Rnf2	Cnot3	Atf1
	Gm101	1190005F20Rik	Nedd8	Atf4
	Sctr	Tsen15	Usp39	Atf7ip
	C1ql2	Arpc5	Fau	Atg12
	Marco	Smg7	Cdc7	Atg14
	En1	Lamc1	Hnrnpl	Atic
	Htr5b	Npl	Brf1	Atl2
	Ysk4	Glul	Nus1	Atm
	Lct	Tor1aip2	Hist1h3f	Atmin
	C4bp	Mrps14	Trmt112	Atoh1
	Fcamr	Dars2	Nhp2	Atp12a
	Pigr	Prdx6	Med21	Atp13a1
	Il20	Mettl13	Ppp1r12a	Atp1a1
	Il24	BC055324	Rpp21	Atp2a3
	Il19	Slc19a2	Coa5	Atp2b1
	Il10	Atp1b1	Rpa1	Atp4b
	Avpr1b	Tiprl	Rpa2	Atp5d
	Slc26a9	Brp44	Gpn2	Atp5e
	5430435G22Rik	Mpzl1	Prim2	Atp5f1
	Klhdc8a	Gpa33	Plk1	Atp5g1
	Kiss1	Mgst3	Rad1	Atp5g2
	Ren1	Aldh9a1	Cox7b	Atp5g3
	Golt1a	Dusp12	Rtel1	Atp5h
	Optc	Sdhc	Wbscr16	Atp5j
	Prelp	Nit1	Gfm1	Atp5k
	Fmod	Ndufs2	Erh	Atp5l
	Adora1	Dedd	Tma16	Atp5o
	Myog	Ufc1	Rpa3	Atp5sl
	Gpr37l1	Usp21	Prpf8	Atp6ap1
	Pkp1	B4galt3	Dpagt1	Atp6v0b
	Gpr25	Usf1	Sumo2	Atp6v0d1
	Atp6v1g3	F11r	Kars	Atp6v1b2
	Lhx9	Ncstn	Mrpl4	Atp6v1c1
	F13b	Copa	Atad3a	Atp6v1d
	Cfhr1	Dcaf8	Pou5f1	Atp6v1e1
	Cfh	Tagln2	Trappc1	Atp6v1f
	Rgs1	Fh1	Serf2	Atp6v1g1
	Rgs18	Exo1	Sars	Atp6v1h
	Apobec4	Pppde1	Fntb	Atpaf2
	Rgs8	Hnrnpu	Mms19	Atr
	Rgsl1	Fam36a	Chaf1b	Atrip
	5830403L16Rik	Tfb2m	Arfrp1	Atrx
	Teddm1	Sccpdh	Polg2	Atxn10
	Gm5531	Ahctf1	Iscu	Atxn2l
	Zfp648	Adck3	Utp11l	Atxn7l3
	Mr1	Parp1	Aamp	AU019823
	Lhx4	Acbd3	Gnl2	AU021092
	Nphs2	Lefty2	Tut1	Aup1
	Angptl1	H3f3a	Arl2	Aurka
	Sec16b	Pycr2	Aasdhppt	Aurkaip1
	Tnn	BC031781	Rangap1	AY761184
	Gpr52	Ephx1	Mdm4	Aym1
	4930469G21Rik	Lefty1	Dhx16	Azi2
	Tnfsf4	Nvl	N6amt1	Azin1
	Tnfsf18	Cnih4	Fam96b	B3galt6
	Fasl	Srp9	Rpl7a	B3gat3
	4930558K02Rik	Fbxo28	Bccip	B3gnt2
	Myoc	Degs1	Ppp2r1a	B3gnt5
	7420461P10Rik	Iars2	Hcfc1	B430306N03Rik
	Fmo4	Eprs	Ndufab1	B4galt1
	Fmo2	Rrp15	Rps4x	B4galt7
	Fmo1	Kctd3	Dhx29	B9d1
	Fmo6	Angel2	Pole2	Babam1
	4921528O07Rik	Dtl	Ssu72	Bad
	Prrx1	Ints7	Rplp0	Banp
	Mettl11b	Nek2	Ppil4	Bap1
	Sell	Diexf	H2afz	Bard1
	Sele	Cr1l	Zc3h8	BC003965
	Dpt	Hnrnpa3	Ppil2	BC005624
	Xcl1	Eng	Sys1	BC018507
	Tbx19	Fubp3	Magoh	BC030867
	Adcy10	Gapvd1	Cdca8	BC031181
	Gm4847	Slc12a6	Pno1	BC049762
	Fmo9	Rtf1	Urod	BC052040
	Lrrc52	Cds2	Aldoa	BC055324
	Rgs4	Crnkl1	Pomp	BC061237
	Rgs5	Zmynd8	Pwp2	BC107364
	1700084C01Rik	Hspa14	Atp6v1a	BC147527
	Sh2d1b1	Phyh	Rbx1	Bcap29
	Sh2d1b2	Nudt5	Exosc4	Bcas2
	1700015E13Rik	Upf2	Tcp1	Bcl2l1
	Fcrla	Fam188a	Exosc3	Bclaf1
	Fcrlb	Fbxo18	Dhx33	Bcor
	Fcgr4	Vim	Dis3	Bcs1l
	Fcgr3	Rsu1	Phb2	Bdh1
	Pcp4l1	Stam	Smc6	Bdp1
	Cd244	Mllt10	Smc2	Becn1
	Itln1	Etl4	Pop7	Bet1
	Ly9	Arhgap21	Zfp574	Birc6
	Cd48	Abi1	Smc4	Blm
	Slamf7	Ehmt1	Smc3	Bloc1s1
	Slamf1	Spna2	Eif4a1	Bloc1s2
	Slamf6	Rapgef1	Nvl	Bloc1s4
	Nhlh1	Odf2	Chchd4	Bms1
	Kcnj9	Ppp2r4	Naa20	Bnip1
	Slamf8	Nup188	Naa25	Bnip3
	Fcrl6	Mettl11a	Pnkp	Bola3
	Dusp23	Ass1	Slc25a26	Bop1
	Crp	Fnbp1	Fxn	Bpgm
	Apcs	Gpr107	Slc25a28	Bpifa6
	Olfr16	Nup214	Txnl4a	Bpifb9b
	Olfr1408	Abl1	Letm1	Bptf
	Gm11062	Uck1	Atp6v0c	Braf
	Olfr1404	Fam129b	Snrpg	Brat1
	Olfr418-ps1	Mapkap1	Pold2	Brca2
	Olfr1406	Cep110	Snrpf	Brd1
	Fcer1a	Rabgap1	Nup205	Brd2
	Olfr218	Nek6	Mcm4	Brd4
	Darc	Nr6a1	Lsg1	Brd8
	BC094916	Ppp6c	Mcm6	Brf2
	Pydc4	Orc4	Gins3	Bri3
	Pyhin1	Stam2	Ndufa1	Brip1
	Pydc3	Gpd2	Ndufa2	Brix1
	AI607873	Pkp4	Gnb1l	Brms1
	Ifi204	Tanc1	Ndufa8	Brpf1
	Mndal	Rbms1	Sarnp	Btaf1
	Ifi203	Ly75	Rfwd3	Btbd6
	Mnda	Psmd14	Psmc1	Btbd9
	Olfr429	Gca	Psmc2	Btf3
	Olfr430	Ubr3	Vps72	Bub1
	Olfr432	Slc25a12	Rpl35a	Bub1b
	Olfr433	Dcaf17	Mcat	Bud13
	Ifi205	Tlk1	Psmc6	Bud31
	Olfr421-ps1	Gorasp2	Prmt5	Bysl
	Olfr424	Ola1	Thoc3	Bzw1
	Olfr420	Cir1	Bora	Bzw2
	Olfr231	Atf2	Rps20	C030046E11Rik
	1810030J14Rik	Mtx2	Brca1	C130026I21Rik
	Olfr419	Agps	Rps21	C1d
	Olfr248	Nckap1	Rps26	C1qbp
	Olfr220	Zc3h15	Xab2	C1rb
	Olfr417	Zdhhc5	Prpf31	C330021F23Rik
	Olfr414	Tfpi	Ykt6	C330027C09Rik
	Kmo	Mtch2	Lig3	C87414
	1700016C15Rik	Celf1	Psmd4	Cab39
	6330403A02Rik	Nup160	Psmd6	Cacna1e
	Ccdc121	Ambra1	Psmd8	Cactin
	Vmn1r1	Alkbh3	Lonp1	Cacul1
	4922505E12Rik	Ext2	Adat3	Cad
	Hlx	Hsd17b12	Lsm7	Caml
	Mosc1	Ldlrad3	Atp2a2	Camsap3
	Prox1	Trim44	Pcna	Cand1
	Fam71a	Pdhx	Tars2	Cap1
	Rd3	Cstf3	Dut	Caprin1
	Traf3ip3	Immp1l	Nxf1	Capzb
	Hsd11b1	Lgr4	Psma5	Car11
	Camk1g	Aven	Psma6	Carm1
	Lrp1b	Atpbd4	Psma4	Cars2
	Ccdc148	BC052040	Hscb	Casc5
	4930525F21Rik	Eif2ak4	Anapc5	Casp8ap2
	Cacnb2	1500003O03Rik	Rpl19	Cbfa2t2
	4931423N10Rik	Ino80	Rpl18	Cbl
	Ttll11	Casc5	Rpl17	Cbwd1
	Arhgap15	Tmem87a	Cdipt	Cbx1
	Galnt13	Ehd4	Anapc1	Cbx2
	Cacnb4	Adal	Ftsj3	Cbx3
	Kcnh7	Ubr1	Rpl14	Cbx7
	Myo3b	Pdia3	Rpl13	Ccar1
	Pde1a	Spg11	Rpl10	Ccdc101
	Tmc2	Gabpb1	Eef1a1	Ccdc105
	Sptlc3	Anapc1	Mtg1	Ccdc110
	Bpifb9b	Stk35	Mtg2	Ccdc115
	Ptprt	Ckap2l	Ccnh	Ccdc12
	Gm14288	Fastkd5	Rbm8a	Ccdc124
	0610010B08Rik	Ptpra	Rpl37a	Ccdc130
	Olah	Mcm8	Dhx8	Ccdc137
	Itih5	Mkks	Psmb4	Ccdc155
	Prkcq	Esf1	Rpl36a	Ccdc174
	Armc3	Dtd1	Psmb6	Ccdc22
	4921504E06Rik	Rrbp1	Psmb7	Ccdc59
	Gpr158	Acss1	Psmb1	Ccdc7
	Gad2	Nanp	Psmb2	Ccdc83
	Myo3a	Hck	Alg2	Ccdc84
	Apbb1ip	Tpx2	Psmb3	Ccdc86
	Nxph2	Dnmt3b	Narfl	Ccdc88c
	Ntng2	Asxl1	Mettl16	Ccdc90b
	Lmx1b	Cbfa2t2	BC027231	Ccdc94
	1700019L03Rik	Raly	Rfc5	Ccdc97
	Hc	Uqcc	Ruvbl2	Cchcr1
	Kynu	Rbm39	Rps12	Ccl1
	Lypd6b	Phf20	Emg1	Ccl19
	Acvr1c	Dlgap4	Rps18	Ccl21a
	Itgb6	Rbl1	Wdr75	Ccl27a
	Pla2r1	Ndrg3	Rps19	Ccl27b
	Fap	Ctnnbl1	Cdc73	Ccna2
	Slc4a10	Snhg11	Rps14	Ccnb1
	Fign	Tti1	Atp5c1	Ccnb2
	Scn2a1	Plcg1	Rps15	Ccnc
	Scn1a	Stk4	Ppp2ca	Ccnd3
	Scn7a	Ywhab	Nat10	Ccne1
	4932414N04Rik	Elmo2	Rpl35	Ccnf
	Hoxd3	Sulf2	Rrm1	Ccng1
	Pde11a	Ddx27	Nsa2	Ccnk
	Gm14461	Dnajc5	Nrf1	Ccnl1
	Ppp1r1c	Nmt2	Ndnl2	Ccnl2
	Itga4	Rpp38	Nob1	Ccnt1
	Zfp804a	Suv39h2	Tipin	Ccnt2
	4833423E24Rik	Prpf18	Fcf1	Ccr1l1
	Lrrc4c	Sephs1	Clp1	Ccr4
	Slc1a2	Mcm10	Rpl31	Ccs
	Elf5	Cdc123	Rpl24	Cct3
	D430041D05Rik	Sec61a2	Ncapd3	Cct7
	0610012H03Rik	Dhtkd1	Cct5	Cct8
	Disp2	Atp5c1	Rpl26	Cd209g
	Epb4.2	Rbm17	Cct4	Cd2bp2
	Slc12a1	Commd3	Mrps34	Cd300lh
	Slc24a5	Pdss1	Rpl29	Cd34
	Atp8b4	Yme1l1	Zbtb8os	Cd3eap
	Hao1	Mastl	Dnajc11	Cdan1
	Sel1l2	Zmynd19	Ssbp1	Cdc16
	Pcsk2	Ndor1	Ell	Cdc23
	Slc24a3	Ssna1	Tomm22	Cdc25a
	Pax1	Anapc2	Rpf1	Cdc26
	Scrt2	Tubb4b	Atp5a1	Cdc40
	Defb36	Cobra1	Supv3l1	Cdc42
	Bpifb3	Dpp7	Qrsl1	Cdc45
	Ghrh	Uap1l1	Rpusd4	Cdc5l
	Jph2	Man1b1	Rps15a	Cdc6
	Tox2	Edf1	Eef1e1	Cdca2
	Rbpjl	Phpt1	Birc5	Cdca3
	Wfdc11	B230208H17Rik	Wdr43	Cdca4
	Svs4	Ubac1	Wdr48	Cdca5
	Eya2	Sdccag3	Cct2	Cdh1
	Slc13a3	Sec16a	Rpl23a	Cdh11
	Tshz2	Snapc4	Mecr	Cdh26
	Dok5	Pmpca	Cars	Cdk10
	Cass4	Egfl7	Cox15	Cdk11b
	Edn3	Agpat2	Socs3	Cdk12
	Gm14391	Surf4	Znrd1	Cdk2
	Myt1	Surf2		Cdk2ap1
	Meig1	Surf6		Cdk2ap2
	Ucma	Rpl7a		Cdk4
	Gata3	Surf1		Cdk6
	Itih2	Rexo4		Cdk8
	Il15ra	Brd3		Cdpf1
	Il2ra	Wdr5		Cds2
	C1ql3	Mrps2		Cdt1
	Tmem236	Gtf3c5		Cdv3
	Slc39a12	Tsc1		Cdyl2
	H2afb1	Gtf3c4		Cebpg
	BC061194	Ttf1		Cebpz
	Ptf1a	Setx		Celf1
	Tbpl2	Urm1		Cenpc1
	Hnmt	Trub2		Cenph
	Il1f8	Gle1		Cenpi
	Il1f6	Set		Cenpj
	Il1f10	Tbc1d13		Cenpk
	Il1f5	D2Wsu81e		Cenpl
	Il1rn	Tor1a		Cenpp
	Noxa1	BC005624		Cenpq
	Entpd8	Tor1b		Cenpt
	Lrrc26	Exosc2		Cenpu
	E130003G02Rik	Prrc2b		Cenpw
	Tmem210	Swi5		Cep120
	Fut7	Dpm2		Cep152
	Clic3	Cdk9		Cep192
	Lcn12	Tor2a		Cep350
	Lcn13	Fpgs		Cep57
	Lcn5	Rpl12		Cep85
	Lcn8	Fbxw2		Cep95
	Fcna	Hspa5		Cept1
	Lcn10	Psmd5		Ces1d
	4921530D09Rik	Rabepk		Cfap20
	Lcn6	Rab14		Cfap221
	Lcn11	Ndufa8		Chaf1a
	Lcn3	Rbm18		Champ1
	Lcn14	Pdcl		Chchd1
	Lcn9	Psmb7		Chchd2
	Glt6d1	Rpl35		Chchd3
	Sohlh1	Arpc5l		Chchd5
	Lhx3	Mmadhc		Chd1
	4932418E24Rik	Rif1		Chd4
	Lcn4	Arl5a		Chek1
	Adamts13	Arl6ip6		Cherp
	Gm711	Prpf40a		Chi3l3
	Tmem8c	2021-03-07		Chmp1a
	Adamtsl2	Spc25		Chmp2a
	Dbh	Ppig		Chmp3
	Sardh	Fastkd1		Chmp4b
	Fcnb	Ssb		Chmp5
	Cel	Mettl5		Chmp6
	Gfi1b	Phospho2		Chmp7
	Barhl1	Mettl8		Chordc1
	Gm13547	Dync1i2		Chp1
	Cstad	Hat1		Chtf18
	Prdm12	Itga6		Chtf8
	Fibcd1	Pdk1		Chtop
	Qrfp	Cdca7		Ciapin1
	Lamc3	Sp3		Ciart
	Lcn2	Atp5g3		Cic
	6330409D20Rik	Nfe2l2		Cinp
	4930568D16Rik	Rbm45		Cir1
	4930402F06Rik	Prkra		Cirbp
	Olfr339	Plekha3		Cirh1a
	Olfr338	Cwc22		Cisd1
	Olfr341	Ube2e3		Cited2
	Olfr342	Dnajc10		CK137956
	Olfr344	Nup35		Ckap5
	Olfr340	Ctnnd1		Cks1b
	Olfr345	Tmx2		Cks2
	Olfr346	2700094K13Rik		Clasp2
	Olfr347	Med19		Clasrp
	Olfr50	Timm10		Clcc1
	Olfr348	Clp1		Clcn6
	Olfr3	Ssrp1		Cldn18
	Olfr356	Fnbp4		Clec4a2
	Olfr350	Ndufs3		Clic4
	Olfr355	Psmc3		Clip3
	Olfr351	Ddb2		Clmp
	Olfr353	Arfgap2		Cln8
	Olfr354	Ckap5		Clnk
	Olfr352	Atg13		Clns1a
	Olfr357	Arhgap1		Clpb
	Olfr360	Dgkz		Clpp
	Olfr361	Mdk		Clpx
	Olfr358	Trp53i11		Clspn
	Olfr362	Accsl		Clta
	Olfr365	Api5		Cltc
	Olfr366	Apip		Cluh
	Olfr368	Cat		Cma2
	Olfr367-ps	Nat10		Cmc2
	Gpr21	Caprin1		Cmip
	Lhx2	Fbxo3		Cml1
	Nr5a1	Depdc7		Cmpk1
	Wdr38	Eif3m		Cmtm2b
	Gm13476	Rcn1		Cmtr1
	Tas2r134	Dnajc24		Cmtr2
	Galnt5	2700007P21Rik		Cnn3
	Ermn	Kif18a		Cnot1
	Cytip	Lin7c		Cnot10
	Upp2	Nop10		Cnot11
	Dapl1	2900064A13Rik		Cnot2
	Tbr1	2410042D21Rik		Cnot4
	Gcg	Tmem85		Cnot8
	Ifih1	Arhgap11a		Cnppd1
	Slc38a11	Aqr		Cntrob
	Gm1322	Spred1		Coa3
	Xirp2	Fam98b		Coa4
	4933409G03Rik	Srp14		Coa6
	Abcb11	Bub1b		Coa7
	Dhrs9	Ivd		Cog1
	Kbtbd10	D2Ertd750e		Cog2
	Sp5	Rad51		Cog3
	4933404M02Rik	Spint1		Cog4
	Dlx2	Chac1		Cog5
	Dlx1	Nusap1		Cog6
	Sp9	Oip5		Cog7
	Chrna1	Ndufaf1		Cog8
	Hoxd9	Rpap1		Coil
	Hoxd10	Tyro3		Commd3
	Hoxd4	Mga		Commd4
	Evx2	Vps39		Commd5
	Hoxd12	Haus2		Comtd1
	Hoxd11	Zfp106		Copa
	Dfnb59	Snap23		Copb1
	Prdx6b	Lrrc57		Cope
	Frzb	Ccndbp1		Copg1
	Zswim2	Tubgcp4		Cops3
	Calcrl	Ckmt1		Cops4
	Ypel4	Serf2		Cops5
	Rtn4rl2	Ell3		Cops6
	Prg3	2310003F16Rik		Cops8
	Prg2	Wdr76		Copz1
	Aplnr	Casc4		Coq10b
	Lrrc55	Ctdspl2		Coq2
	Olfr987	Eif3j		Coq3
	Olfr988	B2m		Coq4
	Olfr992	Sord		Coq5
	Olfr993	Pldn		Coq6
	Olfr995	Myef2		Coq7
	Olfr994	Dut		Coro1c
	Olfr996	Cops2		Cox10
	Olfr998	Dtwd1		Cox11
	Olfr1000	Usp8		Cox14
	Olfr1002	Trpm7		Cox16
	Olfr1009	Ncaph		Cox17
	Olfr1008	Snrnp200		Cox18
	Olfr1006	Stard7		Cox19
	Olfr154	Ciao1		Cox20
	Olfr1013	Mrps5		Cox4i1
	Olfr1022	Bub1		Cox5a
	Olfr1015	Polr1b		Cox5b
	Olfr1018	Chchd5		Cox6a1
	Olfr1020	Slc20a1		Cox6b1
	Olfr1014	Snrpb		Cox6c
	Olfr1010	Idh3b		Cox7c
	Olfr1019	Nop56		Cpox
	Olfr1012	Vps16		Cpsf1
	Olfr1016	Mrps26		Cpsf4
	Olfr1028	Itpa		Cpsf6
	Olfr1023	Slc4a11		Cr1l
	Olfr1026	1700037H04Rik		Crb3
	Olfr1032	Cdc25b		Crcp
	Olfr1030	Pank2		Crebbp
	Olfr1029	Slc23a2		Crkl
	Olfr1031	5730494N06Rik		Crocc
	Olfr1024	Pcna		Crtc2
	Olfr1033	Trmt6		Crybb2
	Olfr1038-ps	Crls1		Cryge
	Olfr1036	Snrpb2		Cs
	Olfr1039	Dstn		Cse1l
	Olfr1037	8430406I07Rik		Csf1
	Olfr1034	Snx5		Csk
	Olfr1042	Csrp2bp		Csnk2b
	Olfr1047	Sec23b		Csrnp1
	Olfr52	Rbbp9		Csrp2bp
	Olfr1046	Gm561		Cstb
	Olfr1044	Naa20		Cstf1
	Olfr1043	Xrn2		Cstf2
	Olfr1040	Nxt1		Cstf3
	Olfr1049	Gzf1		Ctbp2
	Olfr1048	Cst3		Ctc1
	Olfr1045	Entpd6		Ctcf
	Olfr1053	Abhd12		Ctdp1
	Olfr1052	Gins1		Ctdsp1
	Olfr1056	Fkbp1a		Ctdsp2
	Olfr1058	Nsfl1c		Ctdspl2
	Olfr1057	Psmf1		Ctnna1
	Olfr1054	Srxn1		Ctnnb1
	Olfr1055	Tcf15		Ctnnbl1
	Olfr1051	Tbc1d20		Ctnnd1
	Olfr1062	Csnk2a1		Ctps
	Olfr1066	Rbck1		Ctr9
	Olfr1065	Mcts2		Ctrc
	Olfr1061	Pdrg1		Ctu1
	Olfr228	Tm9sf4		Ctu2
	Olfr1076	Mapre1		Cul1
	Olfr1085	Cdk5rap1		Cul2
	Olfr1080	E2f1		Cul4b
	Olfr1079	Chmp4b		Cwc15
	Olfr1084	Eif2s2		Cwc22
	Olfr1082	Ahcy		Cwc25
	Olfr1086	Itch		Cwf19l1
	Olfr1090	Dynlrb1		Cwf19l2
	Olfr1087	Map1lc3a		Cxcl3
	Olfr1093	Pigu		Cxxc1
	Olfr1089	Ncoa6		Cxxc4
	Olfr141	Gss		Cyb5r4
	Olfr1098	Acss2		Cyc1
	Olfr1097	Edem2		Cycs
	Olfr1094	Trpc4ap		Cyct
	Olfr1095	Eif6		Cyfip1
	Olfr1099	Ergic3		Cyp11b1
	Olfr1104	Cpne1		Cyp2d40
	Olfr1106	Nfs1		Cyp3a41a
	Olfr1100	Tgif2		Cyp4f16
	Olfr1101	1110008F13Rik		D10Wsu102e
	Olfr1105	Dsn1		D10Wsu52e
	Olfr1102	Samhd1		D14Abb1e
	Olfr1110	Rpn2		D17Wsu92e
	Olfr259	Manbal		D19Bwg1357e
	Olfr1109	Blcap		D2hgdh
	Olfr1107	Rprd1b		D830030K20Rik
	Olfr1111	Tgm2		D8Ertd738e
	Olfr1113	Ralgapb		Dap3
	Olfr1112	Dhx35		Dars
	Olfr1115	Top1		Dars2
	Olfr1118	Srsf6		Daxx
	Olfr1116-ps	Gtsf1l		Dazap1
	Olfr1121	Ift52		Dazl
	Olfr1120	Mybl2		Dbpht2
	Olfr1124	3230401D17Rik		Dbr1
	Olfr1122	Serinc3		Dcaf13
	Olfr1123	Tomm34		Dcaf15
	Olfr1129	Pigt		Dcaf7
	Olfr1126	Sdc4		Dclre1b
	Olfr1128	Wfdc2		Dcp2
	Olfr1135	Dnttip1		Dcps
	Olfr1133	Ube2c		Dcstamp
	Olfr1134	Pltp		Dctn1
	Olfr1130	Zswim1		Dctn3
	Olfr1136	Ctsa		Dctn4
	Olfr1131	Ncoa3		Dctn5
	Olfr1137	Arfgef2		Dctn6
	Olfr1132	Stau1		Dcun1d3
	Olfr1141	Cse1l		Dda1
	Olfr1145	1500012F01Rik		Ddi2
	Olfr152	Rnf114		Ddost
	Olfr1140	Ube2v1		Ddx1
	Olfr1138	Adnp		Ddx10
	Olfr1143	Dpm1		Ddx11
	Olfr1148	Sall4		Ddx17
	Olfr1152	Zfp217		Ddx18
	Olfr74	Pfdn4		Ddx19a
	Olfr1156	Cstf1		Ddx20
	Olfr1157	Aurka		Ddx23
	Olfr1155	2410001C21Rik		Ddx24
	Olfr1153	Rae1		Ddx27
	Olfr1151	Rbm38		Ddx28
	Olfr1154	Rab22a		Ddx31
	Olfr1162	Vapb		Ddx39
	Olfr73	Stx16		Ddx39b
	Olfr1161	Gnas		Ddx3x
	Olfr1163	Th1l		Ddx41
	Olfr1164	Ctsz		Ddx42
	Olfr1160	Slmo2		Ddx46
	Olfr1158	Atp5e		Ddx49
	Olfr1170	Gm14393		Ddx5
	Olfr1168	Gm14295		Ddx51
	Olfr1167	Etohi1		Ddx52
	Olfr1166	Psma7		Ddx54
	Olfr1173	Lsm14b		Ddx55
	Olfr1176	Lama5		Ddx59
	Olfr1184	Adrm1		Ddx6
	Olfr1180	Osbpl2		Deb1
	Olfr1181	Rps21		Defa25
	Olfr1183	2310003C23Rik		Defa26
	Olfr1179	Dido1		Defb37
	Olfr1178	Tcfl5		Degs1
	Olfr1182	Ythdf1		Denr
	Olfr1188	Ppdpf		Derl1
	Olfr1186	Rtel1		Det1
	Olfr1189	Tpd52l2		Dgcr14
	Olfr1196	Prpf6		Dgcr8
	Olfr1199	Rgs19		Dhdds
	Olfr1198	Pcmtd2		Dhfr
	Olfr1195	Polr3k		Dhodh
	Olfr1193	Rsrc1		Dhrs7b
	Olfr1197	Iqcj		Dhx15
	Olfr1204	Golph3l		Dhx30
	Olfr1202	Snx27		Dhx35
	Olfr1205	Tet2		Dhx36
	Olfr1201	Nfkb1		Dhx37
	Olfr1200	Usp33		Dhx38
	Olfr1206	Mrps28		Diap1
	Olfr1209	Stmn2		Dicer1
	Olfr1214	Pde7a		Dido1
	Olfr1211	Ect2		Diexf
	Olfr1217	Rpl22l1		Dimt1
	Olfr1208	Lrrc34		Dis3l
	Olfr1212	Prkci		Dlc1
	Olfr1216	Zmat3		Dld
	Olfr1213	Ndufb5		Dlg1
	Olfr1215	Fxr1		Dlg4
	Olfr1221	Spata5		Dlg5
	Olfr1220	Larp1b		Dlgap5
	Olfr1223	Phf17		Dll1
	Olfr1218	Naa15		Dlst
	Olfr1219	Rnf13		Dmap1
	Olfr1222	Serp1		Dmtf1
	Olfr1226	Mme		Dnaaf5
	Olfr1228	Gfm1		Dnaja1
	Olfr1229	Smc4		Dnaja2
	Olfr1225	Etfdh		Dnajb6
	Olfr1239	Fnip2		Dnajc13
	Olfr1232	Fbxw7		Dnajc15
	Olfr1233	Dclk2		Dnajc17
	Olfr1230	Prcc		Dnajc2
	Olfr1238	Dap3		Dnajc24
	Olfr1234	Pmf1		Dnajc8
	Olfr1231	Adar		Dnajc9
	Olfr1243	2500003M10Rik		Dnlz
	Olfr1240	Setdb1		Dnm1l
	Olfr1242	Pip5k1a		Dnm2
	Olfr1241	Arnt		Dnmt1
	Olfr1250	Tars2		Dnttip1
	Olfr1249	Chd1l		Dnttip2
	Olfr1246	Vangl1		Dock1
	Olfr1248	Trim33		Dolpp1
	Olfr1245	Rhoc		Donson
	Olfr1247	Hbxip		Dpf2
	Olfr1251	Ahcyl1		Dph1
	Olfr1252	Dph5		Dph2
	Olfr1254	Abcd3		Dph3
	Olfr1253	Fnbp1l		Dph5
	Olfr1255	Bcar3		Dppa4
	Olfr1259	Mettl14		Dpy30
	Olfr48	Ap1ar		Dr1
	Olfr1258	Elovl6		Dram2
	Olfr1256	Sec24b		Drap1
	Olfr1257	Hadh		Drg1
	Olfr1262	Ppa2		Drg2
	Olfr1265	Ppp3ca		Drosha
	Olfr140	Metap1		Dscc1
	Olfr1261	Rap1gds1		Dsn1
	Olfr1263	Pkn2		Dtl
	Olfr1260	Pdlim5		Dtymk
	Olfr1264	Hs2st1		Dusp12
	Olfr32	Ddah1		Dusp23
	Olfr1270	Prkacb		Dusp5
	Olfr1269	Cryz		Dym
	Olfr1273-ps	Srsf11		Dync1h1
	Olfr1506	Tpd52		Dync1i2
	Olfr1271	Fabp5		Dynll1
	Olfr1272	Zfand1		Dynlrb1
	Olfr142	Impa1		Dynlt1a
	Olfr1274-ps	Chmp4c		Dynlt1b
	C1qtnf4	1810022K09Rik		Dynlt1c
	1700029I15Rik	E2f5		Dynlt1f
	Chst1	Car2		Dyrk1a
	Alx4	Ythdf3		E130309D02Rik
	Gm13889	Mtfr1		E2f3
	Rag1	Armc1		E2f4
	Rag2	Hltf		E2f6
	Cd44	Mynn		E4f1
	Ehf	Sec62		Eaf1
	A930018P22Rik	Skil		Eapp
	Pin1-ps1	Zfp639		Ear2
	Fshb	Mfn1		Ears2
	Kcna4	Actl6a		Ebna1bp2
	Bdnf	Mrpl47		Ecd
	Fibin	Ttc14		Echs1
	Bbox1	Dnajc19		Edc4
	Slc5a12	Sox2		Edrf1
	Muc15	Atp11b		Eed
	Olfr1275	Mccc1		Eef1g
	4930430A15Rik	Acad9		Eefsec
	Olfr1277	Exosc9		Efr3a
	Olfr1276	Ccna2		Eftud1
	Olfr1279	Plk4		Eftud2
	Olfr1278	Pgrmc2		Egr1
	Olfr1280	Ccrn4l		Ehmt1
	Olfr1282	Ndufc1		Ehmt2
	Olfr1284	4930583H14Rik		Ei24
	Olfr1283	Rab33b		Eif1
	Olfr1286	Cog6		Eif1ad
	Olfr1281	Fam48a		Eif2ak4
	Olfr1287	Exosc8		Eif2b1
	Olfr1288	Alg5		Eif2b3
	Olfr1294	Sohlh2		Eif2s1
	Olfr1289	Commd2		Eif2s2
	Olfr1295	2810407C02Rik		Eif2s3x
	Olfr1290	Eif2a		Eif3b
	Olfr1299	Dhx36		Eif3c
	Olfr1297	Gmps		Eif3e
	Olfr1298	Ssr3		Eif3g
	Olfr1302	Tiparp		Eif3h
	Olfr1301	Ccnl1		Eif3j1
	Olfr1303	Mfsd1		Eif3j2
	Olfr1306	Ift80		Eif3k
	Olfr1305	Kpna4		Eif3l
	Olfr1308	Trim59		Eif3m
	Olfr1307	B3galnt1		Eif4a3
	Olfr1314	Nmd3		Eif4b
	Olfr1309	Pdcd10		Eif4e
	Olfr1311	Ppid		Eif4e2
	Olfr1313	Plrg1		Eif4enif1
	Olfr1312	Mnd1		Eif4g1
	Olfr1310	Arfip1		Eif4g2
	Olfr1316	Pet112l		Eif5
	Olfr1317	Rps3a		Eif5a
	Olfr1318	Sh3d19		Eif5b
	BC125332	Hdgf		Elac2
	Chrm5	Mrpl24		Elavl1
	Tmco5b	Isg20l2		Elmsan1
	Grem1	Apoa1bp		Elof1
	Actc1	Iqgap3		Elp2
	Gjd2	0610031J06Rik		Elp4
	Tmco5	Cct3		Elp5
	Gpr176	Smg5		Emc1
	Plcb2	Arhgef2		Emc2
	Phgr1	Ubqln4		Emc3
	Gm1337	Lamtor2		Eml3
	Gm14137	Ssr2		Enkd1
	Dll4	2810403A07Rik		Eno1
	Pla2g4d	Msto1		Eny2
	Tgm7	Fdps		Ep300
	Tgm5	Scamp3		Ep400
	Strc	Clk2		Epb4.1l5
	Serinc4	Mtx1		Ept1
	Mageb3	Krtcap2		Eras
	Trim69	Slc50a1		Ercc1
	Duoxa2	Gba		Ercc2
	Duox2	Shc1		Ercc3
	Slc28a2	Pygo2		Ercc4
	Gm14085	Cks1b		Ercc5
	Sema6d	Pmvk		Ercc6l
	Ctxn2	Ube2q1		Erf
	Shc4	Ubap2l		Ergic2
	Fgf7	Tpm3		Eri1
	Adra2b	Hax1		Erich1
	Astl	4933434E20Rik		Ermp1
	Prom2	Gm9846		Esco2
	Il1a	Jtb		Esd
	Il1b	Gatad2b		Esf1
	F830045P16Rik	Ilf2		Espl1
	Tgm6	Ints3		Esrrb
	Tmem239	Snapin		Etfa
	1700020A23Rik	S100a6		Etfdh
	Avp	S100a11		Etnk1
	Oxt	S100a10		Etohi1
	Siglec1	Mrpl9		Etv6
	Hspa12b	Pogz		Ewsr1
	Adra1d	Psmb4		Exo1
	Erv3	Pi4kb		Exoc1
	Prnd	Psmd4		Exoc2
	Prokr2	Scnm1		Exoc3
	Chgb	Gabpb2		Exoc4
	6330527O06Rik	Vps72		Exoc5
	Ism1	Cdc42se1		Exoc6
	Otor	Fam63a		Exoc7
	Banf2	Lass2		Exoc8
	Gm5535	Prune		Exosc1
	1700010M22Rik	Hormad1		Exosc2
	Gm14092	Mcl1		Exosc5
	4930529M08Rik	Ensa		Exosc6
	Insm1	Mrps21		Exosc7
	Nkx2-4	Prpf3		Exosc8
	Nkx2-2	Aph1a		Exosc9
	Sstr4	Anp32e		Ext1
	Thbd	BC028528		Ext2
	Cd93	Sf3b4		Extl3
	Cst11	Rbm8a		Ezh2
	Cstl1	Txnip		F8a
	Cst8	Polr3gl		Faf2
	Cst12	Rnf115		Fam102a
	8030411F24Rik	Polr3c		Fam103a1
	9230104L09Rik	Acp6		Fam109a
	Cst13	Sec22b		Fam122a
	Cst9	Phgdh		Fam129b
	Cst10	Wdr3		Fam136a
	Cst7	Ttf2		Fam154a
	Gm14151	Ptgfrn		Fam171b
	4921509C19Rik	Atp1a1		Fam178a
	Snph	Csde1		Fam187b
	Rad21l	Sike1		Fam204a
	5430405G05Rik	Nras		Fam207a
	Angpt4	Bcas2		Fam208a
	Defb23	Dennd2c		Fam210a
	Defb21	Slc16a1		Fam219b
	Defb19	Ppm1j		Fam229a
	Defb45	Mov10		Fam3c
	Defb28	Capza1		Fam50a
	Defb26	Ddx20		Fam57b
	Defb22	Rap1a		Fam58b
	Rem1	Wdr77		Fam60a
	Foxs1	Atp5f1		Fam73b
	Mylk2	Dram2		Fam92a
	Bpifb2	Cept1		Fam96a
	Sun5	Fam40a		Fam98a
	Bpifb6	Gstm5		Fam98b
	Bpifa2	Gstm2		Fanca
	Bpifa6	Gstm1		Fancb
	Bpifa1	Gnai3		Fancc
	Bpifa3	Ampd2		Fancd2
	Bpifa5	Psma5		Fance
	Bpifb9a	Psrc1		Fancf
	Bpifb1	Sars		Fancg
	1700007I08Rik	Taf13		Fanci
	1700003F12Rik	Clcc1		Fancm
	a	Gpsm2		Fasn
	Fam83c	Prpf38b		Fastkd1
	Gdf5	Rnpc3		Fastkd3
	Scand1	Dbt		Fastkd5
	Sla2	Rtcd1		Fbln5
	Gm1332	Hiat1		Fbxl4
	Vstm2l	Frrs1		Fbxo3
	Adig	Cnn3		Fbxo34
	Gm826	Dnttip2		Fbxo46
	Mafb	Gclm		Fbxo5
	Wisp2	1810037I17Rik		Fbxw11
	Kcnk15	Larp7		Fbxw5
	Svs3b	Gar1		Fbxw7
	Svs2	Pla2g12a		Fdft1
	Wfdc5	Ostc		Fdps
	Wfdc15b	Rpl34		Fdx1
	Wfdc12	Aimp1		Fdx1l
	Matn4	Ints12		Fdxr
	Svs6	Gstcd		Fech
	Svs3a	Bdh2		Fen1
	Svs5	Cenpe		Fgfr1
	Slpi	Nhedc1		Fgfr1op
	Wfdc9	Ube2d3		Fh1
	Wfdc8	Manba		Fhl3
	Spinlw1	Lamtor3		Fig4
	Spint3	H2afz		Fignl1
	Wfdc6a	Adh5		Fiz1
	Wfdc16	Eif4e		Fkbp1a
	Wfdc6b	Gtf2b		Fkbp4
	Wfdc3	Ccbl2		Fkbp8
	Spint4	2021-09-15		Fkbpl
	Wfdc13	Sh3glb1		Flcn
	Spata25	Znhit6		Flii
	Neurl2	Bcl10		Flt3
	Ocstamp	Gng5		Fn1
	Zfp663	Rpf1		Fnbp4
	Slc2a10	Fubp1		Fnta
	Fam65c	Fam73a		Foxc1
	Kcng1	Zzz3		Foxd3
	Cyp24a1	Acadm		Foxi2
	Cbln4	Rabggtb		Foxk1
	Mc3r	Zranb2		Foxk2
	1700029J11Rik	Cth		Foxl1
	Gcnt7	Ankrd13c		Foxm1
	Spo11	Lrrc40		Foxn2
	Pck1	Depdc1a		Foxo1
	Ankrd60	Eps15		Foxred1
	1700021F07Rik	Fsbp		Frg1
	1700010B08Rik	Rars2		Frrs1l
	Tubb1	Bag1		Frs3
	Zfp831	Erp44		Fsd2
	Gm14431	Clta		Ftl1
	Gm14306	Slc44a1		Fto
	Gm14308	Sh3gl2		Ftsj2
	100043387	Pgm2		Ftsjd1
	Ppp1r3d	Zcchc17		Ftsjd2
	Cdh26	Zdhhc18		Fus
	BC066135	Gm13139		Fut2
	Ntsr1	Mtor		Fzd5
	Srms	Ccnl2		G2e3
	Ptk6	Tgs1		G3bp2
	BC051628	Impad1		G6pdx
	4930526D03Rik	Rab2a		Gaa
	Gm14496	Ints8		Gabarapl2
	Vtcn1	Tmem55a		Gabpa
	Zfhx4	Tmem64		Gabpb1
	LOC100038947	Usp45		Gabpb2
	Ralyl	Mms22l		Gadd45a
	Egfem1	Mdn1		Gadd45gip1
	Nlgn1	Aco1		Gak
	Fat4	B4galt1		Galk2
	Kcnab1	Nudt2		Galnt6
	Fga	Ubap2		Galntl5
	Hsd3b3	Rnf38		Gapdh
	Nr1h5	Tmeff1		Gar1
	Slc22a15	Tmem38b		Gars
	Dpyd	Zfp462		Gart
	Enpep	AI314180		Gatad2a
	Col25a1	Ptgr1		Gatad2b
	Wdr63	Rod1		Gatb
	Ptger3	Wdr31		Gatc
	Negr1	Cdk5rap2		Gbf1
	Hnf4g	Kdm4c		Gbp6
	Gm5150	Ttc39b		Gbx2
	Bhlhe22	Haus6		Gcgr
	Spata16	BC057079		Gcn1l1
	Tmem212	Elavl2		Gcsh
	Mecom	Plaa		Gemin4
	Kcnmb3	Hook1		Gemin5
	Kcnmb2	Tm2d1		Gemin8
	Pex5l	Dnajc6		Get4
	Trpc3	Jak1		Gfap
	Ccdc144b	Dab1		Gfer
	Gm5148	Ssbp3		Gfm2
	Pcdh10	Usp24		Ggnbp2
	Slc7a11	Tmem48		Ggps1
	Maml3	Scp2		Gigyf2
	Trpc4	Zyg11a		Gins1
	Gpr149	Txndc12		Gins2
	Vmn2r6	Osbpl9		Gins4
	Gm1647	Zcchc11		Gipr
	Sis	Orc1		Gja1
	Fstl5	Faf1		Gjd4
	Gm17359	Gpbp1l1		Gkn3
	Lrat	Atpaf1		Glce
	Gucy1a3	Eri3		Gle1
	Cd5l	Rnf220		Gli2
	Fcrl5	Kdm4a		Glmn
	Kcnn3	Foxj3		Glo1
	Sprr2d	Nfyc		Glrx3
	Selenbp2	Rlf		Gltp
	Hsd3b5	Cap1		Gltscr2
	Hsd3b4	Macf1		Gm10024
	Tbx15	Rragc		Gm10094
	Spag17	Ppie		Gm10104
	Syt6	Zmym4		Gm10147
	Kcnd3	S100pbp		Gm10220
	Fndc7	Ptp4a2		Gm10228
	5330417C22Rik	Pum1		Gm10229
	Ntng1	Nkain1		Gm10324
	Olfm3	Eya3		Gm10354
	Palmd	Lin28a		Gm10406
	D3Bwg0562e	Fam54b		Gm10408
	4833424O15Rik	Ccdc21		Gm10413
	Prss12	Arid1a		Gm10471
	Ndst3	Rps6ka1		Gm10662
	1700006A11Rik	D4Wsu53e		Gm10696
	Ndst4	Luzp1		Gm10697
	Arsj	Hspg2		Gm10767
	Alpk1	Ece1		Gm10922
	Ccdc109b	Capzb		Gm11237
	Lrit3	Aldh4a1		Gm11487
	Bank1	Minos1		Gm11559
	B930007M17Rik	Kazn		Gm11711
	Unc5c	Pdpn		Gm11758
	Col24a1	Prdm2		Gm12789
	Dnase2b	Agtrap		Gm129
	Eltd1	Zfp534		Gm13139
	Ak5	Gm13154		Gm13157
	St6galnac5	Apitd1		Gm13212
	Slc44a5	Kif1b		Gm13242
	Tnni3k	Ube4b		Gm13251
	Lrrc7	Gnb1		Gm13275
	1700008P02Rik	Ube2j2		Gm13276
	Fabp4	Rps20		Gm13288
	Fabp9	Chchd7		Gm13290
	Pmp2	Sdcbp		Gm13306
	Fabp12	2610301B20Rik		Gm13871
	Slc10a5	Plekhf2		Gm14151
	Slc7a12	2310030N02Rik		Gm14295
	Gm9733	Trp53inp1		Gm14305
	Sirpb1a	1110037F02Rik		Gm14308
	Sirpb1b	Fam92a		Gm14322
	Crh	Otud6b		Gm14325
	Trim55	Cpne3		Gm14345
	Cp	Wwp1		Gm14346
	Cpb1	Ggh		Gm14347
	Cpa3	2610029I01Rik		Gm14391
	Agtr1b	Ccnc		Gm14393
	Tnfsf10	Sfrs18		Gm14434
	Ghsr	Ndufaf4		Gm14440
	Slc2a2	1810074P20Rik		Gm14496
	Arpm1	Map3k7		Gm14501
	Samd7	Casp8ap2		Gm14632
	Cldn11	Pnrc1		Gm15097
	Qrfpr	Orc3		Gm15114
	Il2	Akirin2		Gm15127
	Il21	Slc35a1		Gm15284
	Pcdh18	Zfp292		Gm15292
	Mgst2	3110043O21Rik		Gm15299
	Stoml3	Topors		Gm15319
	Postn	Ndufb6		Gm1604b
	A730037C10Rik	Smu1		Gm16367
	Mab21l1	Dnaja1		Gm16381
	Tm4sf1	Chmp5		Gm16513
	Tm4sf4	Nfx1		Gm17019
	Gm410	Ube2r2		Gm1979
	Fam194a	Nol6		Gm1993
	Clrn1	Dcaf12		Gm20747
	Gpr171	Ubap1		Gm20767
	P2ry14	Dctn3		Gm20809
	P2ry13	2810432D09Rik		Gm20815
	P2ry12	Sigmar1		Gm20816
	Gpr87	Vcp		Gm20831
	Gm5538	Stoml2		Gm20852
	Gm8298	Ccdc107		Gm20865
	C130079G13Rik	Tln1		Gm21119
	Aadacl2	Hint2		Gm21319
	Aadac	Glipr2		Gm21498
	Sucnr1	Melk		Gm21637
	Vmn2r2	Grhpr		Gm21943
	Vmn2r3	Polr1e		Gm21951
	Vmn2r4	Tomm5		Gm2696
	Vmn2r5	Rg9mtd3		Gm2863
	Vmn2r7	Exosc3		Gm2897
	Ptx3	Ncbp1		Gm2927
	Shox2	Nans		Gm2933
	Rarres1	Anp32b		Gm2a
	Il12a	Sec61b		Gm3238
	Arl14	Tex10		Gm3383
	1110032A04Rik	5730528L13Rik		Gm3415
	Otol1	Mrpl50		Gm3488
	Slitrk3	Rnf20		Gm3500
	Serpini2	Smc2		Gm3558
	Rxfp1	Nipsnap3b		Gm3604
	Gria2	Rad23b		Gm3701
	Tdo2	Klf4		Gm3706
	Ctso	Ikbkap		Gm4214
	Gucy1b3	Ctnnal1		Gm4301
	Accn5	Txn1		Gm4305
	Npy2r	Gng10		Gm4559
	Fgb	Ugcg		Gm4567
	Tigd4	1110054O05Rik		Gm4745
	Dear1	Slc31a1		Gm4763
	Glt28d2	Cdc26		Gm4836
	Mab21l2	Prpf4		Gm4871
	Fcrls	Alad		Gm4951
	Fcrl1	Pole3		Gm5148
	4933430H15Rik	Atp6v1g1		Gm5458
	Insrr	3110001D03Rik		Gm5591
	Sh2d2a	Snapc3		Gm561
	Ttc24	Psip1		Gm5622
	Hapln2	Rraga		Gm5640
	Bglap	Plin2		Gm5662
	Bglap2	Rps6		Gm572
	Rxfp4	Mtap		Gm5795
	Rab25	5830433M19Rik		Gm5796
	Dcst1	Ift74		Gm5797
	S100a5	L1td1		Gm5891
	S100a3	Usp1		Gm5935
	S100a8	Ak4		Gm6034
	Pglyrp4	Leprot		Gm6408
	S100a9	Gm12794		Gm6460
	S100a7a	Mier1		Gm6531
	Pglyrp3	Dhcr24		Gm6537
	Prr9	Ttc4		Gm6710
	Lor	Mrpl37		Gm6902
	Lelp1	Tmem59		Gm7120
	Sprr2a1	Hspb11		Gm7361
	Sprr2b	Lrrc42		Gm8300
	Sprr2i	Cpt2		Gm8693
	Sprr2f	0610037L13Rik		Gm8898
	Sprr2h	Magoh		Gm8994
	Sprr3	Echdc2		Gm906
	Sprr2k	Gpx7		Gm9125
	Sprr1b	Prpf38a		Gm9268
	Sprr4	Cc2d1b		Gm9376
	Smcp	Btf3l4		Gm9758
	Sprr1a	Kti12		Gm9897
	Ivl	Nrd1		Gmcl1l
	Lce1d	Rnf11		Gmeb2
	Lce1a2	Cmpk1		Gml
	Lce1e	4732418C07Rik		Gmnn
	Lce1f	Mknk1		Gmppb
	Lce1c	Lrrc41		Gmps
	Lce6a	Pomgnt1		Gna11
	Lce1a1	Uqcrh		Gnai2
	Lce1b	Rad54l		Gnb1
	Lce1h	Tmem69		Gnb2l1
	Lce1i	Ccdc163		Gng5
	Kprp	Mmachc		Gnl1
	Lce1g	Akr1a1		Gnl3
	Lce1k	Nasp		Gnl3l
	Lce1l	Prdx1		Gnpat
	2310050C09Rik	Toe1		Golga7
	Lce3c	Mutyh		Golph3l
	Lce3b	Urod		Golt1b
	Lce3a	Eif2b3		Gon4l
	Lce3f	Rps8		Gosr1
	2310001H18Rik	Kif2c		Gosr2
	Crct1	Dmap1		Got2
	Lce1m	Atp6v0b		Gpaa1
	Crnn	Ptprf		Gpatch1
	Flg2	Med8		Gpatch4
	Hrnr	Cdc20		Gpatch8
	Tchhl1	Ebna1bp2		Gpbp1
	Rptn	Ccdc23		Gpbp1l1
	Tdpoz1	Slc2a1		Gpi1
	Gm10697	Ppih		Gpkow
	Gm9125	Ybx1		Gpn1
	C2cd4d	Lepre1		Gpn3
	Lingo4	Ppcs		Gpr107
	Celf3	Ctps		Gpr135
	Ctss	Ppt1		Gpr31b
	Hist2h4	Trit1		Gpr89
	Hist2h2aa1	Pabpc4		Gprin2
	Hist2h2ac	Akirin1		Gps1
	Hist2h3b	Ndufs5		Gps2
	Hist2h2ab	Mycbp		Gpx4
	Fcgr1	Utp11l		Grb2
	Gja8	Inpp5b		Grn
	Cd160	Sf3a3		Grpel1
	Gja5	Cdca8		Grpel2
	Olfr1402	Yrdc		Gsdmc
	Gm5544	Snip1		Gspt1
	Adam30	Gnl2		Gsta2
	Reg4	Mrps15		Gtf2a1
	Hsd3b2	Stk40		Gtf2e1
	Hsd3b6	Lsm10		Gtf2e2
	Hao2	Trappc3		Gtf2f1
	Hsd3b1	Thrap3		Gtf2f2
	Cd101	Adprhl2		Gtf2h1
	Nhlh2	Eif2c1		Gtf2h2
	Tshb	Clspn		Gtf2h3
	Olfml3	Psmb2		Gtf2h4
	Fam19a3	Zmym1		Gtf2h5
	Wnt2b	Sfpq		Gtf2i
	4930564D02Rik	Zmym6		Gtf3a
	Adora3	Gjb3		Gtf3c1
	Chi3l4	BC003266		Gtf3c2
	Chia	Gjb5		Gtf3c5
	BC051070	Ak2		Gtf3c6
	Olfr266	Rnf19b		Gtl3
	Cd53	Yars		Gtpbp3
	Kcna3	Zbtb8os		Gtpbp6
	Kcna2	Rbbp4		Gtpbp8
	Cym	Bsdc1		H2afj
	A630076J17Rik	Hdac1		H2afx
	Prok1	Marcksl1		H2-D1
	Kcna10	Tmem234		H2-Ke2
	Slc16a4	Kpna6		H2-Q1
	Slc6a17	Txlna		H2-Q6
	Ubl4b	Eif3i		H2-Q7
	Alx3	Khdrbs1		H2-T22
	Eps8l3	Pef1		H2-T23
	Gpr61	Fabp3		H3f3a
	Sypl2	Snrnp40		Hacd2
	Mybphl	Laptm5		Hadha
	1700013F07Rik	Srsf4		Hadhb
	Aknad1	Mecr		Harbi1
	4930443G12Rik	Ythdf2		Hars2
	Amy2b	Taf12		Hat1
	Amy2a2	Rcc1		Haus1
	Amy2a5	Trnau1ap		Haus2
	Vcam1	Atpif1		Haus4
	Gpr88	Sesn2		Haus5
	Lrrc39	Dnajc8		Haus6
	4930432M17Rik	Smpdl3b		Haus7
	Fabp2	Rpa2		Haus8
	Myoz2	Stx12		Hax1
	Neurog2	Fam76a		Hbs1l
	Tifa	Ppp1r8		Hccs
	Cfi	Wasf2		Hcfc1r1
	Rrh	Tmem222		Hdac1
	Agxt2l1	Wdtc1		Hdac3
	Dkk2	Nudc		Heatr2
	Cxxc4	Hmgn2		Heatr3
	Tacr3	Sh3bgrl3		Heatr5b
	Emcn	Stmn1		Hells
	Gm4861	2610002D18Rik		Helq
	4930579F01Rik	Tmem57		Helz
	Adh1	Tmem50a		Hemt1
	Adh6a	Syf2		Herpud1
	Gbp7	Clic4		Hes1
	Gbp5	Srrm1		Hexim1
	Gbp3	Fuca1		Hexim2
	Gbp1	Pnrc2		Hgs
	Clca1	Srsf10		Hif1an
	Gm6289	Hmgcl		Higd2a
	Clca6	Rpl11		Hinfp
	Clca5	1110049F12Rik		Hipk2
	Mcoln2	Tceb3		Hira
	Lpar3	Tcea3		Hist1h2aa
	4930503B20Rik	Hnrnpr		Hist1h2ab
	H28	Kdm1a		Hist1h2ac
	Ptgfr	Cdc42		Hist1h2ad
	Ifi44	Usp48		Hist1h2ae
	Asb17	Alpl		Hist1h2ag
	Lhx8	Ddost		Hist1h2ah
	Rpe65	Hp1bp3		Hist1h2ai
	Fhl5	Mrto4		Hist1h2ak
	Lrrc69	Ubr4		Hist1h2an
	Mmp16	Rcc2		Hist1h2ao
	Lingo2	Sdhb		Hist1h2ap
	E130309F12Rik	Necap2		Hist1h2ba
	Pappa	D4Ertd22e		Hist1h2bb
	Astn2	Fbxo42		Hist1h2bf
	Rasef	Epha2		Hist1h2bh
	Nfia	Fblim1		Hist1h2bj
	Skint5	Ddi2		Hist1h2bk
	Agbl4	Pramef12		Hist1h2bl
	Hivep3	Gm13242		Hist1h2bm
	Pramel4	Gm13251		Hist1h2bn
	Sdr16c5	Gm13247		Hist1h2bp
	Tox	Gm13051		Hist1h3a
	Clvs1	2610305D13Rik		Hist1h3b
	Cngb3	Gm13157		Hist1h3c
	Nkain3	Plod1		Hist1h3d
	Pou3f2	Clcn6		Hist1h3e
	Klhl32	Fbxo6		Hist1h3g
	Gabrr2	Mad2l2		Hist1h3h
	Pax5	Srm		Hist1h3i
	Gabbr2	Exosc10		Hist1h4a
	Col15a1	Tardbp		Hist1h4b
	Acnat2	Pgd		Hist1h4c
	Grin3a	Lzic		Hist1h4d
	Actl7b	Nmnat1		Hist1h4f
	Musk	Clstn1		Hist1h4h
	Svep1	Slc25a33		Hist1h4i
	Mup14	Eno1		Hist1h4j
	Tnc	Park7		Hist1h4k
	Frmd3	Vamp3		Hist1h4m
	Frem1	Dnajc11		Hist1h4n
	Slc24a2	Nol9		Hist2h2aa1
	Ifna6	Acot7		Hist2h2aa2
	Ror1	Rpl22		Hist2h2ab
	Sgip1	Icmt		Hist2h2ac
	Pde4b	A430005L14Rik		Hist2h2bb
	1700024P16Rik	Tprgl		Hist2h2be
	Ttc22	Wdr8		Hist2h3b
	Glis1	Pank4		Hist2h3c1
	3110021N24Rik	Rer1		Hist2h3c2
	4930522H14Rik	Nadk		Hist2h4
	Skint3	Cdk11b		Hist3h2ba
	Skint9	Ssu72		Hist3h2bb-ps
	Skint4	Mrpl20		Hist4h4
	Skint6	Atad3a		Hjurp
	Skint11	Aurkaip1		Hk2
	Gm12824	Cpsf3l		Hltf
	Gm1661	Sdf4		Hmbs
	Col16a1	Agrn		Hmg20a
	Gm853	9430015G10Rik		Hmgb2
	Lactbl1	Gak		Hmgcr
	C1qc	Orc5		Hmgcs1
	Vwa5b1	Srpk2		Hmgn1
	Pax7	Pds5a		Hmgn2
	Padi1	Ep400		Hmgxb3
	Gm13040	Coro1c		Hmox1
	Oog2	Ptpn11		Hnrnpa1
	Gm13178	Rbm19		Hnrnpa3
	Aadacl3	Sfswap		Hnrnpc
	Rex2	Mad1l1		Hnrnpf
	Ajap1	Cldn12		Hnrnpk
	Vmn1r3	Phtf2		Hnrnpu
	Vmn1r2	Agap3		Hnrnpul2
	Sdr16c6	Rbm33		Hoxa4
	Cyp7a1	Slc4a1ap		Hoxd10
	Gdf6	Bre		Hpcal1
	Cdh17	C330019G07Rik		Hras
	Slc26a7	Ppp1cb		Hsd17b12
	Calb1	Maea		Hsf2
	Slc7a13	Haus3		Hsp90ab1
	Atp6v0d2	Whsc1		Hsp90b1
	Prdm13	Htt		Hspa14
	Gja10	Nop14		Hspa4
	Spaca1	D5Ertd579e		Hspa4l
	Gm136	Wdr1		Hspa5
	Cga	Bod1l		Hspa8
	Ifnk	Fbxl5		Hspa9
	1700009N14Rik	Dhx15		Hspd1
	Tmem215	Rbpj		Hspe1
	Aqp7	Rell1		Htatip2
	1110017D15Rik	Pgm1		Htatsf1
	Ccl21b	Tbc1d1		Hus1
	Gm13308	Rfc1		Huwe1
	Gm13298	Lias		Hyls1
	Ccl27b	Ube2k		Hyou1
	Gm13305	N4bp2		Hypk
	Ccl19	Atp10d		Iars2
	Ccl21a	Dcun1d4		Iba57
	N28178	Fip1l1		Ice1
	1700022I11Rik	Kit		Ice2
	Cd72	Noa1		Icmt
	Fam166b	Ankrd17		Ict1
	Msmp	Scarb2		Id1
	Hrct1	2021-09-11		Idh3a
	4930412F15Rik	Hnrnpd		Idh3b
	Olfr71	Sec31a		Idi1
	Olfr70	Aff1		Idi2
	Olfr156	Klhl8		Ier2
	Olfr157	Lrrc8d		Ier3ip1
	Olfr159	Zfp644		Ifna2
	Olfr155	Pcgf3		Ifna6
	Ccin	Mtf2		Ifnab
	Gm829	Evi5		Ifnz
	E230008N13Rik	Golga3		Ift74
	Foxe1	Pole		Ift80
	Hemgn	Chek2		Igbp1
	Nr4a3	Pitpnb		Igf2bp1
	Acnat1	Kctd10		Igsf21
	Aldob	Git2		Ik
	Ppp3r2	Sppl3		Ikbkap
	Cylc2	Mlec		Il12rb1
	4930547C10Rik	Coq5		Il23r
	Olfr273	Rfc5		Il6st
	Olfr272	Med13l		Ilf2
	Olfr275	Erp29		Ilf3
	Olfr270	Aldh2		Immt
	Nipsnap3a	Atp2a2		Imp3
	Tal2	Kdm2b		Impa1
	Actl7a	Vps33a		Impdh2
	Txndc8	Kntc1		Inadl
	Olfr267	Gtf2h3		Incenp
	Slc46a2	Setd8		Ing1
	Mup15	Rabgef1		Ing2
	Mup8	Psph		Ing3
	Mup9	Tyw1		Ing4
	Mup1	Gtf2ird1		Ing5
	Gm2083	Gtf2i		Ino80
	Mup12	Por		Ino80b
	Mup13	Fkbp6		Ino80d
	Mup16	Sun1		Inpp1
	LOC100048884	Eif3b		Ints1
	Mup17	Wipi2		Ints10
	Mup19	Rnf216		Ints12
	Mup5	Kdelr2		Ints2
	Mup20	Arpc1b		Ints3
	Mup21	Usp12		Ints4
	Kif12	Cdk8		Ints5
	Ambp	Pan3		Ints6
	Orm3	Slc7a1		Ints7
	Orm2	Pds5b		Ints8
	Orm1	Gatad1		Ints9
	1700018C11Rik	Fam133b		Ip6k1
	Tnfsf15	Krit1		Ipmk
	Tnfsf8	Cyp51		Ipo11
	Tlr4	Gtpbp10		Ipo13
	LOC100502924	Steap1		Ipo4
	Gm11757	Sri		Ipo5
	Gm11756	Dbf4		Ipo7
	2310002L09Rik	Slc25a40		Ipo9
	Tyrp1	Crot		Iqgap1
	Cer1	Dmtf1		Isca1
	Gm12597	Tmem60		Isca2
	Ifnb1	Ptpn12		Isg20l2
	Ifna9	Armc10		Isy1
	Ifnab	Psmc2		Itga3
	Ifna13	Pmpcb		Itgb1
	Ifna12	Dnajc2		Itln1
	Ifna2	Pus7		Itpa
	Gm13280	Tomm7		Iws1
	Ifna14	Klhl7		Jak1
	C87499	Fastk		Jarid2
	Gm13272	Abcf2		Jmjd1c
	Gm13277	Nub1		Jmjd6
	Gm13278	Rheb		Jmjd8
	Gm13285	Galnt11		Jtb
	Gm13275	Paxip1		Kansl1
	Ifnz	Insig1		Kansl2
	Gm13276	Cnpy1		Kansl3
	Ifna7	Nom1		Kat5
	Ifna11	Ube3c		Kat6a
	Gm13271	Dnajb6		Kat6b
	Gm13286	Tyms		Kat7
	Gm13283	Hadha		Kat8
	Ifne	Hadhb		Katna1
	Ifna5	Cenpa		Katnb1
	Ifna1	Tmem214		Kcnab3
	Ifna4	Ost4		Kcnc3
	Dmrta1	0610007C21Rik		Kcnk5
	Izumo3	Mpv17		Kctd10
	Lrrc19	Cad		Kctd13
	4930579C15Rik	Snx17		Kctd18
	Cyp2j12	Nrbp1		Kctd7
	Cyp2j11	Eif2b4		Kdm1a
	Cyp2j8	Gtf3c2		Kdm2a
	Cyp2j5	Ppm1g		Kdm4a
	Gm12695	Zfp512		Kdm4c
	Angptl3	Gpn1		Kdm5b
	Ube2u	Mrpl33		Kdm5c
	Gm12789	Yes1		Kdm8
	Tctex1d1	Pisd		Kdsr
	4921539E11Rik	Ywhah		Keap1
	C8a	Ctbp1		Khdrbs1
	Bsnd	Slbp		Khsrp
	Fam151a	Tacc3		Kidins220
	Cdcp2	Whsc2		Kif11
	Ldlrad1	Rnf4		Kif14
	Dio1	Add1		Kif15
	Podn	Mfsd10		Kif18a
	Cdkn2c	Lrpap1		Kif18b
	Dmrta2	Grpel1		Kif20a
	Skint7	Tbc1d14		Kif20b
	Slc5a9	Mrfap1		Kif22
	Skint8	Crmp1		Kif2c
	Skint1	Tmem128		Kif4
	Skint10	Lyar		Kifc1
	Foxd2	Zfp518b		Kifc5b
	Foxe3	Tapt1		Kin
	Cyp4x1	Qdpr		Kiss1r
	Cyp4a29-ps	Lap3		Klb
	Cyp4a12a	Ncapg		Klf2
	Cyp4a10	Gpr125		Klf4
	Cyp4a30b-ps	Pi4k2b		Klf5
	Cyp4a12b	Zcchc4		Klhdc10
	Cyp4a14	Anapc4		Klk1
	Cyp4a31	Klf3		Klk1b27
	Cyp4a32	Rpl9		Klrb1a
	Cyp4b1	Ugdh		Kmt2a
	4930544O15Rik	Uchl1		Kmt2b
	Kncn	Slc30a9		Kmt2d
	1700042G07Rik	Bend4		Knstrn
	Ccdc17	Gnpda2		Kntc1
	Tctex1d4	Guf1		Kpna1
	Mpl	Commd8		Kpna2
	Olfr62	Nfxl1		Kpna6
	Wdr65	Ociad1		Kras
	Olfr1337	Chic2		Kri1
	Olfr1341	Tmem165		Krt39
	Olfr1338	Exoc1		Krt79
	Olfr1342	Srp72		Krtap19-5
	Olfr1340	Paics		Krtap20-2
	Olfr1339	Ppat		Krtap22-2
	Olfr1335	Rest		Krtap4-1
	Olfr1330	Polr2b		Krtap4-13
	Olfr1328	Cenpc1		Krtap4-2
	Olfr1331	Uba6		Krtap4-8
	Olfr1329	Ythdc1		Krtap4-9
	Olfr1333	Utp3		Krtap5-2
	Lao1	Grsf1		Krtap5-3
	Ermap	Dck		Krtap5-4
	Guca2b	Cox18		Krtap6-1
	Guca2a	Rchy1		Krtap6-5
	Edn2	G3bp2		Kti12
	Gm8439	Uso1		Kxd1
	Slfnl1	Sdad1		L1td1
	Cited4	Nup54		L3hypdh
	Tmco2	Ccni		L3mbtl2
	Gm12886	Ccng2		L3mbtl3
	Gm12888	Mrpl1		l7Rn6
	Gm12887	Enoph1		Lage3
	9530002B09Rik	Hnrpdl		Lama1
	Oxct2b	Cops4		Lamtor2
	Heyl	Coq2		Lamtor3
	Nt5c1a	Mrps18c		Lamtor4
	Oxct2a	Hsd17b11		Lamtor5
	Dnali1	Nudt9		Larp1
	Tfap2e	Spp1		Larp4
	CK137956	Cdc7		Lars2
	4930465A12Rik	Rpap2		Las1l
	Hmgb4	Rpl5		Lats1
	Tlr12	Dr1		Lcat
	A3galt2	Atp5k		Lce1a1
	Tssk3	Zfp932		Lce1a2
	1700125D06Rik	Chfr		Lce1c
	Fam167b	Pgam5		Lce1d
	Tmem200b	Ankle2		Lce1e
	Oprd1	Noc4l		Lce1g
	Nr0b2	Pus1		Lce1j
	Catsper4	Hscb		Lce1k
	Gm7534	Ulk1		Lce1l
	Htr1d	Sart3		Lce3c
	4930549C01Rik	Iscu		Lcmt1
	C1qb	Ung		Ldb1
	C1qa	Ube3b		Ldha
	Gm13011	Gltp		Lemd2
	1700013G24Rik	Ankrd13a		Leng1
	Cela3b	2610524H06Rik		Leng8
	Ldlrad2	Acads		Leo1
	Pla2g2d	Unc119b		Lgals12
	Pla2g2a	Rnf10		Lhx4
	Pla2g2f	Pop5		Lias
	Rnf186	Cox6a1		Lifr
	Htr6	Srsf9		Lig1
	Hspb7	Triap1		Lig4
	Gm694	Dynll1		Lima1
	Slc25a34	Pla2g1b		Lims1
	Agmat	Rab35		Lin37
	Ctrc	Gcn1l1		Lin52
	Lrrc38	Rplp0		Lin54
	Oog4	Prkab1		Lin9
	Gm13088	Hspb8		Lins
	Gm13023	Suds3		Liph
	Gm13103	Pebp1		Lipt1
	Gm13084	Wsb2		Lipt2
	Pramef17	Fbxw8		Llph
	Gm13102	Tbx3		Lmf1
	Oog3	Plbd2		LOC100048884
	C87977	Ddx54		LOC100861615
	Pramel5	Rpl6		Lpcat3
	1700012P22Rik	Naa25		Lrch4
	Gm13125	Mapkapk5		Lrp5
	9430007A20Rik	Atxn2		Lrp6
	Gm13124	Ppp1cc		Lrpprc
	Gm13177	Vps29		Lrrc36
	Gm436	1500011H22Rik		Lrrc57
	Gm438	Gpn3		Lrrc69
	Nppa	Anapc7		Lrsam1
	Nppb	Arpc3		Lsm1
	Ptchd2	Rnf34		Lsm10
	Angptl7	Anapc5		Lsm11
	Gpr157	Diablo		Lsm12
	Slc2a7	Zcchc8		Lsm14a
	Uts2	Rsrc2		Lsm2
	Hes2	Denr		Lsm3
	Hes3	Arl6ip4		Lsm4
	Ccdc27	Cdk2ap1		Lsm5
	Actrt2	Sbno1		Lsm6
	Ttc34	Eif2b1		Lsm8
	Hes5	Tmed2		Lsmd1
	Gabrd	Zfp664		Lta4h
	Tmem240	Scarb1		Ltb4r2
	Tmem88b	Ubc		Luc7l3
	Tas1r3	Glt1d1		Ly6c2
	Tnfrsf18	Ran		Lyar
	Ttll10	Gbas		Lyn
	Isg15	Mrps17		Lypd6b
	2310042D19Rik	Cct6a		Lyrm2
	Sdk1	Chchd2		Lyrm4
	Zfp804b	Sumf2		Lztfl1
	Sema3d	Vkorc1l1		Lztr1
	Slc2a9	Asl		Lzts3
	Kcnip4	Crcp		Mad1l1
	Ldb2	Gusb		Mad2l1
	Slc10a4	Tpst1		Mad2l1bp
	Gabrb1	Sbds		Mad2l2
	Cxcl15	0610007L01Rik		Mafg
	Tmprss11f	Eif4h		Magea1
	Tmem132c	Rfc2		Magea2
	Caln1	Cldn4		Mak16
	Srrm3	Abhd11		Malsu1
	Cyp3a25	Tbl2		Map1s
	Kpna7	Wbscr22		Mapk1
	4930511M11Rik	Baz1b		Mapk14
	Grm3	Pom121		Mapk1ip1l
	Sema3a	Mdh2		Mapkap1
	Hgf	Tmem120a		Mapre1
	Cd36	Hspb1		2021-03-05
	Ccdc146	Ywhag		2021-03-09
	Fbxl13	Polr2j		Mark2
	Slc26a5	Lrwd1		Mars
	Lhfpl3	Plod3		Mars2
	Htr5a	Fis1		Mastl
	Otof	Ap1s1		Mat2a
	Cib4	Srrt		Matr3
	Hgfac	Gnb2		Mau2
	Stk32b	Pop7		Max
	Nsg1	Lrch4		Maz
	C1qtnf7	Pcolce		Mbd3
	Ppargc1a	Zcwpw1		Mbip
	Ccdc149	Taf6		Mbtd1
	Pcdh7	Cops6		Mbtps1
	3110047P20Rik	Ap4m1		Mbtps2
	Grxcr1	Mcm7		Mcl1
	Gabrg1	Zscan21		Mcm10
	Gabra2	Stag3		Mcm2
	Cnga1	0910001L09Rik		Mcm3
	Txk	Heatr2		Mcm3ap
	Corin	Adap1		Mcm5
	Spata18	Get4		Mcm7
	1700023E05Rik	Cox19		Mcm8
	Tecrl	Actb		Mcm9
	Epha5	Fscn1		Mcmbp
	Stap1	Rac1		Mcph1
	Ugt2b5	Aimp2		Mcrs1
	Tmprss11e	Pms2		Mcu
	Sult1b1	Eif2ak1		Mcur1
	Csn1s2a	Ccz1		Mdc1
	Afm	Bri3		Mdh2
	Gm3286	Trrap		Mdm2
	E330014E10Rik	Arpc1a		Mdn1
	Fras1	Zkscan5		Meaf6
	Antxr2	Zfp655		Med10
	Fgf5	Atp5j2		Med11
	1700007G11Rik	Pdap1		Med12
	Tmem150c	Cpsf4		Med13l
	Agpat9	Bud31		Med14
	Arhgap24	Rnf6		Med15
	Mapk10	Wasf3		Med16
	Gbp11	Rpl21		Med17
	Srrm4	Gtf3a		Med18
	Tmem233	Polr1d		Med19
	Tbx5	Pomp		Med20
	Oas1e	Ubl3		Med22
	Myl2	Hmgb1		Med23
	Abcb9	Uspl1		Med24
	Tmem132b	Hsph1		Med25
	BC055004	Brca2		Med26
	Card11	Rfc3		Med27
	Cyp3a11	Exoc4		Med28
	Cyp3a57	Zfml		Med29
	4930449I24Rik	Mkln1		Med30
	Flt1	Smarcad1		Med31
	Rxfp2	Gfpt1		Med4
	Wdr95	Exoc6b		Med6
	Kl	Slc2a3		Med7
	4932412H11Rik	Cdca3		Med8
	1700015F17Rik	Rad51ap1		Med9
	4921511H03Rik	Ccdc132		Mepce
	Steap4	Slc25a13		Metap1
	Gm6460	Acn9		Metap2
	4933402N22Rik	Fam3c		Mettl1
	Speer3	Rbm28		Mettl14
	Speer4e	Snd1		Mettl15
	Gm9758	Nrf1		Mettl17
	Gm17019	Tnpo3		Mettl21a
	Speer4d	Copg2		Mettl3
	Speer4f	Chchd3		Mfap1a
	Gnat3	Cnot4		Mfap1b
	Asb10	Luc7l2		Mfap5
	Galntl5	Trim24		Mff
	Cct8l1	Cul1		Mfn1
	5031410I06Rik	Igf2bp3		Mfn2
	Gm10220	Mpp6		Mga
	Speer4a	Snx10		Mgat1
	Gm10471	Skap2		Mgea5
	Speer4b	Hibadh		Mif
	Shh	Tax1bp1		Mina
	Mnx1	Abcg2		Minos1
	Il6	Prdm5		Mios
	3110082J24Rik	Kdm3a		Mipep
	Kcnk3	Hk2		Mis12
	Tcf23	Alms1		Mis18a
	Ucn	Tia1		Mis18bp1
	Gckr	Eefsec		Mitd1
	4930548H24Rik	Chchd6		Mki67
	Gm1673	Nup210		Mki67ip
	Dok7	Suclg2		Mlf1ip
	Adra2c	Shq1		Mlh1
	Hmx1	Ppp4r2		Mllt1
	Psapl1	Itpr1		Mlst8
	Cytl1	Rad18		Mlx
	Drd5	Fancd2		Mlxip
	Otop1	Raf1		Mmachc
	Nkx3-2	Bms1		Mmadhc
	Clrn2	Wnk1		Mmp15
	Sod3	Kdm5a		Mms22l
	Slc34a2	Cecr2		Mnat1
	Cckar	Bid		Mnf1
	G6pd2	Mical3		Mob4
	Gm17384	Rimklb		Mocs3
	Tlr6	Lpcat3		Mogs
	Tlr1	Cd9		Morc2a
	Rhoh	Cops7a		Morc3
	Nsun7	4933413G19Rik		Morf4l2
	Phox2b	Csda		Mphosph10
	Shisa3	Cdkn1b		Mphosph6
	Gm5108	Lrp6		Mphosph8
	Zar1	Dera		Mprip
	Gm5868	Golt1b		Mpv17l2
	Nipal1	5730419I09Rik		Mre11a
	Lrrc66	Etnk1		Mrgbp
	Nmu	Bcat1		Mrgprd
	Arl9	Fgfr1op2		Mrp63
	Gnrhr	Ppfibp1		Mrpl1
	Tmprss11c	Ipo8		Mrpl10
	Tmprss11a	Peg10		Mrpl13
	Tmprss11g	Shfm1		Mrpl14
	Tmprss11bnl	Asns		Mrpl15
	Ugt2b34	Rpa3		Mrpl16
	Ugt2b1	Ndufa4		Mrpl17
	Ugt2b35	Capza2		Mrpl19
	Ugt2b36	Naa38		Mrpl2
	Ugt2b37	Ndufa5		Mrpl21
	Ugt2a3	Wasl		Mrpl22
	Ugt2a1	Pot1a		Mrpl23
	Ugt2b38	Arf5		Mrpl24
	Sult1d1	Impdh1		Mrpl27
	Sult1e1	Calu		Mrpl28
	Csn2	Atp6v1f		Mrpl3
	Csn1s1	Ube2h		Mrpl30
	4930432K09Rik	Klhdc10		Mrpl33
	Csn1s2b	Zc3hc1		Mrpl34
	Odam	Tmem209		Mrpl36
	4931407G18Rik	Mest		Mrpl37
	Csn3	Akr1b8		Mrpl38
	Smr2	Akr1b3		Mrpl39
	Gm7714	Stra8		Mrpl40
	Prol1	Nup205		Mrpl41
	Amtn	Mtpn		Mrpl42
	Ambn	1110001J03Rik		Mrpl43
	Igj	Mkrn1		Mrpl44
	Enam	Ndufb2		Mrpl45
	Gc	Mrps33		Mrpl47
	Npffr2	Agk		Mrpl48
	Afp	Ssbp1		Mrpl50
	Alb	Ezh2		Mrpl54
	5830473C10Rik	Pdia4		Mrpl57
	Cxcl5	2410003K15Rik		Mrpl9
	Pf4	Tra2a		Mrps10
	Cxcl3	Cycs		Mrps11
	Ppbp	Hnrnpa2b1		Mrps12
	Cxcl1	Cbx3		Mrps14
	Cxcl2	Plekha8		Mrps15
	Epgn	Gars		Mrps16
	Ereg	Lsm5		Mrps17
	Areg	Fkbp9		Mrps18a
	Btc	Nt5c3		Mrps18b
	Cxcl11	Mad2l1		Mrps18c
	Cxcl9	Gadd45a		Mrps2
	Cxcl10	Serbp1		Mrps21
	2010109A12Rik	Eif2ak3		Mrps22
	C87414	Krcc1		Mrps23
	BC061212	Rmnd5a		Mrps24
	A430089I19Rik	Chmp3		Mrps25
	Gm3139	Immt		Mrps26
	AU018829	Mrpl35		Mrps27
	D5Ertd577e	Polr1a		Mrps28
	Cxcl13	Ptcd3		Mrps30
	Gk2	Rnf181		Mrps31
	Prdm8	Usp39		Mrps33
	Bmp3	Mat2a		Mrps35
	Prkg2	Capg		Mrps36
	Nkx6-1	Kcmf1		Mrps5
	Hsd17b13	Tmsb10		Mrps6
	Gm17660	Suclg1		Mrps7
	Sparcl1	Pole4		Mrps9
	Dmp1	Aup1		Mrrf
	Dspp	Mob1a		Msh2
	Mepe	Mthfd2		Msh6
	Ibsp	Bola3		Msl1
	Gbp10	Paip2b		Msmo1
	Gbp6	Spr		Msto1
	Barhl2	Cct7		Mt2
	Lpcat2b	Smyd5		Mta2
	1700028K03Rik	Dusp11		Mtbp
	Gfi1	Tprkb		Mtch2
	Pde6b	Fam136a		Mterf
	Slc26a1	Pcyox1		Mterf3
	Vmn2r9	Snrpg		Mterf4
	Vmn2r8	Pcbp1		Mtf2
	Tmed11	Snrnp27		Mtfmt
	Vmn2r10	Anxa4		Mtfr1
	Vmn2r12	Gmcl1		Mthfd1
	Vmn2r11	Nfu1		Mtif2
	Vmn2r13	Cnbp		Mtif3
	Vmn2r14	Isy1		Mtmr9
	Vmn2r16	8430410A17Rik		Mto1
	Vmn2r15	Copg		Mtor
	Vmn2r17	Rab7		Mtpap
	Crybb1	Rpn1		Mtrf1l
	Gm6583	Sec61a1		Mtrr
	Gm6588	Ruvbl1		Mtx2
	Crybb2	Abtb1		Mul1
	Tmem119	Mcm2		Mup1
	Dao	Plxna1		Mup16
	Oasl2	Klf15		Mup17
	Sds	Tmem43		Mup20
	Lhx5	Lsm3		Mup6
	Ccdc42b	Chchd4		Mup8
	Iqcd	Slc6a6		Mup9
	Oas1f	Trh		Mvd
	Oas1h	Arl6ip5		Mxd3
	Adam1b	Uba3		Mxra8
	Il31	Rybp		Mybbp1a
	Lrrc43	Crbn		Mybl2
	Gpr81	Trnt1		Myc
	Niacr1	Bhlhe40		Mycbp
	Fam101a	Arl8b		Mycn
	2021-09-14	Thumpd3		Myeov2
	A330070K13Rik	Setd5		Myl12a
	Eln	Mtmr14		Myl12b
	Wbscr28	Brpf1		Myo18b
	Cldn13	Arpc4		Myo9b
	Trim50	Tada3		Myocd
	Ccl24	Jagn1		Mzf1
	Ccl26	Tmem111		Mzt1
	2310043J07Rik	Vhl		Mzt2
	Myl10	6720456B07Rik		N4bp1
	Vgf	Sec13		Naa10
	Ache	Tatdn2		Naa15
	Actl6b	1500001M20Rik		Naa30
	Pilra	Tsen2		Naa35
	Pilrb1	Mkrn2		Naa38
	Cyp3a13	Rpl32		Naa40
	Pilrb2	Mbd4		Naa50
	Azgp1	D6Wsu116e		Nacc1
	Smok3a	Hnrnpf		Nadk
	Smok3b	Adipor2		Nadk2
	1700123K08Rik	Ccdc77		Nae1
	Gm5294	Cecr5		Naf1
	Cyp2w1	Bcl2l13		Naif1
	Gpr30	Atp6v1e1		Nampt
	C130050O18Rik	A2m		Napa
	Uncx	Phc1		Narg2
	Elfn1	M6pr		Nars
	Tff1	Gdf3		Nars2
	Cngb1	Nanog		Nat14
	4933411G11Rik	Necap1		Nat9
	Grid2ip	Pex5		Nbn
	Ankrd61	Tpi1		Ncapd2
	Ocm	Phb2		Ncapg
	1700018F24Rik	Grcc10		Ncapg2
	Gm4871	Usp5		Ncaph
	Cyp3a16	Emg1		Ncaph2
	Cyp3a41a	Ptpn6		Ncdn
	Cyp3a44	Mlf2		Ncoa3
	Cyp3a59	Ptms		Ncor1
	1700001J03Rik	Zfp384		Ndc1
	Gm6370	Ing4		Ndc80
	Gm6408	Chd4		Ndor1
	Gm3404	Gapdh		Ndrg3
	Gm3402	Ncapd2		Ndufa10
	Gm3409	Nop2		Ndufa12
	Gsx1	Mrpl51		Ndufa13
	Pdx1	Tuba3a		Ndufa3
	Cdx2	Ndufa9		Ndufa5
	Flt3	D6Wsu163e		Ndufa6
	Prhoxnb	9630033F20Rik		Ndufa7
	6330406I15Rik	Tulp3		Ndufa9
	Zar1l	Fkbp4		Ndufaf1
	Vmn2r18	Gabarapl1		Ndufaf3
	Gxylt2	Magohb		Ndufaf4
	Ano2	Ddx47		Ndufaf5
	Abcc9	Hebp1		Ndufaf6
	Ppp1r3a	Emp1		Ndufaf7
	Thsd7a	Gm8994		Ndufb10
	Slc13a1	Atf7ip		Ndufb11
	Grm8	Wbp11		Ndufb2
	Grid2	Strap		Ndufb3
	Fam190a	Aebp2		Ndufb4
	Ctnna2	Recql		Ndufb5
	Fam19a1	Ldhb		Ndufb6
	Cntn4	Cmas		Ndufb7
	Pparg	Kras		Ndufb8
	Grm7	Lyrm5		Ndufb9
	Vmn2r24	4933424B01Rik		Ndufc1
	Klra1	Med21		Ndufc2
	Gm4736	Tm7sf3		Ndufs1
	Lmo3	Mrps35		Ndufs2
	1700023A16Rik	Ergic2		Ndufs3
	Hepacam2	Caprin2		Ndufs5
	Dlx6	Fam60a		Ndufs7
	Col28a1	2810474O19Rik		Ndufs8
	Nxph1	Pak4		Ndufv1
	Foxp2	C80913		Ndufv2
	Wnt2	Ap3s2		Nedd1
	Cftr	Sec11a		Nek2
	Kcnd2	Clns1a		Nek7
	Cadps2	Lig1		Nek8
	Asb15	Grlf1		Nelfa
	Tmem229a	Pvrl2		Nelfcd
	Cpa4	Arhgef1		Nelfe
	Chrm2	Gmfg		Nf1
	Akr1d1	Zfp568		Nf2
	Tbxas1	Gpi1		Nfatc2ip
	Mgam	Pepd		Nfe2l2
	Gm5567	Ap2a1		Nfkbil1
	Sval2	Hsd17b14		Nfu1
	Nobox	Grwd1		Nfya
	Hoxa7	Herc2		Nfyb
[truncated: 4,718 more rows]
