# Supplementary material for: A multi-omics integrative analysis based on CRISPR screens re-defines the pluripotency regulatory network in ESCs
Source: Research Square preprint supplement (doi:10.21203/rs.3.rs-951395/v1), 2023-03-13
Supplement: Supplementary file 5 [file Supplementary Data6.xlsx]

## Sheet: iSRGS
iSRGS
42434
43895
0610009D07Rik
0610009O20Rik
0610010B08Rik
0610031J06Rik
1110004E09Rik
1110008L16Rik
1110025L11Rik
1110037F02Rik
1190007I07Rik
1700001F09Rik
1700001L19Rik
1700008F21Rik
1700013G24Rik
1700018F24Rik
1700021F05Rik
1700022I11Rik
1700061G19Rik
1700102P08Rik
1700123I01Rik
1810009A15Rik
1810013L24Rik
1810026J23Rik
1810043H04Rik
2210016L21Rik
2310003H01Rik
2310011J03Rik
2310022A10Rik
2310036O22Rik
2310061I04Rik
2410015M20Rik
2410127L17Rik
2410131K14Rik
2510009E07Rik
2610318N02Rik
2610507B11Rik
2610524H06Rik
2700050L05Rik
2700060E02Rik
2700062C07Rik
2810004N23Rik
2810006K23Rik
2810408M09Rik
2810474O19Rik
2900026A02Rik
3110001D03Rik
3110009E18Rik
3110062M04Rik
3300002I08Rik
3830406C13Rik
4921524J17Rik
4930427A07Rik
4930467E23Rik
4930503E14Rik
4930555G01Rik
4930567H17Rik
4931406B18Rik
4931414P19Rik
4932443I19Rik
4933402J07Rik
4933402N22Rik
5031410I06Rik
6430573F11Rik
9030624G23Rik
9130011E15Rik
A130010J15Rik
A230046K03Rik
A330070K13Rik
A530032D15Rik
Aadacl2
Aagab
Aamp
Aar2
Aars
Aars2
Aasdhppt
Aatf
Abcb10
Abcb7
Abcd4
Abce1
Abcf1
Abcf2
Abhd11
Abi1
Abr
Abt1
Acad9
Acd
Acly
Aco2
Acp1
Acsf2
Acsf3
Acsl4
Actb
Actg1
Actl6a
Actn4
Actr10
Actr1a
Actr1b
Actr2
Actr3
Actr5
Actr6
Actr8
Acvr1b
Adam19
Adam25
Adat2
Adat3
Adck4
Adcy7
Adgrg5
Adhfe1
Adipor1
Adnp
Adnp2
Adrm1
Adsl
Aen
AF366264
Afg3l2
Agfg2
Agk
Agpat2
Agpat6
Agps
Agtpbp1
Ahctf1
Ahcy
Ahdc1
AI118078
AI182371
Aifm1
Ajuba
Ak2
Ak6
Akirin2
Akt2
Aldh18a1
Aldoa
Aldoc
Alg1
Alg11
Alg12
Alg13
Alg14
Alg2
Alg3
Alg5
Alg6
Alg8
Alg9
Alkbh1
Alkbh5
Aloxe3
Alpi
Alyref
Ambra1
Amd1
Amd2
Amotl2
Anapc1
Anapc10
Anapc11
Anapc13
Anapc15
Anapc2
Anapc4
Anapc5
Ankle2
Ankmy2
Ankrd11
Ankrd17
Ankrd49
Anln
Anp32b
Anp32e
Anxa7
Ap1m1
Ap2b1
Ap2m1
Ap2s1
Ap3b1
Ap5z1
Apc
Apex1
Apex2
Api5
Apitd1
Apod
Apol7b
Aprt
Aqr
Arcn1
Arf1
Arf6
Arfip2
Arfrp1
Arglu1
Arhgap19
Arhgap26
Arhgef1
Arhgef15
Arhgef18
Arhgef2
Arhgef7
Arid1a
Arid2
Arid4a
Arih1
Arl1
Arl2
Arl8b
Armc10
Armc12
Armc5
Armc7
Armcx1
Arpc2
Arpc3
Arpc4
Arpp19
Arrdc2
Asap2
Ascc1
Ascc2
Ascc3
Ash2l
Asic5
Asna1
Asns
Asnsd1
Asun
Asxl2
Atad1
Atad2
Atad3a
Atad5
Atat1
Atf1
Atf4
Atf7ip
Atg12
Atg14
Atic
Atl2
Atm
Atmin
Atoh1
Atp12a
Atp13a1
Atp1a1
Atp2a2
Atp2a3
Atp2b1
Atp4b
Atp5a1
Atp5b
Atp5c1
Atp5d
Atp5e
Atp5f1
Atp5g1
Atp5g2
Atp5g3
Atp5h
Atp5j
Atp5j2
Atp5k
Atp5l
Atp5o
Atp5sl
Atp6ap1
Atp6v0b
Atp6v0c
Atp6v0d1
Atp6v1a
Atp6v1b2
Atp6v1c1
Atp6v1d
Atp6v1e1
Atp6v1f
Atp6v1g1
Atp6v1h
Atpaf2
Atr
Atrip
Atrx
Atxn10
Atxn2l
Atxn7l3
AU019823
AU021092
Aup1
Aurka
Aurkaip1
Aurkb
AY761184
Aym1
Azi2
Azin1
B3galt6
B3gat3
B3gnt2
B3gnt5
B430306N03Rik
B4galt1
B4galt7
B9d1
Babam1
Bad
Banf1
Banp
Bap1
Bard1
BC003965
BC005624
BC018507
BC027231
BC030867
BC031181
BC049762
BC052040
BC055324
BC061237
BC107364
BC147527
Bcap29
Bcas2
Bccip
Bcl2l1
Bclaf1
Bcor
Bcs1l
Bdh1
Bdp1
Becn1
Bet1
Birc5
Birc6
Blm
Bloc1s1
Bloc1s2
Bloc1s4
Bms1
Bnip1
Bnip3
Bola3
Bop1
Bora
Bpgm
Bpifa6
Bpifb9b
Bptf
Braf
Brap
Brat1
Brca1
Brca2
Brd1
Brd2
Brd4
Brd8
Brf1
Brf2
Bri3
Brip1
Brix1
Brms1
Brpf1
Btaf1
Btbd6
Btbd9
Btf3
Bub1
Bub1b
Bub3
Bud13
Bud31
Bysl
Bzw1
Bzw2
C030046E11Rik
C130026I21Rik
C1d
C1qbp
C1rb
C330021F23Rik
C330027C09Rik
C87414
Cab39
Cacna1e
Cactin
Cacul1
Cad
Caml
Camsap3
Cand1
Cap1
Caprin1
Capzb
Car11
Carm1
Cars
Cars2
Casc5
Casp8ap2
Cbfa2t2
Cbl
Cbwd1
Cbx1
Cbx2
Cbx3
Cbx7
Ccar1
Ccdc101
Ccdc105
Ccdc110
Ccdc115
Ccdc12
Ccdc124
Ccdc130
Ccdc137
Ccdc155
Ccdc174
Ccdc22
Ccdc59
Ccdc7
Ccdc83
Ccdc84
Ccdc86
Ccdc88c
Ccdc90b
Ccdc94
Ccdc97
Cchcr1
Ccl1
Ccl19
Ccl21a
Ccl27a
Ccl27b
Ccna2
Ccnb1
Ccnb2
Ccnc
Ccnd3
Ccne1
Ccnf
Ccng1
Ccnh
Ccnk
Ccnl1
Ccnl2
Ccnt1
Ccnt2
Ccr1l1
Ccr4
Ccs
Cct2
Cct3
Cct4
Cct5
Cct7
Cct8
Cd209g
Cd2bp2
Cd300lh
Cd34
Cd3eap
Cdan1
Cdc123
Cdc16
Cdc20
Cdc23
Cdc25a
Cdc26
Cdc27
Cdc37
Cdc40
Cdc42
Cdc45
Cdc5l
Cdc6
Cdc7
Cdc73
Cdca2
Cdca3
Cdca4
Cdca5
Cdca8
Cdh1
Cdh11
Cdh26
Cdipt
Cdk1
Cdk10
Cdk11b
Cdk12
Cdk2
Cdk2ap1
Cdk2ap2
Cdk4
Cdk6
Cdk7
Cdk8
Cdk9
Cdpf1
Cds2
Cdt1
Cdv3
Cdyl2
Cebpg
Cebpz
Celf1
Cenpa
Cenpc1
Cenpe
Cenph
Cenpi
Cenpj
Cenpk
Cenpl
Cenpm
Cenpn
Cenpo
Cenpp
Cenpq
Cenpt
Cenpu
Cenpw
Cep120
Cep152
Cep192
Cep350
Cep57
Cep85
Cep95
Cept1
Ces1d
Cfap20
Cfap221
Chaf1a
Chaf1b
Champ1
Chchd1
Chchd2
Chchd3
Chchd4
Chchd5
Chd1
Chd4
Chd8
Chek1
Cherp
Chi3l3
Chmp1a
Chmp2a
Chmp3
Chmp4b
Chmp5
Chmp6
Chmp7
Chordc1
Chp1
Chtf18
Chtf8
Chtop
Ciao1
Ciapin1
Ciart
Cic
Cinp
Cir1
Cirbp
Cirh1a
Cisd1
Cited2
CK137956
Ckap5
Cks1b
Cks2
Clasp2
Clasrp
Clcc1
Clcn6
Cldn18
Clec4a2
Clic4
Clip3
Clmp
Cln8
Clnk
Clns1a
Clp1
Clpb
Clpp
Clpx
Clspn
Clta
Cltc
Cluh
Cma2
Cmc2
Cmip
Cml1
Cmpk1
Cmtm2b
Cmtr1
Cmtr2
Cnn3
Cnot1
Cnot10
Cnot11
Cnot2
Cnot3
Cnot4
Cnot8
Cnppd1
Cntrob
Coa3
Coa4
Coa5
Coa6
Coa7
Cog1
Cog2
Cog3
Cog4
Cog5
Cog6
Cog7
Cog8
Coil
Commd3
Commd4
Commd5
Comtd1
Copa
Copb1
Copb2
Cope
Copg1
Cops3
Cops4
Cops5
Cops6
Cops8
Copz1
Coq10b
Coq2
Coq3
Coq4
Coq5
Coq6
Coq7
Coro1c
Cox10
Cox11
Cox14
Cox15
Cox16
Cox17
Cox18
Cox19
Cox20
Cox4i1
Cox5a
Cox5b
Cox6a1
Cox6b1
Cox6c
Cox7b
Cox7c
Cpox
Cpsf1
Cpsf2
Cpsf3
Cpsf3l
Cpsf4
Cpsf6
Cr1l
Crb3
Crcp
Crebbp
Crkl
Crnkl1
Crocc
Crtc2
Crybb2
Cryge
Cs
Cse1l
Csf1
Csk
Csnk1a1
Csnk2b
Csrnp1
Csrp2bp
Cstb
Cstf1
Cstf2
Cstf3
Ctbp2
Ctc1
Ctcf
Ctdp1
Ctdsp1
Ctdsp2
Ctdspl2
Ctnna1
Ctnnb1
Ctnnbl1
Ctnnd1
Ctps
Ctr9
Ctrc
Ctu1
Ctu2
Cul1
Cul2
Cul3
Cul4b
Cwc15
Cwc22
Cwc25
Cwf19l1
Cwf19l2
Cxcl3
Cxxc1
Cxxc4
Cyb5r4
Cyc1
Cycs
Cyct
Cyfip1
Cyp11b1
Cyp2d40
Cyp3a41a
Cyp4f16
D10Wsu102e
D10Wsu52e
D14Abb1e
D17Wsu92e
D19Bwg1357e
D2hgdh
D2Wsu81e
D830030K20Rik
D8Ertd738e
Dad1
Dap3
Dars
Dars2
Daxx
Dazap1
Dazl
Dbf4
Dbpht2
Dbr1
Dcaf13
Dcaf15
Dcaf7
Dclre1b
Dcp2
Dcps
Dcstamp
Dctn1
Dctn2
Dctn3
Dctn4
Dctn5
Dctn6
Dcun1d3
Dda1
Ddb1
Ddi2
Ddost
Ddx1
Ddx10
Ddx11
Ddx17
Ddx18
Ddx19a
Ddx20
Ddx21
Ddx23
Ddx24
Ddx27
Ddx28
Ddx31
Ddx39
Ddx39b
Ddx3x
Ddx41
Ddx42
Ddx46
Ddx47
Ddx49
Ddx5
Ddx51
Ddx52
Ddx54
Ddx55
Ddx56
Ddx59
Ddx6
Deb1
Defa25
Defa26
Defb37
Degs1
Denr
Derl1
Det1
Dgcr14
Dgcr8
Dhdds
Dhfr
Dhodh
Dhps
Dhrs7b
Dhx15
Dhx16
Dhx29
Dhx30
Dhx33
Dhx35
Dhx36
Dhx37
Dhx38
Dhx8
Diap1
Dicer1
Dido1
Diexf
Dimt1
Dis3
Dis3l
Dkc1
Dlc1
Dld
Dlg1
Dlg4
Dlg5
Dlgap5
Dll1
Dlst
Dmap1
Dmtf1
Dna2
Dnaaf5
Dnaja1
Dnaja2
Dnaja3
Dnajb6
Dnajc11
Dnajc13
Dnajc15
Dnajc17
Dnajc2
Dnajc24
Dnajc8
Dnajc9
Dnlz
Dnm1l
Dnm2
Dnmt1
Dnttip1
Dnttip2
Dock1
Dohh
Dolk
Dolpp1
Donson
Dpagt1
Dpf2
Dph1
Dph2
Dph3
Dph5
Dph6
Dppa4
Dpy30
Dr1
Dram2
Drap1
Drg1
Drg2
Drosha
Dscc1
Dsn1
Dtl
Dtymk
Dusp12
Dusp23
Dusp5
Dut
Dym
Dync1h1
Dync1i2
Dynll1
Dynlrb1
Dynlt1a
Dynlt1b
Dynlt1c
Dynlt1f
Dyrk1a
E130309D02Rik
E2f3
E2f4
E2f6
E4f1
Eaf1
Eapp
Ear2
Ears2
Ebna1bp2
Ecd
Echs1
Ecsit
Ect2
Edc4
Edrf1
Eed
Eef1a1
Eef1e1
Eef1g
Eef2
Eefsec
Efr3a
Eftud1
Eftud2
Egr1
Ehmt1
Ehmt2
Ei24
Eif1
Eif1ad
Eif2ak4
Eif2b1
Eif2b2
Eif2b3
Eif2b4
Eif2b5
Eif2s1
Eif2s2
Eif2s3x
Eif3a
Eif3b
Eif3c
Eif3d
Eif3e
Eif3f
Eif3g
Eif3h
Eif3i
Eif3j1
Eif3j2
Eif3k
Eif3l
Eif3m
Eif4a1
Eif4a3
Eif4b
Eif4e
Eif4e2
Eif4enif1
Eif4g1
Eif4g2
Eif5
Eif5a
Eif5b
Eif6
Elac2
Elavl1
Ell
Elmsan1
Elof1
Elp2
Elp3
Elp4
Elp5
Elp6
Emc1
Emc2
Emc3
Emg1
Eml3
Enkd1
Eno1
Eny2
Ep300
Ep400
Epb4.1l5
Eprs
Ept1
Eral1
Eras
Ercc1
Ercc2
Ercc3
Ercc4
Ercc5
Ercc6l
Erf
Ergic2
Erh
Eri1
Erich1
Ermp1
Esco2
Esd
Esf1
Espl1
Esrrb
Etf1
Etfa
Etfdh
Etnk1
Etohi1
Etv6
Ewsr1
Exo1
Exoc1
Exoc2
Exoc3
Exoc4
Exoc5
Exoc6
Exoc7
Exoc8
Exosc1
Exosc10
Exosc2
Exosc3
Exosc4
Exosc5
Exosc6
Exosc7
Exosc8
Exosc9
Ext1
Ext2
Extl3
Ezh2
F8a
Faf2
Fam102a
Fam103a1
Fam109a
Fam122a
Fam129b
Fam136a
Fam154a
Fam171b
Fam178a
Fam187b
Fam204a
Fam207a
Fam208a
Fam210a
Fam219b
Fam229a
Fam32a
Fam3c
Fam50a
Fam57b
Fam58b
Fam60a
Fam73b
Fam92a
Fam96a
Fam96b
Fam98a
Fam98b
Fanca
Fancb
Fancc
Fancd2
Fance
Fancf
Fancg
Fanci
Fancl
Fancm
Fars2
Farsa
Farsb
Fasn
Fastkd1
Fastkd3
Fastkd5
Fau
Fbl
Fbln5
Fbxl4
Fbxo3
Fbxo34
Fbxo46
Fbxo5
Fbxw11
Fbxw5
Fbxw7
Fcf1
Fdft1
Fdps
Fdx1
Fdx1l
Fdxr
Fech
Fen1
Fgfr1
Fgfr1op
Fh1
Fhl3
Fig4
Fignl1
Fip1l1
Fiz1
Fkbp1a
Fkbp4
Fkbp8
Fkbpl
Flcn
Flii
Flt3
Fn1
Fnbp4
Fnta
Fntb
Foxc1
Foxd3
Foxi2
Foxk1
Foxk2
Foxl1
Foxm1
Foxn2
Foxo1
Foxred1
Frg1
Frrs1l
Frs3
Fsd2
Ftl1
Fto
Ftsj2
Ftsj3
Ftsjd1
Ftsjd2
Fus
Fut2
Fxn
Fzd5
G2e3
G3bp2
G6pdx
Gaa
Gabarapl2
Gabpa
Gabpb1
Gabpb2
Gadd45a
Gadd45gip1
Gak
Galk2
Galnt6
Galntl5
Gapdh
Gar1
Gars
Gart
Gatad2a
Gatad2b
Gatb
Gatc
Gbf1
Gbp6
Gbx2
Gcgr
Gcn1l1
Gcsh
Gemin2
Gemin4
Gemin5
Gemin6
Gemin7
Gemin8
Get4
Gfap
Gfer
Gfm1
Gfm2
Ggnbp2
Ggps1
Gigyf2
Gins1
Gins2
Gins3
Gins4
Gipr
Gja1
Gjd4
Gkn3
Glce
Gle1
Gli2
Glmn
Glo1
Glrx3
Glrx5
Gltp
Gltscr2
Gm10024
Gm10094
Gm10104
Gm10147
Gm10220
Gm10228
Gm10229
Gm10324
Gm10354
Gm10406
Gm10408
Gm10413
Gm10471
Gm10662
Gm10696
Gm10697
Gm10767
Gm10922
Gm11237
Gm11487
Gm11559
Gm11711
Gm11758
Gm12789
Gm129
Gm13139
Gm13157
Gm13212
Gm13242
Gm13251
Gm13275
Gm13276
Gm13288
Gm13290
Gm13306
Gm13871
Gm14151
Gm14295
Gm14305
Gm14308
Gm14322
Gm14325
Gm14345
Gm14346
Gm14347
Gm14391
Gm14393
Gm14434
Gm14440
Gm14496
Gm14501
Gm14632
Gm15097
Gm15114
Gm15127
Gm15284
Gm15292
Gm15299
Gm15319
Gm1604b
Gm16367
Gm16381
Gm16513
Gm17019
Gm1979
Gm1993
Gm20747
Gm20767
Gm20809
Gm20815
Gm20816
Gm20831
Gm20852
Gm20865
Gm21119
Gm21319
Gm21498
Gm21637
Gm21943
Gm21951
Gm2696
Gm2863
Gm2897
Gm2927
Gm2933
Gm2a
Gm3238
Gm3383
Gm3415
Gm3488
Gm3500
Gm3558
Gm3604
Gm3701
Gm3706
Gm4214
Gm4301
Gm4305
Gm4559
Gm4567
Gm4745
Gm4763
Gm4836
Gm4871
Gm4951
Gm5148
Gm5458
Gm5591
Gm561
Gm5622
Gm5640
Gm5662
Gm572
Gm5795
Gm5796
Gm5797
Gm5891
Gm5935
Gm6034
Gm6408
Gm6460
Gm6531
Gm6537
Gm6710
Gm6902
Gm7120
Gm7361
Gm8300
Gm8693
Gm8898
Gm8994
Gm906
Gm9125
Gm9268
Gm9376
Gm9758
Gm9897
Gmcl1l
Gmeb2
Gml
Gmnn
Gmppb
Gmps
Gna11
Gnai2
Gnb1
Gnb1l
Gnb2l1
Gng5
Gnl1
Gnl2
Gnl3
Gnl3l
Gnpat
Golga7
Golph3l
Golt1b
Gon4l
Gosr1
Gosr2
Got2
Gpaa1
Gpatch1
Gpatch4
Gpatch8
Gpbp1
Gpbp1l1
Gpi1
Gpkow
Gpn1
Gpn2
Gpn3
Gpr107
Gpr135
Gpr31b
Gpr89
Gprin2
Gps1
Gps2
Gpx4
Grb2
Grn
Grpel1
Grpel2
Grwd1
Gsdmc
Gspt1
Gsta2
Gtf2a1
Gtf2a2
Gtf2b
Gtf2e1
Gtf2e2
Gtf2f1
Gtf2f2
Gtf2h1
Gtf2h2
Gtf2h3
Gtf2h4
Gtf2h5
Gtf2i
Gtf3a
Gtf3c1
Gtf3c2
Gtf3c3
Gtf3c4
Gtf3c5
Gtf3c6
Gtl3
Gtpbp3
Gtpbp4
Gtpbp6
Gtpbp8
Guk1
H2afj
H2afx
H2afz
H2-D1
H2-Ke2
H2-Q1
H2-Q6
H2-Q7
H2-T22
H2-T23
H3f3a
Hacd2
Hadha
Hadhb
Harbi1
Hars
Hars2
Hat1
Haus1
Haus2
Haus3
Haus4
Haus5
Haus6
Haus7
Haus8
Hax1
Hbs1l
Hccs
Hcfc1
Hcfc1r1
Hdac1
Hdac3
Heatr1
Heatr2
Heatr3
Heatr5b
Hells
Helq
Helz
Hemt1
Herpud1
Hes1
Hexim1
Hexim2
Hgs
Hif1an
Higd2a
Hinfp
Hipk2
Hira
Hist1h2aa
Hist1h2ab
Hist1h2ac
Hist1h2ad
Hist1h2ae
Hist1h2ag
Hist1h2ah
Hist1h2ai
Hist1h2ak
Hist1h2an
Hist1h2ao
Hist1h2ap
Hist1h2ba
Hist1h2bb
Hist1h2bf
Hist1h2bh
Hist1h2bj
Hist1h2bk
Hist1h2bl
Hist1h2bm
Hist1h2bn
Hist1h2bp
Hist1h3a
Hist1h3b
Hist1h3c
Hist1h3d
Hist1h3e
Hist1h3f
Hist1h3g
Hist1h3h
Hist1h3i
Hist1h4a
Hist1h4b
Hist1h4c
Hist1h4d
Hist1h4f
Hist1h4h
Hist1h4i
Hist1h4j
Hist1h4k
Hist1h4m
Hist1h4n
Hist2h2aa1
Hist2h2aa2
Hist2h2ab
Hist2h2ac
Hist2h2bb
Hist2h2be
Hist2h3b
Hist2h3c1
Hist2h3c2
Hist2h4
Hist3h2ba
Hist3h2bb-ps
Hist4h4
Hjurp
Hk2
Hltf
Hmbs
Hmg20a
Hmgb1
Hmgb2
Hmgcr
Hmgcs1
Hmgn1
Hmgn2
Hmgxb3
Hmox1
Hnrnpa1
Hnrnpa3
Hnrnpc
Hnrnpf
Hnrnpk
Hnrnpl
Hnrnpu
Hnrnpul2
Hoxa4
Hoxd10
Hpcal1
Hras
Hscb
Hsd17b10
Hsd17b12
Hsf2
Hsp90ab1
Hsp90b1
Hspa14
Hspa4
Hspa4l
Hspa5
Hspa8
Hspa9
Hspd1
Hspe1
Htatip2
Htatsf1
Hus1
Huwe1
Hyls1
Hyou1
Hypk
Iars
Iars2
Iba57
Ice1
Ice2
Icmt
Ict1
Id1
Idh3a
Idh3b
Idi1
Idi2
Ier2
Ier3ip1
Ifna2
Ifna6
Ifnab
Ifnz
Ift74
Ift80
Igbp1
Igf2bp1
Igsf21
Ik
Ikbkap
Il12rb1
Il23r
Il6st
Ilf2
Ilf3
Immt
Imp3
Imp4
Impa1
Impdh2
Inadl
Incenp
Ing1
Ing2
Ing3
Ing4
Ing5
Ino80
Ino80b
Ino80d
Inpp1
Ints1
Ints10
Ints12
Ints2
Ints3
Ints4
Ints5
Ints6
Ints7
Ints8
Ints9
Ip6k1
Ipmk
Ipo11
Ipo13
Ipo4
Ipo5
Ipo7
Ipo9
Iqgap1
Isca1
Isca2
Iscu
Isg20l2
Isy1
Itga3
Itgb1
Itln1
Itpa
Iws1
Jak1
Jarid2
Jmjd1c
Jmjd6
Jmjd8
Jtb
Kansl1
Kansl2
Kansl3
Kars
Kat5
Kat6a
Kat6b
Kat7
Kat8
Katna1
Katnb1
Kcnab3
Kcnc3
Kcnk5
Kctd10
Kctd13
Kctd18
Kctd7
Kdm1a
Kdm2a
Kdm4a
Kdm4c
Kdm5b
Kdm5c
Kdm8
Kdsr
Keap1
Khdrbs1
Khsrp
Kidins220
Kif11
Kif14
Kif15
Kif18a
Kif18b
Kif20a
Kif20b
Kif22
Kif23
Kif2c
Kif4
Kifc1
Kifc5b
Kin
Kiss1r
Klb
Klf2
Klf4
Klf5
Klhdc10
Klk1
Klk1b27
Klrb1a
Kmt2a
Kmt2b
Kmt2d
Knstrn
Kntc1
Kpna1
Kpna2
Kpna6
Kpnb1
Kras
Kri1
Krr1
Krt39
Krt79
Krtap19-5
Krtap20-2
Krtap22-2
Krtap4-1
Krtap4-13
Krtap4-2
Krtap4-8
Krtap4-9
Krtap5-2
Krtap5-3
Krtap5-4
Krtap6-1
Krtap6-5
Kti12
Kxd1
L1td1
L3hypdh
L3mbtl2
L3mbtl3
l7Rn6
Lage3
Lama1
Lamtor1
Lamtor2
Lamtor3
Lamtor4
Lamtor5
Larp1
Larp4
Lars
Lars2
Las1l
Lats1
Lcat
Lce1a1
Lce1a2
Lce1c
Lce1d
Lce1e
Lce1g
Lce1j
Lce1k
Lce1l
Lce3c
Lcmt1
Ldb1
Ldha
Lemd2
Leng1
Leng8
Leo1
Letm1
Lgals12
Lhx4
Lias
Lifr
Lig1
Lig3
Lig4
Lima1
Lims1
Lin37
Lin52
Lin54
Lin9
Lins
Liph
Lipt1
Lipt2
Llph
Lmf1
LOC100048884
LOC100861615
Lonp1
Lpcat3
Lrch4
Lrp5
Lrp6
Lrpprc
Lrr1
Lrrc36
Lrrc57
Lrrc69
Lrsam1
Lsg1
Lsm1
Lsm10
Lsm11
Lsm12
Lsm14a
Lsm2
Lsm3
Lsm4
Lsm5
Lsm6
Lsm7
Lsm8
Lsmd1
Lta4h
Ltb4r2
Ltv1
Luc7l3
Ly6c2
Lyar
Lyn
Lypd6b
Lyrm2
Lyrm4
Lztfl1
Lztr1
Lzts3
Mad1l1
Mad2l1
Mad2l1bp
Mad2l2
Mafg
Magea1
Magea2
Magoh
Mak16
Malsu1
Map1s
Mapk1
Mapk14
Mapk1ip1l
Mapkap1
Mapre1
March5
March9
Mark2
Mars
Mars2
Mastl
Mat2a
Matr3
Mau2
Max
Maz
Mbd3
Mbip
Mbtd1
Mbtps1
Mbtps2
Mcat
Mcl1
Mcm10
Mcm2
Mcm3
Mcm3ap
Mcm4
Mcm5
Mcm6
Mcm7
Mcm8
Mcm9
Mcmbp
Mcph1
Mcrs1
Mcu
Mcur1
Mdc1
Mdh2
Mdm2
Mdm4
Mdn1
Meaf6
Mecr
Med10
Med11
Med12
Med13l
Med14
Med15
Med16
Med17
Med18
Med19
Med20
Med21
Med22
Med23
Med24
Med25
Med26
Med27
Med28
Med29
Med30
Med31
Med4
Med6
Med7
Med8
Med9
Mepce
Metap1
Metap2
Mettl1
Mettl14
Mettl15
Mettl16
Mettl17
Mettl21a
Mettl3
Mfap1a
Mfap1b
Mfap5
Mff
Mfn1
Mfn2
Mga
Mgat1
Mgea5
Mif
Mina
Minos1
Mios
Mipep
Mis12
Mis18a
Mis18bp1
Mitd1
Mki67
Mki67ip
Mlf1ip
Mlh1
Mllt1
Mlst8
Mlx
Mlxip
Mmachc
Mmadhc
Mmp15
Mms19
Mms22l
Mnat1
Mnf1
Mob4
Mocs3
Mogs
Morc2a
Morc3
Morf4l2
Mphosph10
Mphosph6
Mphosph8
Mprip
Mpv17l2
Mre11a
Mrgbp
Mrgprd
Mrp63
Mrpl1
Mrpl10
Mrpl11
Mrpl12
Mrpl13
Mrpl14
Mrpl15
Mrpl16
Mrpl17
Mrpl18
Mrpl19
Mrpl2
Mrpl20
Mrpl21
Mrpl22
Mrpl23
[truncated: 2,059 more rows]

## Sheet: Pathway terms
Primary classification	Secondary classification	Function terms	Known or not	Genelist
Cellular Processes	Cell growth and death	PANTHER_MM_P53_PATHWAY	Known	PIK3CD,CCNB1,GADD45B,TRP73,PPP2CB,TPTE,PERP,CD82,PDPK1,PIK3R2,PIK3R3,TRAF2,MDM4,MDM2,SIAH1A,ATR,TRP53,SERPINE1,BAI3,BAI2,TNFRSF10B,CHEK2,RPRM,EP300,IGFBP3,PPM1D,PIK3C3,GADD45A,AKT3,SERPINB5,ZMAT3,GM4694,PIK3R1,CCNE1,CREBBP,CCNG1,SFN,GM10093,GTSE1,CDKN2D,PIK3CB,GADD45G,TRP63,HMGB1,PIK3C2A,PPP2CA,FAS,CDKN1A,AKT1,PML,SUMO1,CDC25A,CDC25C,HDAC1,BAX,ATM,MTA2,AKT2,AIFM2,PIK3C2G,SUMO3,CDK2,RRM2,PIK3CA,SI…
	Cell growth and death	WIKIPATHWAYS_MM_Cell_Cycle-Wp179	Not known	HDAC6,HDAC5,CDK2,CDK4,CDK6,CDKN1A,CDKN1B,CDKN2A,MAD2L2,DBF4,GM2423,CHEK1,TBC1D8,CHEK2,GADD45A,E2F1,E2F2,E2F3,E2F4,E2F5,E2F6,EP300,MPEG1,ORC6,ORC3,ABL1,GSK3B,HDAC1,HDAC2,ARF1,MAD2L1,SMAD3,SMAD4,MCM2,MCM3,MCM4,MCM5,MCM6,MCM7,MDM2,MEN1,KITL,ATM,ORC1,ORC2,ORC4,ORC5,PCNA,HDAC7,PLK1,MCM10,HDAC8,PRKDC,RB1,RBL1,SKP2,BUB1,BUB1B,TFDP1,TGFB1,TRP53,WEE1,YWHAB,YWHAE,YWHAG,YWHAH,YWHAZ,SMC1A,CDC7,CDC45,MAD1L1,M…
	Cell growth and death	WIKIPATHWAYS_MM_G1_To_S_Cell_Cycle_Control-Wp45	Not known	CDK2,CDK4,CDK6,CDK7,CDKN1A,CDKN1B,CDKN1C,CDKN2A,CDKN2B,CDKN2C,CREB3,CREB1,ATF6B,CREB3L4,GADD45A,E2F1,E2F2,E2F3,E2F4,E2F5,E2F6,ORC6,ORC3,POLA2,MCM2,MCM3,MCM4,MCM5,MCM6,MCM7,MDM2,MNAT1,MYC,ATF1,MYT1,ATM,ORC1,ORC2,ORC4,ORC5,PCNA,POLE,POLE2,PRIM1,PRIM2,RB1,RBL1,CCND1,RPA2,RPA3,TFDP1,TFDP2,TRP53,WEE1,CDC45,CREB3L3,CCNA1,CCND2,CCND3,CCNE1,CCNG2,CCNH,CREB3L1,CCNE2,CDK1,CDC25A
Environmental Information Processing	Signal transduction	INOH_MM_JAK_STAT_Pathway_And_Regulation	Known	PSMD11,PSMD12,PSMD9,BMPR1B,CDC7,SOCS7,SOCS3,SOCS6,MAP2K7,PSMA7,IKBKB,CHUK,MAPK13,SOCS1,PDPK1,IRAK2,PSMD3,MAP3K13,MAP3K7,RIPK2,PRKAB2,JAK2,SOCS5,PSMD10,PAK4,EGFR,MOS,NRAS,HRAS1,KRAS,LTA,TNF,IFNB1,IFNG,IL1A,IL1B,EPO,IL2RA,RAF1,CSF2,NTRK1,IL4,IL5,PRKCG,IL6,PRKCB,INSR,LCK,FYN,CDK1,IGF1R,NGFR,MET,IL6RA,PDGFRB,CSF3,ARAF,PRKAR1A,KIT,GHR,FGFR1,CDK4,SRC,IL7,PRKAR2A,IL1R1,IL2RB,LIF,BRAF,IL9,IFNGR1,CSF2RA,P…
	Signal transduction	WIKIPATHWAYS_MM_Wnt_Signaling_Pathway_And_Pluripotency-Wp399	Known	ZBTB33,FRAT1,FZD10,CREBBP,CSNK1E,CTBP1,CTBP2,CTNNB1,CTNND1,DVL1,DVL2,DVL3,EP300,ESRRB,FZD2,FBXW2,FOXD3,RACGAP1,GSK3B,APC,PPM1J,JUN,RHOA,LDLR,LRP6,LRP5,MMP7,MYC,NFYA,PAFAH1B1,LEF1,WNT16,NLK,PLAU,WNT4,POU5F1,PPARD,PPP2CA,PPP2CB,PPP2R1A,PPP2R1B,PPP2R2A,PPP2R2B,PPP2R2C,PPP2R3A,PPP2R4,PPP2R5C,PPP2R5E,PRKCA,PRKCB,PRKCD,PRKCE,PRKCH,PRKCI,PRKD1,PRKCQ,PRKCZ,MAPK9,MAPK10,CCND1,SOX2,MAP3K7,TCF7,TCF7L2,TRP53…
	Signal transduction	NETPATH_MM_TNFalpha_Signaling_Pathway	Not known	ACTL6A,AIMP2,AKAP8,AKT1,AKT2,ALPL,APAF1,ARHGDIA,ARHGEF1,ARHGEF2,ATF2,BAG4,BAX,BCL2,BCL2L1,BCL3,BCL7A,BID,BIRC2,BIRC3,BTRC,CASP2,CASP3,CASP7,CASP8,CASP9,CAV1,CCNT1,CDC34,CDC37,CDK5,CDK9,CFL1,CFLAR,CHUK,COPB2,COPS3,COPS5,CRADD,CREB1,CREBBP,CRYAB,CSNK1A1,CUL1,CYBA,CYBB,DAB2IP,DBC1,DCAF7,DDX21,DDX3X,DIABLO,DOK1,DPF2,EED,EGFR,EIF2S1,EIF4EBP1,EIF6,EP300,ERBB2,ERBB3,EZR,FADD,FAF1,FANCD2,FBL,FBXW11,FBXW7…
	Signal transduction	WIKIPATHWAYS_MM_EGF_EGFR_Signaling_Pathway-Wp437	Known	ABI1,TNK2,SPRY2,STAM2,PIAS3,VAV3,STAMBP,CFL1,MAP3K2,RALBP1,MAP4K1,AP2M1,AP2S1,CREB1,CRK,CRKL,MAPK14,CSK,AP2A1,AP2B1,DNM1,E2F1,EGF,EGFR,ELK1,ELK4,EPS8,EPS15,ERBB2,AKT1,PTK2B,FOXO1,FOS,FOSB,CBLC,ABL1,RICTOR,GAB1,GJA1,GRB2,EPN1,SH3KBP1,INPP5D,INPPL1,JAK1,JAK2,JUN,JUND,ARF6,KRAS,LIMK2,MAP3K1,MAP3K3,MAP3K4,FOXO4,MYBL2,NCK1,NEDD8,PEBP1,NDUFA13,PCNA,PLCE1,PDPK1,PIK3C2B,PIK3R1,PIK3R2,PLCG1,PLD1,PLSCR1,ER…
	Signal transduction	INOH_MM_VEGF	Not known	BMPR1B,CDC7,PIK3CD,PIK3R2,MAP2K7,IKBKB,CHUK,MAPK13,PDPK1,IRAK2,MAP3K13,MAP3K7,RIPK2,PRKAB2,FIGF,JAK2,PAK4,EGFR,MOS,RAF1,NTRK1,PRKCG,PRKCB,INSR,LCK,FYN,CDK1,IGF1R,NGFR,MET,PDGFRB,ARAF,PRKAR1A,KIT,FGFR1,CDK4,SRC,PRKAR2A,BRAF,VEGFA,PDGFRA,PLCG2,PRKCA,PRKACA,FLT1,PLCG1,ELK1,FGFR2,FGFR4,FGFR3,PRKACB,JAK1,PRKCH,CDK2,ADRBK1,ACVR2A,MAPK3,PIK3R1,MAPK1,LTK,TYK2,WEE1,PRKAR1B,PRKAR2B,AKT1,AKT2,GRK4,RYK,GRK5,…
	Signal transduction	WIKIPATHWAYS_MM_MAPK_SIGNALING_PATHWAY-WP382	Known	AKT3,RASGRP1,TAB1,MAP4K1,DUSP10,RASGRP4,ACVR1C,MAP3K8,ATF2,CRK,CRKL,TMEM37,MAPK14,DAXX,GADD45A,DDIT3,DUSP4,DUSP5,DUSP6,DUSP7,EGF,EGFR,ELK1,AKT1,AKT2,FGF4,MRAS,TAB2,FLNA,MAPK8IP3,FOS,GCK,GNA12,GRB2,NR4A1,HSPA5,HSPA8,HSPB1,HSPB2,FAS,IKBKB,IL1A,IL1B,IL1R1,FASL,JUN,JUND,KRAS,ARRB1,ARRB2,MAX,MEF2C,MAP3K1,MAP3K4,MAP3K5,MAP3K11,MOS,MYC,ATF4,NF1,NFKB1,NGF,NRAS,NTF5,NTRK1,MINK1,PAK1,PAK2,ECSIT,PDGFB,PDGFR…
	Signal transduction	NETPATH_MM_TGFBETA_RECEPTOR_SIGNALING_PATHWAY	Known	ABL1,ACVRL1,AKT1,ANAPC1,ANAPC10,ANAPC2,ANAPC4,ANAPC5,ANAPC7,AP2B1,AR,ARRB2,ATF2,ATF3,AXIN1,AXIN2,BCAR1,BRCA1,BTRC,CAMK2A,CAMK2B,CAMK2D,CAMK2G,CAV1,CCNB2,CCND1,CCNE1,CD44,CDC16,CDC23,CDC25A,CDC25C,CDC27,CDK1,CDK2,CDK4,CDK6,CDKN1A,CHUK,CITED1,COPS5,CREBBP,CRK,CSNK1G2,CTCF,CTNNA1,CTNNA2,CTNNB1,CUL1,DAB2,DAXX,DCP1A,DDX5,DVL1,DYNC1I1,DYNLRB1,DYNLRB2,E2F4,E2F5,EID2,EIF3I,EIF4EBP1,ENG,EP300,ERBB2IP,ESR1…
Genetic Information Processing	Folding, sorting and degradation	WIKIPATHWAYS_MM_PROTEASOME_DEGRADATION-WP183	Not known	PSME3,H2AFX,H2AFZ,H2-Q10,H2-M5,H2-M3,IFNG,NEDD4,PSMA1,PSMA2,PSMA3,PSMA4,PSMA5,PSMA6,PSMA7,PSMB1,PSMB2,PSMB3,PSMB4,PSMB5,PSMB6,PSMB7,PSMB8,PSMB9,PSMB10,PSMC1,PSMC2,PSMC3,PSMC4,PSMC5,PSMC6,PSMD1,PSMD2,PSMD3,PSMD4,PSMD5,PSMD7,PSMD8,PSMD9,PSMD10,PSMD11,PSMD12,PSMD13,PSME1,PSME2,RPN1,RPN2,UBC,UBA1,UBA7,UBE2B,UBE2D1,UBE2D3,UCHL1,UCHL3,PSMD6
	Folding, sorting and degradation	PANTHER_MM_UBIQUITIN_PROTEASOME_PATHWAY	Not known	PSMD4,UBA1,NEDD4,WWP1,UBE2D4,UBA3,UBE2N,UBE2L6,ITCH,UBE2C,UBE2NL,UBE3B,UBE2B,UBE2V2,PSMD14,UBE3C,UBE2D2B,PSMD13,UBA2,UBE2D3,SMURF1,UBE2D1,SMURF2,UBE2K,GM5830,WWP2,UBE2S,ATG7,UBE2G1,SAE1,UBE2E3,PSMD2,UBE2E1,UBE3A,UBE2L3,UBE2A,PSMD1,UBE2G2,UBE2D2A,UBE2E2,PSMC4
	Replication and repair	WIKIPATHWAYS_MM_DNA_Replication-Wp466	Not known	CDK2,POLD3,DBF4,ORC6,ORC3,POLA2,MCM2,MCM3,MCM4,MCM5,MCM6,MCM7,ORC1,ORC2,ORC4,ORC5,GMNN,PCNA,POLA1,POLD1,POLD2,POLE,POLE2,MCM10,PRIM1,PRIM2,POLD4,RFC1,RFC2,RFC3,RFC4,RFC5,RPA2,RPA3,UBC,CDT1,CDC7,CDC45,CDC6
	Transcription	WIKIPATHWAYS_MM_Eukaryotic_Transcription_Initiation-Wp405	Not known	CDK7,POLR3H,ERCC2,ERCC3,POLR1A,GTF2A2,GTF2B,GTF2E1,GTF2E2,GTF2F2,GTF2H1,GTF2H2,GTF2H3,GTF2H4,ILK,MNAT1,POLR1D,POLR3K,POLR2A,POLR2B,POLR2C,POLR2E,POLR2F,POLR2G,POLR2H,POLR2I,POLR2J,POLR2K,POLR3B,POLR3E,SLC35G3,POLR1E,POLR3D,TAF5,TAF6,TAF7,TAF9,TAF12,TAF13,TBP,POLR1B,CCNH
	Transcription	PANTHER_MM_General_Transcription_Regulation	Not known	POLR2F,GTF2F2,BRF2,TAF9B,GTF2A1,TAF6,POLR2H,BRF1,TAF9,GTF2H3,GTF2H4,GTF2A1L,MTERF,GTF2B,TAF7L,TAF7,GTF2E1,TBPL1,GTF2E2,TTF1,GTF2A2,TAF8,TAF2,TAF12,GTL3,GTF2H1,POLR2E,TAF11,TAF1C,GTF2F1,GM9897
	Transcription	PANTHER_MM_Transcription_Regulation_By_Bzip_Transcription_Factor	Not known	TBPL1,GTF2F2,GTF2A2,PRKAR1A,GTF2H1,TAF1C,CREM,PRKAR1B,PRKAR2A,TAF9B,GTF2E2,TAF2,CREB3L4,CREB3L2,POLR2L,CREB3L3,PRKAR2B,TAF7L,TTF1,POLR2H,GTF2E1,GTF2F1,GTL3,BRF1,POLR2F,CREB3L1,GTF2H4,TAF9,EP300,GTF2A1,GM10774,TAF8,POLR2E,TAF6,TBPL2,TAF12,GM9897,CREB3,GTF2A1L,CREBBP,TAF7,GTF2H3,MTERF,BRF2,GTF2B,TAF11
	Translation	WIKIPATHWAYS_MM_Translation_Factors-Wp107	Not known	EIF1,PAIP1,EEF1A2,EEF1B2,EEF1D,EEF1G,EEF2,EIF1AX,EIF2S1,EIF2B1,EIF2S3X,EIF4A1,EIF4A2,EIF4B,EIF4E,EIF4EBP1,EIF4EBP2,EIF4G1,EIF5,EIF5A,ETF1,CLUH,GSPT2,PABPC1,EIF2AK1,EEF2K,EIF3E,EIF6,EIF2AK2,EIF4H,EIF4EBP3,EIF3A,EIF3B,EIF3C,EIF3D,EIF3F,EIF3G,EIF3H,EIF3I,EIF4G3,EIF2B4,EIF2B3,EIF2B2,EIF2B5,EIF1A,EIF2AK3,EIF5B
	Translation	WIKIPATHWAYS_MM_mRNA_Processing-Wp411	Not known	GM14277,SRSF10,SUGP2,RBM5,HNRNPR,SRRM1,SF3B4,SF3A1,CD2BP2,NXF1,PRPF8,CELF1,CELF2,CPSF4,TXNL4A,PAPOLA,RNPS1,SF3A3,CLP1,SF3B2,NUDT21,CLASRP,DDX20,CLK1,CLK2,CLK3,SREK1,CSTF1,CSTF2,CSTF3,DDX1,DHX8,DHX9,DHX15,XRN2,DNAJC8,NCBP2,CSTF2T,DICER1,SF3B3,SF3B1,PRPF6,FUS,RBMX,CPSF1,HNRNPA1,HNRNPA2B1,HNRNPAB,HNRNPC,HNRNPD,HNRNPH1,HNRNPH2,HNRNPK,HNRNPL,HNRNPU,PRMT2,PRMT1,HNRNPM,NCBP1,NONO,YBX1,PCBP2,CDC40,CPSF3,…
	Translation	WIKIPATHWAYS_MM_Cytoplasmic_Ribosomal_Proteins-Wp477	Not known	RPL13A,RPS6KA6,RPSA,RPL4,RPL7,RPL9-PS7,RPL11,RPL12-PS1,RPL13-PS3,GM4294,RPL17,RPL18,RPL18A,RPL19,GM11703,RPL22,RPL24,RPL26,RPL32,RPL37,RPL38-PS1,RPL39,RPLP1,RPLP2,RPS3,RPS4X,GM9294,RPS5,RPS6KA1,RPS6KA2,RPS6KA3,RPS6KB2,RPS7,RPS9,RPS10,RPS11,RPS12-PS1,RPS14,RPS15-PS2,RPS15A,RPS16,RPS18,RPS19,RPS21,GM4832,RPS25,RPS26,GM8430,RPL23,MRPL19
Metabolism	Membrane transport	WIKIPATHWAYS_MM_Electron_Transport_Chain-Wp111	Not known	COX17,COX4I1,COX6A1,COX6A2,COX6B1,COX7A1,COX7A2,COX7B,COX8A,COX11,COX15,UQCRQ,ATP5S,SLC25A4,GM5560,SLC25A5,UQCR10,NDUFS7,UQCRH,ATP6,COX1,COX2,COX3,CYTB,ND1,ND2,ND3,ND4,ND4L,ND5,ND6,NDUFA1,NDUFA2,NDUFA3,NDUFA4,NDUFA5,NDUFA6,NDUFA7,NDUFA8,NDUFA9,NDUFA10,NDUFB2,NDUFB3,NDUFB5,NDUFB6,NDUFB7,NDUFB8,NDUFB9,NDUFB10,NDUFC1,NDUFC2,NDUFS1,NDUFS2,NDUFV1,NDUFS4,NDUFS5,NDUFS8,NDUFV2,NDUFV3,ATP5A1,ATP5B,ATP5C1,…
	Energy metabolism	WIKIPATHWAYS_MM_Oxidative_Phosphorylation-Wp623	Not known	ATP6AP2,ATP5S,NDUFS7,ATP6,ND1,ND2,ND3,ND4,ND4L,ND5,ND6,NDUFA2,NDUFA3,NDUFA4,NDUFA5,NDUFA6,NDUFA7,NDUFA8,NDUFA9,NDUFA10,NDUFB2,NDUFB5,NDUFB6,NDUFB7,NDUFB8,NDUFB9,NDUFB10,NDUFC1,NDUFC2,NDUFS1,NDUFS2,NDUFV1,NDUFS4,NDUFS5,NDUFS8,NDUFV2,NDUFV3,ATP5A1,ATP5B,ATP5D,ATP5F1,ATP5G3,ATP5K,ATP5J,ATP6AP1,NDUFA4L2,ATP5J2
Organismal Systems	Endocrine system	NETPATH_MM_Androgen_Receptor_Signaling_Pathway	Not known	AES,AHR,AKT1,AKT2,AR,ARNT,ATF2,BAG1,BRCA1,CALR,CASP1,CASP3,CASP7,CASP8,CAV1,CCND1,CCND3,CCNE1,CCNH,CDC25A,CDC25B,CDC37,CDK1,CDK11B,CDK5,CDK7,CDK9,CEBPA,CREB1,CREBBP,CTDP1,CTNNB1,DAPK3,DAXX,DBC1,DBT,DDC,DDX5,EFCAB6,EGFR,EP300,ERCC2,ERCC3,ESR1,ESR2,ETV5,FHL2,FKBP4,FLNA,FOXA1,FOXO1,GM13882,GHR,GNB2L1,GSK3B,GSN,GTF2F1,GTF2F2,GTF2H1,GTF2H2,GTF2H3,GTF2H4,LAMTOR5,HDAC1,HDAC7,HIPK3,HMG1L1,HMGB2,HRAS1,HSP…
	Circulatory system	INOH_MM_Epo_Signaling	Not known	BMPR1B,CDC7,PIK3CD,PIK3R2,MAP2K7,IKBKB,CHUK,MAPK13,PDPK1,IRAK2,MAP3K13,MAP3K7,RIPK2,PRKAB2,JAK2,PAK4,EGFR,MOS,EPO,RAF1,NTRK1,PRKCG,PRKCB,INSR,LCK,FYN,CDK1,IGF1R,NGFR,MET,PDGFRB,ARAF,PRKAR1A,KIT,FGFR1,CDK4,SRC,PRKAR2A,BRAF,PDGFRA,PRKCA,PRKACA,FLT1,EPOR,FGFR2,FGFR4,FGFR3,PRKACB,JAK1,PRKCH,CDK2,ADRBK1,ACVR2A,GM2423,MAPK3,PIK3R1,MAPK1,LTK,TYK2,WEE1,PRKAR1B,PRKAR2B,AKT1,AKT2,GRK4,RYK,GRK5,ADRBK2,FLT4,…
	Endocrine system	INOH_MM_Insulin	Not known	PIK3CD,PIK3R2,IRS4,PDPK1,EIF4G3,FOXO3,PRKAB2,NRAS,HRAS1,KRAS,INS2,RAF1,INSR,EIF4E,ARAF,GYS1,SLC2A4,BRAF,ELK1,GM2423,MAPK3,PIK3R1,MAPK1,SHC1,PPP2R1A,PPP2R1B,AKT1,AKT2,YWHAB,SFN,IRS1,MAP2K2,PIK3CA,PIK3CB,MTOR,TSC2,GSK3B,PRKAG1,PRKAA2,GYS2,PTEN,EIF4A1,YWHAG,YWHAE,FKBP1A,GRB2,YWHAZ,SHC2,FOXO4,PPP2R2B,MAP2K1,EIF4G1,YWHAH,PPP2R3A,SOS1,SOS2,FOXO1,PRKAA1,PPP2R5C,EIF4EBP1,EIF4A2,PPP2R5D,PPP2R5A,PPP2R5B,PP…
	Immune system	NETPATH_MM_B_Cell_Receptor_Signaling_Pathway	Not known	AKT1,ATF2,ATP2B4,BANK1,BAX,BCAR1,BCL10,BCL2,BCL2L11,BCL6,BCR,BLK,BLNK,BRAF,BTK,BTLA,CARD11,CASP3,CASP7,CASP9,CBL,CBLB,CCL4,CCNA2,CCND2,CCND3,CCNE1,CD19,CD22,CD5,CD72,CD79A,CD79B,CD81,CDK2,CDK4,CDK6,CDK7,CHST15,CHUK,CMTM3,CR2,CREB1,CRK,CRKL,CSK,CTNNB1,GM10108,DAPP1,DBNL,DNM2,DOK1,DOK3,EIF4EBP1,ELK1,FCGR2B,FOS,FOSB,FOXO1,FOXO3,FYN,GAB1,GAB2,GRB2,GSK3A,GSK3B,GTF2I,HCK,HCLS1,HDAC5,HDAC7,HNRNPK,HRAS1,…
	Immune system	NETPATH_MM_T_Cell_Receptor_Signaling_Pathway	Not known	ABI1,ABL1,ACBD6,ACLY,ACP1,ACTA1,ACTR10,ADA,ADAM9,AHCY,AKT1,ANXA11,ANXA2,ARHGDIB,ARHGEF2,ARHGEF6,ARHGEF7,ATF2,ATP1A1,ATP1A3,BCL10,BDH1,BMF,BRAF,CABIN1,GM7308,CARD11,CASKIN2,CBL,CBLB,CCT8,CD2,CD247,CD28,CD2AP,CD3D,CD3E,CD3G,CD4,CD5,CD7,CD80,CD82,CD84,CD86,CD8A,CDK1,CEBPB,CGN,CHUK,CISH,CLTC,CREB1,CREBBP,CRK,CRKL,CTLA4,CTNNB1,CYFIP1,DAPK1,DBNL,DDX3X,DDX49,DEF6,DGKA,DIAP1,DLG1,DNAJB1,DNM2,DOCK2,DOK1,D…
	Immune system	NETPATH_MM_Thymic_Stromal_Lymphopoietin_Signaling_Pathway	Not known	ADD1,ADD2,ADD3,AGFG1,APPL1,ARHGAP21,ATF2,ATF7,BOD1L,BRD4,BTK,CAD,GM7308,CAMSAP1,CCL17,CCL22,CDV3,CIC,CLASP2,CLPTM1L,CRLF2,CSNK1D,CTNND1,DAG1,DLG1,DNER,DOCK10,EDC4,EEF2,EIF4EBP1,EPRS,ETV3,FAP,FES,FOXO3,GATAD2B,GPSM3,HCFC1,HCK,H2-EB1,HPD,HPSE2,HSP90AA1,IL7R,INPPL1,IRF2BPL,ITGB3,JAK1,JAK2,JUNB,KDM3B,LCP1,LDLRAP1,LMNA,LPP,MADD,MAP2K1,MAP2K2,MAPK1,MAPK10,MAPK12,MAPK14,MAPK3,MAPK8,MAPK9,MED24,MPRIP,NAV…
	Immune system	INOH_MM_IL-7_Signaling	Not known	BMPR1B,CDC7,PIK3CD,PIK3R2,MAP2K7,IKBKB,CHUK,MAPK13,PDPK1,IRAK2,MAP3K13,MAP3K7,RIPK2,PRKAB2,JAK2,PAK4,EGFR,MOS,RAF1,NTRK1,PRKCG,PRKCB,INSR,LCK,FYN,CDK1,IGF1R,NGFR,MET,PDGFRB,ARAF,PRKAR1A,KIT,FGFR1,CDK4,SRC,IL7,PRKAR2A,BRAF,PDGFRA,IL7R,PRKCA,PRKACA,FLT1,FGFR2,FGFR4,FGFR3,PRKACB,JAK1,PRKCH,CDK2,ADRBK1,ACVR2A,GM2423,MAPK3,PIK3R1,MAPK1,LTK,TYK2,WEE1,PRKAR1B,PRKAR2B,AKT1,AKT2,IL2RG,GRK4,RYK,GRK5,ADRBK2…
	Immune system	NETPATH_MM_IL6_Signaling_Pathway	Not known	AKT1,AR,BAD,BMX,BTK,CASP3,CASP9,CBL,CD40,CDK5,CDK9,CEBPB,CREBBP,DAXX,EIF2A,EIF4E,EIF4EBP1,EP300,ERBB2,ERBB3,FES,FGR,FOS,FOXO1,FOXO3,FYN,GAB1,GAB2,GRB2,GSK3B,HCK,HDAC1,HNF1A,HNRNPA1,HRAS1,HSP90AA1,HSPB1,IL6,IL6RA,IL6ST,INPP5D,INPPL1,JAK1,JAK2,JUN,LYN,MAP2K1,MAP2K2,MAP2K4,MAP2K6,MAP3K4,MAP3K7,MAPK1,MAPK14,MAPK3,MAPK8,MAPKAPK2,NCOA1,NFKB1,NFKBIA,NLK,PIAS3,PIK3R1,PIK3R2,PLCG1,PRKCD,PTK2,PTK2B,PTPN11,…
