# Supplementary material for: A multi-omics integrative analysis based on CRISPR screens re-defines the pluripotency regulatory network in ESCs
Source: Research Square preprint supplement (doi:10.21203/rs.3.rs-951395/v1), 2023-03-13
Supplement: Supplementary file 6 [file Supplementary Data7.xlsx]

## Sheet: 486 Raw data
GEO series	GEO accession	SRR data	Gene	Reference
GSE102753	GSM2746092	SRR5941630	EED	Li Y, Zheng H, Wang Q, Zhou C et al. Genome-wide analyses reveal a role of Polycomb in promoting hypomethylation of DNA methylation valleys. Genome Biol 2018 Feb 8;19(1):18. PMID: 29422066
	GSM2899074	SRR6413025	EED
GSE111264	GSM3318684	SRR7643337	ARID1A	Gatchalian J, Malik S, Ho J, Lee DS et al. A non-canonical BRD9-containing BAF chromatin remodeling complex regulates naive pluripotency in mouse embryonic stem cells. Nat Commun 2018 Dec 3;9(1):5139. PMID: 30510198
	GSM3318685	SRR7643338	ARID1A
	GSM3318693	SRR7643346	BRD4
	GSM3318686	SRR7643339	CONTROL
	GSM3318687	SRR7643340	CONTROL
GSE112113	GSM3058057	SRR6872008	CONTROL	Zhang T, Wei G, Millard CJ, Fischer R et al. A variant NuRD complex containing PWWP2A/B excludes MBD2/3 to regulate transcription at active genes. Nat Commun 2018 Sep 18;9(1):3798. PMID: 30228260
	GSM3058057	SRR6872009	CONTROL
	GSM3058057	SRR6872010	CONTROL
	GSM3058057	SRR6872011	CONTROL
	GSM3058063	SRR6872032	CONTROL
	GSM3058064	SRR6872033	CONTROL
	GSM3058065	SRR6872034	CONTROL
	GSM3058066	SRR6872035	CONTROL
	GSM3058054	SRR6871996	MTA2
	GSM3058054	SRR6871997	MTA2
	GSM3058054	SRR6871998	MTA2
	GSM3058054	SRR6871999	MTA2
	GSM3290192	SRR7533499	MTA2
	GSM3290192	SRR7533500	MTA2
	GSM3290192	SRR7533501	MTA2
	GSM3290192	SRR7533502	MTA2
GSE11431	GSM288351	SRR001985	CTCF	Chen X, Xu H, Yuan P, Fang F et al. Integration of external signaling pathways with the core transcriptional network in embryonic stem cells. Cell 2008 Jun 13;133(6):1106-17. PMID: 18555785
	GSM288351	SRR001986	CTCF
	GSM288351	SRR001987	CTCF
	GSM288349	SRR001988	E2F1
	GSM288349	SRR001989	E2F1
	GSM288349	SRR001990	E2F1
	GSM288349	SRR001991	E2F1
	GSM288355	SRR001992	ESRRB
	GSM288355	SRR001993	ESRRB
	GSM288355	SRR001994	ESRRB
	GSM288355	SRR001995	ESRRB
	GSM288358	SRR001996	CONTROL
	GSM288358	SRR001997	CONTROL
	GSM288358	SRR001998	CONTROL
	GSM288358	SRR001999	CONTROL
	GSM288354	SRR002000	KLF4
	GSM288354	SRR002001	KLF4
	GSM288354	SRR002002	KLF4
	GSM288354	SRR002003	KLF4
	GSM288345	SRR002004	NANOG
	GSM288345	SRR002005	NANOG
	GSM288345	SRR002006	NANOG
	GSM288345	SRR002007	NANOG
	GSM288345	SRR002008	NANOG
	GSM288345	SRR002009	NANOG
	GSM288345	SRR002010	NANOG
	GSM288345	SRR002011	NANOG
	GSM288346	SRR002012	OCT4
	GSM288346	SRR002013	OCT4
	GSM288346	SRR002014	OCT4
	GSM288346	SRR002015	OCT4
	GSM288347	SRR002023	SOX2
	GSM288347	SRR002024	SOX2
	GSM288347	SRR002025	SOX2
	GSM288347	SRR002026	SOX2
	GSM288360	SRR002027	SUZ12
	GSM288360	SRR002028	SUZ12
	GSM288360	SRR002029	SUZ12
	GSM288360	SRR002030	SUZ12
	GSM288350	SRR002031	TCFCP2I1
	GSM288350	SRR002032	TCFCP2I1
	GSM288350	SRR002033	TCFCP2I1
	GSM288350	SRR002034	TCFCP2I1
	GSM288352	SRR002035	ZFX
	GSM288352	SRR002036	ZFX
	GSM288352	SRR002037	ZFX
	GSM288352	SRR002038	ZFX
	GSM288356	SRR002039	C-MYC
	GSM288356	SRR002040	C-MYC
	GSM288356	SRR002041	C-MYC
	GSM288356	SRR002042	C-MYC
	GSM288357	SRR002043	N-MYC
	GSM288357	SRR002044	N-MYC
	GSM288357	SRR002045	N-MYC
	GSM288357	SRR002046	N-MYC
GSE11724	GSM307154	SRR015157	CONTROL	Marson A, Levine SS, Cole MF, Frampton GM et al. Connecting microRNA genes to the core transcriptional regulatory circuitry of embryonic stem cells. Cell 2008 Aug 8;134(3):521-33. PMID: 18692474
	GSM307155	SRR015158	CONTROL
	GSM307140	SRR015149	NANOG
	GSM307141	SRR015150	NANOG
	GSM307137	SRR015151	OCT4
	GSM307138	SRR050356	SOX2
	GSM307139	SRR050357	SOX2
	GSM307145	SRR015154	SUZ12
	GSM307142	SRR015155	TCF3
	GSM307143	SRR015156	TCF3
GSE125116	GSM356372	SRR8444250	CONTROL	Aragón E, Wang Q, Zou Y, Morgani SM et al. Structural basis for distinct roles of SMAD2 and SMAD3 in FOXH1 pioneer-directed TGF-β signaling. Genes Dev 2019 Nov 1;33(21-22):1506-1524. PMID: 31582430
	GSM356373	SRR8444251	SMAD2
	GSM356374	SRR8444252	SMAD3
GSE13084	GSM327668	SRR015128	EZH2	Ku M, Koche RP, Rheinbay E, Mendenhall EM et al. Genomewide analysis of PRC1 and PRC2 occupancy identifies two classes of bivalent domains. PLoS Genet 2008 Oct;4(10):e1000242. PMID: 18974828
	GSM327668	SRR015129	EZH2
GSE16526	GSM415050	SRR035237	PCL2	Ku M, Koche RP, Rheinbay E, Mendenhall EM et al. Genomewide analysis of PRC1 and PRC2 occupancy identifies two classes of bivalent domains. PLoS Genet 2008 Oct;4(10):e1000242. PMID: 18974828
	GSM415050	SRR035238	PCL2
	GSM415050	SRR035239	PCL2
	GSM415050	SRR035240	PCL2
GSE17642	GSM440256	SRR031683	ESET	Yuan P, Han J, Guo G, Orlov YL et al. Eset partners with Oct4 to restrict extraembryonic trophoblast lineage potential in embryonic stem cells. Genes Dev 2009 Nov 1;23(21):2507-20. PMID: 19884257
	GSM440256	SRR031684	ESET
GSE18371	GSM459283	SRR031679	CONTROL
	GSM459273	SRR031669	SETDB1
	GSM459274	SRR031670	SETDB1
	GSM459275	SRR031671	SETDB1
GSE18588	GSM462292	SRR036790	CONTROL	Blackledge NP, Zhou JC, Tolstorukov MY, Farcas AM et al. CpG islands recruit a histone H3 lysine 36 demethylase. Mol Cell 2010 Apr 23;38(2):179-90. PMID: 20417597
	GSM462291	SRR036789	KDM2A
GSE18699	GSM465677	SRR032104	CONTROL	Goren A, Ozsolak F, Shoresh N, Ku M et al. Chromatin profiling by directly sequencing small quantities of immunoprecipitated DNA. Nat Methods 2010 Jan;7(1):47-9. PMID: 19946276
	GSM465676	SRR032103	CTCF
GSE18776	GSM480164	SRR034192	CONTROL	Peng JC, Valouev A, Swigut T, Zhang J et al. Jarid2/Jumonji coordinates control of PRC2 enzymatic activity and target gene occupancy in pluripotent cells. Cell 2009 Dec 24;139(7):1290-302. PMID: 20064375
	GSM480164	SRR034761	CONTROL
	GSM480164	SRR034762	CONTROL
	GSM480164	SRR034763	CONTROL
	GSM480161	SRR034189	EZH2
	GSM480161	SRR034759	EZH2
	GSM480161	SRR034760	EZH2
	GSM480163	SRR034191	JARID1A
	GSM480163	SRR034764	JARID1A
	GSM465889	SRR034188	JARID2
	GSM465889	SRR034765	JARID2
	GSM480162	SRR034190	SUZ12
GSE19019	GSM470524	SRR034835	CONTROL	Heng JC, Feng B, Han J, Jiang J et al. The nuclear receptor Nr5a2 can replace Oct4 in the reprogramming of murine somatic cells to pluripotent cells. Cell Stem Cell 2010 Feb 5;6(2):167-74. PMID: 20096661
	GSM470524	SRR034836	CONTROL
	GSM470524	SRR034837	CONTROL
	GSM470524	SRR034838	CONTROL
	GSM470523	SRR034832	NR5A2
	GSM470523	SRR034833	NR5A2
	GSM470523	SRR034834	NR5A2
GSE19219	GSM478976	SRR032471	CONTROL	Han J, Yuan P, Yang H, Zhang J et al. Tbx3 improves the germ-line competency of induced pluripotent stem cells. Nature 2010 Feb 25;463(7284):1096-100. PMID: 20139965
	GSM478976	SRR032472	CONTROL
	GSM476146	SRR032469	TBX3
	GSM476146	SRR032470	TBX3
GSE19365	GSM480680	SRR035052	SUZ12	Pasini D, Cloos PA, Walfridsson J, Olsson L et al. JARID2 regulates binding of the Polycomb repressive complex 2 to target genes in ES cells. Nature 2010 Mar 11;464(7286):306-10. PMID: 20075857
GSE19708	GSM491760	SRR034101	JARID2	Li G, Margueron R, Ku M, Chambon P et al. Jarid2 and PRC2, partners in regulating gene expression. Genes Dev 2010 Feb 15;24(4):368-80. PMID: 20123894
GSE20530	GSM515666	SRR036739	CTR9	Rahl PB, Lin CY, Seila AC, Flynn RA et al. c-Myc regulates transcriptional pause release. Cell 2010 Apr 30;141(3):432-45. PMID: 20434984
	GSM515664	SRR036737	NELFA
	GSM515665	SRR036738	SPT5
GSE21614	GSM539552	SRR064932	CONTROL	Mullen AC, Orlando DA, Newman JJ, Lovén J et al. Master transcription factors determine cell-type-specific responses to TGF-β signaling. Cell 2011 Oct 28;147(3):565-76. PMID: 22036565
	GSM539541	SRR064921	SMAD3
GSE22162	GSM551138	SRR057567	ATRX	Law MJ, Lower KM, Voon HP, Hughes JR et al. ATR-X syndrome protein targets tandem repeats and influences allele-specific expression in a size-dependent manner. Cell 2010 Oct 29;143(3):367-78. PMID: 21029860
	GSM551138	SRR057566	ATRX
	GSM639380	SRR080724	CONTROL
GSE22303	GSM555160	SRR057606	TBP
	GSM555162	SRR057607	TBP
GSE22557	GSM560349	SRR058989	NIPBL	Kagey MH, Newman JJ, Bilodeau S, Zhan Y et al. Mediator and cohesin connect gene expression and chromatin architecture. Nature 2010 Sep 23;467(7314):430-5. PMID: 20720539
	GSM560350	SRR058990	NIPBL
GSE22562	GSM560357	SRR058997	CONTROL	Kagey MH, Newman JJ, Bilodeau S, Zhan Y et al. Mediator and cohesin connect gene expression and chromatin architecture. Nature 2010 Sep 23;467(7314):430-5. PMID: 20720539
	GSM560352	SRR058992	CTCF
	GSM560347	SRR058987	MED1
	GSM560348	SRR058988	MED1
	GSM560345	SRR058985	MED12
	GSM560346	SRR058986	MED12
	GSM560341	SRR058981	SMC1
	GSM560342	SRR058982	SMC1
	GSM560343	SRR058983	SMC3
	GSM560344	SRR058984	SMC3
GSE22934	GSM566281	SRR060175	CONTROL	Ang YS, Tsai SY, Lee DF, Monk J et al. Wdr5 mediates self-renewal and reprogramming via the embryonic stem cell core transcriptional network. Cell 2011 Apr 15;145(2):183-97. PMID: 21477851
	GSM566282	SRR060176	CONTROL
	GSM566277	SRR060171	OCT4
	GSM566278	SRR060172	RBBP5
GSE23716	GSM820726	SRR354192	CBX7	Tavares L, Dimitrova E, Oxley D, Webster J et al. RYBP-PRC1 complexes mediate H2A ubiquitylation at polycomb target sites independently of PRC2 and H3K27me3. Cell 2012 Feb 17;148(4):664-78. PMID: 22325148
	GSM585233	SRR072966	CONTROL
	GSM585234	SRR068924	CONTROL
	GSM585235	SRR068925	CONTROL
	GSM585229	SRR068919	RING1B
GSE23943	GSM590132	SRR501769	EZH2	Marks H, Kalkan T, Menafra R, Denissov S et al. The transcriptional and epigenomic foundations of ground state pluripotency. Cell 2012 Apr 27;149(3):590-604. PMID: 22541430
GSE24029	GSM591471	SRR065244	CONTROL	Nitzsche A, Paszkowski-Rogacz M, Matarese F, Janssen-Megens EM et al. RAD21 cooperates with pluripotency transcription factors in the maintenance of embryonic stem cell identity. PLoS One 2011 May 12;6(5):e19470. PMID: 21589869
	GSM591469	SRR065242	RAD21
GSE25409	GSM623991	SRR072986	CONTROL	Ma Z, Swigut T, Valouev A, Rada-Iglesias A et al. Sequence-specific regulator Prdm14 safeguards mouse ESCs from entering extraembryonic endoderm fates. Nat Struct Mol Biol 2011 Feb;18(2):120-7. PMID: 21183938
	GSM623989	SRR072984	PRDM14
GSE25777	GSM634247	SRR074390	CTCF	Nitzsche A, Paszkowski-Rogacz M, Matarese F, Janssen-Megens EM et al. RAD21 cooperates with pluripotency transcription factors in the maintenance of embryonic stem cell identity. PLoS One 2011 May 12;6(5):e19470. PMID: 21589869
GSE25778	GSM634248	SRR074391	CONTROL
GSE26136	GSM651192	SRR167662	DPY30
GSE26361	GSM647224	SRR088303	P53	Li M, He Y, Dubois W, Wu X et al. Distinct regulatory mechanisms and functions for p53-activated and p53-repressed DNA damage response genes in embryonic stem cells. Mol Cell 2012 Apr 13;46(1):30-42. PMID: 22387025 Li M, Gou H, Tripathi BK, Huang J et al. An Apela RNA-Containing Negative Feedback Loop Regulates p53-Mediated Apoptosis in Embryonic Stem Cells. Cell Stem Cell 2015 Jun 4;16(6):669-83…
	GSM647226	SRR088305	P53S18P
GSE26680	GSM656526	SRR094943	ATF7IP	Not found
	GSM656525	SRR094942	REST
	GSM656523	SRR094941	RING1B
GSE26832	GSM659803	SRR096334	CONTROL	Wu H, D'Alessio AC, Ito S, Xia K et al. Dual functions of Tet1 in transcriptional regulation in mouse embryonic stem cells. Nature 2011 May 19;473(7347):389-93. PMID: 21451524 Wu H, D'Alessio AC, Ito S, Wang Z et al. Genome-wide analysis of 5-hydroxymethylcytosine distribution reveals its dual function in transcriptional regulation in mouse embryonic stem cells. Genes Dev 2011 Apr 1;25(7):679-84.…
	GSM659804	SRR096335	CONTROL
	GSM659799	SRR096330	TET1
	GSM659800	SRR096331	TET1
GSE27148	GSM671094	SRR099005	REST	Arnold P, Schöler A, Pachkov M, Balwierz PJ et al. Modeling of epigenome dynamics identifies transcription factors that mediate Polycomb targeting. Genome Res 2013 Jan;23(1):60-73. PMID: 22964890
	GSM671095	SRR099006	REST
GSE27841	GSM687289	SRR122477	CONTROL	Whyte WA, Bilodeau S, Orlando DA, Hoke HA et al. Enhancer decommissioning by LSD1 during embryonic stem cell differentiation. Nature 2012 Feb 1;482(7384):221-5. PMID: 22297846
	GSM687278	SRR122466	HDAC1
	GSM687279	SRR122467	HDAC1
	GSM687280	SRR122468	HDAC1
	GSM687277	SRR122465	HDAC1
	GSM687281	SRR122469	KDM1A
	GSM687282	SRR122470	KDM1A
	GSM687284	SRR122472	MI-2B
	GSM687285	SRR122473	REST
GSE28247	GSM699168	SRR172859	CONTROL	Handoko L, Xu H, Li G, Ngan CY et al. CTCF-mediated functional chromatin interactome in pluripotent cells. Nat Genet 2011 Jun 19;43(7):630-8. PMID: 21685913
	GSM699168	SRR172860	CONTROL
	GSM699165	SRR172853	CTCF
	GSM699165	SRR172854	CTCF
GSE28325	GSM700559	SRR171282	CONTROL	Hunkapiller J, Shen Y, Diaz A, Cagney G et al. Polycomb-like 3 promotes polycomb repressive complex 2 binding to CpG islands and embryonic stem cell self-renewal. PLoS Genet 2012;8(3):e1002576. PMID: 22438827
	GSM700554	SRR171277	SUZ12
GSE28532	GSM706673	SRR185880	CONTROL	Xu Y, Wu F, Tan L, Kong L et al. Genome-wide regulation of 5hmC, 5mC, and gene expression by Tet1 hydroxylase in mouse embryonic stem cells. Mol Cell 2011 May 20;42(4):451-64. PMID: 21514197
	GSM706672	SRR185879	TET1
GSE29218	GSM723020	SRR207088	CONTROL	Shen Y, Yue F, McCleary DF, Ye Z et al. A map of the cis-regulatory sequences in the mouse genome. Nature 2012 Aug 2;488(7409):116-20. PMID: 22763441
	GSM723020	SRR207089	CONTROL
	GSM723015	SRR207081	CTCF
GSE30203	GSM747545	SRR299040	CONTROL	Stadler MB, Murr R, Burger L, Ivanek R et al. DNA-binding factors shape the mouse methylome at distal regulatory regions. Nature 2011 Dec 14;480(7378):490-5. PMID: 22170606
	GSM747546	SRR299041	CONTROL
	GSM747534	SRR299029	CTCF
	GSM747535	SRR299030	CTCF
	GSM747536	SRR299031	CTCF
GSE30267	GSM749810	SRR299132	AFF4	Lin C, Garrett AS, De Kumar B, Smith ER et al. Dynamic transcriptional events in embryonic stem cells mediated by the super elongation complex (SEC). Genes Dev 2011 Jul 15;25(14):1486-98. PMID: 21764852
	GSM828132	SRR361466	CDK9
	GSM749811	SRR299133	CONTROL
	GSM749824	SRR299146	CONTROL
	GSM749809	SRR299131	ELL2
GSE30919	GSM766454	SRR316194	SMC1A	Dowen JM, Bilodeau S, Orlando DA, Hübner MR et al. Multiple structural maintenance of chromosome complexes at transcriptional regulatory elements. Stem Cell Reports 2013;1(5):371-8. PMID: 24286025
GSE31270	GSM774941	SRR331056	CONTROL	Liu Z, Scannell DR, Eisen MB, Tjian R. Control of embryonic stem cell lineage commitment by core promoter factor, TAF3. Cell 2011 Sep 2;146(5):720-31. PMID: 21884934
	GSM774941	SRR331057	CONTROL
	GSM774945	SRR331064	CONTROL
	GSM774945	SRR331065	CONTROL
	GSM774940	SRR331054	TAF3
	GSM774940	SRR331055	TAF3
	GSM774944	SRR331062	TBP
	GSM774944	SRR331063	TBP
GSE31690	GSM786608	SRR341119	MBD3	Yildirim O, Li R, Hung JH, Chen PB et al. Mbd3/NURD complex regulates expression of 5-hydroxymethylcytosine marked genes in embryonic stem cells. Cell 2011 Dec 23;147(7):1498-510. PMID: 22196727
	GSM786609	SRR341120	MBD3
GSE31785	GSM788496	SRR341113	YY1	Vella P, Barozzi I, Cuomo A, Bonaldi T et al. Yin Yang 1 extends the Myc-related transcription factors network in embryonic stem cells. Nucleic Acids Res 2012 Apr;40(8):3403-18. PMID: 22210892
GSE31966	GSM791782	SRR342055	KDM5B	Schmitz SU, Albert M, Malatesta M, Morey L et al. Jarid1b targets genes regulating development and is involved in neural differentiation. EMBO J 2011 Nov 16;30(22):4586-600. PMID: 22020125
	GSM791783	SRR342056	KDM5B
GSE33346	GSM824840	SRR361424	CAPD3	Dowen JM, Bilodeau S, Orlando DA, Hübner MR et al. Multiple structural maintenance of chromosome complexes at transcriptional regulatory elements. Stem Cell Reports 2013;1(5):371-8. PMID: 24286025
	GSM824836	SRR361420	CAPH2
	GSM824838	SRR361422	CONTROL
	GSM824839	SRR361423	CONTROL
	GSM824844	SRR361428	CONTROL
	GSM824841	SRR361425	NCAPD3
	GSM824847	SRR361431	RAD21
	GSM824848	SRR361432	RAD21
GSE34094	GSM841708	SRR387389	CTCF	Sleutels F, Soochit W, Bartkuhn M, Heath H et al. The male germ cell gene regulator CTCFL is functionally different from CTCF and binds CTCF-like consensus sites in a nucleosome composition-dependent manner. Epigenetics Chromatin 2012 Jun 18;5(1):8. PMID: 22709888
GSE34518	GSM850474	SRR391047	RING1B	Brookes E, de Santiago I, Hebenstreit D, Morris KJ et al. Polycomb associates genome-wide with a specific RNA polymerase II variant, and regulates metabolic genes in ESCs. Cell Stem Cell 2012 Feb 3;10(2):157-70. PMID: 22305566
	GSM850474	SRR391048	RING1B
	GSM850474	SRR391049	RING1B
GSE34975	GSM859660	SRR397778	KDM5C	Outchkourov NS, Muiño JM, Kaufmann K, van Ijcken WF et al. Balancing of histone H3K4 methylation states by the Kdm5c/SMCX histone demethylase modulates promoter and enhancer function. Cell Rep 2013 Apr 25;3(4):1071-9. PMID: 23545502
GSE36027	GSM918748	SRR489719	CTCF	Shen Y, Yue F, McCleary DF, Ye Z et al. A map of the cis-regulatory sequences in the mouse genome. Nature 2012 Aug 2;488(7409):116-20. PMID: 22763441
	GSM918748	SRR489720	CTCF
GSE36030	GSM1003811	SRR574804	CONTROL	Not found
	GSM1003811	SRR574805	CONTROL
	GSM1003799	SRR574780	HCFC1
	GSM1003799	SRR574781	HCFC1
GSE36561	GSM937540	SRR500928	BRD4	Not found
	GSM896916	SRR445740	STAG1
	GSM937541	SRR500929	STAG1
	GSM896915	SRR445739	STAG2
	GSM937542	SRR500930	STAG2
GSE37262	GSM915093	SRR486153	CONTROL	Percharde M, Lavial F, Ng JH, Kumar V et al. Ncoa3 functions as an essential Esrrb coactivator to sustain embryonic stem cell self-renewal and reprogramming. Genes Dev 2012 Oct 15;26(20):2286-98. PMID: 23019124
	GSM915092	SRR486152	NCOA3
GSE37268	GSM915229	SRR486253	CONTROL	Li X, Li L, Pandey R, Byun JS et al. The histone acetyltransferase MOF is a key regulator of the embryonic stem cell core transcriptional network. Cell Stem Cell 2012 Aug 3;11(2):163-78. PMID: 22862943 Wu L, Li L, Zhou B, Qin Z et al. H2B ubiquitylation promotes RNA Pol II processivity via PAF1 and pTEFb. Mol Cell 2014 Jun 19;54(6):920-931. PMID: 24837678
	GSM915227	SRR486251	MOF
	GSM915228	SRR486252	MOF
GSE39154	GSM957085	SRR518938	CONTROL	Vella P, Scelfo A, Jammula S, Chiacchiera F et al. Tet proteins connect the O-linked N-acetylglucosamine transferase Ogt to chromatin in embryonic stem cells. Mol Cell 2013 Feb 21;49(4):645-56. PMID: 23352454
	GSM957084	SRR518937	OGT
GSE39513	GSM970523	SRR530856	CONTROL	Vella P, Scelfo A, Jammula S, Chiacchiera F et al. Tet proteins connect the O-linked N-acetylglucosamine transferase Ogt to chromatin in embryonic stem cells. Mol Cell 2013 Feb 21;49(4):645-56. PMID: 23352454
	GSM970524	SRR530857	UTF1
GSE40860	GSM1003595	SRR568019	CONTROL	Farcas AM, Blackledge NP, Sudbery I, Long HK et al. KDM2B links the Polycomb Repressive Complex 1 (PRC1) to recognition of CpG islands. Elife 2012 Dec 18;1:e00205. PMID: 23256043
	GSM1003593	SRR568017	KDM2A
GSE41589	GSM1019774	SRR592589	CONTROL	Ballaré C, Lange M, Lapinaite A, Martin GM et al. Phf19 links methylated Lys36 of histone H3 to regulation of Polycomb activity. Nat Struct Mol Biol 2012 Dec;19(12):1257-65. PMID: 23104054
	GSM1019771	SRR592586	SUZ12
GSE41720	GSM1023125	SRR597872	OGT	Chen Q, Chen Y, Bian C, Fujiki R et al. TET2 promotes histone O-GlcNAcylation during gene transcription. Nature 2013 Jan 24;493(7433):561-4. PMID: 23222540
GSE42152	GSM1033642	SRR612145	CONTROL	Banaszynski LA, Wen D, Dewell S, Whitcomb SJ et al. Hira-dependent histone H3.3 deposition facilitates PRC2 recruitment at developmental loci in ES cells. Cell 2013 Sep 26;155(1):107-20. PMID: 24074864
	GSM1207789	SRR952335	HIRA
GSE42466	GSM1041373	SRR620205	CBX7	Morey L, Aloia L, Cozzuto L, Benitah SA et al. RYBP and Cbx7 define specific biological functions of polycomb complexes in mouse embryonic stem cells. Cell Rep 2013 Jan 31;3(1):60-9. PMID: 23273917
	GSM1041376	SRR620208	CONTROL
	GSM1041377	SRR620209	CONTROL
	GSM1041375	SRR620207	RYBP
GSE43565	GSM1065521	SRR650394	CONTROL	Zhang X, Peterson KA, Liu XS, McMahon AP et al. Gene regulatory networks mediating canonical Wnt signal-directed control of pluripotency and differentiation in embryo stem cells. Stem Cells 2013 Dec;31(12):2667-79. PMID: 23505158
	GSM1065521	SRR650395	CONTROL
	GSM1065519	SRR650390	CTNNB1
	GSM1065519	SRR650391	CTNNB1
GSE44242	GSM1081158	SRR707086	CBX3	Sridharan R, Gonzales-Cope M, Chronis C, Bonora G et al. Proteomic and genomic approaches reveal critical functions of H3K9 methylation and heterochromatin protein-1γ in reprogramming to pluripotency. Nat Cell Biol 2013 Jul;15(7):872-82. PMID: 23748610
	GSM1081160	SRR707088	CONTROL
GSE44286	GSM1082346	SRR713346	CDK8	Whyte WA, Orlando DA, Hnisz D, Abraham BJ et al. Master transcription factors and mediator establish super-enhancers at key cell identity genes. Cell 2013 Apr 11;153(2):307-19. PMID: 23582322
	GSM1082347	SRR713347	CDK9
	GSM1082343	SRR713343	CONTROL
GSE45338	GSM2425393	SRR5099931	SMARCAD1	Xiao S, Lu J, Sridhar B, Cao X et al. SMARCAD1 Contributes to the Regulation of Naive Pluripotency by Interacting with Histone Citrullination. Cell Rep 2017 Mar 28;18(13):3117-3128. PMID: 28355564
GSE45625	GSM1110844	SRR799670	CONTROL	Dykhuizen EC, Hargreaves DC, Miller EL, Cui K et al. BAF complexes facilitate decatenation of DNA by topoisomerase IIα. Nature 2013 May 30;497(7451):624-7. PMID: 23698369
	GSM1110842	SRR799668	TOP2A
GSE46536	GSM1215221	SRR976066	CONTROL	Mozzetta C, Pontis J, Fritsch L, Robin P et al. The histone H3 lysine 9 methyltransferases G9a and GLP regulate polycomb repressive complex 2-mediated gene silencing. Mol Cell 2014 Jan 23;53(2):277-89. PMID: 24389103
	GSM1215224	SRR976069	CONTROL
	GSM1215219	SRR976061	EHMT2
	GSM1215219	SRR976062	EHMT2
	GSM1215219	SRR976063	EHMT2
	GSM1215219	SRR976064	EHMT2
GSE47082	GSM1144549	SRR858757	CONTROL	Org T, Duan D, Ferrari R, Montel-Hagen A et al. Scl binds to primed enhancers in mesoderm to regulate hematopoietic and cardiac fate divergence. EMBO J 2015 Mar 12;34(6):759-77. PMID: 25564442
	GSM1359837	SRR1209635	KDM1A
GSE48122	GSM1169002	SRR908371	CONTROL	Dietrich N, Lerdrup M, Landt E, Agrawal-Singh S et al. REST-mediated recruitment of polycomb repressor complexes in mammalian cells. PLoS Genet 2012;8(3):e1002494. PMID: 22396653
	GSM1169006	SRR908373	JARID2
GSE48175	GSM1171651	SRR915920	CONTROL	Krepelova A, Neri F, Maldotti M, Rapelli S et al. Myc and max genome-wide binding sites analysis links the Myc regulatory network with the polycomb and the core pluripotency networks in mouse embryonic stem cells. PLoS One 2014;9(2):e88933. PMID: 24586446
	GSM1171650	SRR915919	MAX
GSE48666	GSM1183119	SRR2141933	CONTROL	Beck S, Lee BK, Rhee C, Song J et al. CpG island-mediated global gene regulatory modes in mouse embryonic stem cells. Nat Commun 2014 Nov 18;5:5490. PMID: 25405324
	GSM1183112	SRR929187	DMAP1
	GSM1183112	SRR929188	DMAP1
	GSM1183113	SRR929189	E2F4
	GSM1183113	SRR929190	E2F4
	GSM1183115	SRR929193	MAX
	GSM1183115	SRR929194	MAX
	GSM1183118	SRR929199	NANOG
	GSM1183118	SRR929200	NANOG
	GSM1183117	SRR2141931	NR0B1
	GSM1183114	SRR929191	TIP60
	GSM1183114	SRR929192	TIP60
GSE49848	GSM1208219	SRR952212	CONTROL	Aksoy I, Giudice V, Delahaye E, Wianny F et al. Klf4 and Klf5 differentially inhibit mesoderm and endoderm differentiation in embryonic stem cells. Nat Commun 2014 Apr 28;5:3719. PMID: 24770696
	GSM1208217	SRR952210	KLF4
	GSM1208218	SRR952211	KLF5
GSE51522	GSM1246866	SRR1014797	CREBBP	Hnisz D, Abraham BJ, Lee TI, Lau A et al. Super-enhancers in the control of cell identity and disease. Cell 2013 Nov 7;155(4):934-47. PMID: 24119843
	GSM1246868	SRR1014799	THAP11
GSE51746	GSM1251941	SRR1258415	CONTROL	Chelmicki T, Dündar F, Turley MJ, Khanam T et al. MOF-associated complexes ensure stem cell identity and Xist repression. Elife 2014 May 19;3:e02024. PMID: 24842875
	GSM1251942	SRR1258416	CONTROL
	GSM1251943	SRR1258417	MCRS1
	GSM1251944	SRR1258418	MCRS1
GSE52071	GSM1258240	SRR1270145	ASH2L	Denissov S, Hofemeister H, Marks H, Kranz A et al. Mll2 is required for H3K4 trimethylation on bivalent promoters in embryonic stem cells, whereas Mll1 is redundant. Development 2014 Feb;141(3):526-37. PMID: 24423662
	GSM1258239	SRR1270144	CXXC1
GSE52899	GSM1277674	SRR1041593	CONTROL	Yang W, Lee YH, Jones AE, Woolnough JL et al. The histone H2A deubiquitinase Usp16 regulates embryonic stem cell gene expression and lineage commitment. Nat Commun 2014 May 2;5:3818. PMID: 24784029
	GSM1277672	SRR1041591	USP16
GSE53087	GSM1282126	SRR1044605	KDM5B	Kidder BL, Hu G, Zhao K. KDM5B focuses H3K4 methylation near promoters and enhancers during embryonic stem cell self-renewal and differentiation. Genome Biol 2014 Feb 4;15(2):R32. PMID: 24495580
GSE53233	GSM1288312	SRR1047788	CONTROL	Yoon SJ, Foley JW, Baker JC. HEB associates with PRC2 and SMAD2/3 to regulate developmental fates. Nat Commun 2015 Mar 16;6:6546. PMID: 25775035
	GSM1288310	SRR1047786	SMAD2
GSE53797	GSM1300939	SRR1068232	MSL1	Ravens S, Fournier M, Ye T, Stierle M et al. Mof-associated complexes have overlapping and unique roles in regulating pluripotency in embryonic stem cells and during differentiation. Elife 2014 Jun 4;3. PMID: 24898753
GSE55404	GSM1335485	SRR1178494	CONTROL	Lee BK, Shen W, Lee J, Rhee C et al. Tgif1 Counterbalances the Activity of Core Pluripotency Factors in Mouse Embryonic Stem Cells. Cell Rep 2015 Oct 6;13(1):52-60. PMID: 26411691
	GSM1335485	SRR1178495	CONTROL
	GSM1335485	SRR1178496	CONTROL
	GSM1335481	SRR1178488	TGIF1
GSE55630	GSM1340603	SRR1184170	CONTROL	Sanulli S, Justin N, Teissandier A, Ancelin K et al. Jarid2 Methylation via the PRC2 Complex Regulates H3K27me3 Deposition during Cell Differentiation. Mol Cell 2015 Mar 5;57(5):769-783. PMID: 25620564
	GSM1340604	SRR1184171	JARID2
GSE55657	GSM1341310	SRR1184632	CONTROL	Neri F, Incarnato D, Krepelova A, Rapelli S et al. Single-Base Resolution Analysis of 5-Formyl and 5-Carboxyl Cytosine Reveals Promoter DNA Methylation Dynamics. Cell Rep 2015 Feb 10;10(5):674-683. PMID: 25660018
	GSM1341311	SRR1184633	TDG
GSE56839	GSM1370110	SRR1239518	CONTROL	Oldfield AJ, Yang P, Conway AE, Cinghu S et al. Histone-fold domain protein NF-Y promotes chromatin accessibility for cell type-specific master transcription factors. Mol Cell 2014 Sep 4;55(5):708-22. PMID: 25132174
	GSM1370111	SRR1239519	NFYA
	GSM1370112	SRR1239520	NFYB
	GSM1370113	SRR1239521	NFYC
GSE56981	GSM1372574	SRR1258446	ATRX	Sarma K, Cifuentes-Rojas C, Ergun A, Del Rosario A et al. ATRX directs binding of PRC2 to Xist RNA and Polycomb targets. Cell 2014 Nov 6;159(4):869-83. PMID: 25417162
	GSM1372576	SRR1258448	ATRX
	GSM1372575	SRR1258447	CONTROL
	GSM1372577	SRR1258449	CONTROL
GSE57221	GSM1377429	SRR1267896	CONTROL	Lacroix M, Rodier G, Kirsh O, Houles T et al. E4F1 controls a transcriptional program essential for pyruvate dehydrogenase activity. Proc Natl Acad Sci U S A 2016 Sep 27;113(39):10998-1003. PMID: 27621446 Goguet-Rubio P, Seyran B, Gayte L, Bernex F et al. E4F1-mediated control of pyruvate dehydrogenase activity is essential for skin homeostasis. Proc Natl Acad Sci U S A 2016 Sep 27;113(39):11004-…
	GSM1377428	SRR1267895	E4F1
GSE57700	GSM2065695	SRR3176688	CONTROL	Xiong J, Zhang Z, Chen J, Huang H et al. Cooperative Action between SALL4A and TET Proteins in Stepwise Oxidation of 5-Methylcytosine. Mol Cell 2016 Dec 1;64(5):913-925. PMID: 27840027
	GSM2065694	SRR3176687	SALL4
GSE59188	GSM1429923	SRR1508942	CONTROL	Elsässer SJ, Noh KM, Diaz N, Allis CD et al. Histone H3.3 is required for endogenous retroviral element silencing in embryonic stem cells. Nature 2015 Jun 11;522(7555):240-244. PMID: 25938714
	GSM1429920	SRR1508939	DAXX
GSE59378	GSM1436069	SRR1514339	CONTROL	Letourneau A, Cobellis G, Fort A, Santoni F et al. HSA21 Single-Minded 2 (Sim2) Binding Sites Co-Localize with Super-Enhancers and Pioneer Transcription Factors in Pluripotent Mouse ES Cells. PLoS One 2015;10(5):e0126475. PMID: 25955728
	GSM1436068	SRR1514338	NANOG
GSE60027	GSM1463943	SRR1534840	CDK8	Not found
GSE61188	GSM1499114	SRR1569078	CONTROL	Luo Z, Gao X, Lin C, Smith ER et al. Zic2 is an enhancer-binding factor required for embryonic stem cell specification. Mol Cell 2015 Feb 19;57(4):685-694. PMID: 25699711
	GSM1571964	SRR1734332	ZIC3
GSE62864	GSM1534644	SRR1635428	HNRNPL	Li M, Gou H, Tripathi BK, Huang J et al. An Apela RNA-Containing Negative Feedback Loop Regulates p53-Mediated Apoptosis in Embryonic Stem Cells. Cell Stem Cell 2015 Jun 4;16(6):669-83. PMID: 25936916
GSE63282	GSM1545026	SRR1652477	CONTROL	Laurent A, Calabrese M, Warnatz HJ, Yaspo ML et al. ChIP-Seq and RNA-Seq analyses identify components of the Wnt and Fgf signaling pathways as Prep1 target genes in mouse embryonic stem cells. PLoS One 2015;10(4):e0122518. PMID: 25875616
	GSM1545025	SRR1652476	PKNOX1
GSE63974	GSM2299074	SRR4101215	CDC73	Strikoudis A, Lazaris C, Trimarchi T, Galvao Neto AL et al. Regulation of transcriptional elongation in pluripotency and cell differentiation by the PHD-finger protein Phf5a. Nat Cell Biol 2016 Nov;18(11):1127-1138. PMID: 27749823
	GSM2299075	SRR4101216	CDC73
	GSM1894005	SRR2518162	CONTROL
	GSM1893978	SRR2518182	CONTROL
	GSM2299072	SRR4101213	LEO1
	GSM2299073	SRR4101214	LEO1
	GSM1894007	SRR2518144	PAF1
	GSM1894008	SRR2518145	PAF1
	GSM1894009	SRR2518146	PAF1
GSE64008	GSM1562337	SRR1699463	CBX7	Jacinto FV, Benner C, Hetzer MW. The nucleoporin Nup153 regulates embryonic stem cell pluripotency through gene silencing. Genes Dev 2015 Jun 15;29(12):1224-38. PMID: 26080816
	GSM1562338	SRR1699464	CONTROL
	GSM1562333	SRR1699459	RNF2
GSE64252	GSM2143305	SRR3476663	KDM4A	Pedersen MT, Kooistra SM, Radzisheuskaya A, Laugesen A et al. Continual removal of H3K9 promoter methylation by Jmjd2 demethylases is vital for ESC self-renewal and early development. EMBO J 2016 Jul 15;35(14):1550-64. PMID: 27266524
GSE65695	GSM1603268	SRR1792511	FGFR1	Terranova C, Narla ST, Lee YW, Bard J et al. Global Developmental Gene Programing Involves a Nuclear Form of Fibroblast Growth Factor Receptor-1 (FGFR1). PLoS One 2015;10(4):e0123380. PMID: 25923916
GSE67867	GSM1657383	SRR1973547	CONTROL	Domcke S, Bardet AF, Adrian Ginno P, Hartl D et al. Competition between DNA methylation and transcription factors determines binding of NRF1. Nature 2015 Dec 24;528(7583):575-9. PMID: 26675734
	GSM1657381	SRR1973545	NRF1
	GSM1657382	SRR1973546	NRF1
GSE67944	GSM1659404	SRR1976187	BRD2	Surface LE, Fields PA, Subramanian V, Behmer R et al. H2A.Z.1 Monoubiquitylation Antagonizes BRD2 to Maintain Poised Chromatin in ESCs. Cell Rep 2016 Feb 9;14(5):1142-1155. PMID: 26804911
	GSM1659405	SRR1976188	BRD2
GSE69140	GSM1865691	SRR2225937	BRD4	Flynn RA, Do BT, Rubin AJ, Calo E et al. 7SK-BAF axis controls pervasive transcription at enhancers. Nat Struct Mol Biol 2016 Mar;23(3):231-8. PMID: 26878240
	GSM1865692	SRR2225938	BRD4
	GSM1693792	SRR2037002	CONTROL
	GSM1693793	SRR2037003	DDX21
	GSM1693794	SRR2037004	HEXIM1
GSE69671	GSM1706504	SRR2056996	KAT5	Ravens S, Yu C, Ye T, Stierle M et al. Tip60 complex binds to active Pol II promoters and a subset of enhancers and co-regulates the c-Myc network in mouse embryonic stem cells. Epigenetics Chromatin 2015;8:45. PMID: 26550034
GSE70661	GSM1816096	SRR2094213	GTF2B	Langer D, Martianov I, Alpern D, Rhinn M et al. Essential role of the TFIID subunit TAF4 in murine embryogenesis and embryonic stem cell differentiation. Nat Commun 2016 Mar 30;7:11063. PMID: 27026076
GSE70799	GSM1819198	SRR2098963	CONTROL	Yang BX, El Farran CA, Guo HC, Yu T et al. Systematic identification of factors for provirus silencing in embryonic stem cells. Cell 2015 Sep 24;163(1):230-45. PMID: 26365490
	GSM1819199	SRR2098964	TRIM28
GSE71675	GSM1842787	SRR2142024	CBFA2T2	Tu S, Narendra V, Yamaji M, Vidal SE et al. Co-repressor CBFA2T2 regulates pluripotency and germline development. Nature 2016 Jun 16;534(7607):387-90. PMID: 27281218
	GSM1842788	SRR2142025	CONTROL
	GSM1842790	SRR2142027	PRDM14
GSE73692	GSM1900988	SRR2550334	CONTROL	Mzoughi S, Zhang J, Hequet D, Teo SX et al. PRDM15 safeguards naive pluripotency by transcriptionally regulating WNT and MAPK-ERK signaling. Nat Genet 2017 Sep;49(9):1354-1363. PMID: 28740264
	GSM1900988	SRR2550335	CONTROL
	GSM1900988	SRR2550336	CONTROL
	GSM1900988	SRR2550337	CONTROL
	GSM1900990	SRR2550342	PRDM15
	GSM1900990	SRR2550343	PRDM15
	GSM1900990	SRR2550344	PRDM15
	GSM1900990	SRR2550345	PRDM15
GSE74112	GSM1910648	SRR2673311	CONTROL	Liu Z, Kraus WL. Catalytic-Independent Functions of PARP-1 Determine Sox2 Pioneer Activity at Intractable Genomic Loci. Mol Cell 2017 Feb 16;65(4):589-603.e9. PMID: 28212747
	GSM1910650	SRR2673313	CONTROL
	GSM1910638	SRR2673301	PARP1
	GSM1910639	SRR2673302	PARP1
	GSM1910640	SRR2673303	SOX2
	GSM1910642	SRR2673305	SOX2
GSE74330	GSM1917300	SRR2778065	CONTROL	Kloet SL, Makowski MM, Baymaz HI, van Voorthuijsen L et al. The dynamic interactome and genomic targets of Polycomb complexes during stem-cell differentiation. Nat Struct Mol Biol 2016 Jul;23(7):682-690. PMID: 27294783
	GSM1917299	SRR2778064	PCGF2
GSE76536	GSM2027604	SRR3085650	CONTROL	Liefke R, Karwacki-Neisius V, Shi Y. EPOP Interacts with Elongin BC and USP7 to Modulate the Chromatin Landscape. Mol Cell 2016 Nov 17;64(4):659-672. PMID: 27863226
	GSM2281271	SRR4034951	USP7
GSE77779	GSM2059182	SRR3160211	DNMT1	Sharif J, Endo TA, Nakayama M, Karimi MM et al. Activation of Endogenous Retroviruses in Dnmt1(-/-) ESCs Involves Disruption of SETDB1-Mediated Repression by NP95 Binding to Hemimethylated DNA. Cell Stem Cell 2016 Jul 7;19(1):81-94. PMID: 27151458
GSE78258	GSM2070527	SRR3185986	CONTROL	Li S, Yen L, Pastor WA, Johnston JB et al. Mouse MORC3 is a GHKL ATPase that localizes to H3K4me3 marked chromatin. Proc Natl Acad Sci U S A 2016 Aug 30;113(35):E5108-16. PMID: 27528681
	GSM2070528	SRR3185987	CONTROL
	GSM2070529	SRR3185988	CONTROL
	GSM2070524	SRR3185983	MORC3
	GSM2070525	SRR3185984	MORC3
	GSM2070526	SRR3185985	MORC3
GSE80034	GSM2111454	SRR3350631	NCAPH2	Yuen KC, Slaughter BD, Gerton JL. Condensin II is anchored by TFIIIC and H3K4me3 in the mammalian genome and supports the expression of active dense gene clusters. Sci Adv 2017 Jun;3(6):e1700191. PMID: 28691095
GSE80049	GSM2808659	SRR6159362	CONTROL	Local A, Huang H, Albuquerque CP, Singh N et al. Identification of H3K4me1-associated proteins at mammalian enhancers. Nat Genet 2018 Jan;50(1):73-82. PMID: 29255264
	GSM2808649	SRR6159352	CONTROL
	GSM2808668	SRR6159371	DPF2
	GSM2808654	SRR6159357	DPF2
	GSM2111707	SRR3494910	PHF5A
	GSM2111708	SRR3494911	PHF5A
	GSM2111716	SRR3494919	RUVBL1
	GSM2111717	SRR3494920	RUVBL1
	GSM2111718	SRR3494921	RUVBL2
	GSM2111719	SRR3494922	RUVBL2
	GSM2111720	SRR3494923	SAP18
	GSM2111721	SRR3494924	SAP18
	GSM2111725	SRR3494928	SMARCA5
	GSM2111726	SRR3494929	SMARCA5
	GSM2111731	SRR3494934	SSRP1
GSE81081	GSM2142336	SRR3473789	SIN3A	Streubel G, Fitzpatrick DJ, Oliviero G, Scelfo A et al. Fam60a defines a variant Sin3a-Hdac complex in embryonic stem cells required for self-renewal. EMBO J 2017 Aug 1;36(15):2216-2232. PMID: 28554894
GSE84905	GSM2253808	SRR3955926	CONTROL	Yang CS, Chang KY, Dang J, Rana TM. Polycomb Group Protein Pcgf6 Acts as a Master Regulator to Maintain Embryonic Stem Cell Identity. Sci Rep 2016 Jun 1;6:26899. PMID: 27247273
	GSM2253809	SRR3955927	PCGF6
	GSM2253810	SRR3955928	PCGF6
	GSM2253811	SRR3955929	PCGF6
	GSM2253812	SRR3955930	PCGF6
GSE85062	GSM2257275	SRR3992441	CONTROL	Not found
	GSM2257275	SRR3992442	CONTROL
	GSM2257275	SRR3992443	CONTROL
	GSM2257275	SRR3992444	CONTROL
	GSM2257272	SRR3992429	POU2F1
	GSM2257272	SRR3992430	POU2F1
	GSM2257272	SRR3992431	POU2F1
	GSM2257272	SRR3992432	POU2F1
GSE87037	GSM2319260	SRR4252665	BRD4	Aldiri I, Xu B, Wang L, Chen X et al. The Dynamic Epigenetic Landscape of the Retina During Development, Reprogramming, and Tumorigenesis. Neuron 2017 May 3;94(3):550-568.e10. PMID: 28472656
	GSM2319553	SRR4252959	CONTROL
GSE87820	GSM2521508	SRR5312162	SS18	King HW, Klose RJ. The pioneer factor OCT4 requires the chromatin remodeller BRG1 to support gene regulatory element function in mouse embryonic stem cells. Elife 2017 Mar 13;6. PMID: 28287392
	GSM2521509	SRR5312163	SS18
	GSM2521510	SRR5312164	SS18
GSE88823	GSM2349433	SRR4427525	CBX7	Rosenberg M, Blum R, Kesner B, Maier VK et al. Denaturing CLIP, dCLIP, Pipeline Identifies Discrete RNA Footprints on Chromatin-Associated Proteins and Reveals that CBX7 Targets 3' UTRs to Regulate mRNA Expression. Cell Syst 2017 Oct 25;5(4):368-385.e15. PMID: 29073373
	GSM2349434	SRR4427526	CONTROL
GSE89209	GSM2360933	SRR4453262	CONTROL	Cruz-Molina S, Respuela P, Tebartz C, Kolovos P et al. PRC2 Facilitates the Regulatory Topology Required for Poised Enhancer Function during Pluripotent Stem Cell Differentiation. Cell Stem Cell 2017 May 4;20(5):689-705.e9. PMID: 28285903
	GSM2360934	SRR4453263	EP300
GSE89810	GSM2389985	SRR5017448	CONTROL	Suzuki HI, Young RA, Sharp PA. Super-Enhancer-Mediated RNA Processing Revealed by Integrative MicroRNA Network Analysis. Cell 2017 Mar 9;168(6):1000-1014.e15. PMID: 28283057
	GSM2389981	SRR5017444	DGCR8
GSE89810	GSM2389982	SRR5017445	DROSHA	Suzuki HI, Young RA, Sharp PA. Super-Enhancer-Mediated RNA Processing Revealed by Integrative MicroRNA Network Analysis. Cell 2017 Mar 9;168(6):1000-1014.e15. PMID: 28283057
GSE89929	GSM2393581	SRR5027787	CBX7	Kundu S, Ji F, Sunwoo H, Jain G et al. Polycomb Repressive Complex 1 Generates Discrete Compacted Domains that Change during Differentiation. Mol Cell 2017 Feb 2;65(3):432-446.e5. PMID: 28157505 Lau MS, Schwartz MG, Kundu S, Savol AJ et al. Mutation of a nucleosome compaction region disrupts Polycomb-mediated axial patterning. Science 2017 Mar 10;355(6329):1081-1084. PMID: 28280206
	GSM2393592	SRR5027798	CONTROL
	GSM2393593	SRR5027799	CONTROL
	GSM2393580	SRR5027786	PHC1
GSE90893	GSM2417127	SRR5077675	CONTROL	Chronis C, Fiziev P, Papp B, Butz S et al. Cooperative Binding of Transcription Factors Orchestrates Reprogramming. Cell 2017 Jan 26;168(3):442-459.e20. PMID: 28111071
	GSM2417144	SRR5077692	KLF4
GSE92257	GSM2424702	SRR5098239	CONTROL	Knuckles P, Carl SH, Musheev M, Niehrs C et al. RNA fate determination through cotranscriptional adenosine methylation and microprocessor binding. Nat Struct Mol Biol 2017 Jul;24(7):561-569. PMID: 28581511
	GSM2424700	SRR5098237	METTL3
	GSM2424701	SRR5098238	METTL3
GSE95374	GSM2789820	SRR6056851	CONTROL	Liu N, Lee CH, Swigut T, Grow E et al. Selective silencing of euchromatic L1s revealed by genome-wide screens for L1 regulators. Nature 2018 Jan 11;553(7687):228-232. PMID: 29211708
	GSM2789820	SRR7257060	CONTROL
	GSM2789821	SRR6056852	CONTROL
	GSM2789821	SRR7257061	CONTROL
	GSM2789818	SRR6056849	MPHOSPH8
	GSM2789818	SRR7257058	MPHOSPH8
	GSM2789819	SRR6056850	MPHOSPH8
	GSM2789819	SRR7257059	MPHOSPH8
GSE95633	GSM2520015	SRR5309424	INO80	Xue Y, Pradhan SK, Sun F, Chronis C et al. Mot1, Ino80C, and NC2 Function Coordinately to Regulate Pervasive Transcription in Yeast and Mammals. Mol Cell 2017 Aug 17;67(4):594-607.e4. PMID: 28735899
GSE98119	GSM2587403	SRR5470719	CTCF	Vian L, Pękowska A, Rao SSP, Kieffer-Kwon KR et al. The Energetics and Physiological Impact of Cohesin Extrusion. Cell 2018 May 17;173(5):1165-1178.e20. PMID: 29706548
	GSM2587404	SRR5470720	CTCF
	GSM2587405	SRR5470721	CTCF
	GSM2587406	SRR5470722	CTCF
	GSM2587407	SRR5470723	CTCF
	GSM2587408	SRR5470724	CTCF
GSE98723	GSM2610619	SRR5527787	CBX7	Santanach A, Blanco E, Jiang H, Molloy KR et al. The Polycomb group protein CBX6 is an essential regulator of embryonic stem cell identity. Nat Commun 2017 Nov 1;8(1):1235. PMID: 29089522
	GSM2610620	SRR5527788	CBX7
GSE99938	GSM2665582	SRR5675965	LDB1	Stanulovic VS, Cauchy P, Assi SA, Hoogenkamp M. LMO2 is required for TAL1 DNA binding activity and initiation of definitive haematopoiesis at the haemangioblast stage. Nucleic Acids Res 2017 Sep 29;45(17):9874-9888. PMID: 28973433
	GSM2665582	SRR5675966	LDB1
GSE64825	GSM1581302	SRR1747941	CONTROL	de Dieuleveult M, Yen K, Hmitou I, Depaux A et al. Genome-wide nucleosome specificity and function of chromatin remodellers in ES cells. Nature 2016 Feb 4;530(7588):113-6. PMID: 26814966
	GSM1581303	SRR1747942	CONTROL
	GSM1581300	SRR1747939	EP400
	GSM1581301	SRR1747940	EP400
GSE98063	GSM2586555	SRR5466763	CONTROL	Dorighi KM, Swigut T, Henriques T, Bhanu NV et al. Mll3 and Mll4 Facilitate Enhancer RNA Synthesis and Transcription from Promoters Independently of H3K4 Monomethylation. Mol Cell 2017 May 18;66(4):568-576.e4. PMID: 28483418
	GSM2586549	SRR5466757	POLR2A
	GSM2586550	SRR5466758	POLR2A

## Sheet: 374 pre-ChIP-seq
GEO series	GEO accession	Gene
GSE102753	GSM2746092	EED
	GSM2899074	EED
GSE111264	GSM3318684	ARID1A
	GSM3318685	ARID1A
	GSM3318693	BRD4
	GSM3318686	CONTROL
	GSM3318687	CONTROL
GSE112113	GSM3058057	CONTROL
	GSM3058063	CONTROL
	GSM3058064	CONTROL
	GSM3058065	CONTROL
	GSM3058066	CONTROL
	GSM3058054	MTA2
	GSM3290192	MTA2
GSE11431	GSM288351	CTCF
	GSM288349	E2F1
	GSM288355	ESRRB
	GSM288358	CONTROL
	GSM288354	KLF4
	GSM288345	NANOG
	GSM288346	OCT4
	GSM288347	SOX2
	GSM288360	SUZ12
	GSM288350	TCFCP2I1
	GSM288352	ZFX
	GSM288356	C-MYC
	GSM288357	N-MYC
GSE11724	GSM307154	CONTROL
	GSM307155	CONTROL
	GSM307140	NANOG
	GSM307141	NANOG
	GSM307137	OCT4
	GSM307138	SOX2
	GSM307139	SOX2
	GSM307145	SUZ12
	GSM307142	TCF3
	GSM307143	TCF3
GSE125116	GSM356372	CONTROL
	GSM356373	SMAD2
	GSM356374	SMAD3
GSE13084	GSM327668	EZH2
GSE16526	GSM415050	PCL2
GSE17642	GSM440256	ESET
GSE18371	GSM459283	CONTROL
	GSM459273	SETDB1
	GSM459274	SETDB1
	GSM459275	SETDB1
GSE18588	GSM462292	CONTROL
	GSM462291	KDM2A
GSE18699	GSM465677	CONTROL
	GSM465676	CTCF
GSE18776	GSM480164	CONTROL
	GSM480161	EZH2
	GSM480163	JARID1A
	GSM465889	JARID2
	GSM480162	SUZ12
GSE19019	GSM470524	CONTROL
	GSM470523	NR5A2
GSE19219	GSM478976	CONTROL
	GSM476146	TBX3
GSE19365	GSM480680	SUZ12
GSE19708	GSM491760	JARID2
GSE20530	GSM515666	CTR9
	GSM515664	NELFA
	GSM515665	SPT5
GSE21614	GSM539552	CONTROL
	GSM539541	SMAD3
GSE22162	GSM551138	ATRX
	GSM639380	CONTROL
GSE22303	GSM555160	TBP
	GSM555162	TBP
GSE22557	GSM560349	NIPBL
	GSM560350	NIPBL
GSE22562	GSM560357	CONTROL
	GSM560352	CTCF
	GSM560347	MED1
	GSM560348	MED1
	GSM560345	MED12
	GSM560346	MED12
	GSM560341	SMC1
	GSM560342	SMC1
	GSM560343	SMC3
	GSM560344	SMC3
GSE22934	GSM566281	CONTROL
	GSM566282	CONTROL
	GSM566277	OCT4
	GSM566278	RBBP5
GSE23716	GSM820726	CBX7
	GSM585233	CONTROL
	GSM585234	CONTROL
	GSM585235	CONTROL
	GSM585229	RING1B
GSE23943	GSM590132	EZH2
GSE24029	GSM591471	CONTROL
	GSM591469	RAD21
GSE25409	GSM623991	CONTROL
	GSM623989	PRDM14
GSE25777	GSM634247	CTCF
GSE25778	GSM634248	CONTROL
GSE26136	GSM651192	DPY30
GSE26361	GSM647224	P53
	GSM647226	P53S18P
GSE26680	GSM656526	ATF7IP
	GSM656525	REST
	GSM656523	RING1B
GSE26832	GSM659803	CONTROL
	GSM659804	CONTROL
	GSM659799	TET1
	GSM659800	TET1
GSE27148	GSM671094	REST
	GSM671095	REST
GSE27841	GSM687289	CONTROL
	GSM687278	HDAC1
	GSM687279	HDAC1
	GSM687280	HDAC1
	GSM687277	HDAC1
	GSM687281	KDM1A
	GSM687282	KDM1A
	GSM687284	MI-2B
	GSM687285	REST
GSE28247	GSM699168	CONTROL
	GSM699165	CTCF
GSE28325	GSM700559	CONTROL
	GSM700554	SUZ12
GSE28532	GSM706673	CONTROL
	GSM706672	TET1
GSE29218	GSM723020	CONTROL
	GSM723015	CTCF
GSE30203	GSM747545	CONTROL
	GSM747546	CONTROL
	GSM747534	CTCF
	GSM747535	CTCF
	GSM747536	CTCF
GSE30267	GSM749810	AFF4
	GSM828132	CDK9
	GSM749811	CONTROL
	GSM749824	CONTROL
	GSM749809	ELL2
GSE30919	GSM766454	SMC1A
GSE31270	GSM774941	CONTROL
	GSM774945	CONTROL
	GSM774940	TAF3
	GSM774944	TBP
GSE31690	GSM786608	MBD3
	GSM786609	MBD3
GSE31785	GSM788496	YY1
GSE31966	GSM791782	KDM5B
	GSM791783	KDM5B
GSE33346	GSM824840	CAPD3
	GSM824836	CAPH2
	GSM824838	CONTROL
	GSM824839	CONTROL
	GSM824844	CONTROL
	GSM824841	NCAPD3
	GSM824847	RAD21
	GSM824848	RAD21
GSE34094	GSM841708	CTCF
GSE34518	GSM850474	RING1B
GSE34975	GSM859660	KDM5C
GSE36027	GSM918748	CTCF
GSE36030	GSM1003811	CONTROL
	GSM1003799	HCFC1
GSE36561	GSM937540	BRD4
	GSM896916	STAG1
	GSM937541	STAG1
	GSM896915	STAG2
	GSM937542	STAG2
GSE37262	GSM915093	CONTROL
	GSM915092	NCOA3
GSE37268	GSM915229	CONTROL
	GSM915227	MOF
	GSM915228	MOF
GSE39154	GSM957085	CONTROL
	GSM957084	OGT
GSE39513	GSM970523	CONTROL
	GSM970524	UTF1
GSE40860	GSM1003595	CONTROL
	GSM1003593	KDM2A
GSE41589	GSM1019774	CONTROL
	GSM1019771	SUZ12
GSE41720	GSM1023125	OGT
GSE42152	GSM1033642	CONTROL
	GSM1207789	HIRA
GSE42466	GSM1041373	CBX7
	GSM1041376	CONTROL
	GSM1041377	CONTROL
	GSM1041375	RYBP
GSE43565	GSM1065521	CONTROL
	GSM1065519	CTNNB1
GSE44242	GSM1081158	CBX3
	GSM1081160	CONTROL
GSE44286	GSM1082346	CDK8
	GSM1082347	CDK9
	GSM1082343	CONTROL
GSE45338	GSM2425393	SMARCAD1
GSE45625	GSM1110844	CONTROL
	GSM1110842	TOP2A
GSE46536	GSM1215221	CONTROL
	GSM1215224	CONTROL
	GSM1215219	EHMT2
GSE47082	GSM1144549	CONTROL
	GSM1359837	KDM1A
GSE48122	GSM1169002	CONTROL
	GSM1169006	JARID2
GSE48175	GSM1171651	CONTROL
	GSM1171650	MAX
GSE48666	GSM1183119	CONTROL
	GSM1183112	DMAP1
	GSM1183113	E2F4
	GSM1183115	MAX
	GSM1183118	NANOG
	GSM1183117	NR0B1
	GSM1183114	TIP60
GSE49848	GSM1208219	CONTROL
	GSM1208217	KLF4
	GSM1208218	KLF5
GSE51522	GSM1246866	CREBBP
	GSM1246868	THAP11
GSE51746	GSM1251941	CONTROL
	GSM1251942	CONTROL
	GSM1251943	MCRS1
	GSM1251944	MCRS1
GSE52071	GSM1258240	ASH2L
	GSM1258239	CXXC1
GSE52899	GSM1277674	CONTROL
	GSM1277672	USP16
GSE53087	GSM1282126	KDM5B
GSE53233	GSM1288312	CONTROL
	GSM1288310	SMAD2
GSE53797	GSM1300939	MSL1
GSE55404	GSM1335485	CONTROL
	GSM1335481	TGIF1
GSE55630	GSM1340603	CONTROL
	GSM1340604	JARID2
GSE55657	GSM1341310	CONTROL
	GSM1341311	TDG
GSE56839	GSM1370110	CONTROL
	GSM1370111	NFYA
	GSM1370112	NFYB
	GSM1370113	NFYC
GSE56981	GSM1372574	ATRX
	GSM1372576	ATRX
	GSM1372575	CONTROL
	GSM1372577	CONTROL
GSE57221	GSM1377429	CONTROL
	GSM1377428	E4F1
GSE57700	GSM2065695	CONTROL
	GSM2065694	SALL4
GSE59188	GSM1429923	CONTROL
	GSM1429920	DAXX
GSE59378	GSM1436069	CONTROL
	GSM1436068	NANOG
GSE60027	GSM1463943	CDK8
GSE61188	GSM1499114	CONTROL
	GSM1571964	ZIC3
GSE62864	GSM1534644	HNRNPL
GSE63282	GSM1545026	CONTROL
	GSM1545025	PKNOX1
GSE63974	GSM2299074	CDC73
	GSM2299075	CDC73
	GSM1894005	CONTROL
	GSM1893978	CONTROL
	GSM2299072	LEO1
	GSM2299073	LEO1
	GSM1894007	PAF1
	GSM1894008	PAF1
	GSM1894009	PAF1
GSE64008	GSM1562337	CBX7
	GSM1562338	CONTROL
	GSM1562333	RNF2
GSE64252	GSM2143305	KDM4A
GSE65695	GSM1603268	FGFR1
GSE67867	GSM1657383	CONTROL
	GSM1657381	NRF1
	GSM1657382	NRF1
GSE67944	GSM1659404	BRD2
	GSM1659405	BRD2
GSE69140	GSM1865691	BRD4
	GSM1865692	BRD4
	GSM1693792	CONTROL
	GSM1693793	DDX21
	GSM1693794	HEXIM1
GSE69671	GSM1706504	KAT5
GSE70661	GSM1816096	GTF2B
GSE70799	GSM1819198	CONTROL
	GSM1819199	TRIM28
GSE71675	GSM1842787	CBFA2T2
	GSM1842788	CONTROL
	GSM1842790	PRDM14
GSE73692	GSM1900988	CONTROL
	GSM1900990	PRDM15
GSE74112	GSM1910648	CONTROL
	GSM1910650	CONTROL
	GSM1910638	PARP1
	GSM1910639	PARP1
	GSM1910640	SOX2
	GSM1910642	SOX2
GSE74330	GSM1917300	CONTROL
	GSM1917299	PCGF2
GSE76536	GSM2027604	CONTROL
	GSM2281271	USP7
GSE77779	GSM2059182	DNMT1
GSE78258	GSM2070527	CONTROL
	GSM2070528	CONTROL
	GSM2070529	CONTROL
	GSM2070524	MORC3
	GSM2070525	MORC3
	GSM2070526	MORC3
GSE80034	GSM2111454	NCAPH2
GSE80049	GSM2808659	CONTROL
	GSM2808649	CONTROL
	GSM2808668	DPF2
	GSM2808654	DPF2
	GSM2111707	PHF5A
	GSM2111708	PHF5A
	GSM2111716	RUVBL1
	GSM2111717	RUVBL1
	GSM2111718	RUVBL2
	GSM2111719	RUVBL2
	GSM2111720	SAP18
	GSM2111721	SAP18
	GSM2111725	SMARCA5
	GSM2111726	SMARCA5
	GSM2111731	SSRP1
GSE81081	GSM2142336	SIN3A
GSE84905	GSM2253808	CONTROL
	GSM2253809	PCGF6
	GSM2253810	PCGF6
	GSM2253811	PCGF6
	GSM2253812	PCGF6
GSE85062	GSM2257275	CONTROL
	GSM2257272	POU2F1
GSE87037	GSM2319260	BRD4
	GSM2319553	CONTROL
GSE87820	GSM2521508	SS18
	GSM2521509	SS18
	GSM2521510	SS18
GSE88823	GSM2349433	CBX7
	GSM2349434	CONTROL
GSE89209	GSM2360933	CONTROL
	GSM2360934	EP300
GSE89810	GSM2389985	CONTROL
	GSM2389981	DGCR8
GSE89810	GSM2389982	DROSHA
GSE89929	GSM2393581	CBX7
	GSM2393592	CONTROL
	GSM2393593	CONTROL
	GSM2393580	PHC1
GSE90893	GSM2417127	CONTROL
	GSM2417144	KLF4
GSE92257	GSM2424702	CONTROL
	GSM2424700	METTL3
	GSM2424701	METTL3
GSE95374	GSM2789820	CONTROL
	GSM2789821	CONTROL
	GSM2789818	MPHOSPH8
	GSM2789819	MPHOSPH8
GSE95633	GSM2520015	INO80
GSE98119	GSM2587403	CTCF
	GSM2587404	CTCF
	GSM2587405	CTCF
	GSM2587406	CTCF
	GSM2587407	CTCF
	GSM2587408	CTCF
GSE98723	GSM2610619	CBX7
	GSM2610620	CBX7
GSE99938	GSM2665582	LDB1
GSE64825	GSM1581302	CONTROL
	GSM1581303	CONTROL
	GSM1581300	EP400
	GSM1581301	EP400
GSE98063	GSM2586555	CONTROL
	GSM2586549	POLR2A
	GSM2586550	POLR2A

## Sheet: 171 post-ChIP-seq
PRC	p53	REST	CTCF	PCGF	PAF	TBX	Core	MYC
GSE18776_EZH2	GSE26361_P53	GSE26680_REST	GSE29218_CTCF	GSE70799_TRIM28	GSE20530_CTR9	GSE80049_SSRP1	GSE74112_SOX2	GSE51746_MCRS1
GSE55630_JARID2	GSE26361_P53S18P	GSE27841_REST	GSE36027_CTCF	GSE26680_ATF7IP	GSE44242_CBX3	GSE80034_NCAPH2	GSE11724_NANOG	GSE20530_NELFA
GSE19365_SUZ12		GSE27148_REST	GSE33346_RAD21	GSE18371_SETDB1	GSE63974_CDC73	GSE85062_POU2F1	GSE59378_NANOG	GSE36030_HCFC1
GSE18776_JARID2			GSE18699_CTCF	GSE17642_ESET	GSE63974_LEO1	GSE42152_HIRA	GSE57700_SALL4	GSE11431_ZFX
GSE42466_CBX7			GSE98119_CTCF	GSE84905_PCGF6	GSE63974_PAF1	GSE22162_ATRX	GSE11724_OCT4	GSE87037_BRD4
GSE11724_SUZ12			GSE30203_CTCF		GSE92257_METTL3	GSE45338_SMARCAD1	GSE27841_CHD4	GSE18588_KDM2A
GSE74330_PCGF2			GSE28247_CTCF			GSE78258_MORC3	GSE111264_ARID1A	GSE40860_KDM2A
GSE88823_CBX7			GSE11431_CTCF			GSE80049_DPF2	GSE25409_PRDM14	GSE31785_YY1
GSE23716_RING1B			GSE36561_STAG2			GSE19219_TBX3	GSE52071_ASH2L	GSE64252_KDM4A
GSE26680_RING1B			GSE36561_STAG1			GSE80049_PHF5A	GSE112113_MTA2	GSE95633_INO80
GSE19708_JARID2			GSE24029_RAD21			GSE80049_SMARCA5	GSE87820_SS18	GSE31270_TAF3
GSE16526_PCL2			GSE30919_SMC1A			GSE62864_HNRNPL	GSE21614_SMAD3	GSE69140_DDX21
GSE48122_JARID2			GSE34094_CTCF			GSE31690_MBD3	GSE51522_CREBBP	GSE55657_TDG
GSE23943_EZH2			GSE22562_CTCF			GSE31966_KDM5B	GSE27841_HDAC1	GSE48666_TIP60
GSE13084_EZH2			GSE22562_SMC1			GSE80049_RUVBL1	GSE11431_SOX2	GSE37268_MOF
GSE23716_CBX7			GSE22562_SMC3			GSE80049_RUVBL2	GSE11431_NANOG	GSE48666_MAX
GSE64008_CBX7			GSE25777_CTCF			GSE77779_DNMT1	GSE11724_TCF3	GSE48666_DMAP1
GSE89929_CBX7						GSE80049_SAP18	GSE33346_CAPH2	GSE48666_E2F4
GSE11431_SUZ12						GSE51522_THAP11	GSE22562_MED12	GSE67944_BRD2
GSE102753_EED						GSE53087_KDM5B	GSE22562_MED1	GSE22934_RBBP5
GSE34518_RING1B						GSE95374_MPHOSPH8	GSE36561_BRD4	GSE26136_DPY30
GSE41589_SUZ12							GSE22557_NIPBL	GSE81081_SIN3A
GSE18776_SUZ12							GSE48666_NR0B1	GSE69671_KAT5
GSE28325_SUZ12							GSE11431_ESRRB	GSE70661_GTF2B
GSE26832_TET1							GSE19019_NR5A2	GSE31270_TBP
GSE39513_UTF1							GSE22934_Oct4	GSE52899_USP16
GSE69140_HEXIM1							GSE11431_oct4	GSE18776_JARID1A
GSE39154_OGT							GSE30267_ELL2	GSE64825_EP400
GSE28532_TET1							GSE30267_AFF4	GSE52071_CXXC1
							GSE44286_CDK8	GSE33346_CAPD3
							GSE111264_BRD4	GSE22303_TBP
							GSE44286_CDK9	GSE67867_NRF1
							GSE60027_CDK8	GSE11431_NMYC
							GSE49848_KLF5	GSE11431_CMYC
							GSE125116_SMAD2	GSE48175_MAX
							GSE53233_SMAD2	GSE95633_POLR2A
							GSE89209_EP300	GSE64008_RNF2
							GSE55404_TGIF1	GSE69140_BRD4
							GSE11431_KLF4	GSE11431_E2F1
							GSE11431_TCFCP2I1	GSE20530_SPT5
							GSE46536_EHMT2	GSE56839_NFYB
								GSE56839_NFYC
								GSE56839_NFYA
								GSE74112_PARP1
								GSE47082_KDM1A
								GSE34975_KDM5C
								GSE53797_MSL1

## Sheet: 126 post-genes
PRC	p53	REST	CTCF	PCGF	PAF	TBX	Core	MYC
RING1B	P53	REST	CTCF	TRIM28	CTR9	POU2F1	OCT4	MYC
CBX7			RAD21	ATF7IP	CBX3	TBX3	NANOG	NMYC
PCGF2			STAG2	SETDB1	CDC73	DPF2	SOX2	MAX
EZH2			STAG1	ESET	LEO1	THAP11	ESRRB	DMAP1
SUZ12			SMC1A	PCGF6	PAF1	NCAPH2	PRDM14	ZFX
JARID2			SMC1		METTL3	ATRX	NR5A2	E2F1
PCL2			SMC3			SMARCAD1	TCF3	E2F4
EED						SMARCA5	BRD4	TBP
TET1						MBD3	SALL4	TAF3
UTF1						RUVBL1	TCFCP2I1	GTF2B
HEXIM1						RUVBL2	CHD4	NFYB
OGT						MORC3	MTA2	NFYC
						KDM5B	SMAD2	NFYA
						HIRA	SMAD3	NRF1
						SAP18	TGIF1	HCFC1
						PHF5A	ELL2	CXXC1
						SSRP1	AFF4	JARID1A
						HNRNPL	CDK9	KDM1A
						DNMT1	ARID1A	KDM2A
						MPHOSPH8	HDAC1	KDM4A
							ASH2L	RBBP5
							EHMT2	DPY30
							CREBBP	BRD2
							EP300	BRD4
							MED1	SIN3A
							MED12	MCRS1
							CDK8	KAT5
							CAPH2	MOF
							NIPBL	USP16
							SS18	YY1
							DAX1	RNF2
							KLF4	CAPD3
								TIP60
								EP400
								INO80
								DDX21
								NELFA
								SPT5
								TDG
								PARP1
								POLR2A
								MSL1
								KDM5C

## Sheet: Transcriptional regulators
59 known genes	86 new genes	126 genes
NANOG	ARID1A	PCGF2
SOX2	ASH2L	EED
E2F1	ATF7IP	UTF1
TCFCP2I1	BRD2	HEXIM1
CTCF	CBFA2T2	OGT
ZFX	CBX3	SMC1A
KLF4	CDC73	TRIM28
ESRRB	CDK8	ATF7IP
N-MYC	CDK9	PCGF6
SUZ12	CREBBP	CBX3
OCT4	CTNNB1	CDC73
TCF3	CXXC1	LEO1
EZH2	DAXX	PAF1
PCL2	DDX21	METTL3
ESET	DGCR8	POU2F1
SETDB1	DNMT1	TBX3
KDM2A	DPF2	DPF2
JARID2	DROSHA	THAP11
JARID1A	E4F1	NCAPH2
NR5A2	EED	SMARCAD1
NELFA	EHMT2	SMARCA5
SPT5	EP300	RUVBL1
CTR9	EP400	RUVBL2
SMAD3	FGFR1	MORC3
ATRX	GTF2B	HIRA
TBP	HCFC1	SAP18
SMC1	HEXIM1	PHF5A
SMC3	HIRA	SSRP1
MED12	HNRNPL	HNRNPL
MED1	INO80	DNMT1
RING1B	KAT5	MPHOSPH8
CBX7	KDM1A	SALL4
RAD21	KDM4A	MI-2B
PRDM14	KDM5C	MTA2
DPY30	KLF5	SMAD2
P53	LDB1	TGIF1
P53S18P	LEO1	CDK9
REST	MCRS1	ARID1A
TET1	METTL3	ASH2L
HDAC1	MORC3	EHMT2
MI-2B	MPHOSPH8	CREBBP
ELL2	MSL1	EP300
AFF4	MTA2	CDK8
TAF3	NCAPD3	NIPBL
MBD3	NCAPH2	SS18
YY1	NCOA3	NMYC
KDM5B	NFYA	GTF2B
CAPH2	NFYB	NFYB
CAPD3	NFYC	NFYC
STAG2	NIPBL	NFYA
STAG1	NRF1	NRF1
BRD4	OGT	HCFC1
MOF	PAF1	CXXC1
MYC	PARP1	KDM1A
DMAP1	PCGF2	KDM4A
E2F4	PCGF6	RBBP5
TIP60	PHC1	BRD2
MAX	PHF5A	SIN3A
DAX1	PKNOX1	MCRS1
	POLR2A	KAT5
	POU2F1	USP16
	PRDM15	RNF2
	RBBP5	EP400
	RNF2	INO80
	RUVBL1	DDX21
	RUVBL2	TDG
	RYBP	PARP1
	SALL4	POLR2A
	SAP18	MSL1
	SIN3A	KDM5C
	SMAD2	RING1B
	SMARCA5	CBX7
	SMARCAD1	EZH2
	SMC1A	SUZ12
	SS18	JARID2
	SSRP1	PCL2
	TBX3	TET1
	TDG	P53
	TGIF1	REST
	THAP11	CTCF
	TOP2A	RAD21
	TRIM28	STAG2
	USP16	STAG1
	USP7	SMC1
	UTF1	SMC3
	ZIC3	SETDB1
		ESET
		CTR9
		ATRX
		MBD3
		KDM5B
		OCT4
		NANOG
		SOX2
		ESRRB
		PRDM14
		NR5A2
		TCF3
		BRD4
		TCFCP2I1
		SMAD3
		ELL2
		AFF4
		HDAC1
		MED1
		MED12
		CAPH2
		DAX1
		KLF4
		MYC
		MAX
		DMAP1
		ZFX
		E2F1
		E2F4
		TBP
		TAF3
		JARID1A
		KDM2A
		DPY30
		MOF
		YY1
		CAPD3
		TIP60
		NELFA
		SPT5
