# Supplementary material for: A multi-omics integrative analysis based on CRISPR screens re-defines the pluripotency regulatory network in ESCs
Source: Research Square preprint supplement (doi:10.21203/rs.3.rs-951395/v1), 2023-03-13
Supplement: Supplementary file 7 [file Supplementary Data8.xlsx]

## Sheet: Sheet1
CORE				MYC				PRC				CTCF				PCGF				PAF				TBX				p53				REST
chr1	36982205	36988978		chr1	86342214	86361236		chr1	19207410	19215493		chr1	33739330	33739687		chr1	117253608	117255099		chr1	39367907	39376196		chr1	195371521	195372207		chr1	4400073	4400195		chr1	3670769	3670913
chr1	131889950	131891878		chr1	86523792	86530117		chr1	56968061	56985159		chr1	63180958	63181365		chr1	125348904	125349596		chr1	59696822	59698333		chr1	183298978	183299782		chr1	4788503	4788653		chr1	5022864	5022990
chr1	182027757	182031533		chr1	128358821	128360174		chr1	74854651	74857591		chr1	80181013	80181357		chr1	5809745	5810549		chr1	86342042	86357923		chr1	182629627	182630145		chr1	4916084	4916247		chr1	8123217	8123336
chr1	13084447	13085706		chr1	86486609	86491025		chr1	74947629	74953203		chr1	85114704	85115046		chr1	10735412	10736013		chr1	86530425	86533246		chr1	193227591	193228148		chr1	5044439	5044585		chr1	9298517	9298685
chr1	101756381	101757881		chr1	93477897	93479814		chr1	78187210	78206363		chr1	85323186	85323559		chr1	19799415	19800027		chr1	161035052	161041619		chr1	195241354	195242083		chr1	5396916	5397033		chr1	17145579	17145697
chr1	119074814	119077335		chr1	156035203	156036783		chr1	135917671	135920462		chr1	85581620	85581957		chr1	55779332	55779908		chr1	178318414	178335524		chr1	44201034	44201543		chr1	6424072	6424218		chr1	19109810	19109926
chr1	12744218	12745590		chr1	191574237	191576598		chr1	155732463	155744722		chr1	85853366	85853615		chr1	58931749	58932519		chr1	178335697	178337807		chr1	192453806	192454356		chr1	6486787	6486907		chr1	25228705	25228870
chr1	36013354	36015045		chr1	52231915	52233895		chr1	184716612	184736180		chr1	86178855	86179206		chr1	64965909	64966624		chr1	9938381	9944292		chr1	195278979	195279509		chr1	7500880	7500996		chr1	25364324	25364427
chr1	118647425	118648762		chr1	55026558	55028265		chr1	190168082	190176319		chr1	88742400	88742701		chr1	97173601	97174305		chr1	16098649	16104374		chr1	19176033	19176571		chr1	7563995	7564169		chr1	34579635	34579760
chr1	119303790	119306412		chr1	160211000	160214218		chr1	4490381	4498789		chr1	89943259	89943655		chr1	138311036	138312366		chr1	20800472	20801688		chr1	58613814	58614105		chr1	7739383	7739509		chr1	35017599	35017735
chr1	133492066	133493942		chr1	43933132	43934583		chr1	19233656	19242405		chr1	119345426	119345757		chr1	188341601	188342512		chr1	24611504	24616192		chr1	71079106	71079621		chr1	8916687	8916820		chr1	37218477	37218678
chr1	135198411	135199862		chr1	57995482	57996751		chr1	42684035	42689693		chr1	122439336	122439736		chr1	8157169	8157684		chr1	30801205	30802128		chr1	100738656	100739184		chr1	9639047	9639221		chr1	56839045	56839159
chr1	136694797	136697085		chr1	92933889	92935080		chr1	42711501	42715058		chr1	131982877	131983214		chr1	19998785	19999328		chr1	36103402	36107080		chr1	122356944	122357474		chr1	9995762	9995922		chr1	70725702	70725829
chr1	180924345	180925498		chr1	131525222	131528629		chr1	62702257	62708674		chr1	132157402	132157688		chr1	28458238	28458670		chr1	36789039	36791322		chr1	22555675	22556197		chr1	12344937	12345052		chr1	72537084	72537217
chr1	62767388	62768321		chr1	133129248	133133052		chr1	74799461	74805262		chr1	132237631	132237909		chr1	30067065	30067646		chr1	55075511	55078123		chr1	46732348	46732861		chr1	12610811	12610947		chr1	74857274	74857396
chr1	153095055	153097741		chr1	178317317	178333552		chr1	74880846	74887233		chr1	152790235	152790851		chr1	30689443	30689960		chr1	58406504	58411208		chr1	69456520	69457091		chr1	13502019	13502189		chr1	74858157	74858336
chr1	182181293	182182986		chr1	180849762	180851690		chr1	78213974	78219489		chr1	154786291	154786555		chr1	44959858	44960767		chr1	59684990	59688957		chr1	167340065	167340732		chr1	13605417	13605579		chr1	74891641	74891788
chr1	72213872	72214957		chr10	81176229	81183407		chr1	78309440	78312722		chr1	160062004	160062413		chr1	46978751	46979227		chr1	59711575	59712380		chr1	73853318	73853829		chr1	14689446	14689554		chr1	75263138	75263252
chr1	86310541	86312056		chr10	80292063	80296622		chr1	87152636	87157622		chr1	161748211	161748451		chr1	47180773	47181500		chr1	59712754	59713908		chr1	178539469	178539970		chr1	15920131	15920280		chr1	75277368	75277464
chr1	119396908	119399702		chr10	119238931	119241297		chr1	87263238	87266559		chr1	164138425	164139206		chr1	53235838	53236334		chr1	59716328	59716667		chr1	24611560	24616170		chr1	16680774	16680932		chr1	79439944	79440115
chr1	128392300	128393071		chr10	128057961	128060490		chr1	89926826	89936223		chr1	167369948	167370227		chr1	57308720	57309210		chr1	59716874	59721633		chr1	64133769	64134140		chr1	16930744	16930861		chr1	84696300	84696445
chr1	132193277	132201989		chr11	55467625	55471857		chr1	91799995	91803223		chr1	167637028	167637438		chr1	61498517	61499494		chr1	63177145	63182103		chr1	102627974	102628548		chr1	21537918	21538040		chr1	85080822	85080980
chr1	132469959	132472307		chr11	88046215	88049247		chr1	120339581	120343806		chr1	172309683	172310456		chr1	66023157	66023449		chr1	64725481	64726996		chr1	136364670	136365380		chr1	22181960	22182068		chr1	85179737	85179896
chr1	133693672	133695274		chr11	60536255	60539361		chr1	120595361	120607577		chr1	176223210	176223518		chr1	74658999	74659690		chr1	64729221	64734356		chr1	56781859	56782595		chr1	22283041	22283213		chr1	85500323	85500493
chr1	134403668	134407101		chr11	106786588	106790066		chr1	131243268	131246202		chr1	180720354	180720722		chr1	81569668	81570203		chr1	71642887	71643734		chr1	147769561	147770062		chr1	22997760	22997892		chr1	90028462	90028635
chr1	166123807	166125968		chr11	86756468	86758983		chr1	134645699	134648265		chr10	7333303	7333682		chr1	81692313	81693066		chr1	72711232	72712478		chr10	130594232	130595203		chr1	23639560	23639683		chr1	91743029	91743118
chr1	11276399	11278544		chr11	22990199	22991883		chr1	138837799	138845043		chr10	7883539	7883948		chr1	85057067	85057973		chr1	72712586	72717772		chr10	29970730	29971273		chr1	25128896	25129013		chr1	93272697	93272801
chr1	36059773	36061776		chr11	33146728	33164326		chr1	167687092	167693729		chr10	17733002	17733426		chr1	93957568	93958107		chr1	86358048	86359441		chr10	22142270	22143237		chr1	25467303	25467441		chr1	99772308	99772460
chr1	52951583	52954134		chr11	58102557	58104889		chr1	178527183	178531069		chr10	24298533	24298973		chr1	95517202	95517765		chr1	86526701	86530252		chr10	20459548	20460130		chr1	27122341	27122481		chr1	115684679	115684780
chr1	53749413	53751660		chr11	74896284	74898866		chr1	187603913	187610290		chr10	40212442	40212777		chr1	101983723	101984257		chr1	131937685	131939462		chr10	37820233	37820762		chr1	30432713	30432826		chr1	118748817	118748941
chr1	59697032	59698617		chr11	3648287	3650005		chr10	13963049	13968710		chr10	53348210	53348656		chr1	103032560	103033193		chr1	131940255	131942054		chr10	94871919	94872454		chr1	30874904	30875027		chr1	119417726	119417813
chr1	62181412	62182303		chr11	44469602	44471152		chr10	23346833	23351295		chr10	56339074	56339456		chr1	113017068	113017610		chr1	134344221	134345145		chr10	102668397	102668932		chr1	30875912	30876025		chr1	120331939	120332115
chr1	72228635	72230478		chr11	50324374	50326913		chr10	42587639	42595093		chr10	59296338	59296748		chr1	131307943	131308466		chr1	134405556	134407680		chr10	4614184	4614712		chr1	31778344	31778461		chr1	120390469	120390594
chr1	84859527	84863033		chr11	50376612	50378799		chr10	60829441	60831846		chr10	60245106	60245479		chr1	139641193	139641855		chr1	136793084	136793767		chr10	13401876	13402435		chr1	32891517	32891663		chr1	124845768	124845820
chr1	86486665	86489508		chr11	60877883	60879915		chr10	84754273	84761113		chr10	62261159	62261587		chr1	157612632	157613441		chr1	152832925	152835769		chr10	72293134	72293652		chr1	33799739	33799878		chr1	127496853	127497021
chr1	110774057	110775374		chr11	75347774	75348968		chr10	7390131	7394283		chr10	64084427	64084776		chr1	169174754	169175537		chr1	153447182	153455582		chr10	114737149	114737674		chr1	34344580	34344691		chr1	132188564	132188675
chr1	139493993	139495724		chr11	101441929	101445476		chr10	19354117	19358488		chr10	70563667	70564034		chr1	175046773	175047455		chr1	153455854	153457001		chr10	129735231	129735764		chr1	35629557	35629710		chr1	132306950	132307080
chr1	164503136	164504090		chr11	102406465	102409406		chr10	19848248	19853071		chr10	75832290	75832538		chr1	179636058	179636518		chr1	153458038	153460057		chr10	94592191	94592734		chr1	36040467	36040612		chr1	132733954	132734074
chr1	180887214	180890364		chr11	106997947	107000443		chr10	30841173	30845718		chr10	75897398	75897644		chr1	192577247	192577802		chr1	153460288	153463257		chr10	52144246	52144751		chr1	36831617	36831716		chr1	132799406	132799532
chr1	8940249	8941943		chr11	120483973	120485360		chr10	39925824	39928120		chr10	79925229	79925644		chr10	3606477	3607036		chr1	153463390	153464392		chr10	82954919	82955583		chr1	36903820	36903965		chr1	134664935	134665099
chr1	13073717	13075208		chr11	5097732	5100457		chr10	42576563	42587524		chr10	87024951	87025264		chr10	129394210	129395001		chr1	153468359	153471306		chr10	121763122	121763510		chr1	38128418	38128552		chr1	135634900	135635054
chr1	17250064	17251285		chr11	6523365	6529723		chr10	42630678	42634958		chr10	89461900	89462265		chr10	15634935	15635564		chr1	153474038	153477244		chr11	121982145	121982763		chr1	39907048	39907179		chr1	146106977	146107175
chr1	59422862	59424009		chr11	11807171	11810942		chr10	43172067	43175975		chr10	94461400	94461701		chr10	21046178	21046726		chr1	153478020	153484384		chr11	54139860	54140869		chr1	41213634	41213793		chr1	152956363	152956494
chr1	72242511	72245227		chr11	51604613	51607575		chr10	52021151	52026401		chr10	95475903	95476313		chr10	30815018	30815525		chr1	153484496	153487668		chr11	109011436	109012268		chr1	42541346	42541445		chr1	154723643	154723759
chr1	74824552	74825486		chr11	53297212	53302130		chr10	58812187	58814554		chr10	99615802	99616165		chr10	32181869	32182347		chr1	180800830	180802596		chr11	3100202	3103022		chr1	43143927	43144075		chr1	155594263	155594425
chr1	113957774	113960076		chr11	62456487	62459840		chr10	67534269	67540976		chr10	109920754	109921114		chr10	47637783	47638352		chr1	181892721	181901435		chr11	51455415	51456029		chr1	43316278	43316416		chr1	158019291	158019442
chr1	134533641	134536156		chr11	62549493	62556778		chr10	79919989	79922494		chr10	118370457	118370781		chr10	51132134	51132830		chr1	181923244	181924213		chr11	110422044	110422560		chr1	47008685	47008818		chr1	158464219	158464299
chr1	136568855	136570819		chr11	62601892	62608469		chr10	80488897	80498632		chr10	118592672	118593029		chr10	65643418	65643898		chr10	62877259	62880163		chr11	3103591	3104299		chr1	49537249	49537407		chr1	159524239	159524328
chr1	182162788	182163460		chr11	78549952	78551706		chr10	80502136	80504464		chr10	122051865	122052239		chr10	94367662	94368376		chr10	80128937	80132597		chr11	57302410	57302939		chr1	51678595	51678713		chr1	164142777	164142923
chr1	34073549	34075350		chr11	79991595	79994652		chr10	87490902	87495434		chr10	126919066	126919563		chr10	97328003	97328563		chr10	81176599	81183382		chr11	107199152	107199776		chr1	52312725	52312903		chr1	166964603	166964764
chr1	34102611	34104385		chr11	101315164	101317089		chr10	90828324	90831564		chr10	127674660	127675088		chr10	99339961	99340604		chr10	5797251	5798942		chr11	64682367	64682882		chr1	52320736	52320877		chr1	167079630	167079728
chr1	35943888	35944802		chr11	116842405	116844238		chr10	103026200	103031095		chr11	3185860	3186163		chr10	104576881	104577480		chr10	21995439	22001083		chr11	89081495	89082202		chr1	53527746	53527929		chr1	167123686	167123816
chr1	54484566	54485433		chr11	118288768	118290821		chr10	114800020	114803281		chr11	3472494	3472847		chr10	116611627	116612414		chr10	23780579	23787256		chr11	3191755	3194343		chr1	54118493	54118601		chr1	167187922	167188049
chr1	60850685	60851548		chr11	119299284	119300675		chr10	120473815	120478612		chr11	3514444	3514852		chr10	121165726	121166264		chr10	61425012	61427433		chr11	40825077	40825578		chr1	54844434	54844556		chr1	173361758	173361971
chr1	64732119	64738322		chr11	120572304	120574814		chr11	21992555	22005197		chr11	6187829	6188176		chr10	129278565	129279012		chr10	62837853	62842493		chr12	3109628	3110351		chr1	55039454	55039636		chr1	176697202	176697378
chr1	71645894	71646536		chr12	40222092	40223791		chr11	24073591	24083925		chr11	6261724	6262289		chr11	23224164	23224884		chr10	62856743	62857406		chr12	120028458	120029253		chr1	55495544	55495689		chr1	177382947	177383104
chr1	133397409	133398315		chr12	78860640	78862742		chr11	57826918	57834608		chr11	8424179	8424623		chr11	29331760	29332300		chr10	68091438	68092257		chr12	93576778	93577445		chr1	56568908	56569040		chr1	193036099	193036212
chr1	153007849	153011190		chr12	111537102	111539466		chr11	75165246	75173952		chr11	11557122	11557578		chr11	88916546	88917210		chr10	79688271	79690746		chr12	67059069	67060123		chr1	57469882	57469991		chr1	GL456210	random
chr1	160734324	160735270		chr12	80642712	80644890		chr11	82386196	82391617		chr11	11973217	11973800		chr11	117500750	117501411		chr10	79861865	79865983		chr12	74803685	74804618		chr1	58052319	58052518		chr1	GL456210	random
chr10	44391420	44393229		chr12	72760179	72762479		chr11	85828500	85845098		chr11	35367208	35367742		chr11	15883744	15884193		chr10	80292445	80295624		chr12	16747595	16748160		chr1	58519444	58519587		chr1	GL456211	random
chr10	85537958	85540578		chr12	8920817	8923118		chr11	85885496	85896553		chr11	36045679	36046088		chr11	28098262	28098825		chr10	81149563	81153952		chr12	78350653	78351336		chr1	58650507	58650702		chr1	GL456212	random
chr10	58530776	58532752		chr12	69183000	69185010		chr11	96172242	96179584		chr11	46431207	46431553		chr11	41016538	41017067		chr10	81364539	81367621		chr12	41514882	41515424		chr1	59431571	59431719		chr1	GL456221	random
chr10	4289184	4290873		chr12	83631373	83633488		chr11	96278662	96307573		chr11	47658132	47658554		chr11	55246509	55247133		chr10	127066556	127069959		chr12	105524511	105525038		chr1	60350412	60350571		chr10	5639237	5639384
chr10	85070956	85072393		chr12	86945956	86948102		chr11	96335731	96355893		chr11	50769378	50769915		chr11	82336816	82337316		chr10	128048634	128051410		chr12	73772067	73772589		chr1	60545860	60545989		chr10	6788795	6788958
chr10	21988247	21989017		chr12	101082399	101084460		chr11	112779778	112786777		chr11	52143735	52144115		chr11	92100104	92100610		chr10	128076983	128080044		chr12	97061244	97061872		chr1	60548378	60548563		chr10	7589767	7589922
chr10	61414924	61419729		chr12	116280205	116282273		chr11	119034110	119044460		chr11	55158792	55159163		chr11	100663874	100664484		chr10	128547329	128549152		chr12	102892734	102893240		chr1	63195095	63195260		chr10	11081590	11081706
chr10	80050001	80054755		chr13	58400609	58403440		chr11	119079013	119091911		chr11	55446632	55447018		chr11	120322074	120322670		chr10	128557010	128557875		chr12	99644904	99645874		chr1	63320001	63320100		chr10	12106983	12107111
chr10	88684828	88685758		chr13	21715176	21719147		chr11	119545757	119550471		chr11	59778538	59778826		chr12	62176924	62178368		chr10	128622761	128626476		chr12	7925977	7926469		chr1	63944892	63945033		chr10	26082217	26082349
chr10	108286181	108288264		chr13	21808900	21812478		chr11	19012470	19022535		chr11	61104319	61104913		chr12	65806765	65807323		chr11	6419788	6421401		chr13	120321232	120321863		chr1	65041964	65042178		chr10	29146966	29147080
chr10	21101483	21102603		chr13	21830999	21835129		chr11	33195823	33205544		chr11	61349425	61349835		chr12	48670851	48671378		chr11	48800345	48809682		chr13	77438668	77439296		chr1	65110188	65110348		chr10	39967638	39967808
chr10	4332155	4334008		chr13	23532780	23536776		chr11	44614916	44622765		chr11	62277985	62278446		chr12	76745514	76746132		chr11	62552063	62555570		chr13	110743790	110744707		chr1	65131733	65131863		chr10	41071862	41071982
chr10	34233128	34235692		chr13	21752675	21755164		chr11	50600809	50604748		chr11	69715484	69715944		chr12	11031525	11032129		chr11	62602756	62609723		chr13	13860383	13861242		chr1	66398361	66398466		chr10	60914522	60914684
chr10	62896590	62899515		chr13	23570108	23572738		chr11	53477600	53480522		chr11	70110143	70110511		chr12	14440680	14441382		chr11	78178437	78183573		chr13	74528394	74530822		chr1	66982655	66982794		chr10	60943230	60943336
chr10	95890594	95892755		chr13	23573050	23577134		chr11	63918717	63925622		chr11	72428556	72428865		chr12	17959917	17960277		chr11	100320034	100324190		chr13	110602812	110603360		chr1	69121686	69121807		chr10	70598432	70598550
chr10	67095637	67101265		chr13	80882468	80886736		chr11	64435013	64438114		chr11	75903270	75903863		chr12	19325755	19326135		chr11	120343631	120348529		chr13	116192670	116193209		chr1	71105046	71105192		chr10	71428357	71428530
chr10	77190922	77194739		chr13	81782674	81784258		chr11	68383253	68387827		chr11	76406543	76406915		chr12	24396474	24397016		chr11	6415847	6418183		chr13	3372804	3373720		chr1	71496244	71496338		chr10	76958336	76958469
chr10	17579266	17580007		chr14	21051653	21053210		chr11	75192807	75195673		chr11	78399689	78400039		chr12	38048442	38049125		chr11	6523548	6526920		chr13	53269661	53270219		chr1	73411568	73411723		chr10	76978156	76978291
chr10	21828661	21829852		chr14	66296422	66298185		chr11	77930380	77932967		chr11	79030477	79030879		chr12	39431985	39432304		chr11	23007122	23007821		chr13	60676351	60676901		chr1	73453034	73453190		chr10	77867685	77867801
chr10	30736962	30738124		chr14	57825558	57827347		chr11	84518219	84530734		chr11	80351802	80352084		chr12	42872963	42873598		chr11	29543956	29547917		chr13	119595600	119599366		chr1	73546511	73546649		chr10	79718085	79718225
chr10	36611177	36612224		chr14	67714749	67716917		chr11	95119496	95124121		chr11	82174887	82175147		chr12	61705047	61705570		chr11	33148006	33163098		chr13	115742016	115742557		chr1	73893663	73893799		chr10	80748740	80748909
chr10	56373960	56374803		chr15	102669055	102674104		chr11	96269065	96278319		chr11	82819331	82819702		chr12	62548641	62549745		chr11	50386354	50388332		chr13	9834119	9834741		chr1	74337837	74337958		chr10	81037441	81037601
chr10	68136063	68138863		chr15	103238625	103249804		chr11	96309316	96335054		chr11	86836461	86836821		chr12	65033748	65034255		chr11	51590699	51606786		chr13	93940966	93941497		chr1	75028416	75028552		chr10	81477702	81477819
chr10	75881683	75882838		chr15	58133856	58136514		chr11	98323658	98330089		chr11	94133249	94134045		chr12	93259091	93259710		chr11	51623071	51626170		chr13	44869347	44870251		chr1	77187518	77187625		chr10	84754919	84755008
chr10	95718408	95720089		chr15	80253804	80259895		chr11	102604119	102607579		chr11	95106789	95107273		chr12	118794907	118795481		chr11	55500507	55504568		chr13	77304737	77305248		chr1	80221268	80221383		chr10	87586833	87586968
chr10	110854433	110856447		chr15	81871081	81873048		chr11	102664709	102666462		chr11	95876313	95876722		chr12	120028611	120029079		chr11	68901534	68907440		chr13	112577955	112578780		chr1	81579352	81579521		chr10	89224670	89224807
chr10	116561752	116563531		chr15	31600837	31602942		chr11	102944816	102946831		chr11	100295324	100295690		chr13	33862949	33863582		chr11	69664983	69673209		chr13	42436501	42437036		chr1	83863789	83863893		chr10	90771527	90771636
chr10	21745920	21746659		chr16	15636842	15638342		chr11	114064224	114067734		chr11	100893455	100893750		chr13	29885062	29885794		chr11	69914165	69920594		chr13	97190316	97190844		chr1	83981348	83981523		chr10	90823576	90823690
chr10	23812928	23813950		chr16	91646070	91648646		chr11	115857987	115860445		chr11	101323595	101323989		chr13	4339371	4339973		chr11	72451393	72453753		chr13	99790738	99791265		chr1	83989346	83989488		chr10	90827074	90827204
chr10	62892332	62893859		chr16	16302288	16304141		chr11	119053760	119060093		chr11	101658816	101659106		chr13	5177254	5177742		chr11	74670245	74673925		chr13	113171893	113172460		chr1	84773007	84773161		chr10	94305633	94305752
chr10	67083490	67084353		chr16	84834302	84836492		chr12	8296977	8303033		chr11	103102717	103103007		chr13	8023795	8024254		chr11	80034206	80036594		chr13	9011548	9012386		chr1	86767481	86767646		chr10	99095241	99095344
chr10	95455903	95456663		chr17	14976888	14979838		chr12	49372820	49387241		chr11	103168614	103169142		chr13	10602753	10603307		chr11	97775553	97779663		chr13	119599561	119602664		chr1	87058926	87059060		chr10	110676632	110676770
chr11	9116909	9119974		chr17	15008203	15011009		chr12	56518439	56521955		chr11	104195819	104196279		chr13	19000451	19000765		chr11	97779873	97782399		chr13	3373931	3374330		chr1	87494861	87494975		chr10	112423444	112423599
chr11	20230296	20232168		chr17	15039634	15042419		chr12	56527002	56538424		chr11	106627716	106628130		chr13	34172342	34172818		chr11	98030449	98031769		chr14	19415624	19419765		chr1	87676059	87676294		chr10	115184916	115185056
chr11	62508437	62513929		chr17	34108981	34123078		chr12	56687544	56701589		chr11	107385285	107385751		chr13	62419179	62420338		chr11	106500752	106503257		chr14	86198772	86199383		chr1	89513889	89513994		chr10	126681017	126681318
chr11	97658204	97663133		chr17	24717317	24723724		chr12	73049320	73054641		chr11	109585090	109585476		chr13	63162139	63162740		chr11	106779152	106787996		chr14	124801391	124802433		chr1	90057664	90057786		chr10	127054760	127054942
chr11	117974456	117977150		chr17	33949568	33956467		chr12	80517179	80520373		chr11	114419043	114419398		chr13	66431245	66432129		chr11	106986585	106988653		chr14	8286432	8287102		chr1	92626623	92626722		chr10	127256171	127256343
chr11	8568964	8570569		chr17	24250717	24252643		chr12	104470265	104476607		chr11	116368176	116368505		chr13	76497897	76498295		chr11	114668592	114674514		chr14	69161740	69162644		chr1	92919266	92919419		chr10	127703509	127703654
chr11	13005013	13007278		chr17	26252256	26253886		chr12	108001274	108006691		chr11	116885282	116885636		chr13	86713878	86714329		chr11	116020016	116022959		chr14	8005793	8006424		chr1	93538121	93538254		chr10	130280107	130280259
chr11	8634413	8636438		chr17	45565203	45574906		chr12	33954782	33960071		chr11	117358181	117358691		chr13	87172941	87173448		chr11	116671693	116674579		chr14	74065694	74066264		chr1	93571511	93571681		chr11	4076742	4076911
chr11	12466848	12468202		chr17	74526150	74529370		chr12	55597664	55601230		chr11	120776085	120776437		chr13	98328836	98329368		chr11	116675367	116678118		chr14	90910953	90911500		chr1	96482787	96482919		chr11	4461339	4461441
chr11	69580153	69582711		chr17	15019691	15025978		chr12	56610554	56613686		chr12	8547306	8547615		chr13	117296847	117297504		chr12	110687602	110693347		chr14	119286704	119287242		chr1	99673762	99673926		chr11	4750399	4750555
chr11	6894307	6896033		chr17	24413580	24415621		chr12	57534504	57551889		chr12	13214805	13215262		chr13	118149623	118150112		chr12	28626768	28631450		chr14	58658484	58659015		chr1	101793275	101793450		chr11	4763748	4763878
chr11	22829884	22831223		chr17	35240788	35243751		chr12	58211083	58214739		chr12	16717698	16717996		chr14	19415725	19419681		chr12	69155797	69157772		chr14	109675995	109676513		chr1	103241030	103241156		chr11	4949323	4949495
chr11	30748771	30751126		chr17	80205645	80207929		chr12	61522740	61525450		chr12	24462144	24462486		chr14	7592525	7592967		chr12	80950552	80955200		chr14	123451387	123451912		chr1	103661540	103661657		chr11	6016501	6016594
chr11	33536587	33538427		chr18	34930746	34932832		chr12	73038072	73049145		chr12	30597015	30597299		chr14	13640300	13641381		chr12	86481534	86491914		chr14	12537464	12537981		chr1	103752919	103753073		chr11	12025851	12026014
chr11	49805932	49806716		chr18	74999805	75006265		chr12	73583798	73586473		chr12	33280777	33281173		chr14	35432794	35433883		chr12	86505821	86516857		chr14	112518664	112519188		chr1	105071259	105071380		chr11	32718604	32718722
chr11	102329350	102330577		chr18	35552880	35564358		chr12	79130337	79132219		chr12	33379995	33380400		chr14	116232765	116233898		chr12	86519362	86524091		chr14	88479080	88479621		chr1	106058486	106058700		chr11	32889428	32889525
chr11	88689396	88690968		chr18	9957335	9958917		chr12	83484526	83489253		chr12	55499071	55499491		chr14	13693803	13694689		chr12	86524423	86527068		chr14	104715579	104716221		chr1	107538908	107539040		chr11	33680211	33680355
chr11	95309353	95312998		chr18	34623463	34625799		chr12	84068965	84070340		chr12	74013796	74014085		chr14	14047810	14048276		chr12	87427675	87429097		chr14	6637076	6637818		chr1	110793602	110793714		chr11	33787472	33787622
chr11	102820308	102821114		chr18	34952086	34956010		chr12	95691349	95696136		chr12	81788662	81789033		chr14	24382524	24383087		chr12	97061385	97061843		chr15	75085456	75087149		chr1	111751634	111751738		chr11	35798985	35799109
chr11	107434928	107436365		chr19	8818428	8821078		chr12	98573308	98576163		chr12	84249168	84249589		chr14	33648308	33648820		chr12	111538610	111543961		chr15	87967750	87968322		chr1	111756301	111756410		chr11	41999604	41999755
chr11	113708696	113711100		chr19	10603355	10607028		chr12	107915151	107917760		chr12	86795478	86796496		chr14	52763479	52763968		chr13	21778741	21780683		chr15	21656258	21656809		chr1	112019496	112019644		chr11	48696487	48696605
chr11	33533541	33535565		chr19	43674213	43676124		chr12	110186828	110190287		chr12	91400177	91400526		chr14	68681480	68682039		chr13	22035836	22037185		chr15	63626657	63627185		chr1	112650350	112650471		chr11	50892588	50892681
chr11	44746415	44747423		chr19	4808970	4812771		chr12	111484195	111486724		chr12	100201904	100202258		chr14	70728410	70728832		chr13	22040000	22041366		chr15	103943385	103943912		chr1	114143469	114143575		chr11	54303211	54303322
chr11	89067345	89068997		chr19	53389641	53392338		chr12	118840886	118851913		chr12	102181843	102182181		chr14	85524982	85525442		chr13	23554978	23556723		chr15	6316673	6317190		chr1	118881688	118881811		chr11	54696088	54696206
chr11	112959523	112960026		chr19	60789247	60791523		chr13	31556476	31560599		chr12	117764744	117765166		chr14	89583898	89584352		chr13	23584786	23585994		chr15	86194551	86195474		chr1	119125718	119125900		chr11	55607836	55608035
chr11	9115322	9116751		chr2	90744139	90746528		chr13	31618379	31631202		chr12	117993479	117993796		chr14	91279634	91280176		chr13	23621256	23622510		chr15	9015644	9016400		chr1	119377295	119377426		chr11	55682471	55682600
chr11	46068521	46069250		chr2	130273123	130281827		chr13	40702256	40712976		chr13	3406540	3407031		chr14	98756870	98757250		chr13	23738700	23740638		chr15	47539775	47540316		chr1	119582285	119582440		chr11	55810857	55811018
chr11	63270332	63272888		chr2	53190527	53192905		chr13	40727580	40740487		chr13	9846801	9847218		chr14	105933360	105933879		chr13	19523409	19526294		chr15	85541944	85542435		chr1	120515777	120515892		chr11	55897646	55897739
chr11	69701621	69705656		chr2	128966507	128968744		chr13	55824205	55837932		chr13	13516776	13517180		chr14	109964081	109964418		chr13	21716350	21717332		chr15	37202999	37203475		chr1	120518952	120519072		chr11	56812256	56812370
chr11	77892631	77894744		chr2	25220066	25226491		chr13	56249756	56254660		chr13	21928588	21928850		chr14	114209200	114209798		chr13	21735043	21736027		chr16	98107291	98107985		chr1	126973956	126974094		chr11	59584683	59584818
chr11	80131704	80132772		chr2	85036636	85038125		chr13	72627025	72632959		chr13	40977637	40977947		chr14	114668198	114668803		chr13	21749306	21750622		chr16	93788967	93789614		chr1	127219692	127219861		chr11	66259036	66259109
chr11	95980435	95982972		chr2	127792018	127794347		chr13	98501057	98506042		chr13	41134905	41135189		chr14	116465612	116466083		chr13	21752707	21753876		chr16	3115499	3116762		chr1	128768143	128768266		chr11	70043810	70043906
chr11	96189807	96190806		chr2	132251917	132253716		chr13	114455684	114460936		chr13	41571945	41572410		chr14	116513437	116513881		chr13	21808891	21810253		chr16	5708935	5709468		chr1	129029516	129029615		chr11	71389686	71389789
chr11	107352463	107353356		chr2	147010314	147013877		chr13	31804469	31812759		chr13	45030859	45031177		chr14	117291260	117291773		chr13	21811699	21812512		chr16	11143744	11144511		chr1	130353655	130353827		chr11	71937214	71937361
chr11	117887946	117890971		chr2	172369713	172371615		chr13	34650791	34654091		chr13	45976936	45977231		chr14	123432813	123433666		chr13	21832539	21833549		chr16	57390927	57391891		chr1	131139277	131139479		chr11	72113427	72113564
chr12	86500311	86505568		chr3	61362108	61365785		chr13	36730961	36736825		chr13	49173280	49173676		chr15	65462672	65463225		chr13	21833729	21834805		chr16	3349841	3350920		chr1	131514309	131514467		chr11	72494155	72494298
chr12	12936553	12944314		chr3	96268057	96270411		chr13	45962549	45966419		chr13	52982810	52983178		chr15	4857689	4858114		chr13	22034194	22035635		chr16	17222047	17222670		chr1	132265737	132265916		chr11	74585070	74585178
chr12	12787049	12789278		chr3	96327731	96329370		chr13	48657041	48670056		chr13	53109560	53109876		chr15	25052398	25052973		chr13	23544447	23545631		chr16	63312355	63312886		chr1	132919395	132919557		chr11	74619252	74619411
chr12	110471150	110474272		chr3	107331875	107334746		chr13	53461804	53466987		chr13	53426548	53426799		chr15	44724091	44724584		chr13	23561184	23562426		chr16	10974834	10975405		chr1	133019369	133019725		chr11	75173482	75173609
chr12	39997201	39999140		chr3	135437342	135440633		chr13	53474295	53476754		chr13	54799663	54800102		chr15	87294871	87295508		chr13	23571325	23573117		chr16	18532986	18533557		chr1	133020204	133020424		chr11	77980395	77980556
chr12	86497692	86499461		chr3	51483481	51484770		chr13	56220924	56224262		chr13	56197541	56197874		chr15	103655510	103656547		chr13	23574419	23575444		chr16	30829315	30829859		chr1	133095465	133095607		chr11	78952596	78952693
chr12	104763411	104765435		chr3	95817759	95820706		chr13	56255246	56260803		chr13	58287917	58288264		chr15	16456350	16456931		chr13	23575736	23577498		chr16	35981379	35981992		chr1	133193417	133193549		chr11	79593657	79593793
chr12	4356247	4360198		chr3	96237269	96241334		chr13	58806212	58809225		chr13	62856171	62856698		chr15	23958608	23959128		chr13	23684202	23684991		chr16	93597689	93598217		chr1	133213262	133213369		chr11	80312710	80312865
chr12	6595347	6596042		chr3	96244641	96248572		chr13	72623134	72626913		chr13	64447953	64448339		chr15	27388590	27389225		chr13	23743840	23745571		chr16	34742771	34743277		chr1	133664323	133664477		chr11	80332841	80332965
chr12	12803556	12804438		chr3	137863611	137865966		chr13	78207629	78211785		chr13	66715318	66715915		chr15	33816068	33816532		chr13	23746720	23747835		chr16	3114886	3115229		chr1	133671380	133671505		chr11	80613643	80613786
chr12	73085300	73088277		chr3	152209197	152211771		chr13	94868486	94878803		chr13	66991613	66991955		chr15	38479706	38480399		chr13	23763679	23765035		chr16	91534363	91534923		chr1	134101025	134101203		chr11	81115812	81115962
chr12	117683868	117684941		chr4	127020740	127023579		chr13	94879954	94886670		chr13	69553121	69553373		chr15	49323687	49324284		chr13	31682510	31683875		chr16	86820746	86821230		chr1	134533743	134533887		chr11	81966873	81967010
chr12	56296240	56297248		chr4	129334452	129336555		chr13	98352180	98360399		chr13	73310372	73310888		chr15	54210882	54211629		chr13	51202549	51203181		chr17	13550654	13553232		chr1	135108788	135108889		chr11	82313246	82313369
chr12	72732820	72735213		chr4	137047807	137049503		chr13	100550575	100553447		chr13	73718278	73718699		chr15	55684124	55684822		chr13	58387647	58391944		chr17	39842962	39848889		chr1	135129913	135130013		chr11	82596949	82597059
chr12	80116396	80117293		chr4	119292660	119295752		chr13	105052858	105055718		chr13	75797798	75798243		chr15	57900304	57900798		chr13	90924692	90928212		chr17	67741134	67741759		chr1	135759835	135759940		chr11	83421445	83421577
chr12	86930833	86933952		chr4	146066820	146068316		chr13	112986372	112990828		chr13	90840888	90841300		chr15	82596172	82596918		chr13	97253241	97253990		chr17	13305770	13306419		chr1	135994382	135994506		chr11	84662104	84662244
chr12	71296169	71297632		chr4	46388683	46390773		chr14	21981483	21995799		chr13	94560043	94560394		chr16	10187161	10187809		chr13	97487234	97507091		chr17	62737312	62737853		chr1	136678032	136678169		chr11	84729333	84729500
chr12	72649446	72650475		chr4	117152227	117157034		chr14	25457167	25462324		chr13	95563521	95564263		chr16	62876871	62877558		chr13	113723788	113726559		chr17	94886908	94887493		chr1	139195764	139195942		chr11	84944044	84944205
chr12	109947869	109950490		chr4	120824874	120826901		chr14	30351948	30354769		chr13	109547742	109548121		chr16	4748925	4749596		chr14	55059435	55063193		chr17	53152248	53152863		chr1	139494940	139495083		chr11	87254337	87254473
chr12	110836807	110838583		chr4	155600772	155602471		chr14	34817569	34823644		chr13	110368653	110369019		chr16	65179782	65180328		chr14	76505213	76508992		chr17	36231055	36231808		chr1	141244715	141244864		chr11	87921096	87921242
chr12	4897838	4898924		chr5	129786538	129788254		chr14	58069905	58077469		chr13	111771335	111771551		chr16	3384217	3385047		chr14	99315079	99316077		chr17	93645464	93645987		chr1	141255710	141255854		chr11	87957206	87957332
chr12	87317523	87319698		chr5	88553203	88555356		chr14	61680219	61686706		chr13	113035937	113036225		chr16	16507146	16508113		chr14	18266408	18269021		chr17	7616053	7616591		chr1	141991183	141991330		chr11	97078860	97079031
chr13	65990723	65991750		chr5	100424145	100430581		chr14	70074465	70082032		chr14	6037072	6037401		chr16	20042122	20042770		chr14	18269262	18271044		chr17	70963464	70964110		chr1	145016292	145016463		chr11	98324113	98324255
chr13	66710432	66712057		chr5	108059831	108067606		chr14	70887766	70892203		chr14	9393484	9393823		chr16	27423541	27424776		chr14	24490738	24491952		chr17	93046211	93046735		chr1	145109582	145109774		chr11	100203590	100203750
chr13	5696298	5698015		chr5	23431884	23436051		chr14	118229631	118238336		chr14	13356074	13356332		chr16	32580236	32581403		chr14	24492061	24501515		chr17	13654531	13655328		chr1	145112530	145112696		chr11	100758928	100759102
chr13	65626989	65628011		chr5	122371587	122374294		chr14	122472114	122484511		chr14	14098652	14098931		chr16	41200589	41201357		chr14	31010948	31012906		chr17	66799254	66799768		chr1	145877553	145877654		chr11	102393382	102393523
chr13	34109070	34110274		chr5	135167959	135169667		chr14	7244068	7245397		chr14	20067230	20067700		chr16	44044717	44045271		chr14	31015079	31016005		chr17	13590332	13590778		chr1	147062349	147062493		chr11	103210428	103210548
chr13	44703394	44708153		chr5	27790648	27792850		chr14	12338977	12348685		chr14	27096782	27097146		chr16	58207397	58207942		chr14	34345744	34346745		chr17	19658339	19658853		chr1	149950756	149950868		chr11	103656665	103656787
chr13	65491518	65492659		chr5	34335272	34337785		chr14	29720191	29723903		chr14	34401220	34401481		chr16	61369464	61370061		chr14	50924520	50928201		chr17	51324553	51325055		chr1	150081942	150082078		chr11	103920751	103920933
chr13	112462080	112463162		chr5	113770593	113773320		chr14	48661705	48671705		chr14	54227947	54228549		chr16	62664476	62665015		chr14	52067128	52069733		chr17	3081488	3082742		chr1	150088781	150088944		chr11	104053378	104053543
chr13	44721851	44723128		chr5	123930060	123931141		chr14	57744031	57746822		chr14	54714185	54714524		chr16	65789931	65790807		chr14	52069933	52074279		chr17	22876241	22877512		chr1	151440843	151440942		chr11	104114866	104114981
chr13	95532454	95536596		chr6	67265800	67270239		chr14	60377408	60380174		chr14	55822495	55822869		chr16	66243010	66243605		chr14	54641391	54642931		chr18	90601857	90602840		chr1	152832471	152832576		chr11	104198042	104198153
chr13	11005229	11006180		chr6	85450687	85453340		chr14	61686811	61690598		chr14	57060000	57060445		chr16	67630922	67631441		chr14	54898997	54899781		chr18	3004170	3006061		chr1	152992378	152992504		chr11	107817320	107817482
chr13	37436066	37437192		chr6	47594048	47596270		chr14	67229005	67238817		chr14	60771067	60771567		chr16	71790932	71791586		chr14	55064577	55066394		chr18	40307940	40308488		chr1	153116432	153116581		chr11	107920271	107920362
chr13	54215257	54217059		chr6	113074696	113079292		chr14	79767764	79774786		chr14	62492537	62492928		chr16	74777455	74777972		chr14	63488461	63491318		chr18	48010192	48010738		chr1	153367140	153367295		chr11	114652629	114652751
chr13	110018442	110020326		chr6	115675165	115677962		chr14	116924948	116928160		chr14	63891824	63892093		chr16	89167550	89168092		chr14	63501594	63502514		chr18	42913707	42914252		chr1	153508020	153508143		chr11	115052319	115052484
chr13	5549632	5551498		chr6	117906134	117911246		chr15	35292917	35304005		chr14	64049182	64049616		chr17	39843025	39847318		chr14	63503240	63503986		chr18	7033502	7034032		chr1	154843504	154843621		chr11	115091661	115091761
chr13	16829448	16831114		chr6	146641889	146643620		chr15	60821646	60825185		chr14	65982159	65982464		chr17	72616199	72616754		chr14	67012034	67013926		chr18	55939221	55939863		chr1	155056255	155056429		chr11	115336243	115336336
chr13	97281825	97283384		chr7	16613898	16616340		chr15	98775529	98779570		chr14	67211777	67212119		chr17	81244224	81245351		chr14	75846607	75851811		chr18	65103788	65104319		chr1	156400336	156400480		chr11	115814137	115814243
chr13	19630863	19631470		chr7	45119162	45130185		chr15	102931203	102944492		chr14	70181180	70181496		chr17	16759832	16760269		chr14	99316204	99316846		chr18	78198018	78198608		chr1	157039012	157039173		chr11	117873047	117873149
chr13	53233783	53235433		chr7	101904789	101906583		chr15	102948734	102987996		chr14	78668294	78668651		chr17	21035245	21036474		chr14	115043657	115050113		chr18	68691878	68692537		chr1	157451590	157451738		chr11	118540796	118540909
chr13	62077804	62079305		chr7	12921337	12928898		chr15	102988635	103017564		chr14	79106779	79107504		chr17	63762679	63763356		chr14	120948920	120950619		chr18	42975623	42976237		chr1	159557858	159557957		chr11	118555803	118555901
chr13	63530228	63531269		chr7	24883556	24893221		chr15	7808975	7816661		chr14	103132064	103132449		chr17	67833599	67834140		chr15	5118656	5123019		chr18	3006239	3006513		chr1	160203806	160203918		chr11	118584889	118585134
chr13	90868769	90869695		chr7	81339443	81346088		chr15	55905237	55908181		chr14	122060718	122061155		chr17	6324412	6324963		chr15	80075732	80083441		chr18	12948823	12949406		chr1	160266063	160266162		chr11	118603257	118603393
chr13	18485737	18486363		chr7	128460382	128462899		chr15	72544933	72549720		chr15	8589723	8590111		chr17	9786157	9786738		chr15	96686227	96689485		chr18	54698685	54699545		chr1	160275330	160275494		chr11	118659405	118659562
chr13	50459774	50460977		chr7	143548318	143550253		chr15	78717792	78719917		chr15	10708567	10708956		chr17	13158355	13159268		chr15	98929890	98932204		chr19	61331073	61331778		chr1	161316406	161316572		chr11	118685586	118685678
chr13	62181625	62183024		chr7	13022567	13036735		chr15	85575908	85583326		chr15	12084925	12085308		chr17	13420536	13420850		chr15	5116676	5118547		chr19	23357196	23357794		chr1	162295585	162295702		chr11	118906693	118906832
chr13	63979417	63981167		chr7	44815136	44820299		chr15	93594502	93596971		chr15	12586191	12586544		chr17	13551787	13553169		chr15	36593116	36593528		chr19	45649678	45650435		chr1	162616583	162616682		chr11	119492935	119493105
chr13	66625335	66626269		chr7	45717608	45722432		chr15	97999370	98005986		chr15	27234764	27235085		chr17	16130680	16131178		chr15	55876862	55879635		chr19	61199326	61200030		chr1	164010517	164010646		chr11	119775201	119775349
chr13	67844021	67845728		chr7	109517872	109526902		chr15	98789060	98794169		chr15	28181938	28182331		chr17	27354224	27354872		chr15	71795093	71795756		chr19	50310398	50310922		chr1	164249624	164249728		chr12	8099950	8100099
chr13	94706411	94707666		chr7	110058585	110062573		chr15	98804676	98808769		chr15	66033942	66034241		chr17	28937718	28938148		chr15	76904035	76908271		chr19	36703233	36703740		chr1	165657106	165657276		chr12	16653596	16653751
chr13	104910942	104912299		chr7	110121158	110123489		chr15	98893267	98896759		chr15	71917696	71917996		chr17	38047709	38048238		chr15	79525629	79529652		chr19	61266372	61267217		chr1	165896923	165897082		chr12	18467137	18467302
chr13	112770318	112771883		chr7	126501519	126504305		chr15	103033929	103036525		chr15	74692320	74692663		chr17	55114297	55115132		chr15	80255373	80259017		chr19	58481978	58482485		chr1	167097512	167097613		chr12	24425052	24425293
chr14	45444136	45446139		chr7	4804671	4815018		chr15	103085427	103087572		chr15	75679282	75679558		chr17	60783415	60784091		chr15	88708123	88710056		chr19	8252016	8252522		chr1	167269036	167269163		chr12	28831154	28831299
chr14	48700583	48701775		chr7	28808134	28813994		chr16	17796661	17800373		chr15	75727593	75727953		chr17	76756957	76757593		chr15	88862316	88867963		chr19	31944064	31944664		chr1	170203189	170203335		chr12	33338321	33338437
chr14	63497066	63502805		chr7	34167675	34169967		chr16	18580346	18592227		chr15	95725886	95726217		chr17	92295647	92296143		chr15	89371237	89373873		chr2	57629301	57629969		chr1	170427255	170427375		chr12	42972852	42973058
chr14	105858822	105860719		chr7	44302898	44306094		chr16	35540456	35543945		chr15	96665885	96666323		chr18	59730060	59731824		chr15	99037421	99039761		chr2	98663586	98664157		chr1	171473692	171473796		chr12	55122815	55122997
chr14	55085216	55086592		chr7	64391443	64393089		chr16	21693489	21695898		chr15	96936802	96937070		chr18	8012412	8013113		chr15	99707987	99708347		chr2	98666114	98667463		chr1	176719487	176719618		chr12	55197906	55198058
chr14	76515339	76516430		chr7	110017755	110019416		chr16	34571806	34575059		chr15	97327500	97327889		chr18	50633188	50633691		chr15	103240410	103241949		chr2	182012556	182013419		chr1	177766569	177766681		chr12	55272423	55272590
chr14	52065727	52067426		chr7	111121537	111123448		chr16	90829801	90831980		chr15	97663710	97664416		chr18	6866689	6867480		chr15	103242080	103244283		chr2	98662101	98663099		chr1	178340879	178340977		chr12	55600259	55600468
chr14	77518732	77520430		chr7	121033717	121035692		chr16	91269184	91272503		chr15	97667397	97667755		chr18	28445974	28446445		chr15	103244705	103249380		chr2	98664812	98665345		chr1	179141151	179141276		chr12	70347208	70347333
chr14	91655848	91656666		chr7	133636754	133638440		chr16	92695070	92700351		chr15	99416500	99416883		chr18	29020321	29020963		chr16	23107672	23115253		chr2	92093357	92094000		chr1	179717328	179717465		chr12	81206313	81206409
chr14	99338888	99341649		chr8	20422782	20425525		chr17	15374166	15379342		chr15	102742647	102742916		chr18	29194893	29196018		chr16	22237946	22245649		chr2	181917349	181918296		chr1	181015748	181015848		chr12	84698629	84698729
chr14	99038996	99039773		chr8	19784048	19785671		chr17	26836924	26846189		chr16	3122732	3123299		chr18	33029940	33030661		chr16	25522495	25527546		chr2	181918399	181918912		chr1	181857862	181857975		chr12	86189781	86189872
chr14	48653574	48655946		chr8	20121260	20123340		chr17	33998873	34000503		chr16	4316104	4316471		chr18	37365190	37366141		chr16	31325085	31327891		chr2	19509089	19509623		chr1	182233985	182234140		chr12	86213210	86213346
chr14	49818258	49820603		chr8	20296420	20298739		chr17	34957032	34959652		chr16	8869749	8870071		chr18	71082472	71083075		chr16	33056480	33058640		chr2	41895961	41896495		chr1	182338003	182338149		chr12	86547923	86548034
chr14	77249566	77251245		chr8	80737904	80740394		chr17	34969671	34972476		chr16	8883665	8884170		chr18	4700183	4700807		chr16	33058799	33062578		chr2	5378814	5379589		chr1	182946147	182946268		chr12	86983566	86983706
chr14	122415814	122417431		chr8	85033799	85038657		chr17	62878327	62884427		chr16	16584563	16585251		chr18	25258846	25259585		chr16	38522323	38523197		chr2	181930716	181931752		chr1	184028064	184028240		chr12	86984272	86984446
chr14	20215415	20218209		chr8	20549493	20552278		chr17	85606526	85627408		chr16	17583086	17583356		chr18	28444951	28445597		chr16	55968251	55974386		chr2	92167885	92168404		chr1	185076818	185076983		chr12	86994318	86994462
chr14	105860836	105861379		chr8	70891575	70898749		chr17	85682358	85693409		chr16	17938879	17939169		chr18	47771339	47771675		chr16	91656144	91660584		chr2	110293392	110293929		chr1	186762609	186762709		chr12	87040385	87040515
chr14	8403200	8404025		chr8	79710988	79712214		chr17	8432136	8436054		chr16	18443509	18443912		chr18	55316323	55316967		chr17	24220394	24224197		chr2	121522145	121523076		chr1	189184277	189184384		chr12	88709465	88709573
chr14	25590428	25592035		chr8	83714628	83716647		chr17	8798280	8803885		chr16	22807542	22807782		chr18	55317355	55317992		chr17	24721236	24723619		chr2	145002002	145002523		chr1	189844606	189844748		chr12	92040638	92040730
chr14	47572511	47573552		chr8	18845563	18847205		chr17	29885439	29890375		chr16	36817371	36817722		chr18	69040564	69041175		chr17	34109126	34116224		chr2	28183954	28184840		chr1	189849773	189849917		chr12	100268149	100268246
chr14	49447455	49448272		chr8	123040774	123046197		chr17	35438564	35439818		chr16	56920209	56920683		chr18	70493977	70494404		chr17	34948486	34952491		chr2	46225503	46226000		chr1	192883744	192883865		chr12	102550642	102550761
chr14	64408146	64408859		chr8	85070584	85072539		chr17	44733069	44739540		chr16	84879214	84879558		chr19	33440332	33440873		chr17	35832540	35837939		chr2	178786757	178787274		chr1	193221393	193221522		chr12	102555187	102555312
chr15	88707897	88710265		chr8	94385347	94387898		chr17	56510155	56512873		chr16	90167609	90168089		chr19	11222866	11223157		chr17	35916955	35920004		chr2	181929043	181929377		chr1	193550889	193551002		chr12	105266204	105266394
chr15	10722463	10724300		chr8	123099951	123106740		chr17	69968802	69971437		chr16	91935185	91935556		chr19	12152398	12153030		chr17	37009615	37013837		chr2	20899644	20900429		chr1	193578002	193578154		chr12	105322185	105322532
chr15	97593525	97594785		chr8	126944146	126946763		chr17	78198917	78202202		chr16	93938303	93938721		chr19	31722942	31724048		chr17	45565450	45573281		chr2	22744615	22745223		chr1	194373670	194373821		chr12	106115133	106115312
chr15	7115133	7117454		chr9	13826148	13828537		chr17	80372712	80374466		chr17	3451078	3451427		chr19	45186651	45187125		chr17	46772679	46775547		chr2	124003455	124003951		chr1	194995450	194995607		chr12	106633245	106633362
chr15	25753702	25756482		chr9	44332566	44338044		chr17	80943645	80946165		chr17	5429361	5429720		chr19	45700103	45700643		chr17	56613362	56617169		chr2	4515847	4516357		chr10	3835927	3836032		chr12	108994807	108994929
chr15	39780050	39782021		chr9	96477366	96480343		chr17	83213337	83217384		chr17	5795858	5796324		chr19	50112898	50113443		chr17	14992052	14992901		chr2	3049996	3050421		chr10	3934823	3934986		chr12	111756827	111756977
chr15	50899977	50901200		chr9	111270898	111272548		chr17	83629828	83632889		chr17	6386861	6387375		chr2	50769995	50770576		chr17	15020766	15023231		chr2	22588611	22590186		chr10	6578099	6578249		chr12	112141412	112141535
chr15	62958394	62959863		chr9	14783896	14785520		chr17	87795965	87799164		chr17	6392818	6393286		chr2	85695522	85696265		chr17	23610056	23612102		chr2	22743587	22743848		chr10	7474727	7474854		chr12	112511186	112511346
chr15	96244200	96245269		chr9	59290685	59292277		chr18	15061202	15067341		chr17	6553754	6554259		chr2	100546228	100547700		chr17	23814038	23822327		chr2	181928309	181928583		chr10	7482702	7482858		chr12	113188109	113188227
chr15	39728093	39729312		chr9	59655809	59677157		chr18	23038200	23042051		chr17	6559625	6560074		chr2	111179895	111180532		chr17	24240215	24240662		chr2	33933863	33934581		chr10	7919360	7919548		chr13	8316908	8317014
chr15	52967677	52968439		chr9	78471962	78482949		chr18	38208923	38213019		chr17	6697210	6697582		chr2	136869568	136870202		chr17	24528210	24532237		chr2	90394905	90395422		chr10	8558410	8558537		chr13	12889759	12889894
chr15	9452025	9453559		chr9	90112700	90115331		chr18	42393819	42396931		chr17	28048495	28048779		chr2	7586472	7587022		chr17	27563641	27566098		chr2	181930149	181930514		chr10	8832744	8832919		chr13	23990958	23991093
chr15	25769441	25770690		chr9	108565691	108568973		chr18	47365226	47371564		chr17	28761924	28762234		chr2	14376297	14376884		chr17	27629133	27635256		chr3	159939200	159939902		chr10	8852087	8852201		chr13	25269148	25269312
chr15	77354587	77357437						chr18	53460539	53475149		chr17	30559279	30559957		chr2	22074223	22074727		chr17	28328331	28332698		chr3	8245235	8246682		chr10	11465504	11465604		chr13	42711659	42711782
chr15	88865767	88868968						chr18	64335480	64347270		chr17	35996984	35997433		chr2	30219471	30220030		chr17	29038326	29041392		chr3	149052321	149053178		chr10	11470998	11471109		chr13	46097089	46097223
chr15	103518051	103520468						chr18	75819136	75822331		chr17	37203590	37204006		chr2	35520534	35521055		chr17	29041620	29049414		chr3	21698223	21698779		chr10	11684131	11684242		chr13	52518475	52518575
chr15	25761640	25763802						chr18	9210982	9215473		chr17	43606694	43607117		chr2	50680501	50681102		chr17	31842426	31844061		chr3	5860225	5861008		chr10	13990969	13991086		chr13	53948166	53948313
chr15	52012611	52014308						chr18	11047356	11056987		chr17	47511187	47511612		chr2	66846198	66846683		chr17	32063676	32064771		chr3	56575225	56575951		chr10	17317296	17317472		chr13	54371684	54371820
chr15	62092525	62093287						chr18	21651365	21654878		chr17	48100933	48101503		chr2	75232645	75232974		chr17	33819660	33824632		chr3	128209815	128210360		chr10	17324466	17324632		chr13	54750795	54750994
chr15	85865737	85866604						chr18	35651869	35655469		chr17	52649191	52649590		chr2	82674680	82675352		chr17	33949586	33955645		chr3	87424904	87425460		chr10	17481601	17481723		chr13	54876670	54876832
chr16	13747217	13751095						chr18	37730938	37733949		chr17	56553014	56553349		chr2	83580600	83580862		chr17	34116491	34121063		chr3	59919918	59920434		chr10	17797842	17798002		chr13	54945441	54945615
chr16	84768927	84770590						chr18	64331216	64335214		chr17	79840863	79841198		chr2	83581628	83582213		chr17	35144717	35149056		chr3	128936502	128937021		chr10	19183043	19183205		chr13	54970985	54971140
chr16	10216310	10217557						chr18	76843294	76845289		chr17	83025330	83025737		chr2	85084385	85084920		chr17	35252004	35255614		chr3	6115867	6116454		chr10	19900307	19900403		chr13	55419287	55419400
chr16	31890748	31891532						chr18	76854648	76861834		chr17	85189519	85189910		chr2	85299856	85300350		chr17	46242351	46245833		chr3	96044426	96045183		chr10	22220758	22220874		chr13	55576110	55576207
chr16	84778499	84780632						chr18	78046638	78049436		chr17	87044462	87044729		chr2	90179411	90179946		chr17	70842646	70844145		chr3	100316244	100316758		chr10	22410979	22411119		chr13	56895527	56895683
chr16	16864771	16866907						chr18	80706556	80715252		chr17	87571357	87571936		chr2	90366686	90367354		chr17	80199057	80207292		chr3	60044986	60046095		chr10	24262960	24263071		chr13	57867683	57867818
chr16	22402399	22404380						chr18	84719365	84722153		chr18	16211488	16212186		chr2	93830362	93830820		chr17	87984528	87987082		chr3	83123885	83124406		chr10	25895651	25895769		chr13	58663459	58663583
chr16	42781114	42782818						chr19	6497303	6499653		chr18	25061453	25061839		chr2	96196935	96197527		chr18	38586398	38587910		chr3	100485125	100485634		chr10	25903633	25903763		chr13	69674341	69674469
chr16	76321466	76322114						chr19	17835262	17838637		chr18	36122298	36122622		chr2	120638491	120638807		chr18	33794600	33798911		chr3	62158864	62159569		chr10	26492098	26492234		chr13	69896686	69896780
chr16	90164946	90166487						chr19	25605644	25613126		chr18	37761392	37761932		chr2	124800025	124800491		chr18	34935016	34938159		chr3	99980922	99981544		chr10	26582447	26582597		chr13	72806047	72806143
chr16	25516373	25518195						chr19	25669656	25675211		chr18	37852103	37852493		chr2	131647439	131647895		chr18	35553422	35563665		chr3	121249577	121250147		chr10	26927227	26927369		chr13	72902704	72902827
chr16	35587640	35589339						chr19	43598869	43602813		chr18	37883408	37883921		chr2	138578887	138579405		chr18	35595292	35598031		chr3	122308302	122308851		chr10	26935184	26935357		chr13	78171343	78171447
chr17	35503447	35508340						chr19	43605182	43618132		chr18	75599725	75600188		chr2	138834587	138835207		chr18	35598147	35599059		chr4	153152838	153153445		chr10	27366019	27366148		chr13	94878442	94878572
chr17	66457128	66457781						chr19	45227670	45238269		chr18	77316872	77317391		chr2	142309786	142310463		chr18	46611385	46613031		chr4	70377884	70378489		chr10	28061668	28061778		chr13	99900558	99900724
chr17	70827526	70831250						chr19	26603466	26608823		chr18	80118621	80119200		chr2	146135882	146136433		chr18	60725345	60726767		chr4	31353960	31354492		chr10	31867840	31867979		chr13	100210658	100210844
chr17	66478634	66481908						chr19	27216038	27219266		chr19	5529332	5529678		chr2	174295728	174296238		chr18	61590073	61596841		chr4	25472030	25472571		chr10	33892011	33892174		chr13	105442714	105442864
chr17	70864425	70867104						chr19	28677780	28681037		chr19	6652860	6653254		chr2	182012704	182013268		chr18	75395755	75397088		chr4	118547047	118548880		chr10	34387171	34387335		chr13	109116190	109116295
chr17	46811225	46812928						chr19	31762189	31765295		chr19	10333511	10333910		chr3	144489908	144491423		chr19	5793842	5802796		chr4	3089454	3091230		chr10	35019113	35019251		chr14	20093623	20093769
chr17	29450652	29452234						chr19	37695806	37700201		chr19	13812787	13813141		chr3	59802459	59803173		chr19	4760711	4763162		chr4	28176700	28177338		chr10	35224174	35224301		chr14	27596407	27596543
chr17	31807666	31809747						chr19	44510746	44512833		chr19	21747308	21747703		chr3	155771678	155772433		chr19	5840461	5845532		chr4	64497504	64498310		chr10	38240485	38240614		chr14	29657135	29657303
chr17	17738204	17740675						chr19	44740897	44762321		chr19	25445056	25445411		chr3	5435521	5436616		chr19	8705345	8707266		chr4	99381234	99381786		chr10	38319448	38319615		chr14	32321858	32321985
chr17	37078791	37080627						chr19	45075844	45077704		chr19	43630850	43631317		chr3	17733577	17734182		chr19	8712632	8713898		chr4	93844178	93844728		chr10	39126100	39126232		chr14	32467715	32467872
chr17	45454187	45459739						chr19	45149496	45157266		chr19	44363403	44363954		chr3	19094730	19095370		chr19	8723299	8728228		chr4	31180680	31181189		chr10	39222072	39222249		chr14	32597333	32597458
chr17	47570951	47572696						chr19	54044518	54048489		chr19	46014603	46014897		chr3	45261588	45262730		chr19	8886188	8888817		chr4	88640895	88641398		chr10	39456390	39456544		chr14	34816365	34816506
chr17	87972903	87975956						chr19	56873451	56875513		chr2	11059654	11060022		chr3	74457933	74458562		chr19	8978145	8983167		chr4	90726314	90726812		chr10	40531644	40531812		chr14	34867379	34867525
chr17	36993639	36996059						chr19	59456253	59464235		chr2	11331474	11331863		chr3	79769652	79770162		chr19	23169001	23170252		chr4	34935696	34935924		chr10	41940101	41940259		chr14	37016025	37016165
chr17	84351050	84351892						chr2	18686526	18701123		chr2	14295400	14295757		chr3	86334902	86336258		chr19	38973580	38974558		chr4	45193290	45193930		chr10	42475043	42475206		chr14	37068648	37068790
chr17	45599329	45602481						chr2	19443776	19448814		chr2	21261654	21261937		chr3	90995230	90995872		chr19	60757769	60760602		chr5	147611211	147611849		chr10	43411952	43412051		chr14	49525241	49525378
chr17	53561075	53562256						chr2	22620522	22625542		chr2	29817767	29818235		chr3	142518174	142518858		chr2	25220392	25224749		chr5	151734333	151734923		chr10	44135512	44135626		chr14	55027287	55027380
chr17	70900541	70901160						chr2	31634187	31642851		chr2	29859059	29859397		chr3	4723905	4724427		chr2	26632905	26640257		chr5	146666392	146666929		chr10	45817537	45817712		chr14	63489409	63489506
chr17	89933975	89934669						chr2	33628618	33645672		chr2	32133951	32134389		chr3	12468695	12469503		chr2	75666181	75671585		chr5	146260781	146261549		chr10	46785778	46785933		chr14	63523253	63523356
chr17	10365943	10367651						chr2	38336289	38341886		chr2	32689484	32689728		chr3	20688077	20688707		chr2	130279111	130280843		chr5	80500610	80501190		chr10	46911904	46912006		chr14	63681574	63681833
chr17	27038057	27042038						chr2	38344499	38360133		chr2	32912496	32912777		chr3	25222889	25223206		chr2	163083552	163088937		chr5	93289398	93289940		chr10	49048783	49048972		chr14	63713135	63713377
chr17	36972170	36975041						chr2	57108410	57117482		chr2	39373097	39373477		chr3	28068277	28068924		chr2	165816387	165827687		chr5	106176552	106177080		chr10	49530601	49530750		chr14	63758515	63758644
chr17	45606676	45607899						chr2	61810481	61816453		chr2	69428138	69428497		chr3	30029838	30030169		chr2	167063067	167067776		chr5	46435522	46436061		chr10	51331610	51331783		chr14	64546923	64547068
chr17	70747559	70748872						chr2	70470830	70478990		chr2	75590176	75590566		chr3	34852002	34852476		chr2	180257312	180261442		chr5	110074250	110074777		chr10	51815723	51815818		chr14	64568661	64568849
chr17	88346673	88347588						chr2	70560764	70569112		chr2	75985150	75985507		chr3	64658597	64659051		chr2	180677574	180680858		chr5	114922210	114922764		chr10	53490306	53490479		chr14	65058961	65059072
chr18	84933579	84935211						chr2	71526160	71537290		chr2	77341906	77342442		chr3	68725577	68726061		chr2	22589161	22590236		chr5	144231522	144232029		chr10	53498300	53498436		chr14	66161475	66161576
chr18	13711903	13713224						chr2	71537403	71547662		chr2	90474760	90475205		chr3	74835236	74835900		chr2	26910830	26914990		chr5	36630201	36630877		chr10	55333875	55333993		chr14	66528248	66528379
chr18	36252035	36256137						chr2	74673861	74686011		chr2	91480906	91481206		chr3	82972730	82973055		chr2	30072469	30075510		chr5	113233210	113233736		chr10	59795238	59795415		chr14	66909845	66909963
chr18	75464687	75465866						chr2	74686208	74701589		chr2	94002307	94002709		chr3	82973528	82974161		chr2	30822253	30824652		chr5	130958001	130958529		chr10	59902040	59902151		chr14	68125646	68125814
chr18	77037524	77038951						chr2	74702184	74708045		chr2	109904168	109904543		chr3	114864173	114864966		chr2	32961675	32967162		chr5	4053717	4054438		chr10	59948467	59948567		chr14	75366875	75367053
chr18	35042792	35043901						chr2	74722536	74729407		chr2	134673588	134674009		chr3	120104886	120105451		chr2	38999609	39002372		chr5	36660757	36661576		chr10	61588997	61589102		chr14	79769780	79769927
chr18	69781354	69783028						chr2	74744172	74754358		chr2	136149058	136149363		chr3	128696612	128697093		chr2	52131087	52133283		chr5	60847893	60848411		chr10	61589140	61589414		chr14	79785537	79785648
chr18	14592008	14592916						chr2	80445314	80448733		chr2	148902138	148902728		chr3	145110287	145110620		chr2	71347966	71356379		chr6	103648825	103649536		chr10	62893598	62893702		chr14	80215974	80216106
chr18	24868562	24869472						chr2	84885349	84888609		chr2	163401257	163401589		chr3	149052434	149052989		chr2	71356700	71359794		chr6	4923550	4924419		chr10	65034988	65035136		chr14	80257235	80257352
chr18	30120616	30123245						chr2	116060089	116067511		chr2	167072051	167072382		chr4	73294493	73296106		chr2	75659317	75661871		chr6	3200573	3201809		chr10	66410953	66411095		chr14	103536475	103536588
chr18	36414919	36416298						chr2	118744168	118747804		chr2	172999686	172999968		chr4	7100544	7101143		chr2	103760476	103763570		chr6	29747692	29749164		chr10	66989859	66990023		chr14	104430933	104431053
chr18	80183362	80185375						chr2	119320452	119328253		chr2	180251219	180251612		chr4	143645944	143646760		chr2	119353470	119356197		chr6	56233442	56233980		chr10	67299330	67299498		chr15	25118097	25118204
chr18	82775948	82778667						chr2	131560309	131563636		chr2	181392498	181392968		chr4	12934173	12934847		chr2	130274418	130278994		chr6	149586225	149586786		chr10	68446853	68447000		chr15	26309825	26309932
chr18	5011427	5012724						chr2	146217202	146224588		chr3	9076639	9077127		chr4	30929494	30930216		chr2	143943206	143947133		chr6	49236250	49236840		chr10	69422835	69422947		chr15	27747649	27747735
chr18	33834846	33836555						chr2	147180645	147192264		chr3	9947689	9948072		chr4	71509553	71510329		chr2	144246938	144252121		chr6	51047240	51047764		chr10	70028033	70028153		chr15	30913476	30913623
chr18	61627861	61629283						chr2	147360436	147368794		chr3	14381626	14382143		chr4	108284960	108285577		chr2	144252301	144270834		chr6	133169733	133170252		chr10	70324667	70324843		chr15	30925953	30926070
chr19	23132845	23137700						chr2	148036732	148049615		chr3	27982498	27982837		chr4	135185416	135185982		chr2	154869579	154874710		chr6	145932543	145933216		chr10	70698295	70698440		chr15	34837399	34837518
chr19	25486479	25489817						chr2	165232678	165235715		chr3	32188544	32188846		chr4	144841708	144842252		chr2	156145278	156147992		chr6	60687058	60687546		chr10	74513911	74514061		chr15	39199331	39199363
chr19	47449860	47451284						chr2	172545554	172552243		chr3	33956309	33956644		chr4	5190182	5190773		chr2	156176087	156178584		chr6	68011700	68012209		chr10	74935367	74935500		chr15	62297270	62297364
chr19	11298594	11300082						chr2	174326673	174330931		chr3	35693052	35693648		chr4	9723030	9723726		chr2	158352288	158354599		chr6	146531080	146531586		chr10	76447278	76447440		chr15	72568619	72568842
chr19	14834455	14836958						chr2	180889270	180895094		chr3	61467253	61467495		chr4	16545299	16545958		chr2	162931990	162941063		chr6	47777997	47778534		chr10	76459838	76459968		chr15	72637667	72637790
chr19	23086536	23090806						chr2	9872518	9892464		chr3	79586826	79587117		chr4	17409003	17409710		chr2	163072266	163078447		chr6	48121127	48121562		chr10	76480982	76481153		chr15	72689904	72690072
chr19	5841364	5850574						chr2	17729669	17732288		chr3	84352724	84352980		chr4	18606904	18608184		chr2	168178467	168180068		chr6	44792743	44793475		chr10	76786116	76786247		chr15	74076058	74076248
chr19	44265836	44267539						chr2	18673480	18684178		chr3	87089971	87090308		chr4	20503872	20504308		chr2	168181496	168184802		chr6	73519841	73520372		chr10	76927100	76927220		chr15	74382670	74382807
chr19	4810022	4812313						chr2	18799482	18801989		chr3	87508257	87508542		chr4	34506974	34507687		chr2	168746591	168748308		chr7	145340750	145341654		chr10	77168086	77168199		chr15	74659105	74659212
chr19	3841368	3843150						chr2	25289339	25292580		chr3	94502228	94502544		chr4	58391633	58392459		chr2	180659184	180662043		chr7	34957920	34958459		chr10	77202022	77202222		chr15	76522182	76522335
chr19	42321692	42323252						chr2	29249721	29253929		chr3	101318173	101318497		chr4	61409463	61409828		chr3	95658693	95665621		chr7	19033319	19033923		chr10	79222354	79222491		chr15	76722275	76722432
chr19	7582934	7584423						chr2	31844800	31847422		chr3	103169819	103170186		chr4	88376267	88377613		chr3	96237303	96240376		chr7	26779703	26780262		chr10	81487952	81488066		chr15	78066611	78066753
chr19	17137538	17139460						chr2	36101387	36106868		chr3	130887991	130888234		chr4	88731968	88732372		chr3	96245488	96248377		chr7	86806364	86806877		chr10	82051369	82051502		chr15	78119784	78120053
chr19	23093204	23096184						chr2	45107151	45113272		chr3	135731298	135731714		chr4	91973435	91973989		chr3	41611055	41614978		chr7	130834209	130834827		chr10	82100159	82100323		chr15	78153216	78153316
chr19	28182360	28183335						chr2	52674111	52677192		chr3	137991208	137991587		chr4	96947689	96948258		chr3	53106835	53113314		chr7	12010327	12017909		chr10	82798600	82798826		chr15	78713122	78713257
chr19	32254661	32256242						chr2	57101364	57105160		chr3	146177675	146178207		chr4	106395787	106396415		chr3	69035370	69036873		chr7	138593273	138593779		chr10	82844133	82844256		chr15	79791638	79791759
chr2	166156940	166158421						chr2	61655012	61657957		chr4	3780446	3780788		chr4	121254409	121254911		chr3	86134577	86138446		chr8	83756557	83757196		chr10	83056527	83056675		chr15	80203499	80203628
chr2	20665310	20673670						chr2	68469690	68473437		chr4	3967594	3967868		chr4	123776282	123776943		chr3	90209596	90213633		chr8	129300894	129301463		chr10	84640678	84640790		chr15	80277763	80277905
chr2	52070431	52073690						chr2	73269655	73282016		chr4	61555960	61556277		chr5	13862191	13863215		chr3	96269679	96270410		chr8	71432862	71433400		chr10	85658681	85658840		chr15	82080018	82080146
chr2	71866484	71868666						chr2	74663200	74673222		chr4	82933582	82934215		chr5	59184007	59185142		chr3	96557725	96562845		chr8	35134680	35135233		chr10	86186056	86186220		chr15	82921211	82921374
chr2	149982344	149983942						chr2	74708181	74715526		chr4	88696486	88696876		chr5	62868858	62869589		chr3	123505214	123508387		chr8	114436744	114437274		chr10	86676205	86676361		chr15	83879970	83880123
chr2	20652839	20656144						chr2	74730553	74741522		chr4	101860919	101861314		chr5	102408840	102410085		chr3	130725480	130726872		chr8	23095295	23096028		chr10	86684185	86684351		chr15	83924772	83924906
chr2	154425634	154428940						chr2	76405365	76408510		chr4	104911707	104912029		chr5	27364712	27365224		chr3	137866903	137867982		chr8	73319412	73319948		chr10	88625530	88625655		chr15	84086446	84086624
chr2	163051184	163053324						chr2	93641326	93648244		chr4	105151880	105152352		chr5	38406648	38407282		chr3	149052495	149052941		chr8	15519601	15520349		chr10	89330077	89330202		chr15	84109031	84109150
chr2	180708361	180712025						chr2	102449672	102451978		chr4	106874423	106874871		chr5	39230370	39230975		chr3	153905401	153913033		chr8	123961255	123961789		chr10	89331539	89331660		chr15	84829473	84829719
chr2	17988705	17989648						chr2	105124922	105129232		chr4	107164022	107164346		chr5	59125046	59125766		chr4	132308654	132312553		chr8	14306715	14307570		chr10	91405174	91405302		chr15	84965690	84965869
chr2	119463048	119465112						chr2	105666264	105678151		chr4	116719427	116719729		chr5	76223438	76224182		chr4	132348932	132353763		chr8	88587128	88587643		chr10	91418625	91418948		chr15	85465317	85465460
chr2	157418030	157419214						chr2	105678423	105686316		chr4	119390372	119390729		chr5	142068876	142069390		chr4	3828344	3835674		chr8	19783913	19785640		chr10	93820804	93820966		chr15	86544261	86544375
chr2	163031293	163033023						chr2	118700130	118706248		chr4	120230347	120230634		chr5	14552356	14552830		chr4	12234663	12237994		chr8	3754176	3754932		chr10	95437629	95437735		chr15	88325259	88325414
chr2	165981032	165982231						chr2	119741388	119744595		chr4	122910681	122910910		chr5	19649453	19649741		chr4	46472855	46475462		chr8	17290410	17290922		chr10	96243438	96243558		chr15	89150185	89150278
chr2	172576807	172577974						chr2	130294587	130297128		chr4	128957139	128957567		chr5	21240931	21241590		chr4	86577232	86578303		chr8	62054541	62055350		chr10	97562209	97562372		chr15	89453400	89453561
chr2	181917302	181919331						chr2	133551683	133555687		chr4	133005261	133005643		chr5	39720762	39721269		chr4	86851347	86854654		chr8	20121676	20123325		chr10	98252749	98252910		chr15	95526097	95526243
chr2	30778975	30779958						chr2	158608989	158616486		chr4	136369742	136370116		chr5	43834219	43834995		chr4	98736836	98741539		chr8	125778962	125779268		chr10	99854387	99854567		chr15	99176866	99176977
chr2	58624955	58627044						chr2	160360301	160371637		chr4	136678438	136678883		chr5	47758074	47758569		chr4	116699959	116701925		chr9	2999940	3038412		chr10	99937237	99937416		chr15	100469089	100469203
chr2	70278463	70279425						chr2	163375198	163376714		chr4	137443552	137444050		chr5	64894769	64895365		chr4	117147571	117152038		chr9	35305002	35305820		chr10	100190684	100190865		chr15	101258258	101258367
chr2	157840505	157842080						chr2	172938243	172940917		chr4	138282858	138283171		chr5	71525772	71526572		chr4	117152169	117156174		chr9	24541767	24542391		chr10	100567808	100567982		chr15	101473060	101473203
chr2	164823890	164824500						chr2	174297162	174301032		chr4	142005345	142005664		chr5	73986676	73987253		chr4	119130552	119139923		chr9	27212922	27213497		chr10	106181959	106182087		chr15	102335408	102335514
chr2	165809293	165812098						chr2	180774589	180777886		chr4	145653283	145653736		chr5	85074974	85075566		chr4	119274120	119277305		chr9	124256301	124258049		chr10	108186890	108187001		chr16	5765295	5765411
chr2	32161854	32163431						chr3	30505497	30516592		chr4	145851163	145851891		chr5	105043693	105043995		chr4	125116728	125118503		chr9	95425694	95426261		chr10	109044416	109044535		chr16	7740541	7740692
chr2	75873866	75874511						chr3	52100878	52105241		chr4	146483249	146484069		chr5	138046064	138046646		chr4	127021949	127024023		chr9	96852868	96853422		chr10	109130989	109131125		chr16	8717908	8718000
chr2	115723060	115724571						chr3	127629561	127636226		chr4	146812537	146812797		chr5	146542971	146543550		chr4	127025003	127030173		chr9	115350599	115351161		chr10	109560591	109560793		chr16	8914329	8914455
chr2	153167803	153168962						chr3	131105050	131114082		chr4	147201658	147202278		chr5	151530218	151530810		chr4	127030303	127036076		chr9	56223404	56224136		chr10	110911391	110911694		chr16	9836660	9836797
chr2	165967637	165970584						chr3	9250524	9253124		chr4	147345699	147346006		chr6	105662994	105664031		chr4	127036182	127040065		chr9	123461590	123462411		chr10	111768037	111768180		chr16	10501928	10502078
chr2	172515916	172517275						chr3	17784985	17789742		chr4	147658218	147658470		chr6	18988294	18989226		chr4	129216399	129223677		chr9	83558984	83559488		chr10	111875296	111875458		chr16	23890266	23890428
chr3	34759105	34761819						chr3	18051363	18056959		chr4	149958537	149959006		chr6	60312278	60313396		chr4	132490622	132492694		chr9	90302101	90302617		chr10	112962409	112962538		chr16	30300009	30300124
chr3	88569481	88574451						chr3	45375684	45382638		chr4	155249130	155249596		chr6	130955569	130956182		chr4	133082176	133083152		chr9	61722249	61722763		chr10	113593462	113593606		chr16	35302501	35302654
chr3	135545912	135547760						chr3	55779910	55785142		chr5	15507060	15507601		chr6	14460914	14461551		chr4	133962300	133964821		chr9	110281047	110281599		chr10	114119957	114120089		chr16	35302967	35303136
chr3	34754690	34758670						chr3	99238306	99243432		chr5	21326473	21326902		chr6	31852864	31853352		chr4	136047989	136053375		chr9	123924373	123924776		chr10	114260441	114260648		chr16	36628737	36628828
chr3	65656537	65659846						chr3	99247624	99250558		chr5	21658647	21658964		chr6	93376169	93377124		chr4	141320777	141323278		chr9	47958111	47958611		chr10	115196034	115196163		chr16	36887635	36887793
chr3	75649995	75652745						chr3	99251025	99258832		chr5	24530081	24530404		chr6	100757137	100758180		chr4	141328332	141330743		chr9	105819102	105819752		chr10	117717680	117717836		chr16	43753883	43754013
chr3	11210873	11214461						chr3	104960123	104963178		chr5	37109367	37109818		chr6	122915287	122915918		chr4	145545134	145546398		chr9	3258598	3259145		chr10	120091581	120091698		chr16	62758420	62758641
chr3	30724014	30725323						chr3	105450732	105454203		chr5	64070083	64070394		chr6	8927579	8928236		chr4	148609557	148612335		chr9	113261215	113261715		chr10	122843955	122844638		chr16	91011530	91011650
chr3	103207417	103208652						chr3	129199041	129206430		chr5	65401637	65402027		chr6	13571468	13571866		chr4	148623242	148624366		chr9	118674515	118675339		chr10	125211416	125211568		chr16	94995671	94995776
chr3	18256442	18257154						chr3	129213548	129221591		chr5	68012605	68013009		chr6	35346657	35347368		chr4	148625726	148626794		chr9	123872922	123873274		chr10	126599429	126599551		chr16	95057721	95057853
chr3	68564868	68566056						chr3	129222444	129226377		chr5	76565340	76565652		chr6	38281523	38282060		chr4	150246398	150252175		chrX	170757970	170758715		chr10	127219745	127219890		chr16	95093847	95094024
chr3	133532212	133534923						chr3	148987211	148991312		chr5	90951553	90951905		chr6	44691375	44691823		chr5	31198844	31200784		chrX	170880730	170881505		chr10	127590941	127591070		chr16	97286863	97286997
chr3	64264849	64266281						chr3	154326526	154334820		chr5	103654172	103654569		chr6	44692277	44692879		chr5	64829471	64831583		chrX	143482761	143483359		chr10	127961975	127962138		chr17	6256479	6256637
chr3	153675764	153676442						chr3	158560094	158563141		chr5	103817759	103818031		chr6	47672090	47673698		chr5	125382717	125389769		chrX	129056327	129056892		chr10	128104633	128104786		chr17	6321905	6322034
chr3	3666335	3668313						chr4	9842552	9848323		chr5	114667581	114667861		chr6	47685067	47686964		chr5	142899059	142906744		chrX	170672693	170673697		chr10	129848839	129849024		chr17	6490696	6490854
chr3	9641693	9642664						chr4	13742322	13745883		chr5	115358847	115359182		chr6	47752624	47754454		chr5	31153970	31154809		chrX	76598550	76599358		chr11	3189894	3190026		chr17	7741113	7741251
chr3	14999599	15001202						chr4	21677083	21681636		chr5	123377523	123377857		chr6	47757711	47759009		chr5	31201052	31202646		chrX	134149838	134150578		chr11	3282282	3282437		chr17	10135259	10135357
chr3	22121652	22122294						chr4	22482845	22499812		chr5	128499083	128499401		chr6	49617052	49617489		chr5	32621320	32621701		chrX	141276318	141276858		chr11	5797893	5798000		chr17	15179681	15179821
chr3	133524123	133525446						chr4	48043354	48053014		chr5	131430160	131430515		chr6	50635668	50636616		chr5	33482364	33482741		chrX	170004084	170004786		chr11	6367117	6367266		chr17	21801543	21801729
chr3	137779568	137780829						chr4	109656143	109660449		chr5	131492590	131492926		chr6	58069532	58070037		chr5	65386310	65391412		chrX	170018544	170022624		chr11	6377464	6377621		chr17	22230848	22231069
chr3	8245207	8246657						chr4	115934865	115941288		chr5	134494314	134494654		chr6	73213634	73214477		chr5	74093047	74096590		chrX	114463348	114463856		chr11	6527135	6527282		chr17	25239712	25239829
chr3	53650052	53650939						chr4	120745708	120749015		chr5	136790817	136791272		chr6	81855455	81855891		chr5	92050657	92051886		chrX	112370694	112371330		chr11	8012157	8012326		chr17	25400564	25400670
chr3	54989816	54990639						chr4	124656133	124660979		chr5	139717792	139718111		chr6	82161979	82162329		chr5	100031992	100039059		chrX	169985647	169990722		chr11	9442828	9443010		chr17	25813628	25813812
chr3	88574620	88577280						chr4	139819527	139836615		chr5	140619133	140619799		chr6	102578540	102579178		chr5	107906717	107910858		chrX	170009316	170018263		chr11	9450834	9450996		chr17	27228672	27228805
chr3	89798982	89801230						chr4	143349270	143351415		chr5	144514759	144515135		chr6	123359911	123360625		chr5	115563508	115565235						chr11	10102511	10102645		chr17	27466750	27466934
chr3	95650120	95654495						chr4	9858681	9860560		chr6	3447326	3447760		chr6	123678443	123679032		chr5	121204551	121207188						chr11	11033333	11033459		chr17	27724428	27724590
chr3	101163235	101164371						chr4	21683779	21691052		chr6	29762579	29762837		chr7	6590974	6591725		chr5	121208973	121210184						chr11	11828766	11828904		chr17	28575585	28575685
chr3	103145276	103146998						chr4	22477012	22481993		chr6	31033054	31033401		chr7	75811421	75812313		chr5	121210302	121212640						chr11	13659607	13659738		chr17	28580500	28580614
chr3	22156014	22156988						chr4	28812513	28816527		chr6	38911153	38911537		chr7	14087182	14088295		chr5	129022456	129024277						chr11	16804185	16804321		chr17	29362141	29362243
chr3	34007507	34008087						chr4	36949675	36953521		chr6	48817824	48818146		chr7	23557531	23558054		chr5	129024402	129027791						chr11	16841345	16841494		chr17	33972716	33972890
chr3	68491844	68494692						chr4	41497181	41500113		chr6	50294095	50294462		chr7	24582499	24583122		chr5	129846242	129847395						chr11	17183241	17183424		chr17	35064188	35064335
chr3	84181268	84182282						chr4	44709829	44715478		chr6	50526716	50527048		chr7	37042748	37043566		chr5	138163080	138168631						chr11	20139478	20139626		chr17	35270063	35270218
chr3	129551651	129552721						chr4	46341743	46348806		chr6	50937167	50937468		chr7	40131759	40132319		chr5	146833128	146835852						chr11	20164947	20165140		chr17	39107238	39107527
chr3	144412551	144414290						chr4	46989773	46993227		chr6	52036078	52036445		chr7	59691537	59692121		chr5	146835963	146840192						chr11	20370372	20370475		chr17	39129207	39129440
chr3	157320833	157322977						chr4	100776032	100779636		chr6	67158649	67159085		chr7	89273211	89274048		chr6	51456667	51468181						chr11	20912135	20912248		chr17	45487440	45487568
chr4	141564076	141567032						chr4	109664150	109667583		chr6	82714327	82714550		chr7	142218810	142219766		chr6	122726876	122730724						chr11	21031382	21031531		chr17	45536453	45536566
chr4	55476389	55479049						chr4	109973812	109986804		chr6	85037772	85038069		chr7	9748033	9748460		chr6	124476922	124481083						chr11	22506087	22506228		chr17	48859037	48859166
chr4	123623417	123625853						chr4	114899526	114911075		chr6	85239033	85239400		chr7	10472101	10472692		chr6	125039189	125039950						chr11	23080572	23080768		chr17	48917538	48917686
chr4	119070839	119075758						chr4	114911553	114914391		chr6	90450214	90450538		chr7	11574194	11574642		chr6	125160255	125163211						chr11	23186038	23186147		chr17	51729973	51730073
chr4	55473891	55476215						chr4	114923827	114927206		chr6	91286633	91286972		chr7	12753403	12754147		chr6	4923786	4924243						chr11	24106379	24106513		chr17	56242056	56242282
chr4	137777717	137779679						chr4	115054957	115059707		chr6	97006710	97007110		chr7	14957181	14957804		chr6	7671120	7674460						chr11	26051327	26051436		chr17	65370197	65370320
chr4	55463791	55465731						chr4	120649160	120650630		chr6	97419974	97420443		chr7	31371272	31371989		chr6	9889875	9890225						chr11	26375464	26375640		chr17	72603259	72603412
chr4	57690527	57691369						chr4	122959847	122962050		chr6	97759355	97759685		chr7	54944429	54945017		chr6	39393069	39394482						chr11	28189408	28189515		chr17	73488030	73488168
chr4	57919618	57920983						chr4	129983718	129986628		chr6	108408154	108408604		chr7	55139933	55140680		chr6	39403246	39406159						chr11	29540937	29541070		chr17	83010953	83011129
chr4	108218797	108219505						chr4	131836047	131838559		chr6	119348171	119348583		chr7	55409609	55410205		chr6	49240908	49243701						chr11	29677965	29678067		chr17	84820724	84820876
chr4	133121450	133122994						chr4	145836683	145837639		chr6	122669371	122669797		chr7	62686435	62687039		chr6	51468331	51470200						chr11	29680113	29680278		chr17	87798543	87798675
chr4	145869658	145871175						chr4	154633832	154638940		chr6	127617593	127617943		chr7	65187754	65188049		chr6	67290143	67296731						chr11	30118214	30118332		chr17	91092830	91092950
chr4	147637685	147638404						chr5	4755113	4759147		chr6	128630080	128630332		chr7	73048999	73049345		chr6	72429833	72439570						chr11	30319157	30319276		chr17	93198382	93198483
chr4	26944120	26945131						chr5	33720939	33724592		chr6	133960731	133961142		chr7	86032645	86033342		chr6	86523110	86526015						chr11	30319885	30320057		chr18	25500533	25500725
chr4	147128130	147128720						chr5	35278174	35281906		chr6	134615345	134615593		chr7	87902689	87903734		chr6	87839591	87843070						chr11	30792831	30792954		chr18	25668116	25668423
chr4	148738088	148739974						chr5	37816342	37829789		chr6	142988729	142989323		chr7	113943272	113943810		chr6	90435534	90437114						chr11	33682845	33682971		chr18	25752862	25753026
chr4	155669974	155670711						chr5	98252988	98256482		chr6	145179635	145179972		chr7	124900617	124901209		chr6	115803578	115808734						chr11	33764369	33764537		chr18	31447122	31447247
chr4	10932034	10933045						chr5	101657012	101669139		chr6	148136018	148136391		chr7	127611004	127612273		chr6	117925619	117929633						chr11	35384077	35384183		chr18	32120101	32120215
chr4	83329248	83330990						chr5	107720404	107727538		chr7	4427210	4427563		chr7	135732411	135733077		chr6	117929805	117930628						chr11	35473931	35474037		chr18	35977601	35977751
chr4	110311937	110313080						chr5	118168647	118172774		chr7	4940197	4940599		chr8	116897283	116897874		chr6	117930920	117935332						chr11	36217641	36217753		chr18	36004744	36004910
chr4	130518941	130520955						chr5	120424048	120441080		chr7	17002278	17002766		chr8	120197711	120198724		chr6	125163331	125165657						chr11	38025260	38025360		chr18	37218274	37218399
chr4	133658191	133661525						chr5	125531266	125535353		chr7	19300721	19300998		chr8	7682711	7683373		chr6	128424446	128425309						chr11	40755405	40755572		chr18	38056471	38056594
chr4	133812910	133816684						chr5	127240237	127244529		chr7	30205391	30205773		chr8	37554138	37554795		chr7	3217569	3223400						chr11	43540736	43540842		chr18	38217078	38217229
chr4	141568968	141573878						chr5	131305757	131308244		chr7	34826412	34826947		chr8	39246998	39247511		chr7	3703882	3710108						chr11	43594434	43594584		chr18	42396210	42396323
chr4	142070297	142072208						chr5	136565270	136569363		chr7	38200986	38201236		chr8	52837599	52838131		chr7	24884595	24892654						chr11	43631188	43631298		chr18	64042701	64042813
chr4	145675296	145676048						chr5	139535218	139555242		chr7	43283244	43283605		chr8	77448517	77449576		chr7	43190063	43192090						chr11	45426265	45426428		chr18	64266574	64266686
chr4	148083203	148086282						chr5	142812915	142817616		chr7	44262703	44263118		chr8	106487208	106487851		chr7	45124539	45128767						chr11	45828153	45828330		chr18	66561065	66561223
chr4	98725207	98729358						chr5	147185287	147192919		chr7	44485132	44485471		chr8	19490622	19491158		chr7	45455851	45461412						chr11	47086034	47086175		chr18	70411138	70411289
chr4	118740926	118741836						chr5	147269285	147278537		chr7	73628090	73628506		chr8	25877051	25877469		chr7	132973502	132984543						chr11	48003661	48003804		chr18	74193265	74193404
chr4	127344635	127346654						chr5	147299753	147309266		chr7	80849681	80850102		chr8	42848981	42849305		chr7	4792921	4799366						chr11	48700095	48700267		chr18	74608238	74608365
chr4	130639358	130642873						chr5	147723019	147728023		chr7	84447122	84447356		chr8	47453882	47454470		chr7	4804540	4808032						chr11	48839208	48839317		chr18	76847474	76847631
chr4	136146458	136147304						chr5	25099199	25101734		chr7	99151266	99151661		chr8	54148411	54149008		chr7	7277888	7278473						chr11	49156110	49156229		chr18	76853160	76853315
chr4	137597016	137598146						chr5	26006733	26008317		chr7	104199837	104200201		chr8	62249988	62250736		chr7	12922359	12923836						chr11	49196254	49196405		chr18	77274333	77274489
chr4	138794248	138795316						chr5	28164944	28169417		chr7	107526324	107526724		chr8	83756669	83757049		chr7	12924695	12928519						chr11	49813075	49813205		chr18	81618369	81618515
chr4	141280871	141286261						chr5	28457116	28468123		chr7	113132125	113132583		chr8	92591296	92591828		chr7	13028213	13035425						chr11	50252309	50252481		chr18	82030188	82030322
chr4	146902292	146903907						chr5	29469726	29480593		chr7	121563525	121563840		chr8	128090270	128090911		chr7	25718558	25719725						chr11	50304139	50304279		chr18	82418891	82419066
chr4	146976121	146977999						chr5	31091750	31095862		chr7	143696128	143696551		chr9	58779473	58780165		chr7	28350919	28354973						chr11	50719914	50720019		chr18	85205323	85205479
chr4	147311317	147313094						chr5	33428919	33436634		chr7	143706601	143707077		chr9	26101805	26102453		chr7	28819512	28821967						chr11	50778838	50779124		chr19	4989057	4989288
chr4	10399457	10400120						chr5	33995250	33998586		chr8	14052611	14053384		chr9	36568183	36568778		chr7	28822215	28823876						chr11	53196188	53196306		chr19	5087933	5088059
chr4	33823502	33824364						chr5	35385479	35401205		chr8	15042674	15043271		chr9	38839742	38840561		chr7	30027030	30029005						chr11	53901165	53901269		chr19	6181742	6181877
chr4	43795274	43796301						chr5	47982776	47987221		chr8	19784373	19784735		chr9	60732742	60733205		chr7	30184009	30185434						chr11	54848116	54848260		chr19	6502707	6502871
chr4	45489691	45490719						chr5	52111513	52116418		chr8	20122011	20122325		chr9	81911435	81911989		chr7	44828748	44832583						chr11	55816095	55816223		chr19	9482732	9482889
chr4	53338631	53340876						chr5	57713801	57722048		chr8	20590615	20590926		chr9	3887617	3888441		chr7	45118742	45124374						chr11	56596059	56596227		chr19	10403203	10403375
chr4	106858921	106860252						chr5	67094111	67102799		chr8	22433022	22433424		chr9	11087750	11088152		chr7	45718020	45721931						chr11	57160621	57160776		chr19	16955793	16955904
chr4	125533682	125535375						chr5	67227463	67232318		chr8	23237766	23238037		chr9	21880129	21880671		chr7	78909497	78912502						chr11	57539113	57539249		chr19	22139305	22139405
chr4	147365454	147366069						chr5	72579564	72582750		chr8	37062325	37062653		chr9	24267165	24267489		chr7	99476172	99483641						chr11	57968109	57968240		chr19	35833109	35833250
chr4	150236316	150240578						chr5	75071597	75080041		chr8	61539875	61540159		chr9	26102819	26103294		chr7	109519213	109526855						chr11	59168218	59168322		chr19	37239241	37239398
chr5	25553657	25557174						chr5	75147710	75155342		chr8	64941362	64941731		chr9	32954074	32954660		chr7	110059428	110061699						chr11	59279140	59279251		chr19	38558938	38559086
chr5	33535004	33537174						chr5	81019540	81023142		chr8	84291721	84292125		chr9	78828922	78829394		chr7	111068450	111071762						chr11	59325823	59325932		chr19	40374856	40374971
chr5	92110562	92113907						chr5	98165784	98167868		chr8	84975433	84975737		chr9	80034721	80035274		chr7	116330364	116332896						chr11	59379643	59379822		chr19	41661157	41661262
chr5	103723942	103725889						chr5	98179410	98190458		chr8	91019785	91020147		chr9	81255583	81256184		chr7	118102357	118109459						chr11	59563796	59563953		chr19	42255883	42256194
chr5	104433921	104435372						chr5	106450391	106462243		chr8	105622364	105622795		chr9	83943709	83944223		chr7	118110791	118116190						chr11	59635454	59635553		chr19	42326017	42326175
chr5	118434595	118437732						chr5	107287992	107289756		chr8	106530597	106530940		chr9	92240335	92240841		chr7	126490397	126491672						chr11	60366407	60366525		chr19	42397400	42397523
chr5	86407025	86408264						chr5	108365534	108370888		chr8	110489355	110489723		chr9	92629915	92630545		chr7	127021110	127023048						chr11	63271851	63271982		chr19	42425359	42425491
chr5	113329220	113331755						chr5	111416026	111421865		chr8	119676430	119676768		chr9	98456910	98457527		chr7	127235806	127239875						chr11	64126190	64126347		chr19	42472978	42473076
chr5	123134516	123143782						chr5	119801943	119806723		chr8	121751502	121751723		chr9	119867930	119868547		chr7	127253867	127255347						chr11	65395934	65396050		chr19	42636781	42636882
chr5	13981861	13983457						chr5	119834744	119842472		chr8	123924728	123925101		chrX	97974909	97976567		chr7	127972416	127975856						chr11	67058671	67058776		chr19	43442424	43442516
chr5	43859962	43861402						chr5	139906676	139913966		chr8	125950277	125950679		chrX	14190967	14191719		chr7	127987238	127995416						chr11	69026683	69026871		chr19	43903040	43903152
chr5	64864498	64867020						chr6	6854033	6867329		chr8	126986477	126986896		chrX	33944172	33944935		chr7	133041940	133044174						chr11	69877188	69877288		chr19	44692482	44692607
chr5	28209454	28211106						chr6	6870852	6883720		chr9	8964564	8964933		chrX	117087201	117089368		chr7	141449446	141452720						chr11	70174067	70174187		chr19	45097990	45098116
chr5	53669617	53674575						chr6	47650733	47663282		chr9	22143345	22143681		chrX	152895745	152896341		chr7	144861326	144867867						chr11	71719119	71719285		chr19	46264902	46265001
chr5	72901867	72903587						chr6	47672065	47675283		chr9	31559409	31559913		chrX	48761532	48762207		chr8	20582832	20584122						chr11	72292186	72292354		chr19	46327073	46327178
chr5	110803929	110804801						chr6	47743056	47745470		chr9	45829195	45829510		chrX	67379274	67380161		chr8	27276229	27280383						chr11	72449655	72449778		chr19	47006483	47006599
chr5	119679472	119683518						chr6	47747325	47751431		chr9	46735645	46736032		chrX	72612869	72613943		chr8	43286973	43295097						chr11	76928833	76928946		chr19	47016607	47016758
chr5	18688327	18689465						chr6	47751701	47754672		chr9	47699091	47699413		chrX	110866307	110866880		chr8	19698281	19699026						chr11	76960646	76960771		chr2	19429112	19429245
chr5	20973664	20974915						chr6	47757542	47760730		chr9	47935325	47935689		chrX	129151074	129151650		chr8	20266739	20267240						chr11	78166323	78166464		chr2	21367384	21367530
chr5	55791498	55792646						chr6	47762140	47764553		chr9	52098674	52099068		chrX	156580801	156581387		chr8	20267410	20268186						chr11	79484047	79484166		chr2	23291137	23291343
chr5	108076043	108078389						chr6	47767461	47768841		chr9	55525770	55526322		chrX	157624218	157624739		chr8	20394022	20395388						chr11	79824183	79824286		chr2	24762019	24762155
chr5	118443811	118446627						chr6	52196964	52242203		chr9	56636348	56636605		chrX	10408860	10409487		chr8	27264269	27264752						chr11	81834326	81834456		chr2	25318948	25319099
chr5	129242015	129242908						chr6	64726790	64735935		chr9	57485720	57486180		chrX	19192366	19193247		chr8	31158097	31159297						chr11	82827526	82827680		chr2	25402470	25402631
chr5	129269696	129270653						chr6	72233980	72236827		chr9	58578733	58579054		chrX	21260465	21260923		chr8	36583419	36585115						chr11	83349140	83349248		chr2	25864000	25864107
chr5	135933741	135936527						chr6	83708000	83713845		chr9	59959368	59959779		chrX	72877562	72878175		chr8	57512482	57514111						chr11	83582889	83583030		chr2	26208197	26208327
chr5	142667691	142669238						chr6	84582511	84590667		chr9	62847664	62848020		chrX	79143247	79143794		chr8	57514516	57519311						chr11	84635116	84635288		chr2	28195089	28195222
chr5	12872596	12874042						chr6	85185359	85193211		chr9	65666063	65666416		chrX	87465830	87466163		chr8	70506625	70508349						chr11	86010149	86010288		chr2	28916112	28916345
chr5	64500289	64501370						chr6	87729827	87733607		chr9	69357862	69358175		chrX	97604803	97605441		chr8	70893085	70897437						chr11	86507548	86507696		chr2	29310098	29310223
chr5	110468743	110470842						chr6	115991619	115995341		chr9	73044116	73044532		chrX	98032115	98032942		chr8	72318955	72325063						chr11	89148128	89148256		chr2	29573693	29573837
chr5	117396224	117397105						chr6	127766685	127770333		chr9	77806716	77807388		chrX	112150932	112151353		chr8	79677702	79678744						chr11	89578652	89578759		chr2	30942911	30943053
chr5	129155086	129156726						chr6	14899710	14902693		chr9	95540581	95540844		chrX	121585283	121586066		chr8	83720397	83726182						chr11	90958728	90958895		chr2	31346213	31346397
chr5	53541010	53545028						chr6	23243453	23256071		chr9	99376568	99377010		chrX	126144671	126145136		chr8	83938468	83942826						chr11	90973820	90973969		chr2	32744379	32744514
chr5	119579251	119580514						chr6	28131891	28136259		chr9	103624738	103625026		chrX	126476984	126477512		chr8	84209136	84210742						chr11	92807042	92807208		chr2	33018130	33018336
chr6	65020383	65026030						chr6	29735378	29737235		chr9	107357669	107357973		chrX	143963689	143964066		chr8	84659292	84662921						chr11	94053549	94053648		chr2	34065201	34065352
chr6	122336581	122343308						chr6	31562102	31566035		chr9	109000718	109001168		chrX	145907956	145908828		chr8	84664119	84666077						chr11	94274299	94274466		chr2	34090675	34090869
chr6	65060768	65061540						chr6	32586099	32588995		chr9	111093068	111093398		chrX	145931299	145931808		chr8	84844288	84845143						chr11	97310262	97310429		chr2	38418062	38418246
chr6	100376146	100380490						chr6	47663442	47664974						chrX	159150964	159151502		chr8	85034537	85036177						chr11	97471504	97471665		chr2	39806804	39807031
chr6	67110974	67114465						chr6	47667772	47670913						chrX	170880873	170881332		chr8	85528958	85529358						chr11	97794396	97794548		chr2	49921980	49922083
chr6	122761910	122767900						chr6	47676399	47679616										chr8	86840240	86841401						chr11	99305697	99305831		chr2	65619898	65620040
chr6	125432458	125434605						chr6	47680737	47682286										chr8	95714892	95719767						chr11	101624132	101624287		chr2	70559626	70559788
chr6	149130780	149131695						chr6	47685044	47687133										chr8	107047766	107048953						chr11	103042860	103043006		chr2	79454276	79454419
chr6	54095677	54097549						chr6	47737039	47741103										chr8	110970498	110971487						chr11	103299222	103299338		chr2	91167508	91167630
chr6	60408597	60412003						chr6	47771812	47773259										chr8	111055323	111057146						chr11	103949349	103949464		chr2	91182497	91182597
chr6	93629269	93630415						chr6	48444523	48446180										chr8	121841154	121843538						chr11	107137703	107137891		chr2	91921279	91921398
chr6	122701898	122704235						chr6	49821195	49823957										chr8	121846117	121847496						chr11	107200621	107200769		chr2	92671818	92671930
chr6	5018923	5020775						chr6	52161684	52181122										chr8	121878604	121880626						chr11	108504416	108504550		chr2	93071770	93071909
chr6	82174710	82175573						chr6	52188837	52193268										chr8	123102337	123106864						chr11	108644593	108644742		chr2	94245492	94245637
chr6	30026276	30027432						chr6	52242386	52255310										chr8	126929221	126934609						chr11	109360935	109361057		chr2	94524668	94524808
chr6	37767386	37768209						chr6	52257893	52267574										chr8	126935097	126938658						chr11	109894451	109894608		chr2	98330108	98330275
chr6	92246226	92246806						chr6	52311627	52319323										chr8	126943366	126945795						chr11	114327783	114327913		chr2	102278092	102278236
chr6	97101606	97102851						chr6	53285749	53289785										chr9	21592134	21593719						chr11	114840337	114840515		chr2	104299303	104299441
chr6	100421589	100423063						chr6	53817483	53822031										chr9	40801177	40808409						chr11	115101621	115101758		chr2	109676006	109676110
chr6	140602904	140603939						chr6	65670782	65674043										chr9	58215235	58220956						chr11	115970395	115970507		chr2	112843023	112843144
chr6	145275786	145276975						chr6	83067816	83071858										chr9	64173375	64180315						chr11	116963420	116963523		chr2	118779671	118779816
chr6	39445445	39446720						chr6	83702058	83705309										chr9	78473195	78482208						chr11	117159989	117160099		chr2	119108649	119108864
chr6	52075652	52080203						chr6	85511149	85514151										chr9	7793599	7799053						chr11	117470781	117470906		chr2	122637725	122637824
chr6	70963702	70964927						chr6	88192658	88201763										chr9	15306145	15310938						chr11	117732363	117732472		chr2	125135894	125136035
chr6	82702436	82704535						chr6	99519654	99523657										chr9	15311073	15319266						chr11	118404057	118404188		chr2	129715790	129715962
chr6	83893080	83894218						chr6	112488130	112491223										chr9	20889820	20894297						chr11	119696111	119696237		chr2	131958093	131958218
chr6	144273043	144274053						chr6	120491734	120494468										chr9	44334409	44338068						chr11	119837137	119837271		chr2	132781734	132781919
chr6	148991461	148994173						chr6	121412004	121414154										chr9	44407702	44413370						chr11	120179895	120180053		chr2	136714212	136714419
chr7	13013309	13015502						chr6	126642170	126646746										chr9	61908403	61914564						chr11	121126576	121126700		chr2	140096150	140096306
chr7	3209050	3214803						chr6	127147780	127157405										chr9	72749854	72751556						chr11	121519817	121519971		chr2	143207315	143207416
chr7	80128867	80131149						chr7	36690599	36699514										chr9	88519308	88522923						chr12	3089532	3089642		chr2	143451796	143451932
chr7	3347048	3348807						chr7	70342516	70353365										chr9	106431488	106434258						chr12	4357413	4357599		chr2	143536607	143536762
chr7	3217281	3223604						chr7	79512571	79516497										chr9	108560162	108560947						chr12	8285523	8285640		chr2	143546886	143546997
chr7	19741434	19742908						chr7	79540830	79545488										chr9	114504187	114506941						chr12	8868704	8868881		chr2	151712759	151712892
chr7	80013777	80016678						chr7	98834208	98840316										chr9	120127769	120134929						chr12	8974783	8974882		chr2	153032331	153032516
chr7	133111762	133118285						chr7	118489103	118492367										chr9	120573742	120577521						chr12	11859606	11859725		chr2	154076394	154076535
chr7	3206043	3208631						chr7	131540400	131549057										chr9	123931611	123934419						chr12	12181782	12181881		chr2	156652923	156653129
chr7	112690324	112692308						chr7	131549231	131557971										chr9	123935368	123937253						chr12	12372657	12372769		chr2	156677020	156677156
chr7	139943511	139946579						chr7	137307881	137323721										chrX	103483098	103487362						chr12	13959136	13959246		chr2	157663729	157663847
chr7	3199776	3202251						chr7	138939739	138942139										chrX	13294581	13295856						chr12	15439340	15439479		chr2	157913228	157913635
chr7	6257930	6259507						chr7	143458065	143461756										chrX	74272148	74274274						chr12	17031588	17031695		chr2	157970803	157970930
chr7	65872761	65874521						chr7	19522366	19524964										chrX	103454944	103457084						chr12	17258786	17258890		chr2	158570505	158570626
chr7	80744923	80746964						chr7	34810332	34813484										chrX	169979137	169983640						chr12	19175218	19175394		chr2	158595193	158595361
chr7	25432890	25434205						chr7	35117290	35121570										chrX	169983744	169985404						chr12	19187240	19187387		chr2	158728187	158728284
chr7	65454013	65454845						chr7	37768226	37774230										chrX	169985565	169995042						chr12	19953603	19953741		chr2	161425741	161425849
chr7	112688118	112689163						chr7	40897568	40901052										chrX	169997910	169999294						chr12	19965645	19965803		chr2	162031771	162031897
chr7	127223645	127226026						chr7	49632153	49640739										chrX	170009253	170022650						chr12	20695101	20695267		chr2	163439316	163439437
chr7	130600096	130601073						chr7	57508234	57510920																		chr12	21073577	21073687		chr2	163564784	163564929
chr7	23470167	23471265						chr7	70279609	70282952																		chr12	24425107	24425244		chr2	163889535	163889706
chr7	34169227	34170214						chr7	70325174	70334337																		chr12	27941422	27941601		chr2	164476758	164476904
chr7	38027810	38030159						chr7	70354213	70364124																		chr12	28797792	28797979		chr2	164966497	164966641
chr7	70788793	70789757						chr7	79502696	79510648																		chr12	28798173	28798305		chr2	164968588	164968759
chr7	107236605	107237476						chr7	81213042	81215239																		chr12	28911985	28912136		chr2	164979872	164980018
chr7	144863137	144865602						chr7	81452715	81455711																		chr12	30900628	30900737		chr2	165159189	165159313
chr7	145138306	145140063						chr7	82867043	82870643																		chr12	35641827	35641987		chr2	165239647	165239761
chr8	36547230	36549622						chr7	99625075	99627679																		chr12	36055676	36055809		chr2	165456861	165456997
chr8	33912442	33915331						chr7	116030306	116040486																		chr12	38654703	38654835		chr2	165687626	165687754
chr8	72333213	72335287						chr7	132596040	132600699																		chr12	39758067	39758236		chr2	167188983	167189139
chr8	84649751	84651784						chr7	139580293	139586366																		chr12	40101604	40101710		chr2	172042188	172042344
chr8	89003241	89005018						chr7	140046888	140050430																		chr12	40291569	40291708		chr2	172241138	172241326
chr8	56251478	56253063						chr7	141293354	141294960																		chr12	41265646	41265808		chr2	172321042	172321157
chr8	89015390	89016231						chr7	143443772	143446916																		chr12	41273629	41273778		chr2	178277334	178277454
chr8	116673025	116675129						chr8	11311144	11314271																		chr12	42135710	42135810		chr2	178735203	178735358
chr8	14013586	14015713						chr8	12387884	12403096																		chr12	43286392	43286572		chr2	179193813	179193990
chr8	18479818	18480605						chr8	26975878	26980681																		chr12	43953700	43953874		chr2	179200633	179200789
chr8	43320464	43321701						chr8	46739122	46742398																		chr12	43961702	43961854		chr2	179698322	179698453
chr8	12502123	12504720						chr8	47410621	47414341																		chr12	47597054	47597167		chr2	180202376	180202460
chr8	57732707	57733370						chr8	64203790	64207195																		chr12	51984562	51984661		chr2	180411130	180411272
chr8	86887170	86889216						chr8	78433414	78438475																		chr12	53424820	53424965		chr2	180417826	180417997
chr8	90827919	90829919						chr8	84704080	84708542																		chr12	54127047	54127185		chr2	180756029	180756191
chr8	120333602	120337715						chr8	84797690	84801406																		chr12	54363382	54363519		chr2	180894511	180894594
chr8	125699179	125701130						chr8	87468057	87473696																		chr12	55484493	55484600		chr2	181126201	181126334
chr8	78068074	78068985						chr8	91797275	91807753																		chr12	56280634	56280754		chr2	181302144	181302353
chr8	85472659	85473863						chr8	92355548	92367288																		chr12	59004033	59004135		chr2	181314111	181314290
chr8	3394510	3395730						chr8	121078602	121090398																		chr12	60788696	60788839		chr2	181764739	181764845
chr8	36538238	36539893						chr8	123537179	123624602																		chr12	62233556	62233681		chr3	19694564	19694712
chr8	40938859	40939560						chr8	11476240	11480100																		chr12	67287783	67287944		chr3	27370260	27370412
chr8	23561668	23562932						chr8	46290770	46297322																		chr12	69012774	69012907		chr3	31308971	31309145
chr8	54076070	54077202						chr8	48841884	48845740																		chr12	69235501	69235610		chr3	66973804	66973940
chr8	68419780	68421410						chr8	57318443	57336402																		chr12	69281068	69281240		chr3	68064879	68065010
chr8	84654551	84657233						chr8	57338795	57341737																		chr12	69595422	69595580		chr3	76074557	76074654
chr8	107594638	107595508						chr8	70083247	70085549																		chr12	70066201	70066349		chr3	80802940	80803066
chr9	58277649	58281246						chr8	70372747	70377362																		chr12	72669650	72669757		chr3	85145697	85145838
chr9	110942983	110949687						chr8	70487867	70496708																		chr12	73295062	73295242		chr3	87033461	87033569
chr9	114583692	114585282						chr8	76898591	76903418																		chr12	74815091	74815226		chr3	87993591	87993688
chr9	75376167	75377119						chr8	84770997	84774310																		chr12	76419312	76419423		chr3	87997439	87997548
chr9	31018351	31019705						chr8	84779579	84788538																		chr12	76829463	76829664		chr3	88220959	88221067
chr9	40239075	40241819						chr8	88452133	88455939																		chr12	77970154	77970308		chr3	89159288	89159406
chr9	97112900	97115161						chr8	102782755	102787640																		chr12	78842511	78842670		chr3	89764396	89764544
chr9	49751058	49752001						chr8	104169808	104172518																		chr12	79720490	79720651		chr3	91213378	91213561
chr9	78367124	78372017						chr8	115705119	115708677																		chr12	80203057	80203158		chr3	96312378	96312499
chr9	118863369	118864334						chr8	121113370	121121109																		chr12	80318057	80318197		chr3	99311030	99311124
chr9	121335450	121336781						chr8	121125301	121129702																		chr12	80791719	80791826		chr3	103573931	103574024
chr9	44332652	44338130						chr8	121729077	121732225																		chr12	81167991	81168111		chr3	105275370	105275522
chr9	13698999	13700144						chr8	122676592	122679157																		chr12	81304552	81304672		chr3	105487306	105487402
chr9	32095230	32096287						chr8	124791705	124796041																		chr12	81431852	81431989		chr3	108214887	108214949
chr9	78373461	78376190						chr8	125053360	125055989																		chr12	81664000	81664123		chr3	113091000	113091210
chr9	96229765	96231089						chr9	31912009	31916946																		chr12	83535536	83535667		chr3	114904154	114904287
chrX	162831271	162832947						chr9	48833353	48838447																		chr12	84203223	84203347		chr3	118431499	118431666
chrX	8008332	8009245						chr9	58196055	58202946																		chr12	84236463	84236615		chr3	152821303	152821457
chrX	101481228	101482817						chr9	74848175	74856278																		chr12	84552761	84552900		chr3	153267521	153267652
chrX	144337208	144338861						chr9	81631474	81634533																		chr12	85084397	85084565		chr4	9269527	9269648
chrX	151123038	151124910						chr9	89907063	89911847																		chr12	85298466	85298568		chr4	15881270	15881318
								chr9	91376099	91385576																		chr12	86925260	86925402		chr4	21712226	21712475
								chr9	95404614	95408667																		chr12	98698092	98698232		chr4	32601258	32601403
								chr9	118475321	118481218																		chr12	99402210	99402372		chr4	41546029	41546203
								chr9	16499572	16502930																		chr12	100759783	100759914		chr4	41606919	41607029
								chr9	23221653	23224694																		chr12	105773080	105773231		chr4	42945208	42945346
								chr9	32539941	32546257																		chr12	105898211	105898354		chr4	44260442	44260611
								chr9	45137666	45139848																		chr12	109949717	109949833		chr4	44434698	44434812
								chr9	63136679	63151986																		chr12	110472375	110472549		chr4	44511815	44511925
								chr9	64019245	64023424																		chr12	110725125	110725316		chr4	44578741	44578856
								chr9	69767480	69770694																		chr12	113886569	113886732		chr4	44704460	44704549
								chr9	71215065	71218332																		chr12	114864572	114864676		chr4	46992975	46993086
								chr9	74859651	74865679																		chr12	115045229	115045359		chr4	62257092	62257201
								chr9	86878553	86881259																		chr12	116981145	116981286		chr4	66399251	66399328
								chr9	87733724	87741111																		chr12	119936701	119936834		chr4	68955750	68955884
								chr9	89878773	89880070																		chr13	3877848	3877979		chr4	87221725	87221836
								chr9	91359315	91370686																		chr13	5149324	5149498		chr4	89313591	89313718
								chr9	98031642	98034368																		chr13	7023476	7023620		chr4	103572093	103572225
								chr9	99867012	99878307																		chr13	7547996	7548159		chr4	106762409	106762487
								chr9	107707420	107710558																		chr13	7624525	7624638		chr4	110088014	110088109
								chr9	110740950	110744796																		chr13	8935867	8936031		chr4	115728821	115728936
								chrX	12085997	12093491																		chr13	9701121	9701233		chr4	117893486	117893648
								chrX	93293698	93299640																		chr13	12260329	12260428		chr4	118721853	118721994
																												chr13	13968867	13969014		chr4	119903908	119904033
																												chr13	16101870	16102013		chr4	120866404	120866554
																												chr13	16487404	16487571		chr4	120880874	120880969
																												chr13	19426717	19426903		chr4	124317203	124317352
																												chr13	20135315	20135464		chr4	124633387	124633514
																												chr13	21285847	21286011		chr4	124860610	124860721
																												chr13	21488430	21488597		chr4	124882448	124882556
																												chr13	23281175	23281330		chr4	125300636	125300791
																												chr13	25162696	25162824		chr4	125328932	125329065
																												chr13	25640955	25641099		chr4	125590653	125590751
																												chr13	25915432	25915605		chr4	125835349	125835481
																												chr13	29593156	29593254		chr4	125996699	125996845
																												chr13	30270187	30270309		chr4	126655423	126655642
																												chr13	32588537	32588659		chr4	127173613	127173776
																												chr13	34508518	34508662		chr4	127619961	127620141
																												chr13	34588092	34588261		chr4	128042761	128042883
																												chr13	37723262	37723361		chr4	129120986	129121111
																												chr13	40829291	40829449		chr4	130532478	130532611
																												chr13	43946644	43946765		chr4	131115382	131115554
																												chr13	45356294	45356419		chr4	131658060	131658181
																												chr13	46079563	46079676		chr4	134020692	134020908
																												chr13	46537677	46537782		chr4	136907177	136907341
																												chr13	48810721	48810859		chr4	136924618	136924818
																												chr13	49605948	49606075		chr4	137676191	137676348
																												chr13	51015156	51015301		chr4	138597930	138598073
																												chr13	51975808	51975929		chr4	139059742	139059845
																												chr13	52230242	52230401		chr4	139885307	139885405
																												chr13	52489232	52489333		chr4	140249530	140249643
																												chr13	53211894	53211998		chr4	140259003	140259319
																												chr13	55872722	55872887		chr4	140283492	140283736
																												chr13	56196322	56196462		chr4	140326830	140326975
																												chr13	59358072	59358231		chr4	140358237	140358397
																												chr13	60486377	60486489		chr4	140439943	140440173
																												chr13	61683571	61683718		chr4	141811528	141811665
																												chr13	62214685	62214868		chr4	147957269	147957380
																												chr13	62688575	62688747		chr4	147985299	147985481
																												chr13	63005694	63005836		chr4	148229780	148229955
																												chr13	65472851	65472986		chr4	148286791	148286976
																												chr13	66098671	66098802		chr4	151162024	151162163
																												chr13	66586258	66586420		chr4	151185867	151186024
																												chr13	67641635	67641762		chr4	151186578	151186719
																												chr13	67649580	67649706		chr4	151289018	151289452
																												chr13	70488264	70488436		chr4	151289018	151289452
																												chr13	73630612	73630765		chr4	151604510	151604982
																												chr13	75642367	75642485		chr4	151605035	151605262
																												chr13	77809300	77809428		chr4	151759235	151759360
																												chr13	79154204	79154313		chr4	151764071	151764205
																												chr13	79973215	79973352		chr4	152158493	152158621
																												chr13	80789816	80789917		chr4	152287052	152287194
																												chr13	82081445	82081552		chr4	152799475	152799799
																												chr13	85925703	85925872		chr4	153189621	153189745
																												chr13	90429786	90429890		chr4	153357652	153357785
																												chr13	93211181	93211308		chr4	153430128	153430217
																												chr13	93225849	93225990		chr4	153679276	153679414
																												chr13	93423355	93423465		chr4	153907733	153907854
																												chr13	93524720	93524880		chr4	154071123	154071238
																												chr13	93586532	93586683		chr4	154466411	154466552
																												chr13	95934384	95934557		chr4	155018766	155018920
																												chr13	97585152	97585285		chr4	155397610	155397779
																												chr13	98201516	98201640		chr4	155859376	155859662
																												chr13	99035736	99035888		chr5	14514983	14515096
																												chr13	99120484	99120636		chr5	22236951	22237087
																												chr13	99262605	99262724		chr5	22943441	22943569
																												chr13	100227210	100227353		chr5	24110198	24110331
																												chr13	101096357	101096475		chr5	24357570	24357703
																												chr13	103712481	103712638		chr5	24416530	24416675
																												chr13	103720464	103720588		chr5	24503125	24503223
																												chr13	104828000	104828161		chr5	25601386	25601476
																												chr13	106092302	106092479		chr5	26535686	26535828
																												chr13	106739687	106739814		chr5	26894497	26894608
																												chr13	106921810	106921927		chr5	27737252	27737401
																												chr13	110020931	110021114		chr5	27841692	27841807
																												chr13	110392804	110392946		chr5	28955157	28955298
																												chr13	112411041	112411164		chr5	31139149	31139282
																												chr13	112696329	112696442		chr5	33438274	33438485
																												chr13	113881025	113881166		chr5	35299767	35299870
																												chr13	114447345	114447493		chr5	35483513	35483647
																												chr13	117165552	117165716		chr5	35531747	35531872
																												chr14	3122323	3122446		chr5	36896314	36896445
																												chr14	3272187	3272321		chr5	37009888	37010023
																												chr14	3280236	3280396		chr5	37015715	37015853
																												chr14	3513859	3514020		chr5	37132005	37132107
																												chr14	3521960	3522079		chr5	37243533	37243667
																												chr14	3753253	3753415		chr5	37257362	37257509
																												chr14	3761350	3761474		chr5	38346740	38346852
																												chr14	3890945	3891076		chr5	38477851	38477951
																												chr14	3894046	3894203		chr5	65467000	65467169
																												chr14	3902071	3902231		chr5	92358122	92358315
																												chr14	4072358	4072483		chr5	99884189	99884309
																												chr14	4157965	4158066		chr5	100150103	100150251
																												chr14	4474602	4474707		chr5	110558463	110558591
																												chr14	4595382	4595541		chr5	111901817	111901986
																												chr14	4603412	4603578		chr5	112024326	112024451
																												chr14	4702097	4702200		chr5	112575576	112575698
																												chr14	4940356	4940527		chr5	112718725	112718925
																												chr14	4948423	4948544		chr5	112824515	112824643
																												chr14	5124384	5124483		chr5	113290338	113290437
																												chr14	5291808	5291912		chr5	113292269	113292415
																												chr14	5342287	5342414		chr5	113407464	113407632
																												chr14	5644319	5644441		chr5	113553556	113553731
																												chr14	5694847	5694950		chr5	113716714	113716820
																												chr14	6333973	6334126		chr5	114015261	114015396
																												chr14	6342041	6342192		chr5	114091218	114091331
																												chr14	6658128	6658259		chr5	114588079	114588222
																												chr14	6666185	6666329		chr5	115946082	115946183
																												chr14	6674244	6674361		chr5	116518228	116518327
																												chr14	6677275	6677379		chr5	116545873	116545984
																												chr14	6980928	6981042		chr5	116591424	116591588
																												chr14	7051944	7052047		chr5	116714385	116714533
																												chr14	7200759	7200859		chr5	116914973	116915131
																												chr14	7394387	7394536		chr5	117264838	117264982
																												chr14	7402452	7402598		chr5	117844744	117844897
																												chr14	7513168	7513275		chr5	120424103	120424275
																												chr14	7602627	7602727		chr5	120961126	120961269
																												chr14	8041080	8041215		chr5	121009553	121009710
																												chr14	8729805	8729940		chr5	121068828	121068952
																												chr14	10042316	10042462		chr5	121078614	121078861
																												chr14	10967354	10967453		chr5	121926574	121926704
																												chr14	11247950	11248092		chr5	124148456	124148552
																												chr14	13241970	13242118		chr5	126651490	126651644
																												chr14	13730731	13730896		chr5	127472025	127472140
																												chr14	13923504	13923656		chr5	128348996	128349120
																												chr14	14241774	14241930		chr5	128852923	128853071
																												chr14	15962019	15962190		chr5	128879244	128879412
																												chr14	16308654	16308803		chr5	128917373	128917503
																												chr14	16342911	16343059		chr5	129287596	129287740
																												chr14	17983563	17983724		chr5	135806781	135806960
																												chr14	18225445	18225544		chr5	135843558	135843685
																												chr14	18422655	18422776		chr5	136240501	136240645
																												chr14	18565163	18565316		chr5	136984988	136985085
																												chr14	18716386	18716492		chr5	137030218	137030353
																												chr14	19166918	19167028		chr5	137031117	137031299
																												chr14	19486863	19486997		chr5	137135094	137135225
																												chr14	19494905	19495081		chr5	137553500	137553676
																												chr14	21536675	21536785		chr5	139979034	139979139
																												chr14	24272821	24272920		chr5	140218025	140218146
																												chr14	24311320	24311488		chr5	141985134	141985301
																												chr14	24652619	24652725		chr5	142694731	142694885
																												chr14	25959508	25959644		chr5	144491415	144491604
																												chr14	26099262	26099412		chr5	145958037	145958215
																												chr14	26111075	26111201		chr5	146360508	146360667
																												chr14	26250683	26250820		chr5	146644666	146644835
																												chr14	26340563	26340706		chr5	148071940	148072092
																												chr14	27437035	27437141		chr5	149488571	149488725
																												chr14	27519402	27519590		chr5	149790162	149790311
																												chr14	28210801	28210904		chr6	8948585	8948728
																												chr14	29533733	29533877		chr6	28345311	28345455
																												chr14	31917699	31917855		chr6	28982537	28982681
																												chr14	32311631	32311810		chr6	31293157	31293250
																												chr14	33657749	33657848		chr6	31717628	31717747
																												chr14	34379210	34379365		chr6	31883879	31884019
																												chr14	34527596	34527704		chr6	32710316	32710414
																												chr14	35455333	35455429		chr6	36378082	36378209
																												chr14	36780367	36780473		chr6	45059227	45059364
																												chr14	37137904	37138057		chr6	48136963	48137124
																												chr14	37897387	37897512		chr6	48552967	48553124
																												chr14	38567459	38567608		chr6	55108450	55108659
																												chr14	38854425	38854616		chr6	58330803	58330983
																												chr14	43117589	43117739		chr6	68799305	68799518
																												chr14	44219403	44219522		chr6	70237206	70237354
																												chr14	44223290	44223434		chr6	84365135	84365229
																												chr14	44708837	44708998		chr6	84674252	84674408
																												chr14	44833265	44833435		chr6	89070113	89070250
																												chr14	45672126	45672225		chr6	89242469	89242617
																												chr14	45742093	45742244		chr6	91221258	91221374
																												chr14	46421480	46421569		chr6	91839698	91839851
																												chr14	47351450	47351580		chr6	95223630	95223765
																												chr14	47829665	47829783		chr6	103754000	103754191
																												chr14	48025220	48025404		chr6	113193825	113194017
																												chr14	48354584	48354721		chr6	113282099	113282224
																												chr14	48695065	48695171		chr6	113843326	113843440
																												chr14	49130865	49130967		chr6	113852389	113852689
																												chr14	53563654	53563841		chr6	113881949	113882095
																												chr14	53571598	53571782		chr6	113962927	113963054
																												chr14	54929877	54929976		chr6	114087236	114087369
																												chr14	54987552	54987691		chr6	114125665	114125768
																												chr14	55911583	55911748		chr6	114187215	114187384
																												chr14	55978764	55978923		chr6	119320642	119320734
																												chr14	55986727	55986915		chr6	121473148	121473352
																												chr14	56126375	56126491		chr6	127767893	127768053
																												chr14	56834716	56834890		chr6	143129599	143129774
																												chr14	59053513	59053618		chr6	147268545	147268678
																												chr14	62037605	62037758		chr7	4178553	4178722
																												chr14	63057712	63057908		chr7	4620099	4620248
																												chr14	63171034	63171197		chr7	6130519	6130618
																												chr14	63773426	63773536		chr7	6410116	6410387
																												chr14	65634212	65634343		chr7	6456513	6456646
																												chr14	65834911	65835061		chr7	7080928	7081142
																												chr14	66195285	66195440		chr7	10325546	10325834
																												chr14	66207602	66207722		chr7	16129561	16129651
																												chr14	70262914	70263056		chr7	16147770	16147919
																												chr14	70562421	70562526		chr7	16183815	16183984
																												chr14	70720800	70720910		chr7	16871756	16871869
																												chr14	72645673	72645790		chr7	18951533	18951669
																												chr14	72725486	72725610		chr7	19147626	19147702
																												chr14	73445998	73446100		chr7	19283096	19283243
																												chr14	76051035	76051141		chr7	19368488	19368637
																												chr14	76084289	76084436		chr7	24359345	24359560
																												chr14	76666223	76666400		chr7	24686877	24687072
																												chr14	76671248	76671347		chr7	24727755	24727926
																												chr14	79142964	79143083		chr7	24950429	24950558
																												chr14	80975437	80975544		chr7	25141924	25142062
																												chr14	82287613	82287763		chr7	25146038	25146193
																												chr14	82437488	82437633		chr7	25306436	25306594
																												chr14	86326276	86326474		chr7	26489593	26489798
																												chr14	86625780	86625948		chr7	27396198	27396315
																												chr14	86810574	86810757		chr7	27653886	27654016
																												chr14	87384584	87384738		chr7	28263929	28264064
																												chr14	99153614	99153745		chr7	30346762	30346895
																												chr14	99961025	99961127		chr7	30434369	30434486
																												chr14	102089897	102090076		chr7	30484347	30484506
																												chr14	102731880	102732069		chr7	31455894	31456079
																												chr14	103060696	103060866		chr7	33543510	33543759
																												chr14	103607046	103607170		chr7	33836764	33836996
																												chr14	103846091	103846237		chr7	34702841	34703010
																												chr14	103899072	103899207		chr7	35215400	35215516
																												chr14	105093347	105093448		chr7	39455889	39456138
																												chr14	106544776	106544943		chr7	40762725	40762849
																												chr14	108233588	108233795		chr7	43483331	43483479
																												chr14	109770404	109770515		chr7	44593905	44594068
																												chr14	114095060	114095221		chr7	44623803	44623927
																												chr14	114103088	114103211		chr7	44770117	44770400
																												chr14	114136731	114136839		chr7	49910530	49910687
																												chr14	114361305	114361404		chr7	51621788	51621962
																												chr14	116917006	116917151		chr7	57592282	57592437
																												chr14	117917575	117917687		chr7	60974246	60974454
																												chr14	118543105	118543277		chr7	64704309	64704469
																												chr14	120303186	120303305		chr7	79499341	79499492
																												chr14	120977280	120977405		chr7	79502322	79502428
																												chr14	122344232	122344330		chr7	81464227	81464381
																												chr14	123047150	123047285		chr7	81493432	81493535
																												chr14	124644336	124644439		chr7	82625483	82625609
																												chr15	4801604	4801767		chr7	84085116	84085274
																												chr15	6888098	6888205		chr7	98195301	98195416
																												chr15	7491202	7491321		chr7	99632434	99632545
																												chr15	8243067	8243211		chr7	99648838	99648953
																												chr15	8557116	8557245		chr7	101419488	101419617
																												chr15	11693573	11693672		chr7	101422279	101422383
																												chr15	12848958	12849058		chr7	101477397	101477511
																												chr15	16354995	16355180		chr7	109129580	109129688
																												chr15	19622505	19622648		chr7	110701768	110701965
																												chr15	19997586	19997758		chr7	112045916	112046044
																												chr15	20005571	20005686		chr7	113219482	113219619
																												chr15	22084376	22084548		chr7	117616399	117616549
																												chr15	27885016	27885133		chr7	117636794	117636964
																												chr15	30029612	30029779		chr7	120426761	120426911
																												chr15	30074287	30074450		chr7	121391330	121391496
																												chr15	30554143	30554277		chr7	121730332	121730506
																												chr15	34067155	34067367		chr7	122670868	122671034
																												chr15	34872340	34872461		chr7	123235559	123235708
																												chr15	35411080	35411241		chr7	124032346	124032469
																												chr15	35943744	35943942		chr7	125985701	125985811
																												chr15	35988069	35988196		chr7	126280932	126281023
																												chr15	36324904	36325023		chr7	126427412	126427591
																												chr15	36371441	36371560		chr7	126825591	126825712
																												chr15	36389855	36390060		chr7	126949928	126950077
																												chr15	37310702	37310839		chr7	127455008	127455176
																												chr15	37403456	37403563		chr7	128231820	128232016
																												chr15	47866645	47866852		chr7	128938143	128938249
																												chr15	48200723	48200842		chr7	129469624	129469771
																												chr15	49970249	49970397		chr7	131245139	131245245
																												chr15	51713517	51713638		chr7	131917521	131917623
																												chr15	53310574	53310733		chr7	131966955	131967036
																												chr15	55869465	55869597		chr7	134864296	134864447
																												chr15	56743629	56743756		chr7	138084060	138084268
																												chr15	58336588	58336688		chr7	138430058	138430180
																												chr15	60009686	60009882		chr7	139160345	139160472
																												chr15	62039129	62039298		chr7	141959257	141959401
																												chr15	65242220	65242361		chr7	141973435	141973604
																												chr15	66152942	66153070		chr7	144294428	144294524
																												chr15	69641522	69641673		chr8	9309577	9309729
																												chr15	73005980	73006146		chr8	9635352	9635519
																												chr15	73195381	73195600		chr8	9769199	9769341
																												chr15	73246604	73246787		chr8	10255886	10256008
																												chr15	74025872	74026013		chr8	14072601	14072861
																												chr15	74665762	74665867		chr8	14393322	14393436
																												chr15	74666889	74667010		chr8	16430073	16430203
																												chr15	74951553	74951704		chr8	28760530	28760649
																												chr15	75032460	75032582		chr8	55754297	55754449
																												chr15	75875346	75875487		chr8	69701875	69702025
																												chr15	75957910	75958079		chr8	70726209	70726330
																												chr15	77463639	77463789		chr8	70885727	70885882
																												chr15	77815841	77816001		chr8	71483969	71484081
																												chr15	78044021	78044123		chr8	74851944	74852098
																												chr15	78233001	78233118		chr8	78431498	78431622
																												chr15	79071281	79071382		chr8	84454696	84454846
																												chr15	79210255	79210388		chr8	84471391	84471562
																												chr15	80128855	80128962		chr8	84947239	84947451
																												chr15	80774803	80774929		chr8	86425489	86425676
																												chr15	81357077	81357207		chr8	87349872	87349998
																												chr15	81959673	81959781		chr8	87531303	87531418
																												chr15	82246314	82246501		chr8	88824071	88824279
																												chr15	82290250	82290359		chr8	93469756	93470013
																												chr15	83193798	83193953		chr8	95979368	95979503
																												chr15	83201786	83201932		chr8	105291049	105291159
																												chr15	84488840	84489006		chr8	105693768	105693901
																												chr15	84494667	84494773		chr8	110196829	110196969
																												chr15	85057857	85057954		chr8	111941347	111941470
																												chr15	85384885	85385025		chr8	112128908	112129164
																												chr15	85859895	85860032		chr8	112404192	112404332
																												chr15	86222118	86222295		chr8	117173813	117173965
																												chr15	86613055	86613181		chr8	118951893	118952038
																												chr15	89370994	89371093		chr8	119164172	119164336
																												chr15	90707551	90707709		chr8	119258759	119258887
																												chr15	93028729	93028898		chr8	121653846	121653939
																												chr15	94487670	94487794		chr8	121736325	121736461
																												chr15	96952602	96952767		chr8	121761615	121761776
																												chr15	98155987	98156176		chr8	123414384	123414524
																												chr15	98258214	98258381		chr8	123891405	123891584
																												chr15	98544692	98544814		chr8	124434664	124434814
																												chr15	100220463	100220590		chr8	124793351	124793459
																												chr15	100222594	100222730		chr8	126382367	126382473
																												chr15	100279639	100279789		chr9	4138905	4139176
																												chr15	100499689	100499838		chr9	20813114	20813246
																												chr15	101508518	101508662		chr9	20857187	20857405
																												chr15	101590034	101590203		chr9	21408135	21408278
																												chr15	102405870	102406002		chr9	21950410	21950633
																												chr15	102675963	102676073		chr9	22050702	22050833
																												chr15	103652087	103652192		chr9	22053816	22053939
																												chr16	3328488	3328597		chr9	27308171	27308322
																												chr16	4009506	4009648		chr9	34837852	34837956
																												chr16	4010133	4010277		chr9	34913113	34913253
																												chr16	4191584	4191699		chr9	38413666	38413762
																												chr16	4681214	4681314		chr9	40269672	40269814
																												chr16	4702770	4702933		chr9	42819366	42819510
																												chr16	4777459	4777570		chr9	43698574	43698675
																												chr16	7424384	7424520		chr9	43915148	43915250
																												chr16	10634125	10634231		chr9	43934772	43934909
																												chr16	11293775	11293974		chr9	43959664	43959824
																												chr16	12769899	12770009		chr9	44007445	44007567
																												chr16	13058407	13058555		chr9	46642819	46642978
																												chr16	13223348	13223482		chr9	46980245	46980371
																												chr16	13890583	13890725		chr9	48898694	48898812
																												chr16	15797409	15797565		chr9	49214843	49214937
																												chr16	16161245	16161403		chr9	50029197	50029273
																												chr16	16866220	16866439		chr9	50958079	50958207
																												chr16	17643584	17643685		chr9	54270999	54271140
																												chr16	20446299	20446405		chr9	56738366	56738562
																												chr16	20511552	20511697		chr9	57468148	57468256
																												chr16	20815585	20815699		chr9	57606136	57606279
																												chr16	20819695	20819852		chr9	58060977	58061133
																												chr16	21982773	21982909		chr9	58841793	58841927
																												chr16	22302702	22302802		chr9	59578427	59578534
																												chr16	22943835	22944022		chr9	61484517	61484661
																												chr16	23442353	23442510		chr9	63151207	63151322
																												chr16	24475671	24475777		chr9	64624659	64624809
																												chr16	28425782	28425906		chr9	64666659	64666821
																												chr16	29823123	29823305		chr9	64667688	64667799
																												chr16	29942203	29942397		chr9	66307434	66307637
																												chr16	29981652	29981770		chr9	74868459	74868639
																												chr16	30572342	30572507		chr9	75683919	75684052
																												chr16	30820417	30820528		chr9	87021759	87021906
																												chr16	30919622	30919751		chr9	89737431	89737540
																												chr16	31587346	31587477		chr9	99218420	99218612
																												chr16	32823129	32823239		chr9	99563870	99564025
																												chr16	33247100	33247250		chr9	100023790	100023907
																												chr16	33790871	33791042		chr9	104569469	104569603
																												chr16	34170599	34170717		chr9	105244143	105244252
																												chr16	36098134	36098280		chr9	105272385	105272540
																												chr16	36139487	36139625		chr9	105693951	105694120
																												chr16	36165450	36165611		chr9	106531408	106531512
																												chr16	36400247	36400434		chr9	106656271	106656426
																												chr16	36529764	36529883		chr9	107381845	107381965
																												chr16	38458745	38458897		chr9	107486981	107487117
																												chr16	41830159	41830263		chr9	108190098	108190185
																												chr16	42297979	42298083		chr9	108825911	108826001
																												chr16	43574187	43574338		chr9	108826972	108827180
																												chr16	44339439	44339561		chr9	113653756	113653866
																												chr16	44610766	44610923		chr9	119149698	119149875
																												chr16	48267614	48267763		chr9	119389079	119389242
																												chr16	48585746	48585859		chr9	121791335	121791456
																												chr16	48629839	48630045		chr9	122006706	122006850
																												chr16	50700264	50700455		chr9	122540214	122540330
																												chr16	55954839	55955027		chrX	7638656	7638794
																												chr16	55962818	55963006		chrX	15963074	15963272
																												chr16	56085636	56085764		chrX	73869437	73869623
																												chr16	56164563	56164689		chrX	74856195	74856338
																												chr16	56742758	56742871		chrX	104208855	104208965
																												chr16	56999550	56999681		chrX	147639718	147639932
																												chr16	61479743	61479847		chrY	1884269	1884441
																												chr16	62861543	62861669		chrY	4003678	4003880
																												chr16	64878902	64879010
																												chr16	64888636	64888746
																												chr16	65869190	65869319
																												chr16	65954720	65954842
																												chr16	68205065	68205194
																												chr16	70596517	70596623
																												chr16	71885875	71886008
																												chr16	75906256	75906395
																												chr16	76642908	76643047
																												chr16	76643332	76643485
																												chr16	80355271	80355421
																												chr16	82789582	82789691
																												chr16	83613623	83613761
																												chr16	90158438	90158577
																												chr16	92022076	92022230
																												chr16	92503200	92503319
																												chr16	93572178	93572287
																												chr16	93574943	93575062
																												chr16	95754943	95755051
																												chr16	97524198	97524301
																												chr16	97889204	97889335
																												chr17	6128158	6128392
																												chr17	6405825	6406020
																												chr17	6571123	6571325
																												chr17	6839811	6839945
																												chr17	7094899	7095030
																												chr17	8542179	8542310
																												chr17	11432262	11432399
																												chr17	12791623	12791782
																												chr17	13855505	13855663
																												chr17	14991394	14991589
																												chr17	15022776	15022948
																												chr17	15054070	15054251
																												chr17	15213707	15213868
																												chr17	16820029	16820173
																												chr17	17504405	17504585
																												chr17	17508723	17508880
																												chr17	20693873	20694044
																												chr17	21438937	21439130
																												chr17	21478216	21478388
																												chr17	21907137	21907293
																												chr17	22090698	22090840
																												chr17	22230925	22231020
																												chr17	22312010	22312152
																												chr17	22737419	22737518
																												chr17	22876921	22877084
																												chr17	24251869	24252017
																												chr17	24604817	24604929
																												chr17	26815990	26816109
																												chr17	26905917	26906042
																												chr17	27387665	27387788
																												chr17	29078982	29079088
																												chr17	29090857	29090999
																												chr17	29140824	29140930
																												chr17	29160152	29160286
																												chr17	30287837	30288010
																												chr17	30559766	30559871
																												chr17	31619359	31619534
																												chr17	32520001	32520137
																												chr17	32542323	32542471
																												chr17	32871586	32871772
																												chr17	32872347	32872492
																												chr17	32878955	32879145
																												chr17	33838392	33838730
																												chr17	34752268	34752378
																												chr17	34760254	34760368
																												chr17	35887898	35888007
																												chr17	36100375	36100524
																												chr17	36107001	36107166
																												chr17	38442458	38442616
																												chr17	40285017	40285136
																												chr17	41940332	41940456
																												chr17	42899181	42899317
																												chr17	43490502	43490650
																												chr17	45020679	45020822
																												chr17	45846237	45846440
																												chr17	47267260	47267384
																												chr17	48485071	48485181
																												chr17	48523666	48523807
																												chr17	52432882	52432995
																												chr17	53672771	53672907
																												chr17	55041358	55041514
																												chr17	55143459	55143600
																												chr17	56225634	56225824
																												chr17	56709796	56709997
																												chr17	56851832	56851938
																												chr17	57121950	57122129
																												chr17	60135835	60136017
																												chr17	64389514	64389624
																												chr17	65833774	65833893
																												chr17	65941953	65942052
																												chr17	66471865	66471993
																												chr17	66485037	66485203
																												chr17	66612422	66612541
																												chr17	68008917	68009035
																												chr17	69421730	69421903
																												chr17	71324234	71324382
																												chr17	72488965	72489064
																												chr17	72966110	72966224
																												chr17	74310362	74310466
																												chr17	79140215	79140342
																												chr17	80938283	80938417
																												chr17	82510246	82510363
																												chr17	82824750	82824858
																												chr17	84931739	84931885
																												chr17	85100407	85100517
																												chr17	85151009	85151115
																												chr17	86161947	86162084
																												chr17	86956925	86957094
																												chr17	87695976	87696123
																												chr17	87821124	87821229
																												chr17	87896381	87896508
																												chr17	88498602	88498756
																												chr17	90823035	90823160
																												chr17	91273986	91274161
																												chr17	91466993	91467112
																												chr17	92067314	92067444
																												chr17	92610152	92610313
																												chr18	3102941	3103048
																												chr18	6174539	6174644
																												chr18	6231641	6231786
																												chr18	6391924	6392070
																												chr18	7651943	7652131
																												chr18	9298316	9298466
																												chr18	10041451	10041617
																												chr18	10045231	10045344
																												chr18	10050845	10050969
																												chr18	10483043	10483178
																												chr18	10977754	10977865
																												chr18	11004173	11004272
																												chr18	12029120	12029256
																												chr18	15093513	15093650
																												chr18	17290979	17291093
																												chr18	17316590	17316749
																												chr18	20980749	20980895
																												chr18	22113032	22113153
																												chr18	23648981	23649112
																												chr18	24532380	24532560
																												chr18	24540295	24540469
																												chr18	26368313	26368436
																												chr18	30520154	30520329
																												chr18	31568166	31568348
																												chr18	34033901	34034023
																												chr18	34291647	34291777
																												chr18	34652491	34652627
																												chr18	35525151	35525316
																												chr18	35528888	35529063
																												chr18	35642988	35643133
																												chr18	36118096	36118238
																												chr18	36464955	36465073
																												chr18	36603098	36603212
																												chr18	37826623	37826730
																												chr18	39128293	39128404
																												chr18	39374941	39375061
																												chr18	40186082	40186287
																												chr18	40482947	40483047
																												chr18	42049364	42049470
																												chr18	42365586	42365711
																												chr18	42388258	42388427
																												chr18	46316946	46317100
																												chr18	47040352	47040502
																												chr18	48490874	48491045
																												chr18	49326968	49327085
																												chr18	56049175	56049284
																												chr18	56392072	56392175
																												chr18	58521397	58521507
																												chr18	58654999	58655151
																												chr18	61278148	61278264
																												chr18	67268701	67268809
																												chr18	69961518	69961654
																												chr18	71243577	71243751
																												chr18	73613888	73614013
																												chr18	74410292	74410406
																												chr18	74420617	74420727
																												chr18	74808449	74808600
																												chr18	76935000	76935171
																												chr18	79828280	79828450
																												chr18	80183622	80183755
																												chr18	80266700	80266830
																												chr18	82546928	82547062
																												chr18	84326298	84326442
																												chr18	84634233	84634366
																												chr18	85872778	85872906
																												chr18	88503480	88503647
																												chr19	3150041	3150223
																												chr19	3153477	3153586
																												chr19	3155418	3155533
																												chr19	3533488	3533684
																												chr19	3759863	3760059
																												chr19	3875176	3875294
																												chr19	4948756	4948909
																												chr19	5837947	5838059
																												chr19	6673569	6673719
																												chr19	7583168	7583298
																												chr19	8546506	8546660
																												chr19	9421442	9421545
																												chr19	11285143	11285302
																												chr19	12660336	12660501
																												chr19	13380524	13380711
																												chr19	16858072	16858184
																												chr19	17909492	17909649
																												chr19	18623774	18623873
																												chr19	20931391	20931503
																												chr19	20937952	20938087
																												chr19	21507757	21507864
																												chr19	21791303	21791470
																												chr19	24561094	24561203
																												chr19	25228130	25228282
																												chr19	26296462	26296635
																												chr19	27264799	27264898
																												chr19	28194331	28194463
																												chr19	29703738	29703838
																												chr19	30190232	30190431
																												chr19	30222657	30222785
																												chr19	31119253	31119378
																												chr19	32913005	32913144
																												chr19	32974872	32974986
																												chr19	35157786	35157931
																												chr19	35943588	35943705
																												chr19	35971433	35971555
																												chr19	36451352	36451465
																												chr19	37208498	37208613
																												chr19	37312341	37312478
																												chr19	39663961	39664066
																												chr19	41058210	41058363
																												chr19	41665630	41665786
																												chr19	41997338	41997508
																												chr19	42022542	42022678
																												chr19	42361278	42361431
																												chr19	44254293	44254477
																												chr19	44594037	44594199
																												chr19	44696916	44697062
																												chr19	44853723	44853866
																												chr19	45352878	45353068
																												chr19	47748964	47749079
																												chr19	48588848	48588966
																												chr19	48736914	48737038
																												chr19	52822588	52822755
																												chr19	53283887	53284028
																												chr19	53588558	53588705
																												chr19	53630024	53630157
																												chr19	53821396	53821535
																												chr19	54058478	54058603
																												chr19	54310589	54310755
																												chr19	55130283	55130500
																												chr19	56666219	56666329
																												chr19	56935937	56936050
																												chr19	58602234	58602417
																												chr19	58757234	58757348
																												chr19	60151860	60151959
																												chr19	60712784	60712930
																												chr19	61312713	61312880
																												chr2	3879277	3879385
																												chr2	4633251	4633395
																												chr2	5810522	5810660
																												chr2	5958712	5958843
																												chr2	6170981	6171154
																												chr2	11003369	11003525
																												chr2	12056346	12056458
																												chr2	12225436	12225553
																												chr2	12335813	12335931
																												chr2	13280303	13280434
																												chr2	13913144	13913307
																												chr2	15063888	15064035
																												chr2	18459138	18459247
																												chr2	19834206	19834352
																												chr2	20381353	20381530
																												chr2	20389323	20389515
																												chr2	20995406	20995526
																												chr2	21522941	21523053
																												chr2	22738759	22738906
																												chr2	26221715	26221815
																												chr2	26308026	26308131
																												chr2	26552007	26552127
																												chr2	26553331	26553444
																												chr2	26556333	26556506
																												chr2	27570938	27571044
																												chr2	27745585	27745708
																												chr2	28500454	28500578
																												chr2	29066520	29066622
																												chr2	30184583	30184728
																												chr2	30520747	30520911
																												chr2	32007856	32008038
																												chr2	32027934	32028041
																												chr2	32073989	32074103
																												chr2	32123242	32123370
																												chr2	32941527	32941632
																												chr2	33082137	33082268
																												chr2	34710824	34710953
																												chr2	34830205	34830304
																												chr2	35560034	35560151
																												chr2	35736232	35736353
																												chr2	36181393	36181517
																												chr2	36745221	36745326
																												chr2	37360312	37360493
																												chr2	38003007	38003118
																												chr2	38410516	38410657
																												chr2	38897311	38897470
																												chr2	38988350	38988450
																												chr2	39583946	39584060
																												chr2	40564795	40564911
																												chr2	45204573	45204723
																												chr2	46742551	46742676
																												chr2	47530254	47530362
																												chr2	47534715	47534843
																												chr2	48356244	48356368
																												chr2	48367462	48367562
																												chr2	50554343	50554518
																												chr2	51323222	51323340
																												chr2	52329841	52329948
																												chr2	53028923	53029118
																												chr2	54106352	54106524
																												chr2	54298279	54298428
																												chr2	54368225	54368379
																												chr2	58624938	58625090
																												chr2	59533653	59533770
																												chr2	60195742	60195846
																												chr2	60268594	60268796
																												chr2	64622509	64622658
																												chr2	65040026	65040169
																												chr2	65368715	65368865
																												chr2	67195868	67196026
																												chr2	68076508	68076641
																												chr2	68925701	68925801
																												chr2	69963364	69963491
																												chr2	69970216	69970318
																												chr2	70449694	70449846
																												chr2	71387944	71388087
																												chr2	72829263	72829439
																												chr2	72995699	72995851
																												chr2	74791134	74791268
																												chr2	75634397	75634528
																												chr2	75768287	75768485
																												chr2	76346228	76346338
																												chr2	77146365	77146487
																												chr2	79685106	79685247
																												chr2	80377602	80377744
																												chr2	82912587	82912757
																												chr2	83686868	83687036
																												chr2	87259863	87259980
																												chr2	87281872	87282069
																												chr2	88061378	88061481
																												chr2	88556384	88556481
																												chr2	93578625	93578742
																												chr2	94013673	94013825
																												chr2	94801106	94801237
																												chr2	94809108	94809226
																												chr2	98614046	98614195
																												chr2	100024146	100024272
																												chr2	100732028	100732166
																												chr2	102303369	102303516
																												chr2	103104077	103104236
																												chr2	103859692	103859854
																												chr2	104517564	104517675
																												chr2	106991455	106991595
																												chr2	107957398	107957563
																												chr2	109050909	109051083
																												chr2	109199512	109199664
																												chr2	109604211	109604316
																												chr2	114178449	114178623
																												chr2	114179563	114179741
																												chr2	118308351	118308482
																												chr2	118637530	118637632
																												chr2	120613194	120613316
																												chr2	122945987	122946133
																												chr2	125256007	125256156
																												chr2	126276970	126277186
																												chr2	126311605	126311714
																												chr2	126942134	126942293
																												chr2	126958630	126958798
																												chr2	128134044	128134192
																												chr2	129378752	129378857
																												chr2	131510383	131510548
																												chr2	132227330	132227511
																												chr2	132487401	132487521
																												chr2	138517017	138517174
																												chr2	138525040	138525204
																												chr2	139753425	139753522
																												chr2	141419059	141419235
																												chr2	142638954	142639097
																												chr2	143909366	143909540
																												chr2	144047389	144047504
																												chr2	144139335	144139452
																												chr2	144511876	144511984
																												chr2	145900584	145900775
																												chr2	146571718	146571876
																												chr2	146819340	146819473
																												chr2	147984968	147985069
																												chr2	149573961	149574113
																												chr2	149939425	149939548
																												chr2	152024278	152024408
																												chr2	152038436	152038556
																												chr2	152250721	152250821
																												chr2	152522694	152522864
																												chr2	152792588	152792717
																												chr2	152964819	152964955
																												chr2	154244679	154244812
																												chr2	156907837	156907983
																												chr2	157057849	157058007
																												chr2	158112401	158112500
																												chr2	160438321	160438473
																												chr2	160987754	160987889
																												chr2	161167666	161167849
																												chr2	162786515	162786654
																												chr2	163516471	163516599
																												chr2	164445182	164445325
																												chr2	164761540	164761735
																												chr2	165410536	165410637
																												chr2	165788962	165789150
																												chr2	168122872	168123046
																												chr2	168354276	168354382
																												chr2	168392303	168392438
																												chr2	168670078	168670216
																												chr2	169728760	169728902
																												chr2	170245870	170245999
																												chr2	172496161	172496266
																												chr2	178599747	178599880
																												chr2	178603439	178603587
																												chr2	178980950	178981058
																												chr2	179909682	179909824
																												chr2	180236567	180236728
																												chr2	180246777	180246929
																												chr2	181057405	181057532
																												chr2	181638067	181638186
																												chr3	3339017	3339129
																												chr3	3660468	3660622
																												chr3	3962246	3962373
																												chr3	7665809	7665957
																												chr3	8919883	8919983
																												chr3	9014939	9015084
																												chr3	9114115	9114243
																												chr3	9538600	9538742
																												chr3	9682426	9682546
																												chr3	9791766	9791882
																												chr3	12846816	12846972
																												chr3	12960806	12960912
																												chr3	12966674	12966854
																												chr3	13241088	13241213
																												chr3	14626361	14626481
																												chr3	14876396	14876540
																												chr3	16072292	16072414
																												chr3	16249919	16250072
																												chr3	16792551	16792723
																												chr3	16800532	16800710
																												chr3	17764793	17764966
																												chr3	19003452	19003552
																												chr3	19743997	19744143
																												chr3	20048297	20048471
																												chr3	21838609	21838734
																												chr3	22267273	22267391
																												chr3	22701488	22701592
																												chr3	22808158	22808337
																												chr3	26823987	26824143
																												chr3	27159667	27159831
																												chr3	28835364	28835494
																												chr3	28963838	28963997
																												chr3	30674712	30674885
																												chr3	31447264	31447400
																												chr3	31454774	31454894
																												chr3	31490794	31490909
																												chr3	32364235	32364423
																												chr3	32526226	32526337
																												chr3	35096871	35096970
																												chr3	36275620	36275749
																												chr3	41324024	41324148
																												chr3	41495970	41496176
																												chr3	46744011	46744178
																												chr3	48123249	48123412
																												chr3	48479729	48479861
																												chr3	50025583	50025675
																												chr3	52603465	52603620
																												chr3	53887831	53887972
																												chr3	55578233	55578391
																												chr3	55586196	55586375
																												chr3	55721577	55721708
																												chr3	56324495	56324598
																												chr3	58211192	58211328
																												chr3	59114421	59114546
																												chr3	60066073	60066184
																												chr3	61363233	61363439
																												chr3	61388706	61388859
																												chr3	63074431	63074595
																												chr3	63247159	63247303
																												chr3	63734087	63734220
																												chr3	65649134	65649241
																												chr3	68760818	68760937
																												chr3	68979232	68979367
																												chr3	69755322	69755497
																												chr3	77120878	77121036
																												chr3	79600757	79600905
																												chr3	81058335	81058496
																												chr3	81184943	81185105
																												chr3	82328407	82328564
																												chr3	84963229	84963335
																												chr3	85638401	85638548
																												chr3	88744162	88744312
																												chr3	89328667	89328768
																												chr3	89573741	89573845
																												chr3	89790062	89790231
																												chr3	90592045	90592200
																												chr3	92194435	92194534
																												chr3	93544087	93544217
																												chr3	95416656	95416772
																												chr3	96254853	96255008
																												chr3	96416793	96416907
																												chr3	96991667	96991784
																												chr3	97019544	97019665
																												chr3	97162871	97163034
																												chr3	100700708	100700853
																												chr3	100720880	100721041
																												chr3	102507344	102507520
																												chr3	103995317	103995491
																												chr3	104454315	104454524
																												chr3	104457385	104457581
																												chr3	105089864	105089979
																												chr3	105421188	105421326
																												chr3	108384565	108384747
																												chr3	109479655	109479811
																												chr3	113091049	113091159
																												chr3	114871795	114871890
																												chr3	115417907	115418009
																												chr3	121289322	121289467
																												chr3	121382308	121382469
																												chr3	121572858	121573004
																												chr3	122211811	122211937
																												chr3	124136764	124136881
																												chr3	131337863	131338044
																												chr3	132245662	132245805
																												chr3	132652714	132652846
																												chr3	134495708	134495870
																												chr3	136790629	136790801
																												chr3	137847753	137847864
																												chr3	139902884	139903015
																												chr3	139926322	139926463
																												chr3	139929882	139930067
																												chr3	140801266	140801398
																												chr3	144555275	144555457
																												chr3	145567594	145567703
																												chr3	148911171	148911274
																												chr3	150746416	150746550
																												chr3	152231895	152232061
																												chr3	153234899	153235008
																												chr3	153242695	153242802
																												chr3	153526339	153526459
																												chr3	153668033	153668147
																												chr3	154031867	154032015
																												chr3	155532179	155532278
																												chr3	156306465	156306614
																												chr3	157903274	157903402
																												chr3	158273077	158273201
																												chr4	3153913	3154060
																												chr4	3356008	3356108
																												chr4	3866095	3866216
																												chr4	4344283	4344387
																												chr4	4447858	4447999
																												chr4	6487427	6487579
																												chr4	10314111	10314281
																												chr4	10885905	10886079
																												chr4	10890137	10890247
																												chr4	11023598	11023726
																												chr4	11036245	11036383
																												chr4	11155034	11155229
																												chr4	11842817	11842934
																												chr4	15678756	15678870
																												chr4	16057285	16057431
																												chr4	17203879	17204024
																												chr4	18544285	18544453
																												chr4	19106383	19106515
																												chr4	19208223	19208398
																												chr4	21589961	21590152
																												chr4	22470229	22470339
																												chr4	24577191	24577338
																												chr4	25712120	25712261
																												chr4	25815862	25816085
																												chr4	28660806	28660977
																												chr4	29310643	29310781
																												chr4	31941600	31941773
																												chr4	31970038	31970190
																												chr4	32891770	32891902
																												chr4	32969451	32969588
																												chr4	33273606	33273744
																												chr4	33375171	33375270
																												chr4	34341391	34341576
																												chr4	34349416	34349546
																												chr4	35551252	35551378
																												chr4	39218644	39218744
																												chr4	39382314	39382470
																												chr4	39390684	39390848
																												chr4	39604399	39604525
																												chr4	40547154	40547339
																												chr4	40898729	40898951
																												chr4	41152908	41153022
																												chr4	41203559	41203672
																												chr4	41483036	41483137
																												chr4	41628431	41628586
																												chr4	41835074	41835221
																												chr4	42345812	42345952
																												chr4	42500548	42500685
																												chr4	43975747	43975922
																												chr4	44264795	44264961
																												chr4	48508805	48508969
																												chr4	48528457	48528561
																												chr4	48793220	48793361
																												chr4	48822205	48822386
																												chr4	51871485	51871623
																												chr4	51879447	51879634
																												chr4	52052968	52053109
																												chr4	52106179	52106303
																												chr4	53292074	53292261
																												chr4	53939388	53939570
																												chr4	53947555	53947741
																												chr4	55206220	55206359
																												chr4	56091137	56091268
																												chr4	59779680	59779802
																												chr4	61887635	61887754
																												chr4	62003814	62003976
																												chr4	62004074	62004218
																												chr4	62061661	62061830
																												chr4	64010067	64010246
																												chr4	64901152	64901317
																												chr4	74231075	74231248
																												chr4	74580553	74580669
																												chr4	75067069	75067261
																												chr4	75075060	75075233
																												chr4	75158143	75158278
																												chr4	76091545	76091644
																												chr4	78623828	78623952
																												chr4	84292236	84292343
																												chr4	84385341	84385454
																												chr4	88113388	88113560
																												chr4	89308349	89308456
																												chr4	94060713	94060816
																												chr4	94479108	94479258
																												chr4	94735117	94735289
																												chr4	95254257	95254435
																												chr4	95262252	95262430
																												chr4	98878210	98878338
																												chr4	101344165	101344283
																												chr4	103169347	103169521
																												chr4	107516295	107516403
																												chr4	108079073	108079226
																												chr4	108308130	108308267
																												chr4	109009387	109009503
																												chr4	110238573	110238678
																												chr4	111335426	111335583
																												chr4	117410739	117410878
																												chr4	118900382	118900545
																												chr4	121216280	121216419
																												chr4	124123380	124123532
																												chr4	124404620	124404746
																												chr4	124471002	124471176
																												chr4	125538568	125538704
																												chr4	126362013	126362130
																												chr4	128575671	128575903
																												chr4	129231637	129231762
																												chr4	130921455	130921592
																												chr4	131387958	131388128
																												chr4	132458259	132458386
																												chr4	133900136	133900244
																												chr4	134401977	134402111
																												chr4	134626438	134626593
																												chr4	134813850	134813962
																												chr4	135300990	135301199
																												chr4	135831237	135831336
																												chr4	137449291	137449444
																												chr4	137902972	137903073
																												chr4	140555560	140555712
																												chr4	141050498	141050602
																												chr4	141304297	141304436
																												chr4	141743576	141743757
																												chr4	142171437	142171568
																												chr4	144417807	144417921
																												chr4	146497772	146497996
																												chr4	148106891	148107027
																												chr4	148654259	148654430
																												chr4	149446535	149446738
																												chr4	149486409	149486521
																												chr4	149504537	149504639
																												chr4	149898623	149898759
																												chr4	150049056	150049188
																												chr4	151352317	151352434
																												chr4	152895309	152895420
																												chr4	155697057	155697165
																												chr4	GL456350	random	122201	122319
																												chr5	3137488	3137612
																												chr5	3673477	3673606
																												chr5	4188886	4189007
																												chr5	4318686	4318799
																												chr5	5874720	5874827
																												chr5	8921785	8921949
																												chr5	8973107	8973275
																												chr5	9979259	9979420
																												chr5	10521524	10521673
																												chr5	16839237	16839336
																												chr5	18562068	18562178
																												chr5	20961033	20961221
																												chr5	21260423	21260561
																												chr5	22542791	22543010
																												chr5	23219679	23219994
																												chr5	23247928	23248110
																												chr5	23343102	23343235
																												chr5	24181906	24182042
																												chr5	24246070	24246237
																												chr5	24659163	24659275
																												chr5	24760348	24760504
																												chr5	26754331	26754455
																												chr5	27454493	27454675
																												chr5	30034248	30034401
																												chr5	30046276	30046416
																												chr5	30091155	30091270
																												chr5	30812377	30812556
																												chr5	31631492	31631622
																												chr5	31942043	31942155
																												chr5	32246323	32246473
																												chr5	32374898	32374999
																												chr5	32582226	32582356
																												chr5	33332979	33333145
																												chr5	33965431	33965593
																												chr5	34989698	34989806
																												chr5	35205576	35205686
																												chr5	35781902	35782072
																												chr5	36737762	36737878
																												chr5	36932339	36932470
																												chr5	43309418	43309553
																												chr5	43857158	43857281
																												chr5	44252061	44252193
																												chr5	45618033	45618182
																												chr5	46002482	46002581
																												chr5	47467684	47467835
																												chr5	52509770	52509882
																												chr5	52751768	52751871
																												chr5	53028863	53029063
																												chr5	57001664	57001796
																												chr5	57065010	57065132
																												chr5	57625085	57625210
																												chr5	57789709	57789839
																												chr5	57790623	57790747
																												chr5	59295892	59296054
																												chr5	61340843	61341018
																												chr5	64402231	64402340
																												chr5	64902871	64902979
																												chr5	64907291	64907428
																												chr5	65003446	65003567
																												chr5	65302886	65303041
																												chr5	65994259	65994417
																												chr5	66471153	66471297
																												chr5	66729189	66729288
																												chr5	67268932	67269046
																												chr5	69241152	69241349
																												chr5	70892392	70892576
																												chr5	73287689	73287804
																												chr5	73350462	73350659
																												chr5	74673969	74674102
																												chr5	78565218	78565351
																												chr5	81625887	81626024
																												chr5	81633848	81634005
																												chr5	82590121	82590219
																												chr5	84894534	84894649
																												chr5	85381764	85381931
																												chr5	86248331	86248452
																												chr5	86730678	86730827
																												chr5	86856452	86856625
																												chr5	87683766	87683924
																												chr5	88605048	88605166
																												chr5	90383171	90383307
																												chr5	90659952	90660061
																												chr5	91110109	91110282
																												chr5	91972244	91972385
																												chr5	92489883	92490011
																												chr5	92510135	92510259
																												chr5	93027393	93027570
																												chr5	99649632	99649786
																												chr5	103732696	103732866
																												chr5	103874804	103874903
																												chr5	104588790	104588960
																												chr5	104643032	104643153
																												chr5	104699562	104699672
																												chr5	104763751	104763858
																												chr5	104880730	104880852
																												chr5	107436921	107437117
																												chr5	110814201	110814330
																												chr5	111594224	111594399
																												chr5	113586167	113586352
																												chr5	113843053	113843181
																												chr5	115260546	115260650
																												chr5	116943028	116943140
																												chr5	116993383	116993507
																												chr5	117895980	117896091
																												chr5	118040163	118040318
																												chr5	118457309	118457434
																												chr5	119589156	119589255
																												chr5	119603299	119603451
																												chr5	120893255	120893394
																												chr5	121582096	121582204
																												chr5	124243364	124243515
																												chr5	125652129	125652247
																												chr5	129916871	129917019
																												chr5	130187601	130187703
																												chr5	130440189	130440357
																												chr5	133834683	133834841
																												chr5	134519663	134519771
																												chr5	134936772	134936940
																												chr5	137085830	137085965
																												chr5	138911303	138911403
																												chr5	139711335	139711447
																												chr5	139723150	139723315
																												chr5	139806412	139806554
																												chr5	143061302	143061421
																												chr5	143131492	143131620
																												chr5	146821155	146821289
																												chr5	148295282	148295381
																												chr5	148420679	148420859
																												chr5	148584575	148584718
																												chr5	149223185	149223302
																												chr5	151671562	151671702
																												chr5	151724482	151724643
																												chr5	151726702	151726822
																												chr6	4117223	4117361
																												chr6	5337296	5337453
																												chr6	5386712	5386832
																												chr6	5821080	5821193
																												chr6	7259300	7259472
																												chr6	7719128	7719295
																												chr6	7727089	7727211
																												chr6	8661572	8661680
																												chr6	11189562	11189720
																												chr6	13576757	13576883
																												chr6	16734329	16734460
																												chr6	17977228	17977360
																												chr6	19958984	19959103
																												chr6	19962458	19962593
																												chr6	20515539	20515633
																												chr6	21353008	21353110
																												chr6	22315342	22315476
																												chr6	23711671	23711824
																												chr6	24714687	24714825
																												chr6	25404164	25404271
																												chr6	29028408	29028539
																												chr6	29223473	29223665
																												chr6	29548188	29548340
																												chr6	29628856	29628972
																												chr6	30979508	30979617
																												chr6	31480100	31480291
																												chr6	31503411	31503568
																												chr6	33248840	33248999
																												chr6	35456901	35457038
																												chr6	35758877	35758977
																												chr6	36735717	36735816
																												chr6	37212952	37213093
																												chr6	37563236	37563384
																												chr6	37749213	37749360
																												chr6	37773469	37773604
																												chr6	37816830	37816959
																												chr6	38366446	38366566
																												chr6	39284965	39285140
																												chr6	39349079	39349198
																												chr6	39437627	39437788
																												chr6	39508679	39508779
																												chr6	39761363	39761526
																												chr6	40048585	40048701
																												chr6	41558329	41558456
																												chr6	43925939	43926080
																												chr6	46251809	46251963
																												chr6	49063010	49063146
																												chr6	49276648	49276821
																												chr6	49493971	49494086
																												chr6	50758268	50758374
																												chr6	52606108	52606265
																												chr6	53529513	53529635
																												chr6	53601743	53601850
																												chr6	54031457	54031596
																												chr6	57317884	57318030
																												chr6	58817486	58817637
																												chr6	58825459	58825639
																												chr6	61049428	61049560
																												chr6	61143956	61144124
																												chr6	62017553	62017696
																												chr6	62567992	62568149
																												chr6	64840704	64840874
																												chr6	65017573	65017746
																												chr6	65510131	65510301
																												chr6	65796748	65796922
																												chr6	66526659	66526813
																												chr6	67028972	67029077
																												chr6	67226315	67226476
																												chr6	68799376	68799492
																												chr6	68812227	68812378
																												chr6	68815895	68816028
																												chr6	72946445	72946544
																												chr6	73230187	73230323
																												chr6	76379625	76379763
																												chr6	80239723	80239851
																												chr6	82857629	82857790
																												chr6	83170907	83171009
																												chr6	86001107	86001270
																												chr6	87069681	87069793
																												chr6	87224725	87224844
																												chr6	87699565	87699717
																												chr6	89309507	89309633
																												chr6	90384364	90384513
																												chr6	90390150	90390288
																												chr6	90754018	90754130
																												chr6	91476672	91476809
																												chr6	91758399	91758553
																												chr6	99384307	99384414
																												chr6	99810976	99811081
																												chr6	101981794	101981951
																												chr6	103964999	103965154
																												chr6	105547987	105548153
																												chr6	107004547	107004653
																												chr6	112663893	112664040
																												chr6	112742074	112742176
																												chr6	113039818	113039989
																												chr6	114667637	114667788
																												chr6	114767442	114767569
																												chr6	116306495	116306626
																												chr6	120187596	120187747
																												chr6	122640681	122640836
																												chr6	124939849	124939983
																												chr6	126310563	126310740
																												chr6	126780131	126780254
																												chr6	128458802	128458927
																												chr6	128717702	128717898
																												chr6	128732923	128733086
																												chr6	132962240	132962401
																												chr6	132970236	132970381
																												chr6	136430774	136430919
																												chr6	136930649	136930757
																												chr6	140620801	140620946
																												chr6	141440122	141440223
																												chr6	144478250	144478351
																												chr6	144526698	144526827
																												chr6	147073413	147073585
																												chr6	147093339	147093500
																												chr6	147218199	147218344
																												chr6	149252209	149252327
																												chr6	149287579	149287693
																												chr6	149355842	149355951
																												chr6	149368488	149368698
																												chr6	149459593	149459724
																												chr7	3013323	3013499
																												chr7	3107075	3107255
																												chr7	4003786	4003933
																												chr7	4250938	4251053
																												chr7	6390019	6390160
																												chr7	6651138	6651238
																												chr7	6792567	6792719
																												chr7	7034946	7035078
																												chr7	7040054	7040194
																												chr7	7148406	7148546
																												chr7	10325576	10325761
																												chr7	11826963	11827112
																												chr7	13168541	13168699
																												chr7	13176546	13176693
																												chr7	16308624	16308745
																												chr7	17948630	17948787
																												chr7	18750169	18750302
																												chr7	26489640	26489769
																												chr7	26690479	26690602
																												chr7	28162302	28162416
																												chr7	28217893	28218008
																												chr7	28485275	28485451
																												chr7	29217214	29217383
																												chr7	29446114	29446257
																												chr7	30830818	30830958
																												chr7	30834923	30835054
																												chr7	32181258	32181438
																												chr7	33146710	33146857
																												chr7	34036987	34037086
																												chr7	34974067	34974173
																												chr7	35528788	35528943
																												chr7	35735691	35735795
																												chr7	36884789	36884925
																												chr7	37214362	37214528
																												chr7	37695217	37695394
																												chr7	39784661	39784785
																												chr7	40054372	40054477
																												chr7	40612748	40612862
																												chr7	42911777	42911898
																												chr7	44708179	44708296
																												chr7	44788113	44788214
																												chr7	45972434	45972588
																												chr7	46251947	46252100
																												chr7	46602165	46602296
																												chr7	47321473	47321602
																												chr7	52326005	52326162
																												chr7	52333979	52334159
																												chr7	55551253	55551409
																												chr7	55726565	55726669
																												chr7	57546801	57546910
																												chr7	63756273	63756401
																												chr7	64327137	64327339
																												chr7	65492318	65492469
																												chr7	65816780	65816937
																												chr7	66502434	66502538
																												chr7	66660318	66660452
																												chr7	67619971	67620131
																												chr7	71017868	71017982
																												chr7	71394747	71394898
																												chr7	72110569	72110726
																												chr7	72749618	72749797
																												chr7	73753381	73753504
																												chr7	73889369	73889540
																												chr7	76339060	76339166
																												chr7	79122424	79122552
																												chr7	79893761	79893899
																												chr7	79954913	79955262
																												chr7	82236046	82236211
																												chr7	82960250	82960362
																												chr7	83091701	83091856
																												chr7	84465898	84466076
																												chr7	85506067	85506186
																												chr7	86488878	86488999
																												chr7	86544379	86544515
																												chr7	88560565	88560703
																												chr7	89951304	89951482
																												chr7	90540904	90541069
																												chr7	96244394	96244507
																												chr7	96864988	96865155
																												chr7	97927980	97928135
																												chr7	98270393	98270514
																												chr7	98398129	98398243
																												chr7	98560275	98560407
																												chr7	98931030	98931175
																												chr7	99032481	99032605
																												chr7	100442451	100442563
																												chr7	100698690	100698882
																												chr7	100943482	100943614
																												chr7	100977574	100977721
																												chr7	101669002	101669146
																												chr7	102459141	102459240
																												chr7	102479419	102479617
																												chr7	107419259	107419416
																												chr7	109610131	109610238
																												chr7	110606996	110607121
																												chr7	110671283	110671428
																												chr7	116380314	116380443
																												chr7	119861341	119861517
																												chr7	120600098	120600232
																												chr7	120608658	120608811
																												chr7	123225281	123225388
																												chr7	125716897	125717004
																												chr7	126255905	126256065
																												chr7	128363010	128363155
																												chr7	128602955	128603101
																												chr7	130093307	130093414
																												chr7	130531048	130531240
																												chr7	130847424	130847566
																												chr7	131014831	131014929
																												chr7	132182795	132182948
																												chr7	132290657	132290759
																												chr7	132729509	132729675
																												chr7	133005859	133006004
																												chr7	134273304	134273417
																												chr7	138000428	138000584
																												chr7	139744394	139744548
																												chr7	141372089	141372188
																												chr7	142194976	142195094
																												chr7	143054433	143054540
																												chr7	143355981	143356106
[truncated: 290 more rows]
