# Supplementary material for: A multi-omics integrative analysis based on CRISPR screens re-defines the pluripotency regulatory network in ESCs
Source: Research Square preprint supplement (doi:10.21203/rs.3.rs-951395/v1), 2023-03-13
Supplement: Supplementary file 8 [file Supplementary Data9.xlsx]

## Sheet: Sheet1
Core				MYC				PRC				PCGF				PAF				TBX
Ensembl ID	Gene Symbol	Proximal/Distal target genes		Ensembl ID	Gene Symbol	Proximal/Distal target genes		Ensembl ID	Gene Symbol	Proximal/Distal target genes		Ensembl ID	Gene Symbol	Proximal/Distal target genes		Ensembl ID	Gene Symbol	Proximal/Distal target genes		Ensembl ID	Gene Symbol	Proximal/Distal target genes
ENSMUSG00000000384	Tbrg4	Distal		ENSMUSG00000000738	Spg7	Distal		ENSMUSG00000000093	Tbx2	Proximal		ENSMUSG00000004071	Cdip1	Distal		ENSMUSG00000000568	Hnrnpd	Distal		ENSMUSG00000000326	Comt	Distal
ENSMUSG00000000486	Septin1	Proximal		ENSMUSG00000000740	Rpl13	Proximal		ENSMUSG00000000094	Tbx4	Proximal		ENSMUSG00000006241	Ccdc159	Distal		ENSMUSG00000000711	Rab5b	Distal		ENSMUSG00000001761	Smo	Proximal
ENSMUSG00000000628	Hk2	Distal		ENSMUSG00000000792	Slc5a5	Proximal		ENSMUSG00000000184	Ccnd2	Proximal		ENSMUSG00000013033	Adgrl1	Distal		ENSMUSG00000000740	Rpl13	Proximal		ENSMUSG00000004347	Pde1c	Proximal
ENSMUSG00000000708	Kat2b	Distal		ENSMUSG00000001056	Nhp2	Distal		ENSMUSG00000000247	Lhx2	Proximal		ENSMUSG00000014725	Adam28	Distal		ENSMUSG00000000792	Slc5a5	Distal		ENSMUSG00000004383	Large1	Proximal
ENSMUSG00000000901	Mmp11	Distal		ENSMUSG00000002221	Paxip1	Proximal		ENSMUSG00000000567	Sox9	Proximal		ENSMUSG00000019066	Rab3d	Distal		ENSMUSG00000001053	N4bp3	Distal		ENSMUSG00000004637	Wwox	Proximal
ENSMUSG00000000902	Smarcb1	Distal		ENSMUSG00000003184	Irf3	Distal		ENSMUSG00000000632	Sez6	Proximal		ENSMUSG00000019986	Ahi1	Proximal		ENSMUSG00000001054	Rmnd5b	Distal		ENSMUSG00000006567	Atp7b	Distal
ENSMUSG00000000903	Vpreb3	Distal		ENSMUSG00000003423	Pih1d1	Distal		ENSMUSG00000000861	Bcl11a	Proximal		ENSMUSG00000020701	Tmem132e	Distal		ENSMUSG00000001056	Nhp2	Proximal		ENSMUSG00000009097	Tbx1	Distal
ENSMUSG00000001435	Col18a1	Distal		ENSMUSG00000003429	Rps11	Distal		ENSMUSG00000000942	Hoxa4	Proximal		ENSMUSG00000021314	Amph	Proximal		ENSMUSG00000001525	Tubb5	Proximal		ENSMUSG00000015533	Itga2	Distal
ENSMUSG00000001604	Tcea3	Distal		ENSMUSG00000003779	Kif20a	Proximal		ENSMUSG00000001076	C1ql4	Distal		ENSMUSG00000021596	Mctp1	Proximal		ENSMUSG00000001552	Jup	Distal		ENSMUSG00000015536	Mocs2	Distal
ENSMUSG00000001909	Trmt1	Distal		ENSMUSG00000004127	Trmt10a	Distal		ENSMUSG00000001496	Nkx2-1	Distal		ENSMUSG00000021738	Atxn7	Proximal		ENSMUSG00000001909	Trmt1	Distal		ENSMUSG00000015747	Vps45	Proximal
ENSMUSG00000001910	Nacc1	Distal		ENSMUSG00000005142	Man2b1	Distal		ENSMUSG00000001497	Pax9	Proximal		ENSMUSG00000022100	Xpo7	Proximal		ENSMUSG00000001910	Nacc1	Distal		ENSMUSG00000016179	Camk1g	Distal
ENSMUSG00000001985	Grik3	Proximal		ENSMUSG00000005150	Wdr83	Distal		ENSMUSG00000001504	Irx2	Proximal		ENSMUSG00000022112	Gpc5	Proximal		ENSMUSG00000002059	Rab34	Distal		ENSMUSG00000019893	Ros1	Proximal
ENSMUSG00000002068	Ccne1	Distal		ENSMUSG00000005481	Ddx39a	Proximal		ENSMUSG00000001510	Dlx3	Proximal		ENSMUSG00000022340	Sybu	Proximal		ENSMUSG00000002076	Hsf2bp	Distal		ENSMUSG00000019990	Pde7b	Proximal
ENSMUSG00000003032	Klf4	Distal		ENSMUSG00000005575	Ube2m	Distal		ENSMUSG00000001566	Mnx1	Proximal		ENSMUSG00000022364	Tbc1d31	Distal		ENSMUSG00000002307	Daxx	Distal		ENSMUSG00000020027	Socs2	Distal
ENSMUSG00000003051	Elf3	Distal		ENSMUSG00000005610	Eif4g2	Distal		ENSMUSG00000001656	Hoxc11	Proximal		ENSMUSG00000022365	Derl1	Distal		ENSMUSG00000002308	Cd320	Distal		ENSMUSG00000020132	Rab21	Distal
ENSMUSG00000003068	Stk11	Distal		ENSMUSG00000006456	Rbm14	Distal		ENSMUSG00000001657	Hoxc8	Distal		ENSMUSG00000022788	Fgd4	Proximal		ENSMUSG00000002372	Ranbp3	Distal		ENSMUSG00000020256	Aldh1l2	Distal
ENSMUSG00000003226	Ranbp2	Distal		ENSMUSG00000006471	Ndor1	Distal		ENSMUSG00000001661	Hoxc6	Proximal		ENSMUSG00000022912	Pros1	Proximal		ENSMUSG00000002608	Ccdc97	Proximal		ENSMUSG00000020524	Gria1	Proximal
ENSMUSG00000003279	Dlgap1	Proximal		ENSMUSG00000007721	Ccdc124	Distal		ENSMUSG00000001761	Smo	Proximal		ENSMUSG00000023075	Akirin1	Distal		ENSMUSG00000002885	Adgre5	Distal		ENSMUSG00000020591	Ntsr2	Distal
ENSMUSG00000003644	Rps6ka1	Distal		ENSMUSG00000007739	Cct4	Proximal		ENSMUSG00000001815	Evx2	Distal		ENSMUSG00000024513	Mbd2	Distal		ENSMUSG00000002908	Kcnn1	Distal		ENSMUSG00000020623	Map2k6	Proximal
ENSMUSG00000003812	Dnase2a	Distal		ENSMUSG00000007833	Aldh16a1	Distal		ENSMUSG00000001819	Hoxd13	Proximal		ENSMUSG00000026425	Srgap2	Proximal		ENSMUSG00000002963	Pnkp	Distal		ENSMUSG00000021065	Fut8	Distal
ENSMUSG00000003813	Rad23a	Distal		ENSMUSG00000007850	Hnrnph1	Proximal		ENSMUSG00000001911	Nfix	Proximal		ENSMUSG00000027285	Haus2	Distal		ENSMUSG00000002968	Med25	Distal		ENSMUSG00000021094	Dhrs7	Distal
ENSMUSG00000004451	Ralb	Distal		ENSMUSG00000008200	Fnbp4	Proximal		ENSMUSG00000002633	Shh	Proximal		ENSMUSG00000027286	Lrrc57	Distal		ENSMUSG00000003038	Hmgn2	Proximal		ENSMUSG00000021303	Gng4	Distal
ENSMUSG00000004500	Zfp324	Distal		ENSMUSG00000008482	Rnf151	Distal		ENSMUSG00000002688	Prkd1	Distal		ENSMUSG00000027523	Gnas	Proximal		ENSMUSG00000003068	Stk11	Proximal		ENSMUSG00000021464	Ror2	Proximal
ENSMUSG00000004633	Chn2	Proximal		ENSMUSG00000008668	Rps18	Proximal		ENSMUSG00000004231	Pax2	Proximal		ENSMUSG00000027809	Etfdh	Distal		ENSMUSG00000003072	Atp5d	Distal		ENSMUSG00000021671	Poc5	Distal
ENSMUSG00000004665	Cnn2	Distal		ENSMUSG00000008976	Gabpa	Proximal		ENSMUSG00000004872	Pax3	Proximal		ENSMUSG00000028268	Gbp3	Distal		ENSMUSG00000003184	Irf3	Distal		ENSMUSG00000021745	nan	Distal
ENSMUSG00000004667	Polr2e	Distal		ENSMUSG00000009079	Ewsr1	Proximal		ENSMUSG00000005220	Corin	Distal		ENSMUSG00000028514	Usp24	Proximal		ENSMUSG00000003380	Rabac1	Distal		ENSMUSG00000021754	Map3k1	Distal
ENSMUSG00000004880	Lbr	Distal		ENSMUSG00000009575	Cbx5	Proximal		ENSMUSG00000005503	Evx1	Proximal		ENSMUSG00000029082	Bst1	Proximal		ENSMUSG00000003423	Pih1d1	Distal		ENSMUSG00000022149	C9	Distal
ENSMUSG00000005148	Klf5	Distal		ENSMUSG00000010097	Nxf1	Distal		ENSMUSG00000005836	Gata6	Proximal		ENSMUSG00000029234	Tmem165	Distal		ENSMUSG00000003429	Rps11	Distal		ENSMUSG00000022253	Nadk2	Distal
ENSMUSG00000005204	Senp3	Distal		ENSMUSG00000010110	Stx5a	Distal		ENSMUSG00000005917	Otx1	Proximal		ENSMUSG00000030815	Phkg2	Distal		ENSMUSG00000003435	Supt5	Distal		ENSMUSG00000022382	Wnt7b	Proximal
ENSMUSG00000005370	Msh6	Proximal		ENSMUSG00000010608	Rbm25	Proximal		ENSMUSG00000006270	Vax1	Distal		ENSMUSG00000030816	Rnf40	Distal		ENSMUSG00000003813	Rad23a	Distal		ENSMUSG00000022383	Ppara	Distal
ENSMUSG00000005575	Ube2m	Distal		ENSMUSG00000012848	Rps5	Distal		ENSMUSG00000006538	Ihh	Proximal		ENSMUSG00000031285	Dcx	Distal		ENSMUSG00000003814	Calr	Proximal		ENSMUSG00000022500	Litaf	Proximal
ENSMUSG00000005687	Bcas2	Distal		ENSMUSG00000013465	Nelfb	Distal		ENSMUSG00000006586	Runx1t1	Proximal		ENSMUSG00000031343	Gabra3	Proximal		ENSMUSG00000003865	Gys1	Proximal		ENSMUSG00000022748	Cmss1	Distal
ENSMUSG00000005892	Trh	Proximal		ENSMUSG00000014226	Cacybp	Proximal		ENSMUSG00000007594	Hapln4	Proximal		ENSMUSG00000031576	Kcnu1	Proximal		ENSMUSG00000003868	Ruvbl2	Distal		ENSMUSG00000023118	Sympk	Proximal
ENSMUSG00000006058	Snf8	Distal		ENSMUSG00000014245	Pigl	Proximal		ENSMUSG00000007805	Twist2	Proximal		ENSMUSG00000033632	AW554918	Proximal		ENSMUSG00000003873	Bax	Distal		ENSMUSG00000023923	Tbc1d5	Distal
ENSMUSG00000006445	Epha2	Distal		ENSMUSG00000015165	Hnrnpl	Proximal		ENSMUSG00000007817	Zmiz1	Proximal		ENSMUSG00000033705	Stard9	Proximal		ENSMUSG00000003970	Rpl8	Proximal		ENSMUSG00000024552	Slc14a2	Proximal
ENSMUSG00000006800	Sulf2	Proximal		ENSMUSG00000015837	Sqstm1	Distal		ENSMUSG00000007888	Crlf1	Proximal		ENSMUSG00000033964	Zbtb41	Distal		ENSMUSG00000004100	Ppan	Proximal		ENSMUSG00000024589	Nedd4l	Proximal
ENSMUSG00000007379	Dennd2c	Proximal		ENSMUSG00000017548	Suz12	Distal		ENSMUSG00000008999	Bmp7	Proximal		ENSMUSG00000034438	Gbp8	Proximal		ENSMUSG00000004266	Ptpn6	Distal		ENSMUSG00000024943	Smc5	Distal
ENSMUSG00000007458	M6pr	Distal		ENSMUSG00000017550	Atad5	Distal		ENSMUSG00000009097	Tbx1	Proximal		ENSMUSG00000034636	Zyg11b	Proximal		ENSMUSG00000004667	Polr2e	Distal		ENSMUSG00000025089	Gfra1	Distal
ENSMUSG00000007880	Arid1a	Distal		ENSMUSG00000017561	Crlf3	Distal		ENSMUSG00000010175	Prox1	Distal		ENSMUSG00000034839	Larp6	Proximal		ENSMUSG00000004880	Lbr	Distal		ENSMUSG00000025245	Lztfl1	Distal
ENSMUSG00000008601	Rab25	Distal		ENSMUSG00000018171	Vmp1	Distal		ENSMUSG00000010461	Eya4	Proximal		ENSMUSG00000035653	Lrfn5	Proximal		ENSMUSG00000004931	Apba3	Distal		ENSMUSG00000025277	Abhd6	Proximal
ENSMUSG00000008604	Ubqln4	Proximal		ENSMUSG00000018362	Kpna2	Proximal		ENSMUSG00000010476	Ebf3	Proximal		ENSMUSG00000037072	Selenof	Distal		ENSMUSG00000004934	Pias4	Distal		ENSMUSG00000025927	Tfap2b	Distal
ENSMUSG00000011256	Adam19	Proximal		ENSMUSG00000018372	Cep95	Proximal		ENSMUSG00000010529	Gm266	Proximal		ENSMUSG00000037143	Cfap61	Proximal		ENSMUSG00000004980	Hnrnpa2b1	Proximal		ENSMUSG00000026031	Cflar	Distal
ENSMUSG00000012396	Nanog	Distal		ENSMUSG00000018379	Srsf1	Proximal		ENSMUSG00000012017	Scarf2	Proximal		ENSMUSG00000038127	Ccdc50	Proximal		ENSMUSG00000004996	Mri1	Distal		ENSMUSG00000026494	Kif26b	Proximal
ENSMUSG00000012848	Rps5	Distal		ENSMUSG00000018501	Ncor1	Proximal		ENSMUSG00000012520	Phox2b	Proximal		ENSMUSG00000038128	Camk4	Proximal		ENSMUSG00000005148	Klf5	Distal		ENSMUSG00000026787	Gad2	Distal
ENSMUSG00000013089	Etv5	Proximal		ENSMUSG00000018583	G3bp1	Proximal		ENSMUSG00000013584	Aldh1a2	Proximal		ENSMUSG00000038156	Spon1	Proximal		ENSMUSG00000005204	Senp3	Distal		ENSMUSG00000028023	Pitx2	Distal
ENSMUSG00000013275	Slc41a1	Distal		ENSMUSG00000018677	Slc25a39	Proximal		ENSMUSG00000014030	Pax5	Proximal		ENSMUSG00000039358	Drd5	Distal		ENSMUSG00000005370	Msh6	Proximal		ENSMUSG00000028370	Pappa	Distal
ENSMUSG00000013415	Igf2bp1	Proximal		ENSMUSG00000018809	Smyd4	Proximal		ENSMUSG00000014704	Hoxa2	Distal		ENSMUSG00000039648	Kyat1	Distal		ENSMUSG00000005470	Asf1b	Distal		ENSMUSG00000029635	Cdk8	Proximal
ENSMUSG00000013858	Tmem259	Distal		ENSMUSG00000018974	Sart3	Proximal		ENSMUSG00000014747	Ankrd53	Distal		ENSMUSG00000039968	Rsbn1l	Distal		ENSMUSG00000005481	Ddx39a	Distal		ENSMUSG00000029640	Usp12	Distal
ENSMUSG00000014245	Pigl	Proximal		ENSMUSG00000019261	Map1s	Distal		ENSMUSG00000014773	Dll1	Proximal		ENSMUSG00000040003	Magi2	Proximal		ENSMUSG00000005575	Ube2m	Distal		ENSMUSG00000029641	Rasl11a	Distal
ENSMUSG00000015341	Golga7	Distal		ENSMUSG00000019432	Ddx39b	Proximal		ENSMUSG00000015053	Gata2	Proximal		ENSMUSG00000040151	Hs2st1	Proximal		ENSMUSG00000005610	Eif4g2	Proximal		ENSMUSG00000029772	Ahcyl2	Distal
ENSMUSG00000016921	Srsf6	Distal		ENSMUSG00000019505	Ubb	Proximal		ENSMUSG00000015501	Hivep2	Proximal		ENSMUSG00000040883	Tmem205	Distal		ENSMUSG00000006333	Rps9	Distal		ENSMUSG00000030077	Chl1	Proximal
ENSMUSG00000017453	Pipox	Proximal		ENSMUSG00000019539	Rcn3	Distal		ENSMUSG00000015579	Nkx2-5	Proximal		ENSMUSG00000041037	Irgq	Distal		ENSMUSG00000006442	Srm	Distal		ENSMUSG00000030256	Bhlhe41	Distal
ENSMUSG00000017550	Atad5	Proximal		ENSMUSG00000020114	Cand1	Proximal		ENSMUSG00000015957	Wnt11	Proximal		ENSMUSG00000041124	Msantd4	Distal		ENSMUSG00000006445	Epha2	Proximal		ENSMUSG00000031478	Nek3	Distal
ENSMUSG00000017561	Crlf3	Distal		ENSMUSG00000020358	Hnrnpab	Proximal		ENSMUSG00000016087	Fli1	Proximal		ENSMUSG00000041272	Tox	Distal		ENSMUSG00000006456	Rbm14	Distal		ENSMUSG00000031543	Ank1	Proximal
ENSMUSG00000017713	Tha1	Distal		ENSMUSG00000020361	Hspa4	Proximal		ENSMUSG00000016346	Kcnq2	Distal		ENSMUSG00000041624	Gucy1a2	Proximal		ENSMUSG00000006469	Slc34a3	Distal		ENSMUSG00000031952	Chst5	Distal
ENSMUSG00000017715	Pgs1	Distal		ENSMUSG00000020368	Canx	Proximal		ENSMUSG00000016458	Wt1	Proximal		ENSMUSG00000043644	0610009L18Rik	Distal		ENSMUSG00000006498	Ptbp1	Proximal		ENSMUSG00000031965	Tbx20	Distal
ENSMUSG00000017764	Zswim1	Proximal		ENSMUSG00000020515	Cnot8	Proximal		ENSMUSG00000016528	Mapkapk2	Distal		ENSMUSG00000045639	Zfp629	Proximal		ENSMUSG00000006673	Qrich1	Proximal		ENSMUSG00000032449	Slc25a36	Distal
ENSMUSG00000017843	Ppp2r5c	Proximal		ENSMUSG00000020585	Laptm4a	Proximal		ENSMUSG00000017412	Cacnb4	Proximal		ENSMUSG00000045763	Basp1	Distal		ENSMUSG00000006728	Cdk4	Proximal		ENSMUSG00000032485	Scap	Distal
ENSMUSG00000017858	Ift52	Proximal		ENSMUSG00000020719	Ddx5	Proximal		ENSMUSG00000018263	Tbx5	Proximal		ENSMUSG00000045876	Pcdhb8	Distal		ENSMUSG00000006736	Tspan31	Proximal		ENSMUSG00000032796	Lama1	Proximal
ENSMUSG00000017861	Mybl2	Proximal		ENSMUSG00000021096	Ppm1a	Proximal		ENSMUSG00000018698	Lhx1	Proximal		ENSMUSG00000047221	Fam185a	Distal		ENSMUSG00000006930	Hap1	Distal		ENSMUSG00000033854	Kcnk10	Distal
ENSMUSG00000018076	Med13l	Distal		ENSMUSG00000021116	Eif2s1	Proximal		ENSMUSG00000018973	Hoxb1	Distal		ENSMUSG00000047420	Fam180a	Distal		ENSMUSG00000007021	Syngr3	Distal		ENSMUSG00000034912	Mdga2	Proximal
ENSMUSG00000018604	Tbx3	Proximal		ENSMUSG00000021131	Erh	Proximal		ENSMUSG00000019230	Lhx9	Proximal		ENSMUSG00000048921	Zfp689	Distal		ENSMUSG00000007570	Fance	Distal		ENSMUSG00000035202	Lars2	Proximal
ENSMUSG00000018677	Slc25a39	Distal		ENSMUSG00000021282	Eif5	Proximal		ENSMUSG00000019647	Sema6a	Proximal		ENSMUSG00000049583	Grm5	Proximal		ENSMUSG00000007721	Ccdc124	Distal		ENSMUSG00000035992	Fnip1	Distal
ENSMUSG00000018727	Cpsf4l	Proximal		ENSMUSG00000021537	Cetn3	Proximal		ENSMUSG00000019789	Hey2	Proximal		ENSMUSG00000052861	Dnah6	Proximal		ENSMUSG00000007833	Aldh16a1	Distal		ENSMUSG00000036814	Slc6a20a	Distal
ENSMUSG00000018752	Tnfsfm13	Distal		ENSMUSG00000021546	Hnrnpk	Proximal		ENSMUSG00000019803	Nr2e1	Distal		ENSMUSG00000052920	Prkg1	Proximal		ENSMUSG00000007850	Hnrnph1	Proximal		ENSMUSG00000037965	Zc3h7a	Proximal
ENSMUSG00000018761	Mpdu1	Distal		ENSMUSG00000021965	Ska3	Proximal		ENSMUSG00000019900	Rfx6	Distal		ENSMUSG00000054920	Klhl5	Distal		ENSMUSG00000007892	Rplp1	Proximal		ENSMUSG00000038119	Cdon	Distal
ENSMUSG00000018765	Fxr2	Distal		ENSMUSG00000021967	Mrpl57	Proximal		ENSMUSG00000020037	Rfx4	Proximal		ENSMUSG00000055761	Nkain3	Proximal		ENSMUSG00000008348	Ubc	Proximal		ENSMUSG00000038624	Nepn	Distal
ENSMUSG00000018774	Cd68	Distal		ENSMUSG00000021969	Zdhhc20	Distal		ENSMUSG00000020052	Ascl1	Proximal		ENSMUSG00000055963	Triqk	Proximal		ENSMUSG00000008668	Rps18	Proximal		ENSMUSG00000040913	Fbxw4	Proximal
ENSMUSG00000018983	E2f2	Distal		ENSMUSG00000022234	Cct5	Proximal		ENSMUSG00000020099	Unc5b	Proximal		ENSMUSG00000056089	Gm5468	Distal		ENSMUSG00000008683	Rps15a	Proximal		ENSMUSG00000041670	Rims1	Proximal
ENSMUSG00000019505	Ubb	Distal		ENSMUSG00000022360	Atad2	Proximal		ENSMUSG00000020160	Meis1	Proximal		ENSMUSG00000057176	Ccdc189	Distal		ENSMUSG00000008690	Ncaph2	Proximal		ENSMUSG00000041930	Fam222a	Distal
ENSMUSG00000019873	Reep3	Proximal		ENSMUSG00000022477	Aco2	Proximal		ENSMUSG00000020679	Hnf1b	Distal		ENSMUSG00000057777	Mab21l2	Distal		ENSMUSG00000009575	Cbx5	Distal		ENSMUSG00000041977	Arhgef11	Distal
ENSMUSG00000019907	Ppp1r12a	Distal		ENSMUSG00000022672	Prkdc	Proximal		ENSMUSG00000020701	Tmem132e	Proximal		ENSMUSG00000058254	Tspan7	Distal		ENSMUSG00000009927	Rps25	Proximal		ENSMUSG00000042385	Gzmk	Proximal
ENSMUSG00000020029	Nudt4	Distal		ENSMUSG00000022673	Mcm4	Proximal		ENSMUSG00000020902	Ntn1	Proximal		ENSMUSG00000061080	Lsamp	Proximal		ENSMUSG00000010095	Slc3a2	Proximal		ENSMUSG00000042596	Tfap2d	Distal
ENSMUSG00000020091	Eif4ebp2	Distal		ENSMUSG00000022792	Yars2	Proximal		ENSMUSG00000020950	Foxg1	Proximal		ENSMUSG00000061576	Dpp6	Proximal		ENSMUSG00000010097	Nxf1	Distal		ENSMUSG00000042901	Aida	Proximal
ENSMUSG00000020092	Pald1	Distal		ENSMUSG00000022890	Atp5j	Proximal		ENSMUSG00000021095	Gsc	Proximal		ENSMUSG00000061601	Pclo	Proximal		ENSMUSG00000010110	Stx5a	Distal		ENSMUSG00000043531	Sorcs1	Proximal
ENSMUSG00000020173	Cobl	Proximal		ENSMUSG00000022961	Son	Proximal		ENSMUSG00000021099	Six6	Distal		ENSMUSG00000061740	Cyp2d22	Distal		ENSMUSG00000011096	Akt1s1	Distal		ENSMUSG00000044912	Syt16	Distal
ENSMUSG00000020186	Csrp2	Distal		ENSMUSG00000022962	Gart	Proximal		ENSMUSG00000021125	Arg2	Proximal		ENSMUSG00000062098	Btbd3	Proximal		ENSMUSG00000012396	Nanog	Distal		ENSMUSG00000046079	Lrrc8d	Distal
ENSMUSG00000020260	Pofut2	Distal		ENSMUSG00000023939	Mrpl14	Distal		ENSMUSG00000021130	Galnt16	Proximal		ENSMUSG00000063297	Luzp2	Proximal		ENSMUSG00000012405	Rpl15	Proximal		ENSMUSG00000046836	Brox	Proximal
ENSMUSG00000020363	Gfpt2	Proximal		ENSMUSG00000023942	Slc29a1	Distal		ENSMUSG00000021217	Tshz3	Proximal		ENSMUSG00000064280	Ccdc146	Distal		ENSMUSG00000012848	Rps5	Proximal		ENSMUSG00000047434	Xxylt1	Distal
ENSMUSG00000020366	Mapk9	Distal		ENSMUSG00000023944	Hsp90ab1	Proximal		ENSMUSG00000021221	Dpf3	Proximal		ENSMUSG00000067942	Zfp160	Proximal		ENSMUSG00000013465	Nelfb	Distal		ENSMUSG00000049252	Lrp1b	Proximal
ENSMUSG00000020407	Upp1	Proximal		ENSMUSG00000024073	Birc6	Proximal		ENSMUSG00000021280	Exoc3l4	Distal		ENSMUSG00000068205	Macrod2	Proximal		ENSMUSG00000013858	Tmem259	Distal		ENSMUSG00000050240	Hic2	Distal
ENSMUSG00000020422	Tns3	Proximal		ENSMUSG00000024097	Srsf7	Proximal		ENSMUSG00000021281	Tnfaip2	Distal		ENSMUSG00000069670	Nkain2	Proximal		ENSMUSG00000015165	Hnrnpl	Proximal		ENSMUSG00000050663	Trhde	Proximal
ENSMUSG00000020707	Rnf135	Distal		ENSMUSG00000024188	Luc7l	Proximal		ENSMUSG00000021359	Tfap2a	Distal		ENSMUSG00000070822	Zscan18	Distal		ENSMUSG00000015335	Zdhhc12	Distal		ENSMUSG00000050786	Ccdc126	Distal
ENSMUSG00000020923	Ubtf	Distal		ENSMUSG00000024312	Wdr46	Proximal		ENSMUSG00000021381	Barx1	Proximal		ENSMUSG00000073155	1810058I24Rik	Distal		ENSMUSG00000015647	Lama5	Distal		ENSMUSG00000051359	Ncald	Distal
ENSMUSG00000021037	Ahsa1	Distal		ENSMUSG00000024319	Vps52	Proximal		ENSMUSG00000021469	Msx2	Proximal		ENSMUSG00000079608	Stard6	Proximal		ENSMUSG00000015656	Hspa8	Proximal		ENSMUSG00000053465	Hs6st3	Proximal
ENSMUSG00000021038	Vipas39	Distal		ENSMUSG00000024325	Ring1	Distal		ENSMUSG00000021506	Pitx1	Proximal		ENSMUSG00000086074	Gm13274	Proximal		ENSMUSG00000015839	Nfe2l2	Distal		ENSMUSG00000056899	Immp2l	Proximal
ENSMUSG00000021464	Ror2	Proximal		ENSMUSG00000024327	Slc39a7	Distal		ENSMUSG00000021508	Cxcl14	Distal		ENSMUSG00000094706	Gm10338	Proximal		ENSMUSG00000015932	Dstn	Proximal		ENSMUSG00000057691	Zfp746	Distal
ENSMUSG00000021678	F2rl1	Distal		ENSMUSG00000024335	Brd2	Proximal		ENSMUSG00000021604	Irx4	Distal						ENSMUSG00000016520	Lnx2	Distal		ENSMUSG00000059203	Il1rapl2	Distal
ENSMUSG00000021681	Aggf1	Distal		ENSMUSG00000024359	Hspa9	Proximal		ENSMUSG00000021638	Ocln	Proximal						ENSMUSG00000016559	H3f3b	Proximal		ENSMUSG00000060924	Csmd1	Proximal
ENSMUSG00000021953	Tdh	Distal		ENSMUSG00000024360	Etf1	Proximal		ENSMUSG00000021685	Otp	Proximal						ENSMUSG00000016921	Srsf6	Proximal		ENSMUSG00000062257	Opcml	Distal
ENSMUSG00000022010	Tsc22d1	Distal		ENSMUSG00000024391	Apom	Distal		ENSMUSG00000021719	Rgs7bp	Proximal						ENSMUSG00000017386	Traf4	Distal		ENSMUSG00000063362	Alg11	Distal
ENSMUSG00000022070	Bora	Distal		ENSMUSG00000024392	Bag6	Distal		ENSMUSG00000021721	Htr1a	Distal						ENSMUSG00000017400	Stac2	Distal		ENSMUSG00000063931	Pepd	Proximal
ENSMUSG00000022204	Ngdn	Distal		ENSMUSG00000024393	Prrc2a	Distal		ENSMUSG00000021743	Fezf2	Proximal						ENSMUSG00000017404	Rpl19	Proximal		ENSMUSG00000064225	Paqr9	Distal
ENSMUSG00000022246	Rai14	Distal		ENSMUSG00000024403	Atp6v1g2	Distal		ENSMUSG00000021765	Fst	Proximal						ENSMUSG00000017405	Nek8	Distal		ENSMUSG00000064262	Gimap8	Distal
ENSMUSG00000022272	Myo10	Proximal		ENSMUSG00000024740	Ddb1	Proximal		ENSMUSG00000021846	Peli2	Distal						ENSMUSG00000017550	Atad5	Distal		ENSMUSG00000069184	Zfp72	Distal
ENSMUSG00000022385	Gtse1	Proximal		ENSMUSG00000024991	Eif3a	Proximal		ENSMUSG00000021848	Otx2	Distal						ENSMUSG00000017861	Mybl2	Proximal		ENSMUSG00000071636	Rimbp3	Distal
ENSMUSG00000022387	Brd1	Proximal		ENSMUSG00000025024	Smndc1	Proximal		ENSMUSG00000021974	Fgf9	Proximal						ENSMUSG00000018102	H2bc4	Proximal		ENSMUSG00000072214	Septin5	Distal
ENSMUSG00000022503	Nubp1	Distal		ENSMUSG00000025130	P4hb	Proximal		ENSMUSG00000021991	Cacna2d3	Proximal						ENSMUSG00000018362	Kpna2	Proximal		ENSMUSG00000074305	Peak1	Proximal
ENSMUSG00000022681	Ntan1	Distal		ENSMUSG00000025132	Arhgdia	Distal		ENSMUSG00000022053	Ebf2	Proximal						ENSMUSG00000018372	Cep95	Distal		ENSMUSG00000074634	Tmem267	Proximal
ENSMUSG00000022682	Rrn3	Distal		ENSMUSG00000025134	Alyref	Distal		ENSMUSG00000022090	Pdlim2	Distal						ENSMUSG00000018543	1700001P01Rik	Proximal		ENSMUSG00000075704	Txnrd2	Distal
ENSMUSG00000022683	Pla2g10	Distal		ENSMUSG00000025135	Anapc11	Distal		ENSMUSG00000022103	Gfra2	Proximal						ENSMUSG00000018559	Ctdnep1	Distal		ENSMUSG00000086269	Tmcc3os	Proximal
ENSMUSG00000022685	Parn	Distal		ENSMUSG00000025236	Adpgk	Proximal		ENSMUSG00000022144	Gdnf	Proximal						ENSMUSG00000018565	Elp5	Distal		ENSMUSG00000086324	Gm15564	Proximal
ENSMUSG00000022848	Slc49a4	Distal		ENSMUSG00000025580	Eif4a3	Proximal		ENSMUSG00000022245	Skor1	Proximal						ENSMUSG00000018570	2810408A11Rik	Distal		ENSMUSG00000089704	Galnt2	Proximal
ENSMUSG00000022849	Hspbap1	Distal		ENSMUSG00000025825	Iscu	Proximal		ENSMUSG00000022330	Osr2	Proximal						ENSMUSG00000018583	G3bp1	Proximal		ENSMUSG00000097327	E030030I06Rik	Proximal
ENSMUSG00000022982	Sod1	Distal		ENSMUSG00000025880	Smad7	Distal		ENSMUSG00000022382	Wnt7b	Distal						ENSMUSG00000018585	Atox1	Distal		ENSMUSG00000110669	Gm10060	Proximal
ENSMUSG00000022995	Enah	Distal		ENSMUSG00000025982	Sf3b1	Proximal		ENSMUSG00000022483	Col2a1	Proximal						ENSMUSG00000018707	Dync1h1	Distal		ENSMUSG00000113136	Gm19951	Proximal
ENSMUSG00000023170	Gps2	Distal		ENSMUSG00000026039	Sgo2a	Proximal		ENSMUSG00000022484	Hoxc10	Distal						ENSMUSG00000018752	Tnfsfm13	Distal
ENSMUSG00000023243	Kcnk5	Distal		ENSMUSG00000026103	Gls	Proximal		ENSMUSG00000022485	Hoxc5	Proximal						ENSMUSG00000018761	Mpdu1	Distal
ENSMUSG00000023393	Slc17a9	Distal		ENSMUSG00000026229	Psmd1	Distal		ENSMUSG00000022994	Adcy6	Distal						ENSMUSG00000018765	Fxr2	Distal
ENSMUSG00000023845	Lnpep	Distal		ENSMUSG00000026234	Ncl	Distal		ENSMUSG00000022996	Wnt10b	Proximal						ENSMUSG00000018774	Cd68	Proximal
ENSMUSG00000023935	Spats1	Proximal		ENSMUSG00000026238	Ptma	Proximal		ENSMUSG00000022997	Wnt1	Proximal						ENSMUSG00000018983	E2f2	Distal
ENSMUSG00000023942	Slc29a1	Proximal		ENSMUSG00000026355	Mcm6	Proximal		ENSMUSG00000023000	Dhh	Distal						ENSMUSG00000019261	Map1s	Distal
ENSMUSG00000023984	Gm20517	Distal		ENSMUSG00000026425	Srgap2	Proximal		ENSMUSG00000023036	Pcdhgc4	Distal						ENSMUSG00000019320	Noxo1	Distal
ENSMUSG00000023988	Bysl	Distal		ENSMUSG00000026466	Tor1aip1	Proximal		ENSMUSG00000023391	Dlx2	Distal						ENSMUSG00000019362	D8Ertd738e	Distal
ENSMUSG00000024042	Sik1	Distal		ENSMUSG00000026622	Nek2	Distal		ENSMUSG00000023755	Rhebl1	Proximal						ENSMUSG00000019432	Ddx39b	Proximal
ENSMUSG00000024048	Myl12a	Distal		ENSMUSG00000026960	Arl6ip6	Proximal		ENSMUSG00000023868	Pde10a	Proximal						ENSMUSG00000019437	Tlcd1	Proximal
ENSMUSG00000024251	Thada	Proximal		ENSMUSG00000026965	Anapc2	Distal		ENSMUSG00000024074	Crim1	Proximal						ENSMUSG00000019494	Cops6	Proximal
ENSMUSG00000024346	Pfdn1	Proximal		ENSMUSG00000026966	Ssna1	Distal		ENSMUSG00000024134	Six2	Proximal						ENSMUSG00000019505	Ubb	Proximal
ENSMUSG00000024359	Hspa9	Distal		ENSMUSG00000027067	Ssrp1	Proximal		ENSMUSG00000024211	Grm8	Proximal						ENSMUSG00000019518	Ap4m1	Distal
ENSMUSG00000024376	Epb41l4a	Proximal		ENSMUSG00000027071	P2rx3	Distal		ENSMUSG00000024245	Tmem178	Proximal						ENSMUSG00000019773	Fbxo5	Distal
ENSMUSG00000024406	Pou5f1	Proximal		ENSMUSG00000027342	Pcna	Proximal		ENSMUSG00000024247	Pkdcc	Proximal						ENSMUSG00000019774	Mtrf1l	Distal
ENSMUSG00000024459	H2-M5	Distal		ENSMUSG00000027405	Nop56	Proximal		ENSMUSG00000024497	Pou4f3	Proximal						ENSMUSG00000020070	Rufy2	Distal
ENSMUSG00000024486	Hbegf	Distal		ENSMUSG00000027496	Aurka	Proximal		ENSMUSG00000024565	Sall3	Distal						ENSMUSG00000020091	Eif4ebp2	Distal
ENSMUSG00000024579	Pcyox1l	Distal		ENSMUSG00000027498	Cstf1	Proximal		ENSMUSG00000024713	Pcsk5	Proximal						ENSMUSG00000020156	Pwwp3a	Distal
ENSMUSG00000024725	Ostf1	Distal		ENSMUSG00000028034	Fubp1	Proximal		ENSMUSG00000024921	Smarca2	Proximal						ENSMUSG00000020232	Hmg20b	Distal
ENSMUSG00000024759	Atl3	Distal		ENSMUSG00000028106	Rprd2	Proximal		ENSMUSG00000024924	Vldlr	Proximal						ENSMUSG00000020235	Fzr1	Distal
ENSMUSG00000024843	Chka	Distal		ENSMUSG00000028639	Ybx1	Proximal		ENSMUSG00000024987	Cyp26a1	Proximal						ENSMUSG00000020307	Cdc34	Proximal
ENSMUSG00000025265	Fgd1	Distal		ENSMUSG00000028680	Plk3	Distal		ENSMUSG00000025081	Tdrd1	Distal						ENSMUSG00000020358	Hnrnpab	Proximal
ENSMUSG00000025423	Pias2	Distal		ENSMUSG00000028820	Sfpq	Proximal		ENSMUSG00000025082	Vwa2	Proximal						ENSMUSG00000020359	Phykpl	Proximal
ENSMUSG00000025602	Zfp202	Distal		ENSMUSG00000029004	Kmt2e	Proximal		ENSMUSG00000025128	Bhlhe22	Proximal						ENSMUSG00000020368	Canx	Distal
ENSMUSG00000025880	Smad7	Distal		ENSMUSG00000029110	Rnf4	Proximal		ENSMUSG00000025215	Tlx1	Proximal						ENSMUSG00000020372	Rack1	Proximal
ENSMUSG00000025956	Mettl21a	Distal		ENSMUSG00000029267	Mtf2	Proximal		ENSMUSG00000025216	Lbx1	Proximal						ENSMUSG00000020437	Myo1g	Distal
ENSMUSG00000025969	Nrp2	Proximal		ENSMUSG00000029326	Enoph1	Distal		ENSMUSG00000025219	Fgf8	Distal						ENSMUSG00000020629	Adi1	Distal
ENSMUSG00000026131	Dst	Proximal		ENSMUSG00000029328	Hnrnpdl	Distal		ENSMUSG00000025318	Jph3	Proximal						ENSMUSG00000020718	Polg2	Proximal
ENSMUSG00000026187	Xrcc5	Distal		ENSMUSG00000029446	Psph	Proximal		ENSMUSG00000025469	Msx3	Proximal						ENSMUSG00000020719	Ddx5	Proximal
ENSMUSG00000026192	Atic	Distal		ENSMUSG00000029447	Cct6a	Proximal		ENSMUSG00000025496	Drd4	Proximal						ENSMUSG00000020741	Cluh	Proximal
ENSMUSG00000026193	Fn1	Proximal		ENSMUSG00000029464	Gpn3	Proximal		ENSMUSG00000025577	Cbx2	Distal						ENSMUSG00000020766	Galk1	Distal
ENSMUSG00000026219	Trip12	Distal		ENSMUSG00000029681	Bcl7b	Proximal		ENSMUSG00000025578	Cbx8	Proximal						ENSMUSG00000020770	Unk	Distal
ENSMUSG00000026229	Psmd1	Distal		ENSMUSG00000029687	Ezh2	Proximal		ENSMUSG00000025582	Nptx1	Distal						ENSMUSG00000020812	Snhg16	Distal
ENSMUSG00000026234	Ncl	Distal		ENSMUSG00000030007	Cct7	Proximal		ENSMUSG00000025586	Cpeb1	Proximal						ENSMUSG00000020882	Cacnb1	Distal
ENSMUSG00000026238	Ptma	Distal		ENSMUSG00000030008	Pradc1	Distal		ENSMUSG00000025608	Podxl	Proximal						ENSMUSG00000020883	Fbxl20	Distal
ENSMUSG00000026356	Dars	Proximal		ENSMUSG00000030264	Thumpd3	Distal		ENSMUSG00000025783	4930412O13Rik	Distal						ENSMUSG00000021037	Ahsa1	Distal
ENSMUSG00000026380	Tfcp2l1	Proximal		ENSMUSG00000030291	Med21	Proximal		ENSMUSG00000025856	Pdgfa	Distal						ENSMUSG00000021038	Vipas39	Distal
ENSMUSG00000026424	Gpr37l1	Distal		ENSMUSG00000030431	Tmem238	Distal		ENSMUSG00000025902	Sox17	Proximal						ENSMUSG00000021040	Slirp	Distal
ENSMUSG00000026437	Cdk18	Distal		ENSMUSG00000030432	Rpl28	Distal		ENSMUSG00000025927	Tfap2b	Proximal						ENSMUSG00000021134	Srsf5	Distal
ENSMUSG00000026439	Rbbp5	Distal		ENSMUSG00000030521	Mphosph10	Proximal		ENSMUSG00000025969	Nrp2	Proximal						ENSMUSG00000021270	Hsp90aa1	Proximal
ENSMUSG00000026456	Cyb5r1	Proximal		ENSMUSG00000030842	Lamtor1	Proximal		ENSMUSG00000026167	Wnt10a	Proximal						ENSMUSG00000021282	Eif5	Proximal
ENSMUSG00000026457	Adipor1	Distal		ENSMUSG00000030846	Tial1	Proximal		ENSMUSG00000026247	Ecel1	Proximal						ENSMUSG00000021319	Sfrp4	Distal
ENSMUSG00000026478	Lamc1	Distal		ENSMUSG00000031016	Wee1	Proximal		ENSMUSG00000026255	Efhd1	Proximal						ENSMUSG00000021546	Hnrnpk	Proximal
ENSMUSG00000026519	Tmem63a	Distal		ENSMUSG00000031024	Denn2b	Distal		ENSMUSG00000026452	Syt2	Proximal						ENSMUSG00000021772	Nkiras1	Proximal
ENSMUSG00000026520	Pycr2	Distal		ENSMUSG00000031467	Agpat5	Proximal		ENSMUSG00000026494	Kif26b	Proximal						ENSMUSG00000021794	Glud1	Distal
ENSMUSG00000026564	Dusp27	Proximal		ENSMUSG00000031691	Tnpo2	Proximal		ENSMUSG00000026610	Esrrg	Proximal						ENSMUSG00000021953	Tdh	Proximal
ENSMUSG00000026576	Atp1b1	Distal		ENSMUSG00000031715	Smarca5	Proximal		ENSMUSG00000026686	Lmx1a	Proximal						ENSMUSG00000022010	Tsc22d1	Proximal
ENSMUSG00000027490	E2f1	Distal		ENSMUSG00000031834	Pik3r2	Distal		ENSMUSG00000026736	4930426L09Rik	Distal						ENSMUSG00000022185	Acin1	Proximal
ENSMUSG00000027502	Rtf2	Distal		ENSMUSG00000031928	Mre11a	Proximal		ENSMUSG00000026739	Bmi1	Proximal						ENSMUSG00000022283	Pabpc1	Distal
ENSMUSG00000027573	Gid8	Proximal		ENSMUSG00000032123	Dpagt1	Proximal		ENSMUSG00000026751	Nr5a1	Distal						ENSMUSG00000022387	Brd1	Proximal
ENSMUSG00000027630	Tbl1xr1	Proximal		ENSMUSG00000032294	Pkm	Proximal		ENSMUSG00000026786	Apbb1ip	Distal						ENSMUSG00000022414	Tab1	Distal
ENSMUSG00000027646	Src	Proximal		ENSMUSG00000032498	Mlh1	Proximal		ENSMUSG00000026787	Gad2	Proximal						ENSMUSG00000022462	Slc38a2	Proximal
ENSMUSG00000027678	Ncoa3	Distal		ENSMUSG00000032637	Atxn2l	Proximal		ENSMUSG00000026826	Nr4a2	Proximal						ENSMUSG00000022601	Zbtb11	Proximal
ENSMUSG00000027680	Fxr1	Distal		ENSMUSG00000033429	Mcee	Proximal		ENSMUSG00000026841	Fibcd1	Proximal						ENSMUSG00000022614	Lmf2	Distal
ENSMUSG00000027703	Lrriq4	Distal		ENSMUSG00000033909	Usp36	Proximal		ENSMUSG00000026872	Zeb2	Distal						ENSMUSG00000022858	Tra2b	Distal
ENSMUSG00000027829	Ccnl1	Distal		ENSMUSG00000033916	Chmp2a	Proximal		ENSMUSG00000026890	Lhx6	Proximal						ENSMUSG00000022881	Rfc4	Distal
ENSMUSG00000027852	Nras	Distal		ENSMUSG00000033961	Zfp446	Distal		ENSMUSG00000027004	Frzb	Proximal						ENSMUSG00000022884	Eif4a2	Proximal
ENSMUSG00000027864	Ptgfrn	Distal		ENSMUSG00000033967	Rnf225	Distal		ENSMUSG00000027030	Stk39	Proximal						ENSMUSG00000022960	Donson	Distal
ENSMUSG00000028013	Ppa2	Distal		ENSMUSG00000034088	Hdlbp	Proximal		ENSMUSG00000027075	Slc43a1	Distal						ENSMUSG00000022961	Son	Proximal
ENSMUSG00000028062	Lamtor2	Distal		ENSMUSG00000034157	Cipc	Proximal		ENSMUSG00000027102	Hoxd8	Proximal						ENSMUSG00000022962	Gart	Distal
ENSMUSG00000028108	Ecm1	Distal		ENSMUSG00000034175	Rhbdd3	Proximal		ENSMUSG00000027168	Pax6	Proximal						ENSMUSG00000022999	Lmbr1l	Distal
ENSMUSG00000028180	Zranb2	Distal		ENSMUSG00000034201	Gas2l1	Distal		ENSMUSG00000027215	Cd82	Distal						ENSMUSG00000023004	Tuba1b	Proximal
ENSMUSG00000028212	Ccne2	Distal		ENSMUSG00000034269	Setd5	Proximal		ENSMUSG00000027217	Tspan18	Distal						ENSMUSG00000023015	Racgap1	Distal
ENSMUSG00000028412	Slc44a1	Distal		ENSMUSG00000034327	Kctd9	Proximal		ENSMUSG00000027296	Itpka	Proximal						ENSMUSG00000023018	Smarcd1	Proximal
ENSMUSG00000028546	Elavl4	Proximal		ENSMUSG00000034543	Morc2a	Proximal		ENSMUSG00000027314	Dll4	Proximal						ENSMUSG00000023020	Cox14	Distal
ENSMUSG00000028560	Usp1	Distal		ENSMUSG00000034681	Rnps1	Proximal		ENSMUSG00000027358	Bmp2	Proximal						ENSMUSG00000023067	Cdkn1a	Distal
ENSMUSG00000028640	Tfap2c	Distal		ENSMUSG00000034993	Vat1	Distal		ENSMUSG00000027434	Nkx2-2	Distal						ENSMUSG00000023169	Slc38a1	Distal
ENSMUSG00000028645	Slc2a1	Distal		ENSMUSG00000034994	Eef2	Proximal		ENSMUSG00000027799	Nbea	Proximal						ENSMUSG00000023170	Gps2	Proximal
ENSMUSG00000028649	Macf1	Proximal		ENSMUSG00000035297	Cops4	Distal		ENSMUSG00000027840	Wnt2b	Proximal						ENSMUSG00000023249	Parp3	Distal
ENSMUSG00000028669	Pithd1	Distal		ENSMUSG00000035325	Sec31a	Distal		ENSMUSG00000027967	Neurog2	Proximal						ENSMUSG00000023262	Acy1	Proximal
ENSMUSG00000028729	Ebna1bp2	Distal		ENSMUSG00000035367	Rmi1	Proximal		ENSMUSG00000027985	Lef1	Proximal						ENSMUSG00000023393	Slc17a9	Distal
ENSMUSG00000028766	Alpl	Proximal		ENSMUSG00000035455	Fignl1	Proximal		ENSMUSG00000028023	Pitx2	Proximal						ENSMUSG00000023495	Pcbp4	Distal
ENSMUSG00000028772	Zcchc17	Distal		ENSMUSG00000035569	Ankrd11	Distal		ENSMUSG00000028184	Adgrl2	Proximal						ENSMUSG00000023902	Zscan10	Proximal
ENSMUSG00000028848	Gpn2	Distal		ENSMUSG00000035834	Polr3g	Distal		ENSMUSG00000028289	Epha7	Proximal						ENSMUSG00000023904	Hcfc1r1	Distal
ENSMUSG00000029007	Agtrap	Proximal		ENSMUSG00000035840	Lysmd3	Distal		ENSMUSG00000028341	Nr4a3	Proximal						ENSMUSG00000023905	Tnfrsf12a	Distal
ENSMUSG00000029061	Mmp23	Distal		ENSMUSG00000036026	Tmem63b	Distal		ENSMUSG00000028360	Slc44a5	Distal						ENSMUSG00000023939	Mrpl14	Distal
ENSMUSG00000029062	Cdk11b	Distal		ENSMUSG00000036552	Ermard	Proximal		ENSMUSG00000028532	Cachd1	Proximal						ENSMUSG00000023942	Slc29a1	Distal
ENSMUSG00000029084	Cd38	Distal		ENSMUSG00000036752	Tubb4b	Proximal		ENSMUSG00000028551	Cdkn2c	Proximal						ENSMUSG00000023944	Hsp90ab1	Proximal
ENSMUSG00000029178	Klf3	Distal		ENSMUSG00000036894	Rap2b	Proximal		ENSMUSG00000028584	Lrrc38	Proximal						ENSMUSG00000023966	Rsph9	Distal
ENSMUSG00000029267	Mtf2	Proximal		ENSMUSG00000036977	Anapc10	Proximal		ENSMUSG00000028631	Kcnq4	Proximal						ENSMUSG00000023973	Cnpy3	Distal
ENSMUSG00000029304	Spp1	Proximal		ENSMUSG00000036990	Otud4	Distal		ENSMUSG00000028640	Tfap2c	Proximal						ENSMUSG00000024006	Stk38	Distal
ENSMUSG00000029313	Aff1	Proximal		ENSMUSG00000037058	Paip2	Distal		ENSMUSG00000028655	Mfsd2a	Proximal						ENSMUSG00000024007	Ppil1	Distal
ENSMUSG00000029363	Rfc5	Distal		ENSMUSG00000037089	Slc35b2	Proximal		ENSMUSG00000028707	Dmbx1	Proximal						ENSMUSG00000024042	Sik1	Distal
ENSMUSG00000029364	Wsb2	Distal		ENSMUSG00000037236	Matr3	Distal		ENSMUSG00000028717	Tal1	Proximal						ENSMUSG00000024095	Hnrnpll	Distal
ENSMUSG00000029405	G3bp2	Distal		ENSMUSG00000037278	Tmem97	Proximal		ENSMUSG00000028736	Pax7	Proximal						ENSMUSG00000024097	Srsf7	Proximal
ENSMUSG00000029449	Rhof	Distal		ENSMUSG00000037337	Map4k1	Distal		ENSMUSG00000028782	Adgrb2	Proximal						ENSMUSG00000024118	Tedc2	Proximal
ENSMUSG00000029503	P2rx2	Distal		ENSMUSG00000037461	Ints7	Proximal		ENSMUSG00000028909	Ptpru	Proximal						ENSMUSG00000024121	Atp6v0c	Distal
ENSMUSG00000029504	Ddx51	Distal		ENSMUSG00000037474	Dtl	Proximal		ENSMUSG00000028944	Prkag2	Proximal						ENSMUSG00000024241	Sos1	Distal
ENSMUSG00000029507	Pus1	Distal		ENSMUSG00000037649	H2-DMa	Distal		ENSMUSG00000029026	Trp73	Distal						ENSMUSG00000024308	Tapbp	Distal
ENSMUSG00000029512	Ulk1	Proximal		ENSMUSG00000037808	Fam76b	Proximal		ENSMUSG00000029056	Pank4	Distal						ENSMUSG00000024312	Wdr46	Proximal
ENSMUSG00000029576	Radil	Distal		ENSMUSG00000037815	Ctnna1	Distal		ENSMUSG00000029108	Pcdh7	Proximal						ENSMUSG00000024319	Vps52	Distal
ENSMUSG00000029578	Wipi2	Proximal		ENSMUSG00000037894	H2az1	Proximal		ENSMUSG00000029112	Nkx1-1	Proximal						ENSMUSG00000024325	Ring1	Distal
ENSMUSG00000029581	Fscn1	Distal		ENSMUSG00000038290	Smg6	Distal		ENSMUSG00000029126	Nsg1	Distal						ENSMUSG00000024327	Slc39a7	Distal
ENSMUSG00000029920	Smarcad1	Proximal		ENSMUSG00000038335	Tsr1	Proximal		ENSMUSG00000029231	Pdgfra	Proximal						ENSMUSG00000024335	Brd2	Distal
ENSMUSG00000029922	Mkrn1	Distal		ENSMUSG00000038351	Sgsm2	Distal		ENSMUSG00000029337	Fgf5	Proximal						ENSMUSG00000024359	Hspa9	Proximal
ENSMUSG00000030042	Pole4	Proximal		ENSMUSG00000038646	Ramac	Distal		ENSMUSG00000029338	Antxr2	Distal						ENSMUSG00000024360	Etf1	Distal
ENSMUSG00000030232	Aebp2	Distal		ENSMUSG00000038806	Sde2	Proximal		ENSMUSG00000029546	Uncx	Proximal						ENSMUSG00000024387	Csnk2b	Distal
ENSMUSG00000030327	Necap1	Distal		ENSMUSG00000039065	Atpsckmt	Proximal		ENSMUSG00000029563	Foxp2	Proximal						ENSMUSG00000024391	Apom	Distal
ENSMUSG00000030342	Cd9	Distal		ENSMUSG00000039197	Adk	Proximal		ENSMUSG00000029595	Lhx5	Proximal						ENSMUSG00000024392	Bag6	Proximal
ENSMUSG00000030421	Uri1	Distal		ENSMUSG00000039630	Hnrnpu	Distal		ENSMUSG00000029644	Pdx1	Proximal						ENSMUSG00000024393	Prrc2a	Distal
ENSMUSG00000030513	Pcsk6	Proximal		ENSMUSG00000039640	Mrpl12	Proximal		ENSMUSG00000029646	Cdx2	Proximal						ENSMUSG00000024422	Dhx16	Distal
ENSMUSG00000030541	Idh2	Distal		ENSMUSG00000039656	Rxrb	Distal		ENSMUSG00000029648	Flt1	Proximal						ENSMUSG00000024427	Spry4	Proximal
ENSMUSG00000030672	Mylpf	Distal		ENSMUSG00000039990	Edrf1	Proximal		ENSMUSG00000029697	Fezf1	Proximal						ENSMUSG00000024429	Gnl1	Distal
ENSMUSG00000030970	Ctbp2	Proximal		ENSMUSG00000040414	Slc25a28	Proximal		ENSMUSG00000029705	Cux1	Proximal						ENSMUSG00000024436	Mrps18b	Distal
ENSMUSG00000031074	Fgf3	Distal		ENSMUSG00000040594	Ranbp17	Distal		ENSMUSG00000029754	Dlx6	Proximal						ENSMUSG00000024459	H2-M5	Distal
ENSMUSG00000031149	Praf2	Distal		ENSMUSG00000040688	Tbl3	Distal		ENSMUSG00000029755	Dlx5	Proximal						ENSMUSG00000024462	Gabbr1	Distal
ENSMUSG00000031161	Hdac6	Distal		ENSMUSG00000040888	Gfer	Distal		ENSMUSG00000029757	Dync1i1	Distal						ENSMUSG00000024480	Ap3s1	Distal
ENSMUSG00000031520	Vegfc	Proximal		ENSMUSG00000040940	Arhgef1	Distal		ENSMUSG00000029765	Plxna4	Proximal						ENSMUSG00000024576	Csnk1a1	Distal
ENSMUSG00000031586	Rbpms	Proximal		ENSMUSG00000040952	Rps19	Proximal		ENSMUSG00000029819	Npy	Proximal						ENSMUSG00000024578	Il17b	Distal
ENSMUSG00000031652	N4bp1	Proximal		ENSMUSG00000041126	H2az2	Distal		ENSMUSG00000029844	Hoxa1	Distal						ENSMUSG00000024937	Ehbp1l1	Distal
ENSMUSG00000031665	Sall1	Distal		ENSMUSG00000041203	Trir	Distal		ENSMUSG00000030067	Foxp1	Proximal						ENSMUSG00000025132	Arhgdia	Distal
ENSMUSG00000031684	Slc10a7	Distal		ENSMUSG00000041684	Bivm	Distal		ENSMUSG00000030123	Plxnd1	Proximal						ENSMUSG00000025280	Polr3a	Distal
ENSMUSG00000031700	Gpt2	Distal		ENSMUSG00000042202	Slc35e2	Proximal		ENSMUSG00000030495	Slc7a10	Distal						ENSMUSG00000025290	Rps24	Proximal
ENSMUSG00000031758	Cdyl2	Proximal		ENSMUSG00000042406	Atf4	Proximal		ENSMUSG00000030507	Dbx1	Proximal						ENSMUSG00000025316	Banp	Distal
ENSMUSG00000031994	Adamts8	Distal		ENSMUSG00000042419	Nfkbil1	Distal		ENSMUSG00000030551	Nr2f2	Proximal						ENSMUSG00000025358	Cdk2	Distal
ENSMUSG00000032123	Dpagt1	Proximal		ENSMUSG00000042650	Alkbh5	Proximal		ENSMUSG00000030664	Sox6os	Distal						ENSMUSG00000025359	Pmel	Distal
ENSMUSG00000032333	Stoml1	Distal		ENSMUSG00000042851	Zc3h6	Proximal		ENSMUSG00000031502	Col4a1	Proximal						ENSMUSG00000025362	Rps26	Proximal
ENSMUSG00000032346	Ooep	Proximal		ENSMUSG00000043284	Tmem11	Proximal		ENSMUSG00000031503	Col4a2	Proximal						ENSMUSG00000025364	Pa2g4	Proximal
ENSMUSG00000032411	Tfdp2	Proximal		ENSMUSG00000043872	Zmym1	Distal		ENSMUSG00000031504	Rab20	Distal						ENSMUSG00000025393	Atp5b	Distal
ENSMUSG00000032435	Dync1li1	Distal		ENSMUSG00000043998	Mgat2	Proximal		ENSMUSG00000031558	Slit2	Proximal						ENSMUSG00000025508	Rplp2	Proximal
ENSMUSG00000032449	Slc25a36	Proximal		ENSMUSG00000044447	Dock5	Distal		ENSMUSG00000031561	Tenm3	Proximal						ENSMUSG00000025764	Jade1	Proximal
ENSMUSG00000032494	Tdgf1	Proximal		ENSMUSG00000044533	Rps2	Proximal		ENSMUSG00000031618	Nr3c2	Proximal						ENSMUSG00000025794	Rpl14	Proximal
ENSMUSG00000032495	Lrrc2	Distal		ENSMUSG00000045128	Rpl18a	Distal		ENSMUSG00000031627	Irf2	Proximal						ENSMUSG00000025880	Smad7	Proximal
ENSMUSG00000032712	Resf1	Distal		ENSMUSG00000046062	Ppp1r15b	Proximal		ENSMUSG00000031654	Cbln1	Proximal						ENSMUSG00000025921	Rdh10	Distal
ENSMUSG00000033166	Dis3	Distal		ENSMUSG00000046364	Rpl27a	Proximal		ENSMUSG00000031661	Nkd1	Distal						ENSMUSG00000025967	Eef1b2	Proximal
ENSMUSG00000033222	Ttf2	Distal		ENSMUSG00000046434	Hnrnpa1	Proximal		ENSMUSG00000031673	Cdh11	Proximal						ENSMUSG00000025979	Mob4	Distal
ENSMUSG00000033237	Arid2	Distal		ENSMUSG00000046574	Prr12	Distal		ENSMUSG00000031688	Pou4f2	Proximal						ENSMUSG00000025980	Hspd1	Proximal
ENSMUSG00000033255	Gm5134	Distal		ENSMUSG00000047126	Cltc	Proximal		ENSMUSG00000031734	Irx3	Proximal						ENSMUSG00000026020	Nop58	Proximal
ENSMUSG00000033294	Noc4l	Distal		ENSMUSG00000047675	Rps8	Proximal		ENSMUSG00000031736	Crnde	Distal						ENSMUSG00000026021	Sumo1	Distal
ENSMUSG00000033307	Mif	Distal		ENSMUSG00000048109	Rbm15	Proximal		ENSMUSG00000031737	Irx5	Proximal						ENSMUSG00000026034	Clk1	Distal
ENSMUSG00000033318	Gstt2	Distal		ENSMUSG00000048546	Tob2	Distal		ENSMUSG00000031738	Irx6	Distal						ENSMUSG00000026035	Ppil3	Distal
ENSMUSG00000033863	Klf9	Distal		ENSMUSG00000048707	Tprn	Distal		ENSMUSG00000031849	Comp	Proximal						ENSMUSG00000026036	Nif3l1	Distal
ENSMUSG00000033916	Chmp2a	Distal		ENSMUSG00000048833	Slc39a9	Proximal		ENSMUSG00000031872	Bean1	Proximal						ENSMUSG00000026064	Ptp4a1	Distal
ENSMUSG00000033952	Aspm	Proximal		ENSMUSG00000049600	Zbtb45	Distal		ENSMUSG00000031963	Bmper	Proximal						ENSMUSG00000026193	Fn1	Proximal
ENSMUSG00000033967	Rnf225	Distal		ENSMUSG00000049751	Rpl36al	Proximal		ENSMUSG00000032033	Barx2	Proximal						ENSMUSG00000026234	Ncl	Proximal
ENSMUSG00000034154	Ino80	Proximal		ENSMUSG00000049932	H2ax	Proximal		ENSMUSG00000032034	Kcnj5	Distal						ENSMUSG00000026238	Ptma	Proximal
ENSMUSG00000034165	Ccnd3	Proximal		ENSMUSG00000050565	Tor1aip2	Proximal		ENSMUSG00000032356	Rasgrf1	Proximal						ENSMUSG00000026457	Adipor1	Distal
ENSMUSG00000034168	Irf2bpl	Distal		ENSMUSG00000050567	Maml1	Distal		ENSMUSG00000032368	Zic1	Proximal						ENSMUSG00000026480	Ncf2	Proximal
ENSMUSG00000034333	Zbed4	Distal		ENSMUSG00000051098	Mblac2	Distal		ENSMUSG00000032419	Tbx18	Proximal						ENSMUSG00000026500	Cox20	Proximal
ENSMUSG00000034391	Fbxo15	Proximal		ENSMUSG00000051184	Zfp524	Distal		ENSMUSG00000032446	Eomes	Proximal						ENSMUSG00000026701	Prdx6	Distal
ENSMUSG00000034460	Six4	Distal		ENSMUSG00000051234	Rnf7	Proximal		ENSMUSG00000032452	Clstn2	Proximal						ENSMUSG00000026708	Cenpl	Distal
ENSMUSG00000034645	Zyg11a	Proximal		ENSMUSG00000051705	Senp8	Distal		ENSMUSG00000032470	Mras	Distal						ENSMUSG00000026709	Dars2	Distal
ENSMUSG00000034868	Myl12b	Distal		ENSMUSG00000051735	Rinl	Distal		ENSMUSG00000032908	Sgpp2	Proximal						ENSMUSG00000026785	Pkn3	Proximal
ENSMUSG00000034987	Hrh2	Proximal		ENSMUSG00000051811	Cox6b2	Distal		ENSMUSG00000033016	Nfatc1	Proximal						ENSMUSG00000026791	Slc2a8	Distal
ENSMUSG00000034998	Foxn2	Distal		ENSMUSG00000052456	Get3	Distal		ENSMUSG00000033152	Podxl2	Distal						ENSMUSG00000026792	Lrsam1	Distal
ENSMUSG00000035104	Eva1a	Distal		ENSMUSG00000052566	Hook2	Distal		ENSMUSG00000033227	Wnt6	Distal						ENSMUSG00000026857	Ntmt1	Proximal
ENSMUSG00000035407	Kank4	Distal		ENSMUSG00000052837	Junb	Distal		ENSMUSG00000033350	Chst2	Proximal						ENSMUSG00000026965	Anapc2	Distal
ENSMUSG00000035697	Arhgap45	Distal		ENSMUSG00000052997	Uba2	Proximal		ENSMUSG00000033419	Snap91	Proximal						ENSMUSG00000026966	Ssna1	Distal
ENSMUSG00000035828	Pim3	Distal		ENSMUSG00000053565	Eif3k	Distal		ENSMUSG00000033717	Adra2a	Proximal						ENSMUSG00000027018	Hat1	Distal
ENSMUSG00000035842	Ddx11	Distal		ENSMUSG00000055184	Fam72a	Proximal		ENSMUSG00000033726	Emx1	Proximal						ENSMUSG00000027185	Nat10	Proximal
ENSMUSG00000035845	Alg12	Distal		ENSMUSG00000056962	Jmjd6	Proximal		ENSMUSG00000033730	Egr3	Proximal						ENSMUSG00000027405	Nop56	Proximal
ENSMUSG00000035873	Pawr	Distal		ENSMUSG00000057236	Rbbp4	Proximal		ENSMUSG00000033854	Kcnk10	Proximal						ENSMUSG00000027406	Idh3b	Proximal
ENSMUSG00000036036	Zfp57	Distal		ENSMUSG00000057342	Sphk2	Proximal		ENSMUSG00000034040	Galnt17	Proximal						ENSMUSG00000027422	Rrbp1	Distal
ENSMUSG00000036202	Rif1	Proximal		ENSMUSG00000057572	Zbtb8os	Proximal		ENSMUSG00000034324	Tmem132c	Proximal						ENSMUSG00000027423	Snx5	Proximal
ENSMUSG00000036356	Csgalnact1	Proximal		ENSMUSG00000058230	Arhgap35	Proximal		ENSMUSG00000034384	Barhl2	Proximal						ENSMUSG00000027424	Mgme1	Proximal
ENSMUSG00000036371	Serbp1	Distal		ENSMUSG00000058355	Abce1	Proximal		ENSMUSG00000034427	Myo15b	Proximal						ENSMUSG00000027547	Sall4	Distal
ENSMUSG00000036390	Gadd45a	Distal		ENSMUSG00000058385	H2bc8	Distal		ENSMUSG00000034435	Tmem30b	Distal						ENSMUSG00000027573	Gid8	Distal
ENSMUSG00000036430	Tbcc	Distal		ENSMUSG00000058638	Zfp110	Distal		ENSMUSG00000034486	Gbx2	Proximal						ENSMUSG00000027593	Raly	Distal
ENSMUSG00000036568	Bicral	Proximal		ENSMUSG00000059070	Rpl18	Proximal		ENSMUSG00000034684	Sema3f	Proximal						ENSMUSG00000027618	Nfs1	Proximal
ENSMUSG00000036986	Pml	Distal		ENSMUSG00000059119	Nap1l4	Proximal		ENSMUSG00000034777	Vax2	Proximal						ENSMUSG00000027620	Rbm39	Proximal
ENSMUSG00000037013	Ss18	Distal		ENSMUSG00000059355	Wdr83os	Distal		ENSMUSG00000034957	Cebpa	Proximal						ENSMUSG00000027678	Ncoa3	Distal
ENSMUSG00000037035	Inhbb	Distal		ENSMUSG00000059555	Tor4a	Distal		ENSMUSG00000034968	Lbx2	Distal						ENSMUSG00000027778	Ift80	Distal
ENSMUSG00000037070	Rbmxl1	Distal		ENSMUSG00000059851	Kmt5c	Distal		ENSMUSG00000035033	Tbr1	Proximal						ENSMUSG00000027937	Jtb	Distal
ENSMUSG00000037089	Slc35b2	Distal		ENSMUSG00000060038	Dhps	Proximal		ENSMUSG00000035187	Nkx6-1	Proximal						ENSMUSG00000028081	Rps3a1	Proximal
ENSMUSG00000037169	Mycn	Proximal		ENSMUSG00000060288	Ppih	Distal		ENSMUSG00000035277	Arx	Proximal						ENSMUSG00000028099	Polr3c	Distal
ENSMUSG00000037171	Nodal	Proximal		ENSMUSG00000060860	Ube2s	Proximal		ENSMUSG00000035403	Crb2	Distal						ENSMUSG00000028102	Pex11b	Distal
ENSMUSG00000037526	Atg14	Proximal		ENSMUSG00000061079	Zfp143	Proximal		ENSMUSG00000035451	Foxa1	Proximal						ENSMUSG00000028104	Polr3gl	Distal
ENSMUSG00000037643	Prkci	Distal		ENSMUSG00000061136	Prpf40a	Proximal		ENSMUSG00000035456	Prdm8	Proximal						ENSMUSG00000028234	Rps20	Proximal
ENSMUSG00000037692	Ahdc1	Distal		ENSMUSG00000061360	Phf5a	Distal		ENSMUSG00000035486	Plk5	Distal						ENSMUSG00000028333	Anp32b	Distal
ENSMUSG00000037730	Mynn	Distal		ENSMUSG00000061374	Fiz1	Distal		ENSMUSG00000035513	Ntng2	Proximal						ENSMUSG00000028334	Nans	Distal
ENSMUSG00000037737	Actrt3	Distal		ENSMUSG00000061787	Rps17	Proximal		ENSMUSG00000035781	R3hdm4	Proximal						ENSMUSG00000028495	Rps6	Proximal
ENSMUSG00000037815	Ctnna1	Distal		ENSMUSG00000061991	H2ac10	Proximal		ENSMUSG00000035799	Twist1	Proximal						ENSMUSG00000028560	Usp1	Distal
ENSMUSG00000037847	Nmrk1	Distal		ENSMUSG00000062270	Morf4l1	Proximal		ENSMUSG00000035946	Gsx2	Proximal						ENSMUSG00000028639	Ybx1	Distal
ENSMUSG00000037876	Jmjd1c	Proximal		ENSMUSG00000062328	Rpl17	Proximal		ENSMUSG00000035964	Tmem59l	Distal						ENSMUSG00000028641	P3h1	Distal
ENSMUSG00000037894	H2az1	Distal		ENSMUSG00000062590	Armc9	Distal		ENSMUSG00000036139	Hoxc9	Distal						ENSMUSG00000028645	Slc2a1	Proximal
ENSMUSG00000038010	Ccdc138	Proximal		ENSMUSG00000062683	Atp5g2	Proximal		ENSMUSG00000036158	Prickle1	Proximal						ENSMUSG00000028680	Plk3	Distal
ENSMUSG00000038172	Ttc39b	Distal		ENSMUSG00000063316	Rpl27	Proximal		ENSMUSG00000036225	Kctd1	Proximal						ENSMUSG00000028691	Prdx1	Proximal
ENSMUSG00000038286	Bphl	Distal		ENSMUSG00000063457	Rps15	Proximal		ENSMUSG00000036422	Pcdh8	Distal						ENSMUSG00000028692	Akr1a1	Distal
ENSMUSG00000038384	Setd1b	Proximal		ENSMUSG00000064844	Gm26202	Distal		ENSMUSG00000036545	Adamts2	Proximal						ENSMUSG00000028693	Nasp	Distal
ENSMUSG00000038437	Mllt6	Proximal		ENSMUSG00000064919	Gm22572	Distal		ENSMUSG00000036596	Cpz	Distal						ENSMUSG00000028811	Yars	Proximal
ENSMUSG00000038518	Jarid2	Distal		ENSMUSG00000065219	Snord32a	Distal		ENSMUSG00000036760	Kcnk9	Proximal						ENSMUSG00000028820	Sfpq	Proximal
ENSMUSG00000038587	Akap12	Proximal		ENSMUSG00000065818	Snord35a	Distal		ENSMUSG00000036867	Smad6	Proximal						ENSMUSG00000028868	Wasf2	Distal
ENSMUSG00000038612	Mcl1	Distal		ENSMUSG00000065878	Snord34	Distal		ENSMUSG00000036904	Fzd8	Proximal						ENSMUSG00000028893	Sesn2	Proximal
ENSMUSG00000038633	Degs1	Distal		ENSMUSG00000066232	Ipo7	Proximal		ENSMUSG00000036907	C1ql2	Proximal						ENSMUSG00000028896	Rcc1	Proximal
ENSMUSG00000038893	Fam117a	Distal		ENSMUSG00000068854	H2bc21	Distal		ENSMUSG00000036913	Trim67	Proximal						ENSMUSG00000028898	Trnau1ap	Distal
ENSMUSG00000038909	Kat7	Distal		ENSMUSG00000068856	Sf3b4	Distal		ENSMUSG00000036972	Zic4	Proximal						ENSMUSG00000028901	Gmeb1	Distal
ENSMUSG00000038914	Dido1	Proximal		ENSMUSG00000069268	H2bc7	Distal		ENSMUSG00000037025	Foxa2	Proximal						ENSMUSG00000028979	Masp2	Proximal
ENSMUSG00000038943	Prc1	Distal		ENSMUSG00000069272	H2ac8	Proximal		ENSMUSG00000037034	Pax1	Proximal						ENSMUSG00000029146	Snx17	Proximal
ENSMUSG00000039095	En2	Distal		ENSMUSG00000069305	H4c18	Proximal		ENSMUSG00000037206	Islr	Proximal						ENSMUSG00000029178	Klf3	Proximal
ENSMUSG00000039209	Rpl39l	Distal		ENSMUSG00000070392	Gm20634	Distal		ENSMUSG00000037335	Hand1	Proximal						ENSMUSG00000029199	Lias	Distal
ENSMUSG00000039395	Mreg	Proximal		ENSMUSG00000070697	Utp3	Proximal		ENSMUSG00000037605	Adgrl3	Proximal						ENSMUSG00000029203	Ube2k	Distal
ENSMUSG00000039477	Tnrc18	Distal		ENSMUSG00000070834	Gm13015	Distal		ENSMUSG00000037621	Atoh8	Proximal						ENSMUSG00000029326	Enoph1	Distal
ENSMUSG00000039497	Dse	Distal		ENSMUSG00000071072	Ptges3	Proximal		ENSMUSG00000037660	Gdf7	Proximal						ENSMUSG00000029328	Hnrnpdl	Proximal
ENSMUSG00000039518	Cdsn	Distal		ENSMUSG00000071478	H2ac7	Proximal		ENSMUSG00000037664	Cdkn1c	Proximal						ENSMUSG00000029405	G3bp2	Distal
ENSMUSG00000039542	Ncam1	Proximal		ENSMUSG00000071650	Ganab	Distal		ENSMUSG00000037708	Spag6	Proximal						ENSMUSG00000029430	Ran	Proximal
ENSMUSG00000039671	Zmynd8	Proximal		ENSMUSG00000071652	Ints5	Distal		ENSMUSG00000037736	Limch1	Distal						ENSMUSG00000029446	Psph	Distal
ENSMUSG00000039910	Cited2	Distal		ENSMUSG00000071657	Bscl2	Distal		ENSMUSG00000037771	Slc32a1	Proximal						ENSMUSG00000029447	Cct6a	Proximal
ENSMUSG00000039968	Rsbn1l	Distal		ENSMUSG00000071658	Gng3	Distal		ENSMUSG00000037868	Egr2	Proximal						ENSMUSG00000029580	Actb	Proximal
ENSMUSG00000039985	Sinhcaf	Distal		ENSMUSG00000071659	Hnrnpul2	Proximal		ENSMUSG00000037989	Wnk2	Distal						ENSMUSG00000029614	Rpl6	Proximal
ENSMUSG00000039987	Phtf2	Distal		ENSMUSG00000071660	Ttc9c	Distal		ENSMUSG00000037990	Sh3rf3	Proximal						ENSMUSG00000029640	Usp12	Distal
ENSMUSG00000040016	Ptger3	Distal		ENSMUSG00000071661	Zbtb3	Distal		ENSMUSG00000038009	Dnajc22	Distal						ENSMUSG00000029642	Polr1d	Distal
ENSMUSG00000040209	Zfp704	Distal		ENSMUSG00000072082	Ccnf	Proximal		ENSMUSG00000038077	Kcna6	Distal						ENSMUSG00000029730	Mcm7	Distal
ENSMUSG00000040312	Cchcr1	Distal		ENSMUSG00000072582	Ptrh2	Distal		ENSMUSG00000038152	5033430I15Rik	Proximal						ENSMUSG00000029814	Igf2bp3	Distal
ENSMUSG00000040430	Pitpnc1	Proximal		ENSMUSG00000073147	5031425E22Rik	Distal		ENSMUSG00000038193	Hand2	Proximal						ENSMUSG00000029817	Tra2a	Distal
ENSMUSG00000040451	Sgms1	Proximal		ENSMUSG00000073422	H2-Ke6	Distal		ENSMUSG00000038203	Hoxa13	Proximal						ENSMUSG00000029836	Cbx3	Distal
ENSMUSG00000040594	Ranbp17	Distal		ENSMUSG00000073627	C130036L24Rik	Distal		ENSMUSG00000038236	Hoxa7	Distal						ENSMUSG00000029922	Mkrn1	Proximal
ENSMUSG00000040616	Tmem51	Proximal		ENSMUSG00000073771	Btbd19	Distal		ENSMUSG00000038248	Sobp	Proximal						ENSMUSG00000029924	Slc37a3	Distal
ENSMUSG00000040669	Phc1	Proximal		ENSMUSG00000073838	Tufm	Distal		ENSMUSG00000038253	Hoxa5	Distal						ENSMUSG00000030055	Rab43	Distal
ENSMUSG00000040675	Mthfd1l	Distal		ENSMUSG00000074129	Rpl13a	Distal		ENSMUSG00000038255	Neurod2	Proximal						ENSMUSG00000030056	Isy1	Proximal
ENSMUSG00000040721	Zfhx2	Distal		ENSMUSG00000074141	Il4i1	Proximal		ENSMUSG00000038280	Ostm1	Proximal						ENSMUSG00000030057	Cnbp	Proximal
ENSMUSG00000040761	Spen	Distal		ENSMUSG00000074794	Arrdc3	Proximal		ENSMUSG00000038331	Satb2	Proximal						ENSMUSG00000030319	Cand2	Proximal
ENSMUSG00000040850	Psme4	Distal		ENSMUSG00000075528	Aarsd1	Distal		ENSMUSG00000038402	Foxf2	Proximal						ENSMUSG00000030335	Mrpl51	Distal
ENSMUSG00000041075	Fzd7	Distal		ENSMUSG00000078201	Tmem203	Distal		ENSMUSG00000038408	1700018A04Rik	Distal						ENSMUSG00000030431	Tmem238	Distal
ENSMUSG00000041193	Pla2g5	Distal		ENSMUSG00000078578	Ube2d3	Proximal		ENSMUSG00000038415	Foxq1	Proximal						ENSMUSG00000030432	Rpl28	Proximal
ENSMUSG00000041220	Elovl6	Proximal		ENSMUSG00000079445	B3gnt7	Distal		ENSMUSG00000038692	Hoxb4	Proximal						ENSMUSG00000030609	Aen	Proximal
ENSMUSG00000041346	Wrap53	Proximal		ENSMUSG00000079471	Mymx	Distal		ENSMUSG00000038700	Hoxb5	Proximal						ENSMUSG00000030654	Arl6ip1	Distal
ENSMUSG00000041351	Rap1gap	Distal		ENSMUSG00000081058	H3c15	Proximal		ENSMUSG00000038721	Hoxb7	Distal						ENSMUSG00000030655	Smg1	Distal
ENSMUSG00000041355	Ssr2	Proximal		ENSMUSG00000084149	Gm12944	Distal		ENSMUSG00000038765	Lmx1b	Distal						ENSMUSG00000030662	Ipo5	Distal
ENSMUSG00000041483	Zfp281	Distal		ENSMUSG00000084686	Gm22027	Distal		ENSMUSG00000038805	Six3	Proximal						ENSMUSG00000030677	Kif22	Distal
ENSMUSG00000041598	Cdc42ep4	Distal		ENSMUSG00000087377	AV099323	Proximal		ENSMUSG00000039081	Zfp503	Proximal						ENSMUSG00000030678	Maz	Distal
ENSMUSG00000041623	D11Wsu47e	Distal		ENSMUSG00000090266	Mettl23	Proximal		ENSMUSG00000039095	En2	Proximal						ENSMUSG00000030681	Mvp	Distal
ENSMUSG00000041629	Fam104a	Distal		ENSMUSG00000093577	Gm20632	Proximal		ENSMUSG00000039114	Nrn1	Proximal						ENSMUSG00000030733	Sh2b1	Distal
ENSMUSG00000041703	Zic5	Distal		ENSMUSG00000093904	Tomm20	Proximal		ENSMUSG00000039257	Vstm2b	Proximal						ENSMUSG00000030744	Rps3	Proximal
ENSMUSG00000041718	Alg13	Proximal		ENSMUSG00000094248	H2ac23	Proximal		ENSMUSG00000039377	Hlx	Proximal						ENSMUSG00000030793	Pycard	Proximal
ENSMUSG00000041773	Enc1	Distal		ENSMUSG00000096370	Gm21992	Proximal		ENSMUSG00000039410	Prdm16	Proximal						ENSMUSG00000030795	Fus	Proximal
ENSMUSG00000042207	Kdm5b	Distal		ENSMUSG00000097121	D130020L05Rik	Proximal		ENSMUSG00000039477	Tnrc18	Proximal						ENSMUSG00000030801	Kat8	Distal
ENSMUSG00000042229	Rabif	Distal		ENSMUSG00000099583	H3c4	Proximal		ENSMUSG00000039809	Gabbr2	Proximal						ENSMUSG00000030825	Hsd17b14	Distal
ENSMUSG00000042367	Gjb3	Distal		ENSMUSG00000103103	4833445I07Rik	Proximal		ENSMUSG00000039903	Eva1c	Proximal						ENSMUSG00000030849	Fgfr2	Proximal
ENSMUSG00000042401	Crtac1	Proximal		ENSMUSG00000109511	Nup62	Proximal		ENSMUSG00000039989	Cbx4	Proximal						ENSMUSG00000030970	Ctbp2	Proximal
ENSMUSG00000042410	Agps	Proximal		ENSMUSG00000109904	Gm45819	Proximal		ENSMUSG00000040007	Bahd1	Distal						ENSMUSG00000031024	Denn2b	Distal
ENSMUSG00000042462	Dctpp1	Distal		ENSMUSG00000110279	Gm45552	Proximal		ENSMUSG00000040035	Disp2	Distal						ENSMUSG00000031077	Fadd	Distal
ENSMUSG00000042492	Tbc1d10b	Distal		ENSMUSG00000116780	Dynlt2a3	Proximal		ENSMUSG00000040148	Hmx3	Proximal						ENSMUSG00000031490	Eif4ebp1	Proximal
ENSMUSG00000042502	Cd2bp2	Distal		ENSMUSG00000116895	Gm3435	Proximal		ENSMUSG00000040310	Alx4	Proximal						ENSMUSG00000031578	Mak16	Distal
ENSMUSG00000042572	Ube2q1	Distal		ENSMUSG00000116953	9030025P20Rik	Proximal		ENSMUSG00000040478	Prdm13	Proximal						ENSMUSG00000031652	N4bp1	Proximal
ENSMUSG00000042579	4632404H12Rik	Distal		ENSMUSG00000117768	8030456M14Rik	Proximal		ENSMUSG00000040610	Tlx3	Proximal						ENSMUSG00000031671	Setd6	Proximal
ENSMUSG00000042677	Zc3h12a	Distal						ENSMUSG00000040797	Iqsec3	Proximal						ENSMUSG00000031691	Tnpo2	Proximal
ENSMUSG00000042688	Mapk6	Proximal						ENSMUSG00000040896	Kcnd3	Proximal						ENSMUSG00000031701	Dnaja2	Distal
ENSMUSG00000042708	Shcbp1l	Distal						ENSMUSG00000041078	Grid1	Proximal						ENSMUSG00000031834	Pik3r2	Distal
ENSMUSG00000042751	Nmnat2	Proximal						ENSMUSG00000041120	Nbl1	Distal						ENSMUSG00000031916	Cog8	Proximal
ENSMUSG00000042772	Smg7	Distal						ENSMUSG00000041309	Nkx6-2	Proximal						ENSMUSG00000031917	Nip7	Distal
ENSMUSG00000043257	Pigv	Proximal						ENSMUSG00000041592	Sdk2	Proximal						ENSMUSG00000031938	4931406C07Rik	Proximal
ENSMUSG00000043323	Fbrsl1	Distal						ENSMUSG00000041703	Zic5	Distal						ENSMUSG00000031939	Taf1d	Proximal
ENSMUSG00000043411	Usp48	Proximal						ENSMUSG00000041911	Dlx1	Proximal						ENSMUSG00000032112	Trappc4	Proximal
ENSMUSG00000043488	Frmd8os	Proximal						ENSMUSG00000041923	Nol4	Proximal						ENSMUSG00000032115	Hyou1	Distal
ENSMUSG00000043991	Pura	Distal						ENSMUSG00000042359	Osbpl6	Proximal						ENSMUSG00000032123	Dpagt1	Distal
ENSMUSG00000044037	Als2cl	Distal						ENSMUSG00000042372	Dmrt3	Proximal						ENSMUSG00000032185	Carm1	Proximal
ENSMUSG00000044066	Cep68	Proximal						ENSMUSG00000042417	Ccno	Proximal						ENSMUSG00000032254	Kif23	Distal
ENSMUSG00000044320	1700001O22Rik	Distal						ENSMUSG00000042514	Klhl14	Proximal						ENSMUSG00000032333	Stoml1	Distal
ENSMUSG00000044387	2410080I02Rik	Proximal						ENSMUSG00000042540	Acot5	Proximal						ENSMUSG00000032346	Ooep	Distal
ENSMUSG00000044813	Shb	Proximal						ENSMUSG00000042596	Tfap2d	Distal						ENSMUSG00000032399	Rpl4	Proximal
ENSMUSG00000045005	Fzd5	Proximal						ENSMUSG00000042812	Foxf1	Proximal						ENSMUSG00000032518	Rpsa	Proximal
ENSMUSG00000045216	Hs6st1	Distal						ENSMUSG00000042961	Egflam	Distal						ENSMUSG00000032637	Atxn2l	Distal
ENSMUSG00000045435	Tmem60	Distal						ENSMUSG00000043013	Onecut1	Proximal						ENSMUSG00000032905	Atg12	Distal
ENSMUSG00000045691	Thtpa	Proximal						ENSMUSG00000043051	Disc1	Proximal						ENSMUSG00000033166	Dis3	Distal
ENSMUSG00000045699	Gm21411	Proximal						ENSMUSG00000043099	Hic1	Proximal						ENSMUSG00000033184	Tmed7	Distal
ENSMUSG00000045867	Cradd	Distal						ENSMUSG00000043168	4930426D05Rik	Proximal						ENSMUSG00000033658	Ddx19b	Distal
ENSMUSG00000046623	Gjb4	Distal						ENSMUSG00000043313	Pcdhb19	Distal						ENSMUSG00000033863	Klf9	Distal
ENSMUSG00000046909	Tefm	Distal						ENSMUSG00000043342	Hoxd9	Distal						ENSMUSG00000033916	Chmp2a	Proximal
ENSMUSG00000047281	Sfn	Distal						ENSMUSG00000043391	2510009E07Rik	Proximal						ENSMUSG00000033931	Rbm34	Distal
ENSMUSG00000047407	Tgif1	Distal						ENSMUSG00000043456	Zfp536	Proximal						ENSMUSG00000033961	Zfp446	Distal
ENSMUSG00000047412	Zbtb44	Distal						ENSMUSG00000043460	Elfn2	Proximal						ENSMUSG00000033967	Rnf225	Proximal
ENSMUSG00000047751	Utf1	Proximal						ENSMUSG00000043496	Tril	Proximal						ENSMUSG00000034317	Trim59	Proximal
ENSMUSG00000048402	Gli2	Distal						ENSMUSG00000043557	Mdga1	Proximal						ENSMUSG00000034333	Zbed4	Distal
ENSMUSG00000048677	Tpcn2	Distal						ENSMUSG00000043969	Emx2	Proximal						ENSMUSG00000034349	Smc4	Distal
ENSMUSG00000048897	Zfp710	Distal						ENSMUSG00000044220	Nkx2-3	Proximal						ENSMUSG00000034595	Ppp1r18	Distal
ENSMUSG00000049422	Chchd10	Distal						ENSMUSG00000044352	Sowaha	Proximal						ENSMUSG00000034854	Mfsd12	Proximal
ENSMUSG00000049555	Tmie	Distal						ENSMUSG00000044518	Foxe3	Proximal						ENSMUSG00000034881	Tbxa2r	Distal
ENSMUSG00000049600	Zbtb45	Distal						ENSMUSG00000044646	Zbtb7c	Proximal						ENSMUSG00000034889	Cactin	Distal
ENSMUSG00000049932	H2ax	Proximal						ENSMUSG00000044674	Fzd1	Proximal						ENSMUSG00000034892	Rps29	Proximal
ENSMUSG00000049969	Plekhf2	Distal						ENSMUSG00000045008	9030612E09Rik	Distal						ENSMUSG00000034902	Pip5k1c	Distal
ENSMUSG00000050052	Tdrp	Distal						ENSMUSG00000045053	Kcng3	Proximal						ENSMUSG00000034917	Tjp3	Distal
ENSMUSG00000050410	Tcf19	Distal						ENSMUSG00000045287	Rtn4rl1	Proximal						ENSMUSG00000034932	Mrpl54	Distal
ENSMUSG00000050917	Fgf4	Proximal						ENSMUSG00000045318	Adra2c	Proximal						ENSMUSG00000034958	Atcay	Distal
ENSMUSG00000051176	Zfp42	Distal						ENSMUSG00000045440	Insm2	Proximal						ENSMUSG00000034974	Dapk3	Distal
ENSMUSG00000051243	Islr2	Distal						ENSMUSG00000045493	Bhlhe23	Proximal						ENSMUSG00000034994	Eef2	Proximal
ENSMUSG00000051391	Ywhag	Proximal						ENSMUSG00000045515	Pou3f3	Distal						ENSMUSG00000035011	Zbtb7a	Proximal
ENSMUSG00000051650	B3gnt2	Distal						ENSMUSG00000045518	Onecut3	Proximal						ENSMUSG00000035041	Creb3l3	Distal
ENSMUSG00000052105	Mtcl1	Distal						ENSMUSG00000045532	C1ql1	Proximal						ENSMUSG00000035367	Rmi1	Distal
ENSMUSG00000052488	Cherp	Distal						ENSMUSG00000045591	Olig3	Proximal						ENSMUSG00000035530	Eif1	Proximal
ENSMUSG00000052997	Uba2	Proximal						ENSMUSG00000045680	Tcf21	Distal						ENSMUSG00000035545	Leng8	Distal
ENSMUSG00000053062	Jam2	Proximal						ENSMUSG00000045991	Onecut2	Proximal						ENSMUSG00000035585	Tsen34	Distal
ENSMUSG00000053113	Socs3	Distal						ENSMUSG00000046387	Pcdhb17	Distal						ENSMUSG00000035595	Fam174c	Distal
ENSMUSG00000053560	Ier2	Distal						ENSMUSG00000046413	Irx3os	Proximal						ENSMUSG00000035596	Mboat7	Distal
ENSMUSG00000054716	Zfp771	Distal						ENSMUSG00000046480	Scn4b	Proximal						ENSMUSG00000035621	Midn	Distal
ENSMUSG00000055148	Klf2	Distal						ENSMUSG00000046607	Hrk	Proximal						ENSMUSG00000035632	Cnot3	Distal
ENSMUSG00000056167	Cnot10	Distal						ENSMUSG00000046688	Tifa	Distal						ENSMUSG00000035640	Cbarp	Distal
ENSMUSG00000056458	Mok	Proximal						ENSMUSG00000046714	Foxc2	Proximal						ENSMUSG00000035673	Sbno2	Distal
ENSMUSG00000056608	Chd9	Proximal						ENSMUSG00000046876	Atxn1	Proximal						ENSMUSG00000035697	Arhgap45	Distal
ENSMUSG00000057098	Ebf1	Proximal						ENSMUSG00000047033	Pcdhb15	Distal						ENSMUSG00000035828	Pim3	Proximal
ENSMUSG00000057729	Prtn3	Distal						ENSMUSG00000047143	Dmrta2	Proximal						ENSMUSG00000035960	Apex1	Proximal
ENSMUSG00000058028	Zscan5b	Distal						ENSMUSG00000047171	Helt	Proximal						ENSMUSG00000036026	Tmem63b	Distal
ENSMUSG00000058186	Zfp980	Proximal						ENSMUSG00000047414	Flrt2	Proximal						ENSMUSG00000036036	Zfp57	Proximal
ENSMUSG00000058440	Nrf1	Distal						ENSMUSG00000047759	Hs3st3a1	Proximal						ENSMUSG00000036181	H1f2	Proximal
ENSMUSG00000059182	Skap2	Distal						ENSMUSG00000047910	Pcdhb16	Distal						ENSMUSG00000036202	Rif1	Distal
ENSMUSG00000059479	B3gnt8	Distal						ENSMUSG00000047976	Kcna1	Proximal						ENSMUSG00000036214	Polr1has	Distal
ENSMUSG00000059552	Trp53	Proximal						ENSMUSG00000047992	Dipk1c	Proximal						ENSMUSG00000036315	Polr1h	Distal
ENSMUSG00000059796	Eif4a1	Distal						ENSMUSG00000048001	Hes5	Distal						ENSMUSG00000036398	Ppp1r11	Distal
ENSMUSG00000059995	Atxn7l3	Distal						ENSMUSG00000048138	Dmrt2	Proximal						ENSMUSG00000036430	Tbcc	Distal
ENSMUSG00000060461	Dppa5a	Proximal						ENSMUSG00000048142	Nat8l	Proximal						ENSMUSG00000036473	Tbc1d24	Distal
ENSMUSG00000060671	Atp8b2	Distal						ENSMUSG00000048251	Bcl11b	Proximal						ENSMUSG00000036550	Cnot1	Distal
ENSMUSG00000061524	Zic2	Distal						ENSMUSG00000048347	Pcdhb18	Distal						ENSMUSG00000036731	Cysrt1	Distal
ENSMUSG00000062300	Nectin2	Proximal						ENSMUSG00000048450	Msx1	Proximal						ENSMUSG00000036752	Tubb4b	Proximal
ENSMUSG00000062542	Syt9	Distal						ENSMUSG00000048528	Nkx1-2	Proximal						ENSMUSG00000036820	Amdhd2	Distal
ENSMUSG00000063524	Eno1	Proximal						ENSMUSG00000048562	Sp8	Proximal						ENSMUSG00000036875	Dna2	Distal
ENSMUSG00000063888	Rpl7l1	Distal						ENSMUSG00000048763	Hoxb3	Proximal						ENSMUSG00000036986	Pml	Proximal
ENSMUSG00000065734	Snord49a	Distal						ENSMUSG00000048904	Neurog1	Proximal						ENSMUSG00000036990	Otud4	Proximal
ENSMUSG00000066000	Zfp979	Proximal						ENSMUSG00000048915	Efna5	Proximal						ENSMUSG00000037058	Paip2	Proximal
ENSMUSG00000066319	Rtp3	Distal						ENSMUSG00000048988	Elfn1	Proximal						ENSMUSG00000037089	Slc35b2	Proximal
ENSMUSG00000066652	Lefty2	Proximal						ENSMUSG00000049001	Ndnf	Proximal						ENSMUSG00000037171	Nodal	Proximal
ENSMUSG00000066894	Vsig10	Distal						ENSMUSG00000049100	Pcdh10	Proximal						ENSMUSG00000037236	Matr3	Distal
ENSMUSG00000068040	Tm9sf4	Proximal						ENSMUSG00000049511	Htr1b	Proximal						ENSMUSG00000037552	Plekhg2	Distal
ENSMUSG00000068566	Myadm	Distal						ENSMUSG00000049604	Hoxb13	Distal						ENSMUSG00000037563	Rps16	Proximal
ENSMUSG00000068601	Gm10244	Distal						ENSMUSG00000049641	Vgll2	Proximal						ENSMUSG00000037649	H2-DMa	Proximal
ENSMUSG00000069769	Msi2	Proximal						ENSMUSG00000050100	Hmx2	Proximal						ENSMUSG00000037692	Ahdc1	Distal
ENSMUSG00000070291	Ddx43	Distal						ENSMUSG00000050138	Kcnk12	Proximal						ENSMUSG00000037805	Rpl10a	Proximal
ENSMUSG00000070348	Ccnd1	Distal						ENSMUSG00000050288	Fzd2	Proximal						ENSMUSG00000037894	H2az1	Proximal
ENSMUSG00000072688	Gm10399	Distal						ENSMUSG00000050295	Foxc1	Proximal						ENSMUSG00000038252	Ncapd2	Distal
ENSMUSG00000072754	Lrcol1	Distal						ENSMUSG00000050397	Foxl2	Distal						ENSMUSG00000038271	Iffo1	Proximal
ENSMUSG00000072872	Rybp	Distal						ENSMUSG00000050473	Slc35d3	Proximal						ENSMUSG00000038279	Nop2	Distal
ENSMUSG00000073627	C130036L24Rik	Distal						ENSMUSG00000050896	Rtn4rl2	Proximal						ENSMUSG00000038374	Rbm8a	Distal
ENSMUSG00000073633	Fbxo36	Proximal						ENSMUSG00000051154	Commd3	Proximal						ENSMUSG00000038393	Txnip	Proximal
ENSMUSG00000073652	Apol7d	Distal						ENSMUSG00000051236	Msrb3	Distal						ENSMUSG00000038500	Prr3	Distal
ENSMUSG00000073728	Tmem51os1	Distal						ENSMUSG00000051243	Islr2	Distal						ENSMUSG00000038502	Ptov1	Distal
ENSMUSG00000073894	Rbmxl2	Distal						ENSMUSG00000051279	Gdf6	Proximal						ENSMUSG00000038520	Tbc1d17	Distal
ENSMUSG00000074088	Snrnp40	Distal						ENSMUSG00000051367	Six1	Proximal						ENSMUSG00000038612	Mcl1	Proximal
ENSMUSG00000074212	Dnajb14	Distal						ENSMUSG00000051375	Pcdh1	Proximal						ENSMUSG00000038619	Ensa	Distal
ENSMUSG00000074480	Mex3a	Distal						ENSMUSG00000051490	Foxd4	Distal						ENSMUSG00000038762	Abcf1	Distal
ENSMUSG00000074637	Sox2	Distal						ENSMUSG00000051844	B230319C09Rik	Distal						ENSMUSG00000038806	Sde2	Distal
ENSMUSG00000074653	Lrrc31	Distal						ENSMUSG00000051910	Sox6	Proximal						ENSMUSG00000038900	Rpl12	Proximal
ENSMUSG00000074736	Syndig1	Proximal						ENSMUSG00000052133	Sema5b	Proximal						ENSMUSG00000038914	Dido1	Proximal
ENSMUSG00000075706	Gpx4	Proximal						ENSMUSG00000052188	Gm14964	Distal						ENSMUSG00000038975	Rabggtb	Distal
ENSMUSG00000077457	Snord65	Distal						ENSMUSG00000052920	Prkg1	Proximal						ENSMUSG00000038990	Cables2	Distal
ENSMUSG00000078497	Zfp978	Proximal						ENSMUSG00000052942	Glis3	Proximal						ENSMUSG00000039001	Rps21	Proximal
ENSMUSG00000078498	Zfp988	Proximal						ENSMUSG00000052951	C130021I20Rik	Distal						ENSMUSG00000039041	Adrm1	Distal
ENSMUSG00000078500	Zfp986	Proximal						ENSMUSG00000053007	Creb5	Proximal						ENSMUSG00000039220	Ppp1r10	Proximal
ENSMUSG00000078578	Ube2d3	Distal						ENSMUSG00000053129	Gsx1	Proximal						ENSMUSG00000039323	Igfbp2	Distal
ENSMUSG00000078815	Cacng6	Distal						ENSMUSG00000053166	Cdh22	Proximal						ENSMUSG00000039630	Hnrnpu	Proximal
ENSMUSG00000078816	Prkcg	Distal						ENSMUSG00000053545	6430503K07Rik	Distal						ENSMUSG00000039656	Rxrb	Distal
ENSMUSG00000079259	Trim71	Distal						ENSMUSG00000053552	Ebf4	Proximal						ENSMUSG00000039671	Zmynd8	Proximal
ENSMUSG00000079445	B3gnt7	Distal						ENSMUSG00000053702	Nebl	Proximal						ENSMUSG00000039720	Got1l1	Distal
ENSMUSG00000079471	Mymx	Distal						ENSMUSG00000053747	Sox14	Proximal						ENSMUSG00000039763	Dnajc28	Distal
ENSMUSG00000079737	3110001I22Rik	Distal						ENSMUSG00000054057	A930004D18Rik	Distal						ENSMUSG00000039810	Zc3h10	Proximal
ENSMUSG00000083300	Gm12309	Distal						ENSMUSG00000054074	Skida1	Distal						ENSMUSG00000039824	Myl6b	Distal
ENSMUSG00000085586	Gm11613	Proximal						ENSMUSG00000054252	Fgfr3	Proximal						ENSMUSG00000039852	Rere	Distal
ENSMUSG00000086147	Zfp989	Proximal						ENSMUSG00000054423	Cadps	Distal						ENSMUSG00000039994	Timeless	Distal
ENSMUSG00000097760	6030442K20Rik	Proximal						ENSMUSG00000055078	Gabra5	Proximal						ENSMUSG00000040010	Slc7a5	Distal
ENSMUSG00000100865	Gm9320	Proximal						ENSMUSG00000055197	Fev	Proximal						ENSMUSG00000040025	Ythdf2	Distal
ENSMUSG00000111149	Gm26564	Proximal						ENSMUSG00000055210	Foxd2	Distal						ENSMUSG00000040054	Baz2a	Distal
								ENSMUSG00000055254	Ntrk2	Proximal						ENSMUSG00000040365	Trim41	Distal
								ENSMUSG00000055435	Maf	Proximal						ENSMUSG00000040463	Mybbp1a	Proximal
								ENSMUSG00000055732	Gm9979	Proximal						ENSMUSG00000040471	Ggt6	Distal
								ENSMUSG00000055945	Prr18	Distal						ENSMUSG00000040594	Ranbp17	Distal
								ENSMUSG00000055958	Gm9987	Distal						ENSMUSG00000040688	Tbl3	Distal
								ENSMUSG00000056445	Hoxaas2	Distal						ENSMUSG00000040721	Zfhx2	Proximal
								ENSMUSG00000056648	Hoxb8	Proximal						ENSMUSG00000040865	Ino80d	Distal
								ENSMUSG00000056758	Hmga2	Proximal						ENSMUSG00000040888	Gfer	Distal
								ENSMUSG00000056856	Jakmip3	Proximal						ENSMUSG00000040940	Arhgef1	Distal
								ENSMUSG00000056947	Mab21l1	Distal						ENSMUSG00000040952	Rps19	Distal
								ENSMUSG00000057098	Ebf1	Distal						ENSMUSG00000041164	Zmiz2	Distal
								ENSMUSG00000057406	Nsd2	Distal						ENSMUSG00000041168	Lonp1	Distal
								ENSMUSG00000057706	Mex3b	Distal						ENSMUSG00000041287	Sox15	Distal
								ENSMUSG00000057751	Megf6	Distal						ENSMUSG00000041319	Thoc6	Distal
								ENSMUSG00000058571	Gpc6	Distal						ENSMUSG00000041453	Rpl21	Proximal
								ENSMUSG00000058665	En1	Distal						ENSMUSG00000041459	Tardbp	Proximal
								ENSMUSG00000058669	Nkx2-9	Distal						ENSMUSG00000041471	Shld2	Distal
								ENSMUSG00000059213	Ddn	Distal						ENSMUSG00000041506	Rrp9	Distal
								ENSMUSG00000059246	Foxb1	Distal						ENSMUSG00000041638	Gcn1	Proximal
								ENSMUSG00000059741	Myl3	Distal						ENSMUSG00000041773	Enc1	Distal
								ENSMUSG00000060424	Pantr1	Distal						ENSMUSG00000041841	Rpl37	Proximal
								ENSMUSG00000060969	Irx1	Distal						ENSMUSG00000041859	Mcm3	Distal
								ENSMUSG00000061024	Rrs1	Distal						ENSMUSG00000041881	Ndufa7	Distal
								ENSMUSG00000061143	Maml3	Distal						ENSMUSG00000042073	Abhd14b	Distal
								ENSMUSG00000061517	Sox21	Distal						ENSMUSG00000042087	4933440N22Rik	Distal
								ENSMUSG00000061524	Zic2	Distal						ENSMUSG00000042099	Kank3	Proximal
								ENSMUSG00000061718	Ppp1r1b	Distal						ENSMUSG00000042207	Kdm5b	Distal
								ENSMUSG00000062327	T	Distal						ENSMUSG00000042210	Abhd14a	Distal
								ENSMUSG00000062432	Cyp26c1	Distal						ENSMUSG00000042229	Rabif	Distal
								ENSMUSG00000062866	Phactr2	Distal						ENSMUSG00000042348	Arl15	Distal
								ENSMUSG00000063415	Cyp26b1	Distal						ENSMUSG00000042354	Gnl3	Proximal
								ENSMUSG00000063760	Rnf217	Distal						ENSMUSG00000042364	Snx18	Distal
								ENSMUSG00000064052	Gm5089	Distal						ENSMUSG00000042406	Atf4	Proximal
								ENSMUSG00000066607	Insyn1	Distal						ENSMUSG00000042419	Nfkbil1	Distal
								ENSMUSG00000066687	Zbtb16	Distal						ENSMUSG00000042625	Safb2	Distal
								ENSMUSG00000066979	Bub3	Distal						ENSMUSG00000042677	Zc3h12a	Proximal
								ENSMUSG00000067438	Hmx1	Distal						ENSMUSG00000042699	Dhx9	Proximal
								ENSMUSG00000068154	Insm1	Distal						ENSMUSG00000042708	Shcbp1l	Proximal
								ENSMUSG00000068859	Sp9	Distal						ENSMUSG00000042719	Naa25	Distal
								ENSMUSG00000069171	Nr2f1	Distal						ENSMUSG00000042772	Smg7	Distal
								ENSMUSG00000069378	Prdm6	Distal						ENSMUSG00000043059	Zfp513	Proximal
								ENSMUSG00000070498	Tmem132b	Distal						ENSMUSG00000043091	Tuba1c	Proximal
								ENSMUSG00000070720	Tmem200b	Distal						ENSMUSG00000043311	D17H6S53E	Distal
								ENSMUSG00000070990	Foxe1	Distal						ENSMUSG00000043467	Zbtb37	Distal
								ENSMUSG00000071341	Egr4	Distal						ENSMUSG00000043488	Frmd8os	Distal
								ENSMUSG00000072214	Septin5	Distal						ENSMUSG00000043681	Fam25c	Distal
								ENSMUSG00000072769	Gm10419	Distal						ENSMUSG00000043716	Rpl7	Distal
								ENSMUSG00000072875	Gpr27	Distal						ENSMUSG00000043747	1520401A03Rik	Distal
								ENSMUSG00000073591	Pcdhb22	Distal						ENSMUSG00000043923	Ccdc84	Distal
								ENSMUSG00000074203	G430095P16Rik	Distal						ENSMUSG00000044122	Proca1	Distal
								ENSMUSG00000074622	Mafb	Distal						ENSMUSG00000044387	2410080I02Rik	Distal
								ENSMUSG00000074651	Mcidas	Distal						ENSMUSG00000044533	Rps2	Proximal
								ENSMUSG00000074912	Gm14207	Distal						ENSMUSG00000044628	Rnf208	Distal
								ENSMUSG00000074916	Chst14	Distal						ENSMUSG00000044786	Zfp36	Distal
								ENSMUSG00000074918	Inafm2	Distal						ENSMUSG00000045005	Fzd5	Proximal
								ENSMUSG00000075304	Sp5	Distal						ENSMUSG00000045128	Rpl18a	Proximal
								ENSMUSG00000075335	4930588K23Rik	Distal						ENSMUSG00000045193	Cirbp	Distal
								ENSMUSG00000075588	Hoxb2	Distal						ENSMUSG00000045216	Hs6st1	Proximal
								ENSMUSG00000075707	Dio3	Distal						ENSMUSG00000045327	6330549D23Rik	Distal
								ENSMUSG00000078302	Foxd1	Distal						ENSMUSG00000045598	Zfp553	Proximal
								ENSMUSG00000079466	Prdm12	Distal						ENSMUSG00000045659	Plekha7	Distal
								ENSMUSG00000079560	Hoxa3	Distal						ENSMUSG00000045691	Thtpa	Distal
																ENSMUSG00000046330	Rpl37a	Proximal
																ENSMUSG00000046364	Rpl27a	Proximal
																ENSMUSG00000046434	Hnrnpa1	Proximal
																ENSMUSG00000046574	Prr12	Distal
																ENSMUSG00000046679	C87436	Distal
																ENSMUSG00000046711	Hmga1	Proximal
																ENSMUSG00000047215	Rpl9	Proximal
																ENSMUSG00000047284	Neurl4	Distal
																ENSMUSG00000047407	Tgif1	Distal
																ENSMUSG00000047675	Rps8	Proximal
																ENSMUSG00000047714	Ppp1r2	Distal
																ENSMUSG00000047898	Ccr4	Proximal
																ENSMUSG00000048012	Zfp473	Distal
																ENSMUSG00000048154	Kmt2d	Distal
																ENSMUSG00000048429	Timm29	Proximal
																ENSMUSG00000048707	Tprn	Distal
																ENSMUSG00000048758	Rpl29	Proximal
																ENSMUSG00000049295	Zfp219	Distal
																ENSMUSG00000049401	Ogfr	Distal
																ENSMUSG00000049539	H1f1	Proximal
																ENSMUSG00000049600	Zbtb45	Distal
																ENSMUSG00000049760	Micos13	Distal
																ENSMUSG00000049932	H2ax	Proximal
																ENSMUSG00000050705	2310061I04Rik	Distal
																ENSMUSG00000050708	Ftl1	Proximal
																ENSMUSG00000050912	Tmem123	Proximal
																ENSMUSG00000050917	Fgf4	Proximal
																ENSMUSG00000051149	Adnp	Proximal
																ENSMUSG00000051176	Zfp42	Proximal
																ENSMUSG00000051223	Bzw1	Proximal
																ENSMUSG00000051390	Zbtb22	Distal
																ENSMUSG00000051495	Irf2bp2	Distal
																ENSMUSG00000051811	Cox6b2	Distal
																ENSMUSG00000051934	Spats2	Distal
																ENSMUSG00000052146	Rps10	Proximal
																ENSMUSG00000052563	D930048N14Rik	Distal
																ENSMUSG00000052565	H1f3	Proximal
																ENSMUSG00000052658	5830454E08Rik	Distal
																ENSMUSG00000053332	Gas5	Distal
																ENSMUSG00000053560	Ier2	Proximal
																ENSMUSG00000053898	Ech1	Proximal
																ENSMUSG00000053907	Mat2a	Proximal
																ENSMUSG00000054161	Fam83e	Proximal
																ENSMUSG00000054206	Gzmm	Proximal
																ENSMUSG00000054405	Dnajc8	Distal
																ENSMUSG00000054428	Atpif1	Distal
																ENSMUSG00000054716	Zfp771	Proximal
																ENSMUSG00000054717	Hmgb2	Proximal
																ENSMUSG00000054814	Usp46	Distal
																ENSMUSG00000055041	Commd5	Distal
																ENSMUSG00000055065	Ddx17	Distal
																ENSMUSG00000055148	Klf2	Proximal
																ENSMUSG00000056155	Nanos3	Distal
																ENSMUSG00000056167	Cnot10	Distal
																ENSMUSG00000056305	Usp39	Distal
																ENSMUSG00000056429	Tgoln1	Distal
																ENSMUSG00000056458	Mok	Distal
																ENSMUSG00000056698	Elmod3	Distal
																ENSMUSG00000056753	C330011M18Rik	Distal
																ENSMUSG00000057113	Npm1	Proximal
																ENSMUSG00000057236	Rbbp4	Distal
																ENSMUSG00000057322	Rpl38	Proximal
																ENSMUSG00000057561	Eif1a	Proximal
																ENSMUSG00000057572	Zbtb8os	Distal
																ENSMUSG00000057666	Gapdh	Proximal
																ENSMUSG00000057738	Sptan1	Distal
																ENSMUSG00000057841	Rpl32	Distal
																ENSMUSG00000057863	Rpl36	Proximal
																ENSMUSG00000057948	Unc13d	Distal
																ENSMUSG00000058385	H2bc8	Proximal
																ENSMUSG00000058392	Rrp1b	Distal
																ENSMUSG00000058546	Rpl23a	Distal
																ENSMUSG00000058558	Rpl5	Proximal
																ENSMUSG00000058706	0610030E20Rik	Distal
																ENSMUSG00000058833	Rex1bd	Proximal
																ENSMUSG00000059005	Hnrnpa3	Proximal
																ENSMUSG00000059070	Rpl18	Proximal
																ENSMUSG00000059291	Rpl11	Proximal
																ENSMUSG00000059409	Ppp2r5d	Distal
																ENSMUSG00000059555	Tor4a	Distal
																ENSMUSG00000059714	Flot1	Proximal
																ENSMUSG00000059791	Nrm	Distal
																ENSMUSG00000059796	Eif4a1	Distal
																ENSMUSG00000059851	Kmt5c	Distal
																ENSMUSG00000060036	Rpl3	Proximal
																ENSMUSG00000060093	H4c1	Distal
																ENSMUSG00000060126	Tpt1	Proximal
																ENSMUSG00000060461	Dppa5a	Distal
																ENSMUSG00000060636	Rpl35a	Proximal
																ENSMUSG00000060639	H4c9	Proximal
																ENSMUSG00000060743	H3f3a	Proximal
																ENSMUSG00000060860	Ube2s	Proximal
																ENSMUSG00000060938	Rpl26	Proximal
																ENSMUSG00000061079	Zfp143	Proximal
																ENSMUSG00000061315	Naca	Proximal
																ENSMUSG00000061477	Rps7	Proximal
																ENSMUSG00000061482	H4c4	Distal
																ENSMUSG00000061615	H2ac4	Distal
																ENSMUSG00000061983	Rps12	Proximal
																ENSMUSG00000061991	H2ac10	Distal
																ENSMUSG00000062006	Rpl34	Proximal
																ENSMUSG00000062012	Zfp13	Distal
																ENSMUSG00000062619	2310039H08Rik	Distal
																ENSMUSG00000062647	Rpl7a	Proximal
																ENSMUSG00000062727	H2bc12	Proximal
																ENSMUSG00000062753	AI413582	Proximal
																ENSMUSG00000062825	Actg1	Proximal
																ENSMUSG00000062867	Impdh2	Proximal
																ENSMUSG00000063021	H2ac15	Proximal
																ENSMUSG00000063236	1110038F14Rik	Distal
																ENSMUSG00000063457	Rps15	Proximal
																ENSMUSG00000063524	Eno1	Proximal
																ENSMUSG00000063870	Chd4	Distal
																ENSMUSG00000063888	Rpl7l1	Distal
																ENSMUSG00000064194	Zfp936	Proximal
																ENSMUSG00000064288	H4c12	Proximal
																ENSMUSG00000064542	Gm22980	Distal
																ENSMUSG00000064925	Snora62	Distal
																ENSMUSG00000064984	Snord73a	Distal
																ENSMUSG00000065126	Snord104	Distal
																ENSMUSG00000065147	Snora31	Distal
																ENSMUSG00000065208	Gm24616	Distal
																ENSMUSG00000065219	Snord32a	Distal
																ENSMUSG00000065273	Gm25128	Distal
																ENSMUSG00000065637	Gm26397	Distal
																ENSMUSG00000065676	Snord42b	Distal
																ENSMUSG00000065818	Snord35a	Distal
																ENSMUSG00000065878	Snord34	Distal
																ENSMUSG00000066042	Med18	Distal
																ENSMUSG00000067148	Polr1c	Proximal
																ENSMUSG00000067150	Xpo5	Proximal
																ENSMUSG00000067274	Rplp0	Proximal
																ENSMUSG00000067288	Rps28	Proximal
																ENSMUSG00000067370	B3galt4	Proximal
																ENSMUSG00000067847	Romo1	Proximal
																ENSMUSG00000068601	Gm10244	Distal
																ENSMUSG00000068855	H2ac20	Distal
																ENSMUSG00000068856	Sf3b4	Distal
																ENSMUSG00000069267	H3c2	Distal
																ENSMUSG00000069268	H2bc7	Distal
																ENSMUSG00000069270	H2ac6	Distal
																ENSMUSG00000069272	H2ac8	Distal
																ENSMUSG00000069300	H2bc11	Distal
																ENSMUSG00000069301	H2ac11	Distal
																ENSMUSG00000069302	H2ac12	Proximal
																ENSMUSG00000069303	H2bc24	Proximal
																ENSMUSG00000069306	H4c17	Proximal
																ENSMUSG00000069307	H2bc23	Proximal
																ENSMUSG00000069310	H3c3	Proximal
																ENSMUSG00000070167	Snora57	Distal
																ENSMUSG00000070348	Ccnd1	Distal
																ENSMUSG00000070708	Gtsf1l	Distal
																ENSMUSG00000070834	Gm13015	Distal
																ENSMUSG00000070934	Rraga	Proximal
																ENSMUSG00000071054	Safb	Distal
																ENSMUSG00000071072	Ptges3	Proximal
																ENSMUSG00000071073	Lrrc73	Distal
																ENSMUSG00000071074	Yipf3	Distal
																ENSMUSG00000071172	Srsf3	Proximal
																ENSMUSG00000071415	Rpl23	Proximal
																ENSMUSG00000071478	H2ac7	Proximal
																ENSMUSG00000071516	H2ac13	Proximal
																ENSMUSG00000071533	Pcnp	Distal
																ENSMUSG00000071644	Eef1g	Proximal
																ENSMUSG00000071646	Mta2	Distal
																ENSMUSG00000071647	Eml3	Distal
																ENSMUSG00000071650	Ganab	Distal
																ENSMUSG00000071652	Ints5	Distal
																ENSMUSG00000071653	1810009A15Rik	Distal
																ENSMUSG00000071654	Uqcc3	Distal
																ENSMUSG00000071656	Lrrn4cl	Distal
																ENSMUSG00000071657	Bscl2	Distal
																ENSMUSG00000071658	Gng3	Distal
																ENSMUSG00000071661	Zbtb3	Distal
																ENSMUSG00000071866	Ppia	Proximal
																ENSMUSG00000072082	Ccnf	Proximal
																ENSMUSG00000072571	Tmem253	Distal
																ENSMUSG00000073422	H2-Ke6	Distal
																ENSMUSG00000073627	C130036L24Rik	Distal
																ENSMUSG00000073652	Apol7d	Distal
																ENSMUSG00000073676	Hspe1	Distal
																ENSMUSG00000073702	Rpl31	Proximal
																ENSMUSG00000073771	Btbd19	Distal
																ENSMUSG00000073838	Tufm	Proximal
																ENSMUSG00000074052	BC048644	Distal
																ENSMUSG00000074129	Rpl13a	Proximal
																ENSMUSG00000074136	4930513N10Rik	Distal
																ENSMUSG00000074141	Il4i1	Proximal
																ENSMUSG00000074212	Dnajb14	Proximal
																ENSMUSG00000074218	Cox7a1	Proximal
																ENSMUSG00000074221	Zfp568	Proximal
																ENSMUSG00000074576	Mocs3	Distal
																ENSMUSG00000074656	Eif2s2	Proximal
																ENSMUSG00000076439	Mog	Proximal
																ENSMUSG00000077192	Snora17	Distal
																ENSMUSG00000077222	Gm22270	Distal
																ENSMUSG00000077450	Rab11b	Distal
																ENSMUSG00000077564	Gm23202	Distal
																ENSMUSG00000077575	Gm24888	Distal
																ENSMUSG00000077711	AF357399	Distal
																ENSMUSG00000077714	Snord17	Distal
																ENSMUSG00000077734	Snord83b	Distal
																ENSMUSG00000077737	Snord72	Distal
																ENSMUSG00000078201	Tmem203	Distal
																ENSMUSG00000078440	Dohh	Distal
																ENSMUSG00000078584	AU022252	Distal
																ENSMUSG00000078812	Eif5a	Distal
																ENSMUSG00000078919	Dpm1	Distal
																ENSMUSG00000078931	Pdf	Proximal
																ENSMUSG00000079036	Alkbh1	Proximal
																ENSMUSG00000079259	Trim71	Distal
																ENSMUSG00000079445	B3gnt7	Distal
																ENSMUSG00000079471	Mymx	Distal
																ENSMUSG00000080779	Gm8731	Distal
																ENSMUSG00000081058	H3c15	Proximal
																ENSMUSG00000082436	Gm11688	Distal
																ENSMUSG00000083300	Gm12309	Distal
																ENSMUSG00000084149	Gm12944	Distal
																ENSMUSG00000085185	BC028777	Proximal
																ENSMUSG00000085385	Snhg17	Proximal
																ENSMUSG00000087166	L1td1	Proximal
																ENSMUSG00000089726	Mir17hg	Proximal
																ENSMUSG00000090862	Rps13	Proximal
																ENSMUSG00000091021	Gm17300	Proximal
																ENSMUSG00000091780	Sco2	Proximal
																ENSMUSG00000092274	Neat1	Proximal
																ENSMUSG00000092341	Malat1	Proximal
																ENSMUSG00000093577	Gm20632	Proximal
																ENSMUSG00000093904	Tomm20	Proximal
																ENSMUSG00000096740	Lbhd1	Proximal
																ENSMUSG00000099583	H3c4	Proximal
																ENSMUSG00000100210	H3c7	Proximal
																ENSMUSG00000107283	Mpv17	Proximal
																ENSMUSG00000110279	Gm45552	Proximal
																ENSMUSG00000116895	Gm3435	Proximal
																ENSMUSG00000118487	Gm50464	Proximal
